# Supplementary material for: Nanopore direct RNA sequencing maps the complexity of Arabidopsis mRNA processing and m6A modification
Source: eLife. 2020 Jan 14;9:e49658. doi: 10.7554/eLife.49658 (PMC6959997; doi:10.7554/eLife.49658)
Supplement: Figure 1—source data 1. [file elife-49658-fig1-data1.tds]

# chrom	start	end	name	logFC	strand	mean_cov	neg_log10_p_value	neg_log10_fdr
1	33754	34327	hen2-2_vs_col-0	-1.72888	-	51.1495	4.02777	2.44433
1	34401	35474	hen2-2_vs_col-0	-1.80294	-	43.5612	5.5247	3.67004
1	35567	35647	hen2-2_vs_col-0	-1.78943	-	44.8351	2.12265	1.11228
1	35730	35963	hen2-2_vs_col-0	-1.98982	-	52.0498	3.65196	2.17582
1	36624	36685	hen2-2_vs_col-0	-1.8638	-	36.8767	2.29913	1.22749
1	36810	36921	hen2-2_vs_col-0	-1.70618	-	38.6983	2.8102	1.57768
1	37023	37204	hen2-2_vs_col-0	-1.77541	-	38.3085	3.14849	1.8165
1	37569	37718	hen2-2_vs_col-0	-1.80171	-	29.0052	2.45972	1.33143
1	63483	63642	hen2-2_vs_col-0	1.33861	+	9.56161	2.39108	1.24717
1	63743	63947	hen2-2_vs_col-0	1.52963	+	14.0031	2.4899	1.31126
1	64051	64149	hen2-2_vs_col-0	1.97981	+	4.87662	2.07044	1.05667
1	74120	74615	hen2-2_vs_col-0	1.43559	+	7.44772	3.31557	1.75445
1	74734	74885	hen2-2_vs_col-0	1.38139	-	5.16212	2.22267	1.17672
1	77783	78362	hen2-2_vs_col-0	1.43337	-	11.5312	4.18624	2.56647
1	77813	78338	hen2-2_vs_col-0	1.91833	+	18.2276	3.66941	1.98957
1	78701	78926	hen2-2_vs_col-0	1.83709	+	7.23799	2.84045	1.50481
1	78724	79150	hen2-2_vs_col-0	2.21244	-	13.3899	5.74655	3.87113
1	79039	79606	hen2-2_vs_col-0	1.60738	+	12.6982	3.29339	1.74544
1	79738	80062	hen2-2_vs_col-0	1.37848	+	9.61934	2.66363	1.40508
1	80065	80483	hen2-2_vs_col-0	1.36329	+	9.07552	2.9519	1.56186
1	91634	91742	hen2-2_vs_col-0	1.58993	+	8.88794	2.2008	1.1397
1	100032	100656	hen2-2_vs_col-0	1.84037	+	100.609	3.59957	1.94517
1	129665	129920	hen2-2_vs_col-0	5.21888	+	4.70564	3.36233	1.77874
1	130140	130371	hen2-2_vs_col-0	1.78807	-	88.3316	5.10973	3.31757
1	157035	157343	hen2-2_vs_col-0	1.94371	+	4.75058	2.98867	1.5833
1	158798	158861	hen2-2_vs_col-0	3.45196	-	3.51897	2.26154	1.2028
1	158879	158940	hen2-2_vs_col-0	inf	-	3.6682	3.70912	2.21054
1	171819	172063	hen2-2_vs_col-0	2.33448	+	5.28251	2.77503	1.46944
1	172333	172487	hen2-2_vs_col-0	1.60884	+	8.12627	2.33013	1.2159
1	180669	180864	hen2-2_vs_col-0	1.14533	+	20.8462	2.25511	1.17171
1	181171	181305	hen2-2_vs_col-0	5.0999	+	3.04392	2.63346	1.39357
1	181355	181433	hen2-2_vs_col-0	4.2729	+	3.71338	2.56175	1.35159
1	196596	196852	hen2-2_vs_col-0	4.81679	-	6.18066	5.74655	3.87113
1	197523	198457	hen2-2_vs_col-0	2.46571	-	9.02445	6.22367	4.26185
1	219204	219342	hen2-2_vs_col-0	-1.75533	+	6.04008	2.48954	1.31126
1	219416	219621	hen2-2_vs_col-0	-2.15978	+	6.76734	2.63973	1.39609
1	219752	219939	hen2-2_vs_col-0	-1.88439	+	5.72948	2.47894	1.30517
1	219969	220262	hen2-2_vs_col-0	-2.33064	+	5.80612	3.01186	1.59442
1	220297	220470	hen2-2_vs_col-0	-1.54499	+	5.08087	2.00798	1.01797
1	220616	221001	hen2-2_vs_col-0	-1.82051	+	6.72095	2.89058	1.53023
1	221003	221110	hen2-2_vs_col-0	-2.07939	+	5.3922	2.44489	1.28405
1	223378	223833	hen2-2_vs_col-0	4.24652	+	8.42575	3.98558	2.16845
1	227283	227414	hen2-2_vs_col-0	1.08347	-	8.68561	2.79376	1.56402
1	232398	232461	hen2-2_vs_col-0	1.0263	-	13.0826	2.13706	1.12074
1	258808	259264	hen2-2_vs_col-0	1.43104	+	30.0808	3.46242	1.84694
1	259382	261600	hen2-2_vs_col-0	1.69051	+	10.6772	5.06197	2.69636
1	263273	263403	hen2-2_vs_col-0	2.25802	-	4.54089	3.28067	1.90773
1	266291	266486	hen2-2_vs_col-0	1.14699	+	14.0729	2.15942	1.11233
1	269983	270240	hen2-2_vs_col-0	1.29081	+	20.68	2.44796	1.28502
1	274966	275096	hen2-2_vs_col-0	1.04877	-	8.15213	2.15545	1.13242
1	299683	299880	hen2-2_vs_col-0	1.36199	+	6.41306	2.35499	1.22796
1	301561	301712	hen2-2_vs_col-0	6.90934	+	3.07566	2.58719	1.36582
1	348397	348595	hen2-2_vs_col-0	3.5154	-	4.98564	4.42433	2.75317
1	348598	348624	hen2-2_vs_col-0	4.45335	-	3.27249	2.06209	1.07162
1	353638	353877	hen2-2_vs_col-0	1.29432	-	11.742	3.09237	1.78406
1	354655	354804	hen2-2_vs_col-0	1.11297	-	7.87714	2.51772	1.37382
1	401476	401525	hen2-2_vs_col-0	4.41799	+	3.9	2.28443	1.18892
1	401542	401589	hen2-2_vs_col-0	2.89336	+	3.85119	2.06576	1.05454
1	459071	459143	hen2-2_vs_col-0	1.27962	-	5.82583	2.00785	1.03369
1	460323	460719	hen2-2_vs_col-0	1.5805	-	6.82476	4.04469	2.45724
1	465784	466095	hen2-2_vs_col-0	3.65828	+	4.12386	3.12399	1.6509
1	470621	471149	hen2-2_vs_col-0	1.10834	-	14.6472	5.10973	3.31757
1	474968	476340	hen2-2_vs_col-0	4.6102	-	9.19093	6.22367	4.26185
1	476342	476453	hen2-2_vs_col-0	inf	-	2.57398	2.72938	1.51895
1	477328	478116	hen2-2_vs_col-0	6.04893	-	5.96877	6.22367	4.26185
1	478328	478439	hen2-2_vs_col-0	inf	-	2.98788	2.4017	1.29277
1	478516	478841	hen2-2_vs_col-0	inf	-	4.60079	6.22367	4.26185
1	481655	481980	hen2-2_vs_col-0	1.27044	+	14.4853	2.58697	1.36582
1	518379	518500	hen2-2_vs_col-0	1.28064	+	26.3173	2.06955	1.05613
1	526961	527080	hen2-2_vs_col-0	1.55242	+	5.00298	2.05874	1.04992
1	555151	555257	hen2-2_vs_col-0	3.80874	+	3.73832	2.27834	1.18673
1	555259	555937	hen2-2_vs_col-0	3.71282	+	15.4348	4.81418	2.60348
1	556120	556466	hen2-2_vs_col-0	3.60647	-	6.63895	4.43834	2.75317
1	561089	561312	hen2-2_vs_col-0	2.84331	+	4.53157	2.9204	1.54394
1	575762	576704	hen2-2_vs_col-0	3.10425	+	24.5921	4.74455	2.60014
1	575939	576201	hen2-2_vs_col-0	3.04829	-	4.85524	3.89123	2.34343
1	618590	619216	hen2-2_vs_col-0	1.21589	+	21.1022	3.12322	1.6509
1	620349	620457	hen2-2_vs_col-0	1.32473	+	7.32896	2.20841	1.14461
1	622246	622976	hen2-2_vs_col-0	3.35772	-	6.28415	6.22367	4.26185
1	623126	623362	hen2-2_vs_col-0	2.93362	+	9.82248	3.14048	1.65711
1	623588	624598	hen2-2_vs_col-0	3.75334	+	9.90568	4.85369	2.62071
1	628935	629287	hen2-2_vs_col-0	1.42911	+	377.715	2.57701	1.36029
1	638126	638196	hen2-2_vs_col-0	1.32695	-	5.87022	2.86631	1.61769
1	638211	638254	hen2-2_vs_col-0	1.66669	-	4.96104	2.23668	1.18723
1	641428	641952	hen2-2_vs_col-0	2.08727	-	6.27361	4.99322	3.2165
1	641568	641874	hen2-2_vs_col-0	1.07484	+	16.9542	2.59739	1.37129
1	652928	653574	hen2-2_vs_col-0	4.22261	+	15.4133	4.89716	2.64669
1	658672	659317	hen2-2_vs_col-0	-1.712	-	56.4703	5.18228	3.36736
1	659556	659758	hen2-2_vs_col-0	-1.46524	-	61.3923	3.4209	2.00664
1	661211	661790	hen2-2_vs_col-0	-1.55169	-	47.7865	4.61089	2.88383
1	662042	662251	hen2-2_vs_col-0	-1.45842	-	56.9823	3.92482	2.36636
1	753341	753622	hen2-2_vs_col-0	1.70459	+	8.46479	2.91704	1.54281
1	754411	755583	hen2-2_vs_col-0	2.27109	+	84.2639	5.06197	2.69636
1	774324	774539	hen2-2_vs_col-0	1.11247	+	16.3535	2.51043	1.32246
1	775122	775251	hen2-2_vs_col-0	1.23181	+	15.0522	2.30968	1.20274
1	780567	780836	hen2-2_vs_col-0	1.6308	+	98.3915	2.69634	1.42327
1	781079	781215	hen2-2_vs_col-0	1.6228	+	159.894	2.4465	1.28453
1	807632	807950	hen2-2_vs_col-0	1.36688	+	24.8927	3.00477	1.59254
1	813605	813928	hen2-2_vs_col-0	1.56313	+	31.5628	3.07866	1.62572
1	826259	826364	hen2-2_vs_col-0	4.03593	-	2.73248	2.07882	1.08394
1	867062	867170	hen2-2_vs_col-0	1.30274	-	6.12058	2.1612	1.13661
1	875306	875887	hen2-2_vs_col-0	2.08291	-	94.7286	6.22367	4.26185
1	888343	889526	hen2-2_vs_col-0	1.5211	-	57.3246	6.22367	4.26185
1	889712	890027	hen2-2_vs_col-0	1.79989	-	147.225	6.22367	4.26185
1	896483	897355	hen2-2_vs_col-0	2.0792	-	33.5456	6.22367	4.26185
1	898601	898911	hen2-2_vs_col-0	1.05887	-	8.37391	3.3918	1.989
1	899091	899878	hen2-2_vs_col-0	2.7783	-	37.6913	6.22367	4.26185
1	902216	902283	hen2-2_vs_col-0	1.44932	-	4.84769	2.06989	1.07795
1	902347	902452	hen2-2_vs_col-0	1.78512	-	5.09367	2.23676	1.18723
1	902697	902810	hen2-2_vs_col-0	1.95122	-	5.8703	2.62281	1.44636
1	903166	903663	hen2-2_vs_col-0	2.13976	-	13.0519	6.22367	4.26185
1	903977	904101	hen2-2_vs_col-0	4.318	+	3.96171	2.8861	1.52926
1	904103	904216	hen2-2_vs_col-0	4.07048	+	10.6516	3.36233	1.77874
1	904132	904216	hen2-2_vs_col-0	1.76603	-	5.07059	1.99202	1.02304
1	904218	904420	hen2-2_vs_col-0	1.2933	-	21.4933	3.98063	2.4118
1	904218	904563	hen2-2_vs_col-0	4.22072	+	12.9088	4.68455	2.60014
1	904521	904615	hen2-2_vs_col-0	1.10652	-	32.6729	3.00645	1.71771
1	904585	904606	hen2-2_vs_col-0	5.03537	+	3.73052	2.00603	1.01743
1	904617	904923	hen2-2_vs_col-0	4.11988	+	5.94625	3.57277	1.92137
1	904728	904775	hen2-2_vs_col-0	1.06544	-	26.1324	2.15962	1.13549
1	904881	905004	hen2-2_vs_col-0	1.02467	-	27.9781	3.11274	1.79369
1	905119	905173	hen2-2_vs_col-0	1.33302	-	24.1597	2.84473	1.60163
1	905268	905383	hen2-2_vs_col-0	1.13955	-	46.7826	3.20207	1.85309
1	905497	905565	hen2-2_vs_col-0	1.08962	-	48.8106	2.48943	1.35233
1	905667	905784	hen2-2_vs_col-0	1.09294	-	37.3354	2.75223	1.53349
1	905943	906597	hen2-2_vs_col-0	1.27562	-	22.4621	5.74655	3.87113
1	921643	921839	hen2-2_vs_col-0	1.66046	+	4.62437	2.22327	1.15244
1	930777	930978	hen2-2_vs_col-0	1.51005	+	10.5322	2.81286	1.48724
1	936480	937593	hen2-2_vs_col-0	3.77718	-	173.146	6.22367	4.26185
1	982273	982387	hen2-2_vs_col-0	4.36909	+	4.49441	2.62679	1.39151
1	982400	982555	hen2-2_vs_col-0	3.98854	+	3.7239	2.73516	1.44873
1	1008521	1009024	hen2-2_vs_col-0	2.07955	+	143.696	3.37177	1.77874
1	1011133	1011223	hen2-2_vs_col-0	1.85406	+	5.25275	2.01266	1.02144
1	1011343	1011839	hen2-2_vs_col-0	4.2508	+	7.60276	4.03919	2.18474
1	1011841	1011867	hen2-2_vs_col-0	4.82631	+	4.19577	2.08099	1.06368
1	1011872	1012224	hen2-2_vs_col-0	6.6735	+	4.38001	3.36367	1.77874
1	1024656	1025116	hen2-2_vs_col-0	1.47354	-	9.16284	4.34861	2.68781
1	1025367	1025486	hen2-2_vs_col-0	1.98164	-	8.90893	2.96671	1.69083
1	1026066	1026362	hen2-2_vs_col-0	1.47194	-	5.39226	3.29784	1.91602
1	1026466	1026627	hen2-2_vs_col-0	1.5339	-	5.153	2.0418	1.05842
1	1027487	1027564	hen2-2_vs_col-0	1.48879	-	7.89194	2.07135	1.07898
1	1027574	1028269	hen2-2_vs_col-0	2.4897	-	47.8279	6.22367	4.26185
1	1029003	1029100	hen2-2_vs_col-0	1.3271	-	12.105	2.50809	1.36647
1	1047198	1047392	hen2-2_vs_col-0	1.09267	-	9.83297	2.70162	1.5005
1	1049014	1049299	hen2-2_vs_col-0	1.23541	-	9.54321	4.18624	2.56647
1	1093109	1093228	hen2-2_vs_col-0	-1.29669	+	7.75893	2.16557	1.11606
1	1095847	1095926	hen2-2_vs_col-0	2.64338	-	3.15804	2.1009	1.09769
1	1096305	1096699	hen2-2_vs_col-0	5.4282	-	7.71212	6.22367	4.26185
1	1119708	1120671	hen2-2_vs_col-0	1.43188	-	20.7165	5.74655	3.87113
1	1120991	1121198	hen2-2_vs_col-0	2.38919	-	5.4138	3.48887	2.05724
1	1121201	1121393	hen2-2_vs_col-0	1.8355	-	4.97816	3.15289	1.81865
1	1121418	1121551	hen2-2_vs_col-0	1.38961	-	5.2468	2.21062	1.16919
1	1121560	1121660	hen2-2_vs_col-0	2.59998	-	3.58133	2.34314	1.25481
1	1121694	1122546	hen2-2_vs_col-0	1.64162	-	21.5131	6.22367	4.26185
1	1140434	1140625	hen2-2_vs_col-0	1.31426	-	7.38988	3.57531	2.11495
1	1145979	1147425	hen2-2_vs_col-0	1.83679	+	24.4648	4.68455	2.60014
1	1147738	1148451	hen2-2_vs_col-0	1.48645	+	18.0872	3.47262	1.85575
1	1148454	1149189	hen2-2_vs_col-0	2.74715	+	6.58045	3.85577	2.08241
1	1149475	1149681	hen2-2_vs_col-0	3.15161	+	4.20635	2.48439	1.30911
1	1149751	1149869	hen2-2_vs_col-0	2.45978	+	4.39016	2.07146	1.05721
1	1150218	1150346	hen2-2_vs_col-0	2.81803	+	4.03045	2.41496	1.26388
1	1150838	1151018	hen2-2_vs_col-0	1.45365	+	8.11247	2.33187	1.21721
1	1151030	1151140	hen2-2_vs_col-0	2.64416	+	3.58366	2.21463	1.14694
1	1151258	1151378	hen2-2_vs_col-0	2.23594	+	4.31169	2.08358	1.0639
1	1151732	1151796	hen2-2_vs_col-0	2.92124	+	4.21209	2.23168	1.1569
1	1161476	1161901	hen2-2_vs_col-0	1.029	-	15.8571	4.21935	2.59332
1	1216943	1217116	hen2-2_vs_col-0	1.76889	+	137.418	2.48457	1.30911
1	1251436	1251622	hen2-2_vs_col-0	2.6691	-	5.07181	3.40743	1.99779
1	1282200	1282959	hen2-2_vs_col-0	1.09719	-	18.3863	5.26943	3.43459
1	1286301	1286532	hen2-2_vs_col-0	1.21626	-	19.1395	3.74223	2.23366
1	1291315	1291563	hen2-2_vs_col-0	1.27884	+	24.0637	2.89511	1.53182
1	1291646	1292010	hen2-2_vs_col-0	1.28826	+	15.0466	3.04078	1.6094
1	1306343	1306791	hen2-2_vs_col-0	1.26477	-	17.172	3.8526	2.30847
1	1362638	1363043	hen2-2_vs_col-0	4.42546	+	5.42417	3.78322	2.05681
1	1364208	1364646	hen2-2_vs_col-0	1.15075	-	6.01302	3.66616	2.18055
1	1390152	1390231	hen2-2_vs_col-0	1.04998	-	6.3	1.98081	1.01486
1	1392323	1392425	hen2-2_vs_col-0	1.27832	-	5.09085	2.07227	1.07946
1	1398747	1398973	hen2-2_vs_col-0	1.04043	-	10.6941	3.28867	1.91054
1	1418503	1418952	hen2-2_vs_col-0	1.01521	-	8.36873	4.00095	2.42824
1	1418677	1419094	hen2-2_vs_col-0	3.73501	+	24.9662	4.25683	2.32773
1	1426426	1426481	hen2-2_vs_col-0	2.44298	-	4.14668	2.01162	1.03627
1	1426454	1426593	hen2-2_vs_col-0	1.28746	+	17.1031	2.00509	1.01743
1	1426735	1427877	hen2-2_vs_col-0	2.18029	+	25.3403	4.25683	2.32773
1	1431439	1432406	hen2-2_vs_col-0	2.60723	+	10.2569	4.68455	2.60014
1	1435009	1435240	hen2-2_vs_col-0	4.60413	+	4.81004	3.37041	1.77874
1	1435248	1435348	hen2-2_vs_col-0	1.5965	-	4.72702	2.1115	1.10517
1	1446820	1447048	hen2-2_vs_col-0	1.73563	-	5.24735	2.82382	1.58746
1	1453901	1455295	hen2-2_vs_col-0	1.60503	-	21.7604	6.22367	4.26185
1	1496790	1497110	hen2-2_vs_col-0	inf	+	3.66222	3.11333	1.64496
1	1505154	1505560	hen2-2_vs_col-0	2.26749	+	30.3529	3.35571	1.77339
1	1522754	1523024	hen2-2_vs_col-0	2.40358	-	6.87981	4.30459	2.65459
1	1523407	1524041	hen2-2_vs_col-0	2.86157	-	17.2169	6.22367	4.26185
1	1525674	1526094	hen2-2_vs_col-0	2.05553	+	6.23753	3.11108	1.64369
1	1554051	1554100	hen2-2_vs_col-0	inf	-	3.33143	2.20062	1.16279
1	1554660	1554812	hen2-2_vs_col-0	1.21446	+	20.7526	1.99685	1.01263
1	1570246	1570428	hen2-2_vs_col-0	1.02046	-	13.9442	2.96384	1.68851
1	1582377	1582671	hen2-2_vs_col-0	1.0866	-	12.74	3.9565	2.39207
1	1583348	1583569	hen2-2_vs_col-0	1.07885	-	15.0541	4.32604	2.67
1	1595586	1595674	hen2-2_vs_col-0	1.56701	-	10.9759	2.7418	1.52695
1	1661321	1661685	hen2-2_vs_col-0	3.2345	+	6.04344	3.30376	1.74758
1	1671979	1672115	hen2-2_vs_col-0	1.68911	+	19.6846	2.24319	1.16362
1	1680300	1680486	hen2-2_vs_col-0	3.81534	-	3.55921	3.9565	2.39207
1	1715413	1715574	hen2-2_vs_col-0	1.63559	+	5.59392	2.09316	1.07068
1	1715639	1715772	hen2-2_vs_col-0	1.58308	+	9.82623	2.63973	1.39609
1	1719109	1719215	hen2-2_vs_col-0	1.37481	+	8.50601	2.14261	1.10075
1	1744460	1745746	hen2-2_vs_col-0	2.43238	-	31.0859	6.22367	4.26185
1	1761677	1761795	hen2-2_vs_col-0	3.12922	-	3.57563	2.96527	1.68967
1	1761797	1761966	hen2-2_vs_col-0	2.58328	-	5.03319	3.24276	1.88128
1	1762779	1763058	hen2-2_vs_col-0	1.01387	+	31.4888	2.29095	1.19035
1	1830465	1831278	hen2-2_vs_col-0	4.13495	+	4.29028	3.70904	2.00008
1	1831368	1831489	hen2-2_vs_col-0	3.30889	+	3.62178	2.06711	1.05506
1	1831682	1832243	hen2-2_vs_col-0	1.40142	-	11.4761	5.5247	3.67004
1	1856429	1856480	hen2-2_vs_col-0	2.88817	+	4.17857	2.01577	1.02255
1	1860166	1860586	hen2-2_vs_col-0	1.52862	-	18.914	5.74655	3.87113
1	1876921	1876955	hen2-2_vs_col-0	2.28581	-	5.43265	1.97813	1.01291
1	1877043	1877228	hen2-2_vs_col-0	2.61164	-	6.60945	3.32112	1.93205
1	1877348	1877447	hen2-2_vs_col-0	2.38999	-	3.82071	2.42897	1.30931
1	1913284	1914248	hen2-2_vs_col-0	1.57495	+	12.4361	3.98558	2.16845
1	1914278	1914977	hen2-2_vs_col-0	1.79598	+	13.6115	3.68037	1.98957
1	1939158	1939330	hen2-2_vs_col-0	3.73993	+	4.89761	2.82008	1.49265
1	1963571	1963841	hen2-2_vs_col-0	1.01816	-	7.33289	3.01711	1.72517
1	1967421	1967678	hen2-2_vs_col-0	1.36431	+	7.99917	2.86015	1.51425
1	1968075	1968282	hen2-2_vs_col-0	1.34488	+	6.12466	2.34003	1.22143
1	1968553	1968823	hen2-2_vs_col-0	1.79561	+	5.92014	2.78977	1.47875
1	1968828	1969246	hen2-2_vs_col-0	2.17062	+	5.22826	3.28215	1.74039
1	1995601	1995768	hen2-2_vs_col-0	1.03455	-	8.66327	2.14648	1.12721
1	2007899	2008011	hen2-2_vs_col-0	1.26511	+	8.35588	2.01481	1.02225
1	2008958	2009097	hen2-2_vs_col-0	1.41112	+	11.9622	2.12241	1.08996
1	2013871	2014099	hen2-2_vs_col-0	4.96896	+	6.00811	3.62568	1.96367
1	2029962	2031312	hen2-2_vs_col-0	1.59236	+	196.448	4.02669	2.18474
1	2033888	2034035	hen2-2_vs_col-0	4.0821	-	4.12066	3.51018	2.06918
1	2034086	2035485	hen2-2_vs_col-0	2.76452	-	7.67592	6.22367	4.26185
1	2045671	2046215	hen2-2_vs_col-0	1.73142	-	12.4503	4.65547	2.91876
1	2046324	2046739	hen2-2_vs_col-0	1.64038	-	12.9025	4.63261	2.90155
1	2046861	2047183	hen2-2_vs_col-0	1.84952	-	16.2406	4.30459	2.65459
1	2047230	2047642	hen2-2_vs_col-0	4.67546	-	66.0078	6.22367	4.26185
1	2068872	2069732	hen2-2_vs_col-0	1.95081	-	10.1335	5.74655	3.87113
1	2070894	2071101	hen2-2_vs_col-0	1.23094	+	8.70707	2.35133	1.22639
1	2091138	2091304	hen2-2_vs_col-0	1.83554	+	6.07186	2.50911	1.32213
1	2102959	2103096	hen2-2_vs_col-0	1.31582	-	7.44306	2.73498	1.52236
1	2142975	2143247	hen2-2_vs_col-0	2.35856	+	5.36211	2.99264	1.58471
1	2143309	2143730	hen2-2_vs_col-0	2.11765	+	4.8084	2.85681	1.51313
1	2164281	2164424	hen2-2_vs_col-0	3.52753	-	3.4375	2.60073	1.43183
1	2164482	2164634	hen2-2_vs_col-0	2.06102	-	5.84174	3.22672	1.86929
1	2164726	2165148	hen2-2_vs_col-0	1.8369	-	8.08781	3.79716	2.27193
1	2173935	2174038	hen2-2_vs_col-0	4.50164	+	4.02885	2.63371	1.39357
1	2187976	2188177	hen2-2_vs_col-0	1.13257	+	22.8023	2.3427	1.22234
1	2200220	2200306	hen2-2_vs_col-0	1.56846	+	12.0246	2.12449	1.09132
1	2228579	2228793	hen2-2_vs_col-0	1.10923	-	7.84186	2.84039	1.59912
1	2229933	2230652	hen2-2_vs_col-0	5.92326	+	4.83442	4.31259	2.35108
1	2239297	2239468	hen2-2_vs_col-0	1.96626	-	5.00332	3.59528	2.1319
1	2239470	2240110	hen2-2_vs_col-0	3.08315	-	9.36907	6.22367	4.26185
1	2265638	2265815	hen2-2_vs_col-0	2.42309	+	4.16212	2.58496	1.36437
1	2281162	2281736	hen2-2_vs_col-0	3.83783	+	4.43193	4.04558	2.18474
1	2281817	2282198	hen2-2_vs_col-0	3.99743	+	4.12229	3.1878	1.68022
1	2282204	2282474	hen2-2_vs_col-0	4.49099	+	3.90617	2.8197	1.49265
1	2282552	2282693	hen2-2_vs_col-0	4.16187	+	4.74396	2.22424	1.15301
1	2287958	2288223	hen2-2_vs_col-0	-1.53826	-	9.74329	3.0325	1.73674
1	2288309	2288415	hen2-2_vs_col-0	-1.6823	-	11.1248	2.30496	1.23115
1	2288865	2289056	hen2-2_vs_col-0	-1.85856	-	14.6797	2.53909	1.3885
1	2300506	2302208	hen2-2_vs_col-0	5.47429	+	79.9351	6.17591	3.10351
1	2359157	2359266	hen2-2_vs_col-0	3.24276	+	5.20584	2.22501	1.15301
1	2359306	2359508	hen2-2_vs_col-0	5.02261	+	4.29134	3.31677	1.75445
1	2374397	2374455	hen2-2_vs_col-0	1.28896	-	8.96731	2.13706	1.12074
1	2400299	2400486	hen2-2_vs_col-0	1.03183	-	10.7325	2.9789	1.69905
1	2408045	2408511	hen2-2_vs_col-0	1.96437	+	32.2331	3.34022	1.76298
1	2412211	2412413	hen2-2_vs_col-0	1.05334	-	14.2794	3.55622	2.09886
1	2416323	2416396	hen2-2_vs_col-0	1.64236	+	13.9527	2.11745	1.08751
1	2434043	2434356	hen2-2_vs_col-0	1.16683	-	19.5293	4.48331	2.77721
1	2434438	2434621	hen2-2_vs_col-0	1.24304	-	21.0109	3.32991	1.93974
1	2434727	2435059	hen2-2_vs_col-0	1.03017	-	24.316	3.89123	2.34343
1	2435152	2435289	hen2-2_vs_col-0	1.24866	-	21.442	2.84728	1.60293
1	2435359	2435488	hen2-2_vs_col-0	1.1229	-	19.8527	2.874	1.62433
1	2435570	2436961	hen2-2_vs_col-0	2.65145	-	9.69084	6.22367	4.26185
1	2444134	2444778	hen2-2_vs_col-0	3.51499	-	15.502	6.22367	4.26185
1	2444425	2444642	hen2-2_vs_col-0	1.12952	+	16.4522	2.37225	1.23526
1	2444665	2445001	hen2-2_vs_col-0	1.06495	+	64.9216	2.54255	1.34097
1	2445037	2445330	hen2-2_vs_col-0	1.44913	+	32.2796	3.36635	1.77874
1	2446479	2446666	hen2-2_vs_col-0	1.23864	+	5.65236	2.36467	1.23133
1	2454938	2455227	hen2-2_vs_col-0	1.20153	+	45.5995	2.55588	1.34788
1	2489730	2489861	hen2-2_vs_col-0	4.35017	+	3.48485	2.56175	1.35159
1	2494598	2495245	hen2-2_vs_col-0	2.67623	+	5.80787	4.0086	2.17126
1	2514887	2514985	hen2-2_vs_col-0	1.63736	-	4.6241	2.09164	1.09247
1	2535386	2535569	hen2-2_vs_col-0	-1.57812	+	120.433	2.60153	1.3731
1	2537937	2538098	hen2-2_vs_col-0	2.44798	-	43.4705	5.74655	3.87113
1	2564366	2564615	hen2-2_vs_col-0	1.3817	-	8.44571	3.00226	1.71525
1	2586216	2586840	hen2-2_vs_col-0	1.61662	+	14.5522	3.67212	1.98957
1	2607204	2607499	hen2-2_vs_col-0	1.54951	-	9.76014	4.34861	2.68781
1	2610328	2610573	hen2-2_vs_col-0	1.09893	-	6.9216	3.04441	1.74629
1	2610608	2610719	hen2-2_vs_col-0	1.35549	-	5.38138	1.9859	1.01816
1	2611048	2611105	hen2-2_vs_col-0	1.83704	-	4.79803	2.23883	1.18788
1	2612593	2613210	hen2-2_vs_col-0	1.36353	-	9.30166	4.99322	3.2165
1	2615031	2615426	hen2-2_vs_col-0	1.17795	+	27.8294	2.89058	1.53023
1	2615518	2615855	hen2-2_vs_col-0	1.14623	+	28.9493	2.78374	1.47474
1	2616035	2616548	hen2-2_vs_col-0	1.06897	+	34.8238	3.07108	1.62099
1	2616699	2617122	hen2-2_vs_col-0	1.42284	+	18.0745	3.16265	1.67003
1	2617299	2617598	hen2-2_vs_col-0	1.36739	+	16.1767	2.58854	1.36582
1	2617643	2617800	hen2-2_vs_col-0	1.18291	+	14.4046	2.12813	1.09341
1	2673463	2673830	hen2-2_vs_col-0	2.08411	-	13.3973	3.71179	2.21227
1	2676102	2676353	hen2-2_vs_col-0	2.25821	+	15.2781	3.32896	1.76047
1	2676356	2676631	hen2-2_vs_col-0	2.41655	+	20.3538	3.07727	1.62529
1	2676504	2676604	hen2-2_vs_col-0	4.51684	-	2.6867	2.2438	1.19083
1	2676633	2676777	hen2-2_vs_col-0	2.03781	+	14.8256	2.9814	1.58277
1	2676647	2676755	hen2-2_vs_col-0	4.35255	-	4.15662	3.69092	2.19701
1	2676856	2676951	hen2-2_vs_col-0	2.43683	+	16.6376	2.28813	1.18997
1	2676990	2677784	hen2-2_vs_col-0	2.02418	+	14.9028	3.92794	2.13011
1	2677839	2678102	hen2-2_vs_col-0	1.7104	+	9.26867	2.93213	1.54992
1	2678459	2678544	hen2-2_vs_col-0	inf	-	2.7201	1.98295	1.01613
1	2689629	2689820	hen2-2_vs_col-0	2.05392	-	5.05841	3.7907	2.26597
1	2689997	2690103	hen2-2_vs_col-0	3.73008	-	4.20093	2.20668	1.16649
1	2690968	2691107	hen2-2_vs_col-0	2.482	+	5.1551	2.41316	1.26367
1	2712375	2712503	hen2-2_vs_col-0	inf	-	4.43245	5.18228	3.36736
1	2719037	2719243	hen2-2_vs_col-0	1.71272	+	5.98861	2.48954	1.31126
1	2736640	2737267	hen2-2_vs_col-0	2.09827	+	56.8863	4.33706	2.36315
1	2746478	2746683	hen2-2_vs_col-0	1.4731	-	20.147	2.9479	1.67677
1	2746715	2747923	hen2-2_vs_col-0	1.75586	-	35.457	6.22367	4.26185
1	2751341	2751488	hen2-2_vs_col-0	2.74711	+	14.3552	2.65386	1.40123
1	2752803	2753388	hen2-2_vs_col-0	4.71781	-	7.56789	6.22367	4.26185
1	2760546	2760690	hen2-2_vs_col-0	1.19182	-	7.99261	1.97705	1.01235
1	2761146	2761249	hen2-2_vs_col-0	1.33684	-	6.24794	2.07522	1.08138
1	2817290	2817717	hen2-2_vs_col-0	1.15558	-	9.91756	4.42433	2.75317
1	2819440	2819629	hen2-2_vs_col-0	1.2008	+	12.6887	2.01879	1.02425
1	2819701	2819885	hen2-2_vs_col-0	1.43706	+	8.73668	2.5462	1.34249
1	2839586	2839820	hen2-2_vs_col-0	1.05974	+	9.62401	2.47894	1.30517
1	2855894	2856059	hen2-2_vs_col-0	-1.384	+	8.17513	2.05517	1.04859
1	2942573	2942910	hen2-2_vs_col-0	1.72447	-	643.537	5.74655	3.87113
1	2943167	2943564	hen2-2_vs_col-0	1.23267	-	390.061	4.5161	2.8062
1	2944161	2944248	hen2-2_vs_col-0	1.69882	-	719.546	3.13341	1.80556
1	2944344	2944456	hen2-2_vs_col-0	2.7176	+	8.40645	2.13582	1.09758
1	2944344	2944457	hen2-2_vs_col-0	1.61166	-	872.865	3.48887	2.05724
1	2944528	2944586	hen2-2_vs_col-0	1.64051	-	1094.7	2.9054	1.64608
1	2944730	2944781	hen2-2_vs_col-0	1.74588	-	882.146	3.09624	1.7858
1	2944902	2944966	hen2-2_vs_col-0	2.11046	-	565.129	3.20372	1.85408
1	2945066	2945115	hen2-2_vs_col-0	2.31803	-	478.176	2.04778	1.06238
1	2945200	2945303	hen2-2_vs_col-0	1.86837	-	688.364	3.44192	2.02024
1	2945381	2945475	hen2-2_vs_col-0	1.64762	-	1061.03	3.6227	2.15408
1	2945543	2945610	hen2-2_vs_col-0	1.61742	-	1406.52	3.22064	1.8663
1	2945732	2945963	hen2-2_vs_col-0	1.7786	-	780.231	5.10973	3.31757
1	2953043	2953558	hen2-2_vs_col-0	1.38259	+	47.3721	3.16774	1.67408
1	2953695	2953977	hen2-2_vs_col-0	1.0341	+	23.4319	2.44392	1.28405
1	2990135	2990309	hen2-2_vs_col-0	3.64656	-	4.12327	4.09982	2.50126
1	2990488	2990663	hen2-2_vs_col-0	3.17046	-	4.85552	4.4678	2.77292
1	2990665	2990727	hen2-2_vs_col-0	3.38284	-	3.48639	2.1714	1.14299
1	2990761	2990834	hen2-2_vs_col-0	3.41353	-	3.3639	2.21588	1.17282
1	3003368	3003470	hen2-2_vs_col-0	1.30353	-	4.93551	2.6372	1.45579
1	3034693	3035055	hen2-2_vs_col-0	1.45446	+	10.6299	3.03321	1.60426
1	3037837	3037998	hen2-2_vs_col-0	-1.08563	-	79.2857	2.16399	1.13828
1	3038063	3038361	hen2-2_vs_col-0	-1.05455	-	100.503	2.62895	1.45071
1	3038732	3039064	hen2-2_vs_col-0	1.06735	+	8.19777	2.6461	1.39741
1	3052755	3052943	hen2-2_vs_col-0	3.65778	-	4.0771	4.2369	2.59884
1	3055249	3055558	hen2-2_vs_col-0	1.01643	-	18.2168	3.51525	2.07177
1	3055636	3055737	hen2-2_vs_col-0	1.2076	-	26.2283	3.28465	1.90931
1	3055824	3056285	hen2-2_vs_col-0	1.04409	-	23.3053	4.86194	3.09317
1	3056552	3056659	hen2-2_vs_col-0	1.05816	-	22.9438	2.61826	1.44337
1	3056761	3057131	hen2-2_vs_col-0	1.47053	-	21.3851	4.99322	3.2165
1	3060266	3060431	hen2-2_vs_col-0	-1.25114	+	13.4746	2.1329	1.09538
1	3061158	3061440	hen2-2_vs_col-0	4.46662	+	5.89122	3.17116	1.67474
1	3101198	3102315	hen2-2_vs_col-0	2.36619	+	17.2819	4.42004	2.40315
1	3102632	3103035	hen2-2_vs_col-0	2.27165	+	6.66761	3.08284	1.62617
1	3123554	3123635	hen2-2_vs_col-0	4.95715	-	3.0723	2.63294	1.45357
1	3135694	3135938	hen2-2_vs_col-0	1.19809	-	6.94985	2.76142	1.54021
1	3142399	3142591	hen2-2_vs_col-0	2.01955	+	6.40896	2.45866	1.29279
1	3180172	3180724	hen2-2_vs_col-0	1.43358	-	1143.38	4.08066	2.48856
1	3223940	3224378	hen2-2_vs_col-0	1.16065	-	14.0226	3.89123	2.34343
1	3230567	3230800	hen2-2_vs_col-0	1.50038	-	5.5696	3.18664	1.84198
1	3231544	3231632	hen2-2_vs_col-0	1.31134	-	9.02006	2.33757	1.25081
1	3232017	3232137	hen2-2_vs_col-0	1.95733	-	8.50708	3.66858	2.18067
1	3232477	3232556	hen2-2_vs_col-0	1.34612	-	9.87411	2.0944	1.09353
1	3232670	3232777	hen2-2_vs_col-0	1.43284	-	10.7176	3.15511	1.81894
1	3232965	3233053	hen2-2_vs_col-0	1.25192	-	11.9631	2.22181	1.17617
1	3241282	3241540	hen2-2_vs_col-0	1.60251	-	7.15499	3.19551	1.84853
1	3241295	3241410	hen2-2_vs_col-0	1.40933	+	6.27217	2.02249	1.02696
1	3261079	3261327	hen2-2_vs_col-0	1.2794	-	7.96672	3.61837	2.15106
1	3271101	3271180	hen2-2_vs_col-0	inf	+	3.22232	2.5159	1.32535
1	3272912	3272995	hen2-2_vs_col-0	4.86575	-	2.94898	2.3869	1.28287
1	3273066	3273161	hen2-2_vs_col-0	4.60008	-	3.26935	2.8315	1.59308
1	3302777	3302996	hen2-2_vs_col-0	1.44226	+	7.59545	2.80614	1.48646
1	3303014	3303181	hen2-2_vs_col-0	1.22629	+	6.81845	2.08092	1.06368
1	3306716	3306750	hen2-2_vs_col-0	1.77508	-	4.72041	2.0288	1.0487
1	3322527	3323364	hen2-2_vs_col-0	2.91169	+	12.2796	4.74455	2.60014
1	3324044	3324178	hen2-2_vs_col-0	inf	-	3.51587	3.3168	1.92919
1	3324238	3324583	hen2-2_vs_col-0	3.3539	-	11.9308	6.22367	4.26185
1	3328442	3333250	hen2-2_vs_col-0	2.98558	-	18.4927	6.22367	4.26185
1	3356178	3356364	hen2-2_vs_col-0	4.30421	-	4.74102	4.01148	2.43597
1	3358287	3359768	hen2-2_vs_col-0	1.19757	-	59.3414	6.22367	4.26185
1	3397114	3397297	hen2-2_vs_col-0	3.28351	+	4.23486	1.98989	1.00867
1	3424367	3424795	hen2-2_vs_col-0	3.10304	+	8.15967	3.84347	2.07798
1	3439768	3440237	hen2-2_vs_col-0	2.04249	-	5.48602	4.18624	2.56647
1	3453338	3453559	hen2-2_vs_col-0	2.18004	+	6.7722	2.808	1.48646
1	3469632	3469859	hen2-2_vs_col-0	2.5435	+	15316.8	2.61398	1.38271
1	3495844	3496080	hen2-2_vs_col-0	3.07816	-	3.43882	2.96961	1.69344
1	3514516	3514646	hen2-2_vs_col-0	1.07693	-	11.5311	2.86707	1.61819
1	3517044	3517399	hen2-2_vs_col-0	2.22842	-	13.7147	5.74655	3.87113
1	3517255	3517461	hen2-2_vs_col-0	4.2574	+	4.54865	2.56408	1.35229
1	3517652	3517753	hen2-2_vs_col-0	4.56558	+	3.07633	2.03181	1.03295
1	3532730	3532917	hen2-2_vs_col-0	1.34715	+	14.8119	2.22823	1.15504
1	3549829	3549941	hen2-2_vs_col-0	1.15195	-	8.59102	2.17667	1.14651
1	3549854	3550164	hen2-2_vs_col-0	4.57085	+	5.74506	3.81989	2.07508
1	3591029	3591170	hen2-2_vs_col-0	6.61844	+	3.54477	2.21369	1.14638
1	3591918	3592275	hen2-2_vs_col-0	2.23295	-	5.76576	4.5161	2.8062
1	3648046	3650728	hen2-2_vs_col-0	4.87034	+	33.5617	6.17591	3.10351
1	3650777	3650866	hen2-2_vs_col-0	5.4727	+	4.43254	3.06904	1.61989
1	3650971	3651090	hen2-2_vs_col-0	inf	+	3.56012	2.76683	1.46594
1	3705181	3705307	hen2-2_vs_col-0	1.8846	-	4.18841	2.78323	1.55627
1	3709295	3709450	hen2-2_vs_col-0	1.03975	-	7.73764	2.64423	1.45987
1	3715622	3715742	hen2-2_vs_col-0	3.82078	-	3.20661	2.30069	1.22807
1	3741256	3741362	hen2-2_vs_col-0	1.73442	+	5.40788	2.09771	1.07417
1	3745159	3745227	hen2-2_vs_col-0	2.19706	-	3.8913	2.21223	1.1704
1	3745239	3745438	hen2-2_vs_col-0	1.55835	-	6.14036	3.96122	2.39459
1	3749522	3749674	hen2-2_vs_col-0	1.32021	+	21.9127	2.29918	1.19526
1	3774134	3774160	hen2-2_vs_col-0	inf	-	3.60053	2.11915	1.11021
1	3774170	3776015	hen2-2_vs_col-0	3.61547	-	78.5234	6.22367	4.26185
1	3774558	3775123	hen2-2_vs_col-0	3.32627	+	23.7167	4.33706	2.36315
1	3778188	3778282	hen2-2_vs_col-0	3.0252	-	4.63233	3.24916	1.88528
1	3810206	3813738	hen2-2_vs_col-0	1.5782	-	35.2041	6.22367	4.26185
1	3820843	3821385	hen2-2_vs_col-0	1.12217	-	10.7199	3.75091	2.23897
1	3846656	3846950	hen2-2_vs_col-0	1.01631	-	7.46683	3.43339	2.01367
1	3853257	3853437	hen2-2_vs_col-0	1.13324	+	38.7455	2.26289	1.17686
1	3855260	3855440	hen2-2_vs_col-0	1.21602	+	26.6172	2.51155	1.32246
1	3895089	3895234	hen2-2_vs_col-0	1.19313	-	10.4447	2.38868	1.28426
1	3945261	3945282	hen2-2_vs_col-0	4.60935	-	3.62987	2.34154	1.25405
1	3945298	3946501	hen2-2_vs_col-0	2.79533	-	7.52539	6.22367	4.26185
1	3946579	3946681	hen2-2_vs_col-0	2.97999	-	4.58669	3.75091	2.23897
1	3946836	3946896	hen2-2_vs_col-0	3.54462	-	4.12412	3.23467	1.87388
1	3961282	3961704	hen2-2_vs_col-0	2.42683	-	82.0635	6.22367	4.26185
1	3973130	3973241	hen2-2_vs_col-0	1.02912	-	10.1773	2.83896	1.5982
1	4000237	4000394	hen2-2_vs_col-0	3.53145	-	3.19756	3.13838	1.80894
1	4000414	4000444	hen2-2_vs_col-0	3.56996	-	4.30184	2.65115	1.4645
1	4000790	4001083	hen2-2_vs_col-0	6.52108	-	4.55637	5.18228	3.36736
1	4034535	4034821	hen2-2_vs_col-0	1.25052	-	18.4564	4.06833	2.47682
1	4034926	4035045	hen2-2_vs_col-0	1.279	-	32.4619	3.30198	1.91691
1	4035442	4035723	hen2-2_vs_col-0	1.09479	-	28.6315	3.89123	2.34343
1	4035804	4036133	hen2-2_vs_col-0	1.12856	-	23.5069	4.4678	2.77292
1	4036212	4036908	hen2-2_vs_col-0	1.29111	-	23.2014	5.74655	3.87113
1	4036994	4037057	hen2-2_vs_col-0	1.10585	-	25.0949	2.60993	1.43838
1	4037134	4037266	hen2-2_vs_col-0	1.2689	-	20.5704	3.01122	1.72015
1	4037377	4037476	hen2-2_vs_col-0	1.43441	-	21.4229	3.37302	1.9736
1	4037557	4037672	hen2-2_vs_col-0	1.22048	-	24.5277	2.50625	1.36525
1	4037759	4038324	hen2-2_vs_col-0	1.17755	-	31.6214	5.74655	3.87113
1	4038606	4038796	hen2-2_vs_col-0	1.62327	-	33.9293	4.6796	2.93963
1	4058174	4058296	hen2-2_vs_col-0	2.75684	+	362.355	2.70919	1.43079
1	4058413	4059072	hen2-2_vs_col-0	4.06194	+	63.6558	5.06197	2.69636
1	4058813	4058951	hen2-2_vs_col-0	4.96593	-	3.99435	3.09949	1.78722
1	4067332	4067714	hen2-2_vs_col-0	inf	+	6.01361	3.98558	2.16845
1	4069242	4069345	hen2-2_vs_col-0	inf	-	3.83104	2.79118	1.56296
1	4069363	4069496	hen2-2_vs_col-0	4.86122	-	2.70842	2.28811	1.22041
1	4086355	4086418	hen2-2_vs_col-0	4.1204	-	3.34598	2.23703	1.18725
1	4086534	4086700	hen2-2_vs_col-0	5.05935	+	4.18648	2.97152	1.57651
1	4087572	4087668	hen2-2_vs_col-0	inf	-	2.77172	2.65889	1.46925
1	4087806	4089951	hen2-2_vs_col-0	2.41712	-	28.22	6.22367	4.26185
1	4087870	4088103	hen2-2_vs_col-0	3.83727	+	5.84005	2.80949	1.48668
1	4088144	4088412	hen2-2_vs_col-0	6.9802	+	4.89963	3.66403	1.98957
1	4088424	4088486	hen2-2_vs_col-0	6.08894	+	3.36735	2.23505	1.15908
1	4089251	4090792	hen2-2_vs_col-0	5.26216	+	15.7649	6.17591	3.10351
1	4090636	4090811	hen2-2_vs_col-0	1.84203	-	16.0219	4.17059	2.55943
1	4090811	4090907	hen2-2_vs_col-0	inf	+	2.59205	2.16642	1.11616
1	4090834	4090945	hen2-2_vs_col-0	4.40381	-	5.38648	4.05635	2.46542
1	4091208	4092485	hen2-2_vs_col-0	8.12677	-	8.68567	6.22367	4.26185
1	4092663	4092845	hen2-2_vs_col-0	6.76302	+	4.0644	3.12864	1.6509
1	4092858	4093061	hen2-2_vs_col-0	4.46185	+	5.01716	3.08074	1.62617
1	4095133	4095859	hen2-2_vs_col-0	1.88792	+	11.4698	4.25683	2.32773
1	4095823	4096024	hen2-2_vs_col-0	2.22236	-	6.25566	3.65664	2.17692
1	4095923	4096056	hen2-2_vs_col-0	1.62771	+	8.94136	2.16625	1.11616
1	4105917	4106377	hen2-2_vs_col-0	1.41184	-	8.73443	5.74655	3.87113
1	4106383	4106799	hen2-2_vs_col-0	1.98869	-	9.1247	4.73231	2.98904
1	4106702	4107069	hen2-2_vs_col-0	1.45539	+	39.6219	2.9737	1.57703
1	4107123	4108167	hen2-2_vs_col-0	1.45886	+	36.4556	3.8123	2.07508
1	4107222	4107374	hen2-2_vs_col-0	5.26009	-	3.70822	3.26895	1.89916
1	4107385	4107533	hen2-2_vs_col-0	inf	-	3.20278	3.98063	2.4118
1	4107547	4107762	hen2-2_vs_col-0	4.83349	-	4.1379	4.26463	2.61728
1	4118809	4119024	hen2-2_vs_col-0	1.40719	+	13.1994	2.21161	1.14586
1	4139613	4139760	hen2-2_vs_col-0	2.53797	-	3.24614	2.37702	1.27657
1	4141238	4141388	hen2-2_vs_col-0	1.599	+	9.03075	2.19017	1.13435
1	4142181	4142472	hen2-2_vs_col-0	1.10562	+	10.0394	2.55588	1.34788
1	4142593	4142754	hen2-2_vs_col-0	1.21593	+	11.0573	2.15518	1.10895
1	4143687	4143875	hen2-2_vs_col-0	1.46591	+	8.61111	2.20311	1.14085
1	4144333	4144584	hen2-2_vs_col-0	3.11907	+	4.06151	2.86479	1.51699
1	4144943	4145055	hen2-2_vs_col-0	1.14557	+	36.4728	2.19998	1.13926
1	4150529	4151043	hen2-2_vs_col-0	2.19356	-	5.13287	4.17059	2.55943
1	4151824	4151947	hen2-2_vs_col-0	5.92863	+	3.60196	2.87859	1.52672
1	4151973	4152111	hen2-2_vs_col-0	inf	+	3.78828	2.75778	1.46155
1	4152186	4152357	hen2-2_vs_col-0	inf	+	4.66819	3.18336	1.68022
1	4152485	4152557	hen2-2_vs_col-0	inf	+	3.79452	2.58296	1.36348
1	4153714	4154183	hen2-2_vs_col-0	2.23286	-	8.9079	5.26943	3.43459
1	4154198	4154898	hen2-2_vs_col-0	4.43306	-	35.3347	6.22367	4.26185
1	4158571	4159083	hen2-2_vs_col-0	3.99454	-	14.0574	6.22367	4.26185
1	4177937	4178071	hen2-2_vs_col-0	1.50384	-	12.472	3.52383	2.07661
1	4178154	4178203	hen2-2_vs_col-0	1.67682	-	13.4071	2.4017	1.29277
1	4178382	4181305	hen2-2_vs_col-0	2.45139	-	29.0885	6.22367	4.26185
1	4181832	4181999	hen2-2_vs_col-0	1.88007	-	32.7207	4.45282	2.76381
1	4182025	4182691	hen2-2_vs_col-0	2.93412	-	66.8274	6.22367	4.26185
1	4187148	4187415	hen2-2_vs_col-0	4.6123	+	6.39872	3.80116	2.06758
1	4197048	4197189	hen2-2_vs_col-0	3.29233	+	4.94769	2.17778	1.12544
1	4222202	4222359	hen2-2_vs_col-0	4.80227	-	3.58002	3.62053	2.15235
1	4242713	4243076	hen2-2_vs_col-0	3.00179	+	9.80553	3.78322	2.05681
1	4243443	4243953	hen2-2_vs_col-0	5.82403	+	7.09156	4.33706	2.36315
1	4244037	4244297	hen2-2_vs_col-0	4.95781	+	4.06459	3.08074	1.62617
1	4323147	4323246	hen2-2_vs_col-0	5.31728	+	4.08714	2.72153	1.43896
1	4373493	4374061	hen2-2_vs_col-0	4.40614	+	6.31559	4.24649	2.32022
1	4382937	4383780	hen2-2_vs_col-0	2.68132	-	9.47884	6.22367	4.26185
1	4384341	4384475	hen2-2_vs_col-0	3.38294	-	4.35503	3.81037	2.27961
1	4394748	4394859	hen2-2_vs_col-0	5.93099	+	3.71747	3.03572	1.60587
1	4394861	4394905	hen2-2_vs_col-0	5.82372	+	3.29365	2.50855	1.32213
1	4447674	4447832	hen2-2_vs_col-0	1.21186	+	8.25067	2.12798	1.09341
1	4450731	4451210	hen2-2_vs_col-0	1.11207	+	13.3924	2.96613	1.57249
1	4451212	4451622	hen2-2_vs_col-0	1.26159	+	9.87748	2.98755	1.58304
1	4464062	4464281	hen2-2_vs_col-0	1.46912	-	6.04188	3.01604	1.72439
1	4464443	4464859	hen2-2_vs_col-0	1.33079	-	7.82203	4.04469	2.45724
1	4464863	4465545	hen2-2_vs_col-0	1.56692	-	11.8621	6.22367	4.26185
1	4468620	4468769	hen2-2_vs_col-0	2.52746	-	5.44143	3.83806	2.29757
1	4523079	4523179	hen2-2_vs_col-0	4.35727	+	3.86139	2.57701	1.36029
1	4523240	4523697	hen2-2_vs_col-0	4.75661	+	4.4724	4.04558	2.18474
1	4523359	4523870	hen2-2_vs_col-0	3.94497	-	6.71791	6.22367	4.26185
1	4524700	4525067	hen2-2_vs_col-0	7.14198	+	5.57686	3.66403	1.98957
1	4526391	4527433	hen2-2_vs_col-0	5.10931	+	18.8686	5.33081	2.69636
1	4526414	4526452	hen2-2_vs_col-0	10.5018	-	2.65751	2.04513	1.06102
1	4526471	4526571	hen2-2_vs_col-0	3.31564	-	3.20792	2.94652	1.67595
1	4526926	4527280	hen2-2_vs_col-0	3.07473	-	5.25694	6.22367	4.26185
1	4543418	4543834	hen2-2_vs_col-0	3.02973	-	6.71086	4.55157	2.8324
1	4547338	4548534	hen2-2_vs_col-0	2.03833	-	17.9388	6.22367	4.26185
1	4556906	4557019	hen2-2_vs_col-0	1.19293	+	36.0695	2.00404	1.0167
1	4576915	4577780	hen2-2_vs_col-0	1.58235	+	33.6359	3.98558	2.16845
1	4578121	4578334	hen2-2_vs_col-0	1.93881	+	5.29372	2.64764	1.39776
1	4578504	4578690	hen2-2_vs_col-0	5.02293	+	5.04354	3.2126	1.6943
1	4578812	4579327	hen2-2_vs_col-0	5.03419	+	6.45058	4.25683	2.32773
1	4579391	4579831	hen2-2_vs_col-0	5.2058	+	5.50729	3.71202	2.00008
1	4579579	4579689	hen2-2_vs_col-0	inf	-	2.87194	2.96961	1.69344
1	4579713	4579741	hen2-2_vs_col-0	5.96882	-	2.97783	1.96587	1.00514
1	4579761	4580128	hen2-2_vs_col-0	6.78044	-	3.70342	4.61089	2.88383
1	4579835	4579947	hen2-2_vs_col-0	6.56709	+	3.99747	2.94013	1.55287
1	4580306	4580398	hen2-2_vs_col-0	inf	-	3.39478	3.71179	2.21227
1	4592896	4593032	hen2-2_vs_col-0	2.83735	+	4.18822	2.22008	1.15043
1	4593038	4593131	hen2-2_vs_col-0	3.6813	+	3.3731	2.30604	1.20041
1	4593244	4593308	hen2-2_vs_col-0	1.08672	-	201.825	2.00817	1.03373
1	4593394	4593693	hen2-2_vs_col-0	1.0598	-	157.827	3.72261	2.21931
1	4611595	4611890	hen2-2_vs_col-0	6.47084	+	6.53692	3.60188	1.94597
1	4612021	4612472	hen2-2_vs_col-0	1.4473	+	36.6696	3.66671	1.98957
1	4612520	4613238	hen2-2_vs_col-0	1.25484	+	37.0433	3.66941	1.98957
1	4661041	4661194	hen2-2_vs_col-0	6.01779	-	3.11271	3.037	1.74065
1	4661345	4661527	hen2-2_vs_col-0	2.1623	-	3.96292	2.45823	1.33043
1	4661539	4662423	hen2-2_vs_col-0	2.5316	-	10.3385	5.10973	3.31757
1	4662574	4663480	hen2-2_vs_col-0	1.77085	-	143.066	6.22367	4.26185
1	4681711	4681798	hen2-2_vs_col-0	2.89202	+	3.37744	2.12303	1.09022
1	4682075	4682298	hen2-2_vs_col-0	1.04704	-	33.1014	3.3718	1.97313
1	4687993	4688169	hen2-2_vs_col-0	3.48568	+	5.58394	2.85764	1.51322
1	4688739	4688950	hen2-2_vs_col-0	1.51953	-	5.92554	3.53972	2.08789
1	4695114	4696005	hen2-2_vs_col-0	3.35854	+	11.8132	4.68455	2.60014
1	4695639	4695953	hen2-2_vs_col-0	1.03097	-	52.737	4.11308	2.50977
1	4697221	4697817	hen2-2_vs_col-0	3.4798	-	6.77925	5.74655	3.87113
1	4703378	4703546	hen2-2_vs_col-0	1.00464	-	15.9751	2.98237	1.70139
1	4740461	4740703	hen2-2_vs_col-0	1.0891	-	14.3004	3.98063	2.4118
1	4740875	4741017	hen2-2_vs_col-0	1.47044	-	12.029	2.32886	1.24698
1	4748506	4748594	hen2-2_vs_col-0	1.23718	-	11.7319	2.84984	1.60439
1	4748878	4749027	hen2-2_vs_col-0	1.76623	+	175.44	2.32742	1.21511
1	4749047	4749607	hen2-2_vs_col-0	2.88009	+	128.129	4.42004	2.40315
1	4757779	4757929	hen2-2_vs_col-0	5.89084	-	3.31079	2.89063	1.63562
1	4758060	4758114	hen2-2_vs_col-0	inf	-	3.67532	3.2917	1.91239
1	4758125	4760313	hen2-2_vs_col-0	3.65979	-	43.8398	6.22367	4.26185
1	4761600	4761773	hen2-2_vs_col-0	4.34717	-	3.57635	4.22804	2.59884
1	4761782	4761816	hen2-2_vs_col-0	inf	-	3.27959	2.25179	1.19695
1	4761980	4762158	hen2-2_vs_col-0	1.14959	-	6.30088	2.49345	1.35513
1	4788902	4789126	hen2-2_vs_col-0	1.20922	+	10.2813	2.29733	1.19476
1	4796339	4796397	hen2-2_vs_col-0	2.03731	-	4.77724	2.08156	1.08566
1	4837258	4837394	hen2-2_vs_col-0	1.1035	-	9.18196	2.71219	1.50729
1	4840681	4841013	hen2-2_vs_col-0	1.5182	-	8.95131	3.96599	2.39882
1	4841168	4841291	hen2-2_vs_col-0	1.75211	-	10.4205	2.95253	1.67945
1	4842458	4842588	hen2-2_vs_col-0	2.0776	+	14.8631	2.83015	1.49811
1	4842652	4842923	hen2-2_vs_col-0	1.28895	+	26.2287	2.67171	1.40863
1	4858708	4858865	hen2-2_vs_col-0	1.3888	-	5.88924	2.45407	1.32788
1	4858955	4859153	hen2-2_vs_col-0	1.56907	-	6.97595	2.73161	1.52045
1	4859233	4859388	hen2-2_vs_col-0	2.09136	-	5.34341	2.21845	1.17472
1	4865028	4865173	hen2-2_vs_col-0	1.22469	+	10.8209	2.03069	1.0325
1	4868525	4868653	hen2-2_vs_col-0	1.67733	+	16.3378	2.45025	1.28616
1	4877501	4879455	hen2-2_vs_col-0	4.26163	-	72.5194	6.22367	4.26185
1	4879974	4881121	hen2-2_vs_col-0	2.22897	+	18.0308	4.89716	2.64669
1	4882641	4882893	hen2-2_vs_col-0	3.19912	+	5.5319	2.63521	1.39415
1	4897905	4898667	hen2-2_vs_col-0	3.15159	-	5.3504	6.22367	4.26185
1	4898669	4898945	hen2-2_vs_col-0	2.38353	-	6.04977	4.17835	2.56413
1	4928167	4928522	hen2-2_vs_col-0	3.83249	+	15.2767	3.86416	2.08882
1	4940094	4940188	hen2-2_vs_col-0	1.05464	-	9.65038	3.11409	1.7941
1	4954595	4954810	hen2-2_vs_col-0	1.16438	+	10.4669	2.35512	1.22796
1	4955029	4955243	hen2-2_vs_col-0	1.2286	+	8.97276	2.27834	1.18673
1	4957730	4957853	hen2-2_vs_col-0	1.22035	+	9.46832	2.00188	1.01584
1	4990419	4990739	hen2-2_vs_col-0	2.11865	-	5.5652	4.90145	3.13005
1	4994772	4994993	hen2-2_vs_col-0	5.2077	+	6.50901	3.47607	1.85782
1	5015800	5015918	hen2-2_vs_col-0	1.17769	-	5.88595	1.95845	1.00016
1	5023455	5023560	hen2-2_vs_col-0	2.20984	+	20.0445	3.00771	1.59254
1	5023652	5025716	hen2-2_vs_col-0	1.97667	+	30.481	5.47694	2.69636
1	5025809	5026405	hen2-2_vs_col-0	2.09066	+	29.0584	4.02669	2.18474
1	5026496	5026927	hen2-2_vs_col-0	2.03442	+	22.2174	3.68595	1.98957
1	5030751	5030897	hen2-2_vs_col-0	1.38225	+	49.1239	2.20664	1.14381
1	5031512	5031835	hen2-2_vs_col-0	1.39974	+	29.4685	2.77989	1.47295
1	5040813	5040998	hen2-2_vs_col-0	1.65149	+	8.59332	2.79372	1.47917
1	5042618	5042916	hen2-2_vs_col-0	1.32923	+	52.489	2.56281	1.35159
1	5061613	5064105	hen2-2_vs_col-0	2.69383	+	10.229	6.17591	3.10351
1	5064176	5064357	hen2-2_vs_col-0	3.21486	+	4.62166	2.74924	1.45795
1	5088443	5088700	hen2-2_vs_col-0	1.44238	-	7.39009	3.82055	2.28367
1	5104975	5106113	hen2-2_vs_col-0	4.19059	+	13.0298	5.33081	2.69636
1	5125860	5125957	hen2-2_vs_col-0	2.96616	-	3.18659	2.45274	1.32675
1	5125969	5126092	hen2-2_vs_col-0	2.88652	-	3.19643	2.72882	1.51887
1	5137341	5137931	hen2-2_vs_col-0	1.58998	-	10.4813	5.74655	3.87113
1	5146807	5146908	hen2-2_vs_col-0	3.14594	-	3.39426	2.61099	1.43922
1	5146912	5146987	hen2-2_vs_col-0	3.81952	-	4.67481	3.76883	2.25103
1	5169678	5170229	hen2-2_vs_col-0	3.0876	-	77.622	6.22367	4.26185
1	5170414	5170562	hen2-2_vs_col-0	2.971	-	97.4736	6.22367	4.26185
1	5176610	5177505	hen2-2_vs_col-0	4.71146	+	5.7547	3.81989	2.07508
1	5181862	5182501	hen2-2_vs_col-0	4.15763	+	6.57132	4.60771	2.53531
1	5192164	5192442	hen2-2_vs_col-0	1.49204	+	17.1403	2.54093	1.34095
1	5193225	5193332	hen2-2_vs_col-0	3.42445	+	3.7414	2.44667	1.28453
1	5215921	5216200	hen2-2_vs_col-0	1.00915	-	9.36633	2.92942	1.66383
1	5216658	5216746	hen2-2_vs_col-0	1.08412	-	5.15088	2.1665	1.13936
1	5220650	5220881	hen2-2_vs_col-0	1.72648	-	7.89932	3.89123	2.34343
1	5220911	5221072	hen2-2_vs_col-0	1.15247	-	11.8686	1.97494	1.0112
1	5221075	5221469	hen2-2_vs_col-0	1.19932	-	13.4517	3.36936	1.97107
1	5221495	5221714	hen2-2_vs_col-0	1.08667	-	11.2042	2.98941	1.70585
1	5221826	5222761	hen2-2_vs_col-0	1.12737	-	15.6934	5.5247	3.67004
1	5231556	5231760	hen2-2_vs_col-0	1.07962	-	10.6693	3.09366	1.78474
1	5232593	5233409	hen2-2_vs_col-0	1.04585	-	10.5615	4.99322	3.2165
1	5233493	5233599	hen2-2_vs_col-0	1.53372	-	13.5374	3.45062	2.02578
1	5235039	5235285	hen2-2_vs_col-0	1.12846	-	13.6536	2.59192	1.42588
1	5235527	5235657	hen2-2_vs_col-0	1.05593	-	13.2933	2.64675	1.46194
1	5235742	5236331	hen2-2_vs_col-0	1.04194	-	16.2764	4.45282	2.76381
1	5236507	5236779	hen2-2_vs_col-0	1.14567	-	16.6533	3.22064	1.8663
1	5252393	5252478	hen2-2_vs_col-0	1.83362	+	9.49252	2.04037	1.03817
1	5265803	5268406	hen2-2_vs_col-0	1.03785	-	20.369	6.22367	4.26185
1	5291345	5291437	hen2-2_vs_col-0	3.5708	-	3.03763	2.11023	1.10492
1	5295998	5296399	hen2-2_vs_col-0	3.78912	+	4.57001	3.54548	1.9004
1	5298354	5298587	hen2-2_vs_col-0	2.29811	-	5.14133	4.53347	2.81896
1	5310341	5310449	hen2-2_vs_col-0	2.07034	-	4.50131	2.40472	1.29354
1	5312282	5312388	hen2-2_vs_col-0	3.54294	-	4.53672	3.1306	1.80402
1	5312741	5312871	hen2-2_vs_col-0	2.41307	-	3.79771	2.6372	1.45579
1	5325341	5326221	hen2-2_vs_col-0	3.40051	+	19.605	4.94546	2.64669
1	5332393	5332539	hen2-2_vs_col-0	1.31648	+	9.80855	2.05709	1.04948
1	5334685	5335721	hen2-2_vs_col-0	1.78774	+	7.52101	4.02669	2.18474
1	5335876	5336071	hen2-2_vs_col-0	1.99357	+	4.69169	2.75977	1.46188
1	5336301	5336553	hen2-2_vs_col-0	1.8577	+	4.78487	2.51666	1.32559
1	5375138	5375233	hen2-2_vs_col-0	2.35183	+	5.50967	2.42656	1.27371
1	5397836	5397945	hen2-2_vs_col-0	4.1053	+	3.91429	2.31372	1.20511
1	5420697	5420836	hen2-2_vs_col-0	1.03081	-	19.7434	2.57678	1.4155
1	5442659	5442994	hen2-2_vs_col-0	1.8977	+	5.64349	3.12476	1.6509
1	5443025	5443159	hen2-2_vs_col-0	2.49095	+	3.74868	2.11593	1.08671
1	5457819	5457978	hen2-2_vs_col-0	1.37298	+	10.5634	2.29004	1.19035
1	5458259	5458377	hen2-2_vs_col-0	1.61333	+	8.58944	2.38233	1.24078
1	5464741	5465024	hen2-2_vs_col-0	4.21176	-	4.72032	5.10973	3.31757
1	5478771	5479276	hen2-2_vs_col-0	3.30271	-	8.4729	5.26943	3.43459
1	5485079	5485423	hen2-2_vs_col-0	1.90297	-	5.0617	3.37795	1.97703
1	5508547	5508753	hen2-2_vs_col-0	1.20109	+	15.8582	2.55755	1.34847
1	5509339	5509478	hen2-2_vs_col-0	2.94492	+	10.1474	2.76818	1.46629
1	5509491	5509682	hen2-2_vs_col-0	2.29563	+	16.1856	3.04848	1.61138
1	5509869	5509981	hen2-2_vs_col-0	2.11084	+	20.3262	2.54538	1.34226
1	5510247	5510324	hen2-2_vs_col-0	1.97349	+	29.8022	2.38191	1.24078
1	5511019	5511143	hen2-2_vs_col-0	1.88965	+	4.48229	2.05583	1.04871
1	5511145	5511616	hen2-2_vs_col-0	1.18644	+	59.0519	2.98251	1.58304
1	5563365	5563496	hen2-2_vs_col-0	1.27192	+	20.8382	2.12782	1.09341
1	5590522	5590610	hen2-2_vs_col-0	-1.80416	-	20.9831	2.39495	1.28831
1	5605054	5605224	hen2-2_vs_col-0	1.59523	+	14.6629	2.89013	1.53023
1	5611006	5611088	hen2-2_vs_col-0	4.80027	-	2.53356	2.16233	1.13725
1	5611170	5611388	hen2-2_vs_col-0	3.86573	-	4.68461	4.76127	3.01635
1	5629221	5629261	hen2-2_vs_col-0	4.33593	-	3.02787	2.33208	1.24876
1	5629277	5629350	hen2-2_vs_col-0	5.58371	-	3.40251	2.75459	1.5356
1	5647360	5647553	hen2-2_vs_col-0	2.22734	-	5.3542	2.9889	1.70563
1	5647447	5647518	hen2-2_vs_col-0	inf	+	3.37698	2.2821	1.18802
1	5651551	5651656	hen2-2_vs_col-0	1.28515	-	5.37332	2.00416	1.03113
1	5685076	5686332	hen2-2_vs_col-0	3.26949	-	102.969	6.22367	4.26185
1	5685587	5686041	hen2-2_vs_col-0	4.28924	+	27.2078	4.68455	2.60014
1	5697558	5697694	hen2-2_vs_col-0	1.10282	+	9.50886	2.11322	1.08471
1	5729065	5729532	hen2-2_vs_col-0	1.46363	-	67.7038	6.22367	4.26185
1	5729613	5729732	hen2-2_vs_col-0	1.35041	-	72.7929	3.54698	2.09302
1	5729812	5729909	hen2-2_vs_col-0	1.4161	-	79.5977	3.73091	2.22522
1	5729912	5730055	hen2-2_vs_col-0	1.46397	-	41.6865	3.62928	2.16022
1	5730136	5730235	hen2-2_vs_col-0	1.49685	-	90.0114	3.66376	2.17952
1	5730317	5730804	hen2-2_vs_col-0	1.51286	-	88.3302	6.22367	4.26185
1	5730884	5731033	hen2-2_vs_col-0	1.42651	-	90.4005	4.31519	2.65982
1	5731131	5731247	hen2-2_vs_col-0	1.54716	-	55.3736	4.6796	2.93963
1	5731338	5731424	hen2-2_vs_col-0	1.30311	-	81.5854	3.31251	1.92563
1	5731528	5731558	hen2-2_vs_col-0	1.40048	-	100.961	2.2847	1.21891
1	5731652	5731857	hen2-2_vs_col-0	1.65966	-	67.1564	4.79231	3.03477
1	5737866	5737966	hen2-2_vs_col-0	1.69241	-	4.9802	2.12937	1.11599
1	5737968	5738764	hen2-2_vs_col-0	2.43282	-	13.4941	6.22367	4.26185
1	5744038	5744111	hen2-2_vs_col-0	1.72463	-	7.03089	2.81155	1.57876
1	5755762	5756139	hen2-2_vs_col-0	1.14055	+	25.5567	2.74664	1.45763
1	5757833	5758191	hen2-2_vs_col-0	1.16709	-	15.6926	3.80703	2.27879
1	5758193	5758370	hen2-2_vs_col-0	1.20513	-	8.61677	2.874	1.62433
1	5760678	5760866	hen2-2_vs_col-0	1.41009	+	6.3613	2.15237	1.10787
1	5761568	5761713	hen2-2_vs_col-0	1.52546	+	5.21282	2.22716	1.15436
1	5774667	5775330	hen2-2_vs_col-0	3.29119	-	12.7739	6.22367	4.26185
1	5786418	5786779	hen2-2_vs_col-0	3.62168	+	8.14108	3.98558	2.16845
1	5800564	5800639	hen2-2_vs_col-0	1.80175	-	4.50752	2.26372	1.20448
1	5817658	5817924	hen2-2_vs_col-0	1.58985	+	8.32611	2.69923	1.42491
1	5818149	5818270	hen2-2_vs_col-0	1.32911	+	9.9678	2.01236	1.02144
1	5818605	5818809	hen2-2_vs_col-0	1.48511	+	10.1948	2.7089	1.43079
1	5842241	5842885	hen2-2_vs_col-0	1.04635	-	22.4106	4.99322	3.2165
1	5843363	5843449	hen2-2_vs_col-0	2.22265	-	3.76437	2.24535	1.19188
1	5844096	5844251	hen2-2_vs_col-0	2.19569	-	7.62546	4.21935	2.59332
1	5895405	5895675	hen2-2_vs_col-0	1.27565	-	8.94676	3.47626	2.04704
1	5895889	5897046	hen2-2_vs_col-0	4.92141	+	10.5947	5.47694	2.69636
1	5897142	5897433	hen2-2_vs_col-0	4.88107	+	5.46306	3.49558	1.86608
1	5897468	5897827	hen2-2_vs_col-0	6.86003	+	5.06786	3.81989	2.07508
1	5897887	5897970	hen2-2_vs_col-0	1.82821	-	3.83503	2.05893	1.06921
1	5897983	5898812	hen2-2_vs_col-0	4.91058	+	5.73933	4.99982	2.67136
1	5899969	5900082	hen2-2_vs_col-0	2.47636	+	9.63346	2.65858	1.40272
1	5942269	5942347	hen2-2_vs_col-0	1.40598	+	8.50452	2.12073	1.0892
1	5970813	5970974	hen2-2_vs_col-0	1.59288	-	7.61332	3.81374	2.28247
1	5982993	5983334	hen2-2_vs_col-0	5.4051	-	5.28133	6.22367	4.26185
1	5988806	5988911	hen2-2_vs_col-0	1.35909	-	6.09501	2.74237	1.52695
1	5998832	5999010	hen2-2_vs_col-0	1.1654	+	34.3021	1.99553	1.01248
1	6000443	6000597	hen2-2_vs_col-0	1.11387	+	26.5608	2.02213	1.02693
1	6008357	6008387	hen2-2_vs_col-0	3.69316	-	3.43548	2.52653	1.37992
1	6008397	6009373	hen2-2_vs_col-0	3.8025	-	11.6842	6.22367	4.26185
1	6052812	6052914	hen2-2_vs_col-0	1.61539	+	5.77462	2.08442	1.0644
1	6053044	6053170	hen2-2_vs_col-0	1.36911	+	6.03768	2.00574	1.01743
1	6056329	6056458	hen2-2_vs_col-0	2.29488	+	4.19341	2.52145	1.32777
1	6072303	6072468	hen2-2_vs_col-0	1.98576	-	5.81454	2.61718	1.44319
1	6072635	6072762	hen2-2_vs_col-0	1.37405	-	8.38058	2.60951	1.43818
1	6073003	6073101	hen2-2_vs_col-0	1.62664	-	8.92208	2.29851	1.22749
1	6073181	6073268	hen2-2_vs_col-0	2.21376	-	6.08279	2.33409	1.24985
1	6073470	6073522	hen2-2_vs_col-0	2.05075	-	8.22776	2.47509	1.34207
1	6073873	6074465	hen2-2_vs_col-0	2.07031	-	10.0801	6.22367	4.26185
1	6101776	6101941	hen2-2_vs_col-0	2.00351	+	5.0852	2.21095	1.14559
1	6101968	6102371	hen2-2_vs_col-0	2.23162	+	5.65329	3.32039	1.75683
1	6124678	6124802	hen2-2_vs_col-0	1.45069	-	4.68914	1.97641	1.01212
1	6124810	6124916	hen2-2_vs_col-0	1.58591	-	5.44459	3.00856	1.71895
1	6131047	6131338	hen2-2_vs_col-0	1.07758	+	32.0369	2.40631	1.25913
1	6138210	6138315	hen2-2_vs_col-0	3.83552	+	3.469	2.00686	1.01743
1	6140709	6141549	hen2-2_vs_col-0	3.50689	+	5.33727	4.12283	2.22388
1	6140774	6141355	hen2-2_vs_col-0	5.95339	-	6.23625	6.22367	4.26185
1	6169797	6169898	hen2-2_vs_col-0	1.19237	-	72.2003	3.10145	1.78734
1	6170851	6170918	hen2-2_vs_col-0	1.08379	-	92.7227	2.64218	1.45805
1	6171021	6171124	hen2-2_vs_col-0	1.09738	-	90.8043	2.9281	1.66306
1	6171476	6171534	hen2-2_vs_col-0	1.00536	-	104.121	2.52305	1.37753
1	6171622	6171696	hen2-2_vs_col-0	1.01103	-	112.424	2.67356	1.47766
1	6171788	6172173	hen2-2_vs_col-0	1.08453	-	88.9291	4.65547	2.91876
1	6175032	6175143	hen2-2_vs_col-0	inf	+	4.20281	2.66711	1.4058
1	6193747	6194286	hen2-2_vs_col-0	2.2766	-	182.247	6.22367	4.26185
1	6193985	6194185	hen2-2_vs_col-0	2.79499	+	4.95771	2.58141	1.36248
1	6194232	6194905	hen2-2_vs_col-0	3.46903	+	70.5738	4.89716	2.64669
1	6196225	6196429	hen2-2_vs_col-0	1.2329	+	33.6767	2.2692	1.18071
1	6212851	6213137	hen2-2_vs_col-0	3.0555	+	3.66476	2.62999	1.39183
1	6220032	6221100	hen2-2_vs_col-0	3.24056	+	104.535	5.22167	2.69636
1	6220139	6221016	hen2-2_vs_col-0	4.70607	-	16.1657	6.22367	4.26185
1	6227280	6227400	hen2-2_vs_col-0	2.14471	-	5.46045	2.7702	1.54625
1	6227642	6227683	hen2-2_vs_col-0	2.91377	-	3.44048	2.03337	1.05242
1	6264383	6264853	hen2-2_vs_col-0	2.63714	-	6.71065	5.74655	3.87113
1	6267874	6268278	hen2-2_vs_col-0	3.7227	+	9.10741	4.0329	2.18474
1	6313625	6313703	hen2-2_vs_col-0	2.06365	-	7.03526	2.63562	1.45513
1	6326088	6326131	hen2-2_vs_col-0	1.81172	-	4.48864	2.00129	1.02882
1	6326383	6326601	hen2-2_vs_col-0	1.63481	-	6.65232	3.464	2.03638
1	6342223	6342356	hen2-2_vs_col-0	4.51357	+	4.24467	2.68357	1.41487
1	6351973	6352076	hen2-2_vs_col-0	2.96236	-	3.81113	2.42592	1.3071
1	6390495	6390533	hen2-2_vs_col-0	3.44068	-	3.67033	2.27238	1.2097
1	6408679	6408731	hen2-2_vs_col-0	3.14328	-	3.38005	2.29512	1.22532
1	6408746	6409357	hen2-2_vs_col-0	4.02258	-	6.88644	6.22367	4.26185
1	6416354	6416410	hen2-2_vs_col-0	1.08076	-	6.98371	2.62302	1.44636
1	6419325	6419888	hen2-2_vs_col-0	2.53216	+	10.3286	3.87272	2.09337
1	6419947	6420092	hen2-2_vs_col-0	1.16934	+	7.78571	2.35512	1.22796
1	6427004	6428831	hen2-2_vs_col-0	4.31817	+	14.813	6.17591	3.10351
1	6428945	6429244	hen2-2_vs_col-0	5.64723	+	4.88048	3.30845	1.75095
1	6429323	6429440	hen2-2_vs_col-0	inf	+	3.50605	2.37913	1.23939
1	6432509	6433114	hen2-2_vs_col-0	4.67232	+	8.67032	4.77797	2.60014
1	6434677	6434865	hen2-2_vs_col-0	1.18512	+	12.4618	2.34079	1.22175
1	6434910	6435167	hen2-2_vs_col-0	1.13398	+	43.706	2.3808	1.24059
1	6435231	6436903	hen2-2_vs_col-0	1.27833	+	44.5957	4.25683	2.32773
1	6442144	6442199	hen2-2_vs_col-0	4.91786	-	3.30612	2.55315	1.39725
1	6442273	6443009	hen2-2_vs_col-0	2.62687	-	8.51997	6.22367	4.26185
1	6444410	6444510	hen2-2_vs_col-0	4.78054	+	3.24328	2.0391	1.03757
1	6444815	6444940	hen2-2_vs_col-0	inf	-	3.68311	3.34115	1.94874
1	6450914	6451094	hen2-2_vs_col-0	1.11786	+	74.6259	2.31408	1.20511
1	6451438	6451607	hen2-2_vs_col-0	5.47525	-	3.8605	3.5085	2.06915
1	6451729	6451794	hen2-2_vs_col-0	inf	-	2.48268	2.19368	1.15837
1	6451805	6453008	hen2-2_vs_col-0	2.89898	-	24.8409	6.22367	4.26185
1	6459105	6459511	hen2-2_vs_col-0	1.49886	+	46.348	2.99264	1.58471
1	6529289	6529604	hen2-2_vs_col-0	1.47694	+	14.5698	3.01846	1.59839
1	6537370	6537452	hen2-2_vs_col-0	2.78438	-	4.17556	3.03926	1.74233
1	6537487	6538054	hen2-2_vs_col-0	1.03728	-	11.4214	5.10973	3.31757
1	6557221	6558027	hen2-2_vs_col-0	1.14144	-	32.5853	5.10973	3.31757
1	6561044	6562049	hen2-2_vs_col-0	3.14308	+	16.5575	5.22167	2.69636
1	6562093	6562315	hen2-2_vs_col-0	2.47965	+	7.30237	3.22312	1.69816
1	6565729	6565868	hen2-2_vs_col-0	1.37997	+	23.5679	2.08456	1.0644
1	6612752	6613035	hen2-2_vs_col-0	2.08216	-	4.45372	3.46552	2.03709
1	6613096	6613227	hen2-2_vs_col-0	2.92805	-	3.36418	2.67039	1.47636
1	6627004	6627259	hen2-2_vs_col-0	1.68072	+	5.86523	2.66123	1.40477
1	6628778	6628854	hen2-2_vs_col-0	2.59587	+	4.16327	2.03456	1.03404
1	6682521	6682780	hen2-2_vs_col-0	4.85402	+	3.41126	2.9545	1.56186
1	6684545	6685288	hen2-2_vs_col-0	1.09702	+	31.7781	3.3913	1.79205
1	6686000	6686061	hen2-2_vs_col-0	4.474	-	2.75576	1.95855	1.00016
1	6686313	6686459	hen2-2_vs_col-0	3.53099	-	3.75316	3.66376	2.17952
1	6686461	6686479	hen2-2_vs_col-0	3.28331	-	4.2782	2.57717	1.41568
1	6686530	6686729	hen2-2_vs_col-0	2.32476	-	6.7675	3.77496	2.25618
1	6697011	6698067	hen2-2_vs_col-0	3.25694	+	98.1715	5.13452	2.69636
1	6697270	6697369	hen2-2_vs_col-0	3.21376	-	3.64857	2.43742	1.31638
1	6697450	6697553	hen2-2_vs_col-0	2.12139	-	4.40659	2.37223	1.27409
1	6709804	6710677	hen2-2_vs_col-0	2.04452	+	152.655	4.02669	2.18474
1	6710740	6711528	hen2-2_vs_col-0	1.98034	+	115.04	3.9532	2.1469
1	6711362	6711607	hen2-2_vs_col-0	2.24897	-	3.90244	3.29784	1.91602
1	6711608	6711786	hen2-2_vs_col-0	1.78892	+	199.129	2.46707	1.29874
1	6712738	6713316	hen2-2_vs_col-0	1.90102	+	22.7913	3.54144	1.9004
1	6713345	6713591	hen2-2_vs_col-0	1.36325	+	8.88201	2.50483	1.31994
1	6756757	6756828	hen2-2_vs_col-0	1.4657	-	5.76984	2.36399	1.26747
1	6756881	6757015	hen2-2_vs_col-0	1.96852	-	8.16085	3.25753	1.89227
1	6803437	6803942	hen2-2_vs_col-0	6.36453	+	4.02626	3.95843	2.14998
1	6822914	6823445	hen2-2_vs_col-0	4.57186	+	22.1876	4.63184	2.55548
1	6891452	6892518	hen2-2_vs_col-0	1.01285	-	78.796	6.22367	4.26185
1	6893000	6894721	hen2-2_vs_col-0	1.51629	-	54.2732	6.22367	4.26185
1	6907158	6907318	hen2-2_vs_col-0	1.62739	-	7.45697	2.29666	1.22598
1	6907334	6907792	hen2-2_vs_col-0	1.84536	-	7.19966	4.45282	2.76381
1	6907807	6908051	hen2-2_vs_col-0	1.41247	-	7.13061	2.86937	1.62023
1	6908053	6908690	hen2-2_vs_col-0	1.84573	-	7.03247	5.10973	3.31757
1	6928465	6928614	hen2-2_vs_col-0	3.83304	-	4.88048	4.19429	2.56951
1	6928757	6928895	hen2-2_vs_col-0	4.79085	-	5.64491	3.48887	2.05724
1	6930411	6930640	hen2-2_vs_col-0	1.35707	+	10.2801	2.27779	1.18673
1	6930642	6930966	hen2-2_vs_col-0	1.98087	+	7.32637	2.88388	1.52899
1	6939739	6940300	hen2-2_vs_col-0	4.63061	+	28.7947	4.81418	2.60348
1	6940575	6940719	hen2-2_vs_col-0	1.29673	-	6.767	3.00174	1.71508
1	6941175	6942541	hen2-2_vs_col-0	4.15822	+	128.807	6.17591	3.10351
1	6941529	6941643	hen2-2_vs_col-0	4.22946	-	2.94534	2.52933	1.38189
1	6941695	6941755	hen2-2_vs_col-0	2.81897	-	4.16979	2.9479	1.67677
1	6941768	6942028	hen2-2_vs_col-0	3.05554	-	5.18719	4.53347	2.81896
1	6946877	6947202	hen2-2_vs_col-0	1.03233	+	51.1492	2.52415	1.32943
1	6958004	6959212	hen2-2_vs_col-0	1.76599	-	34.947	6.22367	4.26185
1	6958316	6958418	hen2-2_vs_col-0	3.62515	+	3.30236	2.01818	1.02397
1	6961412	6961492	hen2-2_vs_col-0	inf	+	3.74162	2.80651	1.48646
1	6968474	6968548	hen2-2_vs_col-0	3.08377	-	3.3219	2.29594	1.22579
1	7038632	7039134	hen2-2_vs_col-0	2.91965	+	8.35373	3.98558	2.16845
1	7069142	7069532	hen2-2_vs_col-0	-1.48221	+	7.64852	2.92088	1.54394
1	7069535	7069678	hen2-2_vs_col-0	-1.34881	+	6.56796	2.20879	1.14461
1	7069687	7069830	hen2-2_vs_col-0	-1.77366	+	6.91815	2.40249	1.25624
1	7070395	7070536	hen2-2_vs_col-0	-1.31231	+	6.53924	2.09094	1.06881
1	7070823	7070910	hen2-2_vs_col-0	-1.50493	+	6.09984	2.12767	1.09341
1	7071043	7071326	hen2-2_vs_col-0	-1.53417	+	7.39261	2.61493	1.38309
1	7084446	7085025	hen2-2_vs_col-0	2.18051	+	12.6097	3.82761	2.07508
1	7085290	7085325	hen2-2_vs_col-0	3.40584	+	4.18849	2.08113	1.06368
1	7085534	7085832	hen2-2_vs_col-0	1.45087	+	8.18012	2.70919	1.43079
1	7088234	7089654	hen2-2_vs_col-0	2.56968	+	27.5561	5.06197	2.69636
1	7089656	7090033	hen2-2_vs_col-0	4.96997	+	7.10128	4.33706	2.36315
1	7131693	7131789	hen2-2_vs_col-0	1.31678	-	6.7894	2.57874	1.41619
1	7137219	7137372	hen2-2_vs_col-0	1.0227	-	29.974	3.76277	2.24693
1	7137431	7137736	hen2-2_vs_col-0	1.15791	-	41.2908	4.76127	3.01635
1	7139419	7139712	hen2-2_vs_col-0	inf	-	5.21331	5.74655	3.87113
1	7139861	7140061	hen2-2_vs_col-0	6.41733	-	4.97797	4.22804	2.59884
1	7143201	7143285	hen2-2_vs_col-0	1.97842	-	3.91513	2.17094	1.14269
1	7145691	7145780	hen2-2_vs_col-0	1.48534	-	6.86984	2.5756	1.41455
1	7145880	7145963	hen2-2_vs_col-0	1.42097	-	7.02381	2.7192	1.51287
1	7145972	7146041	hen2-2_vs_col-0	1.52391	-	8.55816	1.96626	1.00529
1	7146134	7146354	hen2-2_vs_col-0	2.03477	-	5.08274	3.21806	1.86507
1	7162557	7162612	hen2-2_vs_col-0	2.14406	-	4.625	2.76503	1.54307
1	7162623	7163195	hen2-2_vs_col-0	1.97754	-	7.59013	4.99322	3.2165
1	7174368	7176448	hen2-2_vs_col-0	2.0819	-	76.7042	6.22367	4.26185
1	7242981	7243044	hen2-2_vs_col-0	2.66917	+	21.9587	2.0716	1.05721
1	7261442	7261481	hen2-2_vs_col-0	1.79593	-	5.49464	2.19352	1.15837
1	7285072	7285172	hen2-2_vs_col-0	1.70501	+	21.3437	2.29379	1.19241
1	7285240	7285501	hen2-2_vs_col-0	1.43624	+	32.7694	2.93912	1.55287
1	7286408	7286638	hen2-2_vs_col-0	1.34168	+	31.8735	2.59124	1.36787
1	7286666	7288843	hen2-2_vs_col-0	1.29141	+	56.2772	4.89716	2.64669
1	7289027	7289309	hen2-2_vs_col-0	1.29565	+	107.051	2.6523	1.40123
1	7289386	7290047	hen2-2_vs_col-0	1.51836	+	126.742	3.32896	1.76047
1	7330798	7330962	hen2-2_vs_col-0	1.19902	-	7.06537	2.53981	1.3885
1	7338367	7339107	hen2-2_vs_col-0	3.97353	-	10.8318	6.22367	4.26185
1	7339320	7339419	hen2-2_vs_col-0	3.90321	-	2.98714	2.03748	1.05538
1	7366516	7366564	hen2-2_vs_col-0	8.12412	+	3.26531	2.27768	1.18673
1	7367449	7368088	hen2-2_vs_col-0	2.43902	-	10.1624	6.22367	4.26185
1	7371289	7371857	hen2-2_vs_col-0	2.04504	+	136.524	3.92794	2.13011
1	7372248	7372532	hen2-2_vs_col-0	1.33882	+	285.1	2.47651	1.30445
1	7372610	7372959	hen2-2_vs_col-0	1.3537	+	224.408	2.68779	1.41722
1	7373543	7373673	hen2-2_vs_col-0	1.4003	+	245.847	1.99599	1.01248
1	7373762	7374275	hen2-2_vs_col-0	1.45475	+	243.933	3.15597	1.66748
1	7399016	7399368	hen2-2_vs_col-0	3.55947	+	4.61696	3.2014	1.68967
1	7428749	7428857	hen2-2_vs_col-0	1.68264	-	5.10682	1.99746	1.02624
1	7443615	7443659	hen2-2_vs_col-0	inf	-	3.17937	2.04541	1.06102
1	7445102	7445291	hen2-2_vs_col-0	-1.05408	+	34.9541	1.98427	1.00497
1	7453678	7453805	hen2-2_vs_col-0	1.4232	-	126.759	1.95982	1.00113
1	7481202	7481606	hen2-2_vs_col-0	1.96092	-	9.51781	5.26943	3.43459
1	7481628	7481735	hen2-2_vs_col-0	1.4782	+	8.65873	2.25137	1.16968
1	7481918	7482107	hen2-2_vs_col-0	1.55965	+	8.59173	2.10333	1.07823
1	7483202	7483436	hen2-2_vs_col-0	1.26026	+	14.6198	2.38331	1.24125
1	7489355	7489522	hen2-2_vs_col-0	3.53912	+	4.39073	3.27774	1.74039
1	7493765	7494084	hen2-2_vs_col-0	5.44039	-	7.59554	6.22367	4.26185
1	7507076	7507511	hen2-2_vs_col-0	6.65213	-	7.17218	6.22367	4.26185
1	7610644	7612553	hen2-2_vs_col-0	1.23902	-	15.7545	6.22367	4.26185
1	7623912	7623962	hen2-2_vs_col-0	1.99924	-	6.66387	2.72138	1.51385
1	7661475	7661789	hen2-2_vs_col-0	2.12678	+	6.56871	3.12476	1.6509
1	7715171	7715384	hen2-2_vs_col-0	5.65943	+	3.83645	2.19053	1.13435
1	7768052	7768341	hen2-2_vs_col-0	1.44099	+	22.0369	2.68469	1.41537
1	7785788	7786210	hen2-2_vs_col-0	1.31325	+	32.7291	2.65595	1.4013
1	7814272	7815491	hen2-2_vs_col-0	3.62726	+	9.36241	5.13452	2.69636
1	7836822	7836954	hen2-2_vs_col-0	1.40703	-	5.53867	2.02383	1.04516
1	7886827	7887615	hen2-2_vs_col-0	1.27614	-	42.2307	4.42433	2.75317
1	7887641	7887708	hen2-2_vs_col-0	1.48625	-	6.46113	2.01774	1.04076
1	7888043	7888699	hen2-2_vs_col-0	2.01192	-	11.2281	6.22367	4.26185
1	7896382	7897019	hen2-2_vs_col-0	1.02084	-	69.438	5.74655	3.87113
1	7896849	7897585	hen2-2_vs_col-0	2.35401	+	11.3505	4.05206	2.18474
1	7897569	7897671	hen2-2_vs_col-0	1.21021	-	9.64702	2.74814	1.53162
1	7898152	7898312	hen2-2_vs_col-0	1.49227	+	5.18367	2.36966	1.23359
1	7898555	7898710	hen2-2_vs_col-0	1.43317	+	6.36218	2.21597	1.14788
1	7898763	7900074	hen2-2_vs_col-0	1.74158	+	20.5997	4.63184	2.55548
1	7900355	7901624	hen2-2_vs_col-0	2.98315	+	8.19623	5.33081	2.69636
1	7901137	7901585	hen2-2_vs_col-0	2.82279	-	9.51925	6.22367	4.26185
1	7901696	7901970	hen2-2_vs_col-0	4.13222	+	4.8	3.32039	1.75683
1	7902195	7902309	hen2-2_vs_col-0	1.80504	-	5.73106	2.13827	1.12114
1	7904022	7905283	hen2-2_vs_col-0	3.35078	+	6.25849	4.89716	2.64669
1	7905467	7905600	hen2-2_vs_col-0	4.78434	+	3.88166	2.34168	1.22176
1	7906414	7906549	hen2-2_vs_col-0	2.13543	+	4.56933	2.71486	1.43425
1	7913938	7914038	hen2-2_vs_col-0	3.21074	-	3.51132	3.28166	1.90802
1	7933171	7933438	hen2-2_vs_col-0	1.92657	+	5.42857	2.58318	1.36348
1	7939091	7939251	hen2-2_vs_col-0	1.48549	+	5.17924	2.19089	1.13435
1	7939272	7939682	hen2-2_vs_col-0	2.6575	+	4.89451	3.12942	1.6509
1	7940003	7940813	hen2-2_vs_col-0	2.15746	+	11.4161	3.66941	1.98957
1	7991114	7991141	hen2-2_vs_col-0	4.38781	-	3.41327	2.28751	1.22033
1	7991145	7991644	hen2-2_vs_col-0	5.26712	-	9.52729	6.22367	4.26185
1	8003462	8004176	hen2-2_vs_col-0	3.9465	-	8.34655	6.22367	4.26185
1	8005981	8006191	hen2-2_vs_col-0	1.54086	+	10.3896	2.50595	1.32055
1	8006613	8006757	hen2-2_vs_col-0	1.27081	-	6.37537	2.08181	1.08576
1	8006840	8007212	hen2-2_vs_col-0	1.24371	-	13.6155	3.78434	2.26209
1	8010017	8010759	hen2-2_vs_col-0	5.41942	-	10.1976	6.22367	4.26185
1	8010028	8010129	hen2-2_vs_col-0	8.65153	+	4.23459	3.01906	1.59839
1	8010243	8010563	hen2-2_vs_col-0	5.70842	+	4.6482	3.45741	1.84604
1	8010609	8010727	hen2-2_vs_col-0	inf	+	3.66086	2.80429	1.48637
1	8010737	8010927	hen2-2_vs_col-0	inf	+	3.92446	3.30143	1.74758
1	8011293	8011335	hen2-2_vs_col-0	inf	+	3.41528	2.23865	1.16028
1	8011338	8011400	hen2-2_vs_col-0	inf	+	3.12472	2.29049	1.19035
1	8011841	8012003	hen2-2_vs_col-0	5.69394	-	4.2546	4.04469	2.45724
1	8014141	8014523	hen2-2_vs_col-0	2.97084	+	4.93267	3.48131	1.85887
1	8046357	8048808	hen2-2_vs_col-0	2.92561	-	8.43166	6.22367	4.26185
1	8063508	8063645	hen2-2_vs_col-0	1.05255	+	13.7479	2.02421	1.02834
1	8098389	8098505	hen2-2_vs_col-0	4.52799	+	3.11538	2.00223	1.01586
1	8105345	8105458	hen2-2_vs_col-0	3.00309	-	3.29386	2.22146	1.17617
1	8105513	8105741	hen2-2_vs_col-0	1.83477	-	9.14286	3.8345	2.29659
1	8105792	8106531	hen2-2_vs_col-0	2.33969	-	9.39073	6.22367	4.26185
1	8139183	8139307	hen2-2_vs_col-0	1.07892	+	44.14	2.00792	1.01797
1	8144118	8144209	hen2-2_vs_col-0	1.63821	-	5.03882	2.5382	1.38802
1	8144695	8144860	hen2-2_vs_col-0	2.31711	-	4.3253	3.6543	2.17582
1	8147275	8147514	hen2-2_vs_col-0	1.22066	-	6.13869	3.3288	1.939
1	8152759	8153545	hen2-2_vs_col-0	5.74236	+	13.4526	5.13452	2.69636
1	8153889	8154436	hen2-2_vs_col-0	2.69859	+	4.56413	3.51981	1.88459
1	8154999	8155638	hen2-2_vs_col-0	2.73093	+	9.81027	4.02669	2.18474
1	8164861	8164956	hen2-2_vs_col-0	1.00012	+	25.9301	2.03112	1.0326
1	8165362	8165857	hen2-2_vs_col-0	4.7267	-	13.2719	6.22367	4.26185
1	8165617	8165826	hen2-2_vs_col-0	1.65606	+	8.2	2.47116	1.30234
1	8181624	8182132	hen2-2_vs_col-0	2.83628	+	7.0529	3.8123	2.07508
1	8297995	8298247	hen2-2_vs_col-0	1.57053	-	6.08075	3.62928	2.16022
1	8298469	8298669	hen2-2_vs_col-0	1.73618	-	7.3177	3.65664	2.17692
1	8298675	8298812	hen2-2_vs_col-0	3.44369	-	2.73033	1.97284	1.00981
1	8298818	8299200	hen2-2_vs_col-0	1.68905	-	7.81388	4.22804	2.59884
1	8299446	8299783	hen2-2_vs_col-0	1.25281	-	9.6623	3.82055	2.28367
1	8299905	8300614	hen2-2_vs_col-0	1.40817	-	12.1994	4.99322	3.2165
1	8300695	8301664	hen2-2_vs_col-0	1.82175	-	13.0997	6.22367	4.26185
1	8310630	8311780	hen2-2_vs_col-0	5.96114	-	68.9163	6.22367	4.26185
1	8311479	8312406	hen2-2_vs_col-0	2.3822	+	22.9049	5.06197	2.69636
1	8312422	8312755	hen2-2_vs_col-0	1.22309	+	19.9162	2.70243	1.42685
1	8312766	8313297	hen2-2_vs_col-0	1.43066	+	10.6807	3.08005	1.62617
1	8345723	8345829	hen2-2_vs_col-0	1.42843	+	9.93858	2.0417	1.03917
1	8351524	8351630	hen2-2_vs_col-0	3.97737	-	2.78438	2.14707	1.12741
1	8351632	8351820	hen2-2_vs_col-0	4.06136	-	3.7517	3.22498	1.86929
1	8351828	8352183	hen2-2_vs_col-0	3.46364	-	5.41493	3.42779	2.01159
1	8462655	8462736	hen2-2_vs_col-0	-2.13159	+	4.84756	2.14229	1.10075
1	8524966	8525208	hen2-2_vs_col-0	1.532	-	166.876	6.22367	4.26185
1	8539995	8540193	hen2-2_vs_col-0	inf	-	5.2107	4.48331	2.77721
1	8541276	8541760	hen2-2_vs_col-0	2.75312	-	9.05405	5.04758	3.25819
1	8543149	8543209	hen2-2_vs_col-0	4.19442	-	3.30094	2.30822	1.23313
1	8544630	8545012	hen2-2_vs_col-0	1.27395	+	39.4978	2.78304	1.47474
1	8560633	8560749	hen2-2_vs_col-0	2.67654	+	4.37363	2.59624	1.37129
1	8631552	8631725	hen2-2_vs_col-0	1.76024	+	12.6133	2.33788	1.22066
1	8632819	8633078	hen2-2_vs_col-0	1.09077	+	18.1791	2.34321	1.22241
1	8650752	8650825	hen2-2_vs_col-0	2.79167	-	3.33494	2.39688	1.28961
1	8650841	8650882	hen2-2_vs_col-0	3.52519	-	3.27721	2.20087	1.16279
1	8658144	8659506	hen2-2_vs_col-0	1.5255	-	10.6607	6.22367	4.26185
1	8709271	8709573	hen2-2_vs_col-0	6.77579	-	4.61386	4.22804	2.59884
1	8712343	8712463	hen2-2_vs_col-0	3.78321	+	3.45218	2.44264	1.28372
1	8712635	8712724	hen2-2_vs_col-0	inf	+	3.27778	2.40381	1.25709
1	8720034	8720841	hen2-2_vs_col-0	1.67489	-	29.2049	6.22367	4.26185
1	8755495	8756600	hen2-2_vs_col-0	4.03424	-	235.477	6.22367	4.26185
1	8775900	8776178	hen2-2_vs_col-0	1.26298	+	701.567	2.57636	1.36019
1	8777828	8778027	hen2-2_vs_col-0	1.11761	+	319.776	2.20172	1.13985
1	8798375	8798667	hen2-2_vs_col-0	1.45508	+	653.145	2.54194	1.34095
1	8812801	8813084	hen2-2_vs_col-0	1.26612	+	156.731	2.54906	1.34428
1	8827099	8827462	hen2-2_vs_col-0	1.42179	+	677.937	2.86183	1.51519
1	8828297	8828601	hen2-2_vs_col-0	1.41427	+	858.865	2.75877	1.46188
1	8829112	8829328	hen2-2_vs_col-0	1.36699	+	757.726	2.2117	1.14586
1	8841410	8841653	hen2-2_vs_col-0	2.78259	+	5.22775	2.93611	1.55229
1	8844046	8844148	hen2-2_vs_col-0	2.07161	+	4.27254	1.98032	1.00134
1	8861494	8861588	hen2-2_vs_col-0	5.21852	-	3.44962	3.671	2.18218
1	8864276	8864629	hen2-2_vs_col-0	6.1119	-	5.69108	6.22367	4.26185
1	8923728	8923963	hen2-2_vs_col-0	3.4794	-	6.11713	4.34861	2.68781
1	8923956	8924147	hen2-2_vs_col-0	1.20694	+	13.8456	2.34449	1.22281
1	8927684	8928112	hen2-2_vs_col-0	2.78411	-	4.25008	4.42433	2.75317
1	8928222	8928364	hen2-2_vs_col-0	2.53084	-	3.75524	2.19759	1.16171
1	8928400	8928454	hen2-2_vs_col-0	3.37785	-	3.74416	2.44574	1.32292
1	8928484	8929519	hen2-2_vs_col-0	3.35797	-	5.22925	6.22367	4.26185
1	8929562	8930060	hen2-2_vs_col-0	3.08775	-	5.99127	5.74655	3.87113
1	8930135	8930542	hen2-2_vs_col-0	3.53709	-	6.0702	6.22367	4.26185
1	8930614	8931234	hen2-2_vs_col-0	3.07063	-	5.73556	6.22367	4.26185
1	8931299	8932566	hen2-2_vs_col-0	2.65546	-	7.22972	6.22367	4.26185
1	8932586	8932807	hen2-2_vs_col-0	2.12781	-	5.55888	3.51018	2.06918
1	8932814	8933138	hen2-2_vs_col-0	2.16459	-	6.20044	4.5902	2.86552
1	8933418	8933579	hen2-2_vs_col-0	5.62353	+	6.72002	3.2126	1.6943
1	8933582	8934101	hen2-2_vs_col-0	3.45394	+	13.3166	4.46834	2.41524
1	8951311	8951402	hen2-2_vs_col-0	1.43993	+	23.5815	2.17822	1.1255
1	8975101	8975712	hen2-2_vs_col-0	2.59303	-	16.0219	5.04758	3.25819
1	8977252	8978231	hen2-2_vs_col-0	2.20763	-	52.6238	6.22367	4.26185
1	8978785	8979180	hen2-2_vs_col-0	5.85106	-	4.8088	5.26943	3.43459
1	8979370	8979967	hen2-2_vs_col-0	3.34534	+	33.6028	4.363	2.36315
1	8980078	8980539	hen2-2_vs_col-0	4.45843	+	6.75541	4.04558	2.18474
1	8980580	8980783	hen2-2_vs_col-0	10.536	+	4.16176	3.17288	1.67474
1	8983964	8984213	hen2-2_vs_col-0	3.66872	+	3.35486	2.56749	1.35406
1	9030347	9030899	hen2-2_vs_col-0	4.08623	+	11.044	4.68455	2.60014
1	9030992	9031207	hen2-2_vs_col-0	1.06395	+	10.5413	2.48829	1.31116
1	9031402	9031593	hen2-2_vs_col-0	1.32539	+	9.11198	2.33788	1.22066
1	9031603	9031903	hen2-2_vs_col-0	1.7167	+	7.59302	2.67912	1.41166
1	9033328	9033460	hen2-2_vs_col-0	1.16097	+	13.457	2.30487	1.19967
1	9042561	9043847	hen2-2_vs_col-0	2.05421	-	73.1012	6.22367	4.26185
1	9060615	9060709	hen2-2_vs_col-0	1.39098	-	5.86692	2.46772	1.33792
1	9060721	9060878	hen2-2_vs_col-0	1.49697	-	8.31374	3.28665	1.91054
1	9066465	9067301	hen2-2_vs_col-0	1.15949	-	55.2557	6.22367	4.26185
1	9066919	9067240	hen2-2_vs_col-0	1.62755	+	13.3239	2.77503	1.46944
1	9067381	9068745	hen2-2_vs_col-0	1.35576	-	71.294	6.22367	4.26185
1	9069022	9069136	hen2-2_vs_col-0	1.27136	-	14.7857	2.97545	1.69674
1	9069434	9069523	hen2-2_vs_col-0	1.3166	-	13.3897	2.84473	1.60163
1	9069546	9069819	hen2-2_vs_col-0	1.23954	-	5.57899	3.7568	2.24194
1	9069714	9069866	hen2-2_vs_col-0	5.75212	+	4.45938	2.80429	1.48637
1	9069821	9070935	hen2-2_vs_col-0	1.49759	-	9.32902	6.22367	4.26185
1	9069870	9069969	hen2-2_vs_col-0	4.34826	+	3.77	2.43991	1.28325
1	9071858	9075712	hen2-2_vs_col-0	3.03983	+	20.5728	6.17591	3.10351
1	9075518	9076748	hen2-2_vs_col-0	2.6613	-	62.266	6.22367	4.26185
1	9145651	9145984	hen2-2_vs_col-0	1.07114	-	63.2156	4.42433	2.75317
1	9165692	9165811	hen2-2_vs_col-0	1.18757	-	8.36786	2.12527	1.11372
1	9170505	9170625	hen2-2_vs_col-0	1.05695	-	6.52656	2.19751	1.16171
1	9184579	9185764	hen2-2_vs_col-0	1.50179	+	333.462	3.56419	1.91578
1	9185877	9187505	hen2-2_vs_col-0	1.46197	+	432.162	3.87706	2.0957
1	9186330	9186462	hen2-2_vs_col-0	3.05215	-	6.16971	2.91682	1.65505
1	9241211	9241963	hen2-2_vs_col-0	1.48127	+	12.907	3.50846	1.87754
1	9243495	9243599	hen2-2_vs_col-0	1.67281	+	10.6646	2.01704	1.02316
1	9285038	9285345	hen2-2_vs_col-0	2.16889	+	6.53571	2.7692	1.46631
1	9285347	9285741	hen2-2_vs_col-0	1.66846	+	15.5112	3.29682	1.7465
1	9286546	9286780	hen2-2_vs_col-0	2.70084	+	6.29787	2.89922	1.53182
1	9321737	9321924	hen2-2_vs_col-0	1.83123	+	6.67135	2.30921	1.20274
1	9323367	9323445	hen2-2_vs_col-0	11.4691	-	2.5642	2.13099	1.11744
1	9323522	9323895	hen2-2_vs_col-0	5.10231	-	3.66616	5.5247	3.67004
1	9326827	9326874	hen2-2_vs_col-0	4.33696	-	3.31399	2.85912	1.61077
1	9328143	9328194	hen2-2_vs_col-0	inf	-	3.04396	2.50809	1.36647
1	9328269	9328570	hen2-2_vs_col-0	6.9836	-	4.85714	5.18228	3.36736
1	9329696	9329890	hen2-2_vs_col-0	1.50823	-	6.32601	2.9945	1.71009
1	9329895	9330557	hen2-2_vs_col-0	3.19846	-	10.4013	6.22367	4.26185
1	9330869	9331379	hen2-2_vs_col-0	5.18001	-	13.669	6.22367	4.26185
1	9330881	9331343	hen2-2_vs_col-0	3.94249	+	12.7396	4.25683	2.32773
1	9331408	9331634	hen2-2_vs_col-0	4.05559	-	7.22782	5.74655	3.87113
1	9331479	9331615	hen2-2_vs_col-0	5.79174	+	4.14599	2.75283	1.45924
1	9344648	9344688	hen2-2_vs_col-0	6.51785	-	3.55052	3.14196	1.81157
1	9352156	9352318	hen2-2_vs_col-0	1.35323	+	38.2651	2.47426	1.30445
1	9352332	9352405	hen2-2_vs_col-0	4.73985	-	2.67568	2.41029	1.29667
1	9352427	9352466	hen2-2_vs_col-0	inf	-	2.98214	2.33656	1.25007
1	9356916	9357106	hen2-2_vs_col-0	4.38412	-	3.57592	3.53972	2.08789
1	9357109	9357288	hen2-2_vs_col-0	3.66047	-	4.03929	4.30459	2.65459
1	9410169	9410216	hen2-2_vs_col-0	5.63421	+	3.61905	2.18686	1.13225
1	9410254	9410644	hen2-2_vs_col-0	3.05147	+	5.57198	3.48307	1.85887
1	9441065	9446205	hen2-2_vs_col-0	2.36583	-	14.2763	6.22367	4.26185
1	9455467	9455557	hen2-2_vs_col-0	4.70577	+	3.3179	2.3628	1.23133
1	9456671	9457330	hen2-2_vs_col-0	2.43811	+	26.6255	4.07211	2.19131
1	9457706	9458001	hen2-2_vs_col-0	1.31374	+	10.7276	2.53493	1.33707
1	9480352	9480389	hen2-2_vs_col-0	2.56593	-	4.63158	2.06102	1.07083
1	9480446	9481217	hen2-2_vs_col-0	3.57232	-	6.74473	6.22367	4.26185
1	9480646	9480772	hen2-2_vs_col-0	3.6467	+	3.69685	2.81024	1.48668
1	9482122	9482922	hen2-2_vs_col-0	4.76282	-	55.8384	6.22367	4.26185
1	9501164	9501375	hen2-2_vs_col-0	1.17388	+	7.93969	2.60061	1.37274
1	9507648	9507861	hen2-2_vs_col-0	3.05095	+	4.96929	2.20944	1.14461
1	9520069	9520357	hen2-2_vs_col-0	1.13107	+	13.1369	2.51934	1.32723
1	9565965	9566151	hen2-2_vs_col-0	-1.0263	-	35.4079	2.43416	1.31357
1	9592146	9592465	hen2-2_vs_col-0	1.05431	+	83.0145	2.46066	1.29332
1	9593689	9594759	hen2-2_vs_col-0	1.56532	+	76.5678	4.25683	2.32773
1	9611211	9611446	hen2-2_vs_col-0	1.32133	+	21.5042	2.62703	1.39151
1	9625146	9625857	hen2-2_vs_col-0	3.22908	-	16.1449	6.22367	4.26185
1	9626156	9626272	hen2-2_vs_col-0	3.12009	+	3.6221	2.23574	1.15908
1	9627509	9627774	hen2-2_vs_col-0	1.91811	+	15.634	3.01544	1.59713
1	9628479	9628644	hen2-2_vs_col-0	1.81606	-	5.69234	2.27025	1.20895
1	9628521	9628743	hen2-2_vs_col-0	1.69527	+	8.08712	2.34385	1.22261
1	9647571	9647994	hen2-2_vs_col-0	1.32103	-	10.2136	3.62928	2.16022
1	9668997	9669096	hen2-2_vs_col-0	1.56231	+	8.51929	2.09525	1.07206
1	9676156	9676274	hen2-2_vs_col-0	1.64368	-	11.3241	2.92026	1.6574
1	9728565	9728645	hen2-2_vs_col-0	1.14574	-	107.46	3.12158	1.7996
1	9729600	9729749	hen2-2_vs_col-0	1.06368	-	88.9214	3.5525	2.09685
1	9740913	9741040	hen2-2_vs_col-0	3.34875	-	4.15792	3.11274	1.79369
1	9741046	9741581	hen2-2_vs_col-0	4.49036	-	5.57196	6.22367	4.26185
1	9747836	9747922	hen2-2_vs_col-0	2.97386	-	3.99918	2.34303	1.25481
1	9748346	9748742	hen2-2_vs_col-0	2.46951	+	10.2972	3.48131	1.85887
1	9752696	9753008	hen2-2_vs_col-0	1.35915	-	18.2506	3.91192	2.35561
1	9753101	9753389	hen2-2_vs_col-0	1.09637	-	16.8085	4.02777	2.44433
1	9777613	9777767	hen2-2_vs_col-0	1.23962	-	11.7323	2.25161	1.19695
1	9789782	9790426	hen2-2_vs_col-0	1.59249	+	7.85172	3.32896	1.76047
1	9790907	9791122	hen2-2_vs_col-0	2.99031	+	4.14484	2.63948	1.39609
1	9830243	9830351	hen2-2_vs_col-0	4.33092	-	3.7654	3.70647	2.20836
1	9830666	9830854	hen2-2_vs_col-0	2.98381	-	3.96032	2.80322	1.57171
1	9830894	9830995	hen2-2_vs_col-0	3.12264	-	4.78011	3.35035	1.95423
1	9831433	9831530	hen2-2_vs_col-0	2.68459	-	3.77405	2.35029	1.25877
1	9831658	9831835	hen2-2_vs_col-0	3.39143	+	4.27087	2.73109	1.44535
1	9831760	9831918	hen2-2_vs_col-0	1.4102	-	5.03639	2.76746	1.545
1	9886195	9886905	hen2-2_vs_col-0	4.39838	+	19.794	4.81418	2.60348
1	9890625	9890856	hen2-2_vs_col-0	1.01747	-	28.2026	2.98237	1.70139
1	9910830	9911074	hen2-2_vs_col-0	3.72449	-	3.94636	5.04758	3.25819
1	9911085	9913638	hen2-2_vs_col-0	1.04083	-	45.5659	6.22367	4.26185
1	9912329	9912590	hen2-2_vs_col-0	3.03255	+	4.18321	3.00127	1.59077
1	9934885	9935040	hen2-2_vs_col-0	1.56488	+	4.85027	2.04619	1.04265
1	9935518	9935617	hen2-2_vs_col-0	2.63251	+	3.94	2.06563	1.05454
1	9956234	9956541	hen2-2_vs_col-0	1.01544	-	24.2549	2.87284	1.62343
1	9956543	9956927	hen2-2_vs_col-0	1.07263	-	38.6302	3.26036	1.8944
1	9968036	9968245	hen2-2_vs_col-0	1.00177	-	12.451	3.25565	1.89108
1	9972298	9973794	hen2-2_vs_col-0	1.03433	-	605.015	6.22367	4.26185
1	9979323	9979676	hen2-2_vs_col-0	1.36397	-	12.0862	4.30459	2.65459
1	9979392	9979606	hen2-2_vs_col-0	1.58931	+	11.7661	2.89511	1.53182
1	10029268	10029673	hen2-2_vs_col-0	2.32093	+	97.5735	3.5179	1.88411
1	10091004	10091043	hen2-2_vs_col-0	2.38925	-	4.24464	2.23205	1.1831
1	10097214	10097379	hen2-2_vs_col-0	1.04421	-	7.1562	2.36459	1.26776
1	10097696	10097834	hen2-2_vs_col-0	1.06532	-	6.26156	2.54927	1.39465
1	10103147	10103312	hen2-2_vs_col-0	1.36974	+	13.9036	2.18535	1.1315
1	10124521	10124772	hen2-2_vs_col-0	1.28745	-	6.97166	3.10806	1.79077
1	10124880	10124983	hen2-2_vs_col-0	1.17369	-	10.6442	1.99386	1.02432
1	10125254	10125509	hen2-2_vs_col-0	1.03002	-	9.60658	3.12296	1.79984
1	10125835	10126016	hen2-2_vs_col-0	1.19397	-	9.5989	2.9281	1.66306
1	10126236	10126396	hen2-2_vs_col-0	1.49141	-	9.48004	2.37888	1.27693
1	10126485	10126595	hen2-2_vs_col-0	1.38261	-	11.37	2.44966	1.32526
1	10126637	10126787	hen2-2_vs_col-0	1.18034	-	9.43425	2.5723	1.41275
1	10126789	10126895	hen2-2_vs_col-0	1.00638	-	10.8745	2.03652	1.05471
1	10137905	10138022	hen2-2_vs_col-0	1.06481	-	9.65375	2.40776	1.29491
1	10143886	10144107	hen2-2_vs_col-0	5.60852	-	4.58172	5.74655	3.87113
1	10144120	10144137	hen2-2_vs_col-0	inf	-	3.60317	2.05408	1.06623
1	10144156	10144247	hen2-2_vs_col-0	inf	+	2.6809	2.06054	1.05054
1	10144526	10144994	hen2-2_vs_col-0	5.6887	-	6.99071	6.22367	4.26185
1	10151199	10151784	hen2-2_vs_col-0	3.22969	-	60.0786	6.22367	4.26185
1	10183668	10184059	hen2-2_vs_col-0	1.0131	-	9.25656	3.47009	2.04127
1	10194301	10194372	hen2-2_vs_col-0	3.33049	+	3.68651	1.99012	1.00867
1	10223285	10223545	hen2-2_vs_col-0	4.9232	+	4.09989	3.33144	1.76047
1	10258233	10258352	hen2-2_vs_col-0	1.13337	-	5.55476	2.16551	1.1388
1	10274019	10275219	hen2-2_vs_col-0	1.22889	-	103.51	6.22367	4.26185
1	10275294	10275714	hen2-2_vs_col-0	1.33824	-	128.56	6.22367	4.26185
1	10283579	10283705	hen2-2_vs_col-0	1.19728	-	8.20304	2.90582	1.64623
1	10288262	10288754	hen2-2_vs_col-0	4.03562	+	7.12185	3.69447	1.99061
1	10300227	10300369	hen2-2_vs_col-0	1.60297	+	171.757	2.00521	1.01743
1	10302239	10303283	hen2-2_vs_col-0	4.84193	+	17.1949	5.13452	2.69636
1	10303319	10303700	hen2-2_vs_col-0	3.83921	-	13.2567	6.22367	4.26185
1	10303604	10304659	hen2-2_vs_col-0	3.78826	+	6.29857	4.77797	2.60014
1	10305084	10305342	hen2-2_vs_col-0	1.82657	-	28.9945	5.5247	3.67004
1	10305565	10307168	hen2-2_vs_col-0	3.50038	+	20.4694	5.69879	2.69894
1	10306479	10307073	hen2-2_vs_col-0	3.21769	-	19.8441	6.22367	4.26185
1	10307175	10307693	hen2-2_vs_col-0	2.8604	+	5.70823	3.83547	2.07508
1	10308552	10308812	hen2-2_vs_col-0	1.29136	+	653.515	2.34835	1.22578
1	10308815	10309275	hen2-2_vs_col-0	1.6699	+	234.431	3.07245	1.62141
1	10309791	10310320	hen2-2_vs_col-0	1.82352	+	12.3935	3.70904	2.00008
1	10320243	10320674	hen2-2_vs_col-0	4.63424	-	11.9901	6.22367	4.26185
1	10320968	10321222	hen2-2_vs_col-0	1.83828	+	15.4924	3.15266	1.6652
1	10321608	10322312	hen2-2_vs_col-0	4.91124	-	23.4581	6.22367	4.26185
1	10322397	10322549	hen2-2_vs_col-0	2.34871	+	9.08077	2.93611	1.55229
1	10373048	10373180	hen2-2_vs_col-0	2.8443	-	3.62943	2.79118	1.56296
1	10373263	10373688	hen2-2_vs_col-0	3.20125	-	4.07629	5.74655	3.87113
1	10387296	10387370	hen2-2_vs_col-0	1.79251	-	12.9971	2.18565	1.15308
1	10393885	10394027	hen2-2_vs_col-0	-1.74662	-	7.81069	2.23712	1.18725
1	10406872	10406943	hen2-2_vs_col-0	1.97231	-	4.68948	2.77358	1.54862
1	10407485	10407620	hen2-2_vs_col-0	2.75273	+	4.82931	2.48812	1.31116
1	10407665	10407882	hen2-2_vs_col-0	3.06864	+	3.92267	2.6461	1.39741
1	10407818	10407976	hen2-2_vs_col-0	1.06441	-	9.07951	2.7418	1.52695
1	10419720	10420330	hen2-2_vs_col-0	1.14779	-	11.5148	5.5247	3.67004
1	10463238	10463358	hen2-2_vs_col-0	1.30489	+	6.38607	2.11224	1.08409
1	10472047	10472207	hen2-2_vs_col-0	1.44642	+	29.8487	2.54437	1.34226
1	10473522	10474480	hen2-2_vs_col-0	6.71294	+	28.7599	5.33081	2.69636
1	10473725	10473938	hen2-2_vs_col-0	2.36102	-	4.65421	3.31787	1.9299
1	10473964	10474308	hen2-2_vs_col-0	1.71565	-	11.9592	3.9565	2.39207
1	10477432	10477575	hen2-2_vs_col-0	inf	-	4.81895	5.74655	3.87113
1	10491834	10491945	hen2-2_vs_col-0	2.10768	+	12.3233	2.27779	1.18673
1	10492160	10492434	hen2-2_vs_col-0	1.13706	+	16.0091	2.61684	1.38386
1	10501893	10502045	hen2-2_vs_col-0	5.27146	-	4.14379	5.74655	3.87113
1	10502060	10502164	hen2-2_vs_col-0	5.27059	-	3.58299	3.8345	2.29659
1	10502176	10502188	hen2-2_vs_col-0	3.85505	-	4.33516	2.38413	1.28104
1	10502354	10502435	hen2-2_vs_col-0	4.36372	-	2.7831	2.08908	1.09038
1	10502558	10502975	hen2-2_vs_col-0	1.51141	-	32.1719	6.22367	4.26185
1	10505372	10505583	hen2-2_vs_col-0	2.6391	-	4.50135	3.45949	2.03346
1	10505824	10505854	hen2-2_vs_col-0	1.76166	-	5.3318	2.62042	1.44464
1	10552741	10552868	hen2-2_vs_col-0	1.44455	-	4.39676	1.97789	1.01291
1	10582456	10582680	hen2-2_vs_col-0	1.19232	+	8.38508	2.20645	1.14381
1	10647152	10647290	hen2-2_vs_col-0	1.64526	-	5.84841	2.4075	1.29491
1	10651040	10651184	hen2-2_vs_col-0	1.05342	-	8.65517	2.30069	1.22807
1	10651224	10651633	hen2-2_vs_col-0	1.65079	-	11.4176	5.10973	3.31757
1	10668691	10670257	hen2-2_vs_col-0	2.0625	-	12.9531	6.22367	4.26185
1	10677636	10678233	hen2-2_vs_col-0	4.14243	-	16.0391	6.22367	4.26185
1	10677768	10678407	hen2-2_vs_col-0	5.08185	+	14.1301	4.89716	2.64669
1	10715574	10715689	hen2-2_vs_col-0	1.1075	+	43.4415	2.07489	1.05953
1	10722786	10723402	hen2-2_vs_col-0	3.21328	-	19.3823	6.22367	4.26185
1	10779462	10779669	hen2-2_vs_col-0	1.0059	+	21.6628	2.08162	1.06368
1	10789899	10790070	hen2-2_vs_col-0	1.59978	-	6.21387	4.01148	2.43597
1	10840241	10840477	hen2-2_vs_col-0	1.21667	+	40.2939	2.53993	1.34047
1	10840266	10840497	hen2-2_vs_col-0	2.08029	-	5.49938	3.64964	2.17484
1	10840504	10841051	hen2-2_vs_col-0	1.51221	+	21.2298	3.27994	1.74039
1	10861046	10861261	hen2-2_vs_col-0	1.28749	+	15.6872	2.20776	1.14434
1	10893687	10893857	hen2-2_vs_col-0	1.13143	+	21.1571	2.12065	1.0892
1	10906063	10906134	hen2-2_vs_col-0	4.46772	+	3.25794	2.15942	1.11233
1	10919388	10919583	hen2-2_vs_col-0	1.17695	+	11.5703	2.16881	1.11759
1	10919821	10920033	hen2-2_vs_col-0	1.66629	+	10.7485	2.16135	1.11351
1	10941151	10941480	hen2-2_vs_col-0	4.64419	+	11.7532	3.91346	2.11981
1	10947915	10949179	hen2-2_vs_col-0	2.97017	+	18.7883	5.06197	2.69636
1	10967938	10968273	hen2-2_vs_col-0	1.10064	+	91.6531	2.49986	1.31701
1	10968504	10968875	hen2-2_vs_col-0	1.47079	+	44.4996	2.88477	1.52912
1	11017878	11017947	hen2-2_vs_col-0	1.08633	-	6.4602	2.12086	1.11147
1	11018331	11018510	hen2-2_vs_col-0	1.40516	-	5.04127	2.6274	1.44961
1	11018722	11018965	hen2-2_vs_col-0	1.26303	-	7.10656	3.18188	1.83985
1	11040305	11041258	hen2-2_vs_col-0	1.01526	-	144.589	6.22367	4.26185
1	11041606	11042016	hen2-2_vs_col-0	1.03752	-	202.573	4.76127	3.01635
1	11042848	11042948	hen2-2_vs_col-0	1.10685	-	159.744	3.24732	1.88413
1	11107631	11108066	hen2-2_vs_col-0	1.31169	-	44.625	5.18228	3.36736
1	11123994	11124071	hen2-2_vs_col-0	1.67978	-	9.97436	2.44864	1.32464
1	11137303	11137455	hen2-2_vs_col-0	inf	-	3.38842	3.68085	2.18833
1	11137345	11139672	hen2-2_vs_col-0	1.45741	+	171.976	4.42004	2.40315
1	11137651	11138217	hen2-2_vs_col-0	5.73755	-	6.51877	6.22367	4.26185
1	11138541	11138643	hen2-2_vs_col-0	1.88877	-	5.29681	2.19701	1.16138
1	11163944	11164686	hen2-2_vs_col-0	1.13592	-	14.4813	5.74655	3.87113
1	11164204	11164329	hen2-2_vs_col-0	1.77726	+	5.24603	2.10274	1.07815
1	11164462	11164554	hen2-2_vs_col-0	2.81565	+	3.51997	2.43045	1.27697
1	11164690	11165019	hen2-2_vs_col-0	1.52879	-	11.1652	4.01148	2.43597
1	11190105	11190519	hen2-2_vs_col-0	3.02876	-	4.6105	5.10973	3.31757
1	11199613	11199811	hen2-2_vs_col-0	1.00435	-	17.3424	2.77822	1.55252
1	11199826	11200088	hen2-2_vs_col-0	1.03972	-	14.7455	3.15363	1.81865
1	11216298	11217082	hen2-2_vs_col-0	3.07369	+	17.4929	4.71351	2.60014
1	11221365	11221458	hen2-2_vs_col-0	1.07376	-	7.01672	1.99823	1.0266
1	11255510	11255723	hen2-2_vs_col-0	1.50148	-	7.75601	3.74223	2.23366
1	11299879	11300147	hen2-2_vs_col-0	4.13279	+	5.14525	3.18513	1.68022
1	11300076	11300878	hen2-2_vs_col-0	4.32233	-	10.3776	6.22367	4.26185
1	11300242	11300437	hen2-2_vs_col-0	5.13609	+	3.90124	2.70624	1.4294
1	11300547	11300637	hen2-2_vs_col-0	5.85561	+	2.91287	2.23664	1.15918
1	11300919	11300993	hen2-2_vs_col-0	3.23462	+	3.58	2.21682	1.14788
1	11310551	11310986	hen2-2_vs_col-0	4.79708	+	4.72313	3.82373	2.07508
1	11310591	11311130	hen2-2_vs_col-0	4.25181	-	6.4795	6.22367	4.26185
1	11311315	11311707	hen2-2_vs_col-0	4.31819	-	12.1379	6.22367	4.26185
1	11330242	11330552	hen2-2_vs_col-0	9.05555	+	7.34635	4.11521	2.2189
1	11330366	11330521	hen2-2_vs_col-0	1.24746	-	8.51282	2.20802	1.16767
1	11350456	11350590	hen2-2_vs_col-0	1.86609	-	5.82275	3.41953	2.00566
1	11350593	11350626	hen2-2_vs_col-0	3.53869	-	3.5	2.33622	1.25007
1	11350646	11351459	hen2-2_vs_col-0	2.4093	+	12.0837	4.08601	2.19752
1	11350920	11351002	hen2-2_vs_col-0	inf	-	2.88985	3.11409	1.7941
1	11351467	11351614	hen2-2_vs_col-0	1.91802	+	7.96429	2.23794	1.15998
1	11351827	11351949	hen2-2_vs_col-0	1.75599	+	6.87398	2.14918	1.10579
1	11353271	11353441	hen2-2_vs_col-0	4.52522	-	3.80368	3.69347	2.1991
1	11353549	11353656	hen2-2_vs_col-0	5.34756	-	4.19378	4.42433	2.75317
1	11353659	11353790	hen2-2_vs_col-0	inf	-	3.93452	4.18624	2.56647
1	11354377	11354462	hen2-2_vs_col-0	2.53858	+	7.33056	2.48492	1.30911
1	11373974	11374131	hen2-2_vs_col-0	3.6715	-	4.37975	4.82573	3.06734
1	11374133	11374243	hen2-2_vs_col-0	9.2024	-	3.41763	3.26225	1.89595
1	11374279	11374569	hen2-2_vs_col-0	1.58921	+	5.78105	2.8197	1.49265
1	11375040	11376384	hen2-2_vs_col-0	2.45274	+	8.33059	4.99982	2.67136
1	11376475	11376675	hen2-2_vs_col-0	1.58177	+	6	2.27114	1.18224
1	11376801	11376999	hen2-2_vs_col-0	1.48906	+	4.87976	2.2301	1.15611
1	11377159	11377388	hen2-2_vs_col-0	1.7876	+	6.29006	2.49785	1.31551
1	11412624	11412786	hen2-2_vs_col-0	4.60911	+	3.92989	3.00477	1.59254
1	11412791	11413221	hen2-2_vs_col-0	2.25049	+	6.04093	3.09565	1.63699
1	11413230	11413336	hen2-2_vs_col-0	2.22708	+	5.07877	2.28187	1.18802
1	11413372	11413628	hen2-2_vs_col-0	2.09429	+	5.59533	2.90477	1.5337
1	11413661	11413733	hen2-2_vs_col-0	4.1193	+	3.65068	2.18972	1.13435
1	11413756	11413798	hen2-2_vs_col-0	3.16092	+	4.12957	2.12891	1.09341
1	11422433	11423120	hen2-2_vs_col-0	1.78883	-	86.2753	6.22367	4.26185
1	11423236	11423336	hen2-2_vs_col-0	1.09196	-	109.514	3.05429	1.75439
1	11423474	11423672	hen2-2_vs_col-0	2.11037	-	119.2	6.22367	4.26185
1	11424042	11424279	hen2-2_vs_col-0	1.46788	+	6.89706	2.64919	1.39871
1	11430645	11430909	hen2-2_vs_col-0	1.18969	+	9.04097	2.43437	1.28009
1	11431009	11431135	hen2-2_vs_col-0	2.15279	+	15.1918	2.54457	1.34226
1	11435145	11435421	hen2-2_vs_col-0	1.56129	-	46.7772	5.74655	3.87113
1	11435673	11435791	hen2-2_vs_col-0	2.64127	-	66.8307	6.22367	4.26185
1	11435974	11436077	hen2-2_vs_col-0	1.11729	-	10.2287	2.33364	1.24985
1	11454035	11454409	hen2-2_vs_col-0	1.24834	+	17.4989	2.60712	1.37812
1	11454470	11454907	hen2-2_vs_col-0	1.10096	-	11.9044	4.30459	2.65459
1	11469875	11470091	hen2-2_vs_col-0	1.55427	+	12.4546	2.47271	1.30339
1	11502168	11502291	hen2-2_vs_col-0	2.47419	-	4.70968	3.21126	1.86028
1	11523699	11524269	hen2-2_vs_col-0	3.76788	+	5.59532	3.29682	1.7465
1	11531563	11531681	hen2-2_vs_col-0	4.82118	-	5.14766	3.50021	2.0629
1	11532125	11532292	hen2-2_vs_col-0	1.51442	+	15.0289	2.3624	1.23133
1	11552743	11553852	hen2-2_vs_col-0	1.40125	-	10.9766	6.22367	4.26185
1	11555671	11555835	hen2-2_vs_col-0	1.02102	-	5.67316	2.52288	1.37753
1	11561666	11561766	hen2-2_vs_col-0	1.07968	-	13.6301	2.42385	1.30575
1	11671500	11671638	hen2-2_vs_col-0	5.70026	-	560.436	6.22367	4.26185
1	11672190	11672348	hen2-2_vs_col-0	5.12138	-	980.449	6.22367	4.26185
1	11684697	11685271	hen2-2_vs_col-0	2.68728	+	71.5257	4.25683	2.32773
1	11685294	11686015	hen2-2_vs_col-0	2.5251	+	65.0374	4.81418	2.60348
1	11698557	11698778	hen2-2_vs_col-0	6.27382	-	5.09395	5.5247	3.67004
1	11717860	11718180	hen2-2_vs_col-0	2.34989	-	6.15754	3.62928	2.16022
1	11718233	11718957	hen2-2_vs_col-0	2.31686	-	14.039	6.22367	4.26185
1	11719152	11719397	hen2-2_vs_col-0	1.3669	-	10.5296	3.6759	2.18385
1	11719431	11719623	hen2-2_vs_col-0	1.3711	-	7.33531	2.88026	1.62873
1	11763911	11764027	hen2-2_vs_col-0	6.27153	+	3.39194	2.64482	1.39731
1	11764032	11764155	hen2-2_vs_col-0	inf	+	3.51728	2.7841	1.47474
1	11768223	11768326	hen2-2_vs_col-0	3.03967	-	3.57898	2.99195	1.70811
1	11768365	11768718	hen2-2_vs_col-0	1.62492	-	8.59705	4.17059	2.55943
1	11769695	11769784	hen2-2_vs_col-0	3.04317	-	3.68254	3.01982	1.727
1	11769794	11769939	hen2-2_vs_col-0	5.5449	-	4.15264	4.17835	2.56413
1	11770397	11770825	hen2-2_vs_col-0	4.27664	-	5.91841	6.22367	4.26185
1	11771200	11771526	hen2-2_vs_col-0	2.21841	-	14.2803	6.22367	4.26185
1	11771778	11772055	hen2-2_vs_col-0	3.62301	+	4.49383	3.23094	1.70485
1	11785812	11786059	hen2-2_vs_col-0	2.1925	+	43.0354	2.9737	1.57703
1	11786223	11787429	hen2-2_vs_col-0	1.69046	+	26.6492	4.68455	2.60014
1	11787526	11787648	hen2-2_vs_col-0	2.15566	+	15.3089	2.57987	1.36149
1	11787766	11788261	hen2-2_vs_col-0	2.18557	+	11.9883	3.56419	1.91578
1	11795493	11795680	hen2-2_vs_col-0	2.3116	-	4.63868	3.26415	1.89646
1	11929249	11929397	hen2-2_vs_col-0	4.54687	-	4.33509	3.88323	2.33648
1	11970980	11972651	hen2-2_vs_col-0	1.16623	-	216.676	6.22367	4.26185
1	11971307	11971462	hen2-2_vs_col-0	4.55037	+	3.42308	2.51953	1.32723
1	11971468	11971734	hen2-2_vs_col-0	4.74058	+	4.51097	3.30143	1.74758
1	11971870	11971948	hen2-2_vs_col-0	7.03106	+	3.33635	2.27233	1.18302
1	12002524	12002921	hen2-2_vs_col-0	1.95165	+	7.96626	3.09565	1.63699
1	12003513	12003598	hen2-2_vs_col-0	3.58669	-	3.01578	2.3974	1.28975
1	12005279	12005319	hen2-2_vs_col-0	4.16644	-	3.03833	2.16994	1.14217
1	12005357	12006283	hen2-2_vs_col-0	1.8835	+	32.8538	3.98558	2.16845
1	12005388	12005444	hen2-2_vs_col-0	5.14997	-	4.25439	4.09982	2.50126
1	12005448	12005619	hen2-2_vs_col-0	6.77506	-	4.49792	5.74655	3.87113
1	12051639	12053615	hen2-2_vs_col-0	2.37707	+	15.0763	5.47694	2.69636
1	12055375	12056855	hen2-2_vs_col-0	3.10864	-	14.7227	6.22367	4.26185
1	12055994	12056183	hen2-2_vs_col-0	3.06889	+	6.31617	2.8278	1.49713
1	12056404	12056614	hen2-2_vs_col-0	4.50312	+	4.36019	2.82315	1.49397
1	12057245	12057756	hen2-2_vs_col-0	3.40917	+	18.2183	3.89036	2.1029
1	12083901	12084051	hen2-2_vs_col-0	1.38963	+	36.7062	2.04478	1.04157
1	12086506	12086600	hen2-2_vs_col-0	1.84618	+	10.0617	2.23535	1.15908
1	12086836	12087015	hen2-2_vs_col-0	2.06334	+	12.5254	2.55297	1.34605
1	12087063	12087219	hen2-2_vs_col-0	1.7779	+	17.9368	2.36454	1.23133
1	12090464	12090758	hen2-2_vs_col-0	1.07727	-	7.89709	3.5085	2.06915
1	12090947	12091108	hen2-2_vs_col-0	1.30022	-	5.70547	2.4131	1.29838
1	12091243	12091444	hen2-2_vs_col-0	1.07063	-	7.51627	3.39824	1.99242
1	12097231	12097342	hen2-2_vs_col-0	1.67002	-	9.79401	2.89631	1.63996
1	12120951	12121759	hen2-2_vs_col-0	1.23655	+	27.6022	3.54144	1.9004
1	12121863	12123826	hen2-2_vs_col-0	1.39786	+	26.6444	4.99982	2.67136
1	12182263	12182617	hen2-2_vs_col-0	1.86835	+	30.2913	3.63061	1.96706
1	12182692	12182833	hen2-2_vs_col-0	1.41677	+	7.86217	2.1936	1.13556
1	12191378	12191555	hen2-2_vs_col-0	1.37649	-	5.2199	2.66725	1.47391
1	12192120	12192251	hen2-2_vs_col-0	1.58084	-	5.55736	2.2642	1.20461
1	12194173	12194261	hen2-2_vs_col-0	1.02321	-	20.935	2.47124	1.33906
1	12197218	12197311	hen2-2_vs_col-0	1.17792	-	24.791	2.59908	1.43086
1	12197484	12197856	hen2-2_vs_col-0	1.20684	-	29.2725	5.26943	3.43459
1	12197979	12198060	hen2-2_vs_col-0	1.73236	-	29.5209	4.08695	2.49427
1	12198188	12198322	hen2-2_vs_col-0	1.37618	-	35.3016	4.26463	2.61728
1	12198458	12198546	hen2-2_vs_col-0	1.51076	-	34.5538	3.48727	2.05685
1	12198648	12198740	hen2-2_vs_col-0	1.34827	-	36.8579	3.52383	2.07661
1	12198829	12198914	hen2-2_vs_col-0	1.12026	-	29.7035	2.88942	1.63495
1	12199105	12199751	hen2-2_vs_col-0	1.01974	-	24.8972	5.18228	3.36736
1	12199876	12199921	hen2-2_vs_col-0	1.03563	-	32.9581	2.26088	1.20273
1	12200015	12200067	hen2-2_vs_col-0	1.02518	-	53.558	2.41404	1.29887
1	12200475	12200530	hen2-2_vs_col-0	1.90195	-	4.82781	2.03253	1.05186
1	12200623	12200802	hen2-2_vs_col-0	1.19105	-	51.7063	3.98063	2.4118
1	12213539	12214108	hen2-2_vs_col-0	1.24661	-	18.2564	5.26943	3.43459
1	12256312	12256424	hen2-2_vs_col-0	3.18003	+	3.21871	2.26609	1.17861
1	12324501	12324719	hen2-2_vs_col-0	4.70019	+	3.98858	3.02762	1.60224
1	12350940	12351206	hen2-2_vs_col-0	1.17971	-	108.129	4.01148	2.43597
1	12359770	12360638	hen2-2_vs_col-0	3.67797	+	80.4716	5.22167	2.69636
1	12360803	12360951	hen2-2_vs_col-0	2.31562	+	4.59684	2.41301	1.26367
1	12374807	12374955	hen2-2_vs_col-0	1.40924	+	14.9727	2.28756	1.18997
1	12375913	12376066	hen2-2_vs_col-0	4.26105	-	4.04221	2.81628	1.58222
1	12380978	12381460	hen2-2_vs_col-0	1.45606	-	10.2536	4.21935	2.59332
1	12381679	12381994	hen2-2_vs_col-0	1.31279	-	39.2715	4.61089	2.88383
1	12382116	12382153	hen2-2_vs_col-0	1.22683	-	279.737	2.33052	1.2481
1	12382230	12382311	hen2-2_vs_col-0	1.2068	-	317.503	3.29991	1.91602
1	12382419	12382520	hen2-2_vs_col-0	1.1792	-	257.99	3.4448	2.02233
1	12382610	12382679	hen2-2_vs_col-0	1.25706	-	135.638	3.14196	1.81157
1	12382757	12383497	hen2-2_vs_col-0	2.3511	-	87.0961	6.22367	4.26185
1	12383623	12383683	hen2-2_vs_col-0	2.71254	-	268.486	5.74655	3.87113
1	12383785	12383939	hen2-2_vs_col-0	2.49313	-	144.542	5.74655	3.87113
1	12384030	12384155	hen2-2_vs_col-0	2.70261	-	296.802	6.22367	4.26185
1	12384285	12384365	hen2-2_vs_col-0	2.6462	-	175.307	4.90145	3.13005
1	12384445	12384888	hen2-2_vs_col-0	2.98196	-	40.7199	6.22367	4.26185
1	12385193	12385272	hen2-2_vs_col-0	3.08562	-	36.3723	5.74655	3.87113
1	12385685	12385791	hen2-2_vs_col-0	2.82499	-	26.8925	4.90145	3.13005
1	12398452	12398534	hen2-2_vs_col-0	2.46606	-	3.32444	1.99896	1.02682
1	12516293	12516748	hen2-2_vs_col-0	1.14515	-	15.6399	4.5902	2.86552
1	12584397	12585281	hen2-2_vs_col-0	2.17018	-	6.94326	6.22367	4.26185
1	12585302	12585628	hen2-2_vs_col-0	2.20828	-	5.55002	3.78434	2.26209
1	12585691	12586327	hen2-2_vs_col-0	1.76106	-	6.93564	5.74655	3.87113
1	12586427	12586583	hen2-2_vs_col-0	1.33962	-	6.58781	3.0537	1.7541
1	12586685	12586967	hen2-2_vs_col-0	1.3504	-	7.7582	3.66616	2.18055
1	12586981	12587081	hen2-2_vs_col-0	1.25975	-	5.89604	2.5215	1.37635
1	12596041	12596188	hen2-2_vs_col-0	2.12508	+	15.5304	2.84166	1.50481
1	12596307	12596443	hen2-2_vs_col-0	2.04287	+	5.20073	2.23316	1.15779
1	12596511	12596573	hen2-2_vs_col-0	2.24869	+	9.75057	2.24911	1.16833
1	12596928	12597694	hen2-2_vs_col-0	2.01211	+	26.2403	4.31259	2.35108
1	12597778	12597936	hen2-2_vs_col-0	1.73927	+	29.8814	2.66792	1.406
1	12598322	12598757	hen2-2_vs_col-0	1.7056	+	24.723	3.5141	1.88175
1	12598846	12598978	hen2-2_vs_col-0	1.90295	+	56.4216	2.51043	1.32246
1	12599070	12599249	hen2-2_vs_col-0	2.14478	+	92.0472	2.80577	1.48646
1	12599573	12599724	hen2-2_vs_col-0	2.08098	+	103.692	2.6523	1.40123
1	12599824	12599943	hen2-2_vs_col-0	2.15712	+	108.646	2.62167	1.38754
1	12600022	12600554	hen2-2_vs_col-0	1.69533	+	26.6636	3.3913	1.79205
1	12600975	12601382	hen2-2_vs_col-0	1.50186	+	10.2672	3.20603	1.69228
1	12601537	12601890	hen2-2_vs_col-0	1.7908	+	6.28874	3.06364	1.6173
1	12601977	12602072	hen2-2_vs_col-0	1.07603	+	6.94494	2.263	1.17686
1	12615955	12616056	hen2-2_vs_col-0	1.50451	-	5.44958	2.04587	1.06105
1	12687153	12687556	hen2-2_vs_col-0	1.16119	-	9.00371	4.22804	2.59884
1	12710333	12710548	hen2-2_vs_col-0	1.43213	+	6.00265	2.05761	1.04967
1	12924483	12924600	hen2-2_vs_col-0	2.45385	-	3.97276	2.73357	1.52144
1	12924737	12924991	hen2-2_vs_col-0	3.16676	-	4.95658	4.09982	2.50126
1	12932530	12932656	hen2-2_vs_col-0	1.61357	-	7.29809	3.0054	1.71753
1	12932853	12933377	hen2-2_vs_col-0	1.21592	-	23.5184	4.63261	2.90155
1	12933444	12933554	hen2-2_vs_col-0	1.03122	-	43.7368	2.6985	1.49906
1	12933695	12933797	hen2-2_vs_col-0	1.09929	-	35.2691	2.51738	1.37373
1	12933986	12934594	hen2-2_vs_col-0	1.23428	-	17.0958	5.10973	3.31757
1	12935883	12936312	hen2-2_vs_col-0	2.50168	+	6.60365	3.28215	1.74039
1	12935960	12936426	hen2-2_vs_col-0	1.85486	-	12.4073	6.22367	4.26185
1	12936971	12938007	hen2-2_vs_col-0	4.25349	+	44.8784	5.22167	2.69636
1	12938094	12938555	hen2-2_vs_col-0	6.71763	+	14.6031	3.75927	2.03464
1	12938729	12939449	hen2-2_vs_col-0	6.16316	+	9.67496	5.06197	2.69636
1	12942641	12942740	hen2-2_vs_col-0	3.56797	+	3.92214	2.61231	1.38218
1	12961600	12961696	hen2-2_vs_col-0	3.01314	-	3.01325	2.024	1.04518
1	12965984	12966223	hen2-2_vs_col-0	1.31855	+	7.83274	2.28254	1.18802
1	12967687	12968100	hen2-2_vs_col-0	5.65442	+	7.86111	3.65347	1.98372
1	13046666	13046731	hen2-2_vs_col-0	inf	+	3.6039	2.28454	1.18892
1	13076689	13077617	hen2-2_vs_col-0	2.73716	+	21.9622	4.89716	2.64669
1	13077680	13077915	hen2-2_vs_col-0	1.99035	+	10.9552	3.10661	1.64239
1	13078268	13078508	hen2-2_vs_col-0	1.25334	+	10.2952	2.35029	1.22639
1	13079019	13079459	hen2-2_vs_col-0	4.41345	-	6.04179	6.22367	4.26185
1	13116110	13116584	hen2-2_vs_col-0	1.30515	+	31.1406	2.87641	1.52604
1	13116974	13117131	hen2-2_vs_col-0	1.2291	+	18.8255	2.06556	1.05454
1	13117185	13117796	hen2-2_vs_col-0	2.04343	+	12.8283	3.87706	2.0957
1	13117914	13118147	hen2-2_vs_col-0	4.87706	+	4.27595	2.90245	1.53295
1	13145600	13146755	hen2-2_vs_col-0	4.24266	-	38.39	6.22367	4.26185
1	13220609	13221549	hen2-2_vs_col-0	1.28224	-	14.0608	5.74655	3.87113
1	13221481	13221585	hen2-2_vs_col-0	1.60435	+	5.6898	2.19459	1.13617
1	13221552	13222073	hen2-2_vs_col-0	1.08783	-	14.2989	4.55157	2.8324
1	13222211	13222355	hen2-2_vs_col-0	2.09954	+	4.41084	2.04638	1.04265
1	13222268	13222920	hen2-2_vs_col-0	1.16855	-	14.6178	5.10973	3.31757
1	13222361	13222476	hen2-2_vs_col-0	1.78199	+	5.98337	2.14004	1.09997
1	13223287	13223478	hen2-2_vs_col-0	1.55463	+	4.92783	2.05821	1.04992
1	13281714	13281913	hen2-2_vs_col-0	1.23873	-	6.865	3.44624	2.02233
1	13451967	13452049	hen2-2_vs_col-0	2.83894	-	3.39673	2.40235	1.29277
1	13452294	13453082	hen2-2_vs_col-0	2.7554	-	6.82528	5.74655	3.87113
1	13455197	13455673	hen2-2_vs_col-0	1.12693	-	19.9441	4.82573	3.06734
1	13456043	13456318	hen2-2_vs_col-0	1.10616	-	19.7893	3.59324	2.13029
1	13533560	13533898	hen2-2_vs_col-0	1.63714	+	18.6574	2.82702	1.49713
1	13549896	13550068	hen2-2_vs_col-0	1.39519	+	15.699	2.34079	1.22175
1	13550170	13550287	hen2-2_vs_col-0	1.49199	+	6.28692	2.00299	1.0163
1	13603107	13603207	hen2-2_vs_col-0	2.49468	-	3.82956	2.35286	1.26029
1	13603538	13603586	hen2-2_vs_col-0	2.8721	-	3.36006	2.17233	1.1436
1	13701025	13701336	hen2-2_vs_col-0	1.60488	-	6.0783	4.4678	2.77292
1	14148260	14148424	hen2-2_vs_col-0	inf	-	2.79697	2.62674	1.44917
1	14148540	14148651	hen2-2_vs_col-0	inf	-	4.36416	3.04383	1.74601
1	14148915	14150168	hen2-2_vs_col-0	7.08918	-	10.6801	6.22367	4.26185
1	14149763	14149869	hen2-2_vs_col-0	5.16297	+	3.83511	2.38654	1.24309
1	14150386	14150999	hen2-2_vs_col-0	6.42769	+	79.1219	5.33081	2.69636
1	14151039	14151766	hen2-2_vs_col-0	8.67702	+	24.3557	5.06197	2.69636
1	14152435	14152726	hen2-2_vs_col-0	inf	+	3.75978	2.9204	1.54394
1	14285693	14285725	hen2-2_vs_col-0	2.48661	-	4.37446	2.71246	1.50732
1	14285875	14285925	hen2-2_vs_col-0	2.86498	-	3.78291	2.45172	1.32612
1	14285948	14285985	hen2-2_vs_col-0	2.63917	-	4.02256	2.27924	1.21508
1	15606662	15607044	hen2-2_vs_col-0	1.21361	-	6.87915	3.50683	2.06871
1	15650255	15650868	hen2-2_vs_col-0	4.02391	+	8.21987	4.42004	2.40315
1	15650477	15650643	hen2-2_vs_col-0	1.09096	-	6.38751	2.12756	1.11525
1	15650917	15651060	hen2-2_vs_col-0	4.74396	+	4.53621	2.70653	1.4294
1	15973301	15973486	hen2-2_vs_col-0	1.83576	+	46.0611	2.56472	1.35238
1	15973569	15973759	hen2-2_vs_col-0	4.39983	-	3.8448	3.74223	2.23366
1	15973806	15973889	hen2-2_vs_col-0	5.64829	-	2.82738	2.02312	1.04473
1	15974175	15974353	hen2-2_vs_col-0	4.53227	-	3.73743	3.53972	2.08789
1	15974455	15974753	hen2-2_vs_col-0	2.69012	-	5.03559	4.32604	2.67
1	15974834	15975056	hen2-2_vs_col-0	2.8891	-	3.73543	3.21126	1.86028
1	15975070	15975098	hen2-2_vs_col-0	2.6502	-	4.39163	2.64081	1.45737
1	15975103	15975249	hen2-2_vs_col-0	2.17879	-	4.98785	3.32004	1.9317
1	15975286	15976690	hen2-2_vs_col-0	2.18795	-	7.86228	6.22367	4.26185
1	15980128	15980304	hen2-2_vs_col-0	-2.16688	-	7.34504	2.94469	1.67495
1	15980967	15981140	hen2-2_vs_col-0	-2.55813	-	9.59319	3.69604	2.19934
1	15981491	15981579	hen2-2_vs_col-0	-1.9719	-	7.73194	1.97406	1.01059
1	15981811	15981899	hen2-2_vs_col-0	-2.12857	-	7.9687	2.48307	1.34801
1	15982138	15982254	hen2-2_vs_col-0	-1.69774	-	8.42308	2.17279	1.1439
1	15982328	15982553	hen2-2_vs_col-0	-2.24843	-	8.28571	3.51018	2.06918
1	15983188	15983282	hen2-2_vs_col-0	-2.19307	-	6.59098	2.24108	1.18937
1	16126360	16127283	hen2-2_vs_col-0	4.09795	-	10.2655	6.22367	4.26185
1	16264396	16264638	hen2-2_vs_col-0	1.96162	+	5.44033	2.90384	1.53355
1	16638820	16640239	hen2-2_vs_col-0	1.24513	-	18.9619	6.22367	4.26185
1	16641338	16643465	hen2-2_vs_col-0	1.39865	-	42.8724	6.22367	4.26185
1	16689051	16689227	hen2-2_vs_col-0	1.50053	-	6.37934	3.10145	1.78734
1	16704314	16704414	hen2-2_vs_col-0	4.76663	-	2.71429	2.25309	1.19749
1	16704461	16704474	hen2-2_vs_col-0	3.93931	-	3.66837	2.13465	1.12018
1	16704516	16704582	hen2-2_vs_col-0	2.53571	-	5.2548	2.00611	1.03252
1	16704661	16704818	hen2-2_vs_col-0	4.57229	-	5.44665	4.57046	2.84893
1	16704893	16705035	hen2-2_vs_col-0	4.68731	-	5.33417	4.99322	3.2165
1	16705045	16705888	hen2-2_vs_col-0	4.60773	-	14.2912	6.22367	4.26185
1	16780294	16786776	hen2-2_vs_col-0	1.90479	-	42.8544	6.22367	4.26185
1	16799294	16799410	hen2-2_vs_col-0	1.332	-	5.14957	2.18517	1.15277
1	16837698	16838189	hen2-2_vs_col-0	1.99901	+	6.8509	3.1703	1.67474
1	16888467	16888694	hen2-2_vs_col-0	1.44456	+	10.4402	2.74535	1.45699
1	16895670	16895865	hen2-2_vs_col-0	inf	-	4.75474	5.74655	3.87113
1	16897410	16897799	hen2-2_vs_col-0	5.9216	+	4.51392	3.66403	1.98957
1	16911633	16911755	hen2-2_vs_col-0	2.22431	-	3.36353	2.38526	1.28186
1	16916162	16916515	hen2-2_vs_col-0	1.24215	-	6.43019	3.65196	2.17582
1	16964506	16964648	hen2-2_vs_col-0	2.62307	-	3.83067	3.16335	1.82523
1	16964670	16964798	hen2-2_vs_col-0	2.14577	-	4.42193	3.22498	1.86929
1	17014626	17014697	hen2-2_vs_col-0	inf	+	3.10615	2.36494	1.23133
1	17014788	17014856	hen2-2_vs_col-0	5.02074	+	2.84058	2.11684	1.08726
1	17057761	17057986	hen2-2_vs_col-0	1.05527	+	11.2228	2.38345	1.24125
1	17065275	17065453	hen2-2_vs_col-0	2.80168	-	3.24182	2.52845	1.38164
1	17065653	17065843	hen2-2_vs_col-0	3.33453	-	4.06358	3.5525	2.09685
1	17091000	17091402	hen2-2_vs_col-0	2.34877	+	7.09624	3.33144	1.76047
1	17098693	17098896	hen2-2_vs_col-0	1.38753	+	11.3225	2.53079	1.33397
1	17124208	17124710	hen2-2_vs_col-0	2.23543	+	46.5186	3.65347	1.98372
1	17125051	17125635	hen2-2_vs_col-0	2.104	+	71.5908	3.91823	2.1225
1	17125852	17126201	hen2-2_vs_col-0	1.3948	+	24.1504	2.84247	1.50481
1	17126203	17126433	hen2-2_vs_col-0	1.10037	+	29.6512	2.35381	1.22768
1	17126772	17127473	hen2-2_vs_col-0	3.72119	-	8.14662	6.22367	4.26185
1	17154840	17155084	hen2-2_vs_col-0	1.04294	-	22.714	3.5525	2.09685
1	17155419	17155524	hen2-2_vs_col-0	1.02048	-	25.6961	2.6985	1.49906
1	17155532	17157247	hen2-2_vs_col-0	1.41566	-	37.2412	6.22367	4.26185
1	17157635	17158067	hen2-2_vs_col-0	1.30587	-	31.9142	5.18228	3.36736
1	17158774	17158884	hen2-2_vs_col-0	1.14686	-	49.1725	3.34001	1.94874
1	17159333	17159520	hen2-2_vs_col-0	1.12819	-	60.4077	3.66376	2.17952
1	17160770	17160882	hen2-2_vs_col-0	1.21342	-	78.9456	3.50683	2.06871
1	17162254	17162372	hen2-2_vs_col-0	1.11961	-	60.9838	3.09237	1.78406
1	17164539	17164757	hen2-2_vs_col-0	1.14095	-	33.1314	3.44048	2.0192
1	17167690	17167772	hen2-2_vs_col-0	1.45542	-	7.06282	2.11582	1.10808
1	17180810	17181093	hen2-2_vs_col-0	1.74251	+	17.0895	2.9488	1.5601
1	17181132	17182990	hen2-2_vs_col-0	2.68084	+	13.0556	6.17591	3.10351
1	17183632	17183956	hen2-2_vs_col-0	1.71886	-	6.16505	3.748	2.23702
1	17183963	17184265	hen2-2_vs_col-0	1.28426	-	8.23338	2.88541	1.63228
1	17184648	17184977	hen2-2_vs_col-0	1.05834	-	7.45411	3.18346	1.83985
1	17185105	17185589	hen2-2_vs_col-0	1.06108	-	7.34669	3.71447	2.21259
1	17185747	17185894	hen2-2_vs_col-0	1.33959	-	8.43678	2.35544	1.26096
1	17185904	17186169	hen2-2_vs_col-0	1.54416	-	8.37218	3.53259	2.08286
1	17186229	17186402	hen2-2_vs_col-0	1.444	-	8.40681	2.6372	1.45579
1	17191890	17192642	hen2-2_vs_col-0	4.09425	-	6.97856	6.22367	4.26185
1	17192733	17192830	hen2-2_vs_col-0	4.1972	-	4.14504	3.12364	1.80021
1	17226280	17226377	hen2-2_vs_col-0	inf	-	2.92055	2.59949	1.43086
1	17253126	17253729	hen2-2_vs_col-0	2.3881	-	8.31315	6.22367	4.26185
1	17265640	17265744	hen2-2_vs_col-0	4.08722	+	4.23605	2.79842	1.4819
1	17265748	17265903	hen2-2_vs_col-0	3.46987	+	4.64057	2.90106	1.53234
1	17266006	17266192	hen2-2_vs_col-0	3.5101	+	4.16578	2.71909	1.43717
1	17295963	17296409	hen2-2_vs_col-0	3.343	-	6.28428	5.5247	3.67004
1	17296285	17296471	hen2-2_vs_col-0	1.70905	+	9.90718	2.75711	1.46154
1	17355993	17356213	hen2-2_vs_col-0	2.80858	-	5.65643	4.11987	2.51475
1	17385717	17386188	hen2-2_vs_col-0	2.16162	+	85.1023	2.89511	1.53182
1	17386191	17386871	hen2-2_vs_col-0	3.81462	+	9.46381	3.48307	1.85887
1	17389116	17389473	hen2-2_vs_col-0	3.28434	+	7.74202	3.1878	1.68022
1	17391742	17391893	hen2-2_vs_col-0	2.10994	-	5.16682	2.91383	1.65234
1	17401714	17402059	hen2-2_vs_col-0	1.26669	-	11.0782	3.54698	2.09302
1	17455630	17455814	hen2-2_vs_col-0	-1.20629	-	29.712	2.20995	1.16919
1	17464885	17465099	hen2-2_vs_col-0	1.38497	-	5.06113	2.58688	1.42237
1	17473668	17473855	hen2-2_vs_col-0	1.23904	+	22.7033	2.36481	1.23133
1	17474380	17474535	hen2-2_vs_col-0	1.20007	+	20.7363	2.12635	1.09251
1	17483245	17484147	hen2-2_vs_col-0	3.35107	-	94.5183	6.22367	4.26185
1	17484915	17485595	hen2-2_vs_col-0	3.88573	-	9.61066	6.22367	4.26185
1	17485830	17485863	hen2-2_vs_col-0	5.16323	-	2.78571	1.97976	1.01424
1	17486029	17486130	hen2-2_vs_col-0	2.30309	-	5.57353	3.40216	1.99405
1	17560521	17560668	hen2-2_vs_col-0	1.02684	-	72.8499	3.26415	1.89646
1	17572919	17573012	hen2-2_vs_col-0	4.15113	-	3.55091	3.30198	1.91691
1	17617578	17617713	hen2-2_vs_col-0	-1.78361	-	4.90021	2.31923	1.24129
1	17660628	17661763	hen2-2_vs_col-0	5.79281	+	6.84897	5.33081	2.69636
1	17661852	17661992	hen2-2_vs_col-0	4.77759	+	5.41489	2.97098	1.57651
1	17662064	17662409	hen2-2_vs_col-0	7.99652	+	6.61602	3.69447	1.99061
1	17663553	17663646	hen2-2_vs_col-0	3.80308	+	3.29635	2.10348	1.07823
1	17663773	17663930	hen2-2_vs_col-0	3.01031	+	3.49684	2.46335	1.29551
1	17687712	17688201	hen2-2_vs_col-0	3.92032	-	6.69373	5.74655	3.87113
1	17688210	17688258	hen2-2_vs_col-0	2.60703	-	4.80758	3.11073	1.79199
1	17688273	17688314	hen2-2_vs_col-0	3.34353	-	4.39966	2.88541	1.63228
1	17688319	17688412	hen2-2_vs_col-0	3.07838	-	4.64438	2.51943	1.37533
1	17695650	17695924	hen2-2_vs_col-0	1.89237	+	18.0652	2.80098	1.48376
1	17699988	17700266	hen2-2_vs_col-0	1.08908	+	11.4959	2.43944	1.28325
1	17700583	17700758	hen2-2_vs_col-0	1.17066	+	13.25	2.13733	1.09835
1	17705960	17706084	hen2-2_vs_col-0	inf	+	4.23314	2.52668	1.33143
1	17706090	17706172	hen2-2_vs_col-0	6.26896	+	2.89071	2.22961	1.15602
1	17746590	17746693	hen2-2_vs_col-0	-1.30949	-	6.90453	2.30622	1.23184
1	17768489	17768669	hen2-2_vs_col-0	1.61659	+	7.21665	2.43991	1.28325
1	17769398	17769579	hen2-2_vs_col-0	1.62325	-	7.36381	2.89063	1.63562
1	17798641	17798895	hen2-2_vs_col-0	1.28851	+	10.0583	2.66336	1.40508
1	17825617	17826158	hen2-2_vs_col-0	1.67223	+	20.4089	3.54346	1.9004
1	17825851	17826061	hen2-2_vs_col-0	4.20307	-	4.66723	4.82573	3.06734
1	17826274	17826435	hen2-2_vs_col-0	1.45517	+	10.7703	2.30416	1.19939
1	17826460	17826624	hen2-2_vs_col-0	1.64625	+	6.33117	2.13797	1.09862
1	17835784	17835904	hen2-2_vs_col-0	1.7848	-	4.88135	2.77822	1.55252
1	17836170	17836398	hen2-2_vs_col-0	4.02004	-	6.55427	4.21935	2.59332
1	17836761	17836850	hen2-2_vs_col-0	2.48709	-	3.57063	2.29451	1.22488
1	17837027	17837269	hen2-2_vs_col-0	3.15766	-	3.86802	3.81374	2.28247
1	17837407	17837544	hen2-2_vs_col-0	3.3809	-	5.28313	4.01148	2.43597
1	17837860	17838003	hen2-2_vs_col-0	1.30769	-	7.83185	2.59805	1.43046
1	17838006	17838173	hen2-2_vs_col-0	1.00235	-	9.78486	2.44704	1.32383
1	17864273	17864515	hen2-2_vs_col-0	7.82959	-	6.58172	5.74655	3.87113
1	17874457	17875071	hen2-2_vs_col-0	1.44924	+	39.9387	3.44432	1.83703
1	17876126	17877143	hen2-2_vs_col-0	1.13444	+	27.0238	3.5882	1.9353
1	17877297	17877452	hen2-2_vs_col-0	1.2302	+	19.3988	2.2255	1.1531
1	17883763	17883870	hen2-2_vs_col-0	1.35469	-	4.63029	1.96626	1.00529
1	17895912	17896180	hen2-2_vs_col-0	1.2597	-	8.92061	4.02777	2.44433
1	17910678	17911398	hen2-2_vs_col-0	2.12064	+	13.696	3.8123	2.07508
1	17950554	17951413	hen2-2_vs_col-0	1.46633	+	18.8812	3.87706	2.0957
1	17951430	17951687	hen2-2_vs_col-0	1.8791	+	5.0191	2.63948	1.39609
1	17965727	17965895	hen2-2_vs_col-0	1.36349	-	7.07819	2.6112	1.43922
1	17972928	17973021	hen2-2_vs_col-0	3.41827	+	3.21581	2.02895	1.03209
1	18011205	18011283	hen2-2_vs_col-0	3.33212	-	3.81374	3.26702	1.89794
1	18011288	18011568	hen2-2_vs_col-0	2.83471	+	4.05872	2.79013	1.47875
1	18011417	18011528	hen2-2_vs_col-0	2.67672	-	5.49362	3.29784	1.91602
1	18011605	18011723	hen2-2_vs_col-0	2.38706	-	4.69748	2.28912	1.22089
1	18011833	18011957	hen2-2_vs_col-0	2.37245	-	5.052	3.43198	2.01344
1	18031126	18031450	hen2-2_vs_col-0	3.21674	-	5.22989	3.86384	2.31866
1	18038584	18038680	hen2-2_vs_col-0	2.8593	+	3.67231	2.32264	1.21187
1	18061682	18061914	hen2-2_vs_col-0	1.63413	+	28.611	2.78024	1.47295
1	18074739	18075096	hen2-2_vs_col-0	1.6633	-	15.9745	4.82573	3.06734
1	18102334	18102542	hen2-2_vs_col-0	1.07483	-	8.51572	2.80454	1.57252
1	18138366	18138843	hen2-2_vs_col-0	3.81044	-	10.5538	6.22367	4.26185
1	18138976	18139144	hen2-2_vs_col-0	1.67384	+	53.1179	2.67746	1.41124
1	18177058	18177176	hen2-2_vs_col-0	4.6343	+	3.10144	2.52843	1.33267
1	18177385	18178264	hen2-2_vs_col-0	4.06277	+	18.2262	5.06197	2.69636
1	18198139	18198362	hen2-2_vs_col-0	5.03887	-	5.228	5.5247	3.67004
1	18198364	18198402	hen2-2_vs_col-0	4.26392	-	3.14652	2.75933	1.53911
1	18198434	18198591	hen2-2_vs_col-0	2.55115	-	6.67179	3.93364	2.37247
1	18198666	18198897	hen2-2_vs_col-0	2.76207	-	7.13424	4.76127	3.01635
1	18198971	18199612	hen2-2_vs_col-0	4.32572	-	6.01035	6.22367	4.26185
1	18199686	18199880	hen2-2_vs_col-0	3.34971	+	5.44139	3.10587	1.64239
1	18199783	18200089	hen2-2_vs_col-0	5.124	-	4.04793	5.74655	3.87113
1	18201162	18201201	hen2-2_vs_col-0	4.50863	-	4.8375	3.55622	2.09886
1	18201342	18201461	hen2-2_vs_col-0	5.38457	-	4.07381	3.78434	2.26209
1	18201511	18201551	hen2-2_vs_col-0	5.40732	-	3.10279	2.25692	1.2004
1	18209298	18209692	hen2-2_vs_col-0	1.29542	+	24.0146	2.85019	1.50945
1	18209748	18210160	hen2-2_vs_col-0	1.08562	+	20.9083	2.9156	1.54217
1	18218312	18218549	hen2-2_vs_col-0	2.06875	-	25.1185	5.74655	3.87113
1	18218738	18218981	hen2-2_vs_col-0	1.50166	+	80.5919	2.61949	1.38594
1	18315623	18316308	hen2-2_vs_col-0	1.36704	-	36.4169	6.22367	4.26185
1	18319727	18320005	hen2-2_vs_col-0	1.13934	-	8.71301	3.21126	1.86028
1	18321400	18322055	hen2-2_vs_col-0	2.48055	+	18.5072	4.42004	2.40315
1	18322136	18322468	hen2-2_vs_col-0	1.7725	+	9.47426	2.95138	1.56186
1	18322273	18322534	hen2-2_vs_col-0	1.63359	-	34.0341	6.22367	4.26185
1	18322529	18323180	hen2-2_vs_col-0	4.13578	+	9.54798	4.68455	2.60014
1	18322655	18322680	hen2-2_vs_col-0	3.78501	-	3.20879	2.11332	1.10621
1	18323186	18323293	hen2-2_vs_col-0	4.53287	+	4.18452	2.85556	1.51261
1	18323381	18323453	hen2-2_vs_col-0	4.68948	+	3.19961	2.25983	1.17531
1	18323653	18323963	hen2-2_vs_col-0	3.3707	+	6.35714	3.09637	1.63699
1	18357365	18357670	hen2-2_vs_col-0	1.04699	-	34.1235	3.72813	2.22292
1	18357980	18358689	hen2-2_vs_col-0	2.36096	+	5.82716	3.66941	1.98957
1	18362677	18362879	hen2-2_vs_col-0	1.64531	-	4.7266	2.79311	1.56363
1	18362897	18363172	hen2-2_vs_col-0	2.45775	-	6.54736	4.82573	3.06734
1	18365710	18366280	hen2-2_vs_col-0	4.90347	+	8.21391	4.74455	2.60014
1	18388764	18389065	hen2-2_vs_col-0	2.39914	-	9275.43	6.22367	4.26185
1	18388896	18389032	hen2-2_vs_col-0	2.98151	+	5.96611	2.77125	1.46701
1	18400424	18400603	hen2-2_vs_col-0	1.27096	+	31.4476	2.19486	1.13617
1	18402591	18402709	hen2-2_vs_col-0	1.21166	+	9.78691	2.01595	1.02255
1	18405103	18405469	hen2-2_vs_col-0	1.00159	-	59.3499	4.18624	2.56647
1	18411863	18412006	hen2-2_vs_col-0	2.65704	+	4.70486	2.62679	1.39151
1	18428010	18428160	hen2-2_vs_col-0	1.38751	-	37.0899	3.66616	2.18055
1	18428794	18428896	hen2-2_vs_col-0	4.79941	+	3.90083	2.9233	1.54431
1	18444082	18444232	hen2-2_vs_col-0	1.34523	-	5.41154	2.20071	1.16279
1	18444374	18444511	hen2-2_vs_col-0	1.35635	-	6.54762	2.61826	1.44337
1	18476554	18476705	hen2-2_vs_col-0	1.44822	-	5.96805	2.93654	1.66929
1	18477117	18477284	hen2-2_vs_col-0	1.16933	-	5.59609	2.35286	1.26029
1	18477358	18477586	hen2-2_vs_col-0	1.16897	-	8.35028	3.15216	1.81824
1	18487721	18487823	hen2-2_vs_col-0	2.2637	-	4.69972	3.19551	1.84853
1	18489499	18489571	hen2-2_vs_col-0	1.16835	-	8.74168	2.28751	1.22033
1	18489681	18489772	hen2-2_vs_col-0	1.38262	-	8.08307	2.285	1.21891
1	18489864	18489990	hen2-2_vs_col-0	1.59809	-	5.78065	2.19898	1.16238
1	18490717	18490866	hen2-2_vs_col-0	1.28055	-	7.2881	3.04787	1.74916
1	18490965	18491021	hen2-2_vs_col-0	1.70796	-	5.58772	2.14612	1.12716
1	18491126	18491189	hen2-2_vs_col-0	1.70302	-	5.71875	2.20986	1.16919
1	18491286	18491380	hen2-2_vs_col-0	1.81446	-	4.71429	2.45069	1.32589
1	18492730	18492851	hen2-2_vs_col-0	2.4152	-	6.12998	3.21126	1.86028
1	18498693	18498790	hen2-2_vs_col-0	2.51795	+	5.33017	2.21293	1.14602
1	18499310	18499475	hen2-2_vs_col-0	1.45307	+	6.81153	2.13964	1.09993
1	18501481	18501644	hen2-2_vs_col-0	1.93974	+	5.65157	2.07468	1.05953
1	18510895	18510976	hen2-2_vs_col-0	2.33382	-	3.68902	2.21579	1.17282
1	18511178	18511230	hen2-2_vs_col-0	3.18982	-	3.49326	2.41742	1.30148
1	18511406	18512457	hen2-2_vs_col-0	2.13634	-	6.28646	6.22367	4.26185
1	18543194	18543373	hen2-2_vs_col-0	1.44677	-	8.93492	2.37814	1.27693
1	18548890	18549358	hen2-2_vs_col-0	1.47762	-	20.4843	6.22367	4.26185
1	18571168	18571337	hen2-2_vs_col-0	1.1383	-	5.52143	2.13204	1.11804
1	18625245	18625512	hen2-2_vs_col-0	1.52004	+	8.9968	2.6972	1.42351
1	18627619	18628795	hen2-2_vs_col-0	3.96927	+	39.7145	5.69879	2.69894
1	18650165	18650411	hen2-2_vs_col-0	1.43885	+	6.65905	2.5201	1.32723
1	18670405	18670504	hen2-2_vs_col-0	2.57954	+	3.98714	2.07668	1.06049
1	18672305	18672780	hen2-2_vs_col-0	1.55507	+	11.1252	3.09782	1.63699
1	18692188	18692998	hen2-2_vs_col-0	3.20981	-	20.4829	6.22367	4.26185
1	18716225	18716447	hen2-2_vs_col-0	1.53994	+	9.73575	2.50855	1.32213
1	18719488	18719883	hen2-2_vs_col-0	1.21002	+	13.8543	2.75185	1.45891
1	18719889	18720307	hen2-2_vs_col-0	1.1481	+	14.2893	2.88566	1.52926
1	18720396	18720675	hen2-2_vs_col-0	1.31842	+	13.6566	2.66497	1.40508
1	18720776	18721135	hen2-2_vs_col-0	1.16451	+	10.3409	2.74471	1.45699
1	18756774	18757081	hen2-2_vs_col-0	5.70387	+	5.58094	3.96909	2.15414
1	18776570	18776974	hen2-2_vs_col-0	1.01001	-	92.3286	6.22367	4.26185
1	18802230	18803407	hen2-2_vs_col-0	4.35907	-	9.96738	6.22367	4.26185
1	18803346	18803776	hen2-2_vs_col-0	1.81662	+	35.2547	3.41474	1.81149
1	18880181	18880354	hen2-2_vs_col-0	1.37079	+	13.2566	2.55442	1.34696
1	18926080	18926211	hen2-2_vs_col-0	1.28278	-	5.7868	2.54071	1.38885
1	18927488	18927542	hen2-2_vs_col-0	3.06056	-	3.78571	2.12652	1.11451
1	18933326	18933788	hen2-2_vs_col-0	1.11587	+	10.3534	3.15846	1.66811
1	18934279	18934611	hen2-2_vs_col-0	1.91407	-	4.60811	3.34343	1.95032
1	18934613	18935214	hen2-2_vs_col-0	2.93885	-	8.0108	4.5161	2.8062
1	19042069	19042369	hen2-2_vs_col-0	4.13587	-	4.21073	5.74655	3.87113
1	19048795	19048916	hen2-2_vs_col-0	1.14797	+	8.0363	2.44023	1.28325
1	19052732	19052892	hen2-2_vs_col-0	1.67506	+	6.90949	2.44392	1.28405
1	19052904	19053725	hen2-2_vs_col-0	1.16809	-	46.2569	6.22367	4.26185
1	19053131	19053396	hen2-2_vs_col-0	3.88805	+	7.26182	3.71501	2.00008
1	19053418	19053568	hen2-2_vs_col-0	2.9114	+	3.68921	2.19532	1.13617
1	19109833	19110006	hen2-2_vs_col-0	2.84701	+	5.48358	2.47495	1.30445
1	19121950	19122083	hen2-2_vs_col-0	1.21731	-	5.03731	2.15028	1.12929
1	19131830	19131973	hen2-2_vs_col-0	1.30485	-	11.9405	2.9456	1.67559
1	19149986	19150717	hen2-2_vs_col-0	1.60458	-	6.43111	4.63261	2.90155
1	19151037	19151290	hen2-2_vs_col-0	1.3658	-	7.19966	3.37302	1.9736
1	19151323	19151722	hen2-2_vs_col-0	1.43043	-	5.73625	3.45062	2.02578
1	19174648	19174767	hen2-2_vs_col-0	1.68358	-	5.24524	2.09061	1.09159
1	19179821	19179884	hen2-2_vs_col-0	1.27757	-	14.3393	2.43557	1.31473
1	19249544	19249913	hen2-2_vs_col-0	4.4035	+	5.00174	3.63061	1.96706
1	19305226	19305906	hen2-2_vs_col-0	2.90834	-	15.5052	6.22367	4.26185
1	19365041	19365154	hen2-2_vs_col-0	1.5178	-	5.30388	2.21223	1.1704
1	19365641	19365815	hen2-2_vs_col-0	1.46073	-	6.50327	2.66388	1.47217
1	19365926	19366072	hen2-2_vs_col-0	1.80176	-	4.66521	2.41974	1.30262
1	19366315	19366438	hen2-2_vs_col-0	1.5721	-	4.81336	2.14889	1.12821
1	19383130	19383599	hen2-2_vs_col-0	1.02104	-	262.799	4.09334	2.49596
1	19384296	19384861	hen2-2_vs_col-0	1.02014	-	321.178	4.4678	2.77292
1	19384869	19385525	hen2-2_vs_col-0	1.04314	-	200.942	6.22367	4.26185
1	19430361	19431389	hen2-2_vs_col-0	5.83983	-	29.0564	6.22367	4.26185
1	19430730	19431167	hen2-2_vs_col-0	4.16768	+	10.7422	3.66403	1.98957
1	19431183	19431400	hen2-2_vs_col-0	4.3521	+	4.6327	2.93362	1.55061
1	19442476	19442846	hen2-2_vs_col-0	6.17827	+	6.53042	3.90407	2.11249
1	19442850	19442889	hen2-2_vs_col-0	4.59096	+	3.58571	1.98865	1.00807
1	19470070	19470293	hen2-2_vs_col-0	-1.16796	-	32.3989	2.44487	1.32225
1	19470284	19470960	hen2-2_vs_col-0	2.4867	+	9.26841	3.92794	2.13011
1	19471696	19471934	hen2-2_vs_col-0	-1.03353	-	38.7672	2.72302	1.51477
1	19491048	19491468	hen2-2_vs_col-0	7.00107	+	21.8371	4.21687	2.2962
1	19491639	19491769	hen2-2_vs_col-0	1.56859	-	8.6892	2.84874	1.60355
1	19491811	19492418	hen2-2_vs_col-0	1.23413	-	53.2753	5.10973	3.31757
1	19491984	19492224	hen2-2_vs_col-0	7.05137	+	5.38678	3.46075	1.84664
1	19492244	19492681	hen2-2_vs_col-0	3.43506	+	7.51875	4.05864	2.18474
1	19506523	19507016	hen2-2_vs_col-0	1.13923	+	23.4427	3.00243	1.59107
1	19509365	19509510	hen2-2_vs_col-0	1.21767	+	6.47407	2.12057	1.0892
1	19512217	19512314	hen2-2_vs_col-0	2.78158	-	3.47303	2.46559	1.3362
1	19512461	19512951	hen2-2_vs_col-0	2.4136	-	8.16366	6.22367	4.26185
1	19514878	19515036	hen2-2_vs_col-0	7.23281	+	3.60512	2.70389	1.42768
1	19517334	19517436	hen2-2_vs_col-0	1.5117	-	11.0229	2.54107	1.38885
1	19517467	19517529	hen2-2_vs_col-0	9.60177	-	2.64626	2.01477	1.03865
1	19517531	19517626	hen2-2_vs_col-0	2.10468	-	4.55952	2.47852	1.34488
1	19517704	19517939	hen2-2_vs_col-0	3.23869	-	5.02694	4.82573	3.06734
1	19546525	19546624	hen2-2_vs_col-0	1.9299	-	4.27429	2.06323	1.07235
1	19603278	19603698	hen2-2_vs_col-0	3.91331	+	8.84035	4.33706	2.36315
1	19609800	19609904	hen2-2_vs_col-0	1.27506	-	5.72109	2.05011	1.06384
1	19610236	19610380	hen2-2_vs_col-0	1.23213	-	8.17488	2.58668	1.42237
1	19630962	19631270	hen2-2_vs_col-0	1.56056	-	11.6509	4.27428	2.62494
1	19631800	19631911	hen2-2_vs_col-0	1.48513	-	6.65625	2.45957	1.33143
1	19632017	19632121	hen2-2_vs_col-0	1.50545	-	7.74354	2.54379	1.39065
1	19632219	19632287	hen2-2_vs_col-0	1.35093	-	6.66046	2.59908	1.43086
1	19633017	19633128	hen2-2_vs_col-0	1.50763	-	11.0842	3.18585	1.84184
1	19633336	19633434	hen2-2_vs_col-0	1.53786	-	9.84921	2.45407	1.32788
1	19633474	19633691	hen2-2_vs_col-0	1.9657	-	6.72248	4.34861	2.68781
1	19633794	19633995	hen2-2_vs_col-0	3.58216	-	3.54703	3.21041	1.8601
1	19641599	19641880	hen2-2_vs_col-0	1.49471	+	10.728	2.71818	1.4369
1	19641921	19641951	hen2-2_vs_col-0	5.53819	-	3.5	2.39059	1.28598
1	19662057	19663297	hen2-2_vs_col-0	2.29847	+	14.3538	5.06197	2.69636
1	19682440	19682511	hen2-2_vs_col-0	7.89118	+	3.54762	2.5302	1.33391
1	19682850	19683069	hen2-2_vs_col-0	1.15428	-	14.3136	3.38294	1.98164
1	19683118	19683195	hen2-2_vs_col-0	5.54989	+	3.15476	2.21179	1.14586
1	19706171	19706397	hen2-2_vs_col-0	6.16099	-	3.2876	3.87537	2.32967
1	19706401	19706477	hen2-2_vs_col-0	inf	-	2.85343	2.76898	1.54552
1	19729821	19730567	hen2-2_vs_col-0	3.28372	-	43.5028	6.22367	4.26185
1	19730177	19730465	hen2-2_vs_col-0	3.12533	+	4.74765	2.89511	1.53182
1	19740030	19740126	hen2-2_vs_col-0	4.07742	-	3.46318	2.70424	1.50125
1	19740306	19740774	hen2-2_vs_col-0	2.15896	-	33.5049	5.26943	3.43459
1	19761705	19762530	hen2-2_vs_col-0	1.12552	-	21.7831	6.22367	4.26185
1	19764780	19764877	hen2-2_vs_col-0	2.53972	+	3.83455	2.11548	1.08662
1	19776247	19776416	hen2-2_vs_col-0	2.19892	-	4.12773	3.00856	1.71895
1	19776466	19776694	hen2-2_vs_col-0	2.87162	-	4.7199	4.6796	2.93963
1	19783366	19783435	hen2-2_vs_col-0	5.6296	-	3.04082	2.60531	1.43552
1	19787020	19787162	hen2-2_vs_col-0	1.37181	-	8.32468	2.50758	1.36638
1	19788011	19788278	hen2-2_vs_col-0	1.22071	-	7.52319	3.84165	2.29909
1	19788301	19788576	hen2-2_vs_col-0	1.04761	-	8.76553	2.89918	1.64188
1	19790254	19790632	hen2-2_vs_col-0	1.26713	+	34.3078	2.6523	1.40123
1	19821233	19821748	hen2-2_vs_col-0	2.59166	+	16.5075	3.81608	2.07508
1	19821860	19822295	hen2-2_vs_col-0	1.61201	+	9.51851	3.11559	1.64624
1	19849870	19850223	hen2-2_vs_col-0	4.9327	+	13.7532	4.42004	2.40315
1	19863583	19863800	hen2-2_vs_col-0	1.63764	+	5.85616	2.49458	1.31391
1	19864346	19864510	hen2-2_vs_col-0	2.51231	+	5.40779	2.85142	1.50995
1	19864537	19864592	hen2-2_vs_col-0	1.9083	+	5.36607	2.33249	1.21721
1	19902513	19903287	hen2-2_vs_col-0	1.13963	+	36.5831	3.36501	1.77874
1	19903409	19903734	hen2-2_vs_col-0	1.35664	+	19.3539	2.90898	1.53712
1	19916131	19916281	hen2-2_vs_col-0	1.35309	-	5.20577	2.52305	1.37753
1	19918226	19918373	hen2-2_vs_col-0	1.63289	+	12.0526	2.45866	1.29279
1	19935224	19935695	hen2-2_vs_col-0	3.15401	-	7.58777	6.22367	4.26185
1	19950327	19950847	hen2-2_vs_col-0	1.06773	-	14.1121	4.76127	3.01635
1	19954484	19954614	hen2-2_vs_col-0	3.36183	+	3.17993	2.36253	1.23133
1	19954703	19954786	hen2-2_vs_col-0	4.32148	+	2.85629	1.986	1.00606
1	19963167	19963287	hen2-2_vs_col-0	1.1267	+	9.88902	2.25106	1.16968
1	19981511	19982498	hen2-2_vs_col-0	1.79823	+	43.111	4.20743	2.29229
1	19991720	19991943	hen2-2_vs_col-0	3.28211	+	3.73214	2.63948	1.39609
1	20001849	20002032	hen2-2_vs_col-0	1.60217	+	6.61646	2.15493	1.10895
1	20017425	20017797	hen2-2_vs_col-0	1.23392	-	12.5904	4.34861	2.68781
1	20023656	20023731	hen2-2_vs_col-0	1.39412	-	5.59586	2.27006	1.20892
1	20056966	20056993	hen2-2_vs_col-0	5.30986	-	3.42347	2.17063	1.14255
1	20056995	20057300	hen2-2_vs_col-0	4.95821	-	3.98459	4.76127	3.01635
1	20057309	20059436	hen2-2_vs_col-0	4.81787	-	6.92182	6.22367	4.26185
1	20100003	20100227	hen2-2_vs_col-0	1.38487	-	6.17048	3.64275	2.16928
1	20100249	20100472	hen2-2_vs_col-0	1.42725	-	7.4375	3.92482	2.36636
1	20110773	20110878	hen2-2_vs_col-0	4.31559	-	3.53706	2.32107	1.24171
1	20111062	20111668	hen2-2_vs_col-0	2.09728	-	21.1353	6.22367	4.26185
1	20111696	20111827	hen2-2_vs_col-0	3.32363	-	5.05898	3.65196	2.17582
1	20111829	20111960	hen2-2_vs_col-0	3.44586	-	5.18885	3.59733	2.13308
1	20112347	20112579	hen2-2_vs_col-0	4.94944	-	5.94543	6.22367	4.26185
1	20112699	20112872	hen2-2_vs_col-0	3.82271	-	3.56979	2.62412	1.44722
1	20113354	20113377	hen2-2_vs_col-0	inf	-	3.65774	2.98688	1.70419
1	20113405	20113747	hen2-2_vs_col-0	4.26327	-	4.49334	5.74655	3.87113
1	20115031	20115684	hen2-2_vs_col-0	4.14025	-	9.00131	6.22367	4.26185
1	20120045	20120220	hen2-2_vs_col-0	3.59753	-	4.81331	3.28665	1.91054
1	20120318	20120517	hen2-2_vs_col-0	5.32086	-	4.44821	3.84892	2.30584
1	20122117	20122847	hen2-2_vs_col-0	1.30683	-	25.3518	5.74655	3.87113
1	20122676	20123052	hen2-2_vs_col-0	1.61197	+	9.66825	3.02762	1.60224
1	20123677	20123883	hen2-2_vs_col-0	1.72504	-	5.48861	3.49047	2.05724
1	20123843	20124100	hen2-2_vs_col-0	3.78288	+	5.64092	3.34532	1.76682
1	20124519	20124838	hen2-2_vs_col-0	1.68139	+	9.42054	3.02885	1.60224
1	20132997	20133191	hen2-2_vs_col-0	1.09437	+	19.3418	2.05275	1.04718
1	20158210	20158477	hen2-2_vs_col-0	3.12088	-	4.76946	3.42918	2.01221
1	20158721	20159189	hen2-2_vs_col-0	3.59507	+	6.58803	4.05206	2.18474
1	20172212	20172375	hen2-2_vs_col-0	4.83172	-	4.17247	3.34919	1.95423
1	20172788	20173144	hen2-2_vs_col-0	5.16429	-	20.0818	6.22367	4.26185
1	20173337	20173921	hen2-2_vs_col-0	3.49779	-	43.4576	6.22367	4.26185
1	20179478	20180326	hen2-2_vs_col-0	3.12708	+	6.23633	5.06197	2.69636
1	20199458	20199662	hen2-2_vs_col-0	1.16122	+	46.5836	2.1192	1.08819
1	20236714	20236822	hen2-2_vs_col-0	1.52983	-	4.55242	2.03929	1.05677
1	20236836	20237072	hen2-2_vs_col-0	3.1936	-	3.82037	4.4678	2.77292
1	20236999	20237208	hen2-2_vs_col-0	1.27763	+	8.03571	2.28779	1.18997
1	20255045	20255209	hen2-2_vs_col-0	1.56181	+	18.3446	2.4565	1.29112
1	20256455	20256550	hen2-2_vs_col-0	1.09465	+	16.0677	2.30957	1.20274
1	20260263	20260492	hen2-2_vs_col-0	3.24055	+	129.073	3.28999	1.74322
1	20269805	20269903	hen2-2_vs_col-0	1.70371	-	4.89322	2.3748	1.27529
1	20286013	20286054	hen2-2_vs_col-0	4.78382	-	3.10714	2.04819	1.0625
1	20309132	20309284	hen2-2_vs_col-0	1.09761	-	8.04202	1.97123	1.0089
1	20309769	20310022	hen2-2_vs_col-0	2.02979	+	17.9336	3.05173	1.61138
1	20310039	20310102	hen2-2_vs_col-0	3.95378	+	6.20424	2.57374	1.35879
1	20310707	20310834	hen2-2_vs_col-0	5.06528	+	3.07868	2.35055	1.22639
1	20343320	20343397	hen2-2_vs_col-0	1.52863	-	5.23352	2.63094	1.45179
1	20367681	20368412	hen2-2_vs_col-0	1.34619	-	12.3341	5.10973	3.31757
1	20408705	20409631	hen2-2_vs_col-0	1.4778	-	15.3798	6.22367	4.26185
1	20409761	20410111	hen2-2_vs_col-0	1.13949	-	26.9011	4.17059	2.55943
1	20410211	20410765	hen2-2_vs_col-0	1.15684	-	18.5185	4.65547	2.91876
1	20410947	20411311	hen2-2_vs_col-0	1.20451	-	24.3996	4.4678	2.77292
1	20411320	20411551	hen2-2_vs_col-0	1.11687	-	24.4076	3.671	2.18218
1	20414362	20414463	hen2-2_vs_col-0	1.29903	-	5.7556	2.2459	1.19209
1	20414472	20414658	hen2-2_vs_col-0	1.22451	+	14.5222	2.4069	1.25925
1	20431232	20431386	hen2-2_vs_col-0	2.02735	-	8.86175	4.17835	2.56413
1	20431497	20431687	hen2-2_vs_col-0	1.13701	-	15.8706	3.96599	2.39882
1	20446830	20446892	hen2-2_vs_col-0	inf	+	2.70975	2.16185	1.11364
1	20446912	20446994	hen2-2_vs_col-0	inf	-	2.76162	2.35886	1.26364
1	20447100	20448547	hen2-2_vs_col-0	4.54035	-	41.0966	6.22367	4.26185
1	20457474	20458036	hen2-2_vs_col-0	2.05465	-	9.66734	5.74655	3.87113
1	20458347	20458462	hen2-2_vs_col-0	1.98928	-	7.96059	3.09366	1.78474
1	20459033	20459260	hen2-2_vs_col-0	1.60503	+	70.244	2.36093	1.23031
1	20459474	20459850	hen2-2_vs_col-0	1.43367	+	74.7539	2.63948	1.39609
1	20459934	20460224	hen2-2_vs_col-0	1.36549	+	76.9374	2.49422	1.31391
1	20460395	20460643	hen2-2_vs_col-0	1.22935	+	46.718	2.1784	1.1255
1	20506067	20506207	hen2-2_vs_col-0	1.63898	+	5.11702	2.01278	1.02144
1	20517225	20517401	hen2-2_vs_col-0	-1.76227	+	9.25787	2.44408	1.28405
1	20562630	20563085	hen2-2_vs_col-0	1.08097	-	40.157	4.17835	2.56413
1	20567131	20567364	hen2-2_vs_col-0	-1.50779	+	12.3748	2.49512	1.31391
1	20567455	20567903	hen2-2_vs_col-0	-1.72031	+	11.2098	3.23789	1.70843
1	20568040	20568198	hen2-2_vs_col-0	-1.83307	+	12.668	2.66123	1.40477
1	20568339	20568595	hen2-2_vs_col-0	-1.8298	+	11.3277	2.98307	1.58304
1	20568705	20568795	hen2-2_vs_col-0	-1.65167	+	12.2049	2.03006	1.03221
1	20568926	20569093	hen2-2_vs_col-0	-1.61001	+	10.3295	2.41481	1.26388
1	20577631	20578124	hen2-2_vs_col-0	3.23269	+	19.9056	4.33706	2.36315
1	20580331	20580584	hen2-2_vs_col-0	1.32417	+	23.3231	2.59716	1.37129
1	20582215	20582368	hen2-2_vs_col-0	1.12838	+	13.4893	1.98995	1.00867
1	20604974	20605525	hen2-2_vs_col-0	1.21794	+	24.6968	3.02332	1.59972
1	20605912	20606054	hen2-2_vs_col-0	1.31153	+	22.9221	2.09489	1.07206
1	20612143	20612210	hen2-2_vs_col-0	4.14662	-	3.06618	2.69232	1.49406
1	20612213	20612362	hen2-2_vs_col-0	9.2798	-	3.55762	4.76127	3.01635
1	20615699	20615996	hen2-2_vs_col-0	5.06253	-	8.8931	5.74655	3.87113
1	20633100	20633420	hen2-2_vs_col-0	1.54151	+	7.71406	2.64507	1.39731
1	20635577	20635725	hen2-2_vs_col-0	1.19809	+	9.81831	2.32472	1.21309
1	20647045	20647568	hen2-2_vs_col-0	4.15301	-	11.6952	6.22367	4.26185
1	20647554	20648706	hen2-2_vs_col-0	1.85263	+	25.3411	4.46834	2.41524
1	20670343	20670424	hen2-2_vs_col-0	5.1615	-	3.36498	2.1588	1.13484
1	20802585	20802664	hen2-2_vs_col-0	3.86168	+	3.5375	2.35224	1.22656
1	20803848	20804332	hen2-2_vs_col-0	4.22667	+	34.0417	4.85369	2.62071
1	20836488	20836577	hen2-2_vs_col-0	1.07045	-	20.8198	2.09855	1.09624
1	20844969	20845054	hen2-2_vs_col-0	1.30661	-	10.5449	2.4407	1.31906
1	20848864	20849042	hen2-2_vs_col-0	1.20716	-	8.82003	2.70714	1.50343
1	20860625	20861270	hen2-2_vs_col-0	1.7632	+	70.9253	3.52755	1.89088
1	20864126	20864247	hen2-2_vs_col-0	1.21235	+	46.7799	2.19017	1.13435
1	20876105	20876205	hen2-2_vs_col-0	3.16211	-	3.6174	2.99195	1.70811
1	20876218	20876396	hen2-2_vs_col-0	4.18113	-	4.84238	3.97082	2.40254
1	20879836	20880081	hen2-2_vs_col-0	1.7157	+	7.8824	2.46016	1.29331
1	20910156	20910250	hen2-2_vs_col-0	4.8059	-	3.09323	2.54817	1.39376
1	20910261	20910907	hen2-2_vs_col-0	7.24858	-	12.015	6.22367	4.26185
1	20913328	20913435	hen2-2_vs_col-0	2.01091	-	4.60119	2.67308	1.4774
1	20923341	20923562	hen2-2_vs_col-0	1.09097	-	7.4971	3.36815	1.9706
1	20923706	20923821	hen2-2_vs_col-0	1.39079	-	6.30542	2.34809	1.2573
1	20942463	20943072	hen2-2_vs_col-0	1.54882	+	10.7407	3.21926	1.69542
1	20946788	20947801	hen2-2_vs_col-0	1.43631	+	14.6277	3.71803	2.00043
1	20947730	20949264	hen2-2_vs_col-0	1.00085	-	29.4076	6.22367	4.26185
1	20948777	20948936	hen2-2_vs_col-0	3.92168	+	3.77902	2.63621	1.39457
1	20992620	20992731	hen2-2_vs_col-0	1.44451	-	6.77168	2.53694	1.38698
1	21007564	21007809	hen2-2_vs_col-0	2.64467	+	5.69077	3.23192	1.70485
1	21010931	21010992	hen2-2_vs_col-0	1.05623	-	20.6198	1.97469	1.01109
1	21024776	21024904	hen2-2_vs_col-0	2.07962	+	23.9092	2.67746	1.41124
1	21036101	21036216	hen2-2_vs_col-0	3.61872	-	2.87931	2.33577	1.25001
1	21043038	21043375	hen2-2_vs_col-0	2.8315	-	5.3732	4.22804	2.59884
1	21043381	21043492	hen2-2_vs_col-0	3.34947	-	3.92602	3.42779	2.01159
1	21043495	21044750	hen2-2_vs_col-0	4.10214	-	31.058	6.22367	4.26185
1	21051856	21053157	hen2-2_vs_col-0	3.1149	-	111.507	6.22367	4.26185
1	21078794	21079268	hen2-2_vs_col-0	1.15334	-	200.449	4.76127	3.01635
1	21079271	21079490	hen2-2_vs_col-0	1.15502	-	123.334	3.0879	1.7802
1	21079580	21080382	hen2-2_vs_col-0	1.22143	-	178.949	5.74655	3.87113
1	21082576	21082836	hen2-2_vs_col-0	1.37391	+	8.70799	2.57331	1.35879
1	21085647	21085834	hen2-2_vs_col-0	1.3806	-	13.1349	4.25519	2.61179
1	21085919	21086144	hen2-2_vs_col-0	1.3867	-	17.0218	4.34861	2.68781
1	21086226	21086305	hen2-2_vs_col-0	1.6595	-	14.8464	2.80454	1.57252
1	21086387	21086495	hen2-2_vs_col-0	1.55501	-	10.7182	2.2017	1.16314
1	21166968	21167013	hen2-2_vs_col-0	3.60143	-	3.40683	2.16627	1.13929
1	21187088	21187188	hen2-2_vs_col-0	1.60355	-	4.84724	2.49023	1.35273
1	21187416	21187693	hen2-2_vs_col-0	3.7962	+	4.36588	3.34532	1.76682
1	21188070	21188210	hen2-2_vs_col-0	1.50345	-	10.7984	2.36543	1.26817
1	21197559	21197742	hen2-2_vs_col-0	2.22835	-	4.30862	2.91725	1.65505
1	21198076	21198266	hen2-2_vs_col-0	1.13077	-	10.9447	3.4264	2.01137
1	21208149	21208469	hen2-2_vs_col-0	1.99006	-	13.8587	5.18228	3.36736
1	21208617	21208796	hen2-2_vs_col-0	2.46788	-	5.98016	3.60353	2.13841
1	21211994	21212316	hen2-2_vs_col-0	1.64845	+	12.9536	2.89739	1.53182
1	21225925	21226075	hen2-2_vs_col-0	1.70786	-	5.90161	2.54162	1.38885
1	21226640	21226888	hen2-2_vs_col-0	1.59211	-	6.02811	3.6543	2.17582
1	21233773	21234209	hen2-2_vs_col-0	1.28036	-	22.8428	4.34861	2.68781
1	21233947	21235193	hen2-2_vs_col-0	4.38133	+	7.24104	5.06197	2.69636
1	21234299	21234428	hen2-2_vs_col-0	1.61198	-	20.3214	2.78229	1.55558
1	21237990	21238182	hen2-2_vs_col-0	inf	-	2.92931	3.14053	1.81045
1	21238208	21238735	hen2-2_vs_col-0	7.78006	-	6.03382	4.42433	2.75317
1	21253739	21253968	hen2-2_vs_col-0	1.96337	+	11.1522	2.66416	1.40508
1	21341568	21341622	hen2-2_vs_col-0	inf	-	3.05455	2.1762	1.14636
1	21341738	21342088	hen2-2_vs_col-0	inf	-	5.06207	6.22367	4.26185
1	21405796	21405911	hen2-2_vs_col-0	1.13026	-	11.295	2.92722	1.663
1	21424597	21424786	hen2-2_vs_col-0	5.96483	-	4.05564	4.26463	2.61728
1	21424911	21425562	hen2-2_vs_col-0	3.81498	-	51.8564	6.22367	4.26185
1	21425002	21425806	hen2-2_vs_col-0	3.30341	+	14.8085	4.68455	2.60014
1	21429854	21430009	hen2-2_vs_col-0	3.36453	+	3.48718	2.32729	1.21511
1	21530002	21530068	hen2-2_vs_col-0	1.8141	-	4.40085	2.26506	1.2053
1	21530080	21530310	hen2-2_vs_col-0	1.81708	-	5.90847	4.34861	2.68781
1	21530597	21530739	hen2-2_vs_col-0	1.53166	+	11.8951	2.26588	1.17861
1	21531238	21531507	hen2-2_vs_col-0	1.41276	-	9.12222	3.23289	1.87381
1	21532629	21532669	hen2-2_vs_col-0	4.5228	-	3.42683	2.43289	1.31264
1	21532661	21533231	hen2-2_vs_col-0	4.17449	+	30.9122	4.42004	2.40315
1	21532806	21533180	hen2-2_vs_col-0	6.34014	-	8.63905	6.22367	4.26185
1	21536151	21536751	hen2-2_vs_col-0	1.60173	+	10.3932	3.17548	1.67474
1	21539768	21539952	hen2-2_vs_col-0	1.04567	-	102.257	4.42433	2.75317
1	21540644	21540851	hen2-2_vs_col-0	1.07722	-	14.4519	2.84292	1.60034
1	21542801	21542974	hen2-2_vs_col-0	1.00905	+	27.5226	1.99239	1.00989
1	21560707	21561267	hen2-2_vs_col-0	1.29942	-	14.0122	5.18228	3.36736
1	21579868	21580437	hen2-2_vs_col-0	4.14471	+	26.5732	4.89716	2.64669
1	21611583	21611682	hen2-2_vs_col-0	1.13708	-	7.07286	2.14612	1.12716
1	21611725	21612169	hen2-2_vs_col-0	4.52523	+	5.78106	3.68037	1.98957
1	21612201	21612587	hen2-2_vs_col-0	4.29965	+	10.3697	4.46834	2.41524
1	21612711	21613390	hen2-2_vs_col-0	3.62919	+	5.63319	4.21687	2.2962
1	21616062	21617274	hen2-2_vs_col-0	2.82338	-	22.9878	6.22367	4.26185
1	21616526	21617293	hen2-2_vs_col-0	2.37298	+	15.3416	4.18028	2.2706
1	21617635	21617911	hen2-2_vs_col-0	5.40021	-	6.53249	6.22367	4.26185
1	21617944	21618100	hen2-2_vs_col-0	5.98953	-	4.7566	3.90352	2.34936
1	21646856	21647112	hen2-2_vs_col-0	4.1944	+	3.65981	3.14048	1.65711
1	21653028	21653257	hen2-2_vs_col-0	1.06392	+	11.9171	2.51136	1.32246
1	21654535	21654787	hen2-2_vs_col-0	1.11216	+	8.66206	2.76784	1.46629
1	21678827	21678883	hen2-2_vs_col-0	4.02251	-	3.35088	2.31825	1.24082
1	21696279	21696569	hen2-2_vs_col-0	1.16172	-	8.65169	3.29887	1.91602
1	21696754	21696882	hen2-2_vs_col-0	1.15846	-	8.49391	2.67259	1.47715
1	21697158	21697303	hen2-2_vs_col-0	1.13472	-	7.74706	2.53321	1.38493
1	21702578	21702754	hen2-2_vs_col-0	1.10023	-	6.8866	2.48481	1.34935
1	21703135	21703281	hen2-2_vs_col-0	1.00597	-	6.70214	2.19767	1.16171
1	21732804	21733421	hen2-2_vs_col-0	3.83239	+	65.2462	4.94546	2.64669
1	21741967	21742368	hen2-2_vs_col-0	4.26567	+	10.1679	4.31259	2.35108
1	21742373	21742777	hen2-2_vs_col-0	4.65336	+	7.7619	4.33706	2.36315
1	21742783	21742912	hen2-2_vs_col-0	4.19797	+	2.82857	2.14173	1.10075
1	21742968	21743974	hen2-2_vs_col-0	1.2278	-	39.7716	6.22367	4.26185
1	21746500	21750429	hen2-2_vs_col-0	1.38006	+	47.1529	5.33081	2.69636
1	21750431	21753436	hen2-2_vs_col-0	1.39616	+	35.0019	5.13452	2.69636
1	21754089	21755005	hen2-2_vs_col-0	1.67407	+	85.2145	3.70904	2.00008
1	21760241	21760618	hen2-2_vs_col-0	-1.02576	+	135.139	2.50409	1.31972
1	21760620	21761013	hen2-2_vs_col-0	-1.08362	+	95.8609	2.51287	1.32284
1	21798202	21798336	hen2-2_vs_col-0	1.84904	+	5.05556	2.23915	1.16038
1	21798339	21798480	hen2-2_vs_col-0	1.87607	+	10.7817	2.67199	1.40863
1	21833306	21837319	hen2-2_vs_col-0	1.95791	+	23.0612	6.17591	3.10351
1	21837359	21837860	hen2-2_vs_col-0	2.72419	+	9.62351	3.27774	1.74039
1	21888248	21888380	hen2-2_vs_col-0	1.20533	-	8.02685	2.40736	1.29491
1	21979620	21980383	hen2-2_vs_col-0	1.83431	+	42.3082	3.98558	2.16845
1	21998469	21998520	hen2-2_vs_col-0	inf	-	3.00412	2.63855	1.45624
1	22032182	22032284	hen2-2_vs_col-0	2.64499	+	3.84882	2.08513	1.0644
1	22032488	22032742	hen2-2_vs_col-0	2.00945	+	5.56975	2.9898	1.5833
1	22032771	22032940	hen2-2_vs_col-0	1.5903	+	6.37059	2.61279	1.38218
1	22033021	22033306	hen2-2_vs_col-0	1.9299	+	5.33167	2.73046	1.44535
1	22033333	22033499	hen2-2_vs_col-0	2.4316	+	4.84132	2.33224	1.21721
1	22084837	22084954	hen2-2_vs_col-0	1.29685	-	5.77966	2.29003	1.22163
1	22085871	22085998	hen2-2_vs_col-0	1.60245	-	6.03237	2.79182	1.56296
1	22086252	22086358	hen2-2_vs_col-0	2.23386	-	4.29506	2.73245	1.52081
1	22086533	22086736	hen2-2_vs_col-0	1.70571	-	6.46148	3.71447	2.21259
1	22087087	22087234	hen2-2_vs_col-0	1.60694	-	4.57915	2.45186	1.32612
1	22087575	22087810	hen2-2_vs_col-0	2.02854	-	8.48547	4.01148	2.43597
1	22087865	22088121	hen2-2_vs_col-0	1.42442	-	12.973	3.66858	2.18067
1	22093459	22093487	hen2-2_vs_col-0	4.75581	+	4.00246	2.02513	1.0286
1	22095317	22096180	hen2-2_vs_col-0	3.55081	+	18.1	5.06197	2.69636
1	22112546	22112688	hen2-2_vs_col-0	1.09325	-	16.9371	2.41257	1.29837
1	22180936	22181092	hen2-2_vs_col-0	1.82606	-	6.65514	3.2215	1.86649
1	22197948	22197996	hen2-2_vs_col-0	5.946	-	3.37901	2.60364	1.43407
1	22198081	22199847	hen2-2_vs_col-0	3.96655	-	6.17714	6.22367	4.26185
1	22199850	22200258	hen2-2_vs_col-0	3.61542	-	6.66504	5.74655	3.87113
1	22224062	22224130	hen2-2_vs_col-0	1.34101	-	9.34161	2.09517	1.09362
1	22247722	22247882	hen2-2_vs_col-0	1.30554	-	9.98403	2.33611	1.25007
1	22247914	22248482	hen2-2_vs_col-0	1.01185	-	10.2597	4.22804	2.59884
1	22248540	22249149	hen2-2_vs_col-0	1.05017	-	12.3144	4.11987	2.51475
1	22262083	22262217	hen2-2_vs_col-0	1.17924	+	5.74497	2.15842	1.1117
1	22354109	22354283	hen2-2_vs_col-0	1.14477	-	5.84816	2.45763	1.33004
1	22386749	22387065	hen2-2_vs_col-0	2.07875	+	9.18567	3.10884	1.64341
1	22387072	22387280	hen2-2_vs_col-0	2.07262	+	8.09091	3.05043	1.61138
1	22387333	22387703	hen2-2_vs_col-0	1.09849	-	67.8252	4.76127	3.01635
1	22470267	22470378	hen2-2_vs_col-0	1.04138	-	5.79847	2.44733	1.32392
1	22486829	22487140	hen2-2_vs_col-0	1.26476	+	18.1696	2.63122	1.39249
1	22487501	22487772	hen2-2_vs_col-0	1.55211	+	15.229	2.56621	1.35333
1	22487963	22488072	hen2-2_vs_col-0	1.34966	+	10.3299	2.02463	1.02844
1	22555721	22556381	hen2-2_vs_col-0	1.55972	+	11.2995	3.66403	1.98957
1	22556432	22556936	hen2-2_vs_col-0	1.87785	+	7.22716	3.20883	1.69273
1	22576447	22576802	hen2-2_vs_col-0	2.9597	+	8.01685	3.45907	1.84634
1	22576932	22577367	hen2-2_vs_col-0	2.47682	+	5.20364	3.27664	1.74039
1	22581520	22581915	hen2-2_vs_col-0	2.98272	-	6.32197	6.22367	4.26185
1	22589573	22589645	hen2-2_vs_col-0	1.68726	-	5.45108	1.97045	1.00849
1	22603263	22604125	hen2-2_vs_col-0	1.98908	+	46.114	4.04558	2.18474
1	22604128	22604305	hen2-2_vs_col-0	1.43683	+	12.0084	2.036	1.03515
1	22604664	22604962	hen2-2_vs_col-0	1.66832	+	15.468	2.85764	1.51322
[truncated: 9,020 more rows]
