# Supplementary material for: Nanopore direct RNA sequencing maps the complexity of Arabidopsis mRNA processing and m6A modification
Source: eLife. 2020 Jan 14;9:e49658. doi: 10.7554/eLife.49658 (PMC6959997; doi:10.7554/eLife.49658)
Supplement: Figure 2—figure supplement 1—source data 2. [file elife-49658-fig2-figsupp1-data2.tds]

chrom	start	end	gene_id	score	strand	nreads	median_polya	ci95_lower	ci95_upper
1	6787	9130	AT1G01020	0.8672030029000001	-	31	151.27999880000002	45.11499977	241.767498
1	23120	31227	AT1G01040	0.03535128897	+	16	162.659996	47.92375135	318.3849945
1	31169	33171	AT1G01050	0.5283144145	-	154	72.75499725	15.28875031	257.0770035
1	33364	37871	AT1G01060	0.0022455391450000002	-	95	82.84999847	13.18049984	202.9690025
1	44969	47059	AT1G01080	1.059018097	-	127	98.51999664	16.42199974	196.7104996
1	47233	49304	AT1G01090	0.8690036351	-	358	82.96500015	18.14774971	217.48524590000002
1	49908	51210	AT1G01100	0.7534462590000001	-	1580	56.61000061	13.22324989	171.8574986
1	51952	54737	AT1G01110	0.1143146131	+	14	81.16500092	11.70600026	149.56424980000003
1	57163	59215	AT1G01120	0.3556327104	-	161	61.65000153	13.96000004	165.0500031
1	64165	67774	AT1G01140	1.422092102	-	90	104.73500059999999	21.08525043	268.058242
1	72338	74096	AT1G01160	0.2084728157	+	86	102.9250031	16.84124947	256.5375118
1	73930	74737	AT1G01170	1.753298843	-	284	75.50500107	17.6245008	183.4920006
1	75389	76845	AT1G01180	1.227278947	+	33	77.08999634	12.103999900000002	138.3839966
1	88621	90502	AT1G01210	0.166094998	+	54	78.43500137	23.59674988	254.9480061
1	91341	95681	AT1G01220	0.17448819170000002	+	13	111.70999909999999	36.71000023	296.30400089999995
1	97411	99240	AT1G01230	0.1102039531	+	84	72.24499893	14.51275001	227.5510017
1	99864	101987	AT1G01240	1.268770488	+	111	94.20999908	16.47250009	276.9225082
1	104439	105330	AT1G01250	0.06909398027000001	-	31	42.70000076	11.66000009	96.04250336
1	108945	111699	AT1G01260	0.17340595539999998	+	46	87.63500214	22.5274992	177.37374499999999
1	114201	116407	AT1G01290	0.23374031969999998	+	40	79.875	22.83725014	272.2887444
1	116783	118845	AT1G01300	1.671144266	+	66	72.47500229	21.55750012	150.18875309999999
1	121066	130577	AT1G01320	1.637372256	-	161	98.27999878	20.52000046	249.85000609999997
1	136089	138162	AT1G01350	0.7641761817	+	23	84.33999634	26.7819994	154.7695015
1	141869	143261	AT1G01360	0.1508722049	+	34	61.85000038	17.79899964	178.1497448
1	148012	149848	AT1G01390	0.1430993949	-	16	77.65000153	36.52125025	111.352499
1	154366	156178	AT1G01420	0.1676989819	-	25	62.59000015	18.57599945	166.8219971
1	156476	158823	AT1G01430	0.05701338502	-	236	72.11999893	23.40625	175.3762436
1	159627	162953	AT1G01440	0.4547865635	-	32	125.47000120000001	30.68799887	257.4074966
1	163277	166353	AT1G01448	0.55198718	+	15	163.21000669999998	84.38799973	234.4939941
1	171524	172948	AT1G01470	1.818420233	-	326	54.12999916	11.64874971	155.84375380000003
1	180016	182749	AT1G01490	0.2705712273	-	286	75.59499741	16.292499300000003	177.3287449
1	185032	187135	AT1G01500	0.4720247776	+	63	68.26000214	12.98000016	175.1240005
1	187144	190472	AT1G01510	0.9094157436	+	70	64.56500053	17.28974953	240.62500150000002
1	190407	192436	AT1G01520	0.3375479116	+	19	74.95999908	19.57250042	156.7039993
1	195644	198787	AT1G01540	0.5807670071	+	102	114.8250008	23.04799995	265.6934959
1	199526	201775	AT1G01550	0.1388113818	+	406	76.32500076	14.44749963	184.7024994
1	221641	224351	AT1G01610	0.8612307854000001	-	131	69.68000031	26.09250021	203.36249919999997
1	225664	227543	AT1G01620	6.7146305360000005	-	1510	56.51000023	11.56350007	177.8767513
1	228798	230979	AT1G01630	0.7281008270999999	+	123	54.61000061	14.53899999	195.2044991
1	232839	237905	AT1G01650	0.1360811569	-	47	104.38999940000001	22.45899973	254.48649440000003
1	262827	266324	AT1G01710	0.9452605493999999	+	54	80.41500092	10.94874995	227.40549769999998
1	267992	269819	AT1G01720	1.508311791	+	146	81.50999832	13.70124972	300.29625699999997
1	269791	270859	AT1G01725	0.5626926342	-	47	89.41999817	25.279500199999998	181.7144958
1	270796	272189	AT1G01730	0.2447506854	+	76	67.88499832	13.59000003	155.51125530000002
1	272110	274930	AT1G01740	0.02723437921	-	11	126.5599976	42.74250126	206.47999950000002
1	278599	282891	AT1G01770	0.0923136464	+	16	142.5749969	76.56499958	226.27750209999996
1	284349	291203	AT1G01790	0.04442473443	+	77	103.0	23.03300076	249.47700350000002
1	293245	295086	AT1G01800	0.9444766834	+	132	67.61999893	12.24125004	180.64324950000002
1	296000	298334	AT1G01820	0.5181519719	-	135	74.0	13.76650009	211.83650130000004
1	298450	302310	AT1G01830	0.6252331477	-	25	78.19000244	23.21199989	122.2460007
1	304132	306310	AT1G01860	0.36052398210000003	-	24	102.7000008	22.64225087	225.76549869999997
1	310168	313130	AT1G01900	0.2314934157	+	12	50.05999947	27.03200068	90.21224804
1	313100	316090	AT1G01910	0.5866733377000001	-	70	78.47999954	14.534500099999999	259.51249390000004
1	315982	319667	AT1G01920	0.3652990647	+	19	73.20999908	18.99050045	211.1550034
1	319768	322895	AT1G01930	0.5100963833	-	21	65.84999847	14.32999992	236.5250015
1	322885	324917	AT1G01940	0.1130985706	+	46	73.27999878	13.36499977	179.21374509999998
1	325315	330619	AT1G01950	0.13752143220000002	+	26	104.954998	13.07750034	290.3475037
1	330587	337912	AT1G01960	0.01585404317	-	52	103.75	40.87175074	209.7637478
1	338240	340088	AT1G01970	0.005380475024	+	39	80.22000122	23.29249935	169.9940018
1	342917	344400	AT1G01990	0.9424278292	-	93	65.12000275	20.763000299999998	164.0599991
1	345515	347603	AT1G02000	0.1177791514	+	14	70.92000198	24.79000053	173.01149640000003
1	352611	355124	AT1G02020	0.2188078584	-	24	92.51499939	27.01874938	142.6609997
1	373334	386913	AT1G02080	1.894009517	+	39	152.16000369999998	40.49099898	361.66698610000003
1	387276	389808	AT1G02090	0.3310820239	-	60	65.52000046	16.28550007	202.23100469999997
1	389811	392816	AT1G02100	2.396804552	+	42	123.45999909999999	25.025	242.865007
1	392830	395528	AT1G02110	0.02206400347	+	28	92.13000107	27.21199961	177.7974976
1	395688	400001	AT1G02120	1.23849709	+	71	103.9000015	16.46250057	278.80999760000003
1	399982	401919	AT1G02130	0.8948970716	-	132	69.04000092	12.69749997	174.2622505
1	403099	404456	AT1G02140	0.1570791828	-	325	64.0	14.59500008	168.44299619999998
1	404599	408619	AT1G02145	0.21633521690000002	+	32	117.5900002	21.35900044	364.8847542
1	408621	410680	AT1G02150	0.2857147247	+	184	67.76499939	15.99350002	165.9604965
1	410743	411632	AT1G02160	0.08771079252999998	+	119	60.91999817	15.68550005	198.15099640000003
1	411663	413554	AT1G02170	0.01773180931	+	42	100.88000109999999	13.92450008	210.1005058
1	418415	422579	AT1G02205	0.06528751217	+	64	67.54000092	12.87650013	386.7019989
1	443117	446296	AT1G02270	0.00192130742	-	42	90.59500122	24.56875	284.3610001
1	448422	450426	AT1G02280	1.608694347	-	138	67.54500198	15.04475036	247.2600014
1	450460	452743	AT1G02290	0.5133487084	-	27	52.88000107	19.05150032	115.6535007
1	455687	458164	AT1G02305	0.3829515108	+	163	58.36000061	13.05149999	180.5134979
1	461945	463618	AT1G02330	0.20947373519999998	-	65	66.33000183	11.90600014	214.4019989
1	463753	464981	AT1G02335	1.165397282	-	25	61.91999817	20.22400055	161.86999509999998
1	465615	467880	AT1G02340	0.5755080634	-	677	87.08000183	12.32099991	198.40400390000002
1	469817	470693	AT1G02350	0.2538067106	+	65	110.9300003	24.67199974	206.0720001
1	474372	476612	AT1G02370	0.5547585976	+	19	48.84999847	13.05349984	137.3285
1	486799	489651	AT1G02400	0.21994153260000002	+	21	115.66999820000001	22.91500092	252.02499390000003
1	490859	492979	AT1G02410	0.2994747267	+	34	89.06000137	30.27824931	236.06625400000001
1	513698	515422	AT1G02475	0.1442512519	-	136	93.59999847	20.14874911	259.0300026
1	518090	520495	AT1G02500	0.04369441199	+	644	51.28499985	12.32125039	153.31475600000002
1	537739	540127	AT1G02560	2.1087135790000002	+	608	85.66999817	17.57300057	207.00874819999999
1	553018	556152	AT1G02610	0.5371377678	-	71	112.6200027	14.71749997	190.4124985
1	564017	567771	AT1G02640	0.2714240152	+	37	78.73000336	12.69700003	220.1640015
1	571825	575085	AT1G02660	0.5796895935999999	-	78	92.45000076	28.80650001	224.00449980000002
1	580624	582310	AT1G02680	0.970692585	+	39	92.41999817	17.78200088	203.8809998
1	584133	587327	AT1G02690	0.5599211725	+	14	83.68000031	47.25799923	167.2545012
1	591681	594264	AT1G02720	0.05256553571000001	+	17	70.41999817	8.498000145	136.41999819999998
1	599329	602199	AT1G02740	0.06441857767	-	19	112.16999820000001	35.37900047	193.2405029
1	602488	604387	AT1G02750	0.27303687719999997	+	18	95.59500122	11.66074989	156.71349750000002
1	607798	609534	AT1G02780	0.6251015379	-	2248	60.5	12.62524984	184.5834957
1	621452	623054	AT1G02816	0.0177381458	+	49	62.0	14.70000019	163.2140015
1	623655	624567	AT1G02820	0.4734088777	-	206	51.31999969	12.69125032	161.8700027
1	626638	629993	AT1G02840	4.904937071	+	180	141.18500519999998	16.00299976	342.2645012
1	630373	633420	AT1G02850	0.9771856219	+	42	116.18999860000001	9.731749725	236.7239983
1	635143	637262	AT1G02860	0.7518037973	+	48	102.1499977	25.17325068	337.7434975
1	637213	638681	AT1G02870	1.2339637209999998	-	74	76.79000092	14.417749599999999	186.3670055
1	642504	644903	AT1G02880	0.0026684263459999997	-	15	117.5699997	41.61800022	246.56449130000001
1	645083	652001	AT1G02890	0.44110358590000004	-	50	123.704998	18.32224975	258.57448999999997
1	653603	654457	AT1G02900	0.2657549852	-	22	56.23500061	23.44800034	166.4317505
1	655567	658216	AT1G02910	0.5547733326	-	91	78.48000336	13.86000037	268.2899971
1	661087	662475	AT1G02930	1.899665259	-	23	93.77999878	16.08100033	155.85799790000002
1	665118	666471	AT1G02950	0.1919178465	-	14	81.02000046	27.45774965	239.72924419999998
1	666806	669919	AT1G02960	0.001300698562	-	18	134.52999880000002	25.44000092	380.321508
1	681330	687385	AT1G02990	0.2834790935	-	31	115.1600037	33.79250002	249.7799988
1	687794	692660	AT1G03000	0.6055994023	-	25	148.41999819999998	62.7519989	219.1800018
1	701364	703929	AT1G03030	0.784991876	+	24	124.4449997	34.8095005	244.3830036
1	703846	706689	AT1G03040	0.027184109010000002	-	63	73.95999908	11.88949986	190.4234962
1	712439	727553	AT1G03060	0.40971617229999996	-	16	87.40999985	42.24124932	156.6850033
1	731553	738306	AT1G03080	1.48079959	-	36	96.72500229	19.69500017	252.3175011
1	739543	744184	AT1G03090	1.120348518	+	75	123.90000149999999	16.73650031	263.211499
1	748100	749034	AT1G03106	0.1508814442	-	25	58.22000122	42.20999985	226.7120026
1	749245	751976	AT1G03110	0.1926277336	+	37	87.66999817	16.38500004	205.0619995
1	753306	754262	AT1G03130	8.456996613	-	3941	59.33000183	12.25	152.32000730000001
1	754260	756303	AT1G03140	0.2997294154	-	89	79.0	14.80999966	180.4559967
1	756413	758678	AT1G03150	0.7597592515	+	48	83.76000214	12.78124995	285.297747
1	761260	766194	AT1G03160	0.4665747179	+	42	112.93500139999999	41.74750175	334.8372368
1	782903	784346	AT1G03210	0.2678863825	+	14	148.9549942	18.40700016	269.4504951
1	786831	788722	AT1G03220	3.300386174	+	106	72.25499725	13.09375	171.96374699999998
1	789819	791689	AT1G03230	0.2746738141	+	38	56.60000038	15.66950028	177.46375049999997
1	793314	795403	AT1G03250	0.2926760736	-	73	78.23999786	11.30600033	205.0080017
1	795448	798491	AT1G03260	0.05442485197000001	-	27	84.31999969	19.82600012	204.9805038
1	802969	807066	AT1G03280	0.2605220173	+	75	103.63999940000001	24.47950039	253.43599849999998
1	807360	813216	AT1G03290	0.1409814528	+	32	86.11000061	12.10174961	179.842252
1	813412	816812	AT1G03310	0.35369067299999996	+	46	90.40000153	28.67124963	175.295002
1	817933	819563	AT1G03330	0.9851689820999999	-	120	67.44499969	18.24599969	189.10750009999998
1	822581	824410	AT1G03350	0.5355716553000001	-	74	55.56999969	13.33350029	182.5307545
1	824516	826399	AT1G03360	0.2581538051	+	33	126.2300034	18.84799957	256.0399963
1	826522	830393	AT1G03365	0.02072793025	+	21	91.86000061	26.52499962	150.8250046
1	830549	835411	AT1G03370	1.820983029	+	14	146.3949966	18.99249945	213.88399730000003
1	835766	841373	AT1G03380	0.3444514075	+	47	79.59999847	15.421000099999999	198.9190002
1	842658	844251	AT1G03400	0.5844546681	-	51	62.77999878	19.57250023	170.6775017
1	844435	847683	AT1G03410	2.09148746	-	29	113.2300034	23.57800026	277.4680084
1	845676	847683	AT1G04183	0.19064219420000003	+	30	63.125	8.699249959	213.6759998
1	846663	847739	AT1G03420	0.2204592528	+	30	63.125	8.699249959	213.6759998
1	847792	849621	AT1G03430	0.27660493010000003	+	53	116.6200027	14.53900023	333.1399994
1	852150	854297	AT1G03440	0.002401620209	+	44	69.95000076	11.64549971	153.51924590000002
1	868852	871308	AT1G03475	0.9620335912000001	-	203	93.22000122	17.30300026	198.2720009
1	877860	880259	AT1G03520	0.9865685475	-	26	133.3799973	45.93124962	185.88875009999998
1	880383	883599	AT1G03530	0.6389478648	-	23	75.59999847	30.72500029	199.5514999
1	890154	892492	AT1G03560	0.7471469951	-	16	87.84499741	18.92249966	154.4474955
1	892884	894194	AT1G03580	0.8685254008	+	13	95.33000183	28.87299957	207.9900009
1	894237	897718	AT1G03590	0.3163307148	-	43	98.62000275	23.27749996	263.75750120000004
1	898479	899794	AT1G03600	0.28692254899999997	+	1690	57.68000031	13.65249999	155.5269943
1	900731	903070	AT1G03610	0.4054715919	+	146	98.65999985	28.54124928	238.18250079999999
1	907522	909650	AT1G03630	0.20939566059999998	+	478	74.18000031	16.99774995	172.6320023
1	916771	918064	AT1G03680	1.779663739	-	910	71.94499969	17.42425003	196.5434971
1	918284	920592	AT1G03687	0.24669404420000002	+	30	83.92000198	30.73299994	211.95650330000004
1	930714	931985	AT1G03730	0.8829849076999999	-	22	81.9149971	15.76650014	131.6542465
1	933425	937152	AT1G03740	0.6110480741	+	36	95.78000259	18.97750068	170.4212551
1	941061	943377	AT1G03760	0.29253617260000003	-	20	78.25	10.29150001	215.57850269999997
1	959789	960916	AT1G03820	0.24816776210000002	-	28	58.74499893	20.70025051	129.7510038
1	975870	977911	AT1G03850	0.19054169989999997	-	19	52.47999954	12.55799942	92.15099869
1	979306	982002	AT1G03860	1.470352769	-	146	80.31999969	18.32499981	231.83374980000002
1	982380	983544	AT1G03870	1.66351409	-	388	48.55999947	10.15475001	139.46050300000002
1	991105	993126	AT1G03900	1.45467539	+	143	71.91999817	13.970999999999998	189.4705017
1	996075	1000629	AT1G03910	0.20311184129999998	+	42	92.79999924	17.26875091	200.5927483
1	1004687	1008370	AT1G03930	0.1081502867	+	63	113.54000090000001	15.80550065	208.041993
1	1011150	1013365	AT1G03950	0.6400783218	-	34	105.1749992	15.82099974	207.1397457
1	1013642	1017957	AT1G03960	0.1989550698	+	13	163.08000180000002	129.3729965	296.3279938
1	1018099	1019247	AT1G03970	1.768711365	+	46	71.90500259	14.27125025	142.99125669999998
1	1027852	1029119	AT1G04000	0.008639113478	-	24	65.32500076	34.81625071	144.4135029
1	1042361	1043887	AT1G04040	0.04634387136	-	105	57.33000183	11.81399975	144.4680023
1	1050504	1051194	AT1G04070	0.6382070245	-	32	67.41999817	9.746499944	120.772249
1	1051311	1056827	AT1G04080	0.4644041453	+	63	90.95999908	12.59850025	309.9770035
1	1064263	1071080	AT1G04120	0.6293295329999999	-	30	129.8600006	32.65775037	255.89174920000002
1	1073273	1075568	AT1G04130	0.1443064598	+	23	81.06999969	20.34400053	224.9940002
1	1075542	1080630	AT1G04140	0.41519774460000003	-	118	108.0499992	17.48749983	242.6004951
1	1096881	1099901	AT1G04170	0.3544719215	+	171	74.19999695	18.68749952	215.3199997
1	1104492	1106241	AT1G04180	1.277781644	+	11	67.54000092	27.73499966	153.85499950000002
1	1106353	1108725	AT1G04190	0.2526160556	-	78	77.96499634	16.64849992	220.7857563
1	1109394	1114155	AT1G04200	0.1340413291	+	23	138.7400055	16.536999800000004	259.11550139999997
1	1114374	1119739	AT1G04210	0.6655452206	+	30	125.0549965	33.15500121	278.0740059
1	1125514	1128788	AT1G04230	0.03359044648	+	20	90.75500107	40.09500132	195.33874699999998
1	1128148	1129689	AT1G04240	0.8844032704000001	-	242	93.16000366	18.76349931	175.3120071
1	1136077	1138663	AT1G04250	1.474029482	+	249	60.0	14.52000027	200.38400269999997
1	1140277	1141564	AT1G04260	1.837236109	-	61	72.45999908	22.46000004	148.81499480000002
1	1141557	1143130	AT1G04270	4.463322884	-	1246	55.39999962	12.46750009	174.4037514
1	1143435	1147091	AT1G04280	0.660815548	-	75	88.91999817	21.91050034	201.0290001
1	1147296	1148533	AT1G04290	1.583472006	-	66	64.68000031	14.07625008	204.4350014
1	1148563	1154667	AT1G04300	0.7610014654999999	-	36	123.829998	30.53125048	218.30125049999998
1	1154739	1157813	AT1G04310	0.5766837203	-	34	91.66500092	30.81949887	216.5532455
1	1162904	1164861	AT1G04340	0.3423033232	-	47	81.5	16.37549934	188.6834946
1	1164909	1167135	AT1G04350	0.03241123797	+	147	80.63999939	16.444000199999998	236.714502
1	1185511	1188696	AT1G04400	2.64513804	-	173	89.5	16.69699955	195.31599880000002
1	1188994	1191458	AT1G04410	0.2399581728	-	1085	71.06999969	16.91099987	185.8700012
1	1191518	1193884	AT1G04420	3.0606294610000004	+	185	82.55999756	14.27400017	195.1279968
1	1197955	1201579	AT1G04430	0.20225048559999997	+	170	62.54999924	12.87650023	180.42324490000001
1	1202159	1206009	AT1G04440	0.413059169	+	64	123.4249992	21.31649997	274.9769958
1	1215924	1217471	AT1G04480	0.07472347131	+	606	71.85499954	14.75374961	183.1237545
1	1226482	1230947	AT1G04510	0.06759829999	+	63	92.40000153	19.7880002	170.6149979
1	1231451	1234032	AT1G04520	0.6439128586999999	+	20	58.98500061	17.02575037	128.5569979
1	1234175	1236206	AT1G04530	0.05101753113	-	119	78.0	12.92500005	199.68199769999998
1	1240293	1242157	AT1G04550	0.41379890700000005	+	52	89.06999969	16.69274993	197.3802544
1	1242505	1244244	AT1G04555	0.4988257101	+	20	56.375	14.24550033	106.10224879999998
1	1244946	1246059	AT1G04560	0.1322898408	+	41	72.04000092	12.03999996	166.5200043
1	1258555	1261470	AT1G04590	0.5962688598	-	43	99.33000183	21.024999899999997	202.5439934
1	1282162	1286619	AT1G04620	0.3443529811	-	15	56.16999817	37.21749897	270.3249985
1	1289733	1291112	AT1G04630	0.0005360927088000001	-	116	62.34000015	13.02749991	215.41750719999996
1	1292022	1293398	AT1G04640	0.001299514326	+	75	73.59999847	13.9929997	142.7394951
1	1303466	1307973	AT1G04680	0.8210352767	-	75	78.48000336	14.34399962	231.70000380000002
1	1313442	1315823	AT1G04690	1.217172981	+	214	62.38999939	16.03900027	202.7762482
1	1321884	1324840	AT1G04710	0.880970327	+	32	91.18999863	24.01699984	253.3672432
1	1331465	1333651	AT1G04750	0.6547146593	-	187	77.5	15.63500071	198.87850269999998
1	1336273	1337849	AT1G04770	0.01722815325	-	49	80.54000092	16.04800034	199.56399840000003
1	1340552	1343793	AT1G04780	0.3350940736	-	56	78.375	21.34999967	150.6775017
1	1344988	1348868	AT1G04790	0.3796400007	+	30	118.7399979	21.163749600000003	209.9769936
1	1348451	1349478	AT1G04800	1.364391321	-	145	40.06999969	11.59399986	151.80200200000002
1	1350079	1355466	AT1G04810	0.6059422445	+	46	112.95999909999999	34.29000092	231.99749759999997
1	1356083	1358547	AT1G04820	0.6223478536	-	759	76.0	22.65899982	171.5909966
1	1358573	1362019	AT1G04830	0.5597759346	-	37	139.78999330000002	24.63400021	287.5559875
1	1365106	1368940	AT1G04850	0.2967184594	-	99	68.22000122	16.19600024	213.42600330000002
1	1369035	1373103	AT1G04860	0.0003095056968	-	51	94.26000214	19.97250032	187.3949928
1	1373233	1375821	AT1G04870	0.00041111083139999996	-	61	73.12000275	13.98500013	180.1650009
1	1383840	1387895	AT1G04900	0.5151219897	+	16	99.40999985	19.52999973	209.8812485
1	1387870	1391381	AT1G04910	0.38295594409999995	-	28	85.99000168	34.31149979	245.599754
1	1399173	1403112	AT1G04945	1.108289915	+	150	92.47499847	25.97849989	195.1105011
1	1399181	1400830	AT1G04940	0.3957442833	+	142	91.70000076	23.02050033	195.2345001
1	1403084	1407531	AT1G04950	0.4280938258	-	26	125.0	43.79749918	273.1512508
1	1407771	1410933	AT1G04960	0.2951929168	-	58	78.03000259	16.09949965	188.8554993
1	1411087	1413627	AT1G04970	0.015580874040000001	+	46	105.24499890000001	18.84500074	219.265007
1	1413643	1416218	AT1G04980	1.88794968	-	25	127.16999820000001	9.633999634	259.8339966
1	1416341	1419027	AT1G04985	0.3997844443	-	69	70.75	14.88400011	141.3679962
1	1431176	1433010	AT1G05010	13.84482032	-	1188	68.81999969	12.75749984	187.2664959
1	1438047	1441933	AT1G05030	0.2723512612	-	26	101.63999940000001	21.50749993	257.375
1	1448630	1450901	AT1G05055	0.2385857426	-	24	81.84999847	14.67850025	141.9194965
1	1451001	1452872	AT1G05060	0.34990554840000004	-	36	52.65499878	13.60125005	141.6887474
1	1454605	1455322	AT1G05065	0.5182456921	-	11	71.20999908	32.27499914	197.9225044
1	1457006	1458802	AT1G05070	0.1404207905	-	95	70.0	12.93049984	168.285498
1	1464238	1465875	AT1G05090	0.6499576799	+	40	122.75500109999999	19.78099911	252.9245068
1	1471322	1476289	AT1G05120	1.542121424	-	22	78.72499847	16.55750008	187.2410011
1	1477486	1478900	AT1G05135	0.5936525797	-	82	28.67499924	9.742749786000001	110.307497
1	1482545	1484059	AT1G05140	0.05402605517999999	+	144	57.50499916	13.086750199999999	167.89500159999997
1	1484066	1486960	AT1G05150	0.2585825334	-	41	75.79000092	24.56999969	180.1900024
1	1490973	1494248	AT1G05170	0.05362175163	-	39	76.76000214	21.904500100000003	194.2399933
1	1498113	1501953	AT1G05180	0.8641966431999999	-	34	109.0349998	21.49049938	254.35424959999997
1	1502250	1503853	AT1G05190	0.7724281243000001	-	992	66.43000031	14.60874984	190.0187454
1	1504940	1509152	AT1G05200	0.2480700553	+	39	130.11999509999998	47.17899914	302.6395126
1	1509102	1510341	AT1G05205	0.1514193841	-	41	53.63000107	14.25	195.41999819999998
1	1510403	1511683	AT1G05210	0.01224680002	+	19	52.75999832	11.81699977	120.02150120000002
1	1512895	1518900	AT1G05230	0.6348648947	-	21	101.6999969	26.22000027	254.8050003
1	1529766	1531484	AT1G05260	0.2223060582	+	18	87.62000275	20.28025033	197.3307476
1	1531640	1534767	AT1G05270	0.8640664626000001	-	35	148.2400055	31.65700073	222.77700499999997
1	1550502	1552587	AT1G05310	0.2032458482	-	19	90.43000031	31.15350037	219.96900630000002
1	1553567	1557848	AT1G05320	0.09274446655999999	+	34	98.5	17.66925018	273.12125239999995
1	1558777	1559917	AT1G05340	0.0867942828	-	54	68.09000015	12.3412498	201.9290024
1	1560677	1564409	AT1G05350	0.9664769647	-	37	94.56999969	14.463000199999998	259.8160019
1	1564490	1567508	AT1G05360	1.32293352	+	27	162.53999330000002	42.42250061	227.7305008
1	1576821	1582672	AT1G05380	0.2266894882	+	38	90.09499741	19.76125078	279.1192612
1	1582670	1583760	AT1G05385	0.1003019918	-	51	60.59999847	23.24499941	156.5375061
1	1585370	1587794	AT1G05410	0.014588855669999998	-	30	90.81499863	22.26475039	193.18574909999998
1	1594052	1595923	AT1G05430	0.5432268107	-	62	86.99500275	17.31925044	216.7722488
1	1601147	1605034	AT1G05460	1.727989252	-	15	68.19000244	29.20699949	124.79149890000001
1	1624918	1629289	AT1G05500	0.128191199	+	69	83.38999939	16.98199997	222.75299680000003
1	1630848	1636018	AT1G05520	0.1879170741	-	45	84.87999725	13.83700037	204.5419983
1	1645299	1647435	AT1G05562	0.17769764559999998	+	23	82.5	22.16050062	130.4114979
1	1645299	1647435	AT1G05560	0.10822492689999999	-	87	51.54000092	9.803499985	142.9569988
1	1647574	1659611	AT1G05570	1.215277854	-	14	134.8099976	23.70500038	244.14550319999998
1	1669349	1671902	AT1G05590	0.2401223981	+	19	72.31999969	18.42900038	127.3424992
1	1671915	1673923	AT1G05600	0.3823737351	+	29	78.02999878	21.28699989	177.7809967
1	1678880	1681710	AT1G05620	0.15951164980000002	+	25	85.37999725	27.93000031	144.5219971
1	1682223	1687363	AT1G05630	0.9131778695999999	+	13	131.2200012	97.20899887	235.98999790000002
1	1703001	1704838	AT1G05680	0.9955076845999999	-	18	72.77500153	17.54874964	191.20249330000001
1	1706735	1709360	AT1G05690	0.2209090497	+	11	54.58000183	21.05750036	129.4449997
1	1717388	1718909	AT1G05720	0.3302377144	-	76	49.15999985	18.44124973	129.7399979
1	1726557	1728520	AT1G05780	0.4716087732	+	13	59.56000137	40.47599945	131.079998
1	1730241	1732657	AT1G05785	0.06674934191000001	+	17	99.77999878	33.62399979	200.9740051
1	1732801	1737583	AT1G05790	0.0059574215899999994	+	31	128.0800018	26.93499994	234.4724998
1	1744443	1747734	AT1G05805	0.43324028880000004	+	74	104.41999820000001	18.40324979	261.35750010000004
1	1748258	1749526	AT1G05810	0.7920559831999999	+	23	103.75	22.73900051	123.6299999
1	1754129	1761909	AT1G05830	1.033328805	+	15	160.16000369999998	66.22500153	374.08349300000003
1	1762144	1762814	AT1G05835	0.09145234914999999	+	91	60.20999908	12.84999967	153.9925041
1	1762733	1766283	AT1G05840	0.537589663	-	42	114.1049995	16.71675091	292.8160084
1	1766502	1768837	AT1G05850	4.148581429	-	1309	46.34999847	12.90800009	165.0319977
1	1768985	1771286	AT1G05860	2.290771839	+	18	110.02999879999999	27.56774926	187.75324780000003
1	1771384	1773385	AT1G05870	0.6039435296	-	80	88.17000198	15.52875016	315.45574799999997
1	1779255	1784675	AT1G05890	0.1248858739	+	75	116.3700027	19.76450043	283.4839966
1	1786848	1789737	AT1G05900	0.4991265371	+	37	152.6399994	28.65599957	284.9470062
1	1790215	1796715	AT1G05910	0.1049882786	+	24	107.38000109999999	14.14549978	217.1972485
1	1801109	1804000	AT1G05940	0.7579092295000001	-	43	82.23999786	14.23350005	264.2030045
1	1807959	1815568	AT1G05960	0.1031064209	-	24	86.90499878	27.78199964	256.38624269999997
1	1815824	1817336	AT1G05970	0.46082533789999996	-	17	73.84999847	29.34599991	228.63999330000001
1	1820253	1821887	AT1G06002	0.009080188397999999	+	11	85.40000153	27.74250078	119.4424973
1	1820307	1821894	AT1G06000	0.3377511221	-	32	57.875	25.86475024	184.92000159999998
1	1822582	1824236	AT1G06010	0.4623172315	+	47	78.83999634	23.5064992	182.5200035
1	1828339	1829983	AT1G06040	1.669950548	-	930	76.54999924	13.88799984	186.6877552
1	1832940	1834861	AT1G06060	0.5062355583	+	47	85.45999908	13.34599957	195.4314972
1	1834828	1837758	AT1G06070	0.1942075572	-	46	83.97500229	16.07500017	197.293745
1	1843462	1846311	AT1G06080	2.5700031919999997	+	672	87.65499878	18.23324962	207.8677486
1	1853058	1855378	AT1G06110	0.4706409472	-	69	106.4400024	25.40600052	212.8020035
1	1857756	1860938	AT1G06130	0.1154933399	-	43	94.40000153	32.96049919	197.9150009
1	1868988	1873730	AT1G06150	0.756938496	-	43	130.6799927	33.05799999	211.52399440000002
1	1889361	1891276	AT1G06180	0.02161721582	+	38	67.48999786	8.245500433	128.9745008
1	1892230	1894194	AT1G06190	0.6757008207999999	-	142	55.63999939	13.00950029	179.550243
1	1894288	1897027	AT1G06200	0.5710344567	-	146	64.45999908	13.56249976	165.82374950000002
1	1897128	1899237	AT1G06210	1.6853849019999998	+	62	72.35000229	15.62700002	169.3952511
1	1899950	1904897	AT1G06220	0.5324371276	+	91	106.7300034	22.99500036	259.4500046
1	1906962	1911056	AT1G06230	0.303859798	+	70	87.77000046	18.41250014	287.2730019
1	1911094	1913295	AT1G06240	0.2689546168	+	27	93.23000336	33.51599941	177.2704971
1	1922207	1926278	AT1G06290	0.3851412055	+	75	93.26000214	13.39049969	235.5959946
1	1938861	1940496	AT1G06360	0.2661229295	-	106	71.20500183	15.82749975	214.86499790000002
1	1944992	1946303	AT1G06380	0.4097729713	+	33	75.54000092	14.79400024	111.26000060000001
1	1946745	1950860	AT1G06390	0.08787219245	+	112	94.88000107	31.12850051	245.01900099999997
1	1950595	1952880	AT1G06400	0.2530570908	-	129	65.81999969	13.98400021	129.1899979
1	1954673	1958866	AT1G06410	1.7016933440000002	+	112	96.38999939	22.56824951	245.18024640000002
1	1960030	1963189	AT1G06430	1.5913724580000002	-	336	64.81999969	14.03000033	173.3812447
1	1967086	1969656	AT1G06460	1.4908288630000002	-	202	79.78499985	17.22000074	207.0727566
1	1969657	1974526	AT1G06470	0.1820683463	+	23	115.3000031	34.1880003	271.6369965
1	1989478	1990730	AT1G06500	1.014973371	+	25	85.0	33.83799973	161.21200259999998
1	1990633	1992228	AT1G06515	0.1328591666	-	82	77.30500031	22.88375082	238.01000519999997
1	1992228	1993841	AT1G06510	0.431135814	+	78	78.98500061	21.42075036	171.98125080000003
1	2001381	2002802	AT1G06530	0.5942098209000001	+	117	60.16999817	15.3210001	175.6400055
1	2003626	2007212	AT1G06550	0.1419051597	-	35	113.75	12.43099961	320.096489
1	2007614	2012006	AT1G06560	0.09954377620999999	+	27	92.76999664	16.97249942	269.91450580000003
1	2011884	2013545	AT1G06570	0.873784668	-	189	76.77999878	16.14799986	156.4919983
1	2016305	2024749	AT1G06590	0.06460870692000001	-	11	147.91999819999998	45.54999828	268.25749590000004
1	2027605	2031388	AT1G06630	0.002317956229	+	20	90.95000076	16.78475008	218.6669945
1	2031625	2034112	AT1G06640	1.153439285	+	97	63.31000137	21.5340004	305.471991
1	2034155	2035824	AT1G06645	0.18352247859999998	+	30	120.86999890000001	54.26500111	184.300996
1	2035717	2037366	AT1G06650	0.7416725155	+	111	88.5	15.75250053	195.22750469999997
1	2040409	2047655	AT1G06670	0.6620636222999999	+	40	113.88000109999999	38.95024924	212.7555042
1	2047633	2049439	AT1G06680	12.33137022	+	11096	66.23999786	14.77999973	169.5050011
1	2049399	2052170	AT1G06690	0.40766389090000005	-	162	91.61499786	25.78049998	198.65999340000002
1	2052369	2055548	AT1G06700	0.006055673346	-	144	87.26499939	12.70724974	242.5292503
1	2060443	2067483	AT1G06720	0.4783817475	-	30	117.4099998	36.59349995	184.3605038
1	2067508	2070455	AT1G06730	1.324217184	+	22	100.38999940000001	27.34625092	194.7237514
1	2076503	2077767	AT1G06760	0.3508977514	-	407	61.45999908	13.36050034	138.5129959
1	2078879	2082097	AT1G06770	0.18841255210000002	-	11	114.72000120000001	30.54999971	197.1024971
1	2083310	2087141	AT1G06780	0.006100228292000001	+	19	102.0	27.94149895	184.9495003
1	2087181	2089786	AT1G06790	0.20337685739999997	+	21	73.25	10.15999973	207.9950027
1	2092945	2096784	AT1G06820	0.015395011630000002	-	51	91.12999725	18.34749985	238.7874985
1	2097746	2103507	AT1G06840	0.07055098733	-	16	116.4449997	24.36875057	293.3825016
1	2105047	2106749	AT1G06850	0.30512117	+	15	90.30000305	47.52049847	198.2234985
1	2108511	2110986	AT1G06870	0.043106331330000004	+	22	69.97500229	22.65524979	261.9675041
1	2111322	2114686	AT1G06890	0.5914379128	-	71	83.72000122	15.08749938	186.6625061
1	2114764	2120745	AT1G06900	1.226111937	-	36	137.4599991	45.91374922	283.4975052
1	2130052	2135703	AT1G06950	0.5278131718	-	148	103.83499909999999	36.48225012	191.5447449
1	2135809	2137838	AT1G06960	0.7530441839	+	41	88.48000336	32.88000107	246.7799988
1	2142938	2143977	AT1G06980	0.08651790212999999	-	13	67.95999908	16.44600019	101.55600129999999
1	2152797	2155269	AT1G07010	0.6684949064	+	113	93.29000092	14.48199997	218.5140015
1	2155212	2156153	AT1G07020	0.398874557	-	31	61.56999969	10.20249987	162.0249977
1	2158412	2160818	AT1G07030	0.09968183048000001	-	53	80.26000214	24.52399998	145.8439987
1	2160918	2163387	AT1G07040	0.9758854011	-	53	93.77999878	16.53499994	201.6859985
1	2168560	2169957	AT1G07070	0.2946721846	+	42	61.75500107	23.56400089	198.3144993
1	2169976	2172194	AT1G07080	1.861402408	+	276	53.76999855	16.6299994	179.08999440000002
1	2173951	2174894	AT1G07090	0.1387159361	-	50	70.44000244	11.36750019	216.3812511
1	2178021	2184193	AT1G07110	0.8462031640000001	-	131	84.72000122	16.232499599999997	224.41500469999997
1	2187565	2188734	AT1G07128	0.10149017449999999	-	13	45.93999863	17.08200073	128.0960052
1	2189876	2190784	AT1G07135	0.4895436811	-	15	72.43000031	36.76649857	157.4960022
1	2191678	2193836	AT1G07140	2.024952859	-	298	60.86000061	13.84849994	172.76824299999998
1	2199996	2201272	AT1G07170	0.1413404402	+	78	76.59000015	15.68149996	193.43900530000002
1	2204103	2207099	AT1G07180	1.430965077	+	237	66.13999939	15.384000400000001	174.0059937
1	2208476	2212718	AT1G07200	0.052070267860000005	-	14	89.45500183	31.04825034	129.65075
1	2215215	2216982	AT1G07210	0.2950089615	+	74	61.0	14.56249986	178.0732544
1	2216924	2219649	AT1G07220	1.062265494	-	12	103.71999740000001	29.22750092	156.1064976
1	2220180	2223018	AT1G07230	0.21265517960000002	-	76	77.84000015	14.33500028	190.0175056
1	2223624	2225524	AT1G07240	0.33335059359999997	+	24	58.09000015	12.56974998	196.27474819999998
1	2225758	2227608	AT1G07250	1.336719136	+	77	64.87000275	15.92599993	131.9529999
1	2238016	2241471	AT1G07280	0.1318422005	+	115	88.31999969	28.87700071	160.62350080000002
1	2247111	2248961	AT1G07310	0.009232949072999999	-	102	59.92000008	14.67450008	156.48374669999998
1	2248966	2250529	AT1G07320	2.492455398	+	690	64.86999893	13.15499983	167.7897484
1	2257383	2260187	AT1G07350	1.4916776669999998	-	65	112.1600037	27.88600006	247.93599550000002
1	2260316	2262923	AT1G07360	0.7365232674	-	74	77.56499863	22.49474969	209.9967503
1	2263036	2264553	AT1G07370	0.7579565925	+	22	66.03500175	19.83425088	163.30450290000002
1	2264633	2269121	AT1G07380	0.5613646864	-	12	64.87999916	10.07100015	175.3199951
1	2274925	2275783	AT1G07400	1.933584184	+	34	41.55000114	11.61474977	164.8772491
1	2277554	2280502	AT1G07420	0.5203908863000001	+	66	84.70000076	22.76749945	229.56375690000002
1	2286184	2287791	AT1G07440	1.076068396	-	31	96.27999878	12.39249969	214.0724983
1	2291368	2294558	AT1G07470	0.3822574672	+	41	111.8000031	26.79000092	189.0
1	2296022	2299544	AT1G07480	1.0040394259999998	-	32	133.4150009	33.28749995	261.2787468
1	2304434	2312399	AT1G07510	0.3808950439	+	35	62.31000137	18.99150071	194.173999
1	2309533	2312385	AT1G07520	0.09815795011	-	13	90.61000061	11.82099991	128.5629951
1	2313580	2316507	AT1G07530	1.1827242040000001	-	49	75.51999664	18.79600067	172.2799957
1	2331135	2333767	AT1G07570	0.1901997298	-	32	100.1200027	38.792998700000005	209.107502
1	2336476	2339391	AT1G07590	0.6365786292	-	15	64.19999695	16.09450021	123.72650149999998
1	2341446	2342148	AT1G07610	0.1515241942	+	194	50.57999992	12.47274997	138.5690052
1	2342197	2344314	AT1G07615	0.021322065409999997	-	22	84.72500229	32.45124907	171.7617477
1	2348914	2351799	AT1G07630	0.8644088186	+	14	90.18500137	34.38650022	181.376004
1	2353030	2356413	AT1G07640	0.5457401654	-	53	80.08000183	21.68200073	170.2820038
1	2359110	2366736	AT1G07650	0.1533403983	-	24	102.4749985	41.16074972	223.08850519999996
1	2368832	2369735	AT1G07660	0.09695891385	+	128	64.95999908	15.70274961	197.1105045
1	2370019	2374607	AT1G07670	0.5791673647	-	47	89.45999908	22.62499981	230.1539986
1	2379594	2381390	AT1G07700	0.4184022371	+	113	93.23999786	20.05999947	242.28200069999997
1	2381554	2386157	AT1G07705	0.08782048842	+	24	100.21999740000001	10.427999900000001	264.81900559999997
1	2390530	2392628	AT1G07720	0.5138772462	-	46	53.70999908	14.70750034	139.9762478
1	2394984	2397399	AT1G07728	0.1510430532	+	14	90.41500092	24.18700051	202.8075031
1	2403991	2406049	AT1G07750	0.04347688276000001	-	45	76.87999725	18.33199997	127.7320015
1	2407410	2409791	AT1G07770	5.081325697	-	1117	65.02999878	15.03599997	200.1459946
1	2409864	2412777	AT1G07780	0.2403412403	-	71	89.30000305	14.58249974	329.2725067
1	2412937	2413790	AT1G07790	2.236375549	+	95	59.86000061	13.452500199999998	146.6989937
1	2416177	2420829	AT1G07810	0.1969445014	+	56	91.69499969	20.15125036	179.2112541
1	2421088	2422066	AT1G07820	1.664406041	-	278	70.71500015	13.355499700000001	175.3052521
1	2422125	2423803	AT1G07830	0.02532530692	+	55	87.55999756	20.67050028	207.85899730000003
1	2424044	2426728	AT1G07840	0.3866363537	+	36	77.54499817	21.11625075	223.702507
1	2437280	2439665	AT1G07890	0.33417049260000004	+	847	72.54000092	15.01799998	195.85050049999998
1	2445436	2454645	AT1G07910	0.16046526949999998	+	15	140.38000490000002	48.74450073	248.8254929
1	2454770	2457321	AT1G07920	1.0518041409999999	+	2812	68.30500031	16.91299939	173.1192562
1	2458183	2460817	AT1G07930	3.275258548	+	1612	70.59500122	16.65099964	173.4672531
1	2462948	2465545	AT1G07940	1.350686118	-	2695	68.48000336	16.63349924	171.9634995
1	2465728	2467165	AT1G07950	0.2507534145	-	42	62.55500031	9.996000409	120.9620001
1	2467144	2469316	AT1G07960	0.24963785440000003	+	82	62.46500015	16.19500031	159.4624935
1	2469217	2472806	AT1G07970	9.782913388e-05	-	24	100.6049995	18.51699955	229.0172432
1	2473164	2475128	AT1G07980	0.056045514139999995	-	27	82.52999878	13.32150006	145.597995
1	2475225	2476167	AT1G07985	0.052070267860000005	+	21	48.88000107	10.46499991	124.1800003
1	2476952	2483196	AT1G07990	0.195936327	+	41	118.9300003	23.75	255.3600006
1	2483239	2485726	AT1G08000	1.018575941	-	23	83.70999908	29.21599941	132.6120022
1	2485847	2488085	AT1G08010	0.1300726649	-	51	69.75	21.6074996	168.8500061
1	2489408	2493327	AT1G08030	0.6978153814	-	27	136.11999509999998	32.89150085	288.8879974
1	2495308	2498764	AT1G08040	0.9218090533	-	52	101.86000059999999	9.284500086	220.99624669999997
1	2535250	2537932	AT1G08110	0.12536139699999999	+	313	52.75999832	14.32000008	219.673996
1	2539613	2542362	AT1G08125	0.1644760113	-	25	88.0	16.61800041	207.75199890000002
1	2542662	2547946	AT1G08130	0.8409205061	-	47	125.1900024	32.553499699999996	346.70149460000005
1	2559412	2560432	AT1G08160	0.183585245	-	15	52.24000168	13.32950029	106.7164989
1	2564360	2565318	AT1G08180	0.014135480569999997	-	26	63.90999794	14.56374931	150.51499750000002
1	2567419	2573448	AT1G08190	0.1349897835	+	71	85.58999634	25.86749935	238.9950027
1	2573817	2576844	AT1G08200	0.877970305	-	448	59.91500092	14.36374969	212.7857529
1	2576983	2580754	AT1G08210	0.04812497975	-	30	59.81999969	18.16349931	197.63225590000002
1	2581021	2583390	AT1G08220	0.3955871671	-	17	86.95999908	17.44199982	155.9999969
1	2583593	2586969	AT1G08230	1.126100505	-	19	148.75	12.59850025	210.2849998
1	2588775	2590609	AT1G08250	0.15154362359999998	-	45	60.22000122	11.6249999	136.0920059
1	2607876	2609971	AT1G08280	0.5268116949	+	16	64.77999878	26.79750109	154.3362551
1	2620334	2621545	AT1G08315	0.6218957428	-	21	82.25	32.49000072	207.31499480000002
1	2632809	2635866	AT1G08350	0.3712087462	-	13	107.54000090000001	18.89499969	157.8280014
1	2635938	2638004	AT1G08360	0.0796344421	+	913	62.13000107	12.97199993	175.97199709999998
1	2638036	2640663	AT1G08370	0.23565289920000002	+	53	88.75	22.36100025	179.92699580000001
1	2640802	2641934	AT1G08380	3.633926625	-	12161	66.12999725	12.52999973	171.16000369999998
1	2642071	2643285	AT1G08390	0.9356828303	+	18	66.16500092	22.14374971	194.6340023
1	2646143	2649440	AT1G08410	1.691144536	+	25	100.91999820000001	57.50000153	282.371994
1	2649458	2657120	AT1G08420	0.08580636285	+	41	110.6200027	21.95999908	227.88000490000002
1	2667797	2671957	AT1G08450	0.4611796756	-	92	62.14999962	18.88400011	219.70499840000002
1	2672197	2674721	AT1G08460	0.0489940333	+	37	65.12999725	19.95600004	194.3669998
1	2675812	2679824	AT1G08465	0.9108734586	+	58	54.65499878	14.52625008	155.07300569999998
1	2682057	2684171	AT1G08470	0.21195109760000003	-	29	44.47999954	9.551000023	154.8839996
1	2684175	2685702	AT1G08480	0.7856033384000001	+	172	71.72999954	14.36550002	168.42174530000003
1	2685658	2688658	AT1G08490	1.699010625	-	87	108.0	19.7675004	197.36150049999998
1	2688879	2690250	AT1G08500	1.055161979	+	15	80.80000305	30.72650032	156.1009979
1	2691061	2694547	AT1G08510	0.166933791	-	175	93.47000122	28.92650023	225.06900330000002
1	2696380	2701022	AT1G08520	0.3123624315	+	225	102.75	16.21200027	244.6700012
1	2700980	2703162	AT1G08530	0.7251633226	+	22	70.94499969	9.908500218	288.8422512
1	2703294	2706860	AT1G08540	0.3892724092	+	126	83.14500046	19.19499993	210.744997
1	2706867	2709988	AT1G08550	0.9000336879	+	80	106.4449997	16.00100088	197.5072464
1	2709524	2711000	AT1G08560	0.13921412560000002	-	24	55.55999947	14.96200044	118.73300090000001
1	2712693	2714833	AT1G08570	1.794592219	+	230	79.00999832	17.07600036	205.2894981
1	2714993	2716532	AT1G08580	0.5790225318	-	104	71.02000046	11.12399979	170.86950339999999
1	2723676	2733613	AT1G08600	0.026872891030000002	+	21	117.4400024	32.63499928	214.7649994
1	2733595	2735819	AT1G08610	0.164499364	-	33	77.20999908	29.28799934	168.83200380000002
1	2736655	2743881	AT1G08620	0.002373723846	+	18	82.42499924	21.55300038	162.6219997
1	2743760	2747967	AT1G08630	0.08108650294	-	12	95.61999893	37.80275068	181.5577469
1	2748360	2751620	AT1G08640	4.821177721999999e-05	-	172	98.81000137	13.39300013	259.00874669999996
1	2752123	2753809	AT1G08650	0.1382492911	+	22	80.27500153	29.92975001	223.44675330000004
1	2756903	2759889	AT1G08660	0.02362956517	-	48	136.2900009	27.24799957	363.94123989999997
1	2762583	2768967	AT1G08680	0.8480313741	+	32	118.81000139999999	24.96074944	235.0045006
1	2769614	2771477	AT1G08700	1.2784906520000001	-	51	68.80000305	20.40750074	153.35749819999998
1	2771619	2773531	AT1G08710	1.306635379	+	14	130.5449982	44.20325012	220.9635025
1	2773940	2779308	AT1G08720	0.1366992676	+	11	118.1900024	23.46250057	235.779995
1	2801041	2804711	AT1G08750	0.713335279	+	23	77.08000183	21.55199947	221.3474983
1	2805043	2808623	AT1G08760	0.03930899785	+	14	85.30999756	23.65050037	162.82199730000002
1	2808759	2809775	AT1G08770	0.2448659562	+	63	56.04000092	18.15949984	181.3015015
1	2809777	2811313	AT1G08780	0.22277713579999997	-	74	74.54499817	14.66724973	155.3360054
1	2812817	2818071	AT1G08800	0.004958727757	-	18	102.3250008	24.38924947	339.24174419999997
1	2819064	2820478	AT1G08810	0.5270140006	-	19	90.02999878	14.2165	163.490506
1	2821353	2825481	AT1G08820	0.8269565087	-	71	79.5	18.36750031	176.91749950000002
1	2827059	2829315	AT1G08830	1.79309057	+	213	103.0699997	27.71800022	212.5419983
1	2838788	2841134	AT1G08845	0.2496341062	+	22	68.10000038	24.89225006	121.8509975
1	2846893	2848100	AT1G08880	0.4680729183	-	243	66.25	13.01199999	207.5375015
1	2848148	2852270	AT1G08890	1.9466842469999999	+	32	94.85499954	30.80900054	239.8490005
1	2852362	2855941	AT1G08900	0.2552388195	+	45	121.3600006	28.36700001	299.76500239999996
1	2856161	2861170	AT1G08910	5.626645024e-06	+	22	130.0650024	32.06699872	233.8522503
1	2867202	2870745	AT1G08920	0.1966796854	+	35	99.58000183	30.47549982	189.08450009999999
1	2873299	2877270	AT1G08930	2.192739986	+	108	86.53499985	15.95375006	264.4027435
1	2879505	2882234	AT1G08960	0.5350870289	+	19	88.08000183	9.431000042	140.4214996
1	2882490	2884342	AT1G08970	1.4213444080000002	+	105	74.08000183	14.33200016	166.6319977
1	2884350	2886621	AT1G08980	0.31326455870000003	+	66	97.11999893	16.84000015	231.5874958
1	2895165	2899446	AT1G09010	0.05214556656	-	59	106.70999909999999	22.03750019	201.3485001
1	2899775	2904862	AT1G09020	0.5531974862	-	55	125.6900024	45.47000103	275.8459984
1	2921063	2925826	AT1G09060	0.01161977524	-	29	99.06999969	16.71500044	232.58400269999998
1	2927501	2929107	AT1G09070	0.4318975122	+	334	67.47000122	15.00500023	159.2724957
1	2936527	2939363	AT1G09100	0.6918870306	-	35	110.83000179999999	14.23950005	293.2394958
1	2939567	2942345	AT1G09130	1.4776985459999998	-	357	85.30999756	17.2279995	216.5230026
1	2942537	2945976	AT1G09140	0.44267345950000003	-	108	147.72000119999998	18.03099918	333.98024219999996
1	2946029	2949159	AT1G09150	0.8786652502	+	112	85.75	15.89074993	192.3532536
1	2952596	2955745	AT1G09160	0.490094065	-	55	121.6100006	16.52999983	245.5074951
1	2965022	2965972	AT1G09180	0.5123967116	+	17	60.91999817	15.17400017	188.31000669999997
1	2971570	2972334	AT1G09200	0.397151346	-	206	51.390001299999994	13.09624994	159.33249469999998
1	2972637	2977002	AT1G09210	0.2911285327	-	199	77.68000031	16.66299934	188.4904984
1	2979510	2982713	AT1G09230	0.7727590038	-	21	170.78999330000002	50.82500076	248.2200012
1	2984828	2986231	AT1G09240	0.4715609168	+	17	62.54000092	23.673999600000002	198.18799740000003
1	2989140	2990427	AT1G09250	0.40382072210000003	+	114	67.93000031	12.33124988	132.9780033
1	2994330	2998222	AT1G09270	0.8701203937	+	118	84.86999893	21.81925039	216.5342545
1	2998099	3001362	AT1G09280	0.3293627761	-	23	94.19000244	17.87600012	213.518502
1	3001438	3003762	AT1G09290	1.14819757	-	28	72.56000137	15.56099949	191.55075190000002
1	3008909	3009898	AT1G09310	1.8420354030000001	+	3555	40.93000031	11.37850008	131.8725052
1	3012738	3015255	AT1G09330	0.22418458309999997	-	82	66.97999954	14.44100029	208.4782501
1	3015236	3018542	AT1G09340	3.14244845	+	1344	71.77999878	17.16650052	192.3210011
1	3031045	3033582	AT1G09390	0.035784120430000003	+	40	64.09999847	20.67975073	303.8572571
1	3037753	3038408	AT1G09415	0.6161682087	-	32	62.74499893	12.26149994	102.1477495
1	3041995	3045541	AT1G09430	0.5412766441	+	130	67.58499908	16.55000043	213.1355011
1	3045258	3048006	AT1G09440	0.02887993357	-	15	65.69000244	10.70000007	165.54650039999999
1	3053697	3055360	AT1G09460	0.5045483111	+	15	134.6999969	29.35549984	320.3020096
1	3063935	3065949	AT1G09490	0.1205283848	+	75	78.19000244	24.688000199999998	287.3830124
1	3066673	3068796	AT1G09500	0.8799746951999999	+	45	94.29000092	16.46000042	211.9539932
1	3070914	3072074	AT1G09520	0.9776253413	-	62	69.09500122	13.35174978	172.9137524
1	3075767	3079654	AT1G09530	0.9102498342	+	48	113.33499909999999	31.85199957	312.46675489999996
1	3093643	3094954	AT1G09560	0.037812389019999997	+	76	56.78499985	15.68249989	190.19125559999998
1	3095159	3100819	AT1G09570	1.4847576080000002	-	327	92.38999939	20.65649948	208.06449740000002
1	3104491	3106366	AT1G09580	0.7579565925	+	22	89.70500183	14.91575024	179.31124530000002
1	3106366	3107801	AT1G09590	1.061850999	+	583	66.54000092	11.77250013	179.76950300000001
1	3112777	3116699	AT1G09620	0.3123245167	-	157	77.65000153	23.26500092	228.91899410000002
1	3118154	3119815	AT1G09630	0.6742576648	-	54	69.11999893	18.43374987	177.8077484
1	3119738	3122542	AT1G09640	1.2530186559999998	+	525	69.62000275	13.33699989	185.4449966
1	3122925	3124667	AT1G09645	0.8247304628000001	+	77	63.77999878	16.43600016	166.29799350000002
1	3127761	3131094	AT1G09660	0.480796806	-	50	97.47499847	15.66949985	243.9270069
1	3136187	3137684	AT1G09690	0.5002560418	-	1275	50.83000183	10.684999900000001	162.66499480000002
1	3147636	3154404	AT1G09730	0.7310798022	-	25	67.5	15.94400024	362.2160034
1	3154389	3156376	AT1G09740	0.4089966674	+	30	48.40999985	19.76275036	143.4712498
1	3157500	3159148	AT1G09750	2.556582633	+	143	74.45999908	18.62199936	215.31799700000002
1	3159124	3161692	AT1G09760	0.6626608865	-	89	83.0	19.98600044	201.4720001
1	3161831	3165616	AT1G09770	0.3710955601	+	157	71.73000336	14.24800034	188.1839935
1	3165369	3167924	AT1G09780	0.4829665954	-	125	81.12999725	15.96499977	172.1860001
1	3173533	3176910	AT1G09795	0.5538257283	+	92	95.02999878	22.63775067	203.83550449999998
1	3180925	3184224	AT1G09810	0.6222368404	-	23	116.79000090000001	19.13400006	202.7170021
1	3189300	3190242	AT1G09815	1.023026475	+	81	49.59000015	13.46000004	145.08000180000002
1	3192567	3195044	AT1G09830	2.13276883	-	47	85.5	17.348999499999998	154.9705017
1	3195718	3200403	AT1G09840	0.4199722839	-	42	103.2000008	29.73774934	254.622998
1	3201684	3204150	AT1G09850	0.3402408293	+	31	84.68000031	25.82999992	222.6850014
1	3205578	3208714	AT1G09870	0.384508189	+	45	96.02999878	18.99200058	218.7740005
1	3218132	3219929	AT1G09900	0.0006464990847	+	43	74.80999756	24.16450005	166.7649971
1	3224683	3227083	AT1G09920	0.8213081590000001	-	65	76.30000305	15.72599983	176.9240021
1	3236907	3239554	AT1G09940	0.8010303408	-	25	82.69999695	34.27600021	160.9259949
1	3252097	3255782	AT1G09970	0.3359706951	+	88	78.25	20.86049953	186.50950509999998
1	3256188	3261741	AT1G09980	0.7872781185	-	28	113.1800003	47.36999989	184.54199680000002
1	3262221	3263642	AT1G09995	0.1972274663	-	20	102.83000179999999	20.87125041	268.9932491
1	3269538	3272110	AT1G10020	1.364878887	-	38	82.73500061	36.60750124	202.459248
1	3273752	3275953	AT1G10030	0.1582607682	+	33	65.45999908	16.47599964	208.32000119999998
1	3284072	3287292	AT1G10060	0.48011192659999996	+	59	124.1399994	22.76200037	241.9730003
1	3288086	3290471	AT1G10070	0.12845111539999998	+	48	109.77500149999999	14.47149963	312.7984962
1	3290310	3296198	AT1G10090	0.19497419219999998	-	24	97.49500275	52.5977499	238.0492516
1	3304038	3306956	AT1G10120	0.39629764829999997	-	15	147.16999819999998	23.37399931	243.5055069
1	3310929	3322269	AT1G10130	0.1441558875	+	27	149.8500061	46.07299919	216.2350014
1	3322553	3323735	AT1G10140	0.07605968217	-	78	83.38500214	9.828000021	191.67774430000003
1	3325798	3327614	AT1G10150	0.1654522853	+	86	78.7349968	20.77374935	223.3037434
1	3333503	3338188	AT1G10170	0.21901730079999998	-	46	78.10499954	31.82250023	174.5762444
1	3338184	3341628	AT1G10180	0.5064253699	-	25	83.37999725	31.14399891	180.08000180000002
1	3346382	3348139	AT1G10200	0.12005297470000001	-	146	88.74000168	23.9424994	238.28249739999998
1	3349081	3351180	AT1G10210	0.00395773738	+	15	90.69000244	16.71049986	216.0799995
1	3355674	3356151	AT1G10230	1.2648735	+	36	67.625	10.72250009	161.15124509999998
1	3356626	3359853	AT1G10240	0.05038914456	-	16	105.7150002	17.60000002	178.29624750000002
1	3363431	3366493	AT1G10270	0.1777827413	+	15	60.81999969	25.53750038	127.27750400000001
1	3370401	3377463	AT1G10290	0.5214667261	+	85	108.70999909999999	21.03699989	334.7629883
1	3381446	3384003	AT1G10310	1.393328092	-	62	82.66500092	16.79499986	210.44849739999998
1	3392942	3395181	AT1G10350	0.2678091714	-	24	69.59500122	16.07650056	217.43049739999998
1	3395550	3396953	AT1G10360	0.2642496908	-	108	95.31500244	15.71299965	239.9055019
1	3396882	3398358	AT1G10370	0.2227898474	-	261	62.91999817	12.65500021	159.6499939
1	3400553	3402420	AT1G10380	0.4044232311	+	17	95.31999969	20.48799973	166.7460022
1	3406955	3412874	AT1G10390	0.038114968730000004	-	80	102.6349983	28.94774971	219.32824399999998
1	3416429	3419691	AT1G10410	0.5909016643	-	34	104.18499759999999	35.04549885	223.9402534
1	3428477	3430924	AT1G10430	0.2266925911	-	43	79.95999908	14.50600033	251.2299957
1	3431763	3438370	AT1G10450	0.32657322489999996	+	26	110.8400002	48.24499989	224.82875440000004
1	3441987	3444360	AT1G10470	1.113045813	-	86	72.56000137	12.93875027	216.94375609999997
1	3453190	3460620	AT1G10490	0.1616108395	+	26	112.2150002	34.66625082	200.61000249999998
1	3459999	3461485	AT1G10500	1.300809642	-	274	71.64500046	16.00600007	222.53725319999995
1	3461634	3465786	AT1G10510	0.340701634	+	64	103.2299995	31.30400066	244.6775009
1	3469511	3471488	AT1G10522	0.2113734018	+	75	63.0	13.40799999	169.3055008
1	3479065	3481041	AT1G10550	0.2645745142	-	17	79.26999664	22.78999977	141.91999819999998
1	3487385	3491277	AT1G10570	0.3478643878	+	21	163.61999509999998	31.40000057	269.9899979
1	3491257	3493834	AT1G10580	0.2783338101	-	38	84.88000107	17.10799997	201.73299369999998
1	3493769	3495244	AT1G10585	0.06865797477999999	-	11	49.95999908	18.0625	134.6400013
1	3501987	3503544	AT1G10590	0.6153210884	-	303	57.52000046	12.99649992	173.8535042
1	3503639	3506159	AT1G10600	0.02673184531	+	47	84.04000092	25.62050047	191.1129974
1	3506185	3509006	AT1G10610	0.1043746283	+	11	147.38000490000002	96.69999886	262.14000699999997
1	3512738	3514824	AT1G10630	0.7440537769	-	198	71.5	16.09525077	211.7847446
1	3515181	3518035	AT1G10640	0.0027693128149999997	-	27	72.5	16.80299954	135.293
1	3523985	3526531	AT1G10650	0.1416130779	-	26	74.94999695	18.09000051	164.8900051
1	3532228	3535137	AT1G10660	0.3568010132	+	55	85.0	14.03200021	265.5840027
1	3535287	3538439	AT1G10670	0.9724595359	+	312	70.45499802	12.63100035	219.31575130000002
1	3544912	3545614	AT1G10682	0.41822766200000006	-	279	43.38000107	12.67700028	133.9685013
1	3549919	3550848	AT1G10690	0.023867120630000002	-	11	78.06999969	19.0600009	154.510006
1	3554103	3556544	AT1G10700	0.6398264633	+	34	119.4249992	34.73875105	184.275
1	3562840	3564850	AT1G10720	0.1956861252	+	34	86.85499954	23.4779995	187.3714962
1	3565256	3568106	AT1G10730	0.3241774159	+	13	100.0	48.17400055	235.9680069
1	3567904	3571053	AT1G10740	1.623851155	-	57	106.45999909999999	22.88199997	264.3239929
1	3580829	3590928	AT1G10760	0.5217571275	-	84	133.4100037	23.08625035	345.8229897
1	3600909	3605076	AT1G10820	0.1591031172	-	30	112.079998	24.17825046	226.10349810000002
1	3605511	3607580	AT1G10830	0.01247413448	-	79	85.76000214	21.35799913	197.7449997
1	3607630	3610616	AT1G10840	0.680151724	-	213	87.01999664	19.93499908	235.9300003
1	3611489	3614613	AT1G10850	0.9155037782	+	36	91.07500076	21.06124926	181.57125469999997
1	3614512	3616308	AT1G10865	0.2529820292	-	94	46.73999977	13.63324995	156.6589947
1	3616609	3623806	AT1G10870	0.01982216432	-	17	88.83999634	27.83199959	288.5460083
1	3627645	3630808	AT1G10890	0.04749938393	+	33	171.21000669999998	34.78199997	307.88799439999997
1	3632131	3637250	AT1G10900	0.103439479	-	49	82.88999939	10.27200012	216.6919952
1	3639834	3644187	AT1G10910	0.2189136643	+	53	124.1999969	18.63400002	237.4539963
1	3647875	3655685	AT1G10930	0.3632023537	-	12	130.0749969	23.575	274.24374389999997
1	3655672	3658612	AT1G10940	0.7511342213	-	110	105.4249992	31.79774976	260.3727493
1	3659203	3664264	AT1G10950	0.025777608959999997	+	199	91.0	34.25399971	220.13599399999998
1	3664186	3665040	AT1G10960	0.6868767521	+	848	54.609998700000006	12.86499989	129.2937557
1	3671755	3676133	AT1G11000	0.00022935882649999999	-	14	120.9650002	50.65324917	178.6377525
1	3676690	3678567	AT1G11020	0.3899889877	+	31	77.76999664	15.31249976	199.85249330000002
1	3681887	3684169	AT1G11050	1.91354422	+	24	60.96999931	15.80049994	137.06599730000002
1	3702607	3703779	AT1G11090	0.379555717	+	21	60.58000183	10.58500004	140.5
1	3715083	3717659	AT1G11120	0.42669997049999997	+	11	91.51999664	25.26249886	217.345005
1	3722707	3727450	AT1G11130	0.9000457433	+	15	90.69999695	22.07249908	170.8890049
1	3744857	3745655	AT1G11175	0.3833213533	+	25	76.73000336	35.15800018	146.51999819999997
1	3745773	3748557	AT1G11180	0.09481363693	+	20	64.09999847	15.33124979	216.9727497
1	3753212	3755658	AT1G11200	1.3222946420000001	+	28	83.81999969	17.33399968	229.3182465
1	3755667	3756998	AT1G11210	0.2059574562	-	54	71.45999908	14.29474998	153.73550490000002
1	3766753	3769799	AT1G11240	1.124035136	-	59	94.48000336	12.5474998	205.9809982
1	3777235	3780823	AT1G11260	8.602051341000001	+	552	84.93999863	16.14374933	203.7314968
1	3787317	3790935	AT1G11280	0.5840230068	-	40	131.3149986	36.43400135	311.50849910000005
1	3800499	3804233	AT1G11310	1.0889403290000002	-	81	112.3099976	18.45999908	236.2200012
1	3809794	3813809	AT1G11330	0.07933469375	+	18	89.49499893	18.92425017	154.24974780000002
1	3817423	3820887	AT1G11350	0.2143329745	-	28	101.3950005	29.80499973	201.7129951
1	3821105	3823088	AT1G11360	0.08455542921	-	67	62.06000137	13.64900041	146.606498
1	3832562	3834462	AT1G11380	0.6277836533	+	13	95.12999725	36.50200005	169.5759979
1	3834431	3837676	AT1G11390	0.9608513545999999	-	24	110.0699997	26.98300071	183.0512512
1	3837693	3841218	AT1G11400	5.530558342e-05	+	53	69.04000092	18.89400063	184.0809967
1	3840876	3844479	AT1G11410	0.09424371108999999	+	36	105.54499820000001	18.46000004	273.1687508
1	3847219	3849224	AT1G11430	0.4651586053	+	380	74.01499939	17.42275043	175.878495
1	3849200	3850735	AT1G11440	0.3935310493	+	38	63.68000031	14.02499983	165.51600109999998
1	3862398	3864074	AT1G11475	0.07595879812999999	+	220	64.93999863	14.07274978	156.5835007
1	3864042	3867000	AT1G11480	0.06910147378999999	-	63	68.34999847	20.42400026	159.97999950000002
1	3874395	3875484	AT1G11530	0.23581682690000003	+	120	73.43999863	14.40774982	195.5464958
1	3878494	3880391	AT1G11545	0.5373324911	-	29	70.59999847	20.39300003	186.9110016
1	3888609	3890824	AT1G11580	0.1560616276	+	37	66.25	13.04300003	176.4759995
1	3895178	3896934	AT1G11592	1.077535192	-	24	72.38000107	23.37325053	187.51375080000003
1	3901949	3903895	AT1G11600	0.37484822770000004	+	28	68.71500015	10.10400017	309.9467514
1	3912753	3914465	AT1G11630	0.07626003972	-	18	66.18000221	24.70424991	182.0262573
1	3914773	3918243	AT1G11650	0.40902086020000006	+	422	69.44499969	14.70249982	189.175243
1	3920477	3924566	AT1G11660	0.1087200377	+	30	73.07500076	9.350249839	227.17149700000002
1	3928114	3931701	AT1G11670	1.8038458590000002	-	24	61.01000023	28.03650074	150.7462482
1	3938421	3940871	AT1G11680	0.5223294579	+	188	73.58000183	19.08050041	179.1375
1	3945583	3946757	AT1G11700	0.2300207466	+	48	58.25	11.76449983	138.8260033
1	3951365	3957044	AT1G11720	0.9726326612	+	43	142.27999880000002	21.87050076	318.3149994
1	3967475	3969877	AT1G11750	1.403361516	+	236	89.68000031	17.80749965	219.277504
1	3969680	3971911	AT1G11755	0.9223913635	-	31	92.34999847	17.08999968	190.0500031
1	3971985	3973294	AT1G11760	0.04139702869	-	20	75.17499924	17.46749985	186.810751
1	3976838	3979237	AT1G11780	0.7574842233	-	22	104.8199997	17.66475027	222.2737602
1	3981152	3985219	AT1G11790	0.114847	+	27	88.58999634	15.02049985	236.7919991
1	3985183	3987290	AT1G11800	0.5564659893	-	15	89.33000183	23.01200037	136.8360004
1	3991026	3993707	AT1G11820	1.033975399	-	96	94.81000137	21.50000024	250.11000249999998
1	3995157	3997965	AT1G11840	0.04723526038	+	395	66.58000183	16.18500071	189.72899630000003
1	3999156	4000024	AT1G11850	0.19670443489999997	+	94	43.91500092	11.10225005	111.7902515
1	4001112	4003748	AT1G11860	3.91862894	+	1133	69.04000092	14.23499975	191.2879944
1	4003756	4007015	AT1G11870	0.8257519175	+	46	90.09500122	26.25999951	194.69750019999998
1	4010756	4013104	AT1G11890	0.8240966826	+	68	76.77000046	12.32250001	150.39275049999998
1	4014781	4016544	AT1G11905	0.02185899963	+	24	61.99000168	13.90749996	162.4100014
1	4016711	4021043	AT1G11910	0.49643942909999994	-	799	71.76000214	13.1059999	233.68650209999998
1	4028594	4030656	AT1G11930	0.08658548612	+	88	85.19499969	18.52749968	286.43501360000005
1	4039565	4044046	AT1G11960	0.2648602289	-	14	116.11999890000001	47.74074945	214.6147514
1	4049895	4053871	AT1G12000	0.3096438939	-	103	80.75	11.23900003	191.34650190000002
1	4061362	4063549	AT1G12020	0.2692161585	-	16	58.42499924	16.46500027	140.9350014
1	4072740	4076207	AT1G12050	0.2538038336	+	70	80.16500092	16.22699945	245.7029972
1	4084161	4085185	AT1G12080	0.8259194611	+	100	52.70499992	15.76875007	126.7492462
1	4089663	4090857	AT1G12090	0.3315250995	-	3848	51.66499901	11.33699992	145.42749519999998
1	4105222	4109601	AT1G12110	0.8177870771	+	80	63.68000031	14.44824955	147.5507561
1	4114673	4117614	AT1G12120	1.767184541	-	75	88.69000244	30.82249994	183.2564957
1	4121284	4124595	AT1G12140	0.3538166767	+	41	82.31999969	14.57999992	233.2700043
1	4137510	4140158	AT1G12200	0.3602512469	+	23	103.5899963	18.26750007	246.6800011
1	4147961	4151056	AT1G12230	0.8922879529000001	+	183	85.23000336	19.58750076	240.33649599999998
1	4153640	4157653	AT1G12240	1.7751773290000001	+	217	104.04000090000001	14.42600021	243.102005
1	4157653	4159046	AT1G12244	0.03986623044	+	16	92.38000107	14.74874985	174.3274994
1	4159226	4161506	AT1G12250	0.4952252596	+	114	87.6099968	17.99899983	219.30450359999998
1	4172034	4174730	AT1G12270	0.025475562719999997	+	71	79.06999969	12.79500031	166.2699966
1	4186652	4188233	AT1G12310	0.1376612576	-	185	49.59999847	12.86400013	160.4939972
1	4194419	4196749	AT1G12330	0.36187619130000004	+	35	84.69000244	17.69600072	187.7085022
1	4198336	4200849	AT1G12350	0.1208048642	+	26	91.92499924	16.18250012	187.3599987
1	4200863	4206486	AT1G12360	1.894974519	+	45	148.27999880000002	17.72399998	273.60599060000004
1	4220043	4221803	AT1G12390	0.2357395104	+	31	97.79000092	10.62500024	176.5399971
1	4221778	4222875	AT1G12400	0.010163001429999999	+	22	91.29999924	21.63275003	215.0817539
1	4223029	4225254	AT1G12410	0.7493749174	+	277	80.76999664	15.74699993	226.79399869999997
1	4233716	4238795	AT1G12430	0.46681287450000003	-	13	84.23000336	31.44300041	162.9390015
1	4241420	4243229	AT1G12440	1.5144562419999998	-	300	61.45000076	14.91800008	181.3302517
1	4247217	4250758	AT1G12460	0.2099151739	+	18	73.82999802	26.94400058	180.80725
1	4250944	4257392	AT1G12470	0.8585542542	+	37	110.8799973	19.10799971	231.2359955
1	4263149	4265156	AT1G12500	0.4517690003	-	64	71.76999664	7.870750022	232.67575069999998
1	4267073	4268982	AT1G12520	0.1232050354	-	57	106.59999850000001	15.19799957	216.26399840000002
1	4268985	4270907	AT1G12530	0.1053624315	-	37	75.87999725	20.26399994	166.18099980000002
1	4282793	4285876	AT1G12580	0.3478519066	+	42	74.68000031	18.96199913	266.85200000000003
1	4303279	4305907	AT1G12640	0.6173237272	-	38	77.31000137	30.48325057	156.30300219999998
1	4305790	4308007	AT1G12650	0.5131117346999999	+	59	70.09999847	16.49699945	202.3595024
1	4319876	4323265	AT1G12680	1.7520702540000002	-	28	99.93000031	32.44450102	258.15999569999997
1	4344942	4348390	AT1G12750	0.7579565925	-	22	183.3649979	65.62349854	392.5767502
1	4348497	4350993	AT1G12760	0.2180552811	+	103	83.95999908	16.02600055	186.017997
1	4351018	4353797	AT1G12770	0.3009252348	+	66	67.74499893	15.390000099999998	173.32000349999998
1	4355925	4358894	AT1G12780	2.499094479	-	153	109.59999850000001	17.31600037	202.8960022
1	4361550	4365414	AT1G12800	0.05173600257	-	192	99.83000183	21.94775052	235.93224790000002
1	4367255	4368822	AT1G12810	0.4959097583	+	75	60.75	15.28800006	166.5129967
1	4368759	4371298	AT1G12820	1.415144264	-	78	104.8600006	15.66174996	200.19375459999998
1	4374204	4378514	AT1G12840	0.2741364199	+	250	69.88000107	13.10575008	240.4537453
1	4374248	4375247	AT1G12830	1.046448537	-	43	71.29000092	10.9425004	143.0330017
1	4378831	4379607	AT1G12845	0.7281673987999999	-	55	56.38999939	15.01500015	144.029998
1	4379693	4381764	AT1G12850	0.6867179244	-	87	70.91999817	14.70749984	159.4129944
1	4384303	4386651	AT1G12860	0.858604833	+	73	94.04000092	18.92999992	222.03800049999998
1	4392437	4394454	AT1G12900	0.5331498411	-	2613	72.69000244	15.48200016	180.5509949
1	4394896	4396291	AT1G12910	0.08269327856	-	91	64.45999908	15.227500199999998	129.65499499999999
1	4396347	4398193	AT1G12920	0.6902349899	-	186	74.43500137	12.68374979	179.0125065
1	4423539	4425936	AT1G12970	0.19550397079999998	+	24	75.54000092	25.48574982	172.5954941
1	4433604	4436102	AT1G12990	0.8919027048	+	23	61.72000122	19.87449994	112.4885017
1	4436100	4439639	AT1G13000	0.2014294914	-	24	103.3450012	34.29950051	276.5757427
1	4440403	4443954	AT1G13020	0.31644594649999996	-	33	76.97000122	19.44200058	214.878006
1	4444042	4447412	AT1G13030	0.2215120959	-	19	82.88999939	14.94599996	214.1484955
1	4452189	4454900	AT1G13060	0.2897766577	+	200	71.08499908	10.64175007	194.9842476
1	4459001	4460996	AT1G13080	1.541204995	+	55	80.30999756	16.16449962	165.8740044
1	4461737	4463469	AT1G13090	0.2677486058	+	71	91.12000275	21.53250074	198.4150009
1	4463858	4465725	AT1G13100	0.09087060603	+	15	93.65000153	15.01450005	213.5205017
1	4467093	4469033	AT1G13110	0.5140174086	+	127	71.16000366	10.84699974	212.33200449999998
1	4469143	4473319	AT1G13120	0.5901591647	-	20	136.3000031	31.57875042	204.3290054
1	4480859	4481334	AT1G13145	0.8976854992000001	+	21	50.81000137	16.48499966	186.5149994
1	4484583	4488577	AT1G13160	0.04943351648	+	37	93.20999908	18.53100052	232.57299500000002
1	4488532	4492667	AT1G13170	1.587434131	-	30	118.79000090000001	28.88575058	335.03699
1	4494923	4498469	AT1G13180	0.025983087880000002	+	14	122.2749977	30.81050076	171.2444996
1	4498763	4501624	AT1G13190	0.1413975509	+	46	65.04499817	16.59875035	148.57375530000002
1	4501580	4503676	AT1G13195	0.1203960826	-	11	96.19999695	13.78749967	405.5999908
1	4515463	4520306	AT1G13220	2.551520539	+	14	163.0849991	106.4347527	287.555006
1	4525413	4526204	AT1G13245	1.4914092330000002	-	1256	70.60000229	14.29500008	168.9262543
1	4528484	4530222	AT1G13250	0.07130570723999999	-	59	70.06999969	16.45450001	138.73950580000002
1	4542167	4543970	AT1G13260	0.08910350468	+	249	75.48000336	18.23999977	187.84400630000002
1	4544888	4547373	AT1G13270	0.7390239626	+	66	90.84500122	26.51999998	213.4100037
1	4547387	4548894	AT1G13280	0.2534773587	+	83	69.19000244	13.661499599999999	191.38199840000001
1	4563427	4567849	AT1G13320	0.5058310663000001	-	95	73.56999969	11.29599972	230.396505
1	4572303	4576711	AT1G13350	0.2159639672	-	25	140.07000730000001	86.16599884	321.35000310000004
1	4576872	4578369	AT1G13360	0.05588918766	-	131	74.54000092	20.27499962	148.5750046
1	4588993	4590501	AT1G13380	0.1044480207	-	89	50.54000092	12.27800007	150.58599850000002
1	4592303	4594468	AT1G13390	0.1559531935	-	53	94.91999817	9.815999889	318.40199889999997
1	4608076	4610878	AT1G13440	2.592619318	-	2037	55.29999924	13.15699987	183.0900009
1	4612730	4615353	AT1G13450	0.3226935791	-	41	122.04000090000001	32.02999878	280.230011
1	4615766	4618449	AT1G13460	0.031474328860000005	+	34	79.40500259	19.60200005	152.449757
1	4638467	4642190	AT1G13560	0.2875974257	-	154	78.86000061	17.16424932	234.9427437
1	4642123	4644422	AT1G13570	0.0377229389	-	21	104.8499985	45.29500008	313.97500610000003
1	4644520	4647142	AT1G13580	0.5504970943	-	19	82.19000244	16.74599934	201.22550049999998
1	4677003	4679862	AT1G13640	1.007174013	-	41	72.09999847	18.27000046	247.89999390000003
1	4680289	4682382	AT1G13650	1.022689881	-	73	106.16999820000001	16.09600048	196.72200619999998
1	4688017	4689265	AT1G13670	0.45745622490000004	+	41	55.16999817	19.90999985	130.9199982
1	4693281	4694410	AT1G13690	0.9155256291	+	80	70.40000153	17.43800089	166.391243
1	4694371	4696023	AT1G13700	1.215518577	-	19	112.1299973	50.27899933	151.8054985
1	4709756	4712672	AT1G13730	0.8965049272	+	44	64.77499962	25.1972497	183.41649740000003
1	4713432	4715407	AT1G13740	0.9107797778	+	15	95.86000061	34.11000004	304.31199869999995
1	4721573	4724520	AT1G13770	1.909503178	+	19	137.96000669999998	39.75899954	255.1204971
1	4733990	4735453	AT1G13810	0.2496341062	+	22	76.38000107	32.2767488	161.25900080000002
1	4735473	4737910	AT1G13820	1.081222493	+	120	85.12999725	20.0432497	179.76749840000002
1	4743203	4746956	AT1G13860	0.22809675399999998	-	15	120.6900024	37.41449957	160.10149919999998
1	4747185	4748666	AT1G13870	0.2902271769	-	31	72.04000092	17.30999947	181.76250080000003
1	4748830	4751234	AT1G13880	0.10574498	+	31	80.09999847	17.55499971	159.6025009
1	4753098	4755656	AT1G13900	0.13194026039999998	-	36	71.20500183	16.4625001	239.78124619999997
1	4760956	4762666	AT1G13930	0.6879450474	+	2099	49.68000031	12.0934998	144.943502
1	4762478	4766852	AT1G13940	1.9683382390000002	-	32	109.9799995	26.0050005	205.0179955
1	4773433	4774935	AT1G13950	0.04088878725	+	33	117.40000149999999	17.91200066	279.7099976
1	4776282	4779420	AT1G13960	0.01134761777	+	41	91.41999817	17.55999947	166.88000490000002
1	4788462	4794654	AT1G13980	0.9029302281	+	56	85.84999847	20.19624972	269.701252
1	4794663	4796599	AT1G13990	0.540564223	+	55	86.73999786	26.58450012	187.7790009
1	4797357	4800283	AT1G14000	0.335974836	+	86	81.93500137	15.46749973	229.8712502
1	4800168	4801850	AT1G14010	1.3458676619999999	-	51	77.54000092	20.81999969	173.1025009
1	4802719	4805375	AT1G14020	0.4459993385	+	21	135.41000369999998	34.48499966	207.0100021
1	4805305	4807517	AT1G14030	0.2159054497	-	61	102.54000090000001	30.77499962	222.75500490000002
1	4816927	4818112	AT1G14060	1.441121005	-	31	75.04000092	15.82500005	150.2475014
1	4833395	4835089	AT1G14120	0.07861954048	-	28	101.1049995	13.36900022	199.10199740000002
1	4835723	4837771	AT1G14130	0.6488846456	-	16	43.18499947	12.13249993	125.3912497
1	4837926	4839633	AT1G14140	0.3635704657	-	23	76.48000336	12.78250017	195.80200200000002
1	4839800	4840823	AT1G14150	0.23602523649999999	+	148	75.42500305	12.60725014	237.4809975
1	4843183	4845913	AT1G14170	0.4589274063	-	12	40.55999947	19.49750066	138.20025159999997
1	4850116	4852096	AT1G14185	1.087010399	+	12	84.50500107	23.41999936	134.1239979
1	4854223	4855287	AT1G14200	0.8650078006999999	-	38	62.48500061	15.93324919	164.3327438
1	4856777	4857975	AT1G14210	0.6319331036	-	47	49.91999817	12.92000008	163.7680023
1	4861167	4864094	AT1G14230	0.6314383163	+	22	104.2599983	27.53649964	214.778252
1	4868345	4871488	AT1G14250	0.2538469042	+	77	85.5	26.52500057	229.2489975
1	4874874	4877256	AT1G14270	0.8638385044	-	110	127.8399963	28.91349936	235.660994
1	4877505	4879307	AT1G14280	2.007764425	+	221	76.94999695	13.55999994	167.5799942
1	4880029	4882265	AT1G14290	0.09973973780999999	-	39	80.0	12.74700041	166.3504929
1	4882335	4884818	AT1G14300	0.003492877144	-	42	68.36499786	12.65950034	192.5145004
1	4884950	4886793	AT1G14310	0.874363261	+	41	81.62000275	15.61999989	209.7200012
1	4888113	4889704	AT1G14320	1.044210688	+	1590	67.42000198	14.89799986	182.6105007
1	4890068	4892332	AT1G14330	0.1272191825	-	15	72.12999725	13.996000099999998	136.2805
1	4897345	4899035	AT1G14340	0.07326436949	+	18	62.87500191	13.79600005	153.63900569999998
1	4899044	4900054	AT1G14345	0.8654621106999999	+	236	61.40999985	14.65875006	169.28124430000003
1	4911092	4913167	AT1G14360	0.04383201874	-	41	88.63999939	21.43000031	244.9100037
1	4918009	4921682	AT1G14380	0.3125829034	-	65	77.51999664	13.17199993	177.69399719999998
1	4926485	4928812	AT1G14400	0.1450623734	-	352	76.73500061	13.56324978	200.0432491
1	4928920	4931080	AT1G14410	0.060283312740000004	-	39	87.62000275	20.16849985	187.147998
1	4938753	4941332	AT1G14440	0.09223254978	-	34	91.89500046	12.37300043	151.7087517
1	4946191	4947670	AT1G14450	0.1429743137	-	242	52.89500046	12.96200004	153.12124939999998
1	4948637	4953284	AT1G14460	0.5661268304	-	22	105.4349976	26.37850037	193.7592503
1	4961593	4964515	AT1G14510	0.4754349115	-	102	84.16500092	22.50150032	189.17974740000002
1	4968133	4970311	AT1G14520	0.1878178043	-	16	84.55500031	24.50125051	166.46874430000003
1	4980623	4983367	AT1G14560	0.1035370889	+	24	144.3600006	52.86525078	236.5520039
1	4983488	4987375	AT1G14570	0.3525267664	+	83	84.91999817	14.99599991	207.63449330000003
1	4989561	4992805	AT1G14580	0.4773030194	+	99	75.0	18.717000100000003	269.22150120000003
1	4998766	5000710	AT1G14590	0.40235321490000003	-	16	87.05500031	27.73624945	141.5112476
1	5000985	5003637	AT1G14600	0.0008550886185	-	23	120.7399979	27.47349882	223.69999469999996
1	5008152	5014533	AT1G14610	0.17564692350000002	-	95	85.26000214	16.13300014	241.6019958
1	5014674	5016708	AT1G14620	0.1260390354	-	46	74.83499908	14.57624984	153.2787514
1	5027315	5031883	AT1G14650	0.9246951845999999	+	59	90.0	29.45549917	360.93650510000003
1	5037575	5040597	AT1G14670	0.2205419332	+	143	60.91999817	13.28700023	189.6099983
1	5042239	5045556	AT1G14685	0.4635972393	+	75	87.52999878	16.57299972	241.9109955
1	5051655	5055299	AT1G14690	0.5028293181	-	40	76.90000153	11.58974962	273.1547539
1	5058582	5061140	AT1G14700	3.3902077680000002	+	81	122.79000090000001	27.56999969	227.4799957
1	5061693	5065303	AT1G14710	0.4198586733	-	79	92.19000244	14.948	236.9300056
1	5066524	5068677	AT1G14720	0.8301436792	-	102	81.34000015	10.60724986	173.91350559999998
1	5073030	5074798	AT1G14730	0.8840519842	+	13	134.83000180000002	29.75699997	276.9430099
1	5075178	5077981	AT1G14740	0.0008663044167999999	-	62	65.84500122	12.80274987	150.2242558
1	5086594	5088898	AT1G14770	0.102847618	-	14	76.06000137	23.75525026	161.46349750000002
1	5102423	5104850	AT1G14810	0.3956618064	-	151	92.19000244	19.7949996	215.1100006
1	5104974	5107107	AT1G14820	0.04415152201999999	-	29	81.59999847	22.63499928	186.2099991
1	5107415	5111746	AT1G14830	1.0347194929999999	-	116	80.25999832	15.87250006	212.6162548
1	5111700	5115514	AT1G14840	0.08988610873	-	50	102.0299988	18.93974929	263.79599840000003
1	5116522	5123559	AT1G14850	0.6153365332999999	-	23	117.7699966	26.62850094	249.98450930000004
1	5128343	5129731	AT1G14870	0.2227665805	-	25	54.58000183	13.042000199999999	199.0740021
1	5136873	5137982	AT1G14890	0.24306720510000002	+	102	48.61999893	10.38949964	182.84550090000002
1	5138115	5139467	AT1G14900	0.1511787135	-	155	64.66999817	12.99499993	177.3250023
1	5139711	5143735	AT1G14910	2.6917336880000002	-	74	110.6350021	22.90499935	246.15475389999997
1	5148981	5151415	AT1G14920	0.40704097920000004	+	206	72.33000183	17.70375061	161.3375053
1	5165488	5166939	AT1G14980	0.7562756759	-	431	52.88999939	12.515000099999998	152.7624969
1	5166912	5168336	AT1G14990	0.9578341220000001	-	24	104.61999890000001	47.58400164	229.5605034
1	5168595	5170066	AT1G15000	0.8472063835	+	35	71.11000061	15.85300074	144.8994957
1	5172231	5176479	AT1G15020	0.4242660006	-	32	104.0950012	14.30024958	214.92399640000002
1	5177479	5180049	AT1G15030	0.20159675100000002	+	48	112.59500120000001	19.72150083	278.1027401
1	5183257	5187106	AT1G15060	0.1753411181	-	42	92.64500046	37.57400055	276.6890015
1	5193283	5194214	AT1G15100	0.5732603061	-	28	85.45000076	25.45724998	139.77100180000002
1	5198939	5202315	AT1G15110	0.03181484603	+	12	115.0550003	25.42075071	190.52300300000002
1	5202592	5204494	AT1G15120	0.3280940289	+	353	69.73000336	16.66399918	174.6179993
1	5206001	5209979	AT1G15130	1.660960002	-	57	95.30999756	20.96800041	176.7059998
1	5210180	5212349	AT1G15140	0.2832435422	-	118	93.95999908	17.97000003	189.0880062
1	5224293	5226778	AT1G15180	0.05720707732999999	+	82	74.54999924	12.02700005	232.67125430000002
1	5228299	5231184	AT1G15200	0.00391906511	-	80	111.61999890000001	18.93124971	290.18948900000004
1	5238043	5240051	AT1G15215	0.588944382	+	18	78.75	18.53324976	229.08799669999996
1	5240028	5241541	AT1G15220	0.4164655811	-	25	76.80999756	21.66999931	164.97600400000002
1	5242072	5243262	AT1G15230	0.31242591	-	78	56.84499931	20.840750600000003	173.93875119999998
1	5243382	5248693	AT1G15240	0.15025943890000001	+	23	150.5200043	18.73149991	208.4275009
1	5248663	5249676	AT1G15250	0.07116633046	-	155	72.0	16.38700085	181.0005058
1	5249759	5250573	AT1G15260	0.6214424545	+	122	50.62000084	15.37274988	141.462006
1	5250649	5252121	AT1G15270	0.7393063001000001	-	517	56.68000031	13.03599997	141.8789978
1	5252284	5256863	AT1G15280	0.1980704184	+	53	96.06999969	13.89999981	335.87199100000004
1	5256869	5265155	AT1G15290	0.1266797523	-	81	118.6200027	43.20999908	205.08999630000002
1	5275615	5277869	AT1G15340	0.210009993	-	317	55.84999847	11.0960001	161.04499819999998
1	5278026	5279988	AT1G15350	1.070127543	-	50	114.56000139999999	30.61949902	243.1052444
1	5286865	5288640	AT1G15370	1.483200255	+	119	62.04999924	9.435999584	177.44400100000001
1	5290581	5292582	AT1G15380	0.1763248084	+	40	57.47500038	19.43900051	139.8779942
1	5294628	5295931	AT1G15390	0.1659166992	+	81	68.40000153	12.78999996	149.41999819999998
1	5295755	5297075	AT1G15400	0.7728283306	-	144	54.08500099	14.70274982	128.166497
1	5297846	5298571	AT1G05163	0.184870635	-	31	31.53000069	6.417500079	73.01749992
1	5297874	5298166	AT1G15405	0.184870635	-	31	31.53000069	6.417500079	73.01749992
1	5298323	5300927	AT1G15410	0.3665931275	+	43	104.83000179999999	22.678999899999997	272.0494873
1	5301515	5303522	AT1G15420	0.3271599287	-	43	90.27999878	16.675	182.01200409999998
1	5304097	5306087	AT1G15430	0.1400804483	+	15	66.80000305	8.460999846	128.2094963
1	5306026	5309558	AT1G15440	0.1169579078	-	23	100.83000179999999	15.92500029	199.6465012
1	5315498	5317941	AT1G15470	0.08331205741	+	18	94.81499863	11.05049994	131.6167461
1	5317972	5320630	AT1G15480	0.045234044169999994	+	18	64.70999908	22.19225087	147.8535023
1	5320614	5323895	AT1G15490	0.11692726210000001	-	11	131.5599976	21.99499989	219.40000530000003
1	5326289	5328875	AT1G15500	0.03362606544	+	285	75.63999939	16.68899975	220.4569977
1	5329063	5331711	AT1G15510	0.4734373309	+	15	55.58000183	20.01849995	146.8304981
1	5361864	5365559	AT1G15570	3.58818235	+	17	134.3500061	69.17000046	305.16400760000005
1	5365511	5366497	AT1G15580	0.3419681501	-	18	64.43999863	11.23375013	108.8222492
1	5381031	5385380	AT1G15660	0.37626676369999995	+	19	93.91000366	21.12900066	279.79450069999996
1	5389951	5391672	AT1G15670	0.2788959412	+	51	78.81999969	18.57249975	134.3174973
1	5398925	5402733	AT1G15690	0.5351809549000001	+	642	77.89500046	15.69725032	213.04649890000002
1	5402568	5403818	AT1G15700	0.9223685799	-	15	71.84999847	21.67300062	236.23249359999997
1	5404129	5405910	AT1G15710	0.2737795651	+	36	61.24500084	18.98625064	155.472496
1	5407400	5410043	AT1G15730	0.48267458119999995	-	106	94.33499908	15.06250012	263.0737476
1	5410907	5414919	AT1G15740	1.162604707	+	101	113.91999820000001	13.82999992	239.7549973
1	5414816	5421033	AT1G15750	0.008441411305	-	102	123.2549973	28.07224975	383.5905006
1	5430039	5436618	AT1G15780	0.08489528762	-	38	104.33499909999999	30.09399915	204.0759972
1	5441071	5443911	AT1G15800	0.040733717569999994	-	32	92.86499786	17.80474997	195.3579948
1	5444219	5446564	AT1G15810	0.6549075010000001	+	45	86.26999664	43.17599907	165.84999390000002
1	5446461	5447880	AT1G15820	1.011307221	-	11318	64.19000244	14.559250400000002	158.0830013
1	5454765	5457022	AT1G15860	0.6607174675999999	+	77	83.30000305	17.20499964	197.38100590000002
1	5458397	5460359	AT1G15880	0.40609813619999996	-	74	77.65999985	17.07725058	223.099744
1	5460476	5461297	AT1G15885	0.2670514229	+	21	74.80999756	31.84000015	154.0699997
1	5465250	5469180	AT1G15910	0.3847609314	+	29	61.91999817	13.24300022	156.9870071
1	5469254	5471149	AT1G15920	0.01804296641	+	30	57.06000137	15.10674939	170.3090019
1	5471315	5473048	AT1G15930	5.941531102000001	+	829	62.79999924	13.81099997	168.652005
1	5473358	5478405	AT1G15940	1.21867609	+	36	89.79499817	14.78124964	255.8287506
1	5478602	5482180	AT1G15950	0.6837396768999999	+	314	63.31500053	13.17725034	181.286245
1	5486272	5489132	AT1G15970	0.13750497550000002	-	25	95.44000244	14.38999977	193.2820007
1	5489144	5491363	AT1G15980	0.19893263760000002	+	441	79.12999725	17.04000092	194.91999819999998
1	5494532	5495359	AT1G16000	0.33714533210000003	+	44	60.57999992	17.02374997	120.18399699999999
1	5495372	5497723	AT1G16010	0.333361041	-	67	113.8600006	22.27950048	254.36250609999996
1	5498011	5501358	AT1G16020	1.006583285	+	32	75.38000107	20.43475068	200.18875469999998
1	5501965	5504535	AT1G16030	0.8815823301000001	-	12	94.61000061	22.4782495	164.05874330000003
1	5504607	5507059	AT1G16040	0.025550581370000002	+	27	103.3199997	26.13899975	195.4879974
1	5508310	5511736	AT1G16060	0.0004463084087	+	14	83.52999878	19.95550022	310.2989899
1	5514261	5516027	AT1G16080	0.55106315	+	206	79.02999878	16.20124984	209.433754
1	5538665	5540002	AT1G16170	0.23378386690000003	-	70	93.65999985	18.05650072	171.9017498
1	5540049	5542902	AT1G16180	0.1303080499	+	245	60.47999954	12.72100029	201.6479996
1	5543118	5546103	AT1G16190	0.00211935949	+	29	111.5	27.88300018	244.76599879999998
1	5546098	5547753	AT1G16210	0.624031824	-	149	56.45999908	11.11899967	161.548996
1	5554842	5556844	AT1G16240	1.092635339	-	195	71.15000153	16.2285008	191.7154945
1	5559497	5562192	AT1G16260	0.7009490676000001	-	27	91.62000275	31.28900108	258.5449974
1	5562860	5568368	AT1G16270	1.023614167	+	22	83.73500061	13.33449998	470.63125149999996
1	5567741	5570679	AT1G16280	0.07450135557	-	13	62.84999847	23.37800045	136.85899809999998
1	5580820	5582154	AT1G16320	0.4153712823	+	208	59.69000053	15.5215003	152.7267529
1	5587721	5590761	AT1G16340	0.1416174588	-	22	119.5349998	15.94200044	188.89200019999998
1	5590755	5593098	AT1G16350	0.7723884571999999	+	69	75.27999878	19.31900024	214.93200380000002
1	5602785	5604770	AT1G16390	0.12140350609999999	+	16	72.46500015	20.75374985	198.7637444
1	5605043	5607498	AT1G16400	0.055904542620000004	+	16	79.92499924	11.53125	142.7537479
1	5608681	5612064	AT1G16410	1.773091369	+	106	55.52000046	15.69250011	196.85250280000002
1	5614592	5615660	AT1G16430	0.17393671230000002	+	15	105.75	46.89750137	169.17800060000002
1	5619544	5622674	AT1G16460	0.42404645189999995	-	103	81.87999725	16.33700037	263.2824951
1	5622745	5625683	AT1G16470	0.09808537422000001	+	126	73.39500046	11.96000016	198.54250530000002
1	5638778	5640202	AT1G16500	1.050344532	+	17	87.72000122	11.17600031	193.2579956
1	5644571	5645443	AT1G16510	0.04700342272	-	12	75.15000153	17.40149984	123.24650120000001
1	5648635	5651167	AT1G16520	0.08424314997000001	+	13	66.04000092	19.18100033	197.60799709999998
1	5659369	5665488	AT1G16540	0.014242400580000002	+	11	154.08999630000002	16.0374999	210.7250023
1	5668383	5670708	AT1G16560	0.7507483962999999	+	77	74.84999847	16.16099997	213.6090057
1	5670576	5673600	AT1G16570	0.9006081614	-	20	104.45500179999999	26.54025006	159.9110035
1	5675494	5678873	AT1G16610	0.41045006840000003	-	101	86.23000336	12.51499987	207.0
1	5697215	5699870	AT1G16670	0.060974211449999996	+	13	91.30999756	13.93399997	148.17300569999998
1	5702152	5705892	AT1G16680	0.3740760405	+	27	103.9300003	17.89000001	215.315509
1	5705896	5709563	AT1G16690	0.18972170260000001	+	14	98.93500137	36.23125081	282.15549619999996
1	5709623	5712043	AT1G16700	1.844704315	+	125	73.20999908	16.52099972	257.1499908
1	5713793	5722614	AT1G16710	0.25380504649999996	+	21	111.16999820000001	27.20500088	203.1200027
1	5722890	5726478	AT1G16720	0.37187853579999997	+	330	83.47499847	11.96475022	248.713998
1	5726367	5727406	AT1G16730	0.05020452348	-	61	49.31000137	11.46999979	184.36999509999998
1	5727621	5729115	AT1G16740	0.05072602004	+	90	69.47000122	9.628749704	176.21650469999997
1	5729056	5731934	AT1G16750	0.06990723746000001	-	27	112.5199966	29.89749908	237.8280022
1	5739467	5744636	AT1G16780	0.7162708671	-	15	161.3000031	78.42100067	241.23700490000002
1	5744334	5745259	AT1G16790	0.3769703031	+	29	53.83000183	14.1789999	149.8659966
1	5755587	5756895	AT1G16810	0.011769479579999999	+	219	58.63000107	13.07649999	170.84650269999997
1	5758854	5760509	AT1G16825	1.005634042	+	19	67.56999969	19.33600001	169.8649994
1	5762693	5764184	AT1G16840	0.3331815283	-	100	90.81000137	13.82674978	257.2867512
1	5767299	5770602	AT1G16860	0.0528718309	+	51	73.91999817	23.97250032	186.37999340000002
1	5770731	5773322	AT1G16870	0.3079115902	-	46	72.79000092	19.52875042	190.4749947
1	5773511	5776308	AT1G16880	0.2966456503	+	504	103.11000059999999	34.49200144	255.80850330000004
1	5776176	5778529	AT1G16890	0.9759899587	-	298	72.30500031	14.26925032	183.80649340000002
1	5779007	5782433	AT1G16900	0.06844475819	-	24	98.57999802	20.40750053	259.0017441
1	5786556	5787329	AT1G16916	0.1493773984	-	42	66.04999924	11.64525006	144.1747559
1	5787149	5789312	AT1G16920	2.074870058	-	107	66.0	14.07349968	187.8149994
1	5789678	5791752	AT1G16930	0.8350587559999999	+	12	108.6649971	50.19750042	190.30325159999998
1	5799740	5800887	AT1G16960	0.9146856865999999	+	49	84.40000153	17.60200005	257.4339905
1	5800766	5805811	AT1G16970	0.3250555869	-	18	123.32500459999999	19.11950083	234.34424819999998
1	5820079	5822013	AT1G17020	0.04830207842	+	13	43.24000168	15.63099995	137.0999954
1	5828914	5831383	AT1G17050	0.018392694719999998	+	119	70.73000336	14.77349973	214.96599500000002
1	5837589	5840332	AT1G17070	0.7619473715999999	+	12	84.47999954	39.18775024	122.11000039999999
1	5840268	5841745	AT1G17080	0.555421492	-	147	61.59000015	9.789999866	212.81249469999997
1	5844645	5845661	AT1G17100	0.4041016477	+	144	48.84499931	14.98849998	167.3427505
1	5845674	5850934	AT1G17110	0.4824156937	-	37	126.41999820000001	24.64000044	241.1130051
1	5851859	5853987	AT1G17120	0.1087449442	+	44	64.375	20.4257504	198.40699919999997
1	5854092	5856697	AT1G17130	0.5668255306000001	+	66	69.63999939	10.20875013	186.1562481
1	5856572	5858550	AT1G17140	0.6209187708	-	60	82.34000015	20.632499600000003	227.69724810000002
1	5860077	5862890	AT1G17145	1.134992089	-	33	136.22000119999998	28.42200012	226.5039978
1	5863108	5864059	AT1G17147	0.3744163854	-	14	81.90000153	17.49224987	165.7177437
1	5867534	5869436	AT1G17160	0.3169988223	+	49	75.19000244	12.53199997	178.31199650000002
1	5869542	5870883	AT1G17170	1.914409402	+	28	85.67000198	18.63774977	144.1290009
1	5875294	5876620	AT1G17190	0.5822395462	+	40	56.45499992	11.36475008	143.2695
1	5878389	5880073	AT1G17200	3.848236097	+	234	72.19499969	14.21324999	176.0252483
1	5879995	5884773	AT1G17210	1.135131	-	78	84.29999924	24.24049983	168.4680023
1	5885006	5890500	AT1G17220	0.2247478061	+	315	91.83999634	22.02049932	243.8055054
1	5916831	5920393	AT1G17280	0.027147893030000002	-	135	82.80999756	16.7880002	263.5945068
1	5922331	5926400	AT1G17290	0.6109796338	+	203	81.54000092	21.74500008	220.4004951
1	5929825	5931926	AT1G17330	0.1683801699	+	23	102.16999820000001	14.50399995	294.8514946
1	5933779	5938817	AT1G17340	1.6146253430000002	+	17	96.87999725	46.24199982	208.67999880000002
1	5941548	5944465	AT1G17350	0.58530298	+	19	105.27999879999999	12.16600022	183.1585014
1	5946447	5951561	AT1G17360	0.4640870182	+	37	69.33000183	16.38700008	223.087001
1	5951541	5955143	AT1G17370	1.4928897209999998	-	180	66.78499985	16.53575025	240.8365002
1	5968409	5969995	AT1G17410	0.09930442527999998	-	13	138.3099976	20.8699995	277.3759903
1	5977322	5981521	AT1G17420	0.2624294137	+	13	78.25	11.35700006	110.5310013
1	5983983	5987934	AT1G17440	0.053096837699999996	-	33	105.90000149999999	9.437999725	203.4780029
1	5988279	5997033	AT1G17450	0.00107844671	-	17	105.84999850000001	33.04399872	199.4660034
1	5997056	5998599	AT1G17455	0.1020347804	+	16	86.5	34.11249971	146.47000119999998
1	6002887	6006410	AT1G17470	0.6216019993999999	+	143	83.5	15.65450053	220.9419952
1	6008436	6009420	AT1G17490	0.3775518124	+	55	50.18999863	12.7315002	117.745002
1	6017807	6023503	AT1G17500	0.17317824210000002	+	15	85.41999817	37.85850048	161.96149599999998
1	6023503	6024309	AT1G17510	0.2354053695	-	27	45.25999832	13.94600015	178.0874992
1	6024635	6027565	AT1G17520	0.7223234934999999	-	26	79.46999741	16.72625005	202.46875380000003
1	6027486	6029115	AT1G17530	0.9575412722	+	77	62.18000031	10.29799995	171.46000669999998
1	6034269	6037398	AT1G17550	0.45644828020000006	+	75	101.8700027	23.54150019	235.748494
1	6037404	6038698	AT1G17560	0.482106185	-	13	69.31999969	23.0369997	151.50500490000002
1	6039249	6049685	AT1G17580	1.584796009	+	20	86.40000153	22.20825016	189.6637497
1	6061894	6063362	AT1G17620	1.5717612980000002	+	70	69.82999802	13.50449979	169.3362514
1	6069423	6072140	AT1G17650	1.207452062	-	44	80.05000305	10.98524997	170.4060001
1	6076070	6082395	AT1G17680	0.8003980223	+	17	144.96000669999998	37.77400055	250.9440063
1	6082721	6088381	AT1G17690	0.33626809729999996	-	19	140.6000061	19.546500299999998	252.25999680000004
1	6089459	6090339	AT1G17700	0.4882921217	+	18	53.66999817	19.68375087	162.77450290000002
1	6093184	6098443	AT1G17720	0.3913600285	-	50	97.20999908	18.20799947	193.1242504
1	6099038	6100397	AT1G17730	0.61849981	+	91	84.41000366	10.51250029	241.7049904
1	6100963	6105347	AT1G17745	0.1422549699	+	14	47.63500023	14.321499900000001	184.4892437
1	6110106	6116617	AT1G17760	0.46992089979999996	-	23	105.3899994	11.2529995	278.27700039999996
1	6123566	6125339	AT1G17780	0.3975338881	+	44	89.00500107	15.32274997	214.83524780000002
1	6125277	6127567	AT1G17790	0.05038914456	-	12	113.295002	16.49575039	273.2727562
1	6131063	6135345	AT1G05333	0.2520169704	-	17	85.91999817	24.36600075	136.776001
1	6131536	6135345	AT1G17820	0.2520169704	-	17	85.91999817	24.36600075	136.776001
1	6142401	6146521	AT1G17840	0.04893838322	+	171	88.58000183	21.06999969	185.0774956
1	6145925	6148940	AT1G17850	0.07145962407999999	-	23	115.65000149999999	25.15750074	292.8249939
1	6149300	6150038	AT1G17860	0.1712637668	+	61	48.33000183	9.059999943	116.7700005
1	6149938	6152222	AT1G17870	2.017405473	-	42	68.3599968	14.79450021	167.5135067
1	6152383	6153982	AT1G17880	0.1193424144	-	680	62.06999969	13.23975	176.9699982
1	6154263	6155804	AT1G17890	0.2588368399	-	48	75.97999954	16.03800018	131.1577518
1	6169284	6173273	AT1G17940	2.021601443	-	23	121.04000090000001	32.95849934	233.686998
1	6184716	6187499	AT1G17970	0.6958203828	+	32	121.75	15.43124974	179.1650043
1	6187464	6191708	AT1G17980	0.4977571792	-	40	115.58499909999999	26.85550008	189.0477448
1	6192032	6194093	AT1G17990	1.7568391319999999	-	95	124.1900024	44.52550087	298.2275055
1	6194425	6196343	AT1G18000	0.8046112969	-	96	81.93500137	24.73375058	166.8862514
1	6199689	6201759	AT1G18010	0.8046112969	+	96	81.93500137	24.73375058	166.8862514
1	6202234	6204234	AT1G18020	1.74609562	+	96	124.4400024	45.0037508	326.9850006
1	6204258	6206988	AT1G18030	0.4766405553	+	19	137.3600006	34.03950005	214.4900047
1	6211831	6213591	AT1G18060	0.6591485256	-	261	72.27999878	21.9100008	186.9749985
1	6213650	6218384	AT1G18070	0.27636821289999997	-	166	84.81999969	17.99124908	203.8699989
1	6222200	6224242	AT1G18080	1.364301024	+	946	59.75500107	14.71124983	164.478754
1	6244297	6247830	AT1G18150	0.01735183269	-	69	99.55999756	22.9210001	183.3350006
1	6248618	6254080	AT1G18160	0.23080682530000002	+	30	131.10999679999998	28.70150096	221.02399440000002
1	6254093	6255734	AT1G18170	0.5402176225	+	87	73.15000153	10.41300015	170.8649979
1	6257850	6261501	AT1G18190	0.1871375773	-	12	65.70499802	22.07274914	326.4102577
1	6266608	6268939	AT1G18210	0.4529415925	-	79	58.84999847	16.35499978	158.1059937
1	6276776	6278258	AT1G18250	0.3881868972	-	19	72.87000275	17.27450056	186.9185013
1	6278787	6282144	AT1G18260	1.3684069419999998	-	47	97.73999786	20.36699953	224.9789978
1	6283369	6293993	AT1G18270	0.01821643186	-	25	130.2100067	18.80999947	241.65600279999998
1	6299668	6301139	AT1G18300	0.0394012209	+	23	83.65000153	30.78749943	185.62800369999997
1	6304359	6305689	AT1G18320	0.3095770432	+	28	92.31999969	19.28299975	207.410252
1	6305813	6308243	AT1G18330	4.351924223	-	115	109.7300034	28.50449944	213.985006
1	6311442	6313931	AT1G18340	1.837663492	-	16	76.22500229	11.23750031	211.43749810000003
1	6316694	6319427	AT1G18360	0.001571128885	-	46	90.53000259	16.07124972	194.666254
1	6331397	6333856	AT1G18400	0.1062894507	+	63	95.86000061	18.18600016	237.1764984
1	6345973	6347918	AT1G18440	0.2438971239	+	26	119.1749992	28.26000023	211.880003
1	6348047	6352010	AT1G18450	0.205710822	+	73	70.23000336	13.66600018	249.73799440000002
1	6352324	6356113	AT1G18460	1.198091268	+	62	87.81000137	24.48150005	185.0315014
1	6355694	6360344	AT1G18470	0.011206285729999998	-	51	97.48000336	14.52999997	295.69499210000004
1	6361585	6363061	AT1G18480	0.8300262090999999	+	41	87.80000305	16.85000038	188.75
1	6363041	6366263	AT1G18485	1.388694668	+	14	118.5049973	21.67450036	282.3730034
1	6366519	6368879	AT1G18490	0.4861898441	+	38	80.47999954	27.44199944	173.99700049999998
1	6368965	6373080	AT1G18500	0.8659158253	+	118	86.77000046	15.91100078	185.0029945
1	6376638	6378580	AT1G18540	0.02096059986	-	676	61.11999893	11.24499977	169.0512543
1	6389398	6391386	AT1G18570	0.227645452	+	24	94.09000015	44.54525013	163.0347458
1	6395768	6398274	AT1G18580	0.2539440362	+	31	82.06999969	20.73749971	182.1699944
1	6398530	6400029	AT1G18590	0.3511122358	+	43	65.33000183	18.97700033	179.3599968
1	6400281	6402794	AT1G18600	0.8080893994	+	33	96.23000336	25.96600075	278.02998660000003
1	6409654	6414569	AT1G18620	0.4322910004	+	94	96.13499832	14.5147505	211.78875159999998
1	6414608	6416459	AT1G18630	0.4900418159	+	48	74.69499969	13.58975012	183.96824990000002
1	6416168	6418693	AT1G18640	0.03687207878	-	53	71.87999725	18.95600033	200.99800109999998
1	6418837	6421188	AT1G18650	1.184840532	-	117	63.61999893	11.39100008	232.6810028
1	6420855	6425898	AT1G18660	0.018107119209999998	+	61	134.67999269999999	16.32000017	283.44000239999997
1	6426708	6431093	AT1G18670	0.20035137390000002	-	16	121.9449997	34.6600008	196.527504
1	6431937	6433552	AT1G18680	0.06960061159	-	31	69.51999664	13.62000036	155.6624947
1	6437473	6444076	AT1G18700	0.27278109440000003	+	34	104.09499740000001	40.35224962	226.87524950000002
1	6450584	6453263	AT1G18710	0.9445464059	+	113	97.12000275	18.46000023	214.54600519999997
1	6457774	6460405	AT1G18720	0.012464006920000001	-	149	66.54000092	13.34700012	216.1610062
1	6460402	6462344	AT1G18730	1.240650083	+	346	75.21500015	14.12625003	229.90375330000003
1	6463921	6465476	AT1G18740	0.11517939	+	34	72.91500092	18.76674953	133.0189989
1	6465486	6466454	AT1G18745	0.616851826	-	28	136.9950027	24.01874962	279.9440002
1	6474801	6475979	AT1G18773	0.9608513545999999	+	21	133.3999939	20.21500015	249.390007
1	6481112	6483646	AT1G18800	0.41790781520000003	-	99	73.91999817	17.90149937	182.9259987
1	6485514	6487153	AT1G18810	0.7833575457999999	-	47	76.95999908	18.63600016	248.4895035
1	6500802	6504567	AT1G18840	0.3127179082	-	67	80.76999664	20.30600004	197.1554939
1	6504676	6506542	AT1G18850	1.775162044	-	33	46.27999878	12.70200005	155.67200319999998
1	6520720	6523368	AT1G18880	0.9765473687999999	+	27	59.31999969	14.71500034	154.0124962
1	6522763	6526075	AT1G18890	0.47733109	-	35	87.12000275	25.32999973	261.6690025
1	6528983	6532697	AT1G18900	0.9994495365	+	17	80.16999817	46.97599945	271.1460022
1	6546176	6552108	AT1G18950	0.6319449143	+	30	91.96500015	28.45600019	200.0240044
1	6560490	6562791	AT1G19000	2.171512139	-	528	76.78499985	14.80150034	178.5847454
1	6565493	6567662	AT1G19010	0.38797703240000003	+	20	112.2000008	33.46475019	183.7862461
1	6568001	6568705	AT1G19020	0.3421275017	+	15	55.68000031	9.772500134	86.58000069
1	6577832	6579314	AT1G19050	0.025897882809999998	-	22	61.61999893	17.72374949	181.30649530000002
1	6584240	6586517	AT1G19080	0.09043930152999999	+	38	148.9349976	28.8912498	364.3469994
1	6594882	6601355	AT1G19100	0.35581035969999997	+	18	135.84500119999998	23.7222496	291.55350150000004
1	6602104	6606028	AT1G19110	0.20821229030000002	+	50	82.79500198	27.75924954	221.6499969
1	6608114	6609369	AT1G19120	0.16830884399999999	+	99	74.66999817	20.06350021	155.9704971
1	6609324	6610613	AT1G19130	0.1921074382	-	67	104.3499985	12.33799996	244.01050419999999
1	6610651	6612609	AT1G19140	0.1762405039	-	43	73.19999695	17.8864996	208.713501
1	6612629	6613972	AT1G19150	0.32643539190000004	+	457	64.87999725	10.60200005	175.6440063
1	6616601	6619006	AT1G19170	0.7869576228	+	22	87.07500076	23.28425045	169.7267433
1	6621776	6623668	AT1G19180	0.178340985	+	72	61.98500061	14.29524977	175.43099819999998
1	6627682	6633133	AT1G19220	0.4434492033	-	31	115.0	43.21999931	174.517498
1	6649242	6650446	AT1G19240	0.009051143997	-	33	58.27999878	12.99600029	121.7339996
1	6662416	6666032	AT1G19270	0.2910989032	+	14	135.6800003	39.10550022	206.02524530000002
1	6671094	6672777	AT1G19300	0.49365853299999995	-	26	77.97000122	16.81375027	138.0412521
1	6676209	6677680	AT1G19310	0.9759364789	-	50	80.54500198	11.34875031	199.6097561
1	6680422	6683559	AT1G19330	0.09706096565	-	42	78.80500031	14.38549984	193.3814983
1	6688462	6691216	AT1G19350	1.137319652	+	214	88.02000046	15.21524987	223.47799840000002
1	6690398	6692566	AT1G19360	0.1420680114	-	64	59.07999992	19.475749899999997	143.8412483
1	6692723	6695055	AT1G19370	0.3978913002	-	17	71.55000305	23.37999992	120.852002
1	6697873	6698858	AT1G19380	1.776598977	+	23	83.58999634	38.75399952	158.2035049
1	6709777	6711788	AT1G19396	0.10013693550000001	+	19	65.58000183	20.6915	144.75299990000002
1	6712021	6714483	AT1G19400	0.10525659009999999	-	216	75.54499817	12.84124982	193.11999699999998
1	6724412	6728075	AT1G19430	0.2909274693	-	39	70.34999847	23.12650003	185.4154976
1	6728746	6730931	AT1G19440	0.2720038905	+	22	81.55500031	21.79200029	266.047747
1	6731410	6735024	AT1G19450	0.3344663005	-	91	101.9000015	15.81750035	264.8025017
1	6744352	6746635	AT1G19480	0.03634579348	+	12	75.56000137	19.81699982	210.36650350000002
1	6746777	6751609	AT1G19485	0.38449027729999996	+	15	171.9400024	99.11899872	245.2059998
1	6759858	6762847	AT1G19520	1.107692589	+	38	75.40500259	16.04099958	201.52175060000002
1	6763764	6765049	AT1G19530	0.2013270458	+	50	56.79500008	12.07424998	139.4485001
1	6765652	6768290	AT1G19540	0.124797265	+	15	112.5699997	41.52650051	315.9364952
1	6773301	6774523	AT1G19570	1.726714375	-	862	72.35499954	17.30999947	184.2942448
1	6774682	6777568	AT1G19580	0.2428833243	+	61	79.44000244	16.07500029	170.8799973
1	6778886	6781222	AT1G19600	0.32733908170000003	+	107	80.84999847	14.9165	295.44651339999996
1	6781482	6782216	AT1G19610	0.3845833608	-	12	67.10499954	35.45050097	149.5744957
1	6796136	6799764	AT1G19650	0.5689111572	-	28	96.53499985	27.18775039	249.7450016
1	6799968	6802906	AT1G19660	1.005742121	-	254	77.65999985	13.53524957	226.5600037
1	6803485	6805092	AT1G19670	1.179389797	-	184	59.28499985	15.12374978	166.490498
1	6805429	6807862	AT1G19680	2.4891513730000003	+	61	105.95999909999999	20.50500011	205.0249939
1	6807714	6809642	AT1G19690	0.0584415071	-	16	127.34999850000001	25.15000057	311.7675018
1	6809584	6813063	AT1G19700	0.322867639	-	70	97.99500275	16.09950063	250.5040001
1	6814703	6816876	AT1G19710	0.1262938006	+	26	71.55500031	22.16375029	266.85375600000003
1	6816701	6819542	AT1G19715	0.1263133706	-	47	130.1000061	38.32850113	224.1604935
1	6819563	6822711	AT1G19720	0.04397655674	-	55	103.79000090000001	26.97900028	218.3195023
1	6822846	6824071	AT1G19730	0.11025352869999999	-	54	78.52500153	20.28324957	136.96949809999998
1	6824321	6825459	AT1G19740	0.0029703115629999997	+	316	67.22999954	13.551250099999999	165.9950008
1	6832324	6833837	AT1G19770	1.024442309	+	153	81.30000305	20.64799957	176.623999
1	6846337	6848128	AT1G19800	0.07583827821	+	72	75.09000015	17.81825037	231.24400519999998
1	6855898	6860563	AT1G19835	0.3131384721	-	36	78.46500015	21.08375001	181.4600029
1	6886668	6891404	AT1G19850	0.04362439366	+	21	79.63999939	24.31499958	185.71499630000002
1	6891381	6894752	AT1G19860	0.3312789245	-	29	66.77999878	14.57800064	204.77799530000001
1	6895008	6898818	AT1G19870	0.3172387066	-	64	91.59999847	20.64600027	180.343
1	6900336	6904155	AT1G19880	0.9985941984000001	-	43	83.12000275	18.52800083	244.6614944
1	6913000	6914634	AT1G19910	0.9419353708	+	555	56.90000153	15.59449964	176.7229996
1	6914517	6916823	AT1G19920	0.002904762279	-	102	79.38500214	20.53749967	215.82774730000003
1	6927735	6928656	AT1G19960	0.3152821382	+	31	55.77000046	11.33749986	132.347496
1	6931011	6932826	AT1G19970	0.17717709210000002	-	13	96.40000153	20.70600014	234.90199429999998
1	6935217	6936928	AT1G19990	0.4727882588	+	32	96.47000122	16.68199964	262.8937546
1	6937718	6940832	AT1G20010	0.6011810139	-	309	60.63000107	13.488000199999998	163.5209946
1	6942624	6945091	AT1G20020	0.858304409	+	800	116.18500139999999	18.47774954	245.9232517
1	6945424	6947344	AT1G20030	0.03992601398	+	18	58.35000038	18.84800038	117.9079987
1	6949042	6950509	AT1G20050	0.7693896631	+	120	68.39500046	17.46975002	176.7482441
1	6958009	6959123	AT1G20070	1.148439651	-	11	44.24000168	10.07999992	131.78250500000001
1	6966841	6969009	AT1G20090	1.208193353	+	101	69.95999908	13.04000044	174.33000180000002
1	6969024	6971036	AT1G20100	1.7262071890000001	-	101	136.8099976	19.25	309.69000239999997
1	6971423	6975130	AT1G20110	0.6556252672	+	80	86.625	13.00949996	190.7167458
1	6986311	6987863	AT1G20140	0.3084335109	+	32	73.39500046	33.74450002	221.165752
1	6990641	6993989	AT1G20160	0.19252244079999997	-	36	55.19999886	15.59125078	184.9750061
1	6998334	6999839	AT1G20190	0.40502576549999997	-	131	88.27999878	25.36499977	199.5250053
1	7001086	7004432	AT1G20200	0.21030106070000001	-	134	73.04000092	16.71149979	182.4674984
1	7004823	7007717	AT1G20220	0.3092299454	-	140	58.20499992	12.06074982	178.29424709999998
1	7007755	7009380	AT1G20225	0.6971548545	-	130	48.18000031	13.75150011	186.5917564
1	7016598	7020690	AT1G20260	0.7187196851000001	+	246	80.49500275	17.57749939	254.65624619999997
1	7020663	7023162	AT1G20270	1.115253968	-	22	74.75500107	16.81400054	210.9412518
1	7029628	7031535	AT1G20300	0.03023294722	+	13	81.52999878	15.89999981	108.20400009999999
1	7038526	7040231	AT1G20330	1.7907978740000001	-	298	62.23999977	14.61224999	156.5072479
1	7042045	7043392	AT1G20340	3.003964133	-	11894	51.01499939	13.11999989	142.8767517
1	7051576	7053745	AT1G20370	0.5790356151	-	25	58.79000092	15.31800022	224.6939941
1	7078803	7082566	AT1G20410	0.06707226022999999	-	11	106.2300034	48.11749935	150.34249499999999
1	7083011	7083910	AT1G20430	0.03251636341	-	105	59.88000107	14.55999985	134.0080017
1	7084408	7086873	AT1G20440	1.6249071919999998	-	508	61.56999969	11.17725	156.7005051
1	7087902	7089606	AT1G20450	2.2296013880000003	-	356	57.05500031	11.31374979	149.62249369999998
1	7090940	7093442	AT1G20460	0.0033642050349999997	+	30	75.875	22.38175015	164.28399850000002
1	7094259	7094869	AT1G20470	0.2598141177	+	16	82.77000046	18.35874987	178.4349995
1	7103361	7106121	AT1G20510	1.245514642	-	54	81.15999985	23.10024929	212.57325209999996
1	7112610	7115362	AT1G20540	0.04201766274	+	41	142.83000180000002	28.42000008	273.11999510000004
1	7119670	7121871	AT1G20560	1.299360302	-	36	94.96500015	7.238750041	190.26874730000003
1	7126746	7128762	AT1G20575	0.03580208556	-	35	96.30000305	12.26400011	192.86449430000002
1	7128866	7130799	AT1G20580	0.03529815026	+	189	64.30000305	13.10699968	189.2810013
1	7142971	7146540	AT1G20620	3.9964344780000003	+	2756	77.56999969	16.23749971	211.1699944
1	7146635	7150180	AT1G20630	0.7405238414	+	84	101.71500019999999	21.81875081	204.59700159999997
1	7154409	7158287	AT1G20640	0.8652366086	+	21	59.06999969	21.25499916	93.72999954
1	7157825	7160590	AT1G20650	0.1147619466	-	133	97.76999664	18.99300079	200.287001
1	7164081	7168041	AT1G20670	0.04070068759	-	27	92.26000214	21.32999983	160.5375
1	7176746	7178895	AT1G20693	0.33207522	+	581	73.33000183	14.23999977	182.3649979
1	7179272	7181574	AT1G20696	1.074002153	+	385	77.76999664	29.42999992	209.5879974
1	7209297	7214993	AT1G20760	1.329563398	+	58	112.875	29.41350007	227.9192539
1	7215009	7216897	AT1G20770	1.269245531	-	48	93.77500153	17.67324989	231.48499569999998
1	7217020	7220842	AT1G20780	0.44323492259999997	+	13	88.54000092	51.28600006	206.8649979
1	7231980	7233657	AT1G20810	0.7587930443	+	109	103.2799988	22.35900002	224.03899840000003
1	7233653	7235128	AT1G20816	1.29021381	+	42	84.65499878	17.33375034	179.5564972
1	7238692	7239698	AT1G20823	0.07178937642000001	+	15	61.70000076	17.2	142.3685017
1	7242895	7244978	AT1G20830	0.3724029796	+	30	76.03499985	31.953749900000002	152.9982487
1	7244938	7248494	AT1G20840	0.4550995372	-	17	89.51999664	58.99400024	181.8419983
1	7252110	7253747	AT1G20850	0.9811632215	+	94	52.93000031	14.58124983	135.4707485
1	7262008	7265555	AT1G20880	0.5258738332	-	25	111.8700027	12.4920002	255.51399840000002
1	7265793	7267377	AT1G20890	0.05428413832	-	27	69.19000244	14.21349993	195.89599990000002
1	7272555	7274072	AT1G20900	0.1290836974	+	21	63.04000092	19.21000051	130.0000038
1	7276942	7281236	AT1G20910	0.05944893937000001	-	31	105.5899963	8.857500196	228.1674957
1	7285041	7289943	AT1G20920	0.4714276282	+	33	89.06999969	18.78999958	273.12800899999996
1	7292388	7294746	AT1G20930	0.0154685917	-	14	85.52500153	15.67674975	213.98900030000001
1	7297238	7301633	AT1G20950	0.1938099034	-	72	91.42000198	16.96399937	197.5317539
1	7301598	7310271	AT1G20960	1.6125457719999998	-	94	68.59500122	16.85250058	166.40749590000001
1	7313900	7319921	AT1G20970	0.15252257130000002	+	49	78.58000183	19.1140007	168.25600590000002
1	7324470	7329441	AT1G20980	0.2791648597	+	57	97.66000366	31.88199921	172.30799869999998
1	7337604	7339452	AT1G21000	1.215439907	+	239	87.5	15.32200036	214.2559998
1	7346155	7347283	AT1G21010	0.6041786668	+	33	59.75	30.96599922	186.6959961
1	7366589	7368203	AT1G21050	0.8410294826000001	+	181	68.40000153	12.92000008	172.2700043
1	7371656	7374114	AT1G21060	0.18427953309999998	+	48	125.08000179999999	35.07900009	271.8672569
1	7374114	7375789	AT1G21065	0.9576456949	+	459	73.41000366	15.72349963	218.39650189999998
1	7375868	7378227	AT1G21070	0.004884812620000001	-	14	68.64500046	42.799499700000005	192.3897476
1	7378537	7382661	AT1G21080	0.07033400386	-	75	81.26999664	18.51949949	203.37899860000002
1	7384559	7386580	AT1G21090	0.047396455530000006	+	11	62.0	23.18000031	156.96499630000002
1	7386761	7388512	AT1G21100	0.09869649817	-	50	76.88000107	19.2242496	150.1920036
1	7398813	7400736	AT1G21130	6.995264003	-	346	85.46500015	17.01874948	199.2987461
1	7412829	7419643	AT1G21170	1.053078455	+	11	117.3700027	28.99249983	220.8250008
1	7419663	7420957	AT1G21190	0.3040332139	-	98	68.70500183	14.34125042	180.77449950000002
1	7421147	7423673	AT1G21200	0.09100082021	+	24	85.45000076	21.53874986	183.64475249999998
1	7442217	7442979	AT1G21260	1.315393317	-	13	44.34999847	8.914999962000001	90.03700104
1	7444748	7448483	AT1G21270	0.5664817490999999	+	45	85.68000031	15.69100037	181.42200469999997
1	7447489	7448483	AT1G21280	5.2058469420000004e-05	-	21	58.81000137	28.67000008	194.7750015
1	7453244	7455009	AT1G21310	1.0655449259999998	-	87	72.69999695	23.08350077	161.8669975
1	7476901	7479258	AT1G21350	0.3630487736	-	114	86.11999893	14.79325023	234.9187466
1	7483780	7485666	AT1G21370	0.18455819850000002	+	15	77.0	22.84999962	218.42049900000004
1	7485635	7488780	AT1G21380	0.2288464017	-	53	91.40000153	28.93599968	265.9279953
1	7493212	7496741	AT1G21400	0.8899633123999999	+	203	97.73000336	20.24750071	226.0529938
1	7496997	7499616	AT1G21410	1.4079826869999998	+	72	71.51499939	11.08475013	231.77325359999998
1	7502081	7504275	AT1G21440	0.1599300407	-	75	97.26999664	18.70149951	239.1335014
1	7508700	7511801	AT1G21450	0.05992241165	+	56	82.82500076	22.36750054	202.2500019
1	7511749	7513481	AT1G21460	0.8370769518000001	-	17	48.72000122	17.75800018	149.5440063
1	7518945	7521552	AT1G21480	1.7652005309999999	-	18	116.52500149999999	50.43224916	463.643243
1	7529704	7531108	AT1G21500	3.4556738210000004	-	1177	71.70999908	17.44799995	173.8259979
1	7554670	7557112	AT1G21560	0.02527564621	+	24	93.03499985	24.528500100000002	160.32500109999998
1	7557139	7565914	AT1G21580	0.15982595859999998	-	25	133.7299957	58.79799805	330.9959961
1	7566228	7570014	AT1G21590	1.1332163309999999	-	95	113.04000090000001	13.82850037	228.2260017
1	7570844	7573847	AT1G21600	0.0001892037197	-	122	88.68999863	11.46550012	171.5987488
1	7573829	7578963	AT1G21610	0.1390934434	+	24	138.27999880000002	48.071748299999996	274.6964912
1	7581007	7588153	AT1G21630	0.5667348699	+	78	99.27000046	25.45700045	251.770248
1	7588413	7592890	AT1G21640	0.34618920509999995	+	85	83.06999969	14.49500017	209.77399599999998
1	7592663	7604229	AT1G21650	1.326504262	-	16	106.88000109999999	51.38750029	266.3412399
1	7605619	7609223	AT1G21660	1.4200543780000001	+	42	127.1299973	19.67199917	256.66050490000003
1	7610240	7612721	AT1G21670	1.074043033	+	47	73.80000305	18.2	179.65200000000002
1	7612833	7615374	AT1G21680	0.37474829579999996	+	163	69.04000092	10.27849956	184.3094933
1	7615504	7618628	AT1G21690	0.3093359174	+	48	80.23500061	25.37875071	292.8340027
1	7620000	7624166	AT1G21700	0.7182286540999999	-	34	64.91999817	13.56050017	212.8677505
1	7624319	7626138	AT1G21710	0.7172500165000001	+	21	79.65000153	27.00499916	173.590004
1	7626181	7628290	AT1G21720	0.34806973420000004	+	146	67.28499985	10.44500017	187.27749630000002
1	7630106	7636658	AT1G21730	0.130495911	+	24	125.0750008	28.50950017	269.7772568
1	7645609	7648855	AT1G21750	0.07635832169	+	116	83.29000092	15.71000004	195.3037529
1	7649193	7651816	AT1G21760	0.197879909	+	74	62.25500107	15.47000017	216.49249500000002
1	7651645	7652288	AT1G21770	0.9601434797	-	153	66.79000092	13.9	209.7679993
1	7651881	7654014	AT1G21780	0.23712003920000002	+	65	78.91999817	13.3039999	266.97999269999997
1	7654087	7655981	AT1G21790	0.13389739	+	20	63.03999901	22.07224994	186.500499
1	7660946	7662725	AT1G21830	0.5246979653	-	289	86.41999817	21.7220005	219.4720001
1	7666413	7667794	AT1G21840	0.7494185993000001	+	27	121.3399963	40.40099955	237.88599700000003
1	7680389	7682641	AT1G21880	0.1209679419	+	40	83.03499985	25.46899939	220.9807537
1	7690801	7692459	AT1G21900	0.8836920997	-	72	64.03000069	17.44674954	141.92075419999998
1	7696426	7697831	AT1G21910	0.1217172542	+	28	70.63999939	16.03699934	116.478252
1	7704172	7706254	AT1G21920	1.891621354	-	169	104.36000059999999	19.33999939	228.0599945
1	7712818	7714459	AT1G21930	1.6556501209999999	+	63	78.75	18.55800009	156.45450290000002
1	7734660	7738772	AT1G21980	0.6406911292	+	62	101.0750008	24.83925076	171.4510017
1	7754280	7758029	AT1G22020	0.4411321378	+	29	78.5	23.80899982	194.3669937
1	7767923	7770216	AT1G22040	0.46185772869999997	+	20	84.43000031	15.75549986	139.37200090000002
1	7771658	7773154	AT1G22050	0.1271296311	+	28	73.77499771	17.54399981	150.831749
1	7773062	7781539	AT1G22060	0.05486016352000001	-	32	96.75499725	18.71600039	228.9659981
1	7789132	7792139	AT1G22070	0.04812366703	+	57	91.83000183	11.55000019	262.9119934
1	7814662	7815722	AT1G22140	0.11577776029999999	-	158	64.72000122	12.58774986	183.12599369999998
1	7823065	7823971	AT1G22160	1.064221252	+	56	55.00499916	14.79124999	215.2262478
1	7835780	7837411	AT1G22190	0.9620616345	+	74	101.65999980000001	37.25324883	194.7940033
1	7837562	7840898	AT1G22200	0.44444629	-	61	72.04000092	14.13999987	204.2350006
1	7858863	7859766	AT1G22250	0.0007302260328999999	+	15	84.25	20.23500061	175.2700073
1	7865434	7866176	AT1G22270	0.10020709380000001	+	162	59.09500122	16.68350005	140.5657429
1	7873866	7876018	AT1G22280	0.8829792987999999	+	65	65.95999908	15.99200058	193.7040039
1	7878758	7881395	AT1G22300	0.462106936	-	359	71.48000336	15.92950029	185.4274986
1	7886322	7889534	AT1G22330	1.001448018	+	24	84.02500153	18.61374993	170.10199430000003
1	7894806	7897761	AT1G22360	0.6773680065000001	-	40	74.66500092	19.25575023	117.51800159999998
1	7897914	7900335	AT1G22370	0.1250539209	-	27	76.90000153	12.10400002	272.4720055
1	7903659	7906969	AT1G22400	1.0651119709999999	-	19	84.44999695	13.6454999	218.90450130000002
1	7911842	7915004	AT1G22410	0.11047327050000001	+	204	61.67499924	14.49674962	166.0187435
1	7919076	7921893	AT1G22430	0.3319487592	+	101	133.4400024	12.5999999	270.19500730000004
1	7925120	7927345	AT1G22450	1.7798479740000002	+	181	73.04000092	14.875	206.59500119999998
1	7949475	7950900	AT1G22500	1.4152339859999998	+	26	77.42499924	27.68249965	131.1825027
1	7950817	7952832	AT1G22510	0.1872045818	-	20	76.45500183	15.70224967	142.0807507
1	7952973	7954546	AT1G22520	1.967530141	-	75	76.95999908	17.31399984	147.9519936
1	7955444	7958564	AT1G22530	0.8437886228	-	136	65.38500214	12.83750033	192.0387459
1	7963812	7966436	AT1G22540	0.1643211875	+	14	84.78999901	43.38149967	154.40050159999998
1	7966499	7968692	AT1G22550	1.81958183	-	14	90.02999878	50.60224924	172.2970001
1	7976423	7978810	AT1G22570	0.23354483210000002	-	19	77.08000183	28.76099987	141.4474968
1	7981721	7984334	AT1G22590	0.7234849354999999	+	61	59.63000107	11.75	185.5149994
1	7994165	8002989	AT1G22620	0.3060658123	-	24	94.90499878	28.67400131	175.9314972
1	7994261	7997588	AT1G22610	0.10712798050000001	+	63	73.59999847	14.54599977	124.6165009
1	8003222	8004304	AT1G22630	1.01951025	+	213	74.56999969	11.09499989	197.2169937
1	8006063	8007465	AT1G22640	4.303260797	+	214	93.93500137	18.12350011	237.07500109999998
1	8013352	8016150	AT1G22650	0.2300645841	-	12	76.85499954	18.40850043	159.5517517
1	8017280	8021930	AT1G22660	0.005563013902	+	12	113.31000139999999	34.14150047	191.1007469
1	8027125	8028168	AT1G22690	2.509430241	+	373	47.41999817	14.75899992	167.88400269999997
1	8028157	8030136	AT1G22700	0.3059548253	-	224	85.625	17.04149976	208.24149930000002
1	8030586	8033156	AT1G22710	0.1667093513	-	247	64.16999817	13.86800003	174.7149948
1	8046072	8049039	AT1G22730	0.8836765097	+	34	95.21500015	30.60325022	150.88374480000002
1	8049089	8050784	AT1G22740	0.3055937647	+	32	98.31999969	28.935999300000002	248.3490067
1	8050769	8052930	AT1G22750	0.6083151757999999	+	127	85.48000336	15.68199997	292.51100160000004
1	8061750	8067790	AT1G22770	1.3155372779999999	+	27	88.73000336	23.85950041	161.4240044
1	8067863	8069356	AT1G22780	0.7234282320000001	+	511	65.0	13.71500015	169.7124977
1	8069376	8071593	AT1G22790	0.8427281786	+	46	66.96500015	21.93250084	188.7662506
1	8071788	8074357	AT1G22800	0.157290566	+	25	99.04000092	21.39000053	216.1880035
1	8071788	8075020	AT1G05767	0.1396156643	+	25	99.04000092	21.39000053	216.1880035
1	8079286	8080574	AT1G22840	0.1935576332	+	286	66.33000183	20.30750084	177.0087566
1	8080481	8082882	AT1G22850	0.2242703891	-	317	69.16000366	14.549999900000001	185.7479996
1	8089266	8094505	AT1G22870	1.1546368040000001	+	16	136.2900009	29.26624942	235.1612511
1	8098391	8101464	AT1G22882	0.10641512310000001	+	19	56.63000107	19.50550013	189.81349980000002
1	8101423	8102500	AT1G22885	0.3468725003	+	103	76.04000092	24.07350035	174.4695007
1	8102727	8103588	AT1G22890	0.6458840901	+	81	63.68999863	16.62000084	162.32000730000001
1	8103611	8104605	AT1G22900	0.8850066472	-	11	70.55000305	19.89000034	192.09500500000001
1	8104992	8108361	AT1G22910	0.3464692729	+	55	90.79000092	23.21850033	187.72849580000002
1	8109573	8112061	AT1G22920	0.5761243407	-	63	85.02999878	24.79349957	176.1140045
1	8117285	8122151	AT1G22930	0.2836406256	+	86	97.58000183	17.87624955	193.94750019999998
1	8122338	8125068	AT1G22940	0.5508437959	+	35	109.8399963	31.47150049	211.0860031
1	8125022	8127286	AT1G22950	0.057453391029999995	-	21	100.44000240000001	22.73500061	182.5749969
1	8130597	8132435	AT1G22970	0.06409021963	-	44	81.97499847	21.99175081	216.8502449
1	8135179	8136034	AT1G22985	0.1851439735	-	19	68.73999786	9.941000032	98.70249634
1	8149867	8153796	AT1G23020	0.23776812519999999	-	28	120.2250023	22.33074968	359.57950669999997
1	8156503	8159185	AT1G23030	0.05378060417	+	48	104.75	26.2480001	172.14575159999998
1	8164781	8166716	AT1G23040	0.6278229799	+	39	49.20999908	13.34049983	122.84449769999999
1	8168442	8169267	AT1G23052	0.4334926982	-	136	67.52500153	19.46624947	156.3812523
1	8180188	8183650	AT1G23080	4.078252303999999	-	332	105.3250008	22.57599998	222.8697437
1	8184924	8189234	AT1G23090	0.36716030130000005	-	12	117.31499860000001	31.22124982	205.2617531
1	8195775	8196475	AT1G23100	0.14240180460000001	+	37	67.16999817	25.19000034	165.13800049999998
1	8198585	8199616	AT1G23120	0.07677875201	+	16	58.10000038	17.15750003	144.91875269999997
1	8200320	8201246	AT1G23130	1.025180189	+	1497	63.93999863	26.54600029	159.4620056
1	8215720	8219641	AT1G23180	0.0037550161100000003	+	25	104.20999909999999	23.95599937	229.2139954
1	8219807	8224547	AT1G23190	0.9168516540999999	+	118	88.11999893	15.30725033	235.79549869999997
1	8233952	8235019	AT1G23205	0.16102654130000002	-	19	40.45999908	10.11849992	85.50550308
1	8242368	8244403	AT1G23220	0.5889594998	+	75	63.58000183	13.774999900000001	167.10299530000003
1	8244417	8251937	AT1G23230	0.1705232411	+	12	111.79000090000001	26.58524981	157.13450469999998
1	8256853	8258725	AT1G23260	0.04590818476	-	111	76.41000366	13.33000016	205.08500669999998
1	8260607	8262795	AT1G23280	0.2276343715	-	68	82.08499908	11.87024999	218.6177471
1	8262924	8263739	AT1G23290	2.291318667	+	1112	56.24499893	14.41100008	154.51775049999998
1	8268384	8272021	AT1G23310	4.941915842	-	3901	69.62999725	14.72000027	228.909996
1	8279553	8282421	AT1G23330	0.2535846714	-	25	73.0	21.22400017	202.0440063
1	8283643	8286969	AT1G23340	0.20480244329999997	-	20	89.91500092	22.14300008	169.5842487
1	8295077	8296941	AT1G23360	0.02317967492	-	39	137.13000490000002	28.36600018	295.93298799999997
1	8297240	8302651	AT1G23380	0.3595134699	-	12	104.8999977	51.93599939	176.7577435
1	8308964	8310916	AT1G23390	1.791872142	-	712	71.3350029	16.35524945	158.6982471
1	8311983	8315876	AT1G23400	0.6835650506000001	-	75	89.16999817	15.92850027	213.8334969
1	8314852	8315737	AT1G23410	0.2042832338	+	17	60.75999832	13.71800003	178.0819977
1	8321610	8324497	AT1G23440	0.08528990627000001	+	88	73.16999817	19.02124939	218.098502
1	8326746	8329782	AT1G23460	0.458270884	+	16	57.68000031	19.47499967	214.7412491
1	8332861	8336414	AT1G23480	0.420645526	+	45	114.29000090000001	18.21200085	218.2189957
1	8336592	8338827	AT1G23490	2.092548311	+	618	71.56999969	18.65974984	196.0632504
1	8385187	8386522	AT1G23710	1.177568485	+	58	80.67000198	13.45349977	153.73174740000002
1	8398114	8399836	AT1G23740	1.088427756	-	523	67.23000336	12.08299994	196.57600630000002
1	8400055	8401550	AT1G23750	0.290930164	+	35	70.26999664	21.30600047	170.6624969
1	8406662	8408530	AT1G23780	0.904762427	-	67	60.61999893	15.08599963	136.2690002
1	8412050	8414886	AT1G23800	0.30166944170000004	-	17	61.0	15.34400024	211.43199769999998
1	8420264	8422985	AT1G23820	0.5122964233	+	180	71.88499832	16.20075016	236.4395
1	8427256	8429498	AT1G23860	1.125821137	-	100	54.72999954	11.69800024	175.88125
1	8432178	8435656	AT1G23870	0.5783284125	+	67	88.43000031	20.62200003	178.3495018
1	8438765	8440866	AT1G23890	0.3025498625	-	22	66.05999756	20.81775029	146.47975309999998
1	8441072	8447681	AT1G23900	0.2006522261	+	43	127.8799973	44.85250034	254.99198990000002
1	8469532	8471417	AT1G23950	0.367315502	-	58	101.6800003	22.66299949	256.3372505
1	8478390	8480356	AT1G23960	0.9574150140000001	-	115	82.48000336	15.77799973	218.7279938
1	8481996	8483875	AT1G23970	0.8679887803	-	25	99.13999939	19.63399963	274.3399994
1	8484702	8486002	AT1G23980	0.18817659239999998	-	12	85.07999802	16.52975011	200.05324819999998
1	8500118	8502065	AT1G24020	0.055179955829999995	-	117	57.93000031	14.048999599999998	155.398999
1	8503776	8506813	AT1G24040	0.07998850613	-	45	111.3099976	17.26600056	196.33399509999998
1	8506967	8508909	AT1G24050	0.35454965299999996	+	128	79.75999832	19.65099955	230.83699610000002
1	8525333	8527087	AT1G24100	0.3498810513	-	103	63.88000107	14.13250003	187.61550219999998
1	8529063	8532262	AT1G24120	1.015986279	-	40	116.4099998	20.17475042	221.1774944
1	8540837	8542053	AT1G24145	1.10548991	+	31	78.93000031	25.22000027	175.9624977
1	8542211	8543545	AT1G24147	0.1292285342	+	62	54.25500107	8.637000167	177.9697506
1	8544247	8545590	AT1G24148	1.513460262	+	132	88.00999832	16.1180006	170.28475269999998
1	8553312	8556750	AT1G24160	0.8734298187999999	-	106	98.81999969	15.79374945	207.9850044
1	8557214	8559066	AT1G24170	0.14662876	-	26	71.08000183	14.236249800000001	184.33875659999998
1	8560419	8563502	AT1G24180	0.2848234542	-	69	82.84999847	23.19699993	204.96599880000002
1	8563509	8570580	AT1G24190	0.4238959991	-	23	111.20999909999999	18.89799967	213.0689957
1	8586334	8588180	AT1G24240	0.6429156053	+	34	100.16500090000001	17.95449924	183.8484947
1	8604021	8607484	AT1G24267	0.4346134493	-	61	102.29000090000001	26.20499992	213.25
1	8614362	8620664	AT1G24300	0.2324079743	-	21	102.0	9.409999847	199.33999630000002
1	8624013	8626405	AT1G24310	0.43572259799999996	+	45	111.5599976	16.42699986	243.44999539999998
1	8635186	8638986	AT1G24340	0.1756880175	+	23	89.06999969	31.947500899999998	292.9505005
1	8638519	8640825	AT1G24350	0.19080884239999998	-	45	92.61000061	16.10099983	185.06199650000002
1	8640581	8643503	AT1G24360	0.06399623382	+	265	75.73999786	12.67200012	223.93200380000002
1	8651406	8653915	AT1G24400	0.058335018020000004	-	16	110.6049995	41.16250038	202.8100033
1	8661837	8664007	AT1G24440	0.27711550890000003	+	49	101.48000340000002	20.06199989	233.1279938
1	8664096	8665569	AT1G24450	0.1927103515	+	39	80.36000061	17.96700034	163.12349550000002
1	8665873	8672651	AT1G24460	1.393345738	+	25	105.59999850000001	29.98599968	203.6720001
1	8682194	8685271	AT1G24490	0.043697060360000005	+	62	93.53499985	17.62274952	299.5379974
1	8685270	8688247	AT1G24510	1.544873126	-	234	80.20999908	14.52749989	216.6447472
1	8693226	8694705	AT1G24530	1.363733249	+	20	49.60000038	13.79449995	121.67924540000001
1	8702360	8705879	AT1G24560	0.9377295070999999	+	39	97.30999756	21.32700024	281.55150299999997
1	8710846	8711578	AT1G24575	0.1094948561	-	17	70.69999695	18.22399998	122.4699982
1	8712477	8713225	AT1G24577	0.2371932793	-	16	64.79000092	15.09874988	115.8262501
1	8720650	8722825	AT1G24610	0.3304507986	-	43	85.08000183	35.64650116	166.38050159999997
1	8725788	8727212	AT1G24625	0.3369340831	-	52	80.54500198	12.39874997	136.45450549999998
1	8741835	8755604	AT1G24706	0.031045490630000002	+	21	111.66999820000001	45.33500099	199.3850021
1	8759532	8763469	AT1G24764	0.08737573085000001	-	39	68.02999878	14.43949962	194.1804985
1	8767561	8769571	AT1G24793	0.7890659322	+	54	166.5550003	38.59300127	339.5262405
1	8769510	8771553	AT1G24800	0.03007927756	+	217	63.36000061	15.953999900000001	184.9160004
1	8775900	8778072	AT1G24880	1.571020424	+	761	196.5200043	22.52000046	372.5899963
1	8784035	8785634	AT1G24881	0.03750193467	+	222	63.38000107	16.03024986	183.14599990000002
1	8804488	8806361	AT1G25054	0.727728629	+	55	167.08000180000002	38.81400127	347.99248660000006
1	8806606	8808156	AT1G25055	0.03750193467	+	222	63.38000107	16.03024986	183.14599990000002
1	8812694	8815264	AT1G25098	1.480289657	+	725	193.9400024	31.77199955	372.2879974
1	8818866	8820736	AT1G25145	0.727728629	+	55	167.08000180000002	38.81400127	347.99248660000006
1	8821007	8822843	AT1G25150	0.038431923	+	217	63.36000061	15.953999900000001	184.9160004
1	8826982	8829682	AT1G25175	1.23140931	+	578	192.2450027	31.63275032	367.81050110000007
1	8833244	8835235	AT1G25210	0.727728629	+	55	167.08000180000002	38.81400127	347.99248660000006
1	8835385	8837007	AT1G25211	0.04448594057	+	221	63.36000061	16.01499987	183.5
1	8836834	8839609	AT1G25220	1.071027833	-	39	96.45999908	19.27649956	226.90049359999998
1	8840202	8842445	AT1G25230	2.460518703	-	108	98.53499985	17.31424947	240.0850006
1	8853533	8855874	AT1G25260	0.2875204971	-	179	80.77999878	14.36999979	226.5659966
1	8860526	8861522	AT1G25275	6.777664023	+	479	83.51999664	15.94900002	196.3289948
1	8863767	8866894	AT1G25280	1.031220086	+	66	86.09999847	16.01625001	174.8887463
1	8867023	8869289	AT1G25290	0.1545639771	+	24	97.0	20.52850022	152.84025380000003
1	8889017	8894306	AT1G25350	1.4312876190000001	-	78	92.65999985	22.92774999	234.57424890000001
1	8900109	8903428	AT1G25375	0.07450135557	-	13	110.08000179999999	23.41400051	210.66900479999998
1	8903404	8906455	AT1G25380	0.07711820183	+	35	117.91999820000001	40.9654994	228.73950269999997
1	8906028	8909334	AT1G25390	0.6579548968	-	21	70.11000061	20.91499996	147.16999819999998
1	8911095	8912822	AT1G25400	1.060511027	-	13	85.83000183	47.634998700000004	112.15399779999998
1	8915914	8918267	AT1G25420	0.02981031765	+	73	93.22000122	15.53000011	208.3279999
1	8922415	8923879	AT1G25425	0.5168621801	+	32	61.55000114	18.62649951	133.7930058
1	8933715	8935544	AT1G25440	0.2217004032	-	216	75.63999939	11.97875011	196.49249650000002
1	8938386	8940613	AT1G25450	0.5533491064	-	36	76.38499832	16.98999965	180.8937454
1	8944608	8946628	AT1G25470	0.10147549130000001	-	21	83.70999908	42.99500084	223.7200012
1	8948231	8951031	AT1G25480	0.6206492587	+	15	120.6100006	44.53750076	188.9745026
1	8951161	8955160	AT1G25490	0.062067773220000004	+	122	87.56000137	15.54050002	248.6982548
1	8962086	8964564	AT1G25520	1.31958911	+	38	80.93499756	12.88550031	205.96725159999997
1	8964543	8967562	AT1G25530	0.2822215621	-	11	86.16000366	35.78500175	254.3524895
1	8969064	8974815	AT1G25540	0.4819435412	-	38	101.4449997	23.76724949	190.7642536
1	8976325	8978305	AT1G25550	0.587038496	+	242	102.4249992	12.24125004	225.60924530000003
1	8981555	8983314	AT1G25560	0.6940126811	-	582	76.04000092	13.26674988	171.0080021
1	8991707	8995617	AT1G25570	0.01145392466	-	33	112.6900024	20.00800056	271.8560059
1	8996713	8999917	AT1G25580	0.3902350575	-	23	76.34999847	12.99449973	131.6730003
1	9002284	9004762	AT1G25682	0.4692347081	-	64	80.54999924	10.27099988	235.71549610000002
1	9020379	9022769	AT1G26090	0.14840380279999998	+	18	114.6749992	40.4412499	270.5759941
1	9022541	9024081	AT1G26100	0.8526670089	-	16	117.125	45.047498700000006	236.1075096
1	9024340	9027955	AT1G26110	0.6480954708	-	186	83.04000092	16.02875006	201.02625659999998
1	9028375	9032327	AT1G26120	1.074654825	-	33	82.69000244	19.88800049	192.6119965
1	9033015	9039099	AT1G26130	1.0817864320000001	+	13	94.02999878	40.67600174	190.0919968
1	9039627	9043855	AT1G26150	0.6191205847	-	52	155.5249939	39.65975084	291.6702538
1	9044421	9047049	AT1G26160	0.4638009948	-	38	82.27999878	17.82774987	264.99550780000004
1	9047291	9054703	AT1G26170	0.05439848864	-	26	136.840004	32.05124974	379.605011
1	9054672	9056941	AT1G26180	0.2054756244	+	35	115.3000031	25.94350014	278.589502
1	9057094	9061140	AT1G26190	0.8952824074	-	11	137.3099976	35.02250051	181.68499369999998
1	9065954	9071468	AT1G26208	0.5687112689	-	29	146.5200043	47.23999977	247.8870071
1	9067038	9068207	AT1G26210	0.0195851823	+	49	72.11000061	8.434000015	134.22200619999998
1	9071057	9072273	AT1G26218	1.254827122	-	17	100.1200027	21.24199963	173.5039978
1	9071139	9071861	AT1G26220	0.8980116615000001	+	54	69.99000168	14.50574999	150.97975119999998
1	9072255	9075350	AT1G26230	0.7617683519	-	23	129.7400055	22.60249996	280.639994
1	9089468	9092560	AT1G26270	0.2871245232	-	84	69.12000275	14.33799958	144.1592453
1	9095767	9099766	AT1G26300	0.021243330930000002	-	39	82.51999664	21.20500045	194.4480003
1	9113863	9114977	AT1G26340	0.1715523676	+	42	70.68000031	14.74725027	180.1425022
1	9121442	9125578	AT1G26370	0.05284220335	-	18	85.69499969	17.24449995	271.2574974
1	9148635	9150250	AT1G26450	1.613915281	-	14	72.66999817	19.62624996	161.2805004
1	9151627	9154762	AT1G26460	0.6775619359	+	52	78.59000015	31.79725089	246.5380043
1	9155090	9156370	AT1G26470	0.22316613300000002	+	76	95.32500076	16.75250006	193.66750530000002
1	9171117	9173033	AT1G26550	0.17039601640000002	+	233	51.41999817	12.32599964	173.28799740000002
1	9178211	9181967	AT1G26560	0.7721715637000001	+	67	83.62000275	7.37699995	222.3144974
1	9182007	9184393	AT1G26570	0.044771674819999996	+	13	52.81999969	26.51499996	116.2490013
1	9184566	9187578	AT1G26580	0.1966455621	+	82	137.7300034	26.82600021	326.405249
1	9195511	9199671	AT1G26620	0.2753076658	-	18	82.11000061	41.39449902	127.09999750000001
1	9205799	9207417	AT1G26630	2.837604489	+	2175	59.66999817	12.99150009	180.05950239999999
1	9207382	9209902	AT1G26640	1.116273868	-	41	69.0	13.14999962	218.35000609999997
1	9210050	9211588	AT1G26650	1.080001442	+	59	67.08000183	15.28800015	156.2460007
1	9214071	9215557	AT1G26665	0.2938914814	+	25	73.62000275	20.57199974	236.2399994
1	9215769	9218010	AT1G26670	1.873965857	+	173	65.76999664	12.34400005	172.96499330000003
1	9224058	9225792	AT1G26690	0.2333226653	-	37	59.59000015	19.33200083	161.5949997
1	9244980	9246652	AT1G26740	0.8553805512999999	-	46	55.13000107	11.44749999	230.2037506
1	9246856	9248274	AT1G26750	0.8775007609000001	+	42	96.98999786	24.24549975	250.06074980000002
1	9250040	9251659	AT1G26761	0.1348617625	-	81	52.59999847	13.85000038	221.32000730000004
1	9259431	9261313	AT1G26770	0.26523682120000003	+	69	88.97000122	22.52900009	269.26099239999996
1	9285024	9286395	AT1G26800	0.13475443410000001	-	77	68.70999908	19.16699924	173.0779938
1	9292445	9293862	AT1G26820	0.002033060666	-	13	90.48000336	26.82499981	157.26499630000004
1	9295564	9298629	AT1G26830	0.34051882689999996	+	63	58.11999893	14.23550005	183.13500439999999
1	9300805	9304328	AT1G26850	0.1642490435	-	286	77.27000046	19.47749925	216.7074986
1	9315304	9318277	AT1G26880	0.351356062	-	461	62.34999847	12.67500019	169.5400009
1	9321649	9323028	AT1G26910	0.346401135	+	42	63.08500099	13.81225019	133.71500659999998
1	9329492	9330612	AT1G26920	0.7677792612000001	+	198	68.5	22.38449993	148.78300019999998
1	9336056	9337938	AT1G26930	0.10449024400000001	-	21	70.37999725	20.67999983	181.7450027
1	9343111	9345323	AT1G26940	0.4472477939	+	28	80.04499817	24.43750024	229.5727444
1	9351159	9352833	AT1G26945	0.006361092423	+	346	64.24499893	14.25625038	179.8000011
1	9373884	9376828	AT1G27000	0.1834021343	+	140	72.59999847	14.90375016	188.7237499
1	9381526	9384060	AT1G27030	1.998619085	+	15	161.1499939	21.93249969	236.0515045
1	9393652	9394716	AT1G27050	0.9031302955	+	37	60.59999847	9.141000175	133.71199950000002
1	9396657	9399500	AT1G27070	0.1508794933	-	25	118.4800034	21.18200035	193.54600219999998
1	9403752	9406369	AT1G27090	0.25711761850000003	-	255	66.91000366	20.25700006	167.3384949
1	9407084	9411368	AT1G27100	1.391902108	-	141	80.04000092	13.39499998	185.1650009
1	9421008	9424084	AT1G27120	1.268945789	+	30	76.49499893	19.90524993	167.6154999
1	9425279	9426897	AT1G27130	0.05730577522000001	+	191	54.79000092	15.74250007	147.36749650000002
1	9429007	9432310	AT1G27150	1.299072537	+	47	113.4100037	18.86799984	194.9809998
1	9446596	9449046	AT1G27190	0.1513688994	-	116	73.30500031	19.05249953	167.4187489
1	9449337	9451768	AT1G27200	0.6592278558	-	36	82.11000061	18.37999916	136.322506
1	9455276	9458176	AT1G27210	0.08555889441	-	84	90.29000092	16.5462492	174.9175064
1	9481404	9482992	AT1G27290	0.4520458311	+	321	97.22000122	16.87000084	197.8099976
1	9483156	9484368	AT1G27300	1.158116492	+	53	74.16000366	17.40900059	139.9070038
1	9484315	9486002	AT1G27310	0.1974556345	-	269	54.74000168	17.35500021	146.1689987
1	9486888	9492632	AT1G27320	0.6117152075	+	92	79.3599968	16.69150038	249.552504
1	9492848	9494382	AT1G27330	0.08258791908	+	128	67.47000122	12.25024996	181.14249990000002
1	9495343	9498085	AT1G27340	0.2936516348	+	69	84.16999817	20.60599995	224.240007
1	9497999	9499639	AT1G27350	0.756721465	-	208	63.39500046	13.81375015	179.0667461
1	9505111	9508542	AT1G27370	1.194312167	-	13	173.67999269999999	122.26700290000001	238.663002
1	9510474	9512971	AT1G27385	0.6596670883	-	99	77.33000183	17.35149946	206.811998
1	9513080	9515050	AT1G27390	0.5597987374	-	103	70.12000275	14.82649989	200.6490021
1	9515113	9517070	AT1G27400	0.2334873868	+	567	83.08000183	16.26799974	209.6570061
1	9517200	9519025	AT1G27410	0.04350662322	+	11	98.51999664	27.81750011	199.517498
1	9520824	9527280	AT1G27430	0.029919581299999998	-	27	125.8700027	46.83849926	283.0985001
1	9527500	9528878	AT1G27435	0.3238781591	-	143	61.72000122	17.35849934	150.4459991
1	9531808	9534141	AT1G27450	1.399696971	+	297	65.11000061	13.18400021	204.2400055
1	9534487	9537614	AT1G27460	1.02017213	+	42	92.35499954	36.43674898	163.8232536
1	9540048	9544303	AT1G27470	0.400150991	-	29	100.80999759999999	13.85200062	217.95199580000002
1	9544409	9546285	AT1G27480	0.22263480559999999	+	62	51.98999977	10.22525017	157.3937496
1	9554709	9558461	AT1G27510	0.04117251786	-	55	98.91999817	16.26800017	215.531498
1	9558561	9562485	AT1G27520	0.5012846656000001	+	27	181.1900024	35.85950003	389.2755142
1	9562486	9564031	AT1G27530	0.4283625611	-	134	64.31000137	18.14300017	160.5182514
1	9565912	9567906	AT1G27540	0.1201071225	-	80	65.05500031	16.07674978	194.0872524
1	9574549	9575189	AT1G27565	0.3215282634	+	58	89.39500046	25.89249973	174.3374996
1	9592087	9602917	AT1G27595	0.09836873705	+	27	113.8899994	27.77399998	321.6084991
1	9603177	9606247	AT1G27600	0.34311658170000003	-	56	87.80500031	24.22375059	216.9725018
1	9611052	9614336	AT1G27630	0.3585743139	+	31	142.1900024	24.84250069	493.66000369999995
1	9614550	9616357	AT1G27650	1.0598518259999998	+	167	69.65000153	13.705999800000003	145.33200530000002
1	9631189	9634597	AT1G27680	0.050658860949999995	+	12	134.6900024	45.08274994	220.78099590000002
1	9636587	9638901	AT1G27690	0.2366628283	+	22	83.71500015	14.59324956	218.38049130000002
1	9639023	9640204	AT1G27695	0.6238224379	+	73	60.29999924	21.01000061	172.0459961
1	9639858	9641902	AT1G27700	0.3177135023	-	25	101.6500015	24.24600029	204.9459991
1	9648020	9649323	AT1G27730	0.06779902691	-	28	66.48500061	12.42949994	147.66999819999998
1	9657172	9661994	AT1G27750	0.07618627365	+	17	97.69999695	41.43799896	314.0179932
1	9662020	9667550	AT1G27752	1.024949254	+	34	101.4149971	24.25149965	179.7614937
1	9668507	9671657	AT1G27760	0.127089946	+	100	96.27500153	19.11825023	275.2445038
1	9671631	9676307	AT1G27770	0.32586183890000003	-	44	106.8400002	26.85950079	258.1579891
1	9698297	9703944	AT1G27850	0.11593351810000001	+	38	95.58499908	36.23950119	233.151503
1	9715341	9720629	AT1G27900	0.1519351326	-	17	83.66999817	21.72599964	252.8120056
1	9720732	9724800	AT1G27910	0.01866149977	-	14	91.69500351	17.87200005	137.9619953
1	9730958	9733000	AT1G27930	0.7073353137	-	109	68.06999969	17.12100019	212.9839951
1	9740507	9742159	AT1G27950	2.462456237	+	786	44.81499863	11.10874975	149.5324974
1	9746708	9748467	AT1G27970	1.142071616	+	263	63.41999817	15.32399969	171.61100080000003
1	9748505	9752769	AT1G27980	0.7526733573000001	+	15	120.8899994	63.63849983	204.4880035
1	9763210	9768113	AT1G28010	0.17268092629999998	+	16	82.45500183	20.83749914	156.64250180000002
1	9778850	9782907	AT1G28060	0.010010122840000002	+	50	85.83000183	18.70524998	169.0799969
1	9782846	9784091	AT1G28070	0.222827375	+	20	80.84500122	22.14524989	151.8684994
1	9795717	9799116	AT1G28090	0.6466989746	+	16	125.579998	44.63249969	239.4362507
1	9801081	9804394	AT1G28100	0.014096000480000002	+	27	109.41999820000001	26.14849982	271.311499
1	9803640	9806899	AT1G28110	1.01112444	-	25	57.45000076	15.91200027	132.8339981
1	9812929	9815560	AT1G28120	1.0112214259999999	-	79	76.55000305	13.91400003	196.02199480000002
1	9825168	9828118	AT1G28130	0.3742486008	+	43	78.70999908	13.81200023	222.61949390000004
1	9831875	9834510	AT1G28140	0.36823202909999997	-	141	79.81999969	16.2699995	226.5
1	9834641	9836210	AT1G28150	0.1951490337	-	159	67.27999878	18.01099997	163.7855019
1	9849843	9852449	AT1G28200	0.41954464350000004	-	75	67.84999847	13.35450029	189.6169975
1	9862040	9864779	AT1G28230	0.4304330682	-	17	77.63999939	15.14400005	167.7920013
1	9868256	9872278	AT1G28240	0.3027051105	-	26	117.11999890000001	33.36749983	239.32750319999997
1	9874246	9875579	AT1G28250	0.06747180912999999	+	63	61.08000183	10.39850001	155.7694977
1	9875526	9879433	AT1G28260	0.053815905379999994	-	25	93.44000244	23.74599915	176.8439972
1	9885399	9887478	AT1G28280	1.680928605	-	88	82.65499878	19.85274978	194.999501
1	9889100	9891015	AT1G28290	0.2229316885	-	192	59.29500008	14.06174991	173.72224880000002
1	9912202	9913837	AT1G28310	1.091136485	-	23	93.44000244	30.853499699999997	212.785006
1	9920218	9924488	AT1G28320	0.8071009098999999	-	45	108.08000179999999	27.239999199999996	289.61400150000003
1	9933785	9935440	AT1G28330	6.860080243	-	513	96.65000153	15.57600021	205.1240051
1	9939960	9943616	AT1G28340	0.2804925921	+	71	93.41000366	28.99249983	226.81999590000004
1	9943736	9949835	AT1G28350	1.024931072	+	20	114.86999890000001	19.9724998	259.0832516
1	9963447	9966320	AT1G28380	0.49945946700000005	+	45	68.72000122	20.05400047	193.0809998
1	9969245	9971681	AT1G28395	0.002553148078	-	70	77.22999954	19.71474981	179.77475090000002
1	9972184	9973942	AT1G28400	0.3115242185	-	112	44.5	13.77149994	149.6044994
1	9976181	9979793	AT1G28410	0.08268519053	-	28	86.23500061	14.85800035	273.92625239999995
1	9979477	9987737	AT1G28420	0.1483945107	+	29	95.12000275	28.70999975	251.9370026
1	9996712	10000455	AT1G28440	0.7717742714	+	91	72.26000214	15.52000046	153.5399971
1	10015855	10018047	AT1G28490	0.8272690212	+	55	78.56999969	19.50999937	226.93399730000002
1	10023816	10026311	AT1G28510	0.6960403197	+	44	75.5	21.86674972	139.09025
1	10029082	10031990	AT1G28520	0.001784240988	+	55	98.06999969	20.48200006	211.1219978
1	10031984	10035638	AT1G28530	0.5803963645	-	12	123.6399994	59.668501	179.0352474
1	10035616	10037403	AT1G28540	0.3720330935	+	41	80.83999634	13.17000008	150.86999509999998
1	10044336	10046552	AT1G28580	0.1167592734	-	63	62.20999908	14.79550009	272.7874954
1	10050956	10053218	AT1G28600	0.5138803321000001	-	70	83.60499954	20.78175073	247.8962517
1	10053442	10055881	AT1G28610	0.0317534007	-	20	116.6350021	32.12900109	260.3787426
1	10071608	10073549	AT1G28660	0.05533394196000001	-	23	61.47999954	26.73050032	152.72549740000002
1	10074358	10076457	AT1G28670	0.9339260587	-	66	84.77000046	23.73624969	158.1312466
1	10078188	10079909	AT1G28680	0.3774411633	+	41	85.09999847	19.95999908	172.88000490000002
1	10086365	10089772	AT1G28710	0.3493053139	-	14	93.73500061	26.47299929	347.3717575
1	10109499	10111738	AT1G28960	0.49673295990000005	-	61	114.1999969	26.13500023	270.2600021
1	10133982	10136124	AT1G29040	0.9516657306	+	61	88.81999969	18.73500013	192.1399994
1	10136245	10139228	AT1G29050	0.42040548899999997	-	27	93.66999817	17.65800018	162.9259949
1	10147604	10149780	AT1G29060	0.4781377972	+	35	71.18000031	12.36649995	163.14700390000002
1	10149790	10151407	AT1G29070	1.230853798	+	953	65.73000336	16.35200043	165.7040009
1	10174161	10178521	AT1G29120	0.18437374010000002	+	75	96.04000092	25.62550039	260.4809952
1	10180301	10182808	AT1G29150	1.076919803	+	221	65.45999908	13.07499981	188.02999880000002
1	10190136	10195213	AT1G29170	0.1203960826	-	11	114.75	35.36250114	229.6650009
1	10210519	10212722	AT1G29220	0.1742984863	-	33	77.61000061	21.44400024	240.8360046
1	10223265	10224799	AT1G29250	0.104272461	-	174	70.97000122	13.38524978	175.0910019
1	10224814	10226322	AT1G29260	0.8795711454	+	62	69.875	16.58474956	157.5562515
1	10236336	10237990	AT1G29280	0.04987590212	+	20	59.46500015	11.60999974	255.54800530000003
1	10252240	10254792	AT1G29310	0.46853456060000004	+	54	75.82500076	23.19099984	234.99674840000003
1	10255249	10258343	AT1G29320	0.0450483731	+	17	80.43000031	25.23399963	221.9280029
1	10258247	10261232	AT1G29330	0.5882914435000001	-	33	74.83000183	16.03200016	143.0720001
1	10264042	10266917	AT1G29340	0.7026134845	+	68	70.18000031	15.38799965	155.1522537
1	10268420	10273821	AT1G29350	0.7557322065000001	-	120	66.93000031	18.57899995	246.9092499
1	10273930	10275765	AT1G29357	1.4574985409999999	-	19	217.91999819999998	127.1974987	341.4720093
1	10277747	10283225	AT1G29370	0.6644268121	-	112	69.22000122	18.57100015	254.1832489
1	10286066	10288103	AT1G29390	1.22860992	-	130	87.49499893	14.99675007	207.2727516
1	10288128	10289666	AT1G29395	0.35571152	-	218	114.75	29.10324945	224.9949974
1	10289997	10294630	AT1G29400	1.8892961990000001	-	133	112.8199997	32.44599895	208.4970047
1	10297749	10300073	AT1G29410	1.58010869	-	13	169.02999880000002	82.52300262	277.3650024
1	10300877	10301302	AT1G29418	0.06286846703	+	94	76.92499924	19.02850013	215.1577457
1	10301376	10302099	AT1G29420	0.02676759611	-	19	47.31000137	19.17849965	155.37049869999998
1	10302584	10303418	AT1G29430	0.03582399712	-	134	66.32500076	13.13575027	124.634498
1	10304506	10305108	AT1G29440	0.049686951560000005	-	184	60.16500092	13.16699998	142.68474730000003
1	10305552	10306595	AT1G29450	0.05855843338	-	118	67.68500137	10.14175014	143.13574519999997
1	10307351	10308246	AT1G29460	0.1745991331	-	119	62.61000061	12.43399959	134.9934929
1	10308519	10309896	AT1G29465	0.4932140988	+	122	71.84499741	14.12124989	196.0192436
1	10310130	10314147	AT1G29470	0.19585025609999998	-	261	79.02999878	15.10500002	210.8349991
1	10321010	10321978	AT1G29500	0.23826902149999998	+	202	66.19499969	13.49399955	175.3437523
1	10322422	10323239	AT1G29510	0.06646091786000001	+	131	62.68999863	11.82000041	143.234993
1	10323635	10324826	AT1G29520	0.6553485227	+	26	86.38999939	18.63624978	193.8250046
1	10324744	10326848	AT1G29530	0.6443525784	-	36	74.93500137	11.32375002	199.8137474
1	10330424	10332326	AT1G29550	0.8826578536	+	25	80.97000122	17.89599953	192.98999630000003
1	10371674	10374005	AT1G29660	0.3179979169	+	417	66.66000366	15.75599995	210.2640015
1	10375598	10377871	AT1G29670	2.446084566	+	314	55.36500168	12.29349995	165.7625057
1	10379019	10382153	AT1G29690	0.08499875296	-	23	116.04000090000001	38.1590004	249.65299530000001
1	10384944	10387441	AT1G29700	1.469775909	-	137	73.23999786	13.84000015	212.8000031
1	10413852	10420774	AT1G29750	0.1877078763	-	11	105.2399979	33.64249897	162.7674942
1	10422291	10424513	AT1G29760	0.751348705	+	18	60.46500206	26.44849992	333.33525310000005
1	10426778	10429143	AT1G29785	0.19318653510000003	-	45	65.04000092	13.56700001	128.863002
1	10429717	10432123	AT1G29790	0.43366490189999995	+	33	67.06999969	14.13000011	150.7699951
1	10435373	10437558	AT1G29810	1.007950221	-	28	69.20999908	15.90549996	154.8322487
1	10437656	10440786	AT1G29820	0.3033445707	+	20	112.3049965	30.72124953	177.2237553
1	10445618	10447753	AT1G29840	0.8733196740000001	-	14	139.8350029	23.30599985	213.3552483
1	10447346	10449969	AT1G29850	0.28652911329999997	+	172	61.11999893	10.38225036	169.8697468
1	10459456	10462967	AT1G29880	0.3842251763	-	157	74.04000092	12.06200037	211.9739929
1	10463028	10467452	AT1G29890	1.854839186	+	48	70.03000259	11.25299993	204.46875269999998
1	10467955	10472211	AT1G29900	0.09149623726	+	138	80.18999863	24.26349988	209.71800580000001
1	10472279	10473502	AT1G29910	5.438973937999999	-	16617	54.04000092	12.67000008	148.876004
1	10474655	10475969	AT1G29920	2.721978272	-	16183	58.15000153	11.79550009	152.9749954
1	10477884	10479114	AT1G29930	76.00311318	+	40841	56.68999863	14.76000023	147.2700043
1	10479006	10486824	AT1G29940	0.6613460391	-	28	121.3649979	28.29700007	253.2224983
1	10491697	10494598	AT1G29950	0.4962441626	+	82	103.6899986	33.42724972	264.471756
1	10498309	10499462	AT1G29965	1.033599555	-	83	84.54000092	24.6390008	150.15000080000002
1	10498350	10501498	AT1G29970	1.290933084	-	172	81.65000153	20.66249971	161.1909931
1	10503238	10506189	AT1G29980	0.3444871711	-	21	64.36000061	32.19999981	156.9499969
1	10507532	10509151	AT1G29990	0.1809018296	+	118	68.26999664	16.9149992	159.9350071
1	10509155	10512558	AT1G30000	0.4168805385	-	30	69.98500061	13.54224958	186.75575030000002
1	10546510	10548236	AT1G30070	0.03892817027	-	53	64.08000183	11.20700035	165.6030014
1	10559495	10561545	AT1G30090	0.7728002847	-	43	84.76000214	19.95399942	234.2720055
1	10581734	10584152	AT1G30110	0.08928942038999998	+	14	81.95999908	16.03800025	176.57274669999998
1	10584104	10586680	AT1G30120	0.3814018715	-	332	60.04000092	11.81875	171.7979977
1	10587470	10590209	AT1G30130	0.2067378325	+	50	81.82500076	10.3957499	214.48325
1	10624999	10627135	AT1G30200	1.0355120820000001	+	46	98.95500183	15.93375003	252.5312386
1	10627184	10630630	AT1G30210	0.18539242179999998	-	85	89.23000336	18.76399994	234.6919983
1	10638877	10640941	AT1G30230	0.21109639989999998	+	1365	60.08000183	14.09299994	231.58099520000002
1	10650913	10651829	AT1G30260	0.1636014385	+	44	63.11000061	15.51399972	192.6427517
1	10654799	10658924	AT1G30270	0.015523780559999999	+	63	92.73999786	22.48449984	217.418502
1	10680078	10683137	AT1G30320	0.609228476	+	31	82.76000214	17.96749926	190.6624985
1	10685821	10690988	AT1G30330	0.06519068607999999	-	52	117.11999890000001	37.9242485	210.1707462
1	10715481	10718997	AT1G30360	1.916201775	+	296	77.52500153	15.05250013	204.8975048
1	10722182	10723247	AT1G30380	0.6572475479	+	8452	63.13500023	13.35999966	164.6935055
1	10727316	10738092	AT1G30400	0.015967831340000002	+	73	98.5	17.17000046	200.102005
1	10758742	10762429	AT1G30440	0.05630495906000001	+	76	73.84999847	15.6875	195.8862476
1	10762707	10769616	AT1G30450	0.11815156660000001	+	33	102.33000179999999	18.53600044	172.13200680000003
1	10770812	10775428	AT1G30460	0.09169624013000001	-	27	70.22000122	15.26999955	180.0550018
1	10779110	10786697	AT1G30470	0.2312732522	+	52	107.6150017	26.59649982	219.79199869999997
1	10790021	10792725	AT1G30480	0.2689724557	+	30	82.90000153	16.20000041	199.5057468
1	10796123	10801093	AT1G30490	1.8856848019999999	-	22	158.8249969	63.38674898	281.12000889999996
1	10804449	10806428	AT1G30500	0.03455608266	-	44	93.27999878	20.68699918	193.2737511
1	10806929	10809188	AT1G30510	0.3079813455	-	41	75.55999756	10.11999989	187.4400024
1	10810396	10813779	AT1G30520	0.01964359875	+	20	119.704998	23.37974963	231.4540031
1	10814611	10816615	AT1G30530	0.036695804219999996	+	65	61.63999939	13.39600029	169.473999
1	10816615	10819419	AT1G30540	0.2849419173	-	16	68.29499817	15.43750012	181.3687534
1	10828372	10831656	AT1G30570	0.1960305634	+	28	84.57500076	18.64100037	139.78699650000001
1	10831672	10835635	AT1G30580	0.2124878591	-	252	67.13000107	11.81325037	196.6947475
1	10835734	10840872	AT1G30590	0.3076571727	-	41	186.6499939	27.52000046	335.4599915
1	10846512	10850724	AT1G30610	0.5168040958	+	39	98.76000214	13.72049997	250.5200058
1	10854516	10858280	AT1G30620	0.2035855752	+	12	88.63000107	26.63099961	210.6579971
1	10858231	10860322	AT1G30630	0.109538656	-	164	72.60499954	18.68124948	171.366246
1	10860618	10865074	AT1G30640	0.2841034127	+	11	101.45999909999999	38.89750004	158.8525009
1	10881478	10886472	AT1G30680	1.151363645	+	57	78.09999847	20.67200089	204.31200259999997
1	10887606	10890407	AT1G30690	0.48333012729999997	+	103	75.93000031	18.64100018	146.90750730000002
1	10936764	10942292	AT1G30810	0.31753159350000004	-	28	113.3899994	27.84074941	216.6957458
1	10944907	10949482	AT1G30820	0.5671464551	-	113	124.7399979	30.87599945	242.8940002
1	10960907	10963231	AT1G30825	0.23064706940000002	+	19	124.7399979	19.11600075	257.37199780000003
1	10966906	10968878	AT1G30835	0.01286741843	+	34	95.59000015	24.08949957	221.48975069999997
1	10979645	10980725	AT1G30845	0.03370882792	+	12	70.75999832	14.89525027	141.96849819999997
1	10993001	10994152	AT1G30880	0.17901564739999998	-	387	48.0	14.99950008	147.1689949
1	10994242	10996223	AT1G30890	0.1923948395	+	49	62.45999908	13.4380003	212.72399900000002
1	11000861	11003226	AT1G30910	0.6948007795000001	+	49	98.12000275	21.50399933	237.9900024
1	11040249	11043773	AT1G30970	1.6308846590000001	-	49	194.11999509999998	26.64800072	437.69799800000004
1	11054730	11056959	AT1G31010	0.2358823829	-	15	63.56000137	18.17099981	170.02649309999998
1	11057104	11059037	AT1G31020	0.2646144309	+	47	68.54000092	13.27999973	175.45849990000002
1	11084665	11088589	AT1G31070	0.008330953196000001	+	30	91.04999924	14.14749963	195.0412449
1	11104236	11108095	AT1G31120	0.19098469469999999	-	22	119.1450005	30.07224965	209.7827496
1	11114692	11116195	AT1G31130	0.4189942434	-	109	59.84999847	17.34599953	187.697995
1	11119826	11122675	AT1G31150	0.588944382	+	21	74.76000214	18.04500008	170.640007
1	11122603	11124220	AT1G31160	0.2802201889	-	102	95.97499847	15.11874976	262.6732548
1	11133409	11135189	AT1G31170	0.6857207444	+	185	80.79000092	16.25200005	223.1219971
1	11140470	11142716	AT1G31175	0.58374338	+	17	143.66000369999998	64.9359993	229.0560028
1	11142460	11144717	AT1G31180	0.8262655509000001	-	137	97.37999725	28.04800034	230.3280029
1	11144771	11146930	AT1G31190	0.19859617149999997	+	93	86.87000275	18.66699982	313.3339966
1	11156697	11158683	AT1G31220	0.18817659239999998	+	11	79.55999756	27.75499916	169.65499880000002
1	11158617	11163274	AT1G31230	0.7356581896	-	40	76.11999893	8.723249769	215.05000189999998
1	11181503	11185396	AT1G31280	0.7053571881999999	+	13	104.7600021	27.125	194.04300080000002
1	11188119	11192585	AT1G31290	0.08955814964	+	11	91.5	49.390001299999994	229.92749790000002
1	11193624	11196397	AT1G31300	0.5055907318999999	+	56	86.68999863	17.42374969	235.89500619999998
1	11214675	11216141	AT1G31330	3.355313588	-	11169	74.12000275	16.55799942	185.7200043
1	11216809	11217546	AT1G31335	0.141456266	-	15	54.75	7.59199996	131.524498
1	11217694	11219618	AT1G31340	1.076768505	-	179	63.27999878	10.43050017	154.7345016
1	11228871	11230053	AT1G31355	0.05210775324	+	11	105.16999820000001	73.7650032	200.427494
1	11232317	11237594	AT1G31360	0.008919775466999999	+	14	151.16999819999998	31.03299909	221.39350469999997
1	11246816	11249587	AT1G31410	0.07271308946	-	28	82.90499878	25.97875066	165.2269947
1	11249599	11253915	AT1G31420	0.04776570028	+	150	94.30999756	16.49600065	234.90949780000003
1	11255835	11258814	AT1G31440	0.6277786686	-	83	79.88999939	11.06999998	185.40799330000002
1	11273572	11276636	AT1G31500	0.6951242208	-	31	124.45999909999999	40.48250103	236.58750530000003
1	11288377	11293799	AT1G31540	1.156569866	-	15	104.55999759999999	34.28150053	200.4384995
1	11295445	11297379	AT1G31550	1.137626861	-	18	77.3200016	20.0877501	176.1740044
1	11310996	11311989	AT1G31580	3.473850205	+	1263	35.88000107	9.26199975	142.0264961
1	11312960	11316582	AT1G31600	0.1749810471	-	24	177.4800034	42.57850008	337.9329895
1	11326250	11330791	AT1G31650	0.3058947892	-	29	118.15000149999999	12.99299984	169.352005
1	11330923	11333540	AT1G31660	1.3396481679999999	-	56	85.75	10.703749900000002	215.73374750000002
1	11349696	11355587	AT1G31710	0.7382961584000001	+	66	61.65500069	12.39249969	161.2024994
1	11359511	11364288	AT1G31730	0.13054706929999998	+	56	100.9399986	28.13249993	227.3575058
1	11372393	11374301	AT1G31760	0.04796894559999999	-	22	66.49500084	19.56799912	136.1107487
1	11374759	11377885	AT1G31770	0.13388284109999998	-	15	68.25	19.02949977	168.1009972
1	11391198	11394748	AT1G31780	0.030778635630000002	+	48	72.57500076	23.60600009	179.2340034
1	11396401	11399714	AT1G31800	0.0967958882	+	129	109.6200027	15.04400005	244.44400330000002
1	11399606	11406809	AT1G31810	0.9318232493	-	17	127.75	38.45	246.1159912
1	11410765	11412233	AT1G31812	0.8136189001	-	1736	59.31500053	15.92249978	173.3812504
1	11412391	11414502	AT1G31814	0.7363851862999999	-	19	128.4600067	40.00599976	282.4655075
1	11414694	11416444	AT1G31817	0.06686454913999999	-	48	66.44000244	13.68550022	150.4130013
1	11416450	11418464	AT1G31820	1.05255669	-	28	91.29000092	31.64799938	159.8502483
1	11418588	11420961	AT1G31830	1.050634922	-	20	49.39999962	25.61524992	187.2942509
1	11422635	11423684	AT1G31835	0.40760073950000003	-	39	64.51999664	25.77300062	129.60999950000001
1	11430099	11434115	AT1G31850	0.5046700318	+	25	87.59999847	14.33399963	281.40199889999997
1	11434059	11436607	AT1G31860	0.17269991829999998	-	59	99.54000092	17.13549972	214.35799869999997
1	11436718	11440275	AT1G31870	0.10763239919999999	+	32	97.31999969	13.48399986	281.86599920000003
1	11445489	11450232	AT1G31880	0.1306908209	+	13	97.23999786	16.79600029	219.602002
1	11456801	11463896	AT1G31910	0.1813976977	+	145	104.33000179999999	19.29600029	273.29400019999997
1	11461854	11463857	AT1G31920	0.5436916375999999	-	54	64.36499786	13.55599978	128.4475023
1	11464933	11469207	AT1G31930	0.39845799200000004	+	30	86.31999969	36.08050113	145.05975
1	11469481	11470010	AT1G31935	0.5263098501	+	41	57.40999985	17.05999947	146.27999880000002
1	11470055	11471481	AT1G31940	0.8661923717	-	62	74.57500076	13.88524978	181.2874962
1	11479762	11482890	AT1G31970	0.5784361772	+	150	95.54999924	13.54049981	254.5987576
1	11528384	11531350	AT1G32050	1.414584909	+	270	84.84000015	15.08674974	237.4077469
1	11532198	11534639	AT1G32060	4.720064332	+	2334	67.16999817	15.77975037	181.59799999999998
1	11534606	11536437	AT1G32070	0.3016374644	-	183	93.25	13.38749976	248.73900530000003
1	11537241	11539896	AT1G32080	4.588747935	-	440	94.95500183	17.95199909	233.83625409999996
1	11539992	11544166	AT1G32090	0.15640722	-	27	120.29000090000001	59.96450119	233.8554977
1	11546159	11548016	AT1G32100	0.183530539	-	25	55.5	15.20599976	204.8679962
1	11556743	11558702	AT1G32127	0.1607357428	+	11	83.70999908	44.74750042	224.3274994
1	11558754	11561920	AT1G32130	0.5990929809000001	-	94	82.72500229	13.16600032	239.1415024
1	11565493	11568645	AT1G32150	0.8688508273000001	+	29	108.7600021	13.43000021	217.90799869999998
1	11568653	11570438	AT1G32160	0.9398122795999999	+	161	100.13999940000001	19.25	226.83000180000002
1	11575319	11578030	AT1G32170	0.02447380061	+	36	84.46500015	15.44749999	182.8412514
1	11592926	11596056	AT1G32190	0.09972304531	-	34	85.83000183	21.72949953	190.6347466
1	11601670	11605174	AT1G32200	0.5686173401	-	123	100.63999940000001	18.17850037	221.3415054
1	11605605	11607866	AT1G32210	1.095243922	-	150	68.02000046	12.42875028	215.1165016
1	11607853	11609968	AT1G32220	2.608685092	+	367	70.36000061	13.11550007	173.3155045
1	11611890	11617419	AT1G32230	0.9322655702	+	179	111.6200027	23.02150021	283.216008
1	11625615	11630745	AT1G32240	0.5803963645	-	12	102.329998	38.91374903	226.9730003
1	11640557	11641889	AT1G32260	1.129128295	-	27	96.37999725	33.28299923	194.37750400000002
1	11653499	11654833	AT1G32310	1.401202337	+	43	74.44000244	21.29949923	190.5499931
1	11663007	11666120	AT1G32340	0.2299492268	-	17	94.87000275	24.69400024	241.6
1	11672765	11675387	AT1G32360	0.8280646956000001	+	54	100.5550003	9.543499851	193.8317486
1	11676924	11678692	AT1G32370	1.011168743	+	21	92.33000183	29.34000015	321.8399963
1	11681733	11684520	AT1G32380	0.4228387019	+	24	96.46500015	46.26699839	207.0660011
1	11689063	11691588	AT1G32400	0.06282284469999999	-	256	52.61499977	10.96624982	233.24625209999996
1	11693798	11695575	AT1G32410	0.2739976204	+	94	75.89500046	13.16200016	163.707251
1	11711943	11715162	AT1G32440	0.3267122895	+	59	83.94000244	15.78099995	172.4834999
1	11715146	11719988	AT1G32450	0.040628297710000004	-	46	72.61000061	23.37749958	153.64374919999997
1	11738117	11739326	AT1G32460	0.19625625859999998	+	146	66.76499939	14.47500026	206.1237545
1	11739303	11740399	AT1G32470	3.447930105	-	933	63.83000183	14.39799995	163.1560043
1	11742005	11749788	AT1G32490	0.029702614210000002	-	26	105.4950027	26.73375034	255.97875209999998
1	11749797	11752190	AT1G32500	0.3495333747	-	129	68.65000153	19.02800026	198.0880005
1	11758210	11759324	AT1G32520	0.2745899931	-	85	78.08000183	20.75300064	215.3049957
1	11759426	11762635	AT1G32530	0.3015398811	-	34	98.13000107	30.0984993	231.30174869999996
1	11767484	11770049	AT1G32540	0.47596425810000004	+	46	129.875	19.87625051	251.46999359999998
1	11771620	11774294	AT1G32550	0.9231931701999999	-	140	83.0	19.82100039	193.9445061
1	11774483	11775442	AT1G32560	0.4967758383	+	44	61.81499863	8.622000003	165.27374530000003
1	11783542	11785704	AT1G32580	0.5505988575999999	+	143	71.61000061	14.38099961	158.98700490000002
1	11785805	11788286	AT1G32583	0.01940932786	+	19	94.62000275	24.99449968	181.9405022
1	11798118	11801407	AT1G32640	0.2723316287	-	88	75.24499893	27.48075008	157.0587448
1	11820871	11821824	AT1G32690	0.024234511009999998	-	34	75.85499954	18.81650023	168.956498
1	11827358	11829933	AT1G32700	0.46988461369999995	+	256	85.20999908	15.88874996	175.8350029
1	11840909	11843308	AT1G32730	0.06581458029000001	+	23	61.24000168	13.76600058	157.17150039999999
1	11874507	11877549	AT1G32790	1.196359353	-	217	83.79000092	17.76199951	226.92599790000003
1	11881310	11886015	AT1G32810	0.08630678659	+	39	103.4000015	17.19700022	338.8700027
1	11911630	11913947	AT1G32870	0.1213905863	+	17	80.68000031	21.85800018	180.2940002
1	11920389	11923866	AT1G32900	3.721082415	-	437	64.0	11.21400023	189.02599640000003
1	11928756	11929993	AT1G32920	1.172408342	+	316	74.94499969	18.61874986	181.4587555
1	11931148	11931801	AT1G32928	0.7469533974	+	37	78.30999756	28.03700008	149.94500119999998
1	11937182	11941116	AT1G32940	0.9963503493000001	+	12	121.93500139999999	76.67999802	201.990995
1	11955655	11957402	AT1G32990	2.299763179	+	507	85.04000092	15.58400006	193.63549799999998
1	11966422	11967843	AT1G33040	0.4860555499	+	135	59.68000031	9.960999727	160.12300190000002
1	11967782	11971532	AT1G33050	1.078149195	-	60	108.1450005	23.20474963	373.5890129
1	11971307	11972580	AT1G33055	0.2003072725	-	58	70.94499969	13.816750099999998	176.96650119999998
1	11975306	11978622	AT1G33060	0.4899785917	-	19	85.93000031	15.43600035	182.04150239999998
1	12002237	12003005	AT1G33102	0.7868980187000001	-	13	66.16000366	29.38699951	165.4409981
1	12004853	12008852	AT1G33110	1.245865855	+	97	88.94999695	31.64999962	215.2919952
1	12010878	12012547	AT1G33120	0.48462908899999996	+	1260	68.72999954	14.80849993	194.2244991
1	12023224	12024783	AT1G33140	0.495828276	+	1591	63.63999939	15.584999800000002	185.1899986
1	12026935	12030539	AT1G33170	1.215824831	+	62	72.61000061	19.73324966	157.8899994
1	12046378	12050095	AT1G33230	0.6224682136	+	55	113.1999969	25.84100027	285.7570038
1	12051360	12054753	AT1G33240	1.1030459	-	107	87.91000366	11.40299988	197.1080025
1	12057197	12059792	AT1G33250	0.06849564763999999	-	32	81.43500137	31.637251000000003	180.5504986
1	12066594	12068101	AT1G33265	0.4044232311	+	17	95.45999908	29.242000199999996	170.6560028
1	12068062	12070455	AT1G33270	0.49945946700000005	-	57	105.02999879999999	21.80999985	216.6839996
1	12074098	12076289	AT1G33290	0.09051361307	+	45	83.37000275	26.14899998	198.69199980000002
1	12084913	12086883	AT1G33330	0.422436596	+	45	67.91999817	25.94199924	182.88299709999998
1	12091779	12096486	AT1G33360	0.34331890049999997	+	11	156.03999330000002	31.22249985	235.0649986
1	12104707	12109531	AT1G33400	0.2787418591	-	12	147.06000519999998	39.89600134	292.8927521
1	12109560	12118861	AT1G33410	0.6496963362	-	30	99.9849968	47.84449959	278.65450130000005
1	12120885	12123576	AT1G33420	0.06152966392000001	-	13	79.70999908	40.96499977	165.1060059
1	12144439	12147208	AT1G33470	1.5583995769999999	+	74	65.24000168	17.46324935	212.23074989999998
1	12150673	12152460	AT1G33490	0.16783891480000002	-	45	86.95999908	15.66499977	221.37099759999998
1	12157053	12159125	AT1G33520	0.1414413689	-	50	63.93499947	20.40900002	163.1345016
1	12177672	12179628	AT1G33590	0.7469506659	+	120	65.25999832	15.18450027	146.772504
1	12180482	12184528	AT1G33600	1.487957648	+	76	78.19499969	15.17874956	198.3325024
1	12188677	12190461	AT1G33610	1.1565709	+	15	82.37000275	42.51699944	537.1460167
1	12203944	12208698	AT1G33680	0.060452596920000004	+	69	86.04000092	23.65399971	201.7300003
1	12244559	12246231	AT1G33780	0.42483260700000003	-	79	95.16000366	15.97400079	207.77999880000002
1	12256473	12260638	AT1G33790	0.8377423929000001	+	17	100.5699997	32.06999969	176.123999
1	12261164	12262750	AT1G33800	0.1820969931	+	11	65.48000336	34.05500031	147.7750034
1	12264941	12266920	AT1G33810	0.31441998600000004	+	220	62.61000061	13.16424994	171.1874985
1	12267807	12269913	AT1G33811	0.148006478	+	88	57.68000031	13.88949995	137.68599819999997
1	12349303	12351318	AT1G33970	0.4747808954	-	89	81.95999908	14.65400047	210.0779938
1	12351565	12355173	AT1G33980	0.2584148074	+	53	102.26999659999998	19.71299973	252.1869949
1	12355556	12358031	AT1G33990	1.915675578	+	137	96.45999908	15.04799995	207.11200259999998
1	12357909	12358966	AT1G34000	1.875269874	-	730	66.97500229	12.90649996	157.10500109999998
1	12359453	12361313	AT1G34010	0.05356915749	-	44	82.40499878	17.80174923	179.26174699999999
1	12366809	12370014	AT1G34020	0.3233318262	+	40	110.7400017	33.78899984	174.9002506
1	12370064	12371554	AT1G34030	2.296814217	-	562	73.72000122	14.54274995	198.1194939
1	12429845	12433236	AT1G34130	0.5381409969	+	45	89.12000275	30.98799934	225.0930008
1	12435881	12439499	AT1G34150	2.141968183	+	13	145.5	74.97500229	213.451004
1	12451404	12454542	AT1G34190	0.09907073736	+	87	71.20999908	19.13049974	154.1009995
1	12455652	12457547	AT1G34200	0.06797204332000001	+	22	66.90499878	27.12649989	572.7414928
1	12458563	12462905	AT1G34210	1.5922166130000002	+	28	199.4599991	44.53424935	304.4892517
1	12462848	12466089	AT1G34220	1.233193901	-	40	94.77999878	17.3705003	153.3807564
1	12485317	12492207	AT1G34260	0.8164351490999999	+	11	113.3700027	66.17000198	192.86749650000002
1	12503359	12506172	AT1G34300	0.2895045425	+	30	86.93500137	16.63475075	287.9277443
1	12520058	12524377	AT1G34320	0.148372596	+	48	122.50500109999999	26.96800022	253.8980003
1	12530814	12534306	AT1G34340	0.33198841100000004	+	27	156.63000490000002	57.12800083	305.9050079
1	12534425	12536162	AT1G34350	0.48795797539999997	+	40	58.93000031	19.48974962	147.794244
1	12542795	12546244	AT1G34360	0.5603703879	+	18	100.7700005	19.71275034	200.8472458
1	12550338	12552629	AT1G34370	2.779536727	+	103	97.0	18.74099979	199.2459946
1	12582121	12582721	AT1G34418	2.827139395	+	181	75.5	16.16499996	195.2700043
1	12587725	12590223	AT1G34430	0.9404470886	-	176	74.78499985	12.1937499	169.31750490000002
1	12604160	12607033	AT1G34470	0.29582574559999997	+	44	134.41000369999998	17.62125006	270.6942368
1	12646673	12652646	AT1G34550	0.2197367298	-	46	83.34500122	22.34374952	188.3237476
1	12654926	12656605	AT1G34570	1.4632866009999999	-	26	79.46999741	43.58374834	200.48875049999998
1	12685175	12687641	AT1G34630	2.792089895	+	13	151.86999509999998	74.29199982	202.4220016
1	12687551	12688543	AT1G34640	0.4601318715	-	41	98.04000092	21.14999962	238.7200012
1	12735999	12738196	AT1G34750	0.03880541938	-	18	86.35000229	17.50300016	145.93549769999998
1	12743721	12745748	AT1G34760	1.065625105	-	55	112.2699966	19.85800028	324.4774979
1	12746404	12748617	AT1G34770	0.1972274663	+	20	85.82500076	19.54800017	286.4160042
1	12748570	12750506	AT1G34780	0.26048518260000003	-	39	81.84999847	18.10049925	214.19299619999998
1	12842157	12845455	AT1G35115	0.0001738597446	+	33	106.5899963	37.21199913	297.9200073
1	12851982	12853235	AT1G35140	0.04299477286	+	36	72.67000198	22.51624942	216.1324997
1	12867080	12868890	AT1G35160	0.4358278588	+	229	66.80999756	15.29800024	207.9419983
1	12877106	12878835	AT1G35180	0.8404581925	-	19	63.31999969	31.86100054	133.9784966
1	12890403	12892955	AT1G35190	0.10110330470000001	+	61	83.87999725	12.52499962	265.57499690000003
1	12908847	12914858	AT1G35220	0.7485759029000001	+	15	82.26999664	27.31700087	197.9634949
1	12936848	12937787	AT1G35260	0.06317485641	-	12	52.01000023	34.317749600000006	159.29099309999998
1	12956118	12957090	AT1G35310	0.35979612240000003	-	15	53.95999908	16.05549994	111.56849820000001
1	12958840	12962853	AT1G35320	0.15914723949999998	-	14	90.61500168	54.74324903	182.5859959
1	12977667	12979947	AT1G35340	0.4162574403	+	86	110.9249992	22.75249958	311.0074883
1	12980688	12984740	AT1G35350	0.3432759533	-	21	104.1999969	25.2850008	218.36499790000002
1	13026205	13027691	AT1G35420	0.1247960748	+	144	90.58499908	22.03750024	181.2575031
1	13030552	13031375	AT1G35430	0.11702922660000001	-	29	64.31999969	14.54099979	136.488002
1	13039659	13042159	AT1G35460	0.5987096175	+	46	75.23999786	13.14750004	195.659996
1	13051156	13055093	AT1G35470	0.4850844673	-	37	92.0	13.09500008	196.70099950000002
1	13071164	13074984	AT1G35510	0.08886436358	+	33	114.5599976	44.09800034	259.5319946
1	13078415	13079773	AT1G35516	4.8373947280000005	+	116	134.7600021	22.88749909	291.0024872
1	13115825	13117235	AT1G35560	0.6152086862	-	37	71.58999634	21.03400078	136.7540024
1	13122081	13125328	AT1G35580	0.7693002205	-	244	73.40000153	15.23749957	193.7732483
1	13145642	13146693	AT1G35612	0.035435315110000004	+	59	155.2599945	59.76799927	259.86899950000003
1	13156345	13158467	AT1G35620	0.4179414381	+	117	78.44000244	14.87800035	172.173999
1	13205344	13208289	AT1G35670	0.1518715133	+	19	105.4499969	20.49150038	163.8824966
1	13208682	13210428	AT1G35680	2.3345993640000002	+	984	75.33000183	15.641249800000002	190.4542503
1	13225167	13227239	AT1G35720	0.2411362796	+	318	60.32999992	18.70249977	155.8344955
1	13277258	13280387	AT1G35780	1.5254286469999998	-	29	143.2400055	39.00000019	237.3650009
1	13450088	13453683	AT1G36050	0.4191515577	+	56	69.30999756	19.48250008	216.9599991
1	13466693	13470936	AT1G36070	0.9866760526	-	20	101.9750023	17.81974978	223.84500010000002
1	13533167	13544015	AT1G36160	0.002246915888	+	81	116.7300034	23.52000046	334.3399963
1	13640507	13643126	AT1G36280	0.0057136701190000005	+	20	75.73999786	13.70500064	188.62099650000002
1	13669424	13671203	AT1G36310	0.323337168	+	92	72.94499969	15.11799984	157.3449993
1	13671773	13674205	AT1G36320	2.226672203	+	204	75.84499741	14.57775042	203.8792496
1	13696041	13698739	AT1G36370	0.25473846769999997	-	95	95.34999847	25.25199928	181.2385017
1	13700764	13701632	AT1G36380	1.078673479	+	57	64.65000153	20.6	138.5679993
1	13701400	13703573	AT1G36390	0.6115790962	-	75	85.95999908	15.21099977	262.875
1	13898209	13900831	AT1G36730	0.3201610455	-	175	79.30999756	26.59900036	217.2704994
1	14003818	14005502	AT1G36940	0.5505830647	+	26	78.13000107	16.57749999	155.7300024
1	14024633	14027040	AT1G36980	1.039611657	+	367	56.45999908	13.07149973	185.6439987
1	14027221	14030500	AT1G36990	0.6661106485	-	18	59.92499924	26.72625003	115.0475054
1	14158451	14161938	AT1G37130	0.2695744466	+	1030	72.98999786	18.31875019	185.88699419999998
1	14289532	14292098	AT1G38065	0.1552440226	-	15	133.6999969	71.46500092	246.6044998
1	14292995	14296253	AT1G38131	0.44958774869999996	-	19	130.6499939	53.17750092	237.23149869999997
1	15603567	15607966	AT1G41830	0.1974607009	-	79	68.16000366	14.44100003	201.5209969
1	15650634	15652542	AT1G41880	1.87783222	-	921	65.19000244	12.84000015	181.97000119999998
1	15891280	15894576	AT1G42430	0.3063162506	+	35	85.77999878	22.11249948	206.4574936
1	15895196	15900105	AT1G42440	0.4476134077	-	55	86.5	18.92649946	191.38299640000002
1	15926675	15935529	AT1G42470	0.1367206328	+	16	140.5	34.69124937	320.041254
1	15936155	15938974	AT1G42480	0.8277379898	+	45	87.11000061	10.25400038	199.45099330000002
1	15973053	15976813	AT1G42540	0.008717669031999999	+	26	93.23500061	13.98999977	277.95500560000005
1	15976804	15979952	AT1G42550	2.912739456	+	168	77.73999786	14.05075018	174.87199819999998
1	16125742	16127298	AT1G42960	0.3636048699	+	468	64.77000046	12.25749984	189.03899769999998
1	16127352	16129895	AT1G42970	8.443781106	+	3116	75.12000275	15.604999900000001	200.9462452
1	16135722	16137463	AT1G42990	2.895054959	-	56	60.31000137	12.49374986	155.9849987
1	16228188	16231254	AT1G43130	1.671860492	-	60	110.6849976	12.80925004	230.7889999
1	16266552	16268945	AT1G43170	0.7004065071	+	1456	62.20999908	12.011249900000001	168.378746
1	16275107	16278742	AT1G43190	0.4100312239	-	112	81.76499939	16.98100004	238.554998
1	16397978	16399880	AT1G43560	0.9949441709000001	-	266	68.11999893	14.70999992	163.8999996
1	16410371	16412736	AT1G43580	0.25383337	-	45	54.0	11.50899963	153.59400180000003
1	16425411	16430287	AT1G43620	0.2274694605	-	23	92.06999969	11.43650007	179.12200159999998
1	16467297	16470500	AT1G43670	2.478299996	+	332	86.94999695	13.54324968	216.5922443
1	16478158	16482859	AT1G43690	1.09967979	+	81	70.08999634	15.71000004	343.0
1	16484230	16486327	AT1G43700	0.3018470457	+	122	57.63500023	14.77474983	174.1867523
1	16486229	16488462	AT1G43710	1.298490009	-	136	73.38500214	13.46750009	174.2662487
1	16575758	16576541	AT1G43790	0.9959232104000001	+	60	54.695001600000005	21.37724977	138.248494
1	16616987	16622049	AT1G43850	1.115916053	+	76	86.40999985	12.80499995	273.5600014
1	16620768	16624504	AT1G43860	1.028128156	-	47	92.59999847	15.39799995	193.6640053
1	16646695	16648648	AT1G43890	0.04622110267	+	148	68.56499863	16.05399995	189.2617527
1	16654029	16655928	AT1G43900	0.3937669622	+	71	71.19000244	18.10000038	229.6775017
1	16708003	16709713	AT1G44000	0.7423115946	-	232	89.30500031	21.44624963	238.5404961
1	16764391	16767685	AT1G44100	0.25212294539999996	-	34	82.86500168	14.98400006	205.432243
1	16796399	16800321	AT1G44170	0.3954453604	-	24	54.12000084	17.700999499999998	184.912748
1	16834209	16838562	AT1G44350	0.45418443	-	92	80.63000107	20.73650036	216.24700130000002
1	16848307	16851271	AT1G44446	1.197348226	-	476	105.33000179999999	20.49124956	241.85374449999998
1	16870220	16873427	AT1G44575	29.18336179	+	4084	68.01499939	13.46300004	166.135743
1	16892526	16896089	AT1G44750	1.8908066959999998	+	45	89.68000031	33.5480011	184.61499630000003
1	16896678	16898645	AT1G44760	0.5975170127	-	64	76.10500336	15.08349996	217.7112526
1	16907536	16909572	AT1G44770	0.5547069756	-	141	78.5	14.71000004	234.8550034
1	16912153	16913664	AT1G44790	0.1032092373	-	62	93.40500259	13.77949984	198.9205006
1	16913993	16917053	AT1G44800	0.2791990361	-	24	65.43999863	32.46900039	242.9975002
1	16923439	16924821	AT1G44810	0.314519074	+	83	51.31999969	11.07849989	157.40750730000002
1	16926296	16929196	AT1G44820	0.8857188134	+	63	78.40000153	21.94199963	213.3504974
1	16939691	16942558	AT1G44835	0.3615498982	+	53	97.22000122	10.11299992	201.6929993
1	16970213	16974753	AT1G44900	0.7161151273	+	14	79.90500259	17.83799932	156.9502537
1	16982903	16984444	AT1G44920	1.4334345069999999	-	178	68.78000259	14.56425011	177.68400119999998
1	16999445	17001734	AT1G44960	1.532803374	+	40	88.7899971	12.21674995	221.4909954
1	17009050	17011929	AT1G45000	0.004163428464	+	177	76.97000122	13.72399979	188.8279938
1	17013384	17015520	AT1G45010	0.0415312845	-	31	69.37000275	26.64999986	196.0824966
1	17031210	17033269	AT1G45050	0.1366438063	+	50	85.38499832	25.29074965	250.32675550000002
1	17052474	17054827	AT1G45110	0.0005642497049	+	14	95.99499893	26.98049884	189.0804996
1	17065110	17069269	AT1G45130	0.8148022226999999	+	54	88.45500183	15.86149995	184.1995045
1	17074941	17076417	AT1G45145	1.4156047090000001	-	91	59.22000122	15.084999800000002	156.7599983
1	17077385	17082592	AT1G45150	0.7674675262	-	16	113.7600021	22.13499975	220.9449997
1	17083076	17090588	AT1G45160	0.225821105	-	30	109.4799995	39.04624929	207.48850019999998
1	17090676	17091464	AT1G45163	0.2472514026	-	37	60.16999817	19.14799957	246.38600010000002
1	17095979	17098041	AT1G45170	0.3877754126	-	38	63.04000092	15.92624986	217.12225690000002
1	17115761	17119246	AT1G45191	0.3632023537	+	12	152.8349991	23.45149956	330.7952538
1	17123784	17129223	AT1G45201	0.5845886889	+	165	60.72000122	14.17699966	214.06099700000001
1	17152895	17154843	AT1G45233	0.2395017618	+	21	82.08999634	20.32499981	226.5550079
1	17165124	17167924	AT1G45249	0.051038810360000006	-	29	82.5	8.771999884	197.1859985
1	17169435	17171472	AT1G45230	2.0836607369999998	-	126	84.58499908	16.70249963	174.9962482
1	17172120	17177060	AT1G45332	0.06357029605	-	42	82.81499863	30.46524982	244.6385017
1	17179249	17180806	AT1G45474	1.183876004	+	460	81.64500046	19.54950023	216.6774986
1	17191361	17193314	AT1G45688	1.222623599	+	165	69.05999756	12.08400002	215.9850006
1	17199313	17200841	AT1G45976	0.1126178635	+	54	89.25	12.90500009	202.629998
1	17252951	17253903	AT1G46554	0.00015002509559999998	+	36	89.39999771	26.81499946	187.4437542
1	17265585	17266824	AT1G46768	0.09269842666000001	-	19	70.51999664	13.28599997	217.2985001
1	17275889	17277839	AT1G47056	0.11017039390000001	-	23	71.33000183	18.35350018	119.76949840000002
1	17282748	17285749	AT1G47128	2.315682739	-	905	64.95999908	15.02399998	168.547998
1	17297830	17298829	AT1G47200	0.6563757232	-	158	51.94499969	11.46424961	122.65000079999999
1	17300690	17302914	AT1G47210	0.06334875802	+	19	72.0	18.10600033	271.23048860000006
1	17306573	17308848	AT1G47230	0.09834765939	+	21	80.59999847	22.94499969	174.4799957
1	17308802	17311505	AT1G47240	0.8850066472	-	14	124.08000179999999	29.85374963	200.7010014
1	17319118	17321202	AT1G47250	0.2032198118	+	68	66.16500092	17.24599977	163.24349819999998
1	17319550	17323484	AT1G47260	0.053210583480000004	-	210	58.65999985	13.99199975	169.2175018
1	17326529	17328772	AT1G47270	0.41197396350000004	+	20	86.88000107	19.01149986	248.0027496
1	17330818	17332336	AT1G47278	0.32591349140000003	+	72	86.83499908	22.41399994	239.2810009
1	17335750	17339275	AT1G47290	0.2953598322	+	20	83.14500046	40.0037508	216.12349700000001
1	17342738	17344828	AT1G47310	0.421390376	+	73	76.19000244	16.292000199999997	229.51999819999997
1	17351017	17353875	AT1G47330	0.1711096073	+	17	120.8099976	25.20600014	196.3920044
1	17353846	17356564	AT1G47340	0.05038914456	-	12	76.61000061	18.99449999	349.3547409
1	17372370	17376091	AT1G47380	1.03899997	-	17	93.62999725	13.14599972	224.1439972
1	17382997	17383830	AT1G47395	0.046126169950000004	+	46	54.984998700000006	12.13874972	132.2312508
1	17385706	17386485	AT1G47400	0.4488101856	+	18	36.375	10.40799978	137.3137518
1	17394071	17395673	AT1G47410	0.07757120936	+	13	75.20999908	29.3970005	185.3320023
1	17395517	17397263	AT1G47420	0.1727778995	-	325	55.70999908	11.11500034	173.365004
1	17424472	17427475	AT1G47490	0.2750027687	+	69	115.5	21.78499947	258.3769943
1	17432432	17435124	AT1G47500	0.2335518262	+	84	101.88999940000001	16.90724998	236.43700409999997
1	17451552	17454461	AT1G47530	0.10680835890000001	+	133	79.08000183	14.61800003	179.8899979
1	17456986	17465195	AT1G47550	0.2449880638	+	48	96.73999786	15.07150004	254.6792377
1	17477578	17483502	AT1G47570	0.1825532274	+	29	97.95999908	34.47500057	216.875
1	17485575	17486463	AT1G47580	0.03567288843	+	48	52.5	14.22574999	104.174999
1	17518046	17520129	AT1G47640	0.1920481507	-	57	71.30000305	15.04800014	176.1440033
1	17536624	17539719	AT1G47670	0.6371323398	-	27	74.29000092	14.54599986	236.2919975
1	17557090	17560331	AT1G47710	0.7885567158	+	44	86.11999893	14.21375041	186.91025119999998
1	17561285	17562934	AT1G47720	0.2039194707	-	20	87.125	23.91674976	176.0267464
1	17566510	17569297	AT1G47740	0.3283109169	+	72	59.03499985	12.65375037	207.8742451
1	17569255	17570159	AT1G47750	0.8019379312	-	24	43.05000114	8.348499882	110.659749
1	17611904	17612613	AT1G47820	0.05187006038	+	35	61.77000046	15.56899991	271.81549680000006
1	17613028	17614986	AT1G47830	0.6190035702000001	-	82	64.20000076	15.09149992	250.0937489
1	17634696	17637809	AT1G47870	0.6010118702	+	11	91.79000092	33.15750122	256.1374931
1	17647143	17651791	AT1G47900	0.461902651	-	19	82.23999786	26.42949867	302.19000550000004
1	17681156	17683719	AT1G47960	0.5252308474	-	58	70.15500259	10.01425002	156.3499966
1	17686989	17688859	AT1G47970	0.8963408359	+	107	75.38999939	19.18599987	197.98550490000002
1	17716892	17719500	AT1G48030	0.6790317516	-	342	62.90999985	13.49249978	178.42599950000002
1	17723381	17727243	AT1G48050	0.5523714525	+	23	135.32000730000001	38.23150158	305.2195114
1	17732009	17758508	AT1G48090	0.6706254035	-	16	152.2400055	57.97875023	359.4975014
1	17766737	17769951	AT1G48100	0.03938027521	+	11	92.37000275	36.30999851	153.65750500000001
1	17769937	17773518	AT1G48110	0.32403965760000003	-	33	74.33000183	23.223999399999997	187.826001
1	17780428	17781727	AT1G48130	0.3085743328	+	27	75.76000214	15.52549963	220.3559929
1	17781987	17784211	AT1G48140	1.502882981	+	44	95.72000122	14.46825011	161.0927517
1	17786497	17789024	AT1G48160	0.29170417390000003	-	80	72.88499832	14.66250019	190.9844982
1	17788762	17790246	AT1G48170	1.070930003	+	45	67.41000366	19.72999935	187.54900669999998
1	17790363	17792340	AT1G48175	0.007509145082000001	+	16	98.88999939	25.33874941	242.58750719999998
1	17796763	17798337	AT1G48200	0.3563626807	-	26	76.67499924	22.72625089	177.3412514
1	17798430	17802330	AT1G48210	0.05923270357999999	+	22	79.14999771	21.13474994	178.36549419999997
1	17805760	17808993	AT1G48230	0.1070530524	+	52	90.13499832	20.05274978	196.1045002
1	17808987	17812106	AT1G48240	0.05251703998	-	50	77.09500122	15.60474999	189.7544991
1	17827952	17830420	AT1G48270	0.6699198961	-	11	142.11999509999998	23.53249967	281.24999239999994
1	17847041	17848338	AT1G48300	3.928887822	+	590	75.67499924	14.35450001	193.5157494
1	17854812	17855715	AT1G48320	0.8829135222	-	66	85.88999939	14.80874979	191.0224991
1	17863659	17864558	AT1G48330	2.015846679	+	17	81.45999908	34.72400055	120.9060013
1	17867101	17868432	AT1G48350	1.172634051	+	776	72.50499725	14.68750012	182.4575024
1	17876988	17879270	AT1G48380	0.6947160055	-	25	101.44000240000001	19.42399979	225.22600099999997
1	17885632	17892632	AT1G48410	2.21800104	-	155	133.7200012	23.05300064	271.9010025
1	17895783	17898813	AT1G48420	0.07235932189	-	84	80.58000183	18.372000600000003	232.7660019
1	17902631	17906873	AT1G48430	1.6256746819999999	-	31	80.52999878	17.61250019	277.3774986
1	17906870	17908534	AT1G48440	1.53072493	+	292	50.78000069	13.032749800000001	161.70100559999997
1	17908502	17910523	AT1G48450	1.467841746	-	274	67.68000031	16.35849934	156.3032486
1	17910778	17913344	AT1G48460	0.1827684945	+	34	81.30500031	28.66099925	303.2679955
1	17918206	17921116	AT1G48480	1.586033157	+	55	71.30000305	12.26000023	151.43800280000002
1	17921899	17928954	AT1G48490	0.18677499239999998	-	26	106.5850029	28.73499966	275.1574936
1	17940049	17942864	AT1G48520	0.056184524570000005	+	83	107.20999909999999	14.90800004	270.9735046
1	17945368	17950598	AT1G48540	0.4215590771	+	32	131.9400024	25.02900019	266.2857513
1	17950568	17952743	AT1G48550	0.031369766810000005	-	14	129.17999650000002	25.52775021	240.7104881
1	17953869	17957719	AT1G48570	0.7866526466	-	34	92.25500107	12.44824975	178.5645039
1	17965870	17969354	AT1G48600	0.1811968614	+	135	65.27999878	16.57850008	200.6274971
1	17970610	17973402	AT1G48610	0.5805092251	-	38	62.28000069	10.73249973	245.25200120000002
1	17973641	17976663	AT1G48620	0.7199790173	-	88	91.65499878	14.51275008	192.12825159999997
1	17981635	17983377	AT1G48630	0.19826133280000002	-	192	78.31999969	19.2152504	192.0680058
1	17983645	17986292	AT1G48635	0.03435556665	+	46	97.7899971	13.33749962	234.5300007
1	17989130	17995339	AT1G48650	2.025405751	-	38	74.88500214	17.3172497	251.7792442
1	18030703	18031593	AT1G48745	0.5947007489	+	17	51.04000092	31.69799995	100.0599991
1	18035966	18036510	AT1G48750	1.118595559	+	92	41.58499908	11.99999983	124.0697508
1	18035966	18039405	AT1G48760	0.932497893	-	19	53.56999969	13.65749984	169.6540001
1	18040128	18041447	AT1G48770	0.7380821141	+	12	65.80500031	9.062999582	106.95900139999999
1	18043671	18047806	AT1G48790	0.32506689920000004	-	44	100.7700005	24.30799952	244.3309971
1	18059449	18061302	AT1G48830	0.2582484611	-	444	63.26499939	12.74199984	181.5439968
1	18061355	18065031	AT1G48840	0.0005479502857999999	+	29	111.04000090000001	24.02000008	205.93400269999998
1	18064904	18068154	AT1G48850	1.694532401	-	100	88.45000076	12.91800008	223.69324530000003
1	18068697	18071667	AT1G48860	0.8741938028	-	100	74.95999908	18.74125009	169.8672558
[truncated: 11,711 more rows]
