# Supplementary material for: Nanopore direct RNA sequencing maps the complexity of Arabidopsis mRNA processing and m6A modification
Source: eLife. 2020 Jan 14;9:e49658. doi: 10.7554/eLife.49658 (PMC6959997; doi:10.7554/eLife.49658)
Supplement: Figure 3—figure supplement 1—source data 1. [file elife-49658-fig3-figsupp1-data1.xlsx]

## Sheet: Sheet1
chrom	start	end	strand	mirna_ids	log_odds	fdr
1	26036753	26036793	+	miR156i	8.70044	0.0448492
2	19472854	19472894	+	miR5021	7.78136	0.0147525
5	8469179	8469219	-	miR1886.1	7.37069	0.00773454
2	16537879	16537919	-	miR173-5p	5.88264	0.00773454
3	22411533	22411573	-	miR170-3p,miR171a-3p	5.70044	0.000294647
2	13446050	13446090	+	miR1886.1	5.32193	0.035919
2	18619117	18619157	-	miR170-3p,miR171a-3p	5.08746	0.000294647
5	5371817	5371857	+	miR5021	5.08746	0.0423814
1	29274179	29274219	+	miR160a-5p,miR160b,miR160c-5p	4.9542	0.000268766
2	18619120	18619160	-	miR171b-3p,miR171c-3p	4.90689	0.00475931
2	12115731	12115771	+	miR160a-5p,miR160b,miR160c-5p	4.80735	0.000489317
3	22411536	22411576	-	miR171b-3p,miR171c-3p	4.75489	0.00479819
2	9072944	9072984	-	miR5021	4.70044	0.032895
5	19624149	19624189	-	miR1886.1	4.20945	0.0423814
3	19120499	19120539	-	miR5021	3.90689	0.027285
4	14704130	14704170	-	miR160a-5p,miR160b,miR160c-5p	3.80735	0.00097185
2	16539980	16540020	-	miR173-5p	3.58496	0.00773454
2	15474590	15474630	-	miR1886.1	3.45943	0.0221803
3	9870228	9870268	+	miR393a-5p,miR393b-5p	3.32193	0.00748903
2	11722070	11722110	-	miR173-5p	3.32193	0.00773454
1	24687255	24687295	-	miR5020a	3.2074	0.0450192
5	14633830	14633870	+	miR167c-5p	3.16993	0.00354165
5	24590108	24590148	+	miR5020a	3.16993	0.0450192
5	14633831	14633871	+	miR167a-5p,miR167b,miR167d	3.16993	0.0135886
Mt	303169	303209	-	miR779.2	3.16993	0.0423814
1	20947131	20947171	-	miR164a,miR164b-5p,miR164c-5p	3.16993	0.00111353
2	3362984	3363024	+	miR779.2	3.16993	0.0423814
2	15271735	15271775	-	miR396a-5p,miR396b-5p	3.11548	0.00742365
1	18549649	18549689	-	miR173-5p	3.08746	0.02716
1	4369074	4369114	-	miR393a-5p,miR393b-5p	3	0.00787047
4	17726394	17726434	-	miR396a-5p,miR396b-5p	3	0.00742365
2	18917932	18917972	-	miR156b-3p	2.80735	0.0173869
1	10888624	10888664	+	miR4221	2.80735	0.0150779
5	6351	6391	-	miR169g-3p	2.80735	0.0268995
1	539676	539716	+	miR5998a,miR5998b	2.80735	0.0342361
3	4676469	4676509	-	miR396a-5p,miR396b-5p	2.80735	0.0218508
4	12918896	12918936	+	miR864-3p	2.58496	0.0148122
1	17891518	17891558	-	miR168a-5p,miR168b-5p	2.58496	0.0320707
4	58400	58440	-	miR170-3p,miR171a-3p	2.58496	0.00141281
3	4742765	4742805	-	miR865-5p	2.58496	0.0260963
2	3362969	3363009	+	miR867	2.58496	0.0465295
1	23828996	23829036	-	miR835-5p	2.58496	0.0198921
5	20616068	20616108	-	miR157a-5p,miR157b-5p,miR157c-5p	2.32193	0.0109401
5	20582726	20582766	-	miR157a-5p,miR157b-5p,miR157c-5p	2.32193	0.0109401
1	3163861	3163901	+	miR2934-5p	2.32193	0.0258205
5	18671074	18671114	+	miR414	2.32193	0.00721006
5	9136184	9136224	+	miR156d-5p	2.32193	0.0329456
1	20430854	20430894	+	miR3440b-3p	2.32193	0.0384147
4	58403	58443	-	miR171b-3p,miR171c-3p	2.32193	0.0162415
1	26006720	26006760	+	miR156a-5p,miR156b-5p,miR156c-5p,miR156d-5p,miR156e,miR156f-5p,miR156g,miR156h,miR156i,miR156j,miR157d	2.32193	0.00677063
1	26006721	26006761	+	miR157a-5p,miR157b-5p,miR157c-5p	2.32193	0.00816926
3	22997622	22997662	-	miR5654-3p	2.32193	0.0419591
3	6428880	6428920	+	miR822-5p	2.32193	0.0283999
5	9789631	9789671	-	miR5657	2.25716	0.00142428
3	5063290	5063330	+	miR319a,miR319b,miR319c	2.16993	0.0147525
5	20582727	20582767	-	miR156a-5p,miR156b-5p,miR156c-5p,miR156d-5p,miR156e,miR156f-5p,miR156g,miR156h,miR156i,miR156j,miR157d	2.16993	0.00782629
5	20616069	20616109	-	miR156a-5p,miR156b-5p,miR156c-5p,miR156d-5p,miR156e,miR156f-5p,miR156g,miR156h,miR156i,miR156j,miR157d	2.16993	0.00782629
