# Supplementary material for: Nanopore direct RNA sequencing maps the complexity of Arabidopsis mRNA processing and m6A modification
Source: eLife. 2020 Jan 14;9:e49658. doi: 10.7554/eLife.49658 (PMC6959997; doi:10.7554/eLife.49658)
Supplement: Figure 3—source data 1. [file elife-49658-fig3-data1.tds]

#chrom	start	end	name	count	strand
1	3630	3631	tss	6	+
1	3673	3674	tss	1	+
1	8714	8715	tss	1	-
1	28499	28500	tss	2	+
1	33113	33114	tss	7	-
1	33116	33117	tss	6	-
1	33117	33118	tss	6	-
1	46812	46813	tss	6	-
1	49277	49278	tss	6	-
1	49278	49279	tss	1	-
1	51181	51182	tss	6	-
1	57782	57783	tss	2	-
1	59123	59124	tss	1	-
1	59166	59167	tss	6	-
1	67618	67619	tss	6	-
1	72418	72419	tss	6	+
1	74720	74721	tss	5	-
1	75601	75602	tss	1	+
1	88212	88213	tss	1	-
1	88897	88898	tss	4	+
1	97508	97509	tss	6	+
1	99921	99922	tss	6	+
1	99923	99924	tss	6	+
1	109031	109032	tss	5	+
1	109056	109057	tss	6	+
1	117048	117049	tss	5	+
1	118092	118093	tss	1	+
1	121367	121368	tss	2	-
1	123141	123142	tss	6	-
1	136156	136157	tss	5	+
1	137202	137203	tss	1	+
1	142095	142096	tss	1	+
1	143716	143717	tss	4	+
1	149805	149806	tss	6	-
1	155972	155973	tss	4	-
1	158654	158655	tss	5	-
1	163418	163419	tss	1	+
1	172885	172886	tss	6	-
1	176140	176141	tss	6	+
1	182308	182309	tss	6	-
1	185136	185137	tss	4	+
1	187211	187212	tss	6	+
1	195822	195823	tss	6	+
1	197869	197870	tss	2	+
1	199662	199663	tss	6	+
1	199674	199675	tss	6	+
1	219130	219131	tss	5	+
1	224302	224303	tss	6	-
1	227229	227230	tss	6	-
1	229477	229478	tss	6	+
1	232312	232313	tss	1	-
1	237753	237754	tss	1	-
1	245987	245988	tss	5	-
1	249140	249141	tss	1	+
1	262827	262828	tss	5	+
1	262871	262872	tss	1	+
1	266428	266429	tss	2	+
1	268329	268330	tss	1	+
1	268338	268339	tss	6	+
1	270966	270967	tss	6	+
1	275436	275437	tss	6	+
1	278614	278615	tss	6	+
1	278636	278637	tss	5	+
1	293367	293368	tss	6	+
1	298108	298109	tss	6	-
1	300843	300844	tss	6	-
1	303536	303537	tss	6	+
1	306281	306282	tss	5	-
1	310325	310326	tss	5	+
1	313935	313936	tss	2	-
1	315899	315900	tss	6	-
1	316186	316187	tss	1	+
1	320973	320974	tss	2	-
1	322856	322857	tss	5	-
1	323026	323027	tss	5	+
1	329339	329340	tss	1	+
1	338291	338292	tss	1	+
1	341972	341973	tss	2	-
1	344340	344341	tss	1	-
1	346475	346476	tss	1	+
1	347139	347140	tss	4	+
1	353724	353725	tss	2	-
1	354968	354969	tss	6	-
1	360055	360056	tss	1	+
1	365566	365567	tss	5	+
1	382539	382540	tss	5	+
1	389642	389643	tss	6	-
1	389833	389834	tss	6	+
1	391516	391517	tss	2	+
1	392830	392831	tss	2	+
1	395760	395761	tss	6	+
1	401842	401843	tss	6	-
1	404438	404439	tss	6	-
1	404603	404604	tss	1	+
1	408760	408761	tss	5	+
1	410784	410785	tss	6	+
1	414644	414645	tss	5	-
1	415078	415079	tss	4	+
1	418783	418784	tss	1	+
1	420530	420531	tss	1	+
1	446226	446227	tss	6	-
1	450412	450413	tss	6	-
1	450414	450415	tss	6	-
1	452699	452700	tss	2	-
1	452722	452723	tss	4	-
1	453184	453185	tss	2	+
1	455709	455710	tss	6	+
1	455777	455778	tss	6	+
1	460695	460696	tss	6	-
1	463609	463610	tss	6	-
1	464923	464924	tss	9	-
1	467386	467387	tss	5	-
1	473139	473140	tss	1	-
1	474500	474501	tss	6	+
1	476999	477000	tss	5	+
1	480853	480854	tss	6	+
1	486900	486901	tss	1	+
1	488945	488946	tss	2	+
1	490504	490505	tss	2	-
1	490874	490875	tss	5	+
1	496037	496038	tss	1	-
1	498515	498516	tss	5	-
1	515342	515343	tss	6	-
1	515371	515372	tss	4	-
1	518253	518254	tss	17	+
1	518255	518256	tss	1	+
1	529794	529795	tss	1	+
1	539606	539607	tss	1	-
1	562423	562424	tss	2	-
1	564204	564205	tss	6	+
1	574980	574981	tss	6	-
1	580624	580625	tss	8	+
1	580645	580646	tss	2	+
1	580656	580657	tss	4	+
1	584259	584260	tss	6	+
1	588328	588329	tss	6	+
1	591825	591826	tss	5	+
1	592070	592071	tss	5	+
1	592473	592474	tss	1	-
1	598656	598657	tss	1	-
1	602563	602564	tss	5	+
1	606658	606659	tss	4	-
1	606692	606693	tss	4	-
1	609433	609434	tss	12	-
1	611098	611099	tss	1	-
1	612293	612294	tss	11	-
1	616187	616188	tss	1	-
1	618264	618265	tss	1	+
1	621460	621461	tss	6	+
1	624473	624474	tss	4	-
1	626744	626745	tss	5	+
1	626787	626788	tss	5	+
1	630511	630512	tss	6	+
1	630514	630515	tss	6	+
1	632569	632570	tss	2	+
1	635283	635284	tss	1	+
1	638676	638677	tss	5	-
1	644520	644521	tss	6	-
1	659769	659770	tss	6	-
1	662265	662266	tss	6	-
1	666451	666452	tss	4	-
1	669804	669805	tss	5	-
1	679820	679821	tss	5	+
1	687314	687315	tss	6	-
1	692559	692560	tss	6	-
1	701529	701530	tss	1	+
1	706630	706631	tss	6	-
1	711802	711803	tss	6	-
1	712984	712985	tss	5	-
1	729934	729935	tss	4	+
1	739686	739687	tss	6	+
1	749042	749043	tss	5	-
1	749246	749247	tss	6	+
1	754172	754173	tss	6	-
1	756302	756303	tss	6	-
1	756417	756418	tss	6	+
1	761288	761289	tss	5	+
1	769634	769635	tss	5	+
1	775526	775527	tss	6	+
1	782939	782940	tss	6	+
1	787123	787124	tss	6	+
1	795332	795333	tss	5	-
1	803067	803068	tss	6	+
1	813478	813479	tss	5	+
1	824358	824359	tss	6	-
1	824536	824537	tss	4	+
1	830821	830822	tss	5	+
1	835825	835826	tss	5	+
1	838965	838966	tss	2	+
1	844165	844166	tss	6	-
1	846824	846825	tss	6	+
1	847712	847713	tss	1	-
1	847874	847875	tss	8	+
1	847912	847913	tss	4	+
1	852365	852366	tss	1	+
1	864047	864048	tss	5	-
1	866305	866306	tss	4	-
1	870944	870945	tss	6	-
1	873488	873489	tss	2	+
1	875840	875841	tss	1	-
1	879820	879821	tss	6	-
1	883390	883391	tss	1	-
1	889511	889512	tss	1	-
1	892354	892355	tss	1	-
1	893005	893006	tss	5	+
1	898903	898904	tss	6	+
1	898915	898916	tss	6	+
1	901051	901052	tss	6	+
1	907656	907657	tss	7	+
1	911192	911193	tss	5	-
1	917917	917918	tss	5	-
1	920950	920951	tss	6	+
1	933708	933709	tss	6	+
1	943376	943377	tss	5	-
1	944594	944595	tss	1	+
1	951781	951782	tss	2	-
1	954524	954525	tss	5	+
1	960727	960728	tss	8	-
1	962358	962359	tss	5	-
1	970129	970130	tss	1	-
1	977758	977759	tss	1	-
1	977760	977761	tss	7	-
1	981870	981871	tss	6	-
1	983403	983404	tss	1	-
1	985755	985756	tss	5	+
1	987109	987110	tss	2	+
1	987918	987919	tss	2	+
1	989212	989213	tss	6	+
1	990690	990691	tss	1	+
1	990697	990698	tss	3	+
1	991138	991139	tss	4	+
1	991178	991179	tss	4	+
1	991196	991197	tss	4	+
1	991218	991219	tss	6	+
1	991220	991221	tss	4	+
1	1004768	1004769	tss	6	+
1	1005098	1005099	tss	6	+
1	1008510	1008511	tss	1	+
1	1010897	1010898	tss	2	-
1	1013359	1013360	tss	6	-
1	1013714	1013715	tss	5	+
1	1018106	1018107	tss	1	+
1	1029118	1029119	tss	5	-
1	1043861	1043862	tss	6	-
1	1051167	1051168	tss	4	-
1	1051379	1051380	tss	6	+
1	1065174	1065175	tss	2	-
1	1070926	1070927	tss	1	-
1	1073428	1073429	tss	6	+
1	1079329	1079330	tss	1	-
1	1080627	1080628	tss	6	-
1	1096946	1096947	tss	5	+
1	1108707	1108708	tss	6	-
1	1109489	1109490	tss	5	+
1	1114404	1114405	tss	5	+
1	1120445	1120446	tss	2	-
1	1122469	1122470	tss	6	-
1	1125571	1125572	tss	6	+
1	1126272	1126273	tss	2	+
1	1129414	1129415	tss	6	-
1	1136299	1136300	tss	6	+
1	1137481	1137482	tss	2	+
1	1141358	1141359	tss	6	-
1	1143050	1143051	tss	6	-
1	1146653	1146654	tss	1	-
1	1148450	1148451	tss	6	-
1	1154597	1154598	tss	1	-
1	1157710	1157711	tss	1	-
1	1164850	1164851	tss	6	-
1	1165212	1165213	tss	1	+
1	1165244	1165245	tss	5	+
1	1165278	1165279	tss	6	+
1	1168877	1168878	tss	5	-
1	1178406	1178407	tss	4	-
1	1183700	1183701	tss	1	-
1	1186106	1186107	tss	2	-
1	1188256	1188257	tss	4	-
1	1191348	1191349	tss	12	-
1	1191612	1191613	tss	6	+
1	1193481	1193482	tss	2	+
1	1198223	1198224	tss	6	+
1	1198260	1198261	tss	6	+
1	1200244	1200245	tss	2	+
1	1202281	1202282	tss	5	+
1	1214661	1214662	tss	2	-
1	1216097	1216098	tss	6	+
1	1220136	1220137	tss	3	-
1	1222857	1222858	tss	5	-
1	1226587	1226588	tss	6	+
1	1227812	1227813	tss	2	+
1	1230063	1230064	tss	2	+
1	1235949	1235950	tss	6	-
1	1240440	1240441	tss	6	+
1	1244993	1244994	tss	6	+
1	1248774	1248775	tss	5	-
1	1261423	1261424	tss	6	-
1	1279387	1279388	tss	1	+
1	1286559	1286560	tss	5	-
1	1286583	1286584	tss	5	-
1	1291077	1291078	tss	10	-
1	1292108	1292109	tss	6	+
1	1301364	1301365	tss	4	-
1	1307862	1307863	tss	6	-
1	1307881	1307882	tss	6	-
1	1313610	1313611	tss	6	+
1	1315307	1315308	tss	2	+
1	1321908	1321909	tss	5	+
1	1333468	1333469	tss	4	-
1	1333501	1333502	tss	4	-
1	1333510	1333511	tss	6	-
1	1333511	1333512	tss	8	-
1	1333517	1333518	tss	4	-
1	1333519	1333520	tss	4	-
1	1333529	1333530	tss	4	-
1	1333531	1333532	tss	4	-
1	1333532	1333533	tss	28	-
1	1333566	1333567	tss	4	-
1	1337837	1337838	tss	1	-
1	1337838	1337839	tss	5	-
1	1343546	1343547	tss	4	-
1	1343583	1343584	tss	5	-
1	1345066	1345067	tss	6	+
1	1348870	1348871	tss	1	-
1	1350179	1350180	tss	5	+
1	1356529	1356530	tss	2	-
1	1356590	1356591	tss	2	-
1	1358374	1358375	tss	7	-
1	1361980	1361981	tss	5	-
1	1368738	1368739	tss	6	-
1	1373097	1373098	tss	6	-
1	1375709	1375710	tss	6	-
1	1375739	1375740	tss	6	-
1	1383865	1383866	tss	6	+
1	1388346	1388347	tss	2	-
1	1391177	1391178	tss	6	-
1	1395863	1395864	tss	6	-
1	1398969	1398970	tss	5	-
1	1399235	1399236	tss	5	+
1	1400907	1400908	tss	1	+
1	1407458	1407459	tss	6	-
1	1410752	1410753	tss	6	-
1	1411169	1411170	tss	5	+
1	1416111	1416112	tss	5	-
1	1418438	1418439	tss	5	-
1	1421639	1421640	tss	6	-
1	1421641	1421642	tss	2	-
1	1425592	1425593	tss	1	+
1	1432763	1432764	tss	6	-
1	1435285	1435286	tss	5	+
1	1437359	1437360	tss	5	-
1	1441439	1441440	tss	1	-
1	1449827	1449828	tss	1	-
1	1450855	1450856	tss	1	-
1	1452868	1452869	tss	1	-
1	1458680	1458681	tss	6	-
1	1463110	1463111	tss	6	+
1	1469609	1469610	tss	10	+
1	1478696	1478697	tss	1	-
1	1482591	1482592	tss	6	+
1	1482633	1482634	tss	11	+
1	1486931	1486932	tss	1	-
1	1490936	1490937	tss	1	-
1	1494218	1494219	tss	6	-
1	1501812	1501813	tss	6	-
1	1503785	1503786	tss	6	-
1	1505316	1505317	tss	5	+
1	1510411	1510412	tss	1	+
1	1517245	1517246	tss	6	-
1	1521136	1521137	tss	13	+
1	1527233	1527234	tss	13	-
1	1529771	1529772	tss	1	+
1	1534389	1534390	tss	9	-
1	1547099	1547100	tss	1	+
1	1547848	1547849	tss	4	-
1	1553602	1553603	tss	2	+
1	1559755	1559756	tss	7	-
1	1565236	1565237	tss	1	+
1	1576862	1576863	tss	1	+
1	1578784	1578785	tss	6	+
1	1583670	1583671	tss	5	-
1	1583717	1583718	tss	6	-
1	1587648	1587649	tss	6	-
1	1587720	1587721	tss	6	-
1	1595817	1595818	tss	5	-
1	1605026	1605027	tss	5	-
1	1623450	1623451	tss	1	-
1	1624974	1624975	tss	5	+
1	1625008	1625009	tss	1	+
1	1629449	1629450	tss	1	+
1	1629475	1629476	tss	6	+
1	1635710	1635711	tss	6	-
1	1647146	1647147	tss	6	-
1	1651117	1651118	tss	1	-
1	1662176	1662177	tss	5	-
1	1668899	1668900	tss	6	-
1	1669349	1669350	tss	1	+
1	1679188	1679189	tss	5	+
1	1701024	1701025	tss	1	-
1	1715049	1715050	tss	6	+
1	1715053	1715054	tss	1	+
1	1718852	1718853	tss	5	-
1	1721508	1721509	tss	1	+
1	1721511	1721512	tss	2	+
1	1724485	1724486	tss	6	-
1	1730248	1730249	tss	5	+
1	1730285	1730286	tss	1	+
1	1732870	1732871	tss	1	+
1	1744779	1744780	tss	6	+
1	1748356	1748357	tss	6	+
1	1754243	1754244	tss	1	+
1	1762225	1762226	tss	6	+
1	1766274	1766275	tss	5	-
1	1768662	1768663	tss	6	-
1	1769013	1769014	tss	4	+
1	1773017	1773018	tss	5	-
1	1775641	1775642	tss	2	+
1	1779358	1779359	tss	5	+
1	1786872	1786873	tss	6	+
1	1790223	1790224	tss	6	+
1	1803975	1803976	tss	6	-
1	1815463	1815464	tss	6	-
1	1817281	1817282	tss	1	-
1	1821891	1821892	tss	1	-
1	1821892	1821893	tss	5	-
1	1822617	1822618	tss	4	+
1	1829848	1829849	tss	6	-
1	1832982	1832983	tss	1	+
1	1837559	1837560	tss	1	-
1	1843569	1843570	tss	5	+
1	1855003	1855004	tss	6	-
1	1855021	1855022	tss	5	-
1	1855942	1855943	tss	5	+
1	1860647	1860648	tss	5	-
1	1860650	1860651	tss	1	-
1	1868872	1868873	tss	2	-
1	1883003	1883004	tss	1	+
1	1886896	1886897	tss	5	-
1	1894137	1894138	tss	6	-
1	1896934	1896935	tss	6	-
1	1897208	1897209	tss	6	+
1	1899963	1899964	tss	2	+
1	1902653	1902654	tss	2	+
1	1911175	1911176	tss	6	+
1	1917652	1917653	tss	1	-
1	1917660	1917661	tss	5	-
1	1919746	1919747	tss	6	-
1	1922351	1922352	tss	9	+
1	1936816	1936817	tss	4	-
1	1944932	1944933	tss	5	-
1	1946816	1946817	tss	6	+
1	1952726	1952727	tss	6	-
1	1957085	1957086	tss	1	+
1	1961973	1961974	tss	6	-
1	1964981	1964982	tss	1	-
1	1965841	1965842	tss	5	+
1	1969485	1969486	tss	6	-
1	1969728	1969729	tss	5	+
1	1972732	1972733	tss	2	+
1	1974302	1974303	tss	2	-
1	1980225	1980226	tss	1	+
1	1989478	1989479	tss	6	+
1	1992384	1992385	tss	5	+
1	1996107	1996108	tss	1	-
1	2007055	2007056	tss	2	-
1	2007629	2007630	tss	1	+
1	2013506	2013507	tss	6	-
1	2013511	2013512	tss	6	-
1	2013544	2013545	tss	5	-
1	2016053	2016054	tss	1	-
1	2019750	2019751	tss	1	-
1	2024661	2024662	tss	4	-
1	2025600	2025601	tss	1	+
1	2032344	2032345	tss	7	+
1	2035883	2035884	tss	6	+
1	2047882	2047883	tss	5	+
1	2047884	2047885	tss	12	+
1	2049085	2049086	tss	2	+
1	2052059	2052060	tss	6	-
1	2055250	2055251	tss	6	-
1	2062935	2062936	tss	6	-
1	2067528	2067529	tss	6	+
1	2070735	2070736	tss	2	+
1	2077693	2077694	tss	10	-
1	2077697	2077698	tss	6	-
1	2081938	2081939	tss	6	-
1	2083423	2083424	tss	6	+
1	2087231	2087232	tss	6	+
1	2091464	2091465	tss	5	-
1	2091685	2091686	tss	6	-
1	2095112	2095113	tss	3	-
1	2097150	2097151	tss	6	+
1	2105079	2105080	tss	6	+
1	2110628	2110629	tss	1	+
1	2114533	2114534	tss	6	-
1	2120744	2120745	tss	1	-
1	2131000	2131001	tss	1	-
1	2135652	2135653	tss	5	-
1	2135664	2135665	tss	5	-
1	2135850	2135851	tss	6	+
1	2143764	2143765	tss	5	-
1	2150990	2150991	tss	2	-
1	2152314	2152315	tss	6	-
1	2152886	2152887	tss	6	+
1	2152938	2152939	tss	5	+
1	2156007	2156008	tss	5	-
1	2160753	2160754	tss	5	-
1	2163118	2163119	tss	1	-
1	2163189	2163190	tss	5	-
1	2165179	2165180	tss	4	-
1	2168596	2168597	tss	5	+
1	2170039	2170040	tss	6	+
1	2174866	2174867	tss	5	-
1	2182116	2182117	tss	5	-
1	2187882	2187883	tss	5	+
1	2190592	2190593	tss	6	-
1	2190655	2190656	tss	4	-
1	2190656	2190657	tss	12	-
1	2190658	2190659	tss	28	-
1	2193777	2193778	tss	6	-
1	2193779	2193780	tss	6	-
1	2195795	2195796	tss	1	-
1	2200158	2200159	tss	4	+
1	2204319	2204320	tss	5	+
1	2210843	2210844	tss	5	-
1	2212545	2212546	tss	1	-
1	2215235	2215236	tss	1	+
1	2216473	2216474	tss	2	+
1	2219473	2219474	tss	2	-
1	2222981	2222982	tss	5	-
1	2223868	2223869	tss	6	+
1	2225044	2225045	tss	1	-
1	2226013	2226014	tss	6	+
1	2229216	2229217	tss	1	-
1	2238141	2238142	tss	6	+
1	2248960	2248961	tss	6	-
1	2249137	2249138	tss	1	+
1	2249140	2249141	tss	6	+
1	2260081	2260082	tss	6	-
1	2260088	2260089	tss	6	-
1	2262846	2262847	tss	6	-
1	2263153	2263154	tss	6	+
1	2270335	2270336	tss	1	+
1	2275060	2275061	tss	5	+
1	2277838	2277839	tss	5	+
1	2282788	2282789	tss	3	-
1	2282827	2282828	tss	6	-
1	2287673	2287674	tss	6	-
1	2291457	2291458	tss	6	+
1	2291471	2291472	tss	6	+
1	2291475	2291476	tss	6	+
1	2299469	2299470	tss	6	-
1	2301377	2301378	tss	4	+
1	2302020	2302021	tss	5	-
1	2305377	2305378	tss	6	+
1	2308465	2308466	tss	1	+
1	2333289	2333290	tss	5	-
1	2339382	2339383	tss	6	-
1	2339384	2339385	tss	13	-
1	2341541	2341542	tss	6	+
1	2346841	2346842	tss	4	-
1	2349096	2349097	tss	6	+
1	2355751	2355752	tss	6	-
1	2360163	2360164	tss	2	-
1	2366402	2366403	tss	1	-
1	2366560	2366561	tss	6	-
1	2368384	2368385	tss	5	-
1	2368836	2368837	tss	8	+
1	2368958	2368959	tss	4	+
1	2371706	2371707	tss	5	-
1	2371713	2371714	tss	5	+
1	2379694	2379695	tss	1	+
1	2379737	2379738	tss	6	+
1	2381648	2381649	tss	1	+
1	2386515	2386516	tss	1	-
1	2392452	2392453	tss	12	-
1	2395438	2395439	tss	1	+
1	2396207	2396208	tss	1	-
1	2400507	2400508	tss	10	-
1	2402856	2402857	tss	6	-
1	2405941	2405942	tss	6	-
1	2407606	2407607	tss	1	+
1	2409537	2409538	tss	6	-
1	2409542	2409543	tss	6	-
1	2409543	2409544	tss	6	-
1	2411954	2411955	tss	1	-
1	2412666	2412667	tss	6	-
1	2413000	2413001	tss	6	+
1	2416264	2416265	tss	1	+
1	2419154	2419155	tss	5	-
1	2421938	2421939	tss	1	-
1	2422297	2422298	tss	6	+
1	2424063	2424064	tss	6	+
1	2432020	2432021	tss	6	-
1	2437477	2437478	tss	12	+
1	2437486	2437487	tss	1	+
1	2444051	2444052	tss	11	+
1	2444065	2444066	tss	1	+
1	2445469	2445470	tss	1	+
1	2446086	2446087	tss	1	+
1	2451252	2451253	tss	1	+
1	2454886	2454887	tss	6	+
1	2456631	2456632	tss	2	+
1	2458272	2458273	tss	6	+
1	2458276	2458277	tss	21	+
1	2458282	2458283	tss	6	+
1	2460455	2460456	tss	1	+
1	2463633	2463634	tss	1	-
1	2464815	2464816	tss	16	-
1	2465444	2465445	tss	6	-
1	2465459	2465460	tss	1	-
1	2465466	2465467	tss	11	-
1	2466988	2466989	tss	5	-
1	2467160	2467161	tss	5	+
1	2472627	2472628	tss	1	-
1	2474910	2474911	tss	2	-
1	2475404	2475405	tss	1	+
1	2477157	2477158	tss	4	+
1	2477171	2477172	tss	1	+
1	2485015	2485016	tss	6	-
1	2488005	2488006	tss	1	-
1	2498609	2498610	tss	6	-
1	2501390	2501391	tss	5	-
1	2502787	2502788	tss	5	-
1	2535353	2535354	tss	5	+
1	2542334	2542335	tss	5	-
1	2545984	2545985	tss	2	-
1	2547942	2547943	tss	5	-
1	2555160	2555161	tss	15	-
1	2560402	2560403	tss	6	-
1	2565120	2565121	tss	1	-
1	2567501	2567502	tss	1	+
1	2572219	2572220	tss	2	+
1	2576692	2576693	tss	6	-
1	2580668	2580669	tss	6	-
1	2583321	2583322	tss	1	-
1	2590248	2590249	tss	6	-
1	2608102	2608103	tss	1	+
1	2613238	2613239	tss	5	-
1	2621495	2621496	tss	1	-
1	2625862	2625863	tss	2	-
1	2627840	2627841	tss	1	-
1	2631067	2631068	tss	1	+
1	2635841	2635842	tss	6	-
1	2636033	2636034	tss	6	+
1	2641762	2641763	tss	11	-
1	2642287	2642288	tss	1	+
1	2646034	2646035	tss	5	-
1	2646188	2646189	tss	1	+
1	2651745	2651746	tss	1	+
1	2668760	2668761	tss	2	-
1	2670260	2670261	tss	1	-
1	2671824	2671825	tss	11	-
1	2672462	2672463	tss	6	+
1	2672637	2672638	tss	6	+
1	2675844	2675845	tss	5	+
1	2684015	2684016	tss	6	-
1	2684087	2684088	tss	6	-
1	2684288	2684289	tss	6	+
1	2688588	2688589	tss	5	-
1	2689067	2689068	tss	6	+
1	2694168	2694169	tss	6	-
1	2694370	2694371	tss	6	-
1	2696411	2696412	tss	5	+
1	2696479	2696480	tss	6	+
1	2696486	2696487	tss	6	+
1	2696496	2696497	tss	1	+
1	2701225	2701226	tss	1	+
1	2703392	2703393	tss	5	+
1	2707186	2707187	tss	6	+
1	2710908	2710909	tss	6	-
1	2712926	2712927	tss	6	+
1	2718803	2718804	tss	5	+
1	2746745	2746746	tss	1	-
1	2747962	2747963	tss	6	-
1	2751208	2751209	tss	11	-
1	2752155	2752156	tss	6	+
1	2759762	2759763	tss	6	-
1	2761572	2761573	tss	1	-
1	2762605	2762606	tss	6	+
1	2762642	2762643	tss	4	+
1	2770260	2770261	tss	1	-
1	2771476	2771477	tss	6	-
1	2771711	2771712	tss	6	+
1	2801077	2801078	tss	5	+
1	2805370	2805371	tss	5	+
1	2808898	2808899	tss	1	+
1	2811188	2811189	tss	1	-
1	2817638	2817639	tss	5	-
1	2820347	2820348	tss	5	-
1	2822435	2822436	tss	6	-
1	2827117	2827118	tss	6	+
1	2839143	2839144	tss	5	+
1	2847777	2847778	tss	6	-
1	2848349	2848350	tss	1	+
1	2852453	2852454	tss	6	+
1	2867270	2867271	tss	6	+
1	2873489	2873490	tss	4	+
1	2873546	2873547	tss	1	+
1	2879641	2879642	tss	2	+
1	2882530	2882531	tss	5	+
1	2884424	2884425	tss	6	+
1	2887286	2887287	tss	5	+
1	2891036	2891037	tss	5	+
1	2899381	2899382	tss	6	-
1	2904814	2904815	tss	6	-
1	2922994	2922995	tss	1	-
1	2925755	2925756	tss	1	-
1	2927702	2927703	tss	6	+
1	2932738	2932739	tss	4	+
1	2939286	2939287	tss	12	-
1	2942173	2942174	tss	4	-
1	2942252	2942253	tss	8	-
1	2942253	2942254	tss	18	-
1	2942254	2942255	tss	12	-
1	2942257	2942258	tss	4	-
1	2942258	2942259	tss	8	-
1	2942266	2942267	tss	4	-
1	2945426	2945427	tss	6	-
1	2946280	2946281	tss	5	+
1	2955602	2955603	tss	6	-
1	2967717	2967718	tss	5	-
1	2972198	2972199	tss	1	-
1	2976695	2976696	tss	6	-
1	2979486	2979487	tss	10	-
1	2979595	2979596	tss	4	-
1	2982623	2982624	tss	5	-
1	2984882	2984883	tss	5	+
1	2987392	2987393	tss	5	-
1	2989382	2989383	tss	1	+
1	2994368	2994369	tss	6	+
1	2994409	2994410	tss	5	+
1	2994413	2994414	tss	6	+
1	3001293	3001294	tss	6	-
1	3003714	3003715	tss	6	-
1	3003925	3003926	tss	5	+
1	3009056	3009057	tss	6	+
1	3012362	3012363	tss	4	-
1	3015016	3015017	tss	1	-
1	3015398	3015399	tss	6	+
1	3015455	3015456	tss	6	+
1	3015460	3015461	tss	6	+
1	3019818	3019819	tss	6	+
1	3029487	3029488	tss	5	-
1	3031227	3031228	tss	5	+
1	3034417	3034418	tss	5	-
1	3035384	3035385	tss	2	+
1	3038313	3038314	tss	6	-
1	3038407	3038408	tss	4	-
1	3041803	3041804	tss	6	-
1	3041816	3041817	tss	1	-
1	3042103	3042104	tss	5	+
1	3049038	3049039	tss	5	+
1	3063396	3063397	tss	1	-
1	3064160	3064161	tss	6	+
1	3066752	3066753	tss	12	+
1	3066755	3066756	tss	6	+
1	3072046	3072047	tss	1	-
1	3072049	3072050	tss	6	-
1	3076715	3076716	tss	5	+
1	3086160	3086161	tss	6	+
1	3093844	3093845	tss	6	+
1	3100265	3100266	tss	6	-
1	3102924	3102925	tss	6	-
1	3106534	3106535	tss	11	+
1	3115047	3115048	tss	2	-
1	3116683	3116684	tss	6	-
1	3119615	3119616	tss	6	-
1	3120785	3120786	tss	6	+
1	3121568	3121569	tss	2	+
1	3122955	3122956	tss	2	+
1	3125806	3125807	tss	1	+
1	3130978	3130979	tss	5	-
1	3131022	3131023	tss	4	-
1	3131034	3131035	tss	4	-
1	3131037	3131038	tss	8	-
1	3131093	3131094	tss	4	-
1	3137470	3137471	tss	6	-
1	3140233	3140234	tss	6	-
1	3140892	3140893	tss	6	+
1	3151505	3151506	tss	4	-
1	3154531	3154532	tss	1	+
1	3157761	3157762	tss	6	+
1	3161654	3161655	tss	6	-
1	3161840	3161841	tss	5	+
1	3167868	3167869	tss	22	-
1	3173547	3173548	tss	10	+
1	3180323	3180324	tss	8	-
1	3184188	3184189	tss	2	-
1	3184220	3184221	tss	1	-
1	3194984	3194985	tss	6	-
1	3200245	3200246	tss	5	-
1	3201827	3201828	tss	1	+
1	3205772	3205773	tss	6	+
1	3205804	3205805	tss	6	+
1	3224494	3224495	tss	5	-
1	3224540	3224541	tss	6	-
1	3227065	3227066	tss	5	-
1	3233104	3233105	tss	5	-
1	3239553	3239554	tss	1	-
1	3241573	3241574	tss	1	-
1	3244212	3244213	tss	6	+
1	3252259	3252260	tss	11	+
1	3254294	3254295	tss	2	+
1	3255210	3255211	tss	2	+
1	3261529	3261530	tss	1	-
1	3261534	3261535	tss	4	-
1	3261572	3261573	tss	6	-
1	3263579	3263580	tss	2	-
1	3263918	3263919	tss	5	+
1	3271964	3271965	tss	1	-
1	3273881	3273882	tss	1	+
1	3278527	3278528	tss	1	-
1	3284238	3284239	tss	6	+
1	3288089	3288090	tss	6	+
1	3289623	3289624	tss	2	+
1	3296108	3296109	tss	6	-
1	3296193	3296194	tss	4	-
1	3296197	3296198	tss	8	-
1	3305827	3305828	tss	1	-
1	3306188	3306189	tss	2	-
1	3306823	3306824	tss	1	-
1	3310929	3310930	tss	1	+
1	3323561	3323562	tss	1	-
1	3325965	3325966	tss	1	+
1	3328970	3328971	tss	1	+
1	3339156	3339157	tss	2	-
1	3341570	3341571	tss	6	-
1	3345625	3345626	tss	6	-
1	3347813	3347814	tss	6	-
1	3349254	3349255	tss	6	+
1	3354242	3354243	tss	2	+
1	3355588	3355589	tss	5	+
1	3359837	3359838	tss	6	-
1	3369094	3369095	tss	5	-
1	3370560	3370561	tss	1	+
1	3375461	3375462	tss	2	+
1	3383905	3383906	tss	4	-
1	3388396	3388397	tss	1	-
1	3392523	3392524	tss	6	-
1	3395009	3395010	tss	6	-
1	3396850	3396851	tss	5	-
1	3398357	3398358	tss	5	-
1	3400610	3400611	tss	4	+
1	3400659	3400660	tss	6	+
1	3412777	3412778	tss	1	-
1	3412842	3412843	tss	5	-
1	3416283	3416284	tss	5	-
1	3419638	3419639	tss	5	-
1	3430632	3430633	tss	6	-
1	3439791	3439792	tss	5	+
1	3443815	3443816	tss	1	-
1	3453227	3453228	tss	1	+
1	3461367	3461368	tss	1	-
1	3461638	3461639	tss	6	+
1	3472671	3472672	tss	1	-
1	3477773	3477774	tss	6	-
1	3485936	3485937	tss	3	+
1	3487593	3487594	tss	5	+
1	3493710	3493711	tss	1	-
1	3493735	3493736	tss	6	-
1	3495134	3495135	tss	6	-
1	3503425	3503426	tss	6	-
1	3503431	3503432	tss	6	-
1	3503723	3503724	tss	4	+
1	3506185	3506186	tss	1	+
1	3514722	3514723	tss	1	-
1	3516972	3516973	tss	6	-
1	3526144	3526145	tss	5	-
1	3526345	3526346	tss	2	-
1	3530466	3530467	tss	1	+
1	3532427	3532428	tss	6	+
1	3535529	3535530	tss	5	+
1	3535532	3535533	tss	6	+
1	3537169	3537170	tss	1	+
1	3545470	3545471	tss	7	-
1	3554114	3554115	tss	6	+
1	3562952	3562953	tss	6	+
1	3570759	3570760	tss	5	-
1	3578473	3578474	tss	5	-
1	3581798	3581799	tss	6	-
1	3582035	3582036	tss	6	-
1	3586073	3586074	tss	1	-
1	3592210	3592211	tss	5	-
1	3599270	3599271	tss	8	+
1	3605073	3605074	tss	5	-
1	3607458	3607459	tss	2	-
1	3610392	3610393	tss	5	-
1	3610449	3610450	tss	6	-
1	3611747	3611748	tss	5	+
1	3611749	3611750	tss	3	+
1	3611806	3611807	tss	4	+
1	3611858	3611859	tss	12	+
1	3611960	3611961	tss	6	+
1	3612199	3612200	tss	2	+
1	3616152	3616153	tss	5	-
1	3623709	3623710	tss	1	-
1	3627081	3627082	tss	1	-
1	3627689	3627690	tss	5	+
1	3627753	3627754	tss	1	+
1	3637140	3637141	tss	6	-
1	3639877	3639878	tss	1	+
1	3647767	3647768	tss	6	-
1	3655582	3655583	tss	5	-
1	3656145	3656146	tss	2	-
1	3658576	3658577	tss	5	-
1	3659215	3659216	tss	6	+
1	3659238	3659239	tss	6	+
1	3659262	3659263	tss	6	+
1	3661138	3661139	tss	6	+
1	3662765	3662766	tss	1	+
1	3664385	3664386	tss	6	+
1	3667126	3667127	tss	2	-
1	3670415	3670416	tss	1	+
1	3671153	3671154	tss	5	-
1	3675978	3675979	tss	1	-
1	3676759	3676760	tss	4	+
1	3676891	3676892	tss	5	+
1	3681887	3681888	tss	5	+
1	3683053	3683054	tss	2	+
1	3684734	3684735	tss	1	+
1	3697804	3697805	tss	5	-
1	3702631	3702632	tss	5	+
1	3710207	3710208	tss	5	+
1	3722856	3722857	tss	5	+
1	3722907	3722908	tss	1	+
1	3740817	3740818	tss	6	+
1	3744938	3744939	tss	1	+
1	3752779	3752780	tss	6	-
1	3756997	3756998	tss	6	-
1	3768262	3768263	tss	6	-
1	3777329	3777330	tss	6	+
1	3777347	3777348	tss	5	+
1	3779844	3779845	tss	2	+
1	3786987	3786988	tss	4	-
1	3790701	3790702	tss	6	-
1	3790811	3790812	tss	6	-
1	3801303	3801304	tss	2	-
1	3804030	3804031	tss	6	-
1	3804184	3804185	tss	1	-
1	3807135	3807136	tss	4	+
1	3811075	3811076	tss	1	+
1	3822620	3822621	tss	6	-
1	3822946	3822947	tss	5	-
1	3837477	3837478	tss	1	-
1	3837628	3837629	tss	1	-
1	3837859	3837860	tss	5	+
1	3847265	3847266	tss	5	+
1	3849359	3849360	tss	5	+
1	3853242	3853243	tss	1	+
1	3862437	3862438	tss	11	+
1	3862468	3862469	tss	1	+
1	3866919	3866920	tss	5	-
1	3866922	3866923	tss	6	-
1	3870773	3870774	tss	5	+
1	3874489	3874490	tss	4	+
1	3880355	3880356	tss	1	-
1	3880359	3880360	tss	1	-
1	3888689	3888690	tss	6	+
1	3888694	3888695	tss	6	+
1	3892579	3892580	tss	5	+
1	3902016	3902017	tss	1	+
1	3914406	3914407	tss	6	-
1	3914802	3914803	tss	5	+
1	3919271	3919272	tss	1	+
1	3930427	3930428	tss	2	-
1	3931575	3931576	tss	5	-
1	3938521	3938522	tss	12	+
1	3945736	3945737	tss	1	+
1	3948713	3948714	tss	5	+
1	3962253	3962254	tss	1	+
1	3963692	3963693	tss	5	-
1	3967547	3967548	tss	1	+
1	3971755	3971756	tss	5	-
1	3973280	3973281	tss	1	-
1	3973874	3973875	tss	5	+
1	3976838	3976839	tss	5	+
1	3980955	3980956	tss	2	-
1	3981247	3981248	tss	6	+
1	3987289	3987290	tss	5	-
1	3993459	3993460	tss	5	-
1	3995411	3995412	tss	18	+
1	3999201	3999202	tss	6	+
1	4001352	4001353	tss	5	+
1	4003845	4003846	tss	5	+
1	4003876	4003877	tss	6	+
1	4010808	4010809	tss	6	+
1	4014852	4014853	tss	5	+
1	4017843	4017844	tss	2	-
1	4018388	4018389	tss	2	-
1	4020917	4020918	tss	18	-
1	4021824	4021825	tss	6	+
1	4028745	4028746	tss	6	+
1	4034077	4034078	tss	5	-
1	4043879	4043880	tss	6	-
1	4053834	4053835	tss	6	-
1	4056206	4056207	tss	6	+
1	4063336	4063337	tss	7	-
1	4066340	4066341	tss	4	-
1	4072792	4072793	tss	6	+
1	4084206	4084207	tss	5	+
1	4090644	4090645	tss	6	-
1	4090646	4090647	tss	5	-
1	4105236	4105237	tss	5	+
1	4116243	4116244	tss	6	-
1	4117593	4117594	tss	6	-
1	4127836	4127837	tss	1	+
1	4137532	4137533	tss	5	+
1	4137881	4137882	tss	1	+
1	4144934	4144935	tss	2	+
1	4148039	4148040	tss	5	+
1	4149105	4149106	tss	2	+
1	4153661	4153662	tss	6	+
1	4156417	4156418	tss	5	+
1	4159269	4159270	tss	6	+
1	4172074	4172075	tss	6	+
1	4186123	4186124	tss	1	-
1	4188055	4188056	tss	6	-
1	4189354	4189355	tss	6	+
1	4196147	4196148	tss	4	+
1	4198412	4198413	tss	5	+
1	4200875	4200876	tss	1	+
1	4208950	4208951	tss	6	-
1	4217129	4217130	tss	1	-
1	4220193	4220194	tss	1	+
1	4223040	4223041	tss	6	+
1	4223051	4223052	tss	6	+
1	4229127	4229128	tss	1	-
1	4242988	4242989	tss	1	-
1	4244313	4244314	tss	2	+
1	4247248	4247249	tss	5	+
1	4259299	4259300	tss	6	-
1	4265015	4265016	tss	5	-
1	4268891	4268892	tss	6	-
1	4268900	4268901	tss	4	-
1	4268901	4268902	tss	2	-
1	4268903	4268904	tss	4	-
1	4274593	4274594	tss	2	+
1	4280861	4280862	tss	6	-
1	4282898	4282899	tss	6	+
1	4291016	4291017	tss	1	-
1	4297083	4297084	tss	6	-
1	4305787	4305788	tss	5	-
1	4306058	4306059	tss	6	+
1	4322944	4322945	tss	6	-
1	4328480	4328481	tss	5	-
1	4334615	4334616	tss	6	+
1	4342283	4342284	tss	4	+
1	4348326	4348327	tss	6	-
1	4348500	4348501	tss	5	+
1	4351214	4351215	tss	33	+
1	4358223	4358224	tss	6	-
1	4358327	4358328	tss	5	-
1	4362398	4362399	tss	2	-
1	4365265	4365266	tss	6	-
1	4367307	4367308	tss	6	+
1	4371268	4371269	tss	1	-
1	4371292	4371293	tss	5	-
1	4375169	4375170	tss	6	-
1	4375518	4375519	tss	6	+
1	4376232	4376233	tss	1	+
1	4381605	4381606	tss	6	-
1	4384686	4384687	tss	5	+
1	4389750	4389751	tss	6	+
1	4392855	4392856	tss	2	-
1	4394310	4394311	tss	4	-
1	4396218	4396219	tss	5	-
1	4398145	4398146	tss	6	-
1	4405573	4405574	tss	6	-
1	4419769	4419770	tss	1	+
1	4423639	4423640	tss	6	+
1	4433723	4433724	tss	1	+
1	4439463	4439464	tss	6	-
1	4443683	4443684	tss	1	-
1	4447405	4447406	tss	5	-
1	4452288	4452289	tss	6	+
1	4459165	4459166	tss	6	+
1	4461805	4461806	tss	6	+
1	4463975	4463976	tss	5	+
1	4467219	4467220	tss	6	+
1	4473212	4473213	tss	1	-
1	4483695	4483696	tss	5	-
1	4484586	4484587	tss	1	+
1	4492580	4492581	tss	6	-
1	4495027	4495028	tss	5	+
1	4498895	4498896	tss	6	+
1	4503461	4503462	tss	1	-
1	4510368	4510369	tss	1	-
1	4513937	4513938	tss	5	-
1	4515605	4515606	tss	1	+
1	4515636	4515637	tss	6	+
1	4526064	4526065	tss	2	-
1	4529978	4529979	tss	5	-
1	4542302	4542303	tss	6	+
1	4544955	4544956	tss	5	+
1	4547547	4547548	tss	6	+
1	4556891	4556892	tss	6	+
1	4567748	4567749	tss	5	-
1	4567934	4567935	tss	5	+
1	4571117	4571118	tss	5	-
1	4576620	4576621	tss	6	-
1	4577843	4577844	tss	5	-
1	4590393	4590394	tss	5	-
1	4594265	4594266	tss	1	-
1	4601262	4601263	tss	1	+
1	4606499	4606500	tss	5	+
1	4608500	4608501	tss	1	-
1	4609336	4609337	tss	1	-
1	4610564	4610565	tss	12	-
1	4615118	4615119	tss	1	-
1	4621579	4621580	tss	2	-
1	4624069	4624070	tss	2	-
1	4630820	4630821	tss	6	-
1	4633244	4633245	tss	1	-
1	4642062	4642063	tss	6	-
1	4644421	4644422	tss	5	-
1	4646852	4646853	tss	6	-
1	4647948	4647949	tss	4	+
1	4679803	4679804	tss	6	-
1	4682096	4682097	tss	5	-
1	4688155	4688156	tss	4	+
1	4693288	4693289	tss	1	+
1	4709827	4709828	tss	5	+
1	4710010	4710011	tss	6	+
1	4713673	4713674	tss	6	+
1	4718234	4718235	tss	5	-
1	4721710	4721711	tss	5	+
1	4724607	4724608	tss	2	+
1	4735546	4735547	tss	1	+
1	4741030	4741031	tss	5	-
1	4746910	4746911	tss	5	-
1	4748641	4748642	tss	5	-
1	4748872	4748873	tss	1	+
1	4755579	4755580	tss	4	-
1	4755791	4755792	tss	5	+
1	4761041	4761042	tss	6	+
1	4773590	4773591	tss	6	+
1	4776604	4776605	tss	6	+
1	4782533	4782534	tss	5	-
1	4790070	4790071	tss	2	+
1	4794763	4794764	tss	6	+
1	4797357	4797358	tss	6	+
1	4799417	4799418	tss	2	+
1	4801821	4801822	tss	5	-
1	4802667	4802668	tss	2	+
1	4802671	4802672	tss	1	+
1	4807516	4807517	tss	6	-
1	4818019	4818020	tss	5	-
1	4822527	4822528	tss	5	+
1	4827435	4827436	tss	6	-
1	4835083	4835084	tss	6	-
1	4837048	4837049	tss	5	-
1	4839632	4839633	tss	5	-
1	4839910	4839911	tss	1	+
1	4841847	4841848	tss	5	-
1	4845809	4845810	tss	1	-
1	4847161	4847162	tss	5	+
1	4855199	4855200	tss	1	-
1	4861270	4861271	tss	6	+
1	4865006	4865007	tss	1	+
1	4868451	4868452	tss	8	+
1	4872904	4872905	tss	5	+
1	4877177	4877178	tss	5	-
1	4877636	4877637	tss	6	+
1	4881951	4881952	tss	6	-
1	4884751	4884752	tss	5	-
1	4885058	4885059	tss	5	+
1	4888222	4888223	tss	18	+
1	4888225	4888226	tss	5	+
1	4888832	4888833	tss	6	+
1	4892250	4892251	tss	6	-
1	4897361	4897362	tss	6	+
1	4899144	4899145	tss	2	+
1	4899145	4899146	tss	6	+
1	4913151	4913152	tss	6	-
1	4915666	4915667	tss	6	+
1	4921595	4921596	tss	5	-
1	4928609	4928610	tss	6	-
1	4928653	4928654	tss	1	-
1	4930892	4930893	tss	6	-
1	4931909	4931910	tss	2	-
1	4933514	4933515	tss	24	-
1	4940680	4940681	tss	6	-
1	4947571	4947572	tss	1	-
1	4947929	4947930	tss	5	+
1	4964355	4964356	tss	1	-
1	4969795	4969796	tss	1	-
1	4970003	4970004	tss	15	-
1	4970012	4970013	tss	5	-
1	4970072	4970073	tss	8	-
1	4973721	4973722	tss	5	-
1	4980675	4980676	tss	5	+
1	4983565	4983566	tss	6	+
1	4989563	4989564	tss	5	+
1	5000637	5000638	tss	5	-
1	5009562	5009563	tss	2	-
1	5014480	5014481	tss	6	-
1	5016603	5016604	tss	5	-
1	5027664	5027665	tss	1	+
1	5027696	5027697	tss	12	+
1	5037611	5037612	tss	6	+
1	5040203	5040204	tss	2	+
1	5042331	5042332	tss	6	+
1	5047974	5047975	tss	5	+
1	5048482	5048483	tss	5	-
1	5054102	5054103	tss	8	-
1	5055233	5055234	tss	5	-
1	5058720	5058721	tss	6	+
1	5065029	5065030	tss	6	-
1	5067282	5067283	tss	2	-
1	5068509	5068510	tss	6	-
1	5073106	5073107	tss	4	+
1	5077790	5077791	tss	6	-
1	5088840	5088841	tss	5	-
1	5090989	5090990	tss	5	+
1	5098011	5098012	tss	1	-
1	5104688	5104689	tss	6	-
1	5106947	5106948	tss	5	-
1	5111630	5111631	tss	6	-
1	5115427	5115428	tss	6	-
1	5124741	5124742	tss	5	+
1	5129521	5129522	tss	6	-
1	5133700	5133701	tss	5	-
1	5137051	5137052	tss	1	+
1	5137059	5137060	tss	6	+
1	5143684	5143685	tss	5	-
1	5149273	5149274	tss	6	+
1	5153083	5153084	tss	5	-
1	5155560	5155561	tss	1	-
1	5158143	5158144	tss	6	-
1	5160080	5160081	tss	6	-
1	5166690	5166691	tss	6	-
1	5168240	5168241	tss	5	-
1	5168595	5168596	tss	5	+
1	5171209	5171210	tss	1	+
1	5176219	5176220	tss	6	-
1	5177539	5177540	tss	6	+
1	5181384	5181385	tss	4	-
1	5181388	5181389	tss	8	-
1	5186228	5186229	tss	4	-
1	5186933	5186934	tss	4	-
1	5186964	5186965	tss	6	-
1	5187635	5187636	tss	5	+
1	5194202	5194203	tss	5	-
1	5199191	5199192	tss	6	+
1	5202860	5202861	tss	1	+
1	5204111	5204112	tss	1	-
1	5209898	5209899	tss	5	-
1	5212214	5212215	tss	6	-
1	5212614	5212615	tss	6	+
1	5220640	5220641	tss	5	+
1	5224389	5224390	tss	6	+
1	5231059	5231060	tss	6	-
1	5238101	5238102	tss	5	+
1	5241537	5241538	tss	6	-
1	5243226	5243227	tss	6	-
1	5243449	5243450	tss	9	+
1	5249427	5249428	tss	5	-
1	5249776	5249777	tss	6	+
1	5250862	5250863	tss	2	-
1	5252092	5252093	tss	6	-
1	5252095	5252096	tss	6	-
1	5252315	5252316	tss	6	+
1	5268601	5268602	tss	5	-
1	5271972	5271973	tss	2	-
1	5274345	5274346	tss	1	+
1	5277596	5277597	tss	1	-
1	5277621	5277622	tss	5	-
1	5279858	5279859	tss	1	-
1	5283540	5283541	tss	5	+
1	5287062	5287063	tss	5	+
1	5290748	5290749	tss	6	+
1	5292067	5292068	tss	2	+
1	5293264	5293265	tss	5	-
1	5294665	5294666	tss	6	+
1	5296863	5296864	tss	1	-
1	5298326	5298327	tss	1	+
1	5298943	5298944	tss	6	+
1	5303347	5303348	tss	5	-
1	5303376	5303377	tss	5	-
1	5304316	5304317	tss	6	+
1	5309513	5309514	tss	6	-
1	5313428	5313429	tss	6	-
1	5315538	5315539	tss	6	+
1	5323881	5323882	tss	6	-
1	5326289	5326290	tss	6	+
1	5326313	5326314	tss	1	+
1	5346165	5346166	tss	1	-
1	5362019	5362020	tss	6	+
1	5390034	5390035	tss	1	+
1	5390037	5390038	tss	6	+
1	5398989	5398990	tss	4	+
1	5398996	5398997	tss	12	+
1	5399126	5399127	tss	1	+
1	5401490	5401491	tss	2	+
1	5403817	5403818	tss	6	-
1	5404358	5404359	tss	4	+
1	5406026	5406027	tss	1	+
1	5409968	5409969	tss	6	-
1	5409982	5409983	tss	5	-
1	5410933	5410934	tss	6	+
1	5412464	5412465	tss	6	+
1	5420629	5420630	tss	6	-
1	5431605	5431606	tss	2	-
1	5443662	5443663	tss	1	-
1	5444449	5444450	tss	6	+
1	5446769	5446770	tss	1	+
1	5447760	5447761	tss	6	-
1	5454789	5454790	tss	1	+
1	5457083	5457084	tss	6	+
1	5460330	5460331	tss	6	-
1	5460601	5460602	tss	4	+
1	5461139	5461140	tss	2	-
1	5469557	5469558	tss	6	+
1	5471436	5471437	tss	6	+
1	5474094	5474095	tss	1	+
1	5478755	5478756	tss	1	+
1	5485112	5485113	tss	6	-
1	5488865	5488866	tss	1	-
1	5489299	5489300	tss	6	+
1	5494537	5494538	tss	5	+
1	5497719	5497720	tss	6	-
1	5498197	5498198	tss	1	+
1	5504534	5504535	tss	5	-
1	5504734	5504735	tss	13	+
1	5508506	5508507	tss	6	+
1	5513894	5513895	tss	5	-
1	5514316	5514317	tss	6	+
1	5518372	5518373	tss	5	+
1	5525490	5525491	tss	4	+
1	5539795	5539796	tss	6	-
1	5542460	5542461	tss	2	+
1	5547503	5547504	tss	6	-
1	5547551	5547552	tss	1	-
1	5556793	5556794	tss	6	-
1	5556994	5556995	tss	1	+
1	5562112	5562113	tss	1	-
1	5564253	5564254	tss	1	+
1	5574311	5574312	tss	5	+
1	5578430	5578431	tss	1	+
1	5578467	5578468	tss	5	+
1	5580854	5580855	tss	6	+
1	5590629	5590630	tss	4	-
1	5591514	5591515	tss	5	+
1	5594823	5594824	tss	4	-
1	5596693	5596694	tss	1	+
1	5602872	5602873	tss	6	+
1	5605158	5605159	tss	6	+
1	5608806	5608807	tss	6	+
1	5609983	5609984	tss	6	+
1	5613866	5613867	tss	4	-
1	5614618	5614619	tss	5	+
1	5617809	5617810	tss	5	+
1	5622567	5622568	tss	1	-
1	5622632	5622633	tss	1	-
1	5624616	5624617	tss	6	+
1	5639031	5639032	tss	5	+
1	5645302	5645303	tss	1	-
1	5645442	5645443	tss	5	-
1	5648769	5648770	tss	5	+
1	5668427	5668428	tss	5	+
1	5673590	5673591	tss	5	-
1	5673827	5673828	tss	4	+
1	5678740	5678741	tss	6	-
1	5684866	5684867	tss	1	-
1	5697350	5697351	tss	6	+
1	5709807	5709808	tss	6	+
1	5718402	5718403	tss	1	-
1	5723087	5723088	tss	6	+
1	5727111	5727112	tss	4	-
1	5727185	5727186	tss	8	-
1	5731869	5731870	tss	5	-
1	5744552	5744553	tss	3	+
1	5755630	5755631	tss	6	+
1	5758275	5758276	tss	4	-
1	5764072	5764073	tss	6	-
1	5765650	5765651	tss	4	-
1	5767350	5767351	tss	5	+
1	5767351	5767352	tss	6	+
1	5773207	5773208	tss	6	-
1	5773711	5773712	tss	6	+
1	5778423	5778424	tss	6	-
1	5782430	5782431	tss	5	-
1	5783839	5783840	tss	5	-
1	5789218	5789219	tss	1	-
1	5805798	5805799	tss	2	-
1	5817574	5817575	tss	5	+
1	5820241	5820242	tss	6	+
1	5822445	5822446	tss	5	+
1	5829911	5829912	tss	5	+
1	5835331	5835332	tss	1	-
1	5837589	5837590	tss	1	+
1	5839227	5839228	tss	2	+
1	5841565	5841566	tss	6	-
1	5844286	5844287	tss	6	-
1	5851952	5851953	tss	6	+
1	5854147	5854148	tss	1	+
1	5858443	5858444	tss	1	-
1	5862676	5862677	tss	6	-
1	5872148	5872149	tss	5	+
1	5875373	5875374	tss	1	+
1	5878451	5878452	tss	6	+
1	5884755	5884756	tss	1	-
1	5885082	5885083	tss	6	+
1	5892009	5892010	tss	5	+
1	5901498	5901499	tss	1	+
1	5911691	5911692	tss	5	-
1	5920047	5920048	tss	1	-
1	5920776	5920777	tss	1	+
1	5922774	5922775	tss	6	+
1	5925708	5925709	tss	2	+
1	5926022	5926023	tss	4	+
1	5929908	5929909	tss	5	+
1	5934011	5934012	tss	5	+
1	5935462	5935463	tss	1	+
1	5940422	5940423	tss	5	+
1	5941821	5941822	tss	5	+
1	5954878	5954879	tss	1	-
1	5957211	5957212	tss	5	-
1	5977410	5977411	tss	5	+
1	5982266	5982267	tss	5	+
1	5987770	5987771	tss	6	-
1	5991438	5991439	tss	5	-
1	5997265	5997266	tss	2	+
1	5998814	5998815	tss	6	+
1	6002923	6002924	tss	6	+
1	6008613	6008614	tss	6	+
1	6024249	6024250	tss	5	-
1	6027384	6027385	tss	5	-
1	6027630	6027631	tss	6	+
1	6032753	6032754	tss	4	-
1	6034361	6034362	tss	5	+
1	6038666	6038667	tss	5	-
1	6062226	6062227	tss	1	+
1	6062257	6062258	tss	6	+
1	6071934	6071935	tss	5	-
1	6076076	6076077	tss	2	+
1	6076130	6076131	tss	5	+
1	6088339	6088340	tss	6	-
1	6094394	6094395	tss	1	-
1	6098329	6098330	tss	6	-
1	6098332	6098333	tss	6	-
1	6098382	6098383	tss	1	-
1	6099110	6099111	tss	5	+
1	6101118	6101119	tss	6	+
1	6101982	6101983	tss	6	-
1	6116616	6116617	tss	6	-
1	6123714	6123715	tss	5	+
1	6127403	6127404	tss	6	-
1	6130106	6130107	tss	1	+
1	6133490	6133491	tss	2	-
1	6135344	6135345	tss	5	-
1	6137392	6137393	tss	6	-
1	6142623	6142624	tss	6	+
1	6149300	6149301	tss	6	+
1	6149305	6149306	tss	6	+
1	6152221	6152222	tss	1	-
1	6153950	6153951	tss	6	-
1	6153952	6153953	tss	6	-
1	6155741	6155742	tss	6	-
1	6165381	6165382	tss	6	-
1	6167885	6167886	tss	5	-
1	6168442	6168443	tss	2	-
1	6173222	6173223	tss	2	-
1	6183805	6183806	tss	5	-
1	6184919	6184920	tss	6	+
1	6191707	6191708	tss	1	-
1	6193777	6193778	tss	5	-
1	6193960	6193961	tss	2	-
1	6193991	6193992	tss	6	-
1	6194777	6194778	tss	2	+
1	6196126	6196127	tss	4	-
1	6196154	6196155	tss	6	-
1	6199871	6199872	tss	6	+
1	6199899	6199900	tss	4	+
1	6201248	6201249	tss	2	-
1	6202034	6202035	tss	6	+
1	6202065	6202066	tss	2	+
1	6202248	6202249	tss	5	+
1	6204342	6204343	tss	6	+
1	6209499	6209500	tss	5	-
1	6213354	6213355	tss	6	-
1	6213370	6213371	tss	1	-
1	6218318	6218319	tss	5	-
1	6222255	6222256	tss	6	+
1	6224504	6224505	tss	6	+
1	6241432	6241433	tss	1	-
1	6247736	6247737	tss	6	-
1	6248793	6248794	tss	5	+
1	6261449	6261450	tss	6	-
1	6262612	6262613	tss	1	+
1	6266931	6266932	tss	1	-
1	6268820	6268821	tss	1	-
1	6268827	6268828	tss	6	-
1	6282077	6282078	tss	6	-
1	6293827	6293828	tss	6	-
1	6299686	6299687	tss	1	+
1	6304311	6304312	tss	4	+
1	6307901	6307902	tss	6	-
1	6319426	6319427	tss	6	-
1	6325639	6325640	tss	5	+
1	6331397	6331398	tss	5	+
1	6345661	6345662	tss	5	-
1	6345975	6345976	tss	5	+
1	6348108	6348109	tss	1	+
1	6352513	6352514	tss	5	+
1	6360165	6360166	tss	4	-
1	6361628	6361629	tss	6	+
1	6363921	6363922	tss	1	+
1	6367211	6367212	tss	6	+
1	6378577	6378578	tss	6	-
1	6389485	6389486	tss	5	+
1	6395863	6395864	tss	6	+
1	6395927	6395928	tss	6	+
1	6398579	6398580	tss	5	+
1	6400477	6400478	tss	6	+
1	6407883	6407884	tss	5	+
1	6410032	6410033	tss	5	+
1	6414724	6414725	tss	1	+
1	6418683	6418684	tss	6	-
1	6420522	6420523	tss	1	-
1	6421362	6421363	tss	5	+
1	6433444	6433445	tss	5	-
1	6433571	6433572	tss	9	+
1	6433573	6433574	tss	5	+
1	6437531	6437532	tss	6	+
1	6442701	6442702	tss	1	+
1	6450593	6450594	tss	6	+
1	6459714	6459715	tss	6	-
1	6460565	6460566	tss	4	+
1	6461751	6461752	tss	6	-
1	6463993	6463994	tss	6	+
1	6466453	6466454	tss	6	-
1	6483585	6483586	tss	5	-
1	6486792	6486793	tss	5	-
1	6506420	6506421	tss	6	-
1	6520752	6520753	tss	6	+
1	6525961	6525962	tss	1	-
1	6528983	6528984	tss	5	+
1	6533344	6533345	tss	4	-
1	6560488	6560489	tss	5	-
1	6562779	6562780	tss	6	-
1	6565493	6565494	tss	6	+
1	6568072	6568073	tss	22	+
1	6568075	6568076	tss	4	+
1	6594929	6594930	tss	2	+
1	6602164	6602165	tss	5	+
1	6608143	6608144	tss	6	+
1	6610601	6610602	tss	5	-
1	6612515	6612516	tss	6	-
1	6612763	6612764	tss	5	+
1	6616642	6616643	tss	6	+
1	6622093	6622094	tss	6	+
1	6622112	6622113	tss	6	+
1	6622119	6622120	tss	6	+
1	6624244	6624245	tss	5	+
1	6650399	6650400	tss	6	-
1	6662699	6662700	tss	1	+
1	6671743	6671744	tss	5	+
1	6672571	6672572	tss	11	-
1	6677644	6677645	tss	6	-
1	6679280	6679281	tss	4	+
1	6683496	6683497	tss	4	-
1	6684799	6684800	tss	5	+
1	6688703	6688704	tss	6	+
1	6689466	6689467	tss	5	+
1	6692440	6692441	tss	1	-
1	6694928	6694929	tss	6	-
1	6698059	6698060	tss	1	+
1	6712456	6712457	tss	2	-
1	6714240	6714241	tss	1	-
1	6714246	6714247	tss	6	-
1	6728039	6728040	tss	6	-
1	6730263	6730264	tss	1	+
1	6734879	6734880	tss	6	-
1	6734881	6734882	tss	6	-
1	6744412	6744413	tss	3	+
1	6754054	6754055	tss	5	-
1	6757376	6757377	tss	5	-
1	6761698	6761699	tss	6	+
1	6763914	6763915	tss	6	+
1	6765670	6765671	tss	5	+
1	6774428	6774429	tss	6	-
1	6774450	6774451	tss	5	-
1	6774454	6774455	tss	6	-
1	6774818	6774819	tss	4	+
1	6774849	6774850	tss	4	+
1	6774876	6774877	tss	4	+
1	6774885	6774886	tss	1	+
1	6779023	6779024	tss	1	+
1	6782038	6782039	tss	6	-
1	6791761	6791762	tss	1	-
1	6797869	6797870	tss	2	-
1	6799702	6799703	tss	6	-
1	6801237	6801238	tss	2	-
1	6802648	6802649	tss	6	-
1	6804969	6804970	tss	5	-
1	6805458	6805459	tss	1	+
1	6809562	6809563	tss	4	-
1	6812490	6812491	tss	6	-
1	6814792	6814793	tss	4	+
1	6814835	6814836	tss	4	+
1	6819508	6819509	tss	6	-
1	6819541	6819542	tss	5	-
1	6822136	6822137	tss	1	-
1	6824041	6824042	tss	5	-
1	6824321	6824322	tss	5	+
1	6846378	6846379	tss	5	+
1	6852154	6852155	tss	5	+
1	6857288	6857289	tss	2	-
1	6860328	6860329	tss	1	-
1	6886878	6886879	tss	5	+
1	6894697	6894698	tss	2	-
1	6895746	6895747	tss	2	-
1	6898608	6898609	tss	5	-
1	6900493	6900494	tss	1	+
1	6904037	6904038	tss	5	-
1	6908740	6908741	tss	6	-
1	6916672	6916673	tss	5	-
1	6920376	6920377	tss	6	-
1	6924188	6924189	tss	6	+
1	6928038	6928039	tss	1	+
1	6933015	6933016	tss	5	+
1	6935246	6935247	tss	1	+
1	6935248	6935249	tss	2	+
1	6940529	6940530	tss	6	-
1	6942832	6942833	tss	6	+
1	6945694	6945695	tss	4	+
1	6949096	6949097	tss	1	+
1	6956520	6956521	tss	5	+
1	6959122	6959123	tss	5	-
1	6966952	6966953	tss	7	+
1	6970953	6970954	tss	5	-
1	6971484	6971485	tss	6	+
1	6971490	6971491	tss	6	+
1	6971541	6971542	tss	6	+
1	6973348	6973349	tss	2	+
1	6977884	6977885	tss	6	+
1	6986360	6986361	tss	6	+
1	6993886	6993887	tss	1	-
1	6999750	6999751	tss	6	-
1	7004374	7004375	tss	5	-
1	7004416	7004417	tss	6	-
1	7007648	7007649	tss	6	-
1	7009332	7009333	tss	6	-
1	7016695	7016696	tss	8	+
1	7016709	7016710	tss	6	+
1	7016721	7016722	tss	4	+
1	7016730	7016731	tss	4	+
1	7016731	7016732	tss	8	+
1	7029645	7029646	tss	6	+
1	7034177	7034178	tss	1	-
1	7040109	7040110	tss	5	-
1	7040121	7040122	tss	6	-
1	7040142	7040143	tss	5	-
1	7043325	7043326	tss	6	-
1	7043722	7043723	tss	5	+
1	7047743	7047744	tss	5	-
1	7053640	7053641	tss	6	-
1	7065496	7065497	tss	1	+
1	7082546	7082547	tss	5	-
1	7083834	7083835	tss	6	-
1	7085769	7085770	tss	6	-
1	7088869	7088870	tss	6	-
1	7088872	7088873	tss	1	+
1	7089210	7089211	tss	9	-
1	7089213	7089214	tss	6	-
1	7091293	7091294	tss	5	+
1	7094259	7094260	tss	5	+
1	7098454	7098455	tss	2	+
1	7105868	7105869	tss	6	-
1	7112620	7112621	tss	5	+
1	7118160	7118161	tss	1	-
1	7121813	7121814	tss	6	-
1	7128716	7128717	tss	1	-
1	7128744	7128745	tss	4	-
1	7128887	7128888	tss	6	+
1	7143084	7143085	tss	6	+
1	7143087	7143088	tss	6	+
1	7146729	7146730	tss	6	+
1	7154559	7154560	tss	5	+
1	7160340	7160341	tss	4	-
1	7160524	7160525	tss	4	-
1	7167847	7167848	tss	6	-
1	7174437	7174438	tss	5	+
1	7176777	7176778	tss	6	+
1	7176862	7176863	tss	5	+
1	7179527	7179528	tss	5	+
1	7179568	7179569	tss	6	+
1	7209391	7209392	tss	1	+
1	7209399	7209400	tss	1	+
1	7211988	7211989	tss	2	+
1	7216703	7216704	tss	1	-
1	7217127	7217128	tss	6	+
1	7232020	7232021	tss	5	+
1	7232804	7232805	tss	5	+
1	7234287	7234288	tss	2	+
1	7238799	7238800	tss	6	+
1	7242919	7242920	tss	5	+
1	7252174	7252175	tss	1	+
1	7265437	7265438	tss	6	-
1	7272568	7272569	tss	1	+
1	7278151	7278152	tss	5	-
1	7287151	7287152	tss	5	+
1	7289245	7289246	tss	2	+
1	7294744	7294745	tss	1	-
1	7301414	7301415	tss	6	-
1	7302741	7302742	tss	2	-
1	7304308	7304309	tss	6	-
1	7318488	7318489	tss	5	+
1	7324589	7324590	tss	1	+
1	7327905	7327906	tss	6	+
1	7337762	7337763	tss	6	+
1	7337766	7337767	tss	6	+
1	7346160	7346161	tss	1	+
1	7366867	7366868	tss	5	+
1	7374277	7374278	tss	1	+
1	7374364	7374365	tss	1	+
1	7377715	7377716	tss	5	-
1	7382167	7382168	tss	6	-
1	7382461	7382462	tss	6	-
1	7384644	7384645	tss	2	+
1	7385829	7385830	tss	4	+
1	7388427	7388428	tss	6	-
1	7391552	7391553	tss	5	-
1	7396772	7396773	tss	2	-
1	7400603	7400604	tss	1	-
1	7404382	7404383	tss	5	+
1	7412390	7412391	tss	1	-
1	7420853	7420854	tss	1	-
1	7421216	7421217	tss	6	+
1	7439265	7439266	tss	6	+
1	7440936	7440937	tss	2	+
1	7444930	7444931	tss	6	+
1	7447194	7447195	tss	1	+
1	7448458	7448459	tss	5	-
1	7479032	7479033	tss	5	-
1	7481251	7481252	tss	2	+
1	7483881	7483882	tss	5	+
1	7488685	7488686	tss	6	-
1	7490736	7490737	tss	1	-
1	7493438	7493439	tss	5	+
1	7497142	7497143	tss	6	+
1	7504150	7504151	tss	1	-
1	7508970	7508971	tss	6	+
1	7513352	7513353	tss	5	-
1	7521496	7521497	tss	6	-
1	7530962	7530963	tss	6	-
1	7534809	7534810	tss	5	-
1	7544677	7544678	tss	1	-
1	7550564	7550565	tss	6	-
1	7553873	7553874	tss	6	-
1	7554839	7554840	tss	4	+
1	7565802	7565803	tss	4	-
1	7567841	7567842	tss	1	-
1	7569900	7569901	tss	6	-
1	7573801	7573802	tss	6	-
1	7573845	7573846	tss	6	-
1	7573950	7573951	tss	6	+
1	7581151	7581152	tss	6	+
1	7585214	7585215	tss	1	+
1	7588640	7588641	tss	5	+
1	7588725	7588726	tss	6	+
1	7604179	7604180	tss	1	-
1	7604214	7604215	tss	6	-
1	7605698	7605699	tss	5	+
1	7610397	7610398	tss	6	+
1	7613004	7613005	tss	6	+
1	7615643	7615644	tss	12	+
1	7619876	7619877	tss	1	-
1	7624135	7624136	tss	5	-
1	7624410	7624411	tss	4	+
1	7626306	7626307	tss	1	+
1	7626334	7626335	tss	6	+
1	7645700	7645701	tss	6	+
1	7649273	7649274	tss	1	+
1	7652212	7652213	tss	5	-
1	7652729	7652730	tss	1	+
1	7654253	7654254	tss	6	+
1	7657342	7657343	tss	1	-
1	7662538	7662539	tss	2	-
1	7662548	7662549	tss	8	-
1	7662575	7662576	tss	2	-
1	7662605	7662606	tss	6	-
1	7662607	7662608	tss	1	-
1	7666459	7666460	tss	4	+
1	7680480	7680481	tss	6	+
1	7685660	7685661	tss	6	-
1	7692378	7692379	tss	5	-
1	7696535	7696536	tss	4	+
1	7706139	7706140	tss	6	-
1	7712905	7712906	tss	1	+
1	7734738	7734739	tss	2	+
1	7753518	7753519	tss	1	-
1	7754320	7754321	tss	5	+
1	7760555	7760556	tss	5	-
1	7767923	7767924	tss	1	+
1	7771641	7771642	tss	5	+
1	7789503	7789504	tss	1	+
1	7815600	7815601	tss	6	-
1	7823169	7823170	tss	6	+
1	7826328	7826329	tss	5	+
1	7830274	7830275	tss	6	-
1	7835808	7835809	tss	6	+
1	7840758	7840759	tss	6	-
1	7846601	7846602	tss	4	+
1	7858863	7858864	tss	5	+
1	7865480	7865481	tss	4	+
1	7865492	7865493	tss	17	+
1	7865494	7865495	tss	8	+
1	7865508	7865509	tss	4	+
1	7874041	7874042	tss	6	+
1	7879949	7879950	tss	2	-
1	7881147	7881148	tss	12	-
1	7881201	7881202	tss	6	-
1	7883697	7883698	tss	6	-
1	7883741	7883742	tss	5	-
1	7897590	7897591	tss	6	-
1	7898749	7898750	tss	1	-
1	7899260	7899261	tss	6	-
1	7906672	7906673	tss	6	-
1	7909707	7909708	tss	2	-
1	7919209	7919210	tss	5	+
1	7922531	7922532	tss	1	+
1	7925313	7925314	tss	6	+
1	7933389	7933390	tss	5	-
1	7935107	7935108	tss	4	-
1	7949570	7949571	tss	1	+
1	7952672	7952673	tss	1	-
1	7954417	7954418	tss	4	-
1	7955968	7955969	tss	2	-
1	7958408	7958409	tss	5	-
1	7958441	7958442	tss	5	-
1	7964041	7964042	tss	1	+
1	7968640	7968641	tss	1	-
1	7981789	7981790	tss	5	+
1	7994290	7994291	tss	1	+
1	7994299	7994300	tss	6	+
1	8002943	8002944	tss	6	-
1	8003384	8003385	tss	6	+
1	8006196	8006197	tss	6	+
1	8017396	8017397	tss	6	+
1	8027299	8027300	tss	5	+
1	8029966	8029967	tss	6	-
1	8033042	8033043	tss	6	-
1	8033050	8033051	tss	6	-
1	8033051	8033052	tss	5	-
1	8033116	8033117	tss	5	-
1	8046152	8046153	tss	6	+
1	8050863	8050864	tss	6	+
1	8055325	8055326	tss	6	+
1	8067930	8067931	tss	6	+
1	8069489	8069490	tss	5	+
1	8071983	8071984	tss	1	+
1	8076730	8076731	tss	4	+
1	8079296	8079297	tss	6	+
1	8082836	8082837	tss	6	-
1	8086885	8086886	tss	1	+
1	8095501	8095502	tss	5	+
1	8099126	8099127	tss	5	+
1	8101593	8101594	tss	1	+
1	8102813	8102814	tss	5	+
1	8104504	8104505	tss	4	-
1	8105588	8105589	tss	6	+
1	8111115	8111116	tss	5	-
1	8117396	8117397	tss	6	+
1	8119203	8119204	tss	1	+
1	8122350	8122351	tss	5	+
1	8132207	8132208	tss	6	-
1	8135919	8135920	tss	6	-
1	8139164	8139165	tss	12	+
1	8143634	8143635	tss	5	+
1	8147263	8147264	tss	5	+
1	8156655	8156656	tss	5	+
1	8157792	8157793	tss	2	+
1	8158379	8158380	tss	2	+
1	8164988	8164989	tss	1	+
1	8169266	8169267	tss	5	-
1	8172991	8172992	tss	6	-
1	8183569	8183570	tss	6	-
1	8195787	8195788	tss	5	+
1	8198719	8198720	tss	5	+
1	8200382	8200383	tss	6	+
1	8206565	8206566	tss	5	+
1	8215720	8215721	tss	1	+
1	8216078	8216079	tss	5	+
1	8219898	8219899	tss	6	+
1	8222860	8222861	tss	2	+
1	8227177	8227178	tss	6	+
1	8227180	8227181	tss	1	+
1	8234892	8234893	tss	2	-
1	8242509	8242510	tss	6	+
1	8258686	8258687	tss	6	-
1	8262983	8262984	tss	12	+
1	8270618	8270619	tss	6	-
1	8271702	8271703	tss	11	-
1	8271720	8271721	tss	6	-
1	8280986	8280987	tss	5	-
1	8286789	8286790	tss	5	-
1	8294263	8294264	tss	4	-
1	8296922	8296923	tss	5	-
1	8302650	8302651	tss	5	-
1	8310641	8310642	tss	5	-
1	8314743	8314744	tss	6	-
1	8321679	8321680	tss	12	+
1	8321682	8321683	tss	4	+
1	8321686	8321687	tss	10	+
1	8321689	8321690	tss	4	+
1	8333631	8333632	tss	5	+
1	8333817	8333818	tss	5	+
1	8336703	8336704	tss	18	+
1	8345594	8345595	tss	4	+
1	8351276	8351277	tss	4	+
1	8385273	8385274	tss	1	+
1	8395575	8395576	tss	6	+
1	8399685	8399686	tss	6	-
1	8400179	8400180	tss	5	+
1	8402045	8402046	tss	1	+
1	8408520	8408521	tss	6	-
1	8414878	8414879	tss	6	-
1	8420341	8420342	tss	6	+
1	8424087	8424088	tss	6	-
1	8425375	8425376	tss	6	-
1	8427089	8427090	tss	8	-
1	8427234	8427235	tss	12	-
1	8427999	8428000	tss	4	-
1	8432177	8432178	tss	6	+
1	8434969	8434970	tss	6	+
1	8440847	8440848	tss	1	-
1	8440865	8440866	tss	6	-
1	8441165	8441166	tss	5	+
1	8471388	8471389	tss	6	-
1	8480315	8480316	tss	6	-
1	8483847	8483848	tss	6	-
1	8486001	8486002	tss	5	-
1	8501510	8501511	tss	6	-
1	8503252	8503253	tss	1	+
1	8506778	8506779	tss	1	-
1	8506792	8506793	tss	5	-
1	8506804	8506805	tss	12	-
1	8507019	8507020	tss	5	+
1	8519015	8519016	tss	5	-
1	8527086	8527087	tss	7	-
1	8532188	8532189	tss	6	-
1	8541026	8541027	tss	5	+
1	8544419	8544420	tss	6	+
1	8558831	8558832	tss	5	-
1	8561291	8561292	tss	2	-
1	8563413	8563414	tss	6	-
1	8567015	8567016	tss	1	-
1	8586352	8586353	tss	6	+
1	8594543	8594544	tss	7	-
1	8600477	8600478	tss	6	+
1	8607483	8607484	tss	5	-
1	8609444	8609445	tss	5	+
1	8614231	8614232	tss	5	-
1	8618244	8618245	tss	1	-
1	8624068	8624069	tss	5	+
1	8630970	8630971	tss	1	-
1	8635208	8635209	tss	5	+
1	8640485	8640486	tss	5	-
1	8640598	8640599	tss	6	+
1	8659505	8659506	tss	6	-
1	8662059	8662060	tss	6	+
1	8664154	8664155	tss	6	+
1	8671072	8671073	tss	5	+
1	8682300	8682301	tss	1	+
1	8688204	8688205	tss	5	-
1	8688631	8688632	tss	4	+
1	8693226	8693227	tss	6	+
1	8702384	8702385	tss	5	+
1	8711527	8711528	tss	5	-
1	8713034	8713035	tss	2	-
1	8722675	8722676	tss	6	-
1	8727191	8727192	tss	5	-
1	8741941	8741942	tss	4	+
1	8763339	8763340	tss	1	-
1	8763354	8763355	tss	5	-
1	8767563	8767564	tss	7	+
1	8767567	8767568	tss	7	+
1	8769656	8769657	tss	2	+
1	8769659	8769660	tss	6	+
1	8769679	8769680	tss	1	+
1	8769688	8769689	tss	2	+
1	8769700	8769701	tss	1	+
1	8769717	8769718	tss	1	+
1	8769721	8769722	tss	6	+
1	8769826	8769827	tss	2	+
1	8775913	8775914	tss	5	+
1	8775914	8775915	tss	5	+
1	8775954	8775955	tss	5	+
1	8776298	8776299	tss	2	+
1	8776339	8776340	tss	1	+
1	8777328	8777329	tss	1	+
1	8778038	8778039	tss	6	-
1	8781943	8781944	tss	7	+
1	8781947	8781948	tss	2	+
1	8784035	8784036	tss	2	+
1	8784038	8784039	tss	6	+
1	8784058	8784059	tss	1	+
[truncated: 17,931 more rows]
