# Supplementary material for: Nanopore direct RNA sequencing maps the complexity of Arabidopsis mRNA processing and m6A modification
Source: eLife. 2020 Jan 14;9:e49658. doi: 10.7554/eLife.49658 (PMC6959997; doi:10.7554/eLife.49658)
Supplement: Figure 3—source data 2. [file elife-49658-fig3-data2.tds]

1	8712	8713	peak	1.39921	-	60	0.0398831	0.0398831	8712	0	0
1	8719	8720	peak	1.16565	-	44	0.0682883	0.0682883	8719	0	0
1	13573	13574	peak	1.29732	-	53	0.0504284	0.0504284	13573	0	0
1	13612	13613	peak	2.781	-	175	0.00165578	0.00165578	13612	0	0
1	13626	13627	peak	1.0212	-	35	0.0952355	0.0952355	13626	0	0
1	13631	13632	peak	1.58746	-	74	0.025855	0.025855	13631	0	0
1	33102	33103	peak	1.12439	-	42	0.0750952	0.0750952	33102	0	0
1	33106	33107	peak	1.33127	-	56	0.0466367	0.0466367	33106	0	0
1	33113	33114	peak	14.8085	-	1960	1.55431e-15	1.55431e-15	33113	0	0
1	33115	33116	peak	1.08352	-	39	0.0825043	0.0825043	33115	0	0
1	33116	33117	peak	5.42823	-	434	3.73051e-06	3.73051e-06	33116	0	0
1	33134	33135	peak	1.6785	-	81	0.0209652	0.0209652	33134	0	0
1	33147	33148	peak	1.89375	-	98	0.0127718	0.0127718	33147	0	0
1	46759	46760	peak	1.22155	-	48	0.0600408	0.0600408	46759	0	0
1	46783	46784	peak	1.32337	-	55	0.0474926	0.0474926	46783	0	0
1	46816	46817	peak	1.16412	-	44	0.0685305	0.0685305	46816	0	0
1	46825	46826	peak	3.02298	-	197	0.000948469	0.000948469	46825	0	0
1	46829	46830	peak	2.07568	-	113	0.00840071	0.00840071	46829	0	0
1	49264	49265	peak	1.05444	-	38	0.088218	0.088218	49264	0	0
1	49271	49272	peak	2.49697	-	152	0.00318441	0.00318441	49271	0	0
1	49276	49277	peak	1.21906	-	48	0.0603872	0.0603872	49276	0	0
1	49278	49279	peak	6.18528	-	513	6.52714e-07	6.52714e-07	49278	0	0
1	49280	49281	peak	2.71908	-	170	0.00190951	0.00190951	49280	0	0
1	49282	49283	peak	2.91842	-	188	0.00120664	0.00120664	49282	0	0
1	49283	49284	peak	1.10109	-	40	0.0792342	0.0792342	49283	0	0
1	49285	49286	peak	1.53354	-	70	0.0292726	0.0292726	49285	0	0
1	49287	49288	peak	2.85784	-	182	0.00138728	0.00138728	49287	0	0
1	51179	51180	peak	2.88518	-	212	0.00130264	0.00130264	51179	0	0
1	51181	51182	peak	15.1764	-	7318	6.66134e-16	6.66134e-16	51181	0	0
1	51182	51183	peak	2.6691	-	185	0.00214239	0.00214239	51182	0	0
1	51183	51184	peak	1.79899	-	101	0.0158857	0.0158857	51183	0	0
1	51184	51185	peak	11.2974	-	1137	5.04152e-12	5.04152e-12	51184	0	0
1	51185	51186	peak	3.21645	-	231	0.00060751	0.00060751	51185	0	0
1	51186	51187	peak	14.7505	-	6039	1.77636e-15	1.77636e-15	51186	0	0
1	51187	51188	peak	1.58056	-	76	0.0262689	0.0262689	51187	0	0
1	51188	51189	peak	2.00766	-	111	0.00982506	0.00982506	51188	0	0
1	51190	51191	peak	inf	-	2263	0	0	51190	0	0
1	51192	51193	peak	4.21273	-	313	6.12737e-05	6.12737e-05	51192	0	0
1	51193	51194	peak	3.3115	-	225	0.00048809	0.00048809	51193	0	0
1	51194	51195	peak	4.60588	-	351	2.47812e-05	2.47812e-05	51194	0	0
1	51195	51196	peak	3.90787	-	282	0.000123631	0.000123631	51195	0	0
1	51196	51197	peak	2.26999	-	130	0.00537047	0.00537047	51196	0	0
1	51198	51199	peak	3.18872	-	213	0.000647566	0.000647566	51198	0	0
1	52209	52210	peak	1.2697	+	51	0.0537398	0.0537398	52209	0	0
1	59126	59127	peak	5.96627	-	486	1.08075e-06	1.08075e-06	59126	0	0
1	67586	67587	peak	2.1915	-	124	0.00643421	0.00643421	67586	0	0
1	67624	67625	peak	7.51923	-	647	3.02533e-08	3.02533e-08	67624	0	0
1	72308	72309	peak	1.05509	+	37	0.0880872	0.0880872	72308	0	0
1	72336	72337	peak	1.88156	+	97	0.0131352	0.0131352	72336	0	0
1	72338	72339	peak	2.87224	+	183	0.00134201	0.00134201	72338	0	0
1	72344	72345	peak	1.67943	+	81	0.0209205	0.0209205	72344	0	0
1	72349	72350	peak	1.69149	+	82	0.0203473	0.0203473	72349	0	0
1	72416	72417	peak	2.40162	+	142	0.00396623	0.00396623	72416	0	0
1	72420	72421	peak	1.22095	+	48	0.0601244	0.0601244	72420	0	0
1	72489	72490	peak	1.0795	+	39	0.0832718	0.0832718	72489	0	0
1	74687	74688	peak	1.16708	-	47	0.0680648	0.0680648	74687	0	0
1	74712	74713	peak	1.3697	-	60	0.0426871	0.0426871	74712	0	0
1	74717	74718	peak	1.33109	-	57	0.0466563	0.0466563	74717	0	0
1	74720	74721	peak	6.68351	-	578	2.07247e-07	2.07247e-07	74720	0	0
1	74721	74722	peak	1.95766	-	106	0.0110239	0.0110239	74721	0	0
1	74723	74724	peak	15.4775	-	1647	3.33067e-16	3.33067e-16	74723	0	0
1	74724	74725	peak	1.56785	-	74	0.0270489	0.0270489	74724	0	0
1	74728	74729	peak	2.15306	-	122	0.00702972	0.00702972	74728	0	0
1	74730	74731	peak	inf	-	7276	0	0	74730	0	0
1	74731	74732	peak	3.51438	-	244	0.000305926	0.000305926	74731	0	0
1	74734	74735	peak	11.1064	-	1027	7.82785e-12	7.82785e-12	74734	0	0
1	75584	75585	peak	1.03873	+	36	0.0914677	0.0914677	75584	0	0
1	88897	88898	peak	3.1003	+	204	0.000793788	0.000793788	88897	0	0
1	88900	88901	peak	1.34199	+	56	0.0454998	0.0454998	88900	0	0
1	88902	88903	peak	1.24014	+	49	0.0575248	0.0575248	88902	0	0
1	88913	88914	peak	1.98998	+	106	0.0102334	0.0102334	88913	0	0
1	88921	88922	peak	1.36831	+	58	0.042824	0.042824	88921	0	0
1	97451	97452	peak	1.35699	+	57	0.0439551	0.0439551	97451	0	0
1	97455	97456	peak	2.76251	+	173	0.0017278	0.0017278	97455	0	0
1	97458	97459	peak	1.58844	+	74	0.0257965	0.0257965	97458	0	0
1	97471	97472	peak	1.85559	+	95	0.0139448	0.0139448	97471	0	0
1	97473	97474	peak	1.10221	+	40	0.0790292	0.0790292	97473	0	0
1	97475	97476	peak	1.60049	+	75	0.0250907	0.0250907	97475	0	0
1	97481	97482	peak	1.46617	+	65	0.0341843	0.0341843	97481	0	0
1	97505	97506	peak	1.86386	+	96	0.0136817	0.0136817	97505	0	0
1	99921	99922	peak	3.15437	+	209	0.000700856	0.000700856	99921	0	0
1	99923	99924	peak	1.11867	+	41	0.0760912	0.0760912	99923	0	0
1	99989	99990	peak	1.53483	+	70	0.0291857	0.0291857	99989	0	0
1	105321	105322	peak	1.19397	-	46	0.0639777	0.0639777	105321	0	0
1	114285	114286	peak	3.2388	+	217	0.000577031	0.000577031	114285	0	0
1	114287	114288	peak	1.10236	+	40	0.0790019	0.0790019	114287	0	0
1	114290	114291	peak	1.41168	+	61	0.0387544	0.0387544	114290	0	0
1	117029	117030	peak	1.28384	+	52	0.0520182	0.0520182	117029	0	0
1	117033	117034	peak	7.41741	+	644	3.82463e-08	3.82463e-08	117033	0	0
1	117036	117037	peak	4.74254	+	370	1.80911e-05	1.80911e-05	117036	0	0
1	120140	120141	peak	6.58132	+	549	2.62229e-07	2.62229e-07	120140	0	0
1	120165	120166	peak	1.30965	+	54	0.0490175	0.0490175	120165	0	0
1	120169	120170	peak	1.53026	+	70	0.0294944	0.0294944	120169	0	0
1	120174	120175	peak	1.16057	+	44	0.0690928	0.0690928	120174	0	0
1	120196	120197	peak	1.35055	+	57	0.0446123	0.0446123	120196	0	0
1	120204	120205	peak	1.43417	+	63	0.0367987	0.0367987	120204	0	0
1	130500	130501	peak	1.21824	-	49	0.060501	0.060501	130500	0	0
1	130503	130504	peak	1.06973	-	39	0.0851676	0.0851676	130503	0	0
1	130568	130569	peak	2.05695	-	112	0.00877102	0.00877102	130568	0	0
1	130574	130575	peak	1.32568	-	55	0.0472406	0.0472406	130574	0	0
1	130576	130577	peak	1.36892	-	58	0.0427645	0.0427645	130576	0	0
1	136144	136145	peak	1.16557	+	44	0.068301	0.068301	136144	0	0
1	136149	136150	peak	1.18063	+	45	0.0659741	0.0659741	136149	0	0
1	136156	136157	peak	3.14124	+	208	0.000722377	0.000722377	136156	0	0
1	142017	142018	peak	1.91881	+	100	0.0120555	0.0120555	142017	0	0
1	142023	142024	peak	1.10289	+	40	0.0789063	0.0789063	142023	0	0
1	142041	142042	peak	1.6146	+	76	0.0242884	0.0242884	142041	0	0
1	142092	142093	peak	2.25957	+	129	0.0055008	0.0055008	142092	0	0
1	142094	142095	peak	3.19847	+	214	0.000633188	0.000633188	142094	0	0
1	142099	142100	peak	1.97458	+	105	0.0106028	0.0106028	142099	0	0
1	142102	142103	peak	1.01992	+	35	0.0955177	0.0955177	142102	0	0
1	158610	158611	peak	3.54539	-	246	0.000284844	0.000284844	158610	0	0
1	158613	158614	peak	1.02168	-	35	0.0951316	0.0951316	158613	0	0
1	163412	163413	peak	1.83266	+	93	0.0147008	0.0147008	163412	0	0
1	168714	168715	peak	1.9185	+	100	0.0120643	0.0120643	168714	0	0
1	172881	172882	peak	2.22814	-	126	0.00591374	0.00591374	172881	0	0
1	172883	172884	peak	1.38449	-	59	0.0412581	0.0412581	172883	0	0
1	172885	172886	peak	1.05459	-	37	0.0881877	0.0881877	172885	0	0
1	176514	176515	peak	1.39658	-	87	0.0401257	0.0401257	176514	0	0
1	176515	176516	peak	1.14351	-	61	0.0718601	0.0718601	176515	0	0
1	176518	176519	peak	2.03782	-	157	0.00916602	0.00916602	176518	0	0
1	176519	176520	peak	1.69246	-	113	0.0203021	0.0203021	176519	0	0
1	176521	176522	peak	1.04828	-	45	0.0894796	0.0894796	176521	0	0
1	182164	182165	peak	1.3639	-	58	0.0432616	0.0432616	182164	0	0
1	182170	182171	peak	3.7938	-	272	0.000160767	0.000160767	182170	0	0
1	182186	182187	peak	1.76066	-	88	0.0173516	0.0173516	182186	0	0
1	182211	182212	peak	2.9629	-	193	0.00108918	0.00108918	182211	0	0
1	182214	182215	peak	1.26408	-	51	0.0544397	0.0544397	182214	0	0
1	182238	182239	peak	1.41875	-	62	0.0381283	0.0381283	182238	0	0
1	182249	182250	peak	1.3627	-	58	0.0433814	0.0433814	182249	0	0
1	182298	182299	peak	1.19122	-	46	0.064385	0.064385	182298	0	0
1	182326	182327	peak	1.08514	-	39	0.082198	0.082198	182326	0	0
1	182329	182330	peak	2.55629	-	155	0.00277783	0.00277783	182329	0	0
1	182332	182333	peak	1.62527	-	77	0.0236992	0.0236992	182332	0	0
1	182352	182353	peak	1.39776	-	60	0.0400165	0.0400165	182352	0	0
1	182355	182356	peak	6.34413	-	525	4.52757e-07	4.52757e-07	182355	0	0
1	182357	182358	peak	2.73913	-	171	0.00182336	0.00182336	182357	0	0
1	185136	185137	peak	3.15047	+	209	0.000707187	0.000707187	185136	0	0
1	187189	187190	peak	1.15008	+	43	0.0707817	0.0707817	187189	0	0
1	187203	187204	peak	1.61498	+	76	0.0242673	0.0242673	187203	0	0
1	187207	187208	peak	1.60123	+	75	0.0250477	0.0250477	187207	0	0
1	187210	187211	peak	1.90512	+	99	0.0124418	0.0124418	187210	0	0
1	187216	187217	peak	1.07006	+	38	0.0851015	0.0851015	187216	0	0
1	195822	195823	peak	3.71121	+	262	0.000194441	0.000194441	195822	0	0
1	199654	199655	peak	1.11882	+	41	0.0760644	0.0760644	199654	0	0
1	199656	199657	peak	1.67982	+	81	0.0209014	0.0209014	199656	0	0
1	199662	199663	peak	1.05452	+	37	0.0882021	0.0882021	199662	0	0
1	199674	199675	peak	4.23346	+	313	5.84169e-05	5.84169e-05	199674	0	0
1	199680	199681	peak	1.66377	+	80	0.0216885	0.0216885	199680	0	0
1	199684	199685	peak	1.96231	+	104	0.0109067	0.0109067	199684	0	0
1	199688	199689	peak	2.22027	+	126	0.00602189	0.00602189	199688	0	0
1	199716	199717	peak	4.92738	+	386	1.18202e-05	1.18202e-05	199716	0	0
1	199722	199723	peak	1.37625	+	59	0.0420488	0.0420488	199722	0	0
1	199723	199724	peak	2.09627	+	116	0.00801187	0.00801187	199723	0	0
1	219132	219133	peak	3.07754	+	203	0.00083649	0.00083649	219132	0	0
1	224270	224271	peak	1.27348	-	52	0.0532751	0.0532751	224270	0	0
1	224273	224274	peak	4.70597	-	364	1.96801e-05	1.96801e-05	224273	0	0
1	224288	224289	peak	1.04896	-	37	0.0893393	0.0893393	224288	0	0
1	224302	224303	peak	1.20698	-	47	0.0620894	0.0620894	224302	0	0
1	224314	224315	peak	3.5094	-	243	0.000309454	0.000309454	224314	0	0
1	227205	227206	peak	1.20193	-	49	0.0628161	0.0628161	227205	0	0
1	227224	227225	peak	1.5309	-	73	0.0294507	0.0294507	227224	0	0
1	227226	227227	peak	12.0085	-	1177	9.8066e-13	9.8066e-13	227226	0	0
1	227229	227230	peak	15.6536	-	1690	2.22045e-16	2.22045e-16	227229	0	0
1	227230	227231	peak	1.92249	-	104	0.011954	0.011954	227230	0	0
1	227233	227234	peak	inf	-	6071	0	0	227233	0	0
1	227236	227237	peak	inf	-	9300	0	0	227236	0	0
1	227237	227238	peak	3.07201	-	203	0.000847211	0.000847211	227237	0	0
1	227238	227239	peak	5.93106	-	486	1.17203e-06	1.17203e-06	227238	0	0
1	227239	227240	peak	11.1705	-	1037	6.75371e-12	6.75371e-12	227239	0	0
1	227240	227241	peak	1.87633	-	97	0.0132943	0.0132943	227240	0	0
1	227242	227243	peak	2.77613	-	175	0.00167443	0.00167443	227242	0	0
1	227301	227302	peak	4.77818	-	367	1.66657e-05	1.66657e-05	227301	0	0
1	227311	227312	peak	14.0355	-	1322	9.21485e-15	9.21485e-15	227311	0	0
1	227486	227487	peak	1.37113	-	58	0.0425467	0.0425467	227486	0	0
1	229045	229046	peak	1.3559	+	57	0.044066	0.044066	229045	0	0
1	229135	229136	peak	3.15697	+	210	0.000696681	0.000696681	229135	0	0
1	229162	229163	peak	2.52588	+	153	0.00297933	0.00297933	229162	0	0
1	229164	229165	peak	1.89528	+	99	0.0127267	0.0127267	229164	0	0
1	229167	229168	peak	1.06553	+	38	0.0859936	0.0859936	229167	0	0
1	229178	229179	peak	1.23199	+	49	0.0586148	0.0586148	229178	0	0
1	229180	229181	peak	1.18731	+	46	0.0649672	0.0649672	229180	0	0
1	237739	237740	peak	1.56041	-	72	0.0275166	0.0275166	237739	0	0
1	237744	237745	peak	1.19489	-	46	0.0638422	0.0638422	237744	0	0
1	258794	258795	peak	1.15008	+	43	0.0707817	0.0707817	258794	0	0
1	262887	262888	peak	1.13431	+	42	0.0733982	0.0733982	262887	0	0
1	262895	262896	peak	1.54842	+	71	0.0282865	0.0282865	262895	0	0
1	268329	268330	peak	8.02118	+	699	9.52409e-09	9.52409e-09	268329	0	0
1	268331	268332	peak	1.25385	+	50	0.0557377	0.0557377	268331	0	0
1	268336	268337	peak	2.02448	+	109	0.00945199	0.00945199	268336	0	0
1	268340	268341	peak	1.32597	+	55	0.0472092	0.0472092	268340	0	0
1	268342	268343	peak	1.41032	+	61	0.0388762	0.0388762	268342	0	0
1	268345	268346	peak	1.72764	+	85	0.0187222	0.0187222	268345	0	0
1	270724	270725	peak	1.05226	-	37	0.088662	0.088662	270724	0	0
1	270738	270739	peak	1.28136	-	52	0.0523171	0.0523171	270738	0	0
1	270746	270747	peak	1.17799	-	45	0.0663753	0.0663753	270746	0	0
1	270750	270751	peak	3.72646	-	264	0.000187731	0.000187731	270750	0	0
1	270752	270753	peak	1.68989	-	82	0.0204226	0.0204226	270752	0	0
1	270768	270769	peak	2.12169	-	117	0.00755637	0.00755637	270768	0	0
1	270774	270775	peak	2.85059	-	181	0.00141063	0.00141063	270774	0	0
1	270777	270778	peak	1.1347	-	42	0.0733323	0.0733323	270777	0	0
1	270963	270964	peak	1.78148	+	89	0.0165393	0.0165393	270963	0	0
1	270966	270967	peak	4.89657	+	378	1.26891e-05	1.26891e-05	270966	0	0
1	270997	270998	peak	1.98733	+	106	0.0102961	0.0102961	270997	0	0
1	271003	271004	peak	1.17734	+	45	0.0664757	0.0664757	271003	0	0
1	278603	278604	peak	1.21124	+	47	0.061484	0.061484	278603	0	0
1	282607	282608	peak	1.05445	+	37	0.0882164	0.0882164	282607	0	0
1	282753	282754	peak	1.10004	+	40	0.0794258	0.0794258	282753	0	0
1	282756	282757	peak	8.22954	+	726	5.89473e-09	5.89473e-09	282756	0	0
1	282759	282760	peak	6.04224	+	499	9.07314e-07	9.07314e-07	282759	0	0
1	282763	282764	peak	2.09467	+	116	0.0080414	0.0080414	282763	0	0
1	282813	282814	peak	2.25205	+	131	0.0055969	0.0055969	282813	0	0
1	293352	293353	peak	2.15974	+	120	0.00692249	0.00692249	293352	0	0
1	293367	293368	peak	5.32942	+	422	4.68364e-06	4.68364e-06	293367	0	0
1	293378	293379	peak	7.20308	+	616	6.26499e-08	6.26499e-08	293378	0	0
1	293380	293381	peak	6.06554	+	499	8.59916e-07	8.59916e-07	293380	0	0
1	293386	293387	peak	2.11466	+	117	0.00767957	0.00767957	293386	0	0
1	295215	295216	peak	1.8072	+	91	0.0155884	0.0155884	295215	0	0
1	298061	298062	peak	1.09944	-	40	0.0795353	0.0795353	298061	0	0
1	298068	298069	peak	1.89871	-	99	0.0126267	0.0126267	298068	0	0
1	298087	298088	peak	9.61714	-	869	2.41467e-10	2.41467e-10	298087	0	0
1	298093	298094	peak	1.26852	-	51	0.0538861	0.0538861	298093	0	0
1	298097	298098	peak	1.5866	-	74	0.0259062	0.0259062	298097	0	0
1	298103	298104	peak	2.0019	-	107	0.00995629	0.00995629	298103	0	0
1	298105	298106	peak	1.7427	-	86	0.0180844	0.0180844	298105	0	0
1	298108	298109	peak	1.2697	-	51	0.0537398	0.0537398	298108	0	0
1	302142	302143	peak	1.10274	-	40	0.0789336	0.0789336	302142	0	0
1	306281	306282	peak	1.62831	-	77	0.0235335	0.0235335	306281	0	0
1	315899	315900	peak	5.87601	-	477	1.33041e-06	1.33041e-06	315899	0	0
1	315901	315902	peak	2.78459	-	175	0.00164215	0.00164215	315901	0	0
1	315902	315903	peak	1.56269	-	72	0.0273723	0.0273723	315902	0	0
1	316172	316173	peak	1.07078	+	38	0.0849603	0.0849603	316172	0	0
1	316175	316176	peak	1.88095	+	97	0.0131538	0.0131538	316175	0	0
1	322871	322872	peak	1.16565	-	44	0.0682883	0.0682883	322871	0	0
1	323011	323012	peak	1.07122	+	38	0.0848755	0.0848755	323011	0	0
1	323026	323027	peak	2.38024	+	139	0.00416635	0.00416635	323026	0	0
1	323065	323066	peak	2.10481	+	116	0.00785571	0.00785571	323065	0	0
1	342049	342050	peak	1.31326	-	54	0.0486117	0.0486117	342049	0	0
1	344319	344320	peak	1.13268	-	42	0.0736755	0.0736755	344319	0	0
1	344327	344328	peak	1.05339	-	37	0.0884319	0.0884319	344327	0	0
1	344339	344340	peak	1.38367	-	59	0.0413358	0.0413358	344339	0	0
1	344340	344341	peak	1.70486	-	83	0.0197308	0.0197308	344340	0	0
1	344342	344343	peak	3.60935	-	252	0.000245838	0.000245838	344342	0	0
1	345863	345864	peak	2.82496	+	179	0.00149636	0.00149636	345863	0	0
1	345867	345868	peak	1.10146	+	40	0.0791659	0.0791659	345867	0	0
1	345870	345871	peak	1.65111	+	79	0.0223301	0.0223301	345870	0	0
1	345879	345880	peak	1.12887	+	42	0.0743242	0.0743242	345879	0	0
1	345909	345910	peak	1.44393	+	64	0.0359805	0.0359805	345909	0	0
1	358908	358909	peak	1.03852	-	36	0.0915115	0.0915115	358908	0	0
1	360495	360496	peak	1.07064	-	38	0.0849885	0.0849885	360495	0	0
1	360499	360500	peak	7.04738	-	597	8.96648e-08	8.96648e-08	360499	0	0
1	360501	360502	peak	1.75678	-	87	0.0175074	0.0175074	360501	0	0
1	365357	365358	peak	1.48146	+	66	0.0330021	0.0330021	365357	0	0
1	365474	365475	peak	1.16501	+	44	0.0683902	0.0683902	365474	0	0
1	365513	365514	peak	1.02059	+	35	0.0953691	0.0953691	365513	0	0
1	365566	365567	peak	2.07218	+	113	0.00846875	0.00846875	365566	0	0
1	365606	365607	peak	1.4078	+	61	0.0391017	0.0391017	365606	0	0
1	366731	366732	peak	1.15904	+	44	0.0693363	0.0693363	366731	0	0
1	370946	370947	peak	2.18201	-	122	0.00657645	0.00657645	370946	0	0
1	370959	370960	peak	1.071	-	38	0.0849179	0.0849179	370959	0	0
1	370966	370967	peak	1.60173	-	75	0.025019	0.025019	370966	0	0
1	371089	371090	peak	1.10289	-	40	0.0789063	0.0789063	371089	0	0
1	389641	389642	peak	2.39829	-	141	0.00399677	0.00399677	389641	0	0
1	389642	389643	peak	1.65176	-	79	0.0222969	0.0222969	389642	0	0
1	389644	389645	peak	1.60036	-	75	0.0250979	0.0250979	389644	0	0
1	389647	389648	peak	1.93091	-	101	0.0117243	0.0117243	389647	0	0
1	389814	389815	peak	2.34545	+	239	0.00451384	0.00451384	389814	0	0
1	395760	395761	peak	1.42532	+	62	0.037556	0.037556	395760	0	0
1	401823	401824	peak	1.41496	-	62	0.0384629	0.0384629	401823	0	0
1	401840	401841	peak	1.05205	-	37	0.0887052	0.0887052	401840	0	0
1	401842	401843	peak	1.43653	-	63	0.0365992	0.0365992	401842	0	0
1	401844	401845	peak	2.36314	-	138	0.0043337	0.0043337	401844	0	0
1	401846	401847	peak	1.53319	-	70	0.0292963	0.0292963	401846	0	0
1	401872	401873	peak	1.13424	-	42	0.0734114	0.0734114	401872	0	0
1	401879	401880	peak	1.42713	-	62	0.0373999	0.0373999	401879	0	0
1	404426	404427	peak	11.3713	-	1076	4.25304e-12	4.25304e-12	404426	0	0
1	404429	404430	peak	2.88006	-	187	0.00131806	0.00131806	404429	0	0
1	404432	404433	peak	13.8542	-	1333	1.39888e-14	1.39888e-14	404432	0	0
1	404434	404435	peak	1.78398	-	90	0.0164445	0.0164445	404434	0	0
1	404435	404436	peak	3.01668	-	198	0.000962313	0.000962313	404435	0	0
1	404437	404438	peak	6.03346	-	497	9.25855e-07	9.25855e-07	404437	0	0
1	404438	404439	peak	15.1095	-	1817	7.77156e-16	7.77156e-16	404438	0	0
1	408738	408739	peak	1.28486	+	52	0.0518966	0.0518966	408738	0	0
1	408744	408745	peak	1.89282	+	98	0.0127992	0.0127992	408744	0	0
1	408749	408750	peak	6.12333	+	503	7.52782e-07	7.52782e-07	408749	0	0
1	408753	408754	peak	1.16371	+	44	0.0685943	0.0685943	408753	0	0
1	408760	408761	peak	1.23777	+	49	0.0578402	0.0578402	408760	0	0
1	408767	408768	peak	1.39394	+	60	0.0403704	0.0403704	408767	0	0
1	410747	410748	peak	2.98158	+	193	0.00104332	0.00104332	410747	0	0
1	410748	410749	peak	2.11126	+	116	0.00774003	0.00774003	410748	0	0
1	410749	410750	peak	1.88033	+	97	0.0131725	0.0131725	410749	0	0
1	410752	410753	peak	6.39477	+	531	4.02934e-07	4.02934e-07	410752	0	0
1	410757	410758	peak	1.42405	+	62	0.0376664	0.0376664	410757	0	0
1	410785	410786	peak	2.92342	+	190	0.00119283	0.00119283	410785	0	0
1	410787	410788	peak	2.5819	+	159	0.00261878	0.00261878	410787	0	0
1	410790	410791	peak	2.34105	+	138	0.0045598	0.0045598	410790	0	0
1	410793	410794	peak	1.81038	+	93	0.0154746	0.0154746	410793	0	0
1	411758	411759	peak	1.10304	+	40	0.078879	0.078879	411758	0	0
1	411778	411779	peak	1.10274	+	40	0.0789336	0.0789336	411778	0	0
1	411796	411797	peak	1.19456	+	46	0.0638914	0.0638914	411796	0	0
1	411798	411799	peak	1.355	+	57	0.0441568	0.0441568	411798	0	0
1	414617	414618	peak	1.85559	-	95	0.0139448	0.0139448	414617	0	0
1	414640	414641	peak	1.44062	-	63	0.0362562	0.0362562	414640	0	0
1	414644	414645	peak	1.05502	-	37	0.0881016	0.0881016	414644	0	0
1	415073	415074	peak	2.63815	+	162	0.00230065	0.00230065	415073	0	0
1	415075	415076	peak	1.59937	+	75	0.0251553	0.0251553	415075	0	0
1	415078	415079	peak	1.82687	+	93	0.0148981	0.0148981	415078	0	0
1	415080	415081	peak	1.14564	+	43	0.0715092	0.0715092	415080	0	0
1	415083	415084	peak	1.40572	+	61	0.0392901	0.0392901	415083	0	0
1	415115	415116	peak	1.13997	+	43	0.0724494	0.0724494	415115	0	0
1	418763	418764	peak	1.50866	+	68	0.0309985	0.0309985	418763	0	0
1	418765	418766	peak	1.22562	+	48	0.0594815	0.0594815	418765	0	0
1	418774	418775	peak	1.31031	+	54	0.0489426	0.0489426	418774	0	0
1	418775	418776	peak	2.72261	+	171	0.00189405	0.00189405	418775	0	0
1	418777	418778	peak	4.17027	+	311	6.75667e-05	6.75667e-05	418777	0	0
1	418780	418781	peak	8.22743	+	737	5.92344e-09	5.92344e-09	418780	0	0
1	418782	418783	peak	4.70062	+	368	1.99242e-05	1.99242e-05	418782	0	0
1	418783	418784	peak	1.49915	+	69	0.0316848	0.0316848	418783	0	0
1	418785	418786	peak	2.22467	+	129	0.00596116	0.00596116	418785	0	0
1	446211	446212	peak	1.21081	-	47	0.0615444	0.0615444	446211	0	0
1	450405	450406	peak	1.92954	-	102	0.0117613	0.0117613	450405	0	0
1	450407	450408	peak	1.35084	-	57	0.0445818	0.0445818	450407	0	0
1	450412	450413	peak	2.74011	-	172	0.00181925	0.00181925	450412	0	0
1	450414	450415	peak	3.62674	-	255	0.00023619	0.00023619	450414	0	0
1	450425	450426	peak	15.2556	-	1921	5.55112e-16	5.55112e-16	450425	0	0
1	453219	453220	peak	2.02804	+	109	0.00937465	0.00937465	453219	0	0
1	455687	455688	peak	2.00441	+	107	0.0098989	0.0098989	455687	0	0
1	455707	455708	peak	1.399	+	60	0.0399021	0.0399021	455707	0	0
1	455709	455710	peak	2.64079	+	162	0.00228673	0.00228673	455709	0	0
1	455710	455711	peak	1.16533	+	44	0.0683392	0.0683392	455710	0	0
1	455740	455741	peak	2.32084	+	134	0.00477709	0.00477709	455740	0	0
1	455742	455743	peak	15.0003	+	1653	9.99201e-16	9.99201e-16	455742	0	0
1	455746	455747	peak	3.08162	+	203	0.000828662	0.000828662	455746	0	0
1	455751	455752	peak	1.22328	+	48	0.0598025	0.0598025	455751	0	0
1	455754	455755	peak	1.17791	+	45	0.0663878	0.0663878	455754	0	0
1	455764	455765	peak	1.88785	+	98	0.0129463	0.0129463	455764	0	0
1	455774	455775	peak	1.22069	+	48	0.0601602	0.0601602	455774	0	0
1	463559	463560	peak	2.95904	-	192	0.0010989	0.0010989	463559	0	0
1	463594	463595	peak	4.15478	-	305	7.00197e-05	7.00197e-05	463594	0	0
1	467751	467752	peak	1.13205	-	42	0.0737813	0.0737813	467751	0	0
1	467755	467756	peak	3.65259	-	257	0.000222541	0.000222541	467755	0	0
1	469805	469806	peak	1.07122	+	38	0.0848755	0.0848755	469805	0	0
1	471495	471496	peak	1.0536	-	37	0.0883888	0.0883888	471495	0	0
1	471497	471498	peak	1.41136	-	61	0.0387825	0.0387825	471497	0	0
1	477128	477129	peak	1.58856	+	74	0.0257892	0.0257892	477128	0	0
1	490871	490872	peak	2.20607	+	124	0.00622206	0.00622206	490871	0	0
1	490874	490875	peak	1.21056	+	47	0.0615807	0.0615807	490874	0	0
1	490924	490925	peak	1.7427	+	86	0.0180844	0.0180844	490924	0	0
1	490929	490930	peak	1.13338	+	42	0.0735566	0.0735566	490929	0	0
1	498516	498517	peak	1.84467	-	94	0.0142997	0.0142997	498516	0	0
1	513600	513601	peak	1.74242	-	86	0.018096	0.018096	513600	0	0
1	513606	513607	peak	1.1803	-	45	0.0660242	0.0660242	513606	0	0
1	515319	515320	peak	1.6622	-	80	0.021767	0.021767	515319	0	0
1	515342	515343	peak	1.98965	-	106	0.0102412	0.0102412	515342	0	0
1	515366	515367	peak	1.86797	-	96	0.0135527	0.0135527	515366	0	0
1	515372	515373	peak	1.78077	-	89	0.0165666	0.0165666	515372	0	0
1	515390	515391	peak	1.3281	-	55	0.0469789	0.0469789	515390	0	0
1	515398	515399	peak	2.05209	-	111	0.00886982	0.00886982	515398	0	0
1	515403	515404	peak	1.907	-	99	0.012388	0.012388	515403	0	0
1	518250	518251	peak	2.25342	+	128	0.00557931	0.00557931	518250	0	0
1	518253	518254	peak	inf	+	6164	0	0	518253	0	0
1	518258	518259	peak	2.18371	+	125	0.00655066	0.00655066	518258	0	0
1	518307	518308	peak	1.12249	+	44	0.0754233	0.0754233	518307	0	0
1	537868	537869	peak	1.53507	+	70	0.0291699	0.0291699	537868	0	0
1	537891	537892	peak	1.61297	+	76	0.0243799	0.0243799	537891	0	0
1	537894	537895	peak	1.23891	+	49	0.0576882	0.0576882	537894	0	0
1	537896	537897	peak	1.97524	+	105	0.0105868	0.0105868	537896	0	0
1	537897	537898	peak	3.04848	+	200	0.000894369	0.000894369	537897	0	0
1	537899	537900	peak	10.0861	+	924	8.20158e-11	8.20158e-11	537899	0	0
1	537904	537905	peak	1.70758	+	84	0.0196072	0.0196072	537904	0	0
1	537909	537910	peak	1.43139	+	63	0.0370351	0.0370351	537909	0	0
1	537910	537911	peak	1.17357	+	45	0.0670548	0.0670548	537910	0	0
1	555956	555957	peak	1.84242	-	94	0.014374	0.014374	555956	0	0
1	555973	555974	peak	5.5116	-	440	3.07891e-06	3.07891e-06	555973	0	0
1	555977	555978	peak	1.24023	-	49	0.0575131	0.0575131	555977	0	0
1	555984	555985	peak	11.6969	-	1087	2.00961e-12	2.00961e-12	555984	0	0
1	555988	555989	peak	3.05801	-	200	0.000874973	0.000874973	555988	0	0
1	556015	556016	peak	2.19527	-	123	0.00637865	0.00637865	556015	0	0
1	564202	564203	peak	3.42168	+	234	0.000378722	0.000378722	564202	0	0
1	564204	564205	peak	4.03666	+	293	9.19047e-05	9.19047e-05	564204	0	0
1	564213	564214	peak	1.99214	+	106	0.0101826	0.0101826	564213	0	0
1	574943	574944	peak	1.22562	-	48	0.0594815	0.0594815	574943	0	0
1	574980	574981	peak	1.07122	-	38	0.0848755	0.0848755	574980	0	0
1	580644	580645	peak	1.05502	+	37	0.0881016	0.0881016	580644	0	0
1	580646	580647	peak	1.67996	+	81	0.020895	0.020895	580646	0	0
1	580648	580649	peak	2.2291	+	126	0.00590064	0.00590064	580648	0	0
1	580650	580651	peak	1.29892	+	53	0.0502438	0.0502438	580650	0	0
1	580656	580657	peak	2.46917	+	147	0.00339493	0.00339493	580656	0	0
1	580659	580660	peak	1.25394	+	50	0.0557262	0.0557262	580659	0	0
1	580663	580664	peak	2.64666	+	163	0.00225603	0.00225603	580663	0	0
1	591916	591917	peak	1.2844	+	52	0.0519519	0.0519519	591916	0	0
1	602496	602497	peak	1.58905	+	74	0.02576	0.02576	602496	0	0
1	602536	602537	peak	2.18276	+	122	0.00656511	0.00656511	602536	0	0
1	602552	602553	peak	1.21004	+	47	0.0616532	0.0616532	602552	0	0
1	609420	609421	peak	1.1329	-	46	0.0736372	0.0736372	609420	0	0
1	609422	609423	peak	5.49737	-	483	3.18146e-06	3.18146e-06	609422	0	0
1	609423	609424	peak	9.70528	-	954	1.97116e-10	1.97116e-10	609423	0	0
1	609425	609426	peak	13.165	-	1340	6.83897e-14	6.83897e-14	609425	0	0
1	609426	609427	peak	2.90225	-	198	0.00125242	0.00125242	609426	0	0
1	609427	609428	peak	4.95116	-	409	1.11902e-05	1.11902e-05	609427	0	0
1	609429	609430	peak	7.84666	-	714	1.42345e-08	1.42345e-08	609429	0	0
1	609430	609431	peak	3.23376	-	226	0.000583771	0.000583771	609430	0	0
1	609432	609433	peak	4.79108	-	383	1.61777e-05	1.61777e-05	609432	0	0
1	609433	609434	peak	inf	-	3047	0	0	609433	0	0
1	612278	612279	peak	1.84331	-	100	0.0143448	0.0143448	612278	0	0
1	612281	612282	peak	2.92213	-	200	0.00119638	0.00119638	612281	0	0
1	612287	612288	peak	2.85684	-	189	0.00139047	0.00139047	612287	0	0
1	612293	612294	peak	inf	-	18646	0	0	612293	0	0
1	612294	612295	peak	3.24168	-	218	0.000573216	0.000573216	612294	0	0
1	612296	612297	peak	5.37026	-	427	4.26327e-06	4.26327e-06	612296	0	0
1	612297	612298	peak	1.13275	-	42	0.0736623	0.0736623	612297	0	0
1	612298	612299	peak	9.02059	-	805	9.53692e-10	9.53692e-10	612298	0	0
1	612319	612320	peak	2.10008	-	115	0.00794191	0.00794191	612319	0	0
1	616187	616188	peak	1.57547	-	73	0.0265785	0.0265785	616187	0	0
1	620677	620678	peak	2.56251	+	155	0.00273833	0.00273833	620677	0	0
1	620683	620684	peak	2.66117	+	164	0.00218187	0.00218187	620683	0	0
1	620720	620721	peak	2.14942	+	120	0.00708884	0.00708884	620720	0	0
1	621521	621522	peak	1.4122	+	61	0.0387076	0.0387076	621521	0	0
1	621552	621553	peak	1.19498	+	46	0.0638299	0.0638299	621552	0	0
1	621556	621557	peak	1.60049	+	75	0.0250907	0.0250907	621556	0	0
1	621590	621591	peak	2.96237	+	192	0.00109051	0.00109051	621590	0	0
1	621594	621595	peak	2.0566	+	112	0.00877802	0.00877802	621594	0	0
1	621617	621618	peak	1.01796	+	35	0.0959489	0.0959489	621617	0	0
1	626748	626749	peak	1.27034	+	51	0.053661	0.053661	626748	0	0
1	626774	626775	peak	1.49469	+	67	0.0320119	0.0320119	626774	0	0
1	626779	626780	peak	10.1593	+	925	6.92961e-11	6.92961e-11	626779	0	0
1	626784	626785	peak	1.92566	+	101	0.0118669	0.0118669	626784	0	0
1	626787	626788	peak	3.82316	+	274	0.000150259	0.000150259	626787	0	0
1	626792	626793	peak	2.73835	+	172	0.00182663	0.00182663	626792	0	0
1	630511	630512	peak	1.54854	+	71	0.0282788	0.0282788	630511	0	0
1	630517	630518	peak	2.02685	+	109	0.00940038	0.00940038	630517	0	0
1	635121	635122	peak	1.99247	+	106	0.0101749	0.0101749	635121	0	0
1	635283	635284	peak	1.46827	+	65	0.0340193	0.0340193	635283	0	0
1	635332	635333	peak	1.48168	+	66	0.0329851	0.0329851	635332	0	0
1	638645	638646	peak	2.44471	-	145	0.00359161	0.00359161	638645	0	0
1	638647	638648	peak	4.22759	-	312	5.92118e-05	5.92118e-05	638647	0	0
1	638653	638654	peak	1.65422	-	79	0.0221707	0.0221707	638653	0	0
1	644531	644532	peak	1.02134	-	35	0.0952058	0.0952058	644531	0	0
1	644559	644560	peak	1.46761	-	65	0.0340714	0.0340714	644559	0	0
1	644562	644563	peak	1.02181	-	35	0.0951019	0.0951019	644562	0	0
1	654367	654368	peak	2.1118	-	116	0.00773045	0.00773045	654367	0	0
1	658143	658144	peak	3.50473	-	242	0.000312802	0.000312802	658143	0	0
1	658147	658148	peak	1.13455	-	42	0.0733587	0.0733587	658147	0	0
1	662265	662266	peak	1.08698	-	39	0.0818506	0.0818506	662265	0	0
1	692559	692560	peak	1.03859	-	36	0.0914969	0.0914969	692559	0	0
1	701470	701471	peak	1.24103	+	49	0.0574082	0.0574082	701470	0	0
1	706626	706627	peak	1.81839	-	92	0.0151917	0.0151917	706626	0	0
1	706630	706631	peak	2.27572	-	130	0.00530011	0.00530011	706630	0	0
1	707531	707532	peak	1.44051	+	63	0.0362652	0.0362652	707531	0	0
1	707552	707553	peak	1.85408	+	95	0.0139934	0.0139934	707552	0	0
1	729934	729935	peak	1.95503	+	103	0.0110911	0.0110911	729934	0	0
1	739677	739678	peak	10.5492	+	964	2.82382e-11	2.82382e-11	739677	0	0
1	739679	739680	peak	1.58893	+	74	0.0257673	0.0257673	739679	0	0
1	739685	739686	peak	1.05487	+	37	0.0881303	0.0881303	739685	0	0
1	739686	739687	peak	15.0515	+	1551	8.88178e-16	8.88178e-16	739686	0	0
1	749280	749281	peak	1.37073	+	58	0.0425863	0.0425863	749280	0	0
1	752249	752250	peak	1.21107	+	47	0.0615082	0.0615082	752249	0	0
1	754141	754142	peak	1.0849	-	43	0.0822434	0.0822434	754141	0	0
1	754151	754152	peak	3.80377	-	292	0.00015712	0.00015712	754151	0	0
1	754160	754161	peak	inf	-	2224	0	0	754160	0	0
1	754171	754172	peak	1.70972	-	87	0.0195112	0.0195112	754171	0	0
1	754172	754173	peak	inf	-	8519	0	0	754172	0	0
1	754173	754174	peak	1.1184	-	42	0.0761373	0.0761373	754173	0	0
1	754174	754175	peak	15.9546	-	13517	1.11022e-16	1.11022e-16	754174	0	0
1	754175	754176	peak	inf	-	1547	0	0	754175	0	0
1	754176	754177	peak	2.41105	-	143	0.00388107	0.00388107	754176	0	0
1	754179	754180	peak	3.76591	-	269	0.000171432	0.000171432	754179	0	0
1	754187	754188	peak	3.53566	-	246	0.000291298	0.000291298	754187	0	0
1	754193	754194	peak	6.16873	-	508	6.78062e-07	6.78062e-07	754193	0	0
1	754198	754199	peak	2.4355	-	144	0.00366861	0.00366861	754198	0	0
1	754199	754200	peak	1.24006	-	49	0.0575364	0.0575364	754199	0	0
1	754203	754204	peak	5.83609	-	473	1.4585e-06	1.4585e-06	754203	0	0
1	754305	754306	peak	1.07115	-	38	0.0848897	0.0848897	754305	0	0
1	756261	756262	peak	1.17775	-	45	0.0664129	0.0664129	756261	0	0
1	756264	756265	peak	3.32721	-	226	0.000470751	0.000470751	756264	0	0
1	756268	756269	peak	2.07341	-	113	0.00844489	0.00844489	756268	0	0
1	756271	756272	peak	1.45316	-	64	0.0352238	0.0352238	756271	0	0
1	756282	756283	peak	2.65123	-	163	0.00223239	0.00223239	756282	0	0
1	756285	756286	peak	1.97968	-	105	0.010479	0.010479	756285	0	0
1	756292	756293	peak	1.29939	-	53	0.0501896	0.0501896	756292	0	0
1	756302	756303	peak	1.27043	-	51	0.0536498	0.0536498	756302	0	0
1	756415	756416	peak	2.50584	+	150	0.00312006	0.00312006	756415	0	0
1	756416	756417	peak	2.03973	+	110	0.0091257	0.0091257	756416	0	0
1	756417	756418	peak	2.63815	+	162	0.00230065	0.00230065	756417	0	0
1	756426	756427	peak	1.81575	+	92	0.0152846	0.0152846	756426	0	0
1	756429	756430	peak	1.3252	+	55	0.0472931	0.0472931	756429	0	0
1	756446	756447	peak	1.43492	+	63	0.0367351	0.0367351	756446	0	0
1	761282	761283	peak	1.34248	+	56	0.0454485	0.0454485	761282	0	0
1	761284	761285	peak	1.56161	+	72	0.0274406	0.0274406	761284	0	0
1	769631	769632	peak	1.85695	+	95	0.0139011	0.0139011	769631	0	0
1	782919	782920	peak	1.68022	+	81	0.0208822	0.0208822	782919	0	0
1	782939	782940	peak	1.73026	+	85	0.0186097	0.0186097	782939	0	0
1	787123	787124	peak	6.42848	+	533	3.72836e-07	3.72836e-07	787123	0	0
1	787126	787127	peak	2.84014	+	180	0.00144498	0.00144498	787126	0	0
1	790070	790071	peak	1.07115	+	38	0.0848897	0.0848897	790070	0	0
1	795339	795340	peak	1.70472	-	83	0.0197369	0.0197369	795339	0	0
1	798457	798458	peak	1.19581	-	46	0.0637068	0.0637068	798457	0	0
1	803067	803068	peak	2.6938	+	167	0.00202395	0.00202395	803067	0	0
1	807378	807379	peak	1.41252	+	61	0.0386795	0.0386795	807378	0	0
1	807391	807392	peak	1.60024	+	75	0.0251051	0.0251051	807391	0	0
1	807397	807398	peak	1.53342	+	70	0.0292805	0.0292805	807397	0	0
1	807402	807403	peak	5.01541	+	391	9.65136e-06	9.65136e-06	807402	0	0
1	807427	807428	peak	1.08323	+	39	0.08256	0.08256	807427	0	0
1	819346	819347	peak	1.18581	-	46	0.0651908	0.0651908	819346	0	0
1	819362	819363	peak	1.31973	-	55	0.047893	0.047893	819362	0	0
1	819366	819367	peak	1.86899	-	97	0.0135211	0.0135211	819366	0	0
1	819370	819371	peak	2.15672	-	121	0.00697074	0.00697074	819370	0	0
1	819372	819373	peak	1.809	-	92	0.0155237	0.0155237	819372	0	0
1	819375	819376	peak	2.27542	-	131	0.00530372	0.00530372	819375	0	0
1	819408	819409	peak	1.80545	-	91	0.0156514	0.0156514	819408	0	0
1	819413	819414	peak	5.46394	-	435	3.43605e-06	3.43605e-06	819413	0	0
1	824404	824405	peak	1.82001	-	92	0.0151351	0.0151351	824404	0	0
1	824536	824537	peak	1.49537	+	67	0.0319618	0.0319618	824536	0	0
1	824545	824546	peak	2.22929	+	126	0.00589803	0.00589803	824545	0	0
1	826573	826574	peak	1.7822	+	89	0.0165121	0.0165121	826573	0	0
1	844165	844166	peak	1.22614	-	48	0.0594103	0.0594103	844165	0	0
1	846814	846815	peak	1.17709	+	45	0.0665134	0.0665134	846814	0	0
1	846832	846833	peak	1.55609	+	72	0.0277913	0.0277913	846832	0	0
1	847712	847713	peak	1.83013	-	93	0.0147866	0.0147866	847712	0	0
1	847874	847875	peak	1.32829	+	55	0.046958	0.046958	847874	0	0
1	847879	847880	peak	1.14976	+	43	0.0708335	0.0708335	847879	0	0
1	847906	847907	peak	1.49446	+	67	0.0320286	0.0320286	847906	0	0
1	864075	864076	peak	1.93139	-	101	0.0117114	0.0117114	864075	0	0
1	867744	867745	peak	1.07115	-	38	0.0848897	0.0848897	867744	0	0
1	871183	871184	peak	1.22233	-	48	0.0599335	0.0599335	871183	0	0
1	871198	871199	peak	2.75718	-	173	0.00174913	0.00174913	871198	0	0
1	871201	871202	peak	5.74074	-	464	1.81662e-06	1.81662e-06	871201	0	0
1	875897	875898	peak	2.82993	-	179	0.00147933	0.00147933	875897	0	0
1	875899	875900	peak	1.03873	-	36	0.0914677	0.0914677	875899	0	0
1	887867	887868	peak	1.0705	-	38	0.0850168	0.0850168	887867	0	0
1	897400	897401	peak	2.54621	-	154	0.00284309	0.00284309	897400	0	0
1	897408	897409	peak	1.23926	-	49	0.0576415	0.0576415	897408	0	0
1	897583	897584	peak	1.24111	-	49	0.0573965	0.0573965	897583	0	0
1	898826	898827	peak	1.39849	+	60	0.0399498	0.0399498	898826	0	0
1	898863	898864	peak	2.66044	+	164	0.00218553	0.00218553	898863	0	0
1	898865	898866	peak	1.23962	+	49	0.0575948	0.0575948	898865	0	0
1	898868	898869	peak	1.02093	+	35	0.0952949	0.0952949	898868	0	0
1	898872	898873	peak	1.2688	+	51	0.0538523	0.0538523	898872	0	0
1	898874	898875	peak	3.55309	+	247	0.000279837	0.000279837	898874	0	0
1	898878	898879	peak	2.08497	+	114	0.0082229	0.0082229	898878	0	0
1	898879	898880	peak	4.49265	+	339	3.21624e-05	3.21624e-05	898879	0	0
1	898882	898883	peak	5.06034	+	396	8.70279e-06	8.70279e-06	898882	0	0
1	898884	898885	peak	1.9731	+	105	0.0106389	0.0106389	898884	0	0
1	898887	898888	peak	2.42623	+	144	0.00374773	0.00374773	898887	0	0
1	898890	898891	peak	14.9546	+	1925	1.11022e-15	1.11022e-15	898890	0	0
1	898892	898893	peak	1.11218	+	41	0.0772357	0.0772357	898892	0	0
1	898894	898895	peak	1.25805	+	51	0.0552011	0.0552011	898894	0	0
1	898898	898899	peak	1.59393	+	76	0.0254725	0.0254725	898898	0	0
1	898899	898900	peak	inf	+	1444	0	0	898899	0	0
1	898900	898901	peak	1.40616	+	62	0.0392498	0.0392498	898900	0	0
1	898901	898902	peak	1.41886	+	63	0.0381191	0.0381191	898901	0	0
1	898902	898903	peak	1.16399	+	45	0.0685504	0.0685504	898902	0	0
1	898903	898904	peak	2.50122	+	154	0.00315344	0.00315344	898903	0	0
1	898904	898905	peak	1.95103	+	106	0.0111936	0.0111936	898904	0	0
1	898906	898907	peak	2.47562	+	153	0.00334489	0.00334489	898906	0	0
1	898909	898910	peak	1.12658	+	43	0.0747167	0.0747167	898909	0	0
1	898911	898912	peak	1.53793	+	73	0.028978	0.028978	898911	0	0
1	898914	898915	peak	1.47213	+	68	0.0337188	0.0337188	898914	0	0
1	898915	898916	peak	1.09462	+	41	0.0804225	0.0804225	898915	0	0
1	898917	898918	peak	1.10838	+	42	0.0779145	0.0779145	898917	0	0
1	898926	898927	peak	2.06646	+	118	0.00858097	0.00858097	898926	0	0
1	900734	900735	peak	3.56989	+	248	0.000269223	0.000269223	900734	0	0
1	900737	900738	peak	1.49526	+	67	0.0319701	0.0319701	900737	0	0
1	900740	900741	peak	1.14992	+	43	0.0708076	0.0708076	900740	0	0
1	900764	900765	peak	1.3847	+	59	0.0412387	0.0412387	900764	0	0
1	900812	900813	peak	1.26807	+	51	0.0539425	0.0539425	900812	0	0
1	900816	900817	peak	1.05304	+	37	0.0885038	0.0885038	900816	0	0
1	901101	901102	peak	1.14952	+	43	0.0708724	0.0708724	901101	0	0
1	901180	901181	peak	1.66521	+	80	0.0216168	0.0216168	901180	0	0
1	906567	906568	peak	1.05149	-	61	0.0888197	0.0888197	906567	0	0
1	907646	907647	peak	1.18071	+	45	0.0659616	0.0659616	907646	0	0
1	907651	907652	peak	1.74353	+	86	0.0180496	0.0180496	907651	0	0
1	907652	907653	peak	2.06355	+	112	0.00863875	0.00863875	907652	0	0
1	907653	907654	peak	1.49435	+	67	0.0320369	0.0320369	907653	0	0
1	907656	907657	peak	6.58236	+	551	2.61599e-07	2.61599e-07	907656	0	0
1	911158	911159	peak	1.02154	-	35	0.0951613	0.0951613	911158	0	0
1	911192	911193	peak	2.02821	-	109	0.00937098	0.00937098	911192	0	0
1	917908	917909	peak	2.2244	-	131	0.00596482	0.00596482	917908	0	0
1	917910	917911	peak	2.03603	-	114	0.00920381	0.00920381	917910	0	0
1	917913	917914	peak	5.15268	-	419	7.03594e-06	7.03594e-06	917913	0	0
1	917917	917918	peak	1.22004	-	49	0.0602503	0.0602503	917917	0	0
1	917919	917920	peak	5.63583	-	466	2.31297e-06	2.31297e-06	917919	0	0
1	917930	917931	peak	1.11878	-	42	0.0760703	0.0760703	917930	0	0
1	917937	917938	peak	3.17362	-	216	0.000670472	0.000670472	917937	0	0
1	917943	917944	peak	2.82991	-	184	0.0014794	0.0014794	917943	0	0
1	917946	917947	peak	1.28137	-	53	0.0523156	0.0523156	917946	0	0
1	917966	917967	peak	2.11938	-	119	0.00759663	0.00759663	917966	0	0
1	917969	917970	peak	1.13785	-	43	0.0728034	0.0728034	917969	0	0
1	917975	917976	peak	6.57189	-	559	2.67982e-07	2.67982e-07	917975	0	0
1	917982	917983	peak	6.50649	-	551	3.11537e-07	3.11537e-07	917982	0	0
1	917990	917991	peak	1.5922	-	75	0.0255743	0.0255743	917990	0	0
1	917997	917998	peak	6.05726	-	500	8.76477e-07	8.76477e-07	917997	0	0
1	917999	918000	peak	1.0339	-	36	0.0924912	0.0924912	917999	0	0
1	918008	918009	peak	1.09907	-	40	0.0796038	0.0796038	918008	0	0
1	918013	918014	peak	1.43567	-	63	0.0366717	0.0366717	918013	0	0
1	918017	918018	peak	6.34613	-	526	4.50679e-07	4.50679e-07	918017	0	0
1	918021	918022	peak	1.03769	-	36	0.0916867	0.0916867	918021	0	0
1	918047	918048	peak	2.55056	-	154	0.00281475	0.00281475	918047	0	0
1	918053	918054	peak	1.16549	-	44	0.0683137	0.0683137	918053	0	0
1	923422	923423	peak	1.42649	+	62	0.0374549	0.0374549	923422	0	0
1	923425	923426	peak	2.42388	+	143	0.00376804	0.00376804	923425	0	0
1	923427	923428	peak	1.07006	+	38	0.0851015	0.0851015	923427	0	0
1	931593	931594	peak	1.13237	-	42	0.0737284	0.0737284	931593	0	0
1	931605	931606	peak	1.1789	-	45	0.0662372	0.0662372	931605	0	0
1	931653	931654	peak	1.61448	-	76	0.0242954	0.0242954	931653	0	0
1	943399	943400	peak	1.24103	-	49	0.0574082	0.0574082	943399	0	0
1	943401	943402	peak	1.25582	-	50	0.0554855	0.0554855	943401	0	0
1	960727	960728	peak	1.65435	-	79	0.0221641	0.0221641	960727	0	0
1	977760	977761	peak	1.44083	-	63	0.0362382	0.0362382	977760	0	0
1	981844	981845	peak	2.72012	-	171	0.00190495	0.00190495	981844	0	0
1	981858	981859	peak	2.48961	-	149	0.00323883	0.00323883	981858	0	0
1	981866	981867	peak	3.90778	-	281	0.000123657	0.000123657	981866	0	0
1	981870	981871	peak	2.1109	-	116	0.00774642	0.00774642	981870	0	0
1	981884	981885	peak	1.22623	-	48	0.0593984	0.0593984	981884	0	0
1	983398	983399	peak	2.52257	-	152	0.00300215	0.00300215	983398	0	0
1	983403	983404	peak	4.57712	-	347	2.64777e-05	2.64777e-05	983403	0	0
1	991138	991139	peak	1.18096	+	45	0.065924	0.065924	991138	0	0
1	991168	991169	peak	1.16533	+	44	0.0683392	0.0683392	991168	0	0
1	991193	991194	peak	1.2251	+	48	0.0595528	0.0595528	991193	0	0
1	991197	991198	peak	1.75495	+	87	0.0175812	0.0175812	991197	0	0
1	991208	991209	peak	2.51152	+	151	0.00307947	0.00307947	991208	0	0
1	991210	991211	peak	1.62413	+	77	0.0237615	0.0237615	991210	0	0
1	991216	991217	peak	2.11754	+	117	0.00762886	0.00762886	991216	0	0
1	991218	991219	peak	1.13182	+	42	0.0738209	0.0738209	991218	0	0
1	991220	991221	peak	2.66574	+	165	0.00215903	0.00215903	991220	0	0
1	991227	991228	peak	1.17684	+	45	0.0665511	0.0665511	991227	0	0
1	996114	996115	peak	1.02222	+	35	0.0950129	0.0950129	996114	0	0
1	996117	996118	peak	4.09459	+	299	8.04291e-05	8.04291e-05	996117	0	0
1	996120	996121	peak	1.76759	+	88	0.017077	0.017077	996120	0	0
1	1008508	1008509	peak	2.87331	+	183	0.00133871	0.00133871	1008508	0	0
1	1013327	1013328	peak	1.18054	-	45	0.0659866	0.0659866	1013327	0	0
1	1018101	1018102	peak	1.16785	+	74	0.0679442	0.0679442	1018101	0	0
1	1018106	1018107	peak	1.79392	+	90	0.0160724	0.0160724	1018106	0	0
1	1018109	1018110	peak	1.62755	+	77	0.0235749	0.0235749	1018109	0	0
1	1018159	1018160	peak	1.2238	+	48	0.0597311	0.0597311	1018159	0	0
1	1029106	1029107	peak	1.6402	-	78	0.0228983	0.0228983	1029106	0	0
1	1043857	1043858	peak	2.21702	-	125	0.00606709	0.00606709	1043857	0	0
1	1043861	1043862	peak	1.80676	-	91	0.0156041	0.0156041	1043861	0	0
1	1043863	1043864	peak	2.45978	-	146	0.00346909	0.00346909	1043863	0	0
1	1051155	1051156	peak	1.05043	-	37	0.0890364	0.0890364	1051155	0	0
1	1051176	1051177	peak	1.77876	-	89	0.0166432	0.0166432	1051176	0	0
1	1051181	1051182	peak	1.97787	-	105	0.0105228	0.0105228	1051181	0	0
1	1051188	1051189	peak	2.36834	-	138	0.0042821	0.0042821	1051188	0	0
1	1051379	1051380	peak	1.22319	+	48	0.0598144	0.0598144	1051379	0	0
1	1059467	1059468	peak	1.13463	+	42	0.0733455	0.0733455	1059467	0	0
1	1080533	1080534	peak	1.10199	-	40	0.0790702	0.0790702	1080533	0	0
1	1080553	1080554	peak	1.35629	-	57	0.0440256	0.0440256	1080553	0	0
1	1097028	1097029	peak	1.14976	+	43	0.0708335	0.0708335	1097028	0	0
1	1097029	1097030	peak	1.29882	+	53	0.0502546	0.0502546	1097029	0	0
1	1097034	1097035	peak	1.80268	+	91	0.0157515	0.0157515	1097034	0	0
1	1097075	1097076	peak	1.5647	+	73	0.027246	0.027246	1097075	0	0
1	1108658	1108659	peak	2.19094	-	123	0.00644265	0.00644265	1108658	0	0
1	1108663	1108664	peak	1.11805	-	41	0.0761986	0.0761986	1108663	0	0
1	1108674	1108675	peak	1.10266	-	40	0.0789472	0.0789472	1108674	0	0
1	1108686	1108687	peak	1.31383	-	54	0.0485478	0.0485478	1108686	0	0
1	1125549	1125550	peak	2.08868	+	114	0.00815298	0.00815298	1125549	0	0
1	1125560	1125561	peak	1.19581	+	46	0.0637068	0.0637068	1125560	0	0
1	1129414	1129415	peak	3.22812	-	216	0.000591396	0.000591396	1129414	0	0
1	1136299	1136300	peak	1.05459	+	37	0.0881877	0.0881877	1136299	0	0
1	1141316	1141317	peak	1.08433	-	39	0.0823511	0.0823511	1141316	0	0
1	1141322	1141323	peak	1.10056	-	40	0.07933	0.07933	1141322	0	0
1	1141347	1141348	peak	1.41105	-	61	0.0388106	0.0388106	1141347	0	0
1	1141358	1141359	peak	2.90397	-	186	0.00124746	0.00124746	1141358	0	0
1	1141364	1141365	peak	2.86076	-	182	0.00137798	0.00137798	1141364	0	0
1	1141368	1141369	peak	1.60198	-	75	0.0250047	0.0250047	1141368	0	0
1	1141369	1141370	peak	1.25582	-	50	0.0554855	0.0554855	1141369	0	0
1	1141370	1141371	peak	1.70594	-	83	0.0196817	0.0196817	1141370	0	0
1	1141373	1141374	peak	1.08713	-	39	0.0818228	0.0818228	1141373	0	0
1	1143019	1143020	peak	1.91958	-	118	0.0120343	0.0120343	1143019	0	0
1	1143023	1143024	peak	1.55646	-	82	0.0277679	0.0277679	1143023	0	0
1	1143037	1143038	peak	3.13292	-	226	0.000736339	0.000736339	1143037	0	0
1	1143039	1143040	peak	13.8406	-	1434	1.44329e-14	1.44329e-14	1143039	0	0
1	1143042	1143043	peak	14.1033	-	1386	7.88258e-15	7.88258e-15	1143042	0	0
1	1143044	1143045	peak	6.19769	-	530	6.34329e-07	6.34329e-07	1143044	0	0
1	1143050	1143051	peak	inf	-	3675	0	0	1143050	0	0
1	1145708	1145709	peak	1.39538	-	60	0.0402363	0.0402363	1145708	0	0
1	1146649	1146650	peak	1.02195	-	35	0.0950723	0.0950723	1146649	0	0
1	1146684	1146685	peak	1.99214	-	106	0.0101826	0.0101826	1146684	0	0
1	1146686	1146687	peak	1.31421	-	54	0.0485053	0.0485053	1146686	0	0
1	1148379	1148380	peak	1.71356	-	84	0.0193394	0.0193394	1148379	0	0
1	1148381	1148382	peak	1.43664	-	63	0.0365902	0.0365902	1148381	0	0
1	1148397	1148398	peak	2.02143	-	109	0.00951864	0.00951864	1148397	0	0
1	1148414	1148415	peak	1.53237	-	70	0.0293517	0.0293517	1148414	0	0
1	1148450	1148451	peak	1.20911	-	47	0.0617863	0.0617863	1148450	0	0
1	1148528	1148529	peak	1.25519	-	50	0.0555657	0.0555657	1148528	0	0
1	1154580	1154581	peak	1.16493	-	44	0.0684029	0.0684029	1154580	0	0
1	1164810	1164811	peak	1.23716	-	49	0.0579221	0.0579221	1164810	0	0
1	1164813	1164814	peak	1.78944	-	90	0.0162389	0.0162389	1164813	0	0
1	1164816	1164817	peak	1.6502	-	79	0.0223768	0.0223768	1164816	0	0
1	1164849	1164850	peak	1.16517	-	44	0.0683647	0.0683647	1164849	0	0
1	1164850	1164851	peak	1.2109	-	47	0.0615323	0.0615323	1164850	0	0
1	1164851	1164852	peak	1.16533	-	44	0.0683392	0.0683392	1164851	0	0
1	1165273	1165274	peak	1.06963	+	38	0.0851863	0.0851863	1165273	0	0
1	1188308	1188309	peak	1.13237	-	42	0.0737284	0.0737284	1188308	0	0
1	1188315	1188316	peak	1.06927	-	38	0.085257	0.085257	1188315	0	0
1	1188331	1188332	peak	1.4524	-	64	0.0352857	0.0352857	1188331	0	0
1	1188334	1188335	peak	1.02093	-	35	0.0952949	0.0952949	1188334	0	0
1	1188340	1188341	peak	3.30146	-	223	0.000499503	0.000499503	1188340	0	0
1	1188342	1188343	peak	2.79407	-	176	0.0016067	0.0016067	1188342	0	0
1	1188400	1188401	peak	1.45415	-	64	0.0351442	0.0351442	1188400	0	0
1	1188406	1188407	peak	1.02188	-	35	0.0950871	0.0950871	1188406	0	0
1	1191314	1191315	peak	1.84687	-	99	0.0142276	0.0142276	1191314	0	0
1	1191318	1191319	peak	1.71756	-	88	0.0191621	0.0191621	1191318	0	0
1	1191341	1191342	peak	1.46667	-	66	0.0341451	0.0341451	1191341	0	0
1	1191348	1191349	peak	7.34522	-	635	4.51622e-08	4.51622e-08	1191348	0	0
1	1191351	1191352	peak	4.38853	-	330	4.08766e-05	4.08766e-05	1191351	0	0
1	1191352	1191353	peak	8.11809	-	711	7.61916e-09	7.61916e-09	1191352	0	0
1	1191358	1191359	peak	4.22327	-	312	5.98042e-05	5.98042e-05	1191358	0	0
1	1191388	1191389	peak	3.06765	-	201	0.000855758	0.000855758	1191388	0	0
1	1191588	1191589	peak	1.13416	+	42	0.0734246	0.0734246	1191588	0	0
1	1191591	1191592	peak	2.89332	+	185	0.00127844	0.00127844	1191591	0	0
1	1191597	1191598	peak	1.84332	+	94	0.0143442	0.0143442	1191597	0	0
1	1191602	1191603	peak	1.17964	+	45	0.0661244	0.0661244	1191602	0	0
1	1191612	1191613	peak	3.1034	+	205	0.000788142	0.000788142	1191612	0	0
1	1191614	1191615	peak	1.20826	+	47	0.0619075	0.0619075	1191614	0	0
1	1198260	1198261	peak	1.20741	+	47	0.0620287	0.0620287	1198260	0	0
1	1202283	1202284	peak	1.13408	+	42	0.0734378	0.0734378	1202283	0	0
1	1214661	1214662	peak	1.79334	-	90	0.0160938	0.0160938	1214661	0	0
1	1216093	1216094	peak	1.22449	+	48	0.059636	0.059636	1216093	0	0
1	1216096	1216097	peak	9.38169	+	845	4.15248e-10	4.15248e-10	1216096	0	0
1	1216097	1216098	peak	5.36339	+	431	4.33125e-06	4.33125e-06	1216097	0	0
1	1216099	1216100	peak	1.37019	+	59	0.0426397	0.0426397	1216099	0	0
1	1216102	1216103	peak	2.17595	+	124	0.00666876	0.00666876	1216102	0	0
1	1216105	1216106	peak	1.44888	+	65	0.0355733	0.0355733	1216105	0	0
1	1226578	1226579	peak	1.57571	+	73	0.0265636	0.0265636	1226578	0	0
1	1226587	1226588	peak	1.44008	+	63	0.0363012	0.0363012	1226587	0	0
1	1235945	1235946	peak	1.2808	-	52	0.0523837	0.0523837	1235945	0	0
1	1235954	1235955	peak	1.86401	-	96	0.0136769	0.0136769	1235954	0	0
1	1236013	1236014	peak	1.037	-	36	0.0918328	0.0918328	1236013	0	0
1	1236030	1236031	peak	2.05019	-	111	0.00890869	0.00890869	1236030	0	0
1	1236045	1236046	peak	1.45295	-	64	0.0352415	0.0352415	1236045	0	0
1	1236099	1236100	peak	1.21107	-	47	0.0615082	0.0615082	1236099	0	0
1	1237086	1237087	peak	1.46794	+	65	0.0340453	0.0340453	1237086	0	0
1	1237128	1237129	peak	1.13369	+	42	0.0735038	0.0735038	1237128	0	0
1	1237143	1237144	peak	2.28474	+	131	0.00519113	0.00519113	1237143	0	0
1	1237152	1237153	peak	1.29686	+	53	0.0504828	0.0504828	1237152	0	0
1	1240413	1240414	peak	1.28458	+	52	0.0519298	0.0519298	1240413	0	0
1	1240418	1240419	peak	1.29845	+	53	0.0502981	0.0502981	1240418	0	0
1	1240440	1240441	peak	1.06985	+	38	0.0851439	0.0851439	1240440	0	0
1	1242628	1242629	peak	1.24094	+	49	0.0574198	0.0574198	1242628	0	0
1	1242661	1242662	peak	1.48112	+	66	0.0330276	0.0330276	1242661	0	0
1	1242704	1242705	peak	2.49206	+	149	0.00322064	0.00322064	1242704	0	0
1	1243261	1243262	peak	7.73991	+	826	1.82009e-08	1.82009e-08	1243261	0	0
1	1243306	1243307	peak	3.85134	-	454	0.00014082	0.00014082	1243306	0	0
1	1243307	1243308	peak	3.36299	-	374	0.000433516	0.000433516	1243307	0	0
1	1243308	1243309	peak	2.11205	-	164	0.00772594	0.00772594	1243308	0	0
1	1243309	1243310	peak	1.49094	-	82	0.0322891	0.0322891	1243309	0	0
1	1243311	1243312	peak	1.43408	-	68	0.0368057	0.0368057	1243311	0	0
1	1243314	1243315	peak	1.05635	-	38	0.0878314	0.0878314	1243314	0	0
1	1261420	1261421	peak	2.02482	-	109	0.00944461	0.00944461	1261420	0	0
1	1291030	1291031	peak	1.16868	-	45	0.0678134	0.0678134	1291030	0	0
1	1291036	1291037	peak	1.07761	-	39	0.0836356	0.0836356	1291036	0	0
1	1291056	1291057	peak	1.12593	-	42	0.074829	0.074829	1291056	0	0
1	1291065	1291066	peak	1.24655	-	50	0.0566824	0.0566824	1291065	0	0
1	1291074	1291075	peak	3.27167	-	221	0.000534967	0.000534967	1291074	0	0
1	1291077	1291078	peak	2.96265	-	192	0.00108981	0.00108981	1291077	0	0
1	1291084	1291085	peak	2.16764	-	121	0.00679774	0.00679774	1291084	0	0
1	1291091	1291092	peak	1.72999	-	85	0.0186215	0.0186215	1291091	0	0
1	1291093	1291094	peak	2.50449	-	150	0.00312974	0.00312974	1291093	0	0
1	1291096	1291097	peak	1.81987	-	92	0.0151402	0.0151402	1291096	0	0
1	1291299	1291300	peak	2.08815	+	114	0.00816294	0.00816294	1291299	0	0
1	1292106	1292107	peak	1.96703	+	104	0.0107886	0.0107886	1292106	0	0
1	1292108	1292109	peak	1.52166	+	69	0.0300844	0.0300844	1292108	0	0
1	1292110	1292111	peak	3.56638	+	248	0.000271408	0.000271408	1292110	0	0
1	1294262	1294263	peak	1.10617	-	67	0.0783116	0.0783116	1294262	0	0
1	1301860	1301861	peak	1.65396	+	79	0.022184	0.022184	1301860	0	0
1	1301863	1301864	peak	3.07786	+	202	0.000835877	0.000835877	1301863	0	0
1	1301864	1301865	peak	1.19531	+	46	0.0637806	0.0637806	1301864	0	0
1	1307866	1307867	peak	1.09795	-	40	0.0798095	0.0798095	1307866	0	0
1	1307872	1307873	peak	2.21931	-	126	0.00603518	0.00603518	1307872	0	0
1	1307875	1307876	peak	1.77733	-	89	0.0166981	0.0166981	1307875	0	0
1	1307879	1307880	peak	1.87787	-	97	0.0132473	0.0132473	1307879	0	0
1	1307881	1307882	peak	3.84654	-	275	0.000142385	0.000142385	1307881	0	0
1	1313563	1313564	peak	2.64007	+	162	0.00229052	0.00229052	1313563	0	0
1	1313566	1313567	peak	1.328	+	55	0.0469894	0.0469894	1313566	0	0
1	1313573	1313574	peak	1.60098	+	75	0.025062	0.025062	1313573	0	0
1	1313577	1313578	peak	1.3125	+	54	0.048697	0.048697	1313577	0	0
1	1313580	1313581	peak	1.13314	+	42	0.0735963	0.0735963	1313580	0	0
1	1313582	1313583	peak	3.55832	+	248	0.000276488	0.000276488	1313582	0	0
1	1313585	1313586	peak	1.8894	+	98	0.0129002	0.0129002	1313585	0	0
1	1321908	1321909	peak	1.50889	+	68	0.0309821	0.0309821	1321908	0	0
1	1333488	1333489	peak	1.97374	-	108	0.0106233	0.0106233	1333488	0	0
1	1333490	1333491	peak	1.05303	-	38	0.0885047	0.0885047	1333490	0	0
1	1333501	1333502	peak	1.77746	-	91	0.0166934	0.0166934	1333501	0	0
1	1333503	1333504	peak	1.87644	-	99	0.013291	0.013291	1333503	0	0
1	1333509	1333510	peak	5.50313	-	449	3.13957e-06	3.13957e-06	1333509	0	0
1	1333511	1333512	peak	1.71329	-	85	0.0193515	0.0193515	1333511	0	0
1	1333514	1333515	peak	2.77727	-	177	0.00167004	0.00167004	1333514	0	0
1	1333517	1333518	peak	1.06697	-	38	0.08571	0.08571	1333517	0	0
1	1333519	1333520	peak	3.45487	-	239	0.000350857	0.000350857	1333519	0	0
1	1333527	1333528	peak	2.56959	-	156	0.00269405	0.00269405	1333527	0	0
1	1333532	1333533	peak	8.19229	-	717	6.42259e-09	6.42259e-09	1333532	0	0
1	1333535	1333536	peak	1.34228	-	56	0.045469	0.045469	1333535	0	0
1	1333539	1333540	peak	1.44029	-	63	0.0362832	0.0362832	1333539	0	0
1	1334687	1334688	peak	1.45349	+	64	0.0351972	0.0351972	1334687	0	0
1	1345039	1345040	peak	2.32287	+	134	0.00475481	0.00475481	1345039	0	0
1	1349302	1349303	peak	2.01464	-	108	0.00966852	0.00966852	1349302	0	0
1	1349304	1349305	peak	3.48401	-	240	0.000328088	0.000328088	1349304	0	0
1	1350189	1350190	peak	1.44019	+	63	0.0362922	0.0362922	1350189	0	0
1	1358285	1358286	peak	1.09388	-	41	0.0805598	0.0805598	1358285	0	0
1	1358337	1358338	peak	2.11853	-	120	0.00761155	0.00761155	1358337	0	0
1	1358353	1358354	peak	1.94097	-	104	0.0114559	0.0114559	1358353	0	0
1	1358368	1358369	peak	1.84549	-	95	0.0142728	0.0142728	1358368	0	0
1	1358373	1358374	peak	1.39291	-	60	0.0404663	0.0404663	1358373	0	0
1	1358374	1358375	peak	10.1966	-	934	6.35876e-11	6.35876e-11	1358374	0	0
1	1361960	1361961	peak	1.02181	-	35	0.0951019	0.0951019	1361960	0	0
1	1361978	1361979	peak	1.13463	-	42	0.0733455	0.0733455	1361978	0	0
1	1368732	1368733	peak	1.49181	-	68	0.0322246	0.0322246	1368732	0	0
1	1368738	1368739	peak	1.50622	-	69	0.0311733	0.0311733	1368738	0	0
1	1368740	1368741	peak	3.28353	-	225	0.000520563	0.000520563	1368740	0	0
1	1368742	1368743	peak	1.97217	-	106	0.0106617	0.0106617	1368742	0	0
1	1368744	1368745	peak	1.18598	-	46	0.0651659	0.0651659	1368744	0	0
1	1368746	1368747	peak	2.18512	-	124	0.00652955	0.00652955	1368746	0	0
1	1368773	1368774	peak	1.26752	-	51	0.0540102	0.0540102	1368773	0	0
1	1368776	1368777	peak	1.31117	-	54	0.0488464	0.0488464	1368776	0	0
1	1368777	1368778	peak	1.11706	-	41	0.0763733	0.0763733	1368777	0	0
1	1368786	1368787	peak	2.69356	-	167	0.00202509	0.00202509	1368786	0	0
1	1368788	1368789	peak	2.57261	-	156	0.00267543	0.00267543	1368788	0	0
1	1375712	1375713	peak	1.17898	-	45	0.0662247	0.0662247	1375712	0	0
1	1375715	1375716	peak	2.80222	-	177	0.0015768	0.0015768	1375715	0	0
1	1375719	1375720	peak	2.05001	-	111	0.00891223	0.00891223	1375719	0	0
1	1375739	1375740	peak	1.50889	-	68	0.0309821	0.0309821	1375739	0	0
1	1383853	1383854	peak	1.76887	+	88	0.0170268	0.0170268	1383853	0	0
1	1399045	1399046	peak	1.05502	-	37	0.0881016	0.0881016	1399045	0	0
1	1399206	1399207	peak	1.31335	+	54	0.0486011	0.0486011	1399206	0	0
1	1399209	1399210	peak	2.53724	+	153	0.00290244	0.00290244	1399209	0	0
1	1399227	1399228	peak	1.58611	+	74	0.0259355	0.0259355	1399227	0	0
1	1399234	1399235	peak	3.58861	+	251	0.000257862	0.000257862	1399234	0	0
1	1399238	1399239	peak	1.99789	+	107	0.0100486	0.0100486	1399238	0	0
1	1399246	1399247	peak	1.18988	+	46	0.0645829	0.0645829	1399246	0	0
1	1400940	1400941	peak	1.08698	+	39	0.0818506	0.0818506	1400940	0	0
1	1407496	1407497	peak	1.57583	-	73	0.0265562	0.0265562	1407496	0	0
1	1410720	1410721	peak	1.37023	-	58	0.0426357	0.0426357	1410720	0	0
1	1410738	1410739	peak	1.41241	-	61	0.0386888	0.0386888	1410738	0	0
1	1410777	1410778	peak	1.93091	-	101	0.0117243	0.0117243	1410777	0	0
1	1411166	1411167	peak	1.02222	+	35	0.0950129	0.0950129	1411166	0	0
1	1411178	1411179	peak	4.93767	+	382	1.15434e-05	1.15434e-05	1411178	0	0
1	1418358	1418359	peak	1.58255	-	74	0.0261486	0.0261486	1418358	0	0
1	1418427	1418428	peak	1.03707	-	36	0.0918182	0.0918182	1418427	0	0
1	1418440	1418441	peak	7.8342	-	679	1.46488e-08	1.46488e-08	1418440	0	0
1	1418452	1418453	peak	1.1959	-	46	0.0636945	0.0636945	1418452	0	0
1	1421602	1421603	peak	1.08676	-	39	0.0818923	0.0818923	1421602	0	0
1	1421641	1421642	peak	1.52189	-	69	0.0300683	0.0300683	1421641	0	0
1	1432758	1432759	peak	2.00441	-	107	0.0098989	0.0098989	1432758	0	0
1	1441439	1441440	peak	1.02222	-	35	0.0950129	0.0950129	1441439	0	0
1	1450855	1450856	peak	2.19452	-	123	0.00638975	0.00638975	1450855	0	0
1	1450861	1450862	peak	1.21115	-	47	0.0614961	0.0614961	1450861	0	0
1	1452868	1452869	peak	2.27512	-	130	0.00530736	0.00530736	1452868	0	0
1	1452871	1452872	peak	2.51625	-	151	0.00304614	0.00304614	1452871	0	0
1	1452876	1452877	peak	1.7812	-	89	0.0165502	0.0165502	1452876	0	0
1	1455315	1455316	peak	1.29882	-	53	0.0502546	0.0502546	1455315	0	0
1	1458620	1458621	peak	2.07776	-	114	0.00836066	0.00836066	1458620	0	0
1	1458663	1458664	peak	3.00451	-	196	0.000989679	0.000989679	1458663	0	0
1	1458696	1458697	peak	3.22596	-	216	0.000594353	0.000594353	1458696	0	0
1	1458697	1458698	peak	1.08668	-	39	0.0819061	0.0819061	1458697	0	0
1	1469603	1469604	peak	1.14992	+	43	0.0708076	0.0708076	1469603	0	0
1	1476094	1476095	peak	2.00307	-	107	0.00992948	0.00992948	1476094	0	0
1	1478878	1478879	peak	1.15044	-	72	0.070723	0.070723	1478878	0	0
1	1482563	1482564	peak	1.56245	+	72	0.0273875	0.0273875	1482563	0	0
1	1482591	1482592	peak	1.83132	+	93	0.0147462	0.0147462	1482591	0	0
1	1482605	1482606	peak	1.50763	+	68	0.0310722	0.0310722	1482605	0	0
1	1490908	1490909	peak	2.14718	-	119	0.00712552	0.00712552	1490908	0	0
1	1490931	1490932	peak	1.15008	-	43	0.0707817	0.0707817	1490931	0	0
1	1494239	1494240	peak	1.56245	-	72	0.0273875	0.0273875	1494239	0	0
1	1501817	1501818	peak	1.75622	-	87	0.0175301	0.0175301	1501817	0	0
1	1503762	1503763	peak	1.31239	-	56	0.0487094	0.0487094	1503762	0	0
1	1503769	1503770	peak	3.68852	-	266	0.000204873	0.000204873	1503769	0	0
1	1503774	1503775	peak	2.4998	-	153	0.00316374	0.00316374	1503774	0	0
1	1503776	1503777	peak	7.65431	-	675	2.21662e-08	2.21662e-08	1503776	0	0
1	1503779	1503780	peak	13.3272	-	1278	4.70735e-14	4.70735e-14	1503779	0	0
1	1503780	1503781	peak	1.38808	-	60	0.0409188	0.0409188	1503780	0	0
1	1503785	1503786	peak	6.16483	-	513	6.84175e-07	6.84175e-07	1503785	0	0
1	1503791	1503792	peak	2.07093	-	114	0.00849322	0.00849322	1503791	0	0
1	1503812	1503813	peak	1.5682	-	73	0.0270274	0.0270274	1503812	0	0
1	1503814	1503815	peak	2.4719	-	148	0.00337363	0.00337363	1503814	0	0
1	1503823	1503824	peak	9.90825	-	900	1.23524e-10	1.23524e-10	1503823	0	0
1	1503827	1503828	peak	4.44904	-	334	3.55597e-05	3.55597e-05	1503827	0	0
1	1510257	1510258	peak	1.8522	-	96	0.0140541	0.0140541	1510257	0	0
1	1510263	1510264	peak	1.39033	-	60	0.0407067	0.0407067	1510263	0	0
1	1510266	1510267	peak	1.65764	-	80	0.021997	0.021997	1510266	0	0
1	1510274	1510275	peak	1.38021	-	59	0.041667	0.041667	1510274	0	0
1	1510278	1510279	peak	1.13143	-	42	0.0738871	0.0738871	1510278	0	0
1	1510280	1510281	peak	12.1708	-	1142	6.74905e-13	6.74905e-13	1510280	0	0
1	1510418	1510419	peak	1.42649	+	62	0.0374549	0.0374549	1510418	0	0
1	1510425	1510426	peak	1.3416	+	56	0.0455409	0.0455409	1510425	0	0
1	1534382	1534383	peak	1.19556	-	46	0.0637437	0.0637437	1534382	0	0
1	1534386	1534387	peak	1.05473	-	37	0.088159	0.088159	1534386	0	0
1	1534389	1534390	peak	4.1893	-	308	6.46698e-05	6.46698e-05	1534389	0	0
1	1559755	1559756	peak	3.36905	-	229	0.000427516	0.000427516	1559755	0	0
1	1564079	1564080	peak	1.02168	-	35	0.0951316	0.0951316	1564079	0	0
1	1564146	1564147	peak	1.81943	-	92	0.0151556	0.0151556	1564146	0	0
1	1564603	1564604	peak	1.61498	+	76	0.0242673	0.0242673	1564603	0	0
1	1576859	1576860	peak	1.03846	+	36	0.0915261	0.0915261	1576859	0	0
1	1583657	1583658	peak	3.46974	-	239	0.000339048	0.000339048	1583657	0	0
1	1583661	1583662	peak	2.53815	-	153	0.00289636	0.00289636	1583661	0	0
1	1583667	1583668	peak	1.0869	-	39	0.0818645	0.0818645	1583667	0	0
1	1583670	1583671	peak	1.13447	-	42	0.0733719	0.0733719	1583670	0	0
1	1587729	1587730	peak	2.02685	-	109	0.00940038	0.00940038	1587729	0	0
1	1587766	1587767	peak	1.10319	-	40	0.0788517	0.0788517	1587766	0	0
1	1595780	1595781	peak	1.0858	-	39	0.0820729	0.0820729	1595780	0	0
1	1595782	1595783	peak	2.22698	-	126	0.00592947	0.00592947	1595782	0	0
1	1595853	1595854	peak	1.48179	-	66	0.0329766	0.0329766	1595853	0	0
1	1599922	1599923	peak	1.22614	+	48	0.0594103	0.0594103	1599922	0	0
1	1625012	1625013	peak	1.45393	+	64	0.0351618	0.0351618	1625012	0	0
1	1625017	1625018	peak	1.18013	+	45	0.0660492	0.0660492	1625017	0	0
1	1643876	1643877	peak	1.14556	-	43	0.0715223	0.0715223	1643876	0	0
1	1643882	1643883	peak	2.34941	-	137	0.00447293	0.00447293	1643882	0	0
1	1643886	1643887	peak	1.08455	-	39	0.0823093	0.0823093	1643886	0	0
1	1643888	1643889	peak	6.38767	-	531	4.09571e-07	4.09571e-07	1643888	0	0
1	1647124	1647125	peak	1.31031	-	54	0.0489426	0.0489426	1647124	0	0
1	1647146	1647147	peak	2.22564	-	126	0.00594787	0.00594787	1647146	0	0
1	1647148	1647149	peak	2.19037	-	123	0.00645103	0.00645103	1647148	0	0
1	1647160	1647161	peak	1.02107	-	35	0.0952652	0.0952652	1647160	0	0
1	1664434	1664435	peak	1.07115	-	38	0.0848897	0.0848897	1664434	0	0
1	1668855	1668856	peak	1.23663	-	49	0.0579924	0.0579924	1668855	0	0
1	1668858	1668859	peak	1.71193	-	84	0.0194122	0.0194122	1668858	0	0
1	1668899	1668900	peak	2.32205	-	134	0.00476371	0.00476371	1668899	0	0
1	1668902	1668903	peak	1.31393	-	54	0.0485372	0.0485372	1668902	0	0
1	1671925	1671926	peak	1.27052	+	51	0.0536385	0.0536385	1671925	0	0
1	1704688	1704689	peak	1.22758	-	81	0.0592136	0.0592136	1704688	0	0
1	1704690	1704691	peak	1.92551	-	175	0.011871	0.011871	1704690	0	0
1	1715360	1715361	peak	1.36922	+	58	0.0427348	0.0427348	1715360	0	0
1	1718841	1718842	peak	2.61316	-	162	0.00243691	0.00243691	1718841	0	0
1	1718849	1718850	peak	2.37366	-	140	0.00423002	0.00423002	1718849	0	0
1	1718852	1718853	peak	3.44847	-	239	0.000356062	0.000356062	1718852	0	0
1	1718857	1718858	peak	3.98358	-	290	0.000103853	0.000103853	1718857	0	0
1	1718863	1718864	peak	1.57001	-	73	0.0269147	0.0269147	1718863	0	0
1	1718870	1718871	peak	1.01965	-	35	0.0955771	0.0955771	1718870	0	0
1	1718874	1718875	peak	2.4314	-	144	0.00370341	0.00370341	1718874	0	0
1	1718877	1718878	peak	1.41042	-	61	0.0388668	0.0388668	1718877	0	0
1	1718879	1718880	peak	1.43889	-	63	0.0364004	0.0364004	1718879	0	0
1	1718880	1718881	peak	4.14286	-	304	7.1968e-05	7.1968e-05	1718880	0	0
1	1718903	1718904	peak	1.31402	-	54	0.0485266	0.0485266	1718903	0	0
1	1718908	1718909	peak	1.54937	-	71	0.0282246	0.0282246	1718908	0	0
1	1726628	1726629	peak	1.66665	+	80	0.0215451	0.0215451	1726628	0	0
1	1730248	1730249	peak	2.70688	+	168	0.00196392	0.00196392	1730248	0	0
1	1730250	1730251	peak	1.89328	+	98	0.0127855	0.0127855	1730250	0	0
1	1730285	1730286	peak	1.08551	+	39	0.0821285	0.0821285	1730285	0	0
1	1732876	1732877	peak	1.0548	+	37	0.0881446	0.0881446	1732876	0	0
1	1744772	1744773	peak	1.03859	+	36	0.0914969	0.0914969	1744772	0	0
1	1744779	1744780	peak	3.20858	+	214	0.000618608	0.000618608	1744779	0	0
1	1744790	1744791	peak	2.12349	+	117	0.00752502	0.00752502	1744790	0	0
1	1748350	1748351	peak	1.10326	+	40	0.078838	0.078838	1748350	0	0
1	1762221	1762222	peak	1.58795	+	74	0.0258257	0.0258257	1762221	0	0
1	1762223	1762224	peak	inf	+	2107	0	0	1762223	0	0
1	1762225	1762226	peak	12.4038	+	1173	3.94684e-13	3.94684e-13	1762225	0	0
1	1762229	1762230	peak	1.31829	+	55	0.0480516	0.0480516	1762229	0	0
1	1762230	1762231	peak	2.58144	+	159	0.00262159	0.00262159	1762230	0	0
1	1762239	1762240	peak	1.52004	+	71	0.0301966	0.0301966	1762239	0	0
1	1766274	1766275	peak	1.071	-	38	0.0849179	0.0849179	1766274	0	0
1	1766278	1766279	peak	3.25135	-	218	0.0005606	0.0005606	1766278	0	0
1	1766282	1766283	peak	1.08735	-	39	0.0817812	0.0817812	1766282	0	0
1	1768612	1768613	peak	2.05235	-	117	0.00886451	0.00886451	1768612	0	0
1	1768619	1768620	peak	4.47095	-	356	3.381e-05	3.381e-05	1768619	0	0
1	1768639	1768640	peak	1.55013	-	74	0.0281753	0.0281753	1768639	0	0
1	1768647	1768648	peak	1.96899	-	108	0.0107401	0.0107401	1768647	0	0
1	1768651	1768652	peak	2.55026	-	159	0.0028167	0.0028167	1768651	0	0
1	1768652	1768653	peak	1.19068	-	47	0.0644643	0.0644643	1768652	0	0
1	1768654	1768655	peak	2.53389	-	157	0.00292488	0.00292488	1768654	0	0
1	1768658	1768659	peak	1.7451	-	88	0.0179845	0.0179845	1768658	0	0
1	1768662	1768663	peak	inf	-	5351	0	0	1768662	0	0
1	1768663	1768664	peak	1.67718	-	81	0.0210292	0.0210292	1768663	0	0
1	1768665	1768666	peak	13.4374	-	1270	3.65263e-14	3.65263e-14	1768665	0	0
1	1768666	1768667	peak	1.66691	-	80	0.0215321	0.0215321	1768666	0	0
1	1768992	1768993	peak	2.35726	+	137	0.00439279	0.00439279	1768992	0	0
1	1768998	1768999	peak	1.16484	+	44	0.0684157	0.0684157	1768998	0	0
1	1773296	1773297	peak	1.1642	-	44	0.0685177	0.0685177	1773296	0	0
1	1773302	1773303	peak	1.5082	-	68	0.0310312	0.0310312	1773302	0	0
1	1773304	1773305	peak	1.81943	-	92	0.0151556	0.0151556	1773304	0	0
1	1779339	1779340	peak	1.13463	+	42	0.0733455	0.0733455	1779339	0	0
1	1779370	1779371	peak	1.34268	+	56	0.045428	0.045428	1779370	0	0
1	1779396	1779397	peak	1.10281	+	40	0.0789199	0.0789199	1779396	0	0
1	1779398	1779399	peak	1.5745	+	73	0.0266381	0.0266381	1779398	0	0
1	1781829	1781830	peak	1.36972	+	83	0.0426858	0.0426858	1781829	0	0
1	1781865	1781866	peak	1.14268	-	50	0.0719981	0.0719981	1781865	0	0
1	1803962	1803963	peak	1.43965	-	63	0.0363372	0.0363372	1803962	0	0
1	1803969	1803970	peak	1.11844	-	41	0.0761315	0.0761315	1803969	0	0
1	1815461	1815462	peak	1.43943	-	63	0.0363553	0.0363553	1815461	0	0
1	1817285	1817286	peak	1.25457	-	50	0.0556459	0.0556459	1817285	0	0
1	1817288	1817289	peak	3.20521	-	214	0.000623437	0.000623437	1817288	0	0
1	1817294	1817295	peak	2.29812	-	132	0.00503365	0.00503365	1817294	0	0
1	1817297	1817298	peak	1.97869	-	105	0.0105029	0.0105029	1817297	0	0
1	1820521	1820522	peak	1.64988	+	85	0.0223933	0.0223933	1820521	0	0
1	1821888	1821889	peak	1.03576	-	36	0.092096	0.092096	1821888	0	0
1	1822599	1822600	peak	4.49372	+	338	3.20832e-05	3.20832e-05	1822599	0	0
1	1822601	1822602	peak	1.80661	+	91	0.0156094	0.0156094	1822601	0	0
1	1822603	1822604	peak	3.56428	+	248	0.000272725	0.000272725	1822603	0	0
1	1822617	1822618	peak	1.32491	+	55	0.0473246	0.0473246	1822617	0	0
1	1829759	1829760	peak	1.51216	-	72	0.0307498	0.0307498	1829759	0	0
1	1829768	1829769	peak	1.24893	-	52	0.0563731	0.0563731	1829768	0	0
1	1829770	1829771	peak	2.29851	-	139	0.00502908	0.00502908	1829770	0	0
1	1829789	1829790	peak	5.14927	-	421	7.09132e-06	7.09132e-06	1829789	0	0
1	1829798	1829799	peak	6.22355	-	531	5.97649e-07	5.97649e-07	1829798	0	0
1	1829806	1829807	peak	5.73037	-	477	1.86048e-06	1.86048e-06	1829806	0	0
1	1829821	1829822	peak	1.08661	-	40	0.0819192	0.0819192	1829821	0	0
1	1829828	1829829	peak	1.80033	-	93	0.015837	0.015837	1829828	0	0
1	1829835	1829836	peak	1.6776	-	83	0.0210089	0.0210089	1829835	0	0
1	1829843	1829844	peak	1.44823	-	65	0.0356266	0.0356266	1829843	0	0
1	1829848	1829849	peak	6.94819	-	599	1.1267e-07	1.1267e-07	1829848	0	0
1	1829852	1829853	peak	2.38705	-	142	0.0041016	0.0041016	1829852	0	0
1	1829856	1829857	peak	1.10976	-	41	0.0776683	0.0776683	1829856	0	0
1	1829860	1829861	peak	2.35093	-	138	0.0044573	0.0044573	1829860	0	0
1	1829862	1829863	peak	1.52664	-	70	0.0297412	0.0297412	1829862	0	0
1	1829866	1829867	peak	1.11287	-	41	0.0771142	0.0771142	1829866	0	0
1	1829880	1829881	peak	4.93625	-	385	1.15812e-05	1.15812e-05	1829880	0	0
1	1829902	1829903	peak	2.03477	-	110	0.00923058	0.00923058	1829902	0	0
1	1829905	1829906	peak	2.75566	-	173	0.00175526	0.00175526	1829905	0	0
1	1829910	1829911	peak	1.20877	-	47	0.0618348	0.0618348	1829910	0	0
1	1829919	1829920	peak	1.29761	-	53	0.0503958	0.0503958	1829919	0	0
1	1829924	1829925	peak	6.08962	-	499	8.13538e-07	8.13538e-07	1829924	0	0
1	1832940	1832941	peak	1.65461	+	79	0.0221508	0.0221508	1832940	0	0
1	1832942	1832943	peak	2.49518	+	149	0.0031976	0.0031976	1832942	0	0
1	1832945	1832946	peak	1.05495	+	37	0.0881159	0.0881159	1832945	0	0
1	1832982	1832983	peak	2.3985	+	141	0.00399482	0.00399482	1832982	0	0
1	1854966	1854967	peak	1.33993	-	56	0.0457157	0.0457157	1854966	0	0
1	1854988	1854989	peak	1.20936	-	47	0.06175	0.06175	1854988	0	0
1	1854997	1854998	peak	1.03735	-	36	0.0917597	0.0917597	1854997	0	0
1	1855000	1855001	peak	1.25421	-	50	0.0556918	0.0556918	1855000	0	0
1	1855003	1855004	peak	1.23953	-	49	0.0576065	0.0576065	1855003	0	0
1	1855008	1855009	peak	1.69109	-	82	0.0203661	0.0203661	1855008	0	0
1	1855021	1855022	peak	1.48168	-	66	0.0329851	0.0329851	1855021	0	0
1	1855051	1855052	peak	1.37113	-	58	0.0425467	0.0425467	1855051	0	0
1	1860701	1860702	peak	1.21004	-	47	0.0616532	0.0616532	1860701	0	0
1	1860709	1860710	peak	1.3847	-	59	0.0412387	0.0412387	1860709	0	0
1	1860711	1860712	peak	3.42068	-	234	0.000379595	0.000379595	1860711	0	0
1	1860716	1860717	peak	2.596	-	158	0.00253513	0.00253513	1860716	0	0
1	1894126	1894127	peak	1.79089	-	90	0.016185	0.016185	1894126	0	0
1	1894137	1894138	peak	3.56533	-	248	0.000272066	0.000272066	1894137	0	0
1	1894140	1894141	peak	1.32781	-	55	0.0470103	0.0470103	1894140	0	0
1	1894147	1894148	peak	1.05487	-	37	0.0881303	0.0881303	1894147	0	0
1	1894168	1894169	peak	1.13455	-	42	0.0733587	0.0733587	1894168	0	0
1	1894171	1894172	peak	1.02222	-	35	0.0950129	0.0950129	1894171	0	0
1	1896903	1896904	peak	1.12817	-	42	0.0744437	0.0744437	1896903	0	0
1	1896914	1896915	peak	14.2644	-	1344	5.44009e-15	5.44009e-15	1896914	0	0
1	1896917	1896918	peak	3.09295	-	204	0.000807324	0.000807324	1896917	0	0
1	1896926	1896927	peak	1.06977	-	38	0.0851581	0.0851581	1896926	0	0
1	1896929	1896930	peak	1.50683	-	68	0.0311297	0.0311297	1896929	0	0
1	1896934	1896935	peak	4.6515	-	354	2.231e-05	2.231e-05	1896934	0	0
1	1896935	1896936	peak	4.37377	-	326	4.22893e-05	4.22893e-05	1896935	0	0
1	1897202	1897203	peak	1.32771	+	55	0.0470207	0.0470207	1897202	0	0
1	1897206	1897207	peak	1.42606	+	62	0.0374917	0.0374917	1897206	0	0
1	1897208	1897209	peak	2.11018	+	116	0.00775922	0.00775922	1897208	0	0
1	1897213	1897214	peak	1.42532	+	62	0.037556	0.037556	1897213	0	0
1	1899963	1899964	peak	1.24103	+	49	0.0574082	0.0574082	1899963	0	0
1	1911111	1911112	peak	1.05509	+	37	0.0880872	0.0880872	1911111	0	0
1	1916422	1916423	peak	7.7086	+	666	1.95614e-08	1.95614e-08	1916422	0	0
1	1916424	1916425	peak	3.16148	+	210	0.00068947	0.00068947	1916424	0	0
1	1916426	1916427	peak	1.66429	+	80	0.0216624	0.0216624	1916426	0	0
1	1916427	1916428	peak	3.02865	+	198	0.000936165	0.000936165	1916427	0	0
1	1916428	1916429	peak	1.95065	+	103	0.0112033	0.0112033	1916428	0	0
1	1916429	1916430	peak	13.7319	+	1304	1.85407e-14	1.85407e-14	1916429	0	0
1	1916440	1916441	peak	1.25002	+	50	0.0562321	0.0562321	1916440	0	0
1	1921178	1921179	peak	1.2698	-	51	0.0537285	0.0537285	1921178	0	0
1	1921180	1921181	peak	2.33339	-	135	0.00464094	0.00464094	1921180	0	0
1	1921181	1921182	peak	1.49503	-	67	0.0319868	0.0319868	1921181	0	0
1	1921185	1921186	peak	1.71874	-	84	0.0191101	0.0191101	1921185	0	0
1	1922351	1922352	peak	3.59994	+	251	0.000251222	0.000251222	1922351	0	0
1	1936814	1936815	peak	1.78988	-	90	0.0162227	0.0162227	1936814	0	0
1	1936816	1936817	peak	6.601	-	553	2.50612e-07	2.50612e-07	1936816	0	0
1	1936820	1936821	peak	1.58918	-	74	0.0257527	0.0257527	1936820	0	0
1	1944932	1944933	peak	1.41315	-	61	0.0386234	0.0386234	1944932	0	0
1	1946809	1946810	peak	2.53952	+	153	0.00288725	0.00288725	1946809	0	0
1	1946816	1946817	peak	5.8794	+	478	1.32009e-06	1.32009e-06	1946816	0	0
1	1946820	1946821	peak	2.5345	+	153	0.00292076	0.00292076	1946820	0	0
1	1946823	1946824	peak	1.16218	+	44	0.0688369	0.0688369	1946823	0	0
1	1952690	1952691	peak	1.85446	-	96	0.013981	0.013981	1952690	0	0
1	1952695	1952696	peak	1.33399	-	56	0.0463459	0.0463459	1952695	0	0
1	1952711	1952712	peak	1.04917	-	37	0.089296	0.089296	1952711	0	0
1	1952719	1952720	peak	4.69088	-	361	2.03761e-05	2.03761e-05	1952719	0	0
1	1952726	1952727	peak	1.35114	-	57	0.0445514	0.0445514	1952726	0	0
1	1952729	1952730	peak	1.81134	-	92	0.0154403	0.0154403	1952729	0	0
1	1952734	1952735	peak	1.1469	-	43	0.071301	0.071301	1952734	0	0
1	1952738	1952739	peak	1.96214	-	104	0.0109108	0.0109108	1952738	0	0
1	1952741	1952742	peak	1.28246	-	52	0.0521842	0.0521842	1952741	0	0
1	1952753	1952754	peak	1.14833	-	43	0.0710671	0.0710671	1952753	0	0
1	1952759	1952760	peak	2.32063	-	134	0.00477932	0.00477932	1952759	0	0
1	1952767	1952768	peak	6.20757	-	511	6.20057e-07	6.20057e-07	1952767	0	0
1	1952770	1952771	peak	2.90425	-	186	0.00124668	0.00124668	1952770	0	0
1	1952782	1952783	peak	2.62913	-	161	0.00234893	0.00234893	1952782	0	0
1	1952785	1952786	peak	2.72956	-	170	0.00186398	0.00186398	1952785	0	0
1	1952812	1952813	peak	1.16557	-	44	0.068301	0.068301	1952812	0	0
1	1954849	1954850	peak	1.62806	+	77	0.0235473	0.0235473	1954849	0	0
1	1954854	1954855	peak	1.13392	+	42	0.0734642	0.0734642	1954854	0	0
1	1958928	1958929	peak	1.24059	+	49	0.0574665	0.0574665	1958928	0	0
1	1958945	1958946	peak	1.06977	+	38	0.0851581	0.0851581	1958945	0	0
1	1963010	1963011	peak	3.14393	-	208	0.000717911	0.000717911	1963010	0	0
1	1965820	1965821	peak	1.13455	+	42	0.0733587	0.0733587	1965820	0	0
1	1965837	1965838	peak	1.05473	+	37	0.088159	0.088159	1965837	0	0
1	1965841	1965842	peak	3.46191	+	238	0.000345216	0.000345216	1965841	0	0
1	1969433	1969434	peak	1.29312	-	53	0.0509188	0.0509188	1969433	0	0
1	1969453	1969454	peak	2.81453	-	179	0.00153274	0.00153274	1969453	0	0
1	1969475	1969476	peak	3.66264	-	258	0.000217452	0.000217452	1969475	0	0
1	1969480	1969481	peak	1.19414	-	46	0.063953	0.063953	1969480	0	0
1	1969481	1969482	peak	1.14865	-	43	0.0710152	0.0710152	1969481	0	0
1	1969485	1969486	peak	6.7679	-	569	1.70646e-07	1.70646e-07	1969485	0	0
1	1969507	1969508	peak	1.45415	-	64	0.0351442	0.0351442	1969507	0	0
1	1969523	1969524	peak	1.10311	-	40	0.0788653	0.0788653	1969523	0	0
1	1969526	1969527	peak	4.31313	-	320	4.86262e-05	4.86262e-05	1969526	0	0
1	1974299	1974300	peak	1.07115	-	38	0.0848897	0.0848897	1974299	0	0
1	1989478	1989479	peak	1.8692	+	96	0.0135146	0.0135146	1989478	0	0
1	1989481	1989482	peak	1.37073	+	58	0.0425863	0.0425863	1989481	0	0
1	1989489	1989490	peak	1.03783	+	36	0.0916575	0.0916575	1989489	0	0
1	1989490	1989491	peak	1.80545	+	91	0.0156514	0.0156514	1989490	0	0
1	1992136	1992137	peak	1.34591	-	57	0.0450907	0.0450907	1992136	0	0
1	1992140	1992141	peak	1.7171	-	85	0.0191824	0.0191824	1992140	0	0
1	1992199	1992200	peak	1.20868	-	47	0.0618469	0.0618469	1992199	0	0
1	1992203	1992204	peak	5.88598	-	479	1.30023e-06	1.30023e-06	1992203	0	0
1	1992205	1992206	peak	5.42664	-	432	3.74422e-06	3.74422e-06	1992205	0	0
1	1992208	1992209	peak	1.35639	-	57	0.0440156	0.0440156	1992208	0	0
1	1992366	1992367	peak	1.19556	+	46	0.0637437	0.0637437	1992366	0	0
1	1992388	1992389	peak	1.67837	+	81	0.0209716	0.0209716	1992388	0	0
1	1996109	1996110	peak	1.35679	-	57	0.0439753	0.0439753	1996109	0	0
1	1996111	1996112	peak	1.08727	-	39	0.0817951	0.0817951	1996111	0	0
1	2001442	2001443	peak	1.18013	+	45	0.0660492	0.0660492	2001442	0	0
1	2001467	2001468	peak	2.27394	+	130	0.00532187	0.00532187	2001467	0	0
1	2001489	2001490	peak	3.6357	+	255	0.000231364	0.000231364	2001489	0	0
1	2001501	2001502	peak	1.02052	+	35	0.095384	0.095384	2001501	0	0
1	2001510	2001511	peak	3.36057	+	229	0.000435944	0.000435944	2001510	0	0
1	2001569	2001570	peak	2.71783	+	170	0.00191499	0.00191499	2001569	0	0
1	2007055	2007056	peak	1.83272	-	94	0.0146988	0.0146988	2007055	0	0
1	2007058	2007059	peak	1.03411	-	36	0.0924473	0.0924473	2007058	0	0
1	2007062	2007063	peak	1.7857	-	90	0.0163794	0.0163794	2007062	0	0
1	2013491	2013492	peak	1.19498	-	46	0.0638299	0.0638299	2013491	0	0
1	2013494	2013495	peak	1.5074	-	68	0.0310886	0.0310886	2013494	0	0
1	2013504	2013505	peak	2.34471	-	136	0.00452153	0.00452153	2013504	0	0
1	2013506	2013507	peak	1.05445	-	37	0.0882164	0.0882164	2013506	0	0
1	2013511	2013512	peak	4.78722	-	367	1.63222e-05	1.63222e-05	2013511	0	0
1	2013514	2013515	peak	3.47415	-	239	0.000335623	0.000335623	2013514	0	0
1	2013521	2013522	peak	2.13626	-	118	0.00730704	0.00730704	2013521	0	0
1	2013534	2013535	peak	1.25591	-	50	0.0554741	0.0554741	2013534	0	0
1	2025598	2025599	peak	2.62961	+	161	0.00234635	0.00234635	2025598	0	0
1	2025600	2025601	peak	2.36876	+	138	0.004278	0.004278	2025600	0	0
1	2027732	2027733	peak	2.40359	+	141	0.00394827	0.00394827	2027732	0	0
1	2027742	2027743	peak	1.2109	+	47	0.0615323	0.0615323	2027742	0	0
1	2027748	2027749	peak	1.25528	+	50	0.0555542	0.0555542	2027748	0	0
1	2027759	2027760	peak	1.08646	+	39	0.0819478	0.0819478	2027759	0	0
1	2029951	2029952	peak	1.42713	+	62	0.0373999	0.0373999	2029951	0	0
1	2029975	2029976	peak	1.19548	+	46	0.063756	0.063756	2029975	0	0
1	2029990	2029991	peak	1.79334	+	90	0.0160938	0.0160938	2029990	0	0
1	2030009	2030010	peak	1.0536	+	37	0.0883888	0.0883888	2030009	0	0
1	2032344	2032345	peak	8.86778	+	789	1.35587e-09	1.35587e-09	2032344	0	0
1	2032346	2032347	peak	1.6502	+	79	0.0223768	0.0223768	2032346	0	0
1	2032349	2032350	peak	3.97031	+	288	0.000107076	0.000107076	2032349	0	0
1	2034155	2034156	peak	1.08735	+	39	0.0817812	0.0817812	2034155	0	0
1	2035813	2035814	peak	1.28458	+	52	0.0519298	0.0519298	2035813	0	0
1	2035840	2035841	peak	1.34228	+	56	0.045469	0.045469	2035840	0	0
1	2035869	2035870	peak	1.14928	+	43	0.0709114	0.0709114	2035869	0	0
1	2047802	2047803	peak	1.96802	+	104	0.0107642	0.0107642	2047802	0	0
1	2047826	2047827	peak	1.2257	+	48	0.0594696	0.0594696	2047826	0	0
1	2047838	2047839	peak	1.07093	+	38	0.084932	0.084932	2047838	0	0
1	2047874	2047875	peak	2.48095	+	148	0.00330406	0.00330406	2047874	0	0
1	2047876	2047877	peak	inf	+	5338	0	0	2047876	0	0
1	2047878	2047879	peak	1.20503	+	47	0.0623688	0.0623688	2047878	0	0
1	2047880	2047881	peak	1.24762	+	50	0.0565436	0.0565436	2047880	0	0
1	2047881	2047882	peak	1.66783	+	81	0.0214869	0.0214869	2047881	0	0
1	2047882	2047883	peak	inf	+	5271	0	0	2047882	0	0
1	2047884	2047885	peak	inf	+	5134	0	0	2047884	0	0
1	2047889	2047890	peak	inf	+	1925	0	0	2047889	0	0
1	2047893	2047894	peak	2.55851	+	165	0.00276369	0.00276369	2047893	0	0
1	2047895	2047896	peak	1.39367	+	64	0.0403951	0.0403951	2047895	0	0
1	2047897	2047898	peak	3.8179	+	298	0.000152089	0.000152089	2047897	0	0
1	2047899	2047900	peak	14.0303	+	1491	9.32587e-15	9.32587e-15	2047899	0	0
1	2047900	2047901	peak	1.28776	+	58	0.0515512	0.0515512	2047900	0	0
1	2047908	2047909	peak	1.40214	+	69	0.0396148	0.0396148	2047908	0	0
1	2047909	2047910	peak	1.74932	+	100	0.0178105	0.0178105	2047909	0	0
1	2047911	2047912	peak	7.75575	+	789	1.7549e-08	1.7549e-08	2047911	0	0
1	2047913	2047914	peak	1.59833	+	87	0.0252159	0.0252159	2047913	0	0
1	2047915	2047916	peak	1.74157	+	100	0.0181314	0.0181314	2047915	0	0
1	2047916	2047917	peak	7.55929	+	767	2.75875e-08	2.75875e-08	2047916	0	0
1	2047917	2047918	peak	2.33918	+	161	0.00457956	0.00457956	2047917	0	0
1	2047919	2047920	peak	3.70025	+	314	0.000199411	0.000199411	2047919	0	0
1	2047924	2047925	peak	1.32146	+	65	0.0477024	0.0477024	2047924	0	0
1	2047932	2047933	peak	1.21117	+	56	0.0614935	0.0614935	2047932	0	0
1	2052065	2052066	peak	1.35461	-	57	0.0441972	0.0441972	2052065	0	0
1	2052113	2052114	peak	1.22518	-	48	0.0595409	0.0595409	2052113	0	0
1	2055244	2055245	peak	1.0187	-	35	0.0957853	0.0957853	2055244	0	0
1	2055250	2055251	peak	1.35242	-	57	0.0444197	0.0444197	2055250	0	0
1	2055273	2055274	peak	5.61288	-	451	2.43848e-06	2.43848e-06	2055273	0	0
1	2055312	2055313	peak	1.44019	-	63	0.0362922	0.0362922	2055312	0	0
1	2077684	2077685	peak	1.70246	-	85	0.01984	0.01984	2077684	0	0
1	2077687	2077688	peak	1.60665	-	77	0.0247369	0.0247369	2077687	0	0
1	2077690	2077691	peak	1.35851	-	58	0.043802	0.043802	2077690	0	0
1	2077691	2077692	peak	3.09972	-	207	0.000794835	0.000794835	2077691	0	0
1	2077693	2077694	peak	inf	-	3550	0	0	2077693	0	0
1	2077694	2077695	peak	1.53542	-	70	0.0291462	0.0291462	2077694	0	0
1	2081875	2081876	peak	1.11821	-	41	0.0761718	0.0761718	2081875	0	0
1	2081933	2081934	peak	1.13455	-	42	0.0733587	0.0733587	2081933	0	0
1	2083423	2083424	peak	1.34258	+	56	0.0454382	0.0454382	2083423	0	0
1	2096239	2096240	peak	1.18038	-	45	0.0660117	0.0660117	2096239	0	0
1	2114356	2114357	peak	1.90575	-	99	0.0124238	0.0124238	2114356	0	0
1	2114363	2114364	peak	1.95535	-	103	0.0110829	0.0110829	2114363	0	0
1	2114519	2114520	peak	1.77819	-	89	0.0166652	0.0166652	2114519	0	0
1	2114538	2114539	peak	4.06298	-	296	8.65009e-05	8.65009e-05	2114538	0	0
1	2114540	2114541	peak	1.19531	-	46	0.0637806	0.0637806	2114540	0	0
1	2120744	2120745	peak	1.76915	-	88	0.0170157	0.0170157	2120744	0	0
1	2135639	2135640	peak	1.32491	-	55	0.0473246	0.0473246	2135639	0	0
1	2135664	2135665	peak	1.28412	-	52	0.051985	0.051985	2135664	0	0
1	2135853	2135854	peak	1.10281	+	40	0.0789199	0.0789199	2135853	0	0
1	2135860	2135861	peak	1.10199	+	40	0.0790702	0.0790702	2135860	0	0
1	2135886	2135887	peak	1.96312	+	104	0.0108863	0.0108863	2135886	0	0
1	2135888	2135889	peak	1.26707	+	51	0.0540666	0.0540666	2135888	0	0
1	2135892	2135893	peak	1.32366	+	55	0.0474611	0.0474611	2135892	0	0
1	2135899	2135900	peak	1.43438	+	63	0.0367805	0.0367805	2135899	0	0
1	2135902	2135903	peak	1.48802	+	67	0.0325069	0.0325069	2135902	0	0
1	2148345	2148346	peak	1.385	+	59	0.0412095	0.0412095	2148345	0	0
1	2155937	2155938	peak	2.01787	-	109	0.00959681	0.00959681	2155937	0	0
1	2155946	2155947	peak	1.84699	-	95	0.0142235	0.0142235	2155946	0	0
1	2155998	2155999	peak	2.81165	-	178	0.00154295	0.00154295	2155998	0	0
1	2156002	2156003	peak	3.48129	-	240	0.000330152	0.000330152	2156002	0	0
1	2156007	2156008	peak	2.99216	-	194	0.00101821	0.00101821	2156007	0	0
1	2160695	2160696	peak	1.06992	-	38	0.0851298	0.0851298	2160695	0	0
1	2163084	2163085	peak	7.01868	-	596	9.57899e-08	9.57899e-08	2163084	0	0
1	2163087	2163088	peak	8.9616	-	799	1.09245e-09	1.09245e-09	2163087	0	0
1	2163088	2163089	peak	1.19397	-	46	0.0639777	0.0639777	2163088	0	0
1	2163111	2163112	peak	1.3125	-	54	0.048697	0.048697	2163111	0	0
1	2163116	2163117	peak	3.82621	-	273	0.000149208	0.000149208	2163116	0	0
1	2163118	2163119	peak	6.92661	-	585	1.18411e-07	1.18411e-07	2163118	0	0
1	2163148	2163149	peak	2.159	-	120	0.00693427	0.00693427	2163148	0	0
1	2168563	2168564	peak	2.26527	+	129	0.00542916	0.00542916	2168563	0	0
1	2168571	2168572	peak	1.13416	+	42	0.0734246	0.0734246	2168571	0	0
1	2168575	2168576	peak	1.3555	+	57	0.0441063	0.0441063	2168575	0	0
1	2168578	2168579	peak	3.64362	+	256	0.000227187	0.000227187	2168578	0	0
1	2168596	2168597	peak	4.25584	+	317	5.54836e-05	5.54836e-05	2168596	0	0
1	2168609	2168610	peak	1.1134	+	41	0.0770197	0.0770197	2168609	0	0
1	2169981	2169982	peak	1.95535	+	103	0.0110829	0.0110829	2169981	0	0
1	2169985	2169986	peak	3.69294	+	260	0.000202794	0.000202794	2169985	0	0
1	2170010	2170011	peak	2.34389	+	136	0.0045301	0.0045301	2170010	0	0
1	2170013	2170014	peak	1.45316	+	64	0.0352238	0.0352238	2170013	0	0
1	2170017	2170018	peak	1.22484	+	48	0.0595884	0.0595884	2170017	0	0
1	2170024	2170025	peak	1.98981	+	106	0.0102373	0.0102373	2170024	0	0
1	2170036	2170037	peak	1.1473	+	43	0.071236	0.071236	2170036	0	0
1	2170039	2170040	peak	5.27448	+	418	5.31519e-06	5.31519e-06	2170039	0	0
1	2184055	2184056	peak	1.29882	-	53	0.0502546	0.0502546	2184055	0	0
1	2184147	2184148	peak	1.74409	-	86	0.0180265	0.0180265	2184147	0	0
1	2190656	2190657	peak	1.47911	-	66	0.0331811	0.0331811	2190656	0	0
1	2193771	2193772	peak	1.21802	-	48	0.0605308	0.0605308	2193771	0	0
1	2193772	2193773	peak	1.27832	-	52	0.0526837	0.0526837	2193772	0	0
1	2193774	2193775	peak	1.50248	-	68	0.0314426	0.0314426	2193774	0	0
1	2193777	2193778	peak	5.39928	-	431	3.98766e-06	3.98766e-06	2193777	0	0
1	2193779	2193780	peak	10.7218	-	986	1.89759e-11	1.89759e-11	2193779	0	0
1	2193782	2193783	peak	1.22605	-	48	0.0594222	0.0594222	2193782	0	0
1	2200133	2200134	peak	1.34277	+	56	0.0454177	0.0454177	2200133	0	0
1	2200155	2200156	peak	5.32255	+	422	4.75824e-06	4.75824e-06	2200155	0	0
1	2200158	2200159	peak	8.97532	+	802	1.05847e-09	1.05847e-09	2200158	0	0
1	2200163	2200164	peak	1.3799	+	59	0.0416963	0.0416963	2200163	0	0
1	2200170	2200171	peak	2.40035	+	142	0.00397786	0.00397786	2200170	0	0
1	2212422	2212423	peak	1.24094	-	49	0.0574198	0.0574198	2212422	0	0
1	2215222	2215223	peak	2.90451	+	186	0.00124591	0.00124591	2215222	0	0
1	2215229	2215230	peak	1.46662	+	65	0.0341495	0.0341495	2215229	0	0
1	2215235	2215236	peak	1.45196	+	64	0.0353212	0.0353212	2215235	0	0
1	2215240	2215241	peak	1.05283	+	37	0.088547	0.088547	2215240	0	0
1	2215243	2215244	peak	1.01978	+	35	0.0955474	0.0955474	2215243	0	0
1	2215251	2215252	peak	1.57013	+	73	0.0269072	0.0269072	2215251	0	0
1	2222822	2222823	peak	1.23821	-	49	0.0577817	0.0577817	2222822	0	0
1	2222832	2222833	peak	2.09741	-	115	0.00799088	0.00799088	2222832	0	0
1	2222866	2222867	peak	1.18013	-	45	0.0660492	0.0660492	2222866	0	0
1	2222905	2222906	peak	1.49526	-	67	0.0319701	0.0319701	2222905	0	0
1	2222912	2222913	peak	1.78206	-	89	0.0165175	0.0165175	2222912	0	0
1	2223854	2223855	peak	1.14984	+	43	0.0708206	0.0708206	2223854	0	0
1	2223857	2223858	peak	1.19573	+	46	0.0637191	0.0637191	2223857	0	0
1	2224500	2224501	peak	1.27016	-	51	0.0536835	0.0536835	2224500	0	0
1	2225044	2225045	peak	1.10199	-	40	0.0790702	0.0790702	2225044	0	0
1	2225862	2225863	peak	1.78091	+	89	0.0165612	0.0165612	2225862	0	0
1	2226911	2226912	peak	1.31107	-	54	0.0488571	0.0488571	2226911	0	0
1	2238085	2238086	peak	1.07086	+	38	0.0849461	0.0849461	2238085	0	0
1	2238086	2238087	peak	4.67457	+	356	2.11559e-05	2.11559e-05	2238086	0	0
1	2238093	2238094	peak	2.08692	+	114	0.00818622	0.00818622	2238093	0	0
1	2248911	2248912	peak	1.06898	-	38	0.0853136	0.0853136	2248911	0	0
1	2248914	2248915	peak	2.69061	-	167	0.00203889	0.00203889	2248914	0	0
1	2248926	2248927	peak	1.22527	-	48	0.059529	0.059529	2248926	0	0
1	2248929	2248930	peak	1.02147	-	35	0.0951761	0.0951761	2248929	0	0
1	2248932	2248933	peak	3.34555	-	227	0.000451282	0.000451282	2248932	0	0
1	2248952	2248953	peak	1.32858	-	55	0.0469266	0.0469266	2248952	0	0
1	2249132	2249133	peak	3.53767	+	245	0.000289955	0.000289955	2249132	0	0
1	2249134	2249135	peak	1.14992	+	43	0.0708076	0.0708076	2249134	0	0
1	2249135	2249136	peak	1.02188	+	35	0.0950871	0.0950871	2249135	0	0
1	2249136	2249137	peak	1.27016	+	51	0.0536835	0.0536835	2249136	0	0
1	2249137	2249138	peak	3.31273	+	224	0.000486711	0.000486711	2249137	0	0
1	2249139	2249140	peak	1.16428	+	44	0.0685049	0.0685049	2249139	0	0
1	2249140	2249141	peak	7.29445	+	625	5.07628e-08	5.07628e-08	2249140	0	0
1	2249141	2249142	peak	1.42277	+	62	0.037777	0.037777	2249141	0	0
1	2249147	2249148	peak	3.1574	+	211	0.000695981	0.000695981	2249147	0	0
1	2249150	2249151	peak	1.78527	+	90	0.0163957	0.0163957	2249150	0	0
1	2249160	2249161	peak	2.29323	+	133	0.0050906	0.0050906	2249160	0	0
1	2249163	2249164	peak	1.71546	+	85	0.0192547	0.0192547	2249163	0	0
1	2254800	2254801	peak	3.39058	+	231	0.000406836	0.000406836	2254800	0	0
1	2254804	2254805	peak	3.85077	+	275	0.000141002	0.000141002	2254804	0	0
1	2260088	2260089	peak	2.37773	-	139	0.00419055	0.00419055	2260088	0	0
1	2260090	2260091	peak	1.34189	-	56	0.0455101	0.0455101	2260090	0	0
1	2262823	2262824	peak	2.17808	-	122	0.00663619	0.00663619	2262823	0	0
1	2262848	2262849	peak	1.17997	-	45	0.0660743	0.0660743	2262848	0	0
1	2262851	2262852	peak	1.16476	-	44	0.0684284	0.0684284	2262851	0	0
1	2262865	2262866	peak	1.10319	-	40	0.0788517	0.0788517	2262865	0	0
1	2262868	2262869	peak	1.19607	-	46	0.0636699	0.0636699	2262868	0	0
1	2276077	2276078	peak	1.03839	+	36	0.0915407	0.0915407	2276077	0	0
1	2277811	2277812	peak	1.58905	+	74	0.02576	0.02576	2277811	0	0
1	2277829	2277830	peak	2.41397	+	142	0.00385508	0.00385508	2277829	0	0
1	2277834	2277835	peak	1.65344	+	79	0.0222105	0.0222105	2277834	0	0
1	2277838	2277839	peak	2.29812	+	132	0.00503365	0.00503365	2277838	0	0
1	2287642	2287643	peak	1.97048	-	105	0.0107033	0.0107033	2287642	0	0
1	2287643	2287644	peak	1.03479	-	36	0.0923008	0.0923008	2287643	0	0
1	2287672	2287673	peak	1.36801	-	58	0.0428537	0.0428537	2287672	0	0
1	2287673	2287674	peak	2.31739	-	134	0.00481515	0.00481515	2287673	0	0
1	2287692	2287693	peak	1.43868	-	63	0.0364184	0.0364184	2287692	0	0
1	2287700	2287701	peak	3.15017	-	209	0.000707676	0.000707676	2287700	0	0
1	2287704	2287705	peak	1.65266	-	79	0.0222503	0.0222503	2287704	0	0
1	2287715	2287716	peak	1.71833	-	84	0.0191281	0.0191281	2287715	0	0
1	2287720	2287721	peak	1.16517	-	44	0.0683647	0.0683647	2287720	0	0
1	2287721	2287722	peak	9.00161	-	801	9.96294e-10	9.96294e-10	2287721	0	0
1	2291456	2291457	peak	1.28505	+	52	0.0518745	0.0518745	2291456	0	0
1	2291460	2291461	peak	2.75019	+	172	0.00177751	0.00177751	2291460	0	0
1	2291471	2291472	peak	1.19472	+	46	0.0638668	0.0638668	2291471	0	0
1	2299465	2299466	peak	2.65003	-	163	0.00223859	0.00223859	2299465	0	0
1	2316449	2316450	peak	1.16557	-	44	0.068301	0.068301	2316449	0	0
1	2333244	2333245	peak	1.44762	-	64	0.0356767	0.0356767	2333244	0	0
1	2333324	2333325	peak	2.02702	-	109	0.0093967	0.0093967	2333324	0	0
1	2333541	2333542	peak	1.28468	-	52	0.0519187	0.0519187	2333541	0	0
1	2338788	2338789	peak	2.26239	-	220	0.00546524	0.00546524	2338788	0	0
1	2339341	2339342	peak	2.31354	-	165	0.00485802	0.00485802	2339341	0	0
1	2339371	2339372	peak	1.30987	-	59	0.048992	0.048992	2339371	0	0
1	2339373	2339374	peak	1.57398	-	80	0.02667	0.02667	2339373	0	0
1	2339376	2339377	peak	10.7786	-	1088	1.66477e-11	1.66477e-11	2339376	0	0
1	2339382	2339383	peak	3.79228	-	291	0.000161332	0.000161332	2339382	0	0
1	2339384	2339385	peak	inf	-	11108	0	0	2339384	0	0
1	2339385	2339386	peak	2.6706	-	165	0.00213501	0.00213501	2339385	0	0
1	2339387	2339388	peak	3.65047	-	256	0.000223632	0.000223632	2339387	0	0
1	2341541	2341542	peak	1.34189	+	56	0.0455101	0.0455101	2341541	0	0
1	2344304	2344305	peak	1.11882	-	41	0.0760644	0.0760644	2344304	0	0
1	2355770	2355771	peak	1.4267	-	62	0.0374366	0.0374366	2355770	0	0
1	2366531	2366532	peak	1.08713	-	39	0.0818228	0.0818228	2366531	0	0
1	2368376	2368377	peak	1.38459	-	59	0.0412484	0.0412484	2368376	0	0
1	2368832	2368833	peak	2.9394	+	191	0.00114973	0.00114973	2368832	0	0
1	2368835	2368836	peak	1.48622	+	67	0.0326419	0.0326419	2368835	0	0
1	2368864	2368865	peak	1.15511	+	44	0.0699659	0.0699659	2368864	0	0
1	2368886	2368887	peak	2.48629	+	151	0.00326367	0.00326367	2368886	0	0
1	2368891	2368892	peak	1.42691	+	63	0.037419	0.037419	2368891	0	0
1	2368896	2368897	peak	1.05997	+	38	0.0871031	0.0871031	2368896	0	0
1	2368953	2368954	peak	1.02603	+	36	0.0941816	0.0941816	2368953	0	0
1	2374539	2374540	peak	1.10229	-	40	0.0790155	0.0790155	2374539	0	0
1	2379644	2379645	peak	1.80691	+	91	0.0155989	0.0155989	2379644	0	0
1	2379650	2379651	peak	1.10281	+	40	0.0789199	0.0789199	2379650	0	0
1	2379665	2379666	peak	5.18608	+	408	6.51515e-06	6.51515e-06	2379665	0	0
1	2379689	2379690	peak	1.38112	+	59	0.0415792	0.0415792	2379689	0	0
1	2379694	2379695	peak	2.15967	+	121	0.00692351	0.00692351	2379694	0	0
1	2392452	2392453	peak	1.58869	-	74	0.0257819	0.0257819	2392452	0	0
1	2393765	2393766	peak	3.7573	+	266	0.000174863	0.000174863	2393765	0	0
1	2395441	2395442	peak	1.31393	+	54	0.0485372	0.0485372	2395441	0	0
1	2395444	2395445	peak	1.9672	+	104	0.0107845	0.0107845	2395444	0	0
1	2405886	2405887	peak	1.04875	-	37	0.0893826	0.0893826	2405886	0	0
1	2405939	2405940	peak	2.55446	-	155	0.00278961	0.00278961	2405939	0	0
1	2405941	2405942	peak	12.6758	-	1194	2.10942e-13	2.10942e-13	2405941	0	0
1	2407539	2407540	peak	1.15	+	43	0.0707946	0.0707946	2407539	0	0
1	2407545	2407546	peak	1.03839	+	36	0.0915407	0.0915407	2407545	0	0
1	2407599	2407600	peak	9.52264	+	864	3.00163e-10	3.00163e-10	2407599	0	0
1	2407606	2407607	peak	1.13714	+	43	0.0729215	0.0729215	2407606	0	0
1	2407614	2407615	peak	2.51152	+	154	0.00307949	0.00307949	2407614	0	0
1	2407642	2407643	peak	1.61717	+	79	0.0241452	0.0241452	2407642	0	0
1	2407646	2407647	peak	1.56347	+	75	0.0273229	0.0273229	2407646	0	0
1	2407649	2407650	peak	1.37918	+	61	0.0417658	0.0417658	2407649	0	0
1	2409494	2409495	peak	1.42776	-	63	0.0373457	0.0373457	2409494	0	0
1	2409501	2409502	peak	1.79925	-	92	0.0158765	0.0158765	2409501	0	0
1	2409506	2409507	peak	1.21331	-	48	0.061191	0.061191	2409506	0	0
1	2409513	2409514	peak	1.31362	-	55	0.0485713	0.0485713	2409513	0	0
1	2409516	2409517	peak	1.43822	-	64	0.036457	0.036457	2409516	0	0
1	2409526	2409527	peak	3.07063	-	205	0.000849898	0.000849898	2409526	0	0
1	2409530	2409531	peak	1.97168	-	106	0.0106738	0.0106738	2409530	0	0
1	2409532	2409533	peak	1.11006	-	41	0.0776142	0.0776142	2409532	0	0
1	2409534	2409535	peak	5.03431	-	397	9.24037e-06	9.24037e-06	2409534	0	0
1	2409535	2409536	peak	7.98708	-	702	1.03019e-08	1.03019e-08	2409535	0	0
1	2409536	2409537	peak	1.74641	-	87	0.0179303	0.0179303	2409536	0	0
1	2409537	2409538	peak	1.61945	-	77	0.0240188	0.0240188	2409537	0	0
1	2409538	2409539	peak	9.94804	-	909	1.12709e-10	1.12709e-10	2409538	0	0
1	2409541	2409542	peak	3.79721	-	272	0.00015951	0.00015951	2409541	0	0
1	2409542	2409543	peak	1.54463	-	71	0.0285348	0.0285348	2409542	0	0
1	2409543	2409544	peak	inf	-	3204	0	0	2409543	0	0
1	2409544	2409545	peak	3.53177	-	245	0.000293918	0.000293918	2409544	0	0
1	2409545	2409546	peak	4.15436	-	305	7.0088e-05	7.0088e-05	2409545	0	0
1	2409546	2409547	peak	12.3293	-	1155	4.68514e-13	4.68514e-13	2409546	0	0
1	2409548	2409549	peak	2.70688	-	168	0.00196392	0.00196392	2409548	0	0
1	2409576	2409577	peak	1.1189	-	41	0.076051	0.076051	2409576	0	0
1	2411949	2411950	peak	2.08868	-	114	0.00815298	0.00815298	2411949	0	0
1	2411952	2411953	peak	1.69323	-	82	0.0202659	0.0202659	2411952	0	0
1	2411954	2411955	peak	1.45458	-	64	0.0351088	0.0351088	2411954	0	0
1	2412625	2412626	peak	1.1113	-	45	0.077393	0.077393	2412625	0	0
1	2412632	2412633	peak	1.69356	-	92	0.0202505	0.0202505	2412632	0	0
1	2412637	2412638	peak	1.14775	-	48	0.0711628	0.0711628	2412637	0	0
1	2412644	2412645	peak	1.26352	-	55	0.05451	0.05451	2412644	0	0
1	2412647	2412648	peak	1.41589	-	65	0.0383803	0.0383803	2412647	0	0
1	2412657	2412658	peak	3.02756	-	206	0.000938511	0.000938511	2412657	0	0
1	2412661	2412662	peak	1.95119	-	106	0.0111895	0.0111895	2412661	0	0
1	2412663	2412664	peak	1.1008	-	41	0.0792861	0.0792861	2412663	0	0
1	2412665	2412666	peak	4.96382	-	397	1.08687e-05	1.08687e-05	2412665	0	0
1	2412666	2412667	peak	7.85777	-	702	1.38749e-08	1.38749e-08	2412666	0	0
1	2412667	2412668	peak	1.72813	-	87	0.0187011	0.0187011	2412667	0	0
1	2412668	2412669	peak	1.60342	-	77	0.024922	0.024922	2412668	0	0
1	2412669	2412670	peak	9.80744	-	910	1.55796e-10	1.55796e-10	2412669	0	0
1	2412672	2412673	peak	3.75394	-	272	0.000176223	0.000176223	2412672	0	0
1	2412673	2412674	peak	1.53179	-	71	0.0293904	0.0293904	2412673	0	0
1	2412674	2412675	peak	inf	-	3209	0	0	2412674	0	0
1	2412675	2412676	peak	3.52243	-	245	0.000300307	0.000300307	2412675	0	0
1	2412676	2412677	peak	4.1459	-	305	7.14663e-05	7.14663e-05	2412676	0	0
1	2412677	2412678	peak	12.3183	-	1156	4.80505e-13	4.80505e-13	2412677	0	0
1	2412679	2412680	peak	2.70613	-	168	0.00196728	0.00196728	2412679	0	0
1	2412992	2412993	peak	2.82366	+	179	0.00150087	0.00150087	2412992	0	0
1	2412995	2412996	peak	6.29721	+	525	5.04421e-07	5.04421e-07	2412995	0	0
1	2413000	2413001	peak	2.36428	+	140	0.00432232	0.00432232	2413000	0	0
1	2416257	2416258	peak	1.15	+	43	0.0707946	0.0707946	2416257	0	0
1	2421875	2421876	peak	1.56327	-	74	0.0273355	0.0273355	2421875	0	0
1	2421910	2421911	peak	1.23627	-	51	0.058041	0.058041	2421910	0	0
1	2421931	2421932	peak	2.54941	-	158	0.00282222	0.00282222	2421931	0	0
1	2421936	2421937	peak	1.35821	-	58	0.0438322	0.0438322	2421936	0	0
1	2421937	2421938	peak	14.8085	-	1447	1.55431e-15	1.55431e-15	2421937	0	0
1	2421940	2421941	peak	inf	-	1723	0	0	2421940	0	0
1	2421941	2421942	peak	1.11538	-	41	0.0766693	0.0766693	2421941	0	0
1	2421942	2421943	peak	11.212	-	1041	6.13809e-12	6.13809e-12	2421942	0	0
1	2421944	2421945	peak	6.96912	-	592	1.0737e-07	1.0737e-07	2421944	0	0
1	2421946	2421947	peak	3.46022	-	238	0.000346561	0.000346561	2421946	0	0
1	2422250	2422251	peak	1.03859	+	36	0.0914969	0.0914969	2422250	0	0
1	2422256	2422257	peak	1.31383	+	54	0.0485478	0.0485478	2422256	0	0
1	2422265	2422266	peak	1.10274	+	40	0.0789336	0.0789336	2422265	0	0
1	2422271	2422272	peak	2.13498	+	118	0.00732851	0.00732851	2422271	0	0
1	2422282	2422283	peak	1.81781	+	92	0.0152123	0.0152123	2422282	0	0
1	2422286	2422287	peak	1.08602	+	39	0.0820312	0.0820312	2422286	0	0
1	2422297	2422298	peak	2.5389	+	154	0.00289134	0.00289134	2422297	0	0
1	2422304	2422305	peak	3.43534	+	238	0.000366992	0.000366992	2422304	0	0
1	2424052	2424053	peak	1.16549	+	44	0.0683137	0.0683137	2424052	0	0
1	2424060	2424061	peak	1.10274	+	40	0.0789336	0.0789336	2424060	0	0
1	2424063	2424064	peak	3.37572	+	230	0.000420997	0.000420997	2424063	0	0
1	2424092	2424093	peak	1.13252	+	42	0.073702	0.073702	2424092	0	0
1	2435743	2435744	peak	1.62831	-	77	0.0235335	0.0235335	2435743	0	0
1	2437474	2437475	peak	7.09413	+	603	8.0513e-08	8.0513e-08	2437474	0	0
1	2437475	2437476	peak	1.75411	+	87	0.0176153	0.0176153	2437475	0	0
1	2437476	2437477	peak	3.29574	+	223	0.000506132	0.000506132	2437476	0	0
1	2437477	2437478	peak	inf	+	4880	0	0	2437477	0	0
1	2437479	2437480	peak	1.02597	+	36	0.0941964	0.0941964	2437479	0	0
1	2437484	2437485	peak	1.62925	+	81	0.0234828	0.0234828	2437484	0	0
1	2437486	2437487	peak	5.82586	+	501	1.49327e-06	1.49327e-06	2437486	0	0
1	2437489	2437490	peak	3.16829	+	226	0.000678751	0.000678751	2437489	0	0
1	2437493	2437494	peak	1.84479	+	103	0.0142959	0.0142959	2437493	0	0
1	2437495	2437496	peak	1.52877	+	79	0.029596	0.029596	2437495	0	0
1	2437508	2437509	peak	1.19427	+	53	0.0639337	0.0639337	2437508	0	0
1	2437509	2437510	peak	3.14671	+	245	0.000713328	0.000713328	2437509	0	0
1	2437513	2437514	peak	2.82515	+	211	0.00149573	0.00149573	2437513	0	0
1	2439418	2439419	peak	1.10749	+	41	0.0780749	0.0780749	2439418	0	0
1	2443919	2443920	peak	1.1179	+	41	0.0762255	0.0762255	2443919	0	0
1	2444081	2444082	peak	1.34072	+	56	0.0456334	0.0456334	2444081	0	0
1	2454846	2454847	peak	1.0872	+	39	0.0818089	0.0818089	2454846	0	0
1	2454882	2454883	peak	2.21587	+	125	0.00608313	0.00608313	2454882	0	0
1	2454886	2454887	peak	15.2556	+	2492	5.55112e-16	5.55112e-16	2454886	0	0
1	2454895	2454896	peak	1.11741	+	42	0.0763116	0.0763116	2454895	0	0
1	2458272	2458273	peak	2.74089	+	171	0.00181598	0.00181598	2458272	0	0
1	2458276	2458277	peak	inf	+	1760	0	0	2458276	0	0
1	2458280	2458281	peak	1.44156	+	64	0.0361779	0.0361779	2458280	0	0
1	2458282	2458283	peak	2.19405	+	125	0.00639662	0.00639662	2458282	0	0
1	2458284	2458285	peak	4.72431	+	368	1.88665e-05	1.88665e-05	2458284	0	0
1	2458288	2458289	peak	4.71634	+	369	1.92157e-05	1.92157e-05	2458288	0	0
1	2465454	2465455	peak	1.3558	-	59	0.044076	0.044076	2465454	0	0
1	2465459	2465460	peak	12.1	-	1173	7.94254e-13	7.94254e-13	2465459	0	0
1	2465462	2465463	peak	10.0822	-	937	8.27565e-11	8.27565e-11	2465462	0	0
1	2465463	2465464	peak	4.19036	-	315	6.45121e-05	6.45121e-05	2465463	0	0
1	2465464	2465465	peak	1.79794	-	92	0.0159242	0.0159242	2465464	0	0
1	2465466	2465467	peak	14.6758	-	3570	2.10942e-15	2.10942e-15	2465466	0	0
1	2466991	2466992	peak	2.07288	-	113	0.00845511	0.00845511	2466991	0	0
1	2467001	2467002	peak	1.9777	-	105	0.0105268	0.0105268	2467001	0	0
1	2467028	2467029	peak	1.78191	-	89	0.016523	0.016523	2467028	0	0
1	2467031	2467032	peak	1.28505	-	52	0.0518745	0.0518745	2467031	0	0
1	2467156	2467157	peak	1.08727	+	39	0.0817951	0.0817951	2467156	0	0
1	2467160	2467161	peak	5.43308	+	432	3.68913e-06	3.68913e-06	2467160	0	0
1	2467162	2467163	peak	1.26916	+	51	0.0538073	0.0538073	2467162	0	0
1	2467170	2467171	peak	2.2017	+	124	0.00628489	0.00628489	2467170	0	0
1	2467187	2467188	peak	2.33508	+	136	0.004623	0.004623	2467187	0	0
1	2474924	2474925	peak	3.42168	-	234	0.000378722	0.000378722	2474924	0	0
1	2474926	2474927	peak	2.23026	-	126	0.00588496	0.00588496	2474926	0	0
1	2475393	2475394	peak	1.03284	+	59	0.0927176	0.0927176	2475393	0	0
1	2477157	2477158	peak	1.93123	+	101	0.0117157	0.0117157	2477157	0	0
1	2488026	2488027	peak	1.76887	-	88	0.0170268	0.0170268	2488026	0	0
1	2493246	2493247	peak	1.2698	-	51	0.0537285	0.0537285	2493246	0	0
1	2498611	2498612	peak	1.42606	-	62	0.0374917	0.0374917	2498611	0	0
1	2498640	2498641	peak	1.21073	-	47	0.0615565	0.0615565	2498640	0	0
1	2498657	2498658	peak	1.05487	-	37	0.0881303	0.0881303	2498657	0	0
1	2498660	2498661	peak	1.03866	-	36	0.0914823	0.0914823	2498660	0	0
1	2513455	2513456	peak	1.02215	-	35	0.0950278	0.0950278	2513455	0	0
1	2535323	2535324	peak	2.58407	+	157	0.00260571	0.00260571	2535323	0	0
1	2535341	2535342	peak	1.53401	+	70	0.0292409	0.0292409	2535341	0	0
1	2535345	2535346	peak	1.20962	+	47	0.0617137	0.0617137	2535345	0	0
1	2535349	2535350	peak	2.35147	+	137	0.00445174	0.00445174	2535349	0	0
1	2535352	2535353	peak	1.90136	+	99	0.0125498	0.0125498	2535352	0	0
1	2535361	2535362	peak	1.5828	+	74	0.0261338	0.0261338	2535361	0	0
1	2535362	2535363	peak	2.33528	+	136	0.00462083	0.00462083	2535362	0	0
1	2535368	2535369	peak	1.1137	+	41	0.0769657	0.0769657	2535368	0	0
1	2535369	2535370	peak	2.4441	+	146	0.0035967	0.0035967	2535369	0	0
1	2535373	2535374	peak	2.44149	+	146	0.00361832	0.00361832	2535373	0	0
1	2542276	2542277	peak	1.08668	-	39	0.0819061	0.0819061	2542276	0	0
1	2542291	2542292	peak	2.14718	-	119	0.00712552	0.00712552	2542291	0	0
1	2559148	2559149	peak	1.11897	-	41	0.0760376	0.0760376	2559148	0	0
1	2560402	2560403	peak	1.66678	-	80	0.0215386	0.0215386	2560402	0	0
1	2565141	2565142	peak	2.63983	-	162	0.00229178	0.00229178	2565141	0	0
1	2567496	2567497	peak	1.81943	+	92	0.0151556	0.0151556	2567496	0	0
1	2567508	2567509	peak	1.41189	+	61	0.0387356	0.0387356	2567508	0	0
1	2576689	2576690	peak	1.20681	-	47	0.0621137	0.0621137	2576689	0	0
1	2576692	2576693	peak	8.91436	-	796	1.21797e-09	1.21797e-09	2576692	0	0
1	2576693	2576694	peak	1.3413	-	56	0.0455717	0.0455717	2576693	0	0
1	2576695	2576696	peak	1.32703	-	55	0.047094	0.047094	2576695	0	0
1	2576697	2576698	peak	3.3648	-	229	0.000431713	0.000431713	2576697	0	0
1	2576698	2576699	peak	1.99114	-	106	0.010206	0.010206	2576698	0	0
1	2576702	2576703	peak	1.94346	-	102	0.0113903	0.0113903	2576702	0	0
1	2580606	2580607	peak	1.26916	-	51	0.0538073	0.0538073	2580606	0	0
1	2580616	2580617	peak	1.03804	-	36	0.0916137	0.0916137	2580616	0	0
1	2580620	2580621	peak	1.3281	-	55	0.0469789	0.0469789	2580620	0	0
1	2583329	2583330	peak	1.88233	-	97	0.0131119	0.0131119	2583329	0	0
1	2586730	2586731	peak	1.38276	-	59	0.0414233	0.0414233	2586730	0	0
1	2586732	2586733	peak	5.14745	-	404	7.12114e-06	7.12114e-06	2586732	0	0
1	2586734	2586735	peak	2.3441	-	136	0.00452795	0.00452795	2586734	0	0
1	2586736	2586737	peak	1.25546	-	50	0.0555313	0.0555313	2586736	0	0
1	2590273	2590274	peak	1.1959	-	46	0.0636945	0.0636945	2590273	0	0
1	2631067	2631068	peak	1.07107	+	38	0.0849038	0.0849038	2631067	0	0
1	2636007	2636008	peak	1.52236	+	69	0.0300361	0.0300361	2636007	0	0
1	2636023	2636024	peak	3.19299	+	213	0.00064123	0.00064123	2636023	0	0
1	2636024	2636025	peak	1.35094	+	57	0.0445717	0.0445717	2636024	0	0
1	2636028	2636029	peak	1.84444	+	95	0.0143073	0.0143073	2636028	0	0
1	2636029	2636030	peak	4.2787	+	321	5.26377e-05	5.26377e-05	2636029	0	0
1	2636030	2636031	peak	1.72886	+	86	0.0186699	0.0186699	2636030	0	0
1	2636032	2636033	peak	1.81536	+	93	0.0152981	0.0152981	2636032	0	0
1	2636033	2636034	peak	inf	+	2041	0	0	2636033	0	0
1	2636035	2636036	peak	15.3525	+	2498	4.44089e-16	4.44089e-16	2636035	0	0
1	2636037	2636038	peak	4.34478	+	339	4.52082e-05	4.52082e-05	2636037	0	0
1	2636039	2636040	peak	3.19188	+	224	0.000642862	0.000642862	2636039	0	0
1	2638234	2638235	peak	2.68294	+	166	0.00207521	0.00207521	2638234	0	0
1	2638237	2638238	peak	3.7502	+	266	0.000177745	0.000177745	2638237	0	0
1	2638243	2638244	peak	1.08573	+	39	0.0820868	0.0820868	2638243	0	0
1	2641744	2641745	peak	1.91733	-	126	0.0120967	0.0120967	2641744	0	0
1	2641746	2641747	peak	1.94536	-	129	0.0113406	0.0113406	2641746	0	0
1	2641747	2641748	peak	1.24442	-	60	0.0569619	0.0569619	2641747	0	0
1	2641748	2641749	peak	1.07042	-	46	0.0850309	0.0850309	2641748	0	0
1	2641749	2641750	peak	15.3525	-	1730	4.44089e-16	4.44089e-16	2641749	0	0
1	2641752	2641753	peak	15.3525	-	3350	4.44089e-16	4.44089e-16	2641752	0	0
1	2641754	2641755	peak	7.52559	-	769	2.9813e-08	2.9813e-08	2641754	0	0
1	2641755	2641756	peak	4.08766	-	352	8.17216e-05	8.17216e-05	2641755	0	0
1	2641756	2641757	peak	6.04582	-	583	8.99861e-07	8.99861e-07	2641756	0	0
1	2641758	2641759	peak	5.7916	-	546	1.61583e-06	1.61583e-06	2641758	0	0
1	2641762	2641763	peak	15.6536	-	5991	2.22045e-16	2.22045e-16	2641762	0	0
1	2641763	2641764	peak	1.31346	-	59	0.0485888	0.0485888	2641763	0	0
1	2641764	2641765	peak	1.63567	-	85	0.0231384	0.0231384	2641764	0	0
1	2641767	2641768	peak	4.7722	-	391	1.68966e-05	1.68966e-05	2641767	0	0
1	2641768	2641769	peak	1.39171	-	63	0.0405783	0.0405783	2641768	0	0
1	2641775	2641776	peak	1.36599	-	60	0.0430535	0.0430535	2641775	0	0
1	2641776	2641777	peak	1.25569	-	52	0.055502	0.055502	2641776	0	0
1	2641777	2641778	peak	15.6536	-	4051	2.22045e-16	2.22045e-16	2641777	0	0
1	2641780	2641781	peak	1.4817	-	68	0.0329838	0.0329838	2641780	0	0
1	2641781	2641782	peak	5.35012	-	437	4.46564e-06	4.46564e-06	2641781	0	0
1	2641782	2641783	peak	3.57551	-	253	0.00026576	0.00026576	2641782	0	0
1	2641783	2641784	peak	2.88301	-	187	0.00130914	0.00130914	2641783	0	0
1	2641785	2641786	peak	1.97201	-	106	0.0106657	0.0106657	2641785	0	0
1	2641789	2641790	peak	inf	-	12575	0	0	2641789	0	0
1	2641790	2641791	peak	1.22069	-	48	0.0601602	0.0601602	2641790	0	0
1	2641793	2641794	peak	inf	-	1825	0	0	2641793	0	0
1	2641795	2641796	peak	2.95651	-	191	0.00110532	0.00110532	2641795	0	0
1	2641800	2641801	peak	1.84347	-	94	0.0143393	0.0143393	2641800	0	0
1	2641806	2641807	peak	2.49339	-	149	0.00321075	0.00321075	2641806	0	0
1	2641826	2641827	peak	2.5167	-	151	0.00304298	0.00304298	2641826	0	0
1	2641828	2641829	peak	3.69368	-	260	0.000202452	0.000202452	2641828	0	0
1	2641832	2641833	peak	3.97365	-	287	0.000106256	0.000106256	2641832	0	0
1	2642204	2642205	peak	1.62742	+	77	0.0235818	0.0235818	2642204	0	0
1	2642212	2642213	peak	1.76773	+	88	0.0170714	0.0170714	2642212	0	0
1	2671822	2671823	peak	1.28329	-	52	0.0520845	0.0520845	2671822	0	0
1	2671824	2671825	peak	7.6065	-	656	2.47459e-08	2.47459e-08	2671824	0	0
1	2672456	2672457	peak	1.4267	+	62	0.0374366	0.0374366	2672456	0	0
1	2672466	2672467	peak	1.25528	+	50	0.0555542	0.0555542	2672466	0	0
1	2672498	2672499	peak	3.08893	+	203	0.000814832	0.000814832	2672498	0	0
1	2675812	2675813	peak	1.37103	+	58	0.0425566	0.0425566	2675812	0	0
1	2675844	2675845	peak	1.06977	+	38	0.0851581	0.0851581	2675844	0	0
1	2675887	2675888	peak	1.08301	+	39	0.0826018	0.0826018	2675887	0	0
1	2684003	2684004	peak	1.49356	-	67	0.0320954	0.0320954	2684003	0	0
1	2684246	2684247	peak	1.42692	+	62	0.0374182	0.0374182	2684246	0	0
1	2684266	2684267	peak	1.25519	+	50	0.0555657	0.0555657	2684266	0	0
1	2684268	2684269	peak	2.00257	+	107	0.00994096	0.00994096	2684268	0	0
1	2684279	2684280	peak	1.36922	+	58	0.0427348	0.0427348	2684279	0	0
1	2684286	2684287	peak	1.2383	+	49	0.0577701	0.0577701	2684286	0	0
1	2684288	2684289	peak	2.27058	+	130	0.00536316	0.00536316	2684288	0	0
1	2684289	2684290	peak	14.7785	+	1805	1.66533e-15	1.66533e-15	2684289	0	0
1	2684290	2684291	peak	2.39026	+	141	0.00407134	0.00407134	2684290	0	0
1	2684302	2684303	peak	4.39551	+	332	4.02244e-05	4.02244e-05	2684302	0	0
1	2684304	2684305	peak	1.37615	+	59	0.0420586	0.0420586	2684304	0	0
1	2688580	2688581	peak	1.21107	-	47	0.0615082	0.0615082	2688580	0	0
1	2688588	2688589	peak	1.39921	-	60	0.0398831	0.0398831	2688588	0	0
1	2688594	2688595	peak	1.46838	-	65	0.0340107	0.0340107	2688594	0	0
1	2694168	2694169	peak	4.78363	-	373	1.64579e-05	1.64579e-05	2694168	0	0
1	2694200	2694201	peak	1.80871	-	92	0.0155342	0.0155342	2694200	0	0
1	2694361	2694362	peak	2.48313	-	153	0.00328756	0.00328756	2694361	0	0
1	2694365	2694366	peak	8.06873	-	724	8.53634e-09	8.53634e-09	2694365	0	0
1	2694368	2694369	peak	1.49464	-	68	0.0320155	0.0320155	2694368	0	0
1	2694370	2694371	peak	2.61719	-	162	0.00241443	0.00241443	2694370	0	0
1	2694371	2694372	peak	1.09802	-	40	0.0797957	0.0797957	2694371	0	0
1	2694372	2694373	peak	3.62925	-	256	0.00023483	0.00023483	2694372	0	0
1	2694376	2694377	peak	4.01092	-	292	9.75162e-05	9.75162e-05	2694376	0	0
1	2694429	2694430	peak	1.07122	-	38	0.0848755	0.0848755	2694429	0	0
1	2694431	2694432	peak	1.75706	-	87	0.017496	0.017496	2694431	0	0
1	2696474	2696475	peak	1.02181	+	35	0.0951019	0.0951019	2696474	0	0
1	2696489	2696490	peak	1.35629	+	57	0.0440256	0.0440256	2696489	0	0
1	2696496	2696497	peak	1.86737	+	96	0.0135717	0.0135717	2696496	0	0
1	2696527	2696528	peak	1.86416	+	96	0.0136721	0.0136721	2696527	0	0
1	2703337	2703338	peak	1.25573	+	50	0.055497	0.055497	2703337	0	0
1	2703366	2703367	peak	1.07035	+	38	0.085045	0.085045	2703366	0	0
1	2706969	2706970	peak	1.02222	+	35	0.0950129	0.0950129	2706969	0	0
1	2710903	2710904	peak	2.27334	-	130	0.00532914	0.00532914	2710903	0	0
1	2710908	2710909	peak	1.80559	-	91	0.0156462	0.0156462	2710908	0	0
1	2710910	2710911	peak	2.44797	-	145	0.00356476	0.00356476	2710910	0	0
1	2712855	2712856	peak	1.18087	+	45	0.0659365	0.0659365	2712855	0	0
1	2712872	2712873	peak	1.41304	+	61	0.0386327	0.0386327	2712872	0	0
1	2712877	2712878	peak	1.75664	+	87	0.017513	0.017513	2712877	0	0
1	2712892	2712893	peak	1.71819	+	84	0.0191341	0.0191341	2712892	0	0
1	2712896	2712897	peak	2.08727	+	114	0.00817956	0.00817956	2712896	0	0
1	2712908	2712909	peak	2.29852	+	132	0.00502901	0.00502901	2712908	0	0
1	2712910	2712911	peak	1.14952	+	43	0.0708724	0.0708724	2712910	0	0
1	2712926	2712927	peak	12.5405	+	1181	2.88103e-13	2.88103e-13	2712926	0	0
1	2712928	2712929	peak	2.10392	+	116	0.00787187	0.00787187	2712928	0	0
1	2712987	2712988	peak	1.14445	+	43	0.0717047	0.0717047	2712987	0	0
1	2716353	2716354	peak	1.62631	-	80	0.0236421	0.0236421	2716353	0	0
1	2716361	2716362	peak	2.18287	-	124	0.00656345	0.00656345	2716361	0	0
1	2716365	2716366	peak	5.14412	-	409	7.17588e-06	7.17588e-06	2716365	0	0
1	2716373	2716374	peak	1.05114	-	37	0.0888924	0.0888924	2716373	0	0
1	2716391	2716392	peak	1.75088	-	87	0.0177466	0.0177466	2716391	0	0
1	2716395	2716396	peak	1.22276	-	48	0.059874	0.059874	2716395	0	0
1	2716398	2716399	peak	1.10071	-	40	0.0793026	0.0793026	2716398	0	0
1	2716402	2716403	peak	1.76872	-	88	0.0170324	0.0170324	2716402	0	0
1	2721910	2721911	peak	1.24032	-	49	0.0575014	0.0575014	2721910	0	0
1	2735790	2735791	peak	1.1347	-	42	0.0733323	0.0733323	2735790	0	0
1	2746743	2746744	peak	2.06355	-	112	0.00863875	0.00863875	2746743	0	0
1	2746746	2746747	peak	3.97325	-	287	0.000106354	0.000106354	2746746	0	0
1	2747926	2747927	peak	2.71331	-	298	0.00193503	0.00193503	2747926	0	0
1	2747931	2747932	peak	5.63041	-	813	2.34203e-06	2.34203e-06	2747931	0	0
1	2747935	2747936	peak	1.68149	-	140	0.0208214	0.0208214	2747935	0	0
1	2751202	2751203	peak	1.0679	-	38	0.0855259	0.0855259	2751202	0	0
1	2751208	2751209	peak	2.49689	-	150	0.00318499	0.00318499	2751208	0	0
1	2751233	2751234	peak	2.05036	-	111	0.00890516	0.00890516	2751233	0	0
1	2751255	2751256	peak	1.02201	-	35	0.0950574	0.0950574	2751255	0	0
1	2752155	2752156	peak	2.72931	+	170	0.00186505	0.00186505	2752155	0	0
1	2752160	2752161	peak	3.52404	+	244	0.000299198	0.000299198	2752160	0	0
1	2759727	2759728	peak	1.14865	-	43	0.0710152	0.0710152	2759727	0	0
1	2759785	2759786	peak	1.19405	-	46	0.0639654	0.0639654	2759785	0	0
1	2759799	2759800	peak	1.76929	-	88	0.0170101	0.0170101	2759799	0	0
1	2762642	2762643	peak	1.43943	+	63	0.0363553	0.0363553	2762642	0	0
1	2771442	2771443	peak	1.7058	-	83	0.0196878	0.0196878	2771442	0	0
1	2771704	2771705	peak	1.05495	+	37	0.0881159	0.0881159	2771704	0	0
1	2771711	2771712	peak	3.38696	+	231	0.00041024	0.00041024	2771711	0	0
1	2801068	2801069	peak	1.61448	+	76	0.0242954	0.0242954	2801068	0	0
1	2808871	2808872	peak	3.42168	+	234	0.000378722	0.000378722	2808871	0	0
1	2808873	2808874	peak	1.45426	+	64	0.0351353	0.0351353	2808873	0	0
1	2808879	2808880	peak	1.08683	+	39	0.0818784	0.0818784	2808879	0	0
1	2808886	2808887	peak	1.29892	+	53	0.0502438	0.0502438	2808886	0	0
1	2808892	2808893	peak	1.62666	+	77	0.0236232	0.0236232	2808892	0	0
1	2808898	2808899	peak	2.27176	+	130	0.00534856	0.00534856	2808898	0	0
1	2811177	2811178	peak	1.83644	-	94	0.0145733	0.0145733	2811177	0	0
1	2811180	2811181	peak	1.30974	-	54	0.0490068	0.0490068	2811180	0	0
1	2811182	2811183	peak	1.54427	-	71	0.0285582	0.0285582	2811182	0	0
1	2811184	2811185	peak	2.02329	-	109	0.00947787	0.00947787	2811184	0	0
1	2811187	2811188	peak	1.46684	-	65	0.0341321	0.0341321	2811187	0	0
1	2811188	2811189	peak	2.89251	-	185	0.00128082	0.00128082	2811188	0	0
1	2825254	2825255	peak	2.22872	-	126	0.00590588	0.00590588	2825254	0	0
1	2825260	2825261	peak	3.20705	-	214	0.000620799	0.000620799	2825260	0	0
1	2825270	2825271	peak	1.21047	-	47	0.0615928	0.0615928	2825270	0	0
1	2825276	2825277	peak	1.22544	-	48	0.0595053	0.0595053	2825276	0	0
1	2827062	2827063	peak	3.33719	+	226	0.00046005	0.00046005	2827062	0	0
1	2827094	2827095	peak	4.18417	+	308	6.54382e-05	6.54382e-05	2827094	0	0
1	2827098	2827099	peak	2.47985	+	148	0.00331249	0.00331249	2827098	0	0
1	2827112	2827113	peak	8.74811	+	782	1.78605e-09	1.78605e-09	2827112	0	0
1	2827114	2827115	peak	7.68918	+	672	2.04559e-08	2.04559e-08	2827114	0	0
1	2827115	2827116	peak	6.31271	+	529	4.86732e-07	4.86732e-07	2827115	0	0
1	2827117	2827118	peak	inf	+	2865	0	0	2827117	0	0
1	2827118	2827119	peak	1.54266	+	72	0.0286641	0.0286641	2827118	0	0
1	2827123	2827124	peak	2.97725	+	198	0.00105379	0.00105379	2827123	0	0
1	2827127	2827128	peak	inf	+	2548	0	0	2827127	0	0
1	2828751	2828752	peak	1.54309	+	71	0.0286361	0.0286361	2828751	0	0
1	2839130	2839131	peak	1.11905	+	41	0.0760241	0.0760241	2839130	0	0
1	2839132	2839133	peak	1.0872	+	39	0.0818089	0.0818089	2839132	0	0
1	2839143	2839144	peak	2.59319	+	158	0.00255161	0.00255161	2839143	0	0
1	2847773	2847774	peak	6.68461	-	567	2.06724e-07	2.06724e-07	2847773	0	0
1	2847777	2847778	peak	10.513	-	969	3.06885e-11	3.06885e-11	2847777	0	0
1	2847778	2847779	peak	1.16444	-	44	0.0684794	0.0684794	2847778	0	0
1	2847779	2847780	peak	3.96014	-	286	0.000109613	0.000109613	2847779	0	0
1	2848349	2848350	peak	1.31345	+	54	0.0485904	0.0485904	2848349	0	0
1	2852453	2852454	peak	2.24214	+	127	0.00572614	0.00572614	2852453	0	0
1	2852459	2852460	peak	1.46827	+	65	0.0340193	0.0340193	2852459	0	0
1	2856161	2856162	peak	1.27007	+	51	0.0536947	0.0536947	2856161	0	0
1	2873546	2873547	peak	1.88156	+	97	0.0131352	0.0131352	2873546	0	0
1	2882522	2882523	peak	2.08798	+	114	0.00816626	0.00816626	2882522	0	0
1	2882524	2882525	peak	1.13439	+	42	0.0733851	0.0733851	2882524	0	0
1	2882530	2882531	peak	1.35649	+	57	0.0440055	0.0440055	2882530	0	0
1	2882542	2882543	peak	1.75495	+	87	0.0175812	0.0175812	2882542	0	0
1	2882578	2882579	peak	1.16258	+	44	0.068773	0.068773	2882578	0	0
1	2882579	2882580	peak	1.06862	+	38	0.0853843	0.0853843	2882579	0	0
1	2882614	2882615	peak	1.50568	+	68	0.0312119	0.0312119	2882614	0	0
1	2884408	2884409	peak	1.35689	+	57	0.0439652	0.0439652	2884408	0	0
1	2884410	2884411	peak	3.68397	+	259	0.000207027	0.000207027	2884410	0	0
1	2884413	2884414	peak	3.97285	+	287	0.000106452	0.000106452	2884413	0	0
1	2884417	2884418	peak	1.42628	+	62	0.0374733	0.0374733	2884417	0	0
1	2884424	2884425	peak	1.76773	+	88	0.0170714	0.0170714	2884424	0	0
1	2884436	2884437	peak	2.66939	+	165	0.00214099	0.00214099	2884436	0	0
1	2904820	2904821	peak	1.46794	-	65	0.0340453	0.0340453	2904820	0	0
1	2925898	2925899	peak	1.14992	-	43	0.0708076	0.0708076	2925898	0	0
1	2927671	2927672	peak	1.60235	+	75	0.0249832	0.0249832	2927671	0	0
1	2927687	2927688	peak	2.00274	+	107	0.00993713	0.00993713	2927687	0	0
1	2927698	2927699	peak	1.84272	+	94	0.0143641	0.0143641	2927698	0	0
1	2927699	2927700	peak	3.05338	+	200	0.000884334	0.000884334	2927699	0	0
1	2927702	2927703	peak	9.84497	+	898	1.42899e-10	1.42899e-10	2927702	0	0
1	2927705	2927706	peak	2.77303	+	176	0.00168643	0.00168643	2927705	0	0
1	2927738	2927739	peak	1.16133	+	45	0.0689712	0.0689712	2927738	0	0
1	2939286	2939287	peak	2.70688	-	168	0.00196392	0.00196392	2939286	0	0
1	2942247	2942248	peak	1.26716	-	51	0.0540553	0.0540553	2942247	0	0
1	2942253	2942254	peak	8.34294	-	734	4.54001e-09	4.54001e-09	2942253	0	0
1	2942254	2942255	peak	3.35389	-	228	0.000442705	0.000442705	2942254	0	0
1	2942257	2942258	peak	2.9247	-	188	0.00118933	0.00118933	2942257	0	0
1	2942259	2942260	peak	1.39797	-	60	0.0399974	0.0399974	2942259	0	0
1	2942266	2942267	peak	1.42649	-	62	0.0374549	0.0374549	2942266	0	0
1	2945929	2945930	peak	1.11195	-	41	0.0772762	0.0772762	2945929	0	0
1	2945950	2945951	peak	5.00903	-	391	9.79421e-06	9.79421e-06	2945950	0	0
1	2945954	2945955	peak	5.41325	-	431	3.86142e-06	3.86142e-06	2945954	0	0
1	2946227	2946228	peak	1.84452	+	94	0.0143047	0.0143047	2946227	0	0
1	2946241	2946242	peak	1.19565	+	46	0.0637314	0.0637314	2946241	0	0
1	2946246	2946247	peak	1.22553	+	48	0.0594934	0.0594934	2946246	0	0
1	2946249	2946250	peak	1.95405	+	103	0.011116	0.011116	2946249	0	0
1	2946260	2946261	peak	1.38245	+	59	0.0414525	0.0414525	2946260	0	0
1	2946264	2946265	peak	1.93881	+	102	0.0115131	0.0115131	2946264	0	0
1	2946276	2946277	peak	2.74262	+	172	0.00180874	0.00180874	2946276	0	0
1	2946283	2946284	peak	1.28108	+	52	0.0523504	0.0523504	2946283	0	0
1	2946285	2946286	peak	1.20715	+	47	0.0620651	0.0620651	2946285	0	0
1	2955689	2955690	peak	1.56173	-	72	0.027433	0.027433	2955689	0	0
1	2955695	2955696	peak	1.08735	-	39	0.0817812	0.0817812	2955695	0	0
1	2972198	2972199	peak	15.9546	-	3201	1.11022e-16	1.11022e-16	2972198	0	0
1	2976685	2976686	peak	2.00652	-	110	0.00985109	0.00985109	2976685	0	0
1	2976691	2976692	peak	1.32625	-	56	0.0471793	0.0471793	2976691	0	0
1	2976695	2976696	peak	15.3525	-	1717	4.44089e-16	4.44089e-16	2976695	0	0
1	2976698	2976699	peak	4.35129	-	326	4.45354e-05	4.45354e-05	2976698	0	0
1	2976746	2976747	peak	1.58869	-	74	0.0257819	0.0257819	2976746	0	0
1	2982581	2982582	peak	1.8571	-	95	0.0138963	0.0138963	2982581	0	0
1	2982587	2982588	peak	1.15	-	43	0.0707946	0.0707946	2982587	0	0
1	2987392	2987393	peak	1.11905	-	41	0.0760241	0.0760241	2987392	0	0
1	2989376	2989377	peak	8.08135	+	705	8.29179e-09	8.29179e-09	2989376	0	0
1	2989382	2989383	peak	1.5074	+	68	0.0310886	0.0310886	2989382	0	0
1	2989386	2989387	peak	1.31269	+	54	0.0486757	0.0486757	2989386	0	0
1	2994407	2994408	peak	1.41294	+	61	0.0386421	0.0386421	2994407	0	0
1	2994419	2994420	peak	2.76175	+	173	0.00173083	0.00173083	2994419	0	0
1	2994422	2994423	peak	1.3561	+	57	0.0440458	0.0440458	2994422	0	0
1	2994429	2994430	peak	1.22475	+	48	0.0596003	0.0596003	2994429	0	0
1	3001279	3001280	peak	1.37013	-	58	0.0426456	0.0426456	3001279	0	0
1	3001301	3001302	peak	1.02222	-	35	0.0950129	0.0950129	3001301	0	0
1	3003761	3003762	peak	2.71797	-	169	0.00191437	0.00191437	3003761	0	0
1	3003903	3003904	peak	1.11882	+	41	0.0760644	0.0760644	3003903	0	0
1	3009056	3009057	peak	inf	+	1599	0	0	3009056	0	0
1	3009058	3009059	peak	10.3656	+	966	4.30971e-11	4.30971e-11	3009058	0	0
1	3009061	3009062	peak	1.77774	+	91	0.0166824	0.0166824	3009061	0	0
1	3009063	3009064	peak	2.24583	+	131	0.00567773	0.00567773	3009063	0	0
1	3012364	3012365	peak	1.57571	-	73	0.0265636	0.0265636	3012364	0	0
1	3015008	3015009	peak	1.63048	-	78	0.0234162	0.0234162	3015008	0	0
1	3015018	3015019	peak	1.34946	-	57	0.044724	0.044724	3015018	0	0
1	3015034	3015035	peak	1.03362	-	36	0.0925498	0.0925498	3015034	0	0
1	3015037	3015038	peak	1.17529	-	45	0.0667901	0.0667901	3015037	0	0
1	3015045	3015046	peak	2.43908	-	145	0.00363852	0.00363852	3015045	0	0
1	3015056	3015057	peak	1.77848	-	89	0.0166542	0.0166542	3015056	0	0
1	3015058	3015059	peak	2.35292	-	137	0.00443695	0.00443695	3015058	0	0
1	3015060	3015061	peak	3.38532	-	231	0.000411796	0.000411796	3015060	0	0
1	3015071	3015072	peak	1.07093	-	38	0.084932	0.084932	3015071	0	0
1	3015081	3015082	peak	1.03859	-	36	0.0914969	0.0914969	3015081	0	0
1	3015385	3015386	peak	1.56149	+	72	0.0274482	0.0274482	3015385	0	0
1	3015393	3015394	peak	3.93754	+	284	0.000115468	0.000115468	3015393	0	0
1	3015396	3015397	peak	3.10546	+	205	0.000784408	0.000784408	3015396	0	0
1	3015412	3015413	peak	1.06389	+	38	0.0863202	0.0863202	3015412	0	0
1	3015445	3015446	peak	2.68343	+	169	0.00207286	0.00207286	3015445	0	0
1	3015448	3015449	peak	1.4379	+	64	0.0364841	0.0364841	3015448	0	0
1	3015452	3015453	peak	4.8523	+	381	1.40508e-05	1.40508e-05	3015452	0	0
1	3015455	3015456	peak	3.34654	+	232	0.000450253	0.000450253	3015455	0	0
1	3015460	3015461	peak	1.55415	+	73	0.0279158	0.0279158	3015460	0	0
1	3015464	3015465	peak	2.10986	+	119	0.00776493	0.00776493	3015464	0	0
1	3015468	3015469	peak	1.05451	+	38	0.0882036	0.0882036	3015468	0	0
1	3031227	3031228	peak	1.45393	+	64	0.0351618	0.0351618	3031227	0	0
1	3031232	3031233	peak	1.50843	+	68	0.0310148	0.0310148	3031232	0	0
1	3031241	3031242	peak	1.26998	+	51	0.053706	0.053706	3031241	0	0
1	3038381	3038382	peak	1.11782	-	41	0.0762389	0.0762389	3038381	0	0
1	3038386	3038387	peak	1.1492	-	43	0.0709243	0.0709243	3038386	0	0
1	3038387	3038388	peak	2.51512	-	151	0.00305405	0.00305405	3038387	0	0
1	3038390	3038391	peak	1.07042	-	38	0.0850309	0.0850309	3038390	0	0
1	3038407	3038408	peak	1.38418	-	59	0.0412872	0.0412872	3038407	0	0
1	3038413	3038414	peak	1.11836	-	41	0.0761449	0.0761449	3038413	0	0
1	3038428	3038429	peak	1.2109	-	47	0.0615323	0.0615323	3038428	0	0
1	3041980	3041981	peak	1.11874	+	41	0.0760778	0.0760778	3041980	0	0
1	3041997	3041998	peak	1.34228	+	56	0.045469	0.045469	3041997	0	0
1	3042022	3042023	peak	2.27532	+	130	0.00530494	0.00530494	3042022	0	0
1	3042028	3042029	peak	2.18107	+	122	0.00659063	0.00659063	3042028	0	0
1	3042037	3042038	peak	1.34101	+	56	0.0456026	0.0456026	3042037	0	0
1	3042040	3042041	peak	2.83593	+	180	0.00145905	0.00145905	3042040	0	0
1	3042042	3042043	peak	1.56016	+	72	0.0275319	0.0275319	3042042	0	0
1	3042045	3042046	peak	1.50671	+	68	0.0311379	0.0311379	3042045	0	0
1	3042052	3042053	peak	2.70243	+	168	0.00198415	0.00198415	3042052	0	0
1	3042055	3042056	peak	1.71574	+	84	0.0192426	0.0192426	3042055	0	0
1	3042068	3042069	peak	2.52099	+	152	0.00301311	0.00301311	3042068	0	0
1	3042089	3042090	peak	2.49622	+	150	0.0031899	0.0031899	3042089	0	0
1	3063396	3063397	peak	1.6931	-	82	0.0202722	0.0202722	3063396	0	0
1	3064097	3064098	peak	1.73178	+	85	0.0185448	0.0185448	3064097	0	0
1	3064111	3064112	peak	2.39108	+	140	0.00406368	0.00406368	3064111	0	0
1	3064116	3064117	peak	1.22553	+	48	0.0594934	0.0594934	3064116	0	0
1	3064160	3064161	peak	3.03208	+	198	0.000928801	0.000928801	3064160	0	0
1	3066752	3066753	peak	1.80166	+	157	0.0157886	0.0157886	3066752	0	0
1	3072040	3072041	peak	1.8282	-	93	0.0148524	0.0148524	3072040	0	0
1	3072047	3072048	peak	2.11	-	116	0.00776243	0.00776243	3072047	0	0
1	3072049	3072050	peak	4.05353	-	295	8.84026e-05	8.84026e-05	3072049	0	0
1	3072052	3072053	peak	1.14984	-	43	0.0708206	0.0708206	3072052	0	0
1	3093841	3093842	peak	1.05502	+	37	0.0881016	0.0881016	3093841	0	0
1	3093844	3093845	peak	3.9002	+	280	0.000125836	0.000125836	3093844	0	0
1	3093847	3093848	peak	1.13392	+	42	0.0734642	0.0734642	3093847	0	0
1	3100624	3100625	peak	1.31383	-	54	0.0485478	0.0485478	3100624	0	0
1	3102924	3102925	peak	1.41294	-	61	0.0386421	0.0386421	3102924	0	0
1	3104582	3104583	peak	3.54505	+	246	0.000285072	0.000285072	3104582	0	0
1	3104587	3104588	peak	2.05053	+	111	0.00890162	0.00890162	3104587	0	0
1	3106531	3106532	peak	14.7241	+	2112	1.88738e-15	1.88738e-15	3106531	0	0
1	3106533	3106534	peak	2.386	+	142	0.00411154	0.00411154	3106533	0	0
1	3106534	3106535	peak	inf	+	3506	0	0	3106534	0	0
1	3106537	3106538	peak	1.19265	+	49	0.0641729	0.0641729	3106537	0	0
1	3106539	3106540	peak	3.49093	+	261	0.0003229	0.0003229	3106539	0	0
1	3111754	3111755	peak	1.08713	+	39	0.0818228	0.0818228	3111754	0	0
1	3116656	3116657	peak	1.13058	-	42	0.0740327	0.0740327	3116656	0	0
1	3116689	3116690	peak	1.72957	-	85	0.0186393	0.0186393	3116689	0	0
1	3116698	3116699	peak	1.27025	-	51	0.0536723	0.0536723	3116698	0	0
1	3119588	3119589	peak	1.72544	-	85	0.0188172	0.0188172	3119588	0	0
1	3119611	3119612	peak	1.17989	-	45	0.0660868	0.0660868	3119611	0	0
1	3119922	3119923	peak	3.09383	+	204	0.00080569	0.00080569	3119922	0	0
1	3119925	3119926	peak	1.08514	+	39	0.082198	0.082198	3119925	0	0
1	3119933	3119934	peak	2.48223	+	150	0.00329438	0.00329438	3119933	0	0
1	3119963	3119964	peak	5.73725	+	474	1.83124e-06	1.83124e-06	3119963	0	0
1	3119966	3119967	peak	3.11164	+	210	0.000773316	0.000773316	3119966	0	0
1	3119968	3119969	peak	1.76588	+	90	0.0171442	0.0171442	3119968	0	0
1	3119973	3119974	peak	1.28054	+	53	0.0524154	0.0524154	3119973	0	0
1	3122975	3122976	peak	4.51585	+	340	3.04897e-05	3.04897e-05	3122975	0	0
1	3122982	3122983	peak	1.57535	+	73	0.0265859	0.0265859	3122982	0	0
1	3123007	3123008	peak	1.87849	+	97	0.0132286	0.0132286	3123007	0	0
1	3123026	3123027	peak	2.45127	+	146	0.00353778	0.00353778	3123026	0	0
1	3123031	3123032	peak	1.8488	+	95	0.0141645	0.0141645	3123031	0	0
1	3131027	3131028	peak	1.0692	-	38	0.0852712	0.0852712	3131027	0	0
1	3131061	3131062	peak	1.05495	-	37	0.0881159	0.0881159	3131061	0	0
1	3131064	3131065	peak	1.64135	-	78	0.0228374	0.0228374	3131064	0	0
1	3137447	3137448	peak	1.39022	-	72	0.040717	0.040717	3137447	0	0
1	3137459	3137460	peak	2.23849	-	144	0.00577445	0.00577445	3137459	0	0
1	3137464	3137465	peak	5.80493	-	508	1.56699e-06	1.56699e-06	3137464	0	0
1	3137467	3137468	peak	inf	-	5043	0	0	3137467	0	0
1	3137468	3137469	peak	9.14942	-	833	7.0889e-10	7.0889e-10	3137468	0	0
1	3137469	3137470	peak	inf	-	1668	0	0	3137469	0	0
1	3137470	3137471	peak	3.54646	-	248	0.000284145	0.000284145	3137470	0	0
1	3137471	3137472	peak	4.72515	-	363	1.88298e-05	1.88298e-05	3137471	0	0
1	3137472	3137473	peak	2.89937	-	186	0.00126074	0.00126074	3137472	0	0
1	3137475	3137476	peak	2.74867	-	172	0.00178372	0.00178372	3137475	0	0
1	3140235	3140236	peak	1.08602	-	39	0.0820312	0.0820312	3140235	0	0
1	3140887	3140888	peak	1.03859	+	36	0.0914969	0.0914969	3140887	0	0
1	3157503	3157504	peak	8.49163	+	749	3.22382e-09	3.22382e-09	3157503	0	0
1	3157511	3157512	peak	1.32347	+	55	0.0474821	0.0474821	3157511	0	0
1	3161654	3161655	peak	1.26635	-	51	0.0541569	0.0541569	3161654	0	0
1	3161656	3161657	peak	1.03583	-	36	0.0920813	0.0920813	3161656	0	0
1	3161658	3161659	peak	1.45088	-	64	0.0354099	0.0354099	3161658	0	0
1	3161665	3161666	peak	1.7789	-	89	0.0166378	0.0166378	3161665	0	0
1	3161686	3161687	peak	1.2992	-	53	0.0502112	0.0502112	3161686	0	0
1	3161691	3161692	peak	1.79435	-	90	0.0160563	0.0160563	3161691	0	0
1	3161707	3161708	peak	1.34277	-	56	0.0454177	0.0454177	3161707	0	0
1	3161840	3161841	peak	1.54866	+	71	0.028271	0.028271	3161840	0	0
1	3161855	3161856	peak	2.07341	+	113	0.00844489	0.00844489	3161855	0	0
1	3161860	3161861	peak	1.32626	+	55	0.0471778	0.0471778	3161860	0	0
1	3161867	3161868	peak	1.72778	+	85	0.0187162	0.0187162	3161867	0	0
1	3167857	3167858	peak	1.11752	-	41	0.0762927	0.0762927	3167857	0	0
1	3167868	3167869	peak	2.12277	-	117	0.00753755	0.00753755	3167868	0	0
1	3172117	3172118	peak	1.907	+	99	0.012388	0.012388	3172117	0	0
1	3172123	3172124	peak	1.18063	+	45	0.0659741	0.0659741	3172123	0	0
1	3173543	3173544	peak	1.48168	+	66	0.0329851	0.0329851	3173543	0	0
1	3173547	3173548	peak	3.94705	+	285	0.000112967	0.000112967	3173547	0	0
1	3173550	3173551	peak	1.10131	+	40	0.0791932	0.0791932	3173550	0	0
1	3173554	3173555	peak	1.35381	+	57	0.044278	0.044278	3173554	0	0
1	3173570	3173571	peak	1.85991	+	96	0.0138067	0.0138067	3173570	0	0
1	3189368	3189369	peak	1.60223	+	75	0.0249904	0.0249904	3189368	0	0
1	3189400	3189401	peak	1.8053	+	91	0.0156567	0.0156567	3189400	0	0
1	3189420	3189421	peak	1.50637	+	68	0.0311625	0.0311625	3189420	0	0
1	3189427	3189428	peak	1.4512	+	64	0.0353833	0.0353833	3189427	0	0
1	3195024	3195025	peak	1.07129	-	38	0.0848614	0.0848614	3195024	0	0
1	3200226	3200227	peak	1.45382	-	64	0.0351707	0.0351707	3200226	0	0
1	3201827	3201828	peak	2.07604	+	113	0.00839392	0.00839392	3201827	0	0
1	3201830	3201831	peak	1.31383	+	54	0.0485478	0.0485478	3201830	0	0
1	3205766	3205767	peak	1.56233	+	72	0.0273951	0.0273951	3205766	0	0
1	3226968	3226969	peak	1.5183	-	69	0.0303181	0.0303181	3226968	0	0
1	3226976	3226977	peak	1.54427	-	71	0.0285582	0.0285582	3226976	0	0
1	3227039	3227040	peak	1.42532	-	62	0.037556	0.037556	3227039	0	0
1	3227042	3227043	peak	2.84821	-	181	0.00141837	0.00141837	3227042	0	0
1	3227062	3227063	peak	1.68009	-	81	0.0208886	0.0208886	3227062	0	0
1	3227065	3227066	peak	1.89421	-	98	0.0127581	0.0127581	3227065	0	0
1	3239432	3239433	peak	1.50854	-	68	0.0310067	0.0310067	3239432	0	0
1	3252278	3252279	peak	1.13455	+	42	0.0733587	0.0733587	3252278	0	0
1	3271964	3271965	peak	2.0106	-	108	0.00975892	0.00975892	3271964	0	0
1	3272006	3272007	peak	1.58844	-	74	0.0257965	0.0257965	3272006	0	0
1	3273854	3273855	peak	1.11752	+	41	0.0762927	0.0762927	3273854	0	0
1	3273872	3273873	peak	1.1492	+	43	0.0709243	0.0709243	3273872	0	0
1	3273936	3273937	peak	1.25233	+	50	0.0559329	0.0559329	3273936	0	0
1	3284303	3284304	peak	1.05438	+	37	0.0882308	0.0882308	3284303	0	0
1	3284304	3284305	peak	5.21372	+	410	6.11333e-06	6.11333e-06	3284304	0	0
1	3284310	3284311	peak	8.98268	+	803	1.04068e-09	1.04068e-09	3284310	0	0
1	3284312	3284313	peak	1.75102	+	87	0.0177409	0.0177409	3284312	0	0
1	3284320	3284321	peak	1.26544	+	51	0.0542699	0.0542699	3284320	0	0
1	3288085	3288086	peak	9.30259	+	832	4.98205e-10	4.98205e-10	3288085	0	0
1	3288089	3288090	peak	8.02269	+	698	9.49098e-09	9.49098e-09	3288089	0	0
1	3288093	3288094	peak	4.42504	+	331	3.75804e-05	3.75804e-05	3288093	0	0
1	3288104	3288105	peak	5.61642	+	450	2.41871e-06	2.41871e-06	3288104	0	0
1	3288108	3288109	peak	1.44094	+	63	0.0362291	0.0362291	3288108	0	0
1	3288113	3288114	peak	1.18079	+	45	0.0659491	0.0659491	3288113	0	0
1	3288140	3288141	peak	1.38439	+	59	0.0412678	0.0412678	3288140	0	0
1	3288221	3288222	peak	1.75706	+	87	0.017496	0.017496	3288221	0	0
1	3288260	3288261	peak	1.17964	+	45	0.0661244	0.0661244	3288260	0	0
1	3297387	3297388	peak	1.11833	+	45	0.0761496	0.0761496	3297387	0	0
1	3297389	3297390	peak	1.56773	+	89	0.0270563	0.0270563	3297389	0	0
1	3297391	3297392	peak	1.50852	+	95	0.0310086	0.0310086	3297391	0	0
1	3297392	3297393	peak	2.08015	+	161	0.00831471	0.00831471	3297392	0	0
1	3297393	3297394	peak	1.14395	+	59	0.0717869	0.0717869	3297393	0	0
1	3297394	3297395	peak	2.39957	+	203	0.00398506	0.00398506	3297394	0	0
1	3306070	3306071	peak	1.5728	-	73	0.0267426	0.0267426	3306070	0	0
1	3323541	3323542	peak	1.71846	-	84	0.0191221	0.0191221	3323541	0	0
1	3323547	3323548	peak	2.52823	-	152	0.00296328	0.00296328	3323547	0	0
1	3323561	3323562	peak	3.52646	-	244	0.000297536	0.000297536	3323561	0	0
1	3323563	3323564	peak	1.58881	-	74	0.0257746	0.0257746	3323563	0	0
1	3325836	3325837	peak	1.1347	+	42	0.0733323	0.0733323	3325836	0	0
1	3325845	3325846	peak	1.13431	+	42	0.0733982	0.0733982	3325845	0	0
1	3341595	3341596	peak	1.35699	-	57	0.0439551	0.0439551	3341595	0	0
1	3347790	3347791	peak	1.21734	-	48	0.0606266	0.0606266	3347790	0	0
1	3347810	3347811	peak	3.22092	-	218	0.000601286	0.000601286	3347810	0	0
1	3347813	3347814	peak	1.69396	-	83	0.0202322	0.0202322	3347813	0	0
1	3347819	3347820	peak	2.94133	-	191	0.00114464	0.00114464	3347819	0	0
1	3347828	3347829	peak	1.14698	-	43	0.071288	0.071288	3347828	0	0
1	3347836	3347837	peak	1.84138	-	94	0.0144087	0.0144087	3347836	0	0
1	3347846	3347847	peak	1.92868	-	101	0.0117847	0.0117847	3347846	0	0
1	3347851	3347852	peak	6.16646	-	507	6.8162e-07	6.8162e-07	3347851	0	0
1	3347857	3347858	peak	5.56219	-	445	2.74035e-06	2.74035e-06	3347857	0	0
1	3347862	3347863	peak	1.3847	-	59	0.0412387	0.0412387	3347862	0	0
1	3347866	3347867	peak	1.41262	-	61	0.0386701	0.0386701	3347866	0	0
1	3347878	3347879	peak	1.67969	-	81	0.0209077	0.0209077	3347878	0	0
1	3347881	3347882	peak	1.10296	-	40	0.0788926	0.0788926	3347881	0	0
1	3347884	3347885	peak	2.49428	-	149	0.00320417	0.00320417	3347884	0	0
1	3349240	3349241	peak	1.15	+	43	0.0707946	0.0707946	3349240	0	0
1	3355570	3355571	peak	2.27631	+	130	0.00529287	0.00529287	3355570	0	0
1	3355588	3355589	peak	1.81619	+	92	0.0152691	0.0152691	3355588	0	0
1	3355593	3355594	peak	1.29602	+	53	0.0505807	0.0505807	3355593	0	0
1	3355595	3355596	peak	1.08374	+	39	0.0824625	0.0824625	3355595	0	0
1	3359837	3359838	peak	1.11905	-	41	0.0760241	0.0760241	3359837	0	0
1	3370560	3370561	peak	1.76702	+	88	0.0170993	0.0170993	3370560	0	0
1	3383905	3383906	peak	3.50062	-	242	0.00031578	0.00031578	3383905	0	0
1	3383910	3383911	peak	2.07463	-	113	0.00842108	0.00842108	3383910	0	0
1	3388390	3388391	peak	1.45415	-	64	0.0351442	0.0351442	3388390	0	0
1	3395048	3395049	peak	1.11882	-	41	0.0760644	0.0760644	3395048	0	0
1	3396820	3396821	peak	1.37777	-	59	0.0419017	0.0419017	3396820	0	0
1	3396832	3396833	peak	1.40812	-	61	0.0390735	0.0390735	3396832	0	0
1	3396850	3396851	peak	4.75412	-	365	1.76147e-05	1.76147e-05	3396850	0	0
1	3396857	3396858	peak	1.08632	-	39	0.0819756	0.0819756	3396857	0	0
1	3396868	3396869	peak	1.02181	-	35	0.0951019	0.0951019	3396868	0	0
1	3396878	3396879	peak	1.71846	-	84	0.0191221	0.0191221	3396878	0	0
1	3398330	3398331	peak	1.29182	-	53	0.0510718	0.0510718	3398330	0	0
1	3398351	3398352	peak	1.32568	-	55	0.0472406	0.0472406	3398351	0	0
1	3412831	3412832	peak	1.29929	-	53	0.0502004	0.0502004	3412831	0	0
1	3430601	3430602	peak	2.66238	-	164	0.0021758	0.0021758	3430601	0	0
1	3443836	3443837	peak	1.13314	-	42	0.0735963	0.0735963	3443836	0	0
1	3443846	3443847	peak	1.71778	-	84	0.0191522	0.0191522	3443846	0	0
1	3443884	3443885	peak	1.24103	-	49	0.0574082	0.0574082	3443884	0	0
1	3461367	3461368	peak	1.24169	-	50	0.0573203	0.0573203	3461367	0	0
1	3461384	3461385	peak	1.74307	-	87	0.0180689	0.0180689	3461384	0	0
1	3461387	3461388	peak	2.22592	-	127	0.00594402	0.00594402	3461387	0	0
1	3461392	3461393	peak	3.26225	-	221	0.000546705	0.000546705	3461392	0	0
1	3461396	3461397	peak	1.5419	-	71	0.0287141	0.0287141	3461396	0	0
1	3461400	3461401	peak	1.06733	-	38	0.0856392	0.0856392	3461400	0	0
1	3461402	3461403	peak	1.3796	-	59	0.0417256	0.0417256	3461402	0	0
1	3461405	3461406	peak	1.83674	-	94	0.0145633	0.0145633	3461405	0	0
1	3461416	3461417	peak	1.2668	-	51	0.0541005	0.0541005	3461416	0	0
1	3461419	3461420	peak	2.09279	-	115	0.00807625	0.00807625	3461419	0	0
1	3461438	3461439	peak	1.69973	-	83	0.019965	0.019965	3461438	0	0
1	3461442	3461443	peak	1.64865	-	79	0.0224569	0.0224569	3461442	0	0
1	3461466	3461467	peak	1.39662	-	60	0.0401215	0.0401215	3461466	0	0
1	3461480	3461481	peak	2.42474	-	143	0.00376059	0.00376059	3461480	0	0
1	3461484	3461485	peak	5.60168	-	449	2.5022e-06	2.5022e-06	3461484	0	0
1	3461638	3461639	peak	1.08705	+	39	0.0818367	0.0818367	3461638	0	0
1	3469972	3469973	peak	1.54735	+	71	0.0283562	0.0283562	3469972	0	0
1	3469985	3469986	peak	1.25296	+	50	0.0558525	0.0558525	3469985	0	0
1	3469992	3469993	peak	2.57546	+	157	0.00265789	0.00265789	3469992	0	0
1	3493736	3493737	peak	1.10289	-	40	0.0789063	0.0789063	3493736	0	0
1	3493739	3493740	peak	1.58869	-	74	0.0257819	0.0257819	3493739	0	0
1	3503404	3503405	peak	1.59774	-	78	0.0252499	0.0252499	3503404	0	0
1	3503423	3503424	peak	3.53522	-	252	0.000291592	0.000291592	3503423	0	0
1	3503425	3503426	peak	2.6671	-	169	0.00215227	0.00215227	3503425	0	0
1	3503429	3503430	peak	4.14792	-	310	7.11348e-05	7.11348e-05	3503429	0	0
1	3503431	3503432	peak	inf	-	1976	0	0	3503431	0	0
1	3503434	3503435	peak	3.07688	-	204	0.000837769	0.000837769	3503434	0	0
1	3503451	3503452	peak	8.88988	-	791	1.28862e-09	1.28862e-09	3503451	0	0
1	3503452	3503453	peak	1.1333	-	42	0.0735698	0.0735698	3503452	0	0
1	3503453	3503454	peak	2.72681	-	170	0.00187582	0.00187582	3503453	0	0
1	3503455	3503456	peak	1.1646	-	44	0.0684539	0.0684539	3503455	0	0
1	3503456	3503457	peak	1.28477	-	52	0.0519077	0.0519077	3503456	0	0
1	3503674	3503675	peak	1.35669	+	57	0.0439853	0.0439853	3503674	0	0
1	3503723	3503724	peak	1.80647	+	91	0.0156146	0.0156146	3503723	0	0
1	3503726	3503727	peak	2.58314	+	157	0.00261132	0.00261132	3503726	0	0
1	3503730	3503731	peak	1.65305	+	79	0.0222304	0.0222304	3503730	0	0
1	3514696	3514697	peak	2.93859	-	193	0.00115188	0.00115188	3514696	0	0
1	3514699	3514700	peak	2.386	-	142	0.00411154	0.00411154	3514699	0	0
1	3514702	3514703	peak	1.83771	-	95	0.0145309	0.0145309	3514702	0	0
[truncated: 45,986 more rows]
