# Supplementary material for: Nanopore direct RNA sequencing maps the complexity of Arabidopsis mRNA processing and m6A modification
Source: eLife. 2020 Jan 14;9:e49658. doi: 10.7554/eLife.49658 (PMC6959997; doi:10.7554/eLife.49658)
Supplement: Figure 5—figure supplement 1—source data 2. [file elife-49658-fig5-figsupp1-data2.xlsx]

## Sheet: LCMS
	Genotype	m6A:A ratio
0	Col-0	0.00877
1	Col-0	0.00926
2	Col-0	0.0097
15	vir-1	0.000956
16	vir-1	0.000976
17	vir-1	0.00101
18	VIR::VIR:GFP	0.005969
19	VIR::VIR:GFP	0.00623
20	VIR::VIR:GFP	0.00613
