# Supplementary material for: Nanopore direct RNA sequencing maps the complexity of Arabidopsis mRNA processing and m6A modification
Source: eLife. 2020 Jan 14;9:e49658. doi: 10.7554/eLife.49658 (PMC6959997; doi:10.7554/eLife.49658)
Supplement: Figure 5—source data 1. [file elife-49658-fig5-data1.tds]

#chrom	start	end	name	score	strand	log_odds	hetero_g_stat	neg_log10_hetero_p_val	neg_log10_hetero_fdr	homo_g_stat_a	homo_g_p_val_a	homo_g_stat_b	homo_g_p_val_b
1	31295	31296	DER_site	2	-	1.54	23.85	4.57	1.78	3.54	0.74	3.78	0.93
1	45417	45418	DER_site	13	-	2.21	81.91	16.92	13.35	15.03	0.09	10.29	0.33
1	45463	45464	DER_site	8	-	2.08	61.00	11.75	8.41	7.35	0.60	6.82	0.87
1	47576	47577	DER_site	11	-	1.97	75.01	14.70	11.23	7.10	0.31	12.45	0.41
1	47577	47578	DER_site	25	-	2.60	141.64	28.90	25.00	7.23	0.30	8.99	0.70
1	47578	47579	DER_site	16	-	2.42	93.46	19.40	15.75	8.86	0.18	10.50	0.31
1	47632	47633	DER_site	4	-	0.33	37.46	6.84	3.82	6.23	0.90	8.27	0.76
1	50138	50139	DER_site	23	-	1.81	134.33	27.34	23.47	12.88	0.38	7.32	0.84
1	50139	50140	DER_site	3	-	1.88	32.13	5.74	2.82	12.28	0.20	5.23	0.95
1	50140	50141	DER_site	2	-	2.01	28.49	5.00	2.16	10.24	0.59	9.15	0.69
1	50154	50155	DER_site	3	-	0.84	34.93	6.32	3.35	6.71	0.88	13.89	0.31
1	50188	50189	DER_site	2	-	0.97	26.06	4.51	1.73	7.63	0.81	9.98	0.62
1	50189	50190	DER_site	4	-	0.79	38.64	7.08	4.04	15.04	0.24	8.48	0.75
1	50190	50191	DER_site	73	-	2.00	369.57	77.98	73.37	20.18	0.06	6.47	0.89
1	50191	50192	DER_site	2	-	0.78	27.30	4.76	1.95	8.87	0.71	17.21	0.14
1	50238	50239	DER_site	4	-	1.34	40.03	7.37	4.31	25.40	0.01	12.74	0.39
1	50239	50240	DER_site	10	-	1.17	70.49	13.75	10.31	14.70	0.26	4.83	0.96
1	50240	50241	DER_site	230	-	3.36	1096.89	235.45	229.81	8.98	0.70	11.86	0.46
1	50241	50242	DER_site	73	-	2.47	367.43	77.52	72.92	20.01	0.07	4.26	0.98
1	50242	50243	DER_site	22	-	2.25	125.90	25.53	21.71	8.11	0.78	8.89	0.71
1	50243	50244	DER_site	12	-	1.49	76.50	15.02	11.53	7.47	0.59	13.92	0.31
1	50244	50245	DER_site	9	-	1.52	65.47	12.69	9.30	7.69	0.57	9.15	0.69
1	50245	50246	DER_site	8	-	1.35	61.16	11.78	8.44	9.96	0.62	12.87	0.38
1	50246	50247	DER_site	11	-	0.42	74.65	14.63	11.15	19.65	0.07	20.76	0.05
1	50248	50249	DER_site	67	-	1.95	339.36	71.46	66.92	47.92	0.00	37.96	0.00
1	50249	50250	DER_site	17	-	1.24	103.71	20.80	17.10	39.81	0.00	30.26	0.00
1	74041	74042	DER_site	2	+	3.38	24.69	5.36	2.48	3.15	0.79	1.71	0.94
1	115114	115115	DER_site	1	+	1.10	19.14	4.16	1.42	3.75	0.29	0.06	1.00
1	121172	121173	DER_site	3	-	1.68	31.43	6.16	3.20	12.88	0.04	4.50	0.88
1	121205	121206	DER_site	3	-	1.22	34.49	6.23	3.27	11.65	0.47	12.04	0.44
1	121207	121208	DER_site	21	-	2.83	122.33	24.77	20.96	17.49	0.13	6.30	0.90
1	121208	121209	DER_site	1	-	1.71	24.56	4.21	1.46	7.68	0.57	8.90	0.71
1	121210	121211	DER_site	2	-	0.16	28.44	4.99	2.15	14.13	0.12	4.91	0.96
1	121223	121224	DER_site	3	-	1.16	30.92	5.50	2.60	6.94	0.64	11.25	0.51
1	137998	137999	DER_site	3	+	3.03	22.37	5.65	2.74	0.63	0.89	0.21	0.98
1	180308	180309	DER_site	2	-	2.24	29.79	5.27	2.40	4.48	0.61	7.22	0.84
1	180324	180325	DER_site	2	-	2.35	27.66	5.37	2.49	0.24	0.97	5.07	0.83
1	180361	180362	DER_site	2	-	1.86	28.42	4.99	2.15	10.22	0.60	8.40	0.49
1	180362	180363	DER_site	8	-	1.83	59.42	11.42	8.10	9.48	0.66	15.23	0.23
1	189914	189915	DER_site	6	+	3.41	43.87	8.79	5.63	2.05	0.56	9.16	0.42
1	189920	189921	DER_site	2	+	2.34	18.20	4.70	1.89	0.99	0.80	2.71	0.44
1	189929	189930	DER_site	3	+	2.24	30.60	5.43	2.54	13.45	0.14	12.09	0.44
1	189931	189932	DER_site	3	+	2.23	30.64	5.99	3.05	9.90	0.36	3.21	0.96
1	189952	189953	DER_site	4	+	2.56	36.08	6.56	3.56	6.80	0.87	7.44	0.83
1	201676	201677	DER_site	24	+	2.63	133.95	28.12	24.23	7.71	0.56	6.85	0.65
1	201679	201680	DER_site	15	+	3.11	94.07	18.75	15.11	5.65	0.46	12.21	0.43
1	201719	201720	DER_site	2	+	1.24	26.40	5.10	2.25	4.07	0.67	4.24	0.89
1	221808	221809	DER_site	2	-	2.35	24.79	4.77	1.95	5.46	0.49	5.51	0.79
1	221815	221816	DER_site	5	-	2.88	43.18	8.02	4.91	3.56	0.74	4.94	0.96
1	225855	225856	DER_site	6	-	1.12	48.79	9.19	6.00	18.34	0.11	7.65	0.81
1	225873	225874	DER_site	2	-	-0.48	29.24	5.15	2.30	15.23	0.23	8.66	0.73
1	225882	225883	DER_site	72	-	2.41	362.77	76.51	71.93	13.67	0.32	11.64	0.47
1	225883	225884	DER_site	2	-	-0.23	28.60	5.03	2.18	12.22	0.43	9.93	0.62
1	225884	225885	DER_site	2	-	0.95	27.87	4.88	2.05	17.14	0.14	5.57	0.94
1	225906	225907	DER_site	20	-	1.42	118.09	23.86	20.08	9.81	0.37	10.66	0.56
1	225912	225913	DER_site	15	-	2.17	91.91	18.29	14.67	7.00	0.86	4.21	0.98
1	230751	230752	DER_site	6	+	2.05	50.77	9.60	6.38	6.45	0.69	9.31	0.68
1	233062	233063	DER_site	2	-	1.71	27.59	4.82	2.00	4.01	0.91	7.12	0.85
1	233063	233064	DER_site	2	-	2.37	29.25	5.16	2.30	8.88	0.45	5.45	0.94
1	266134	266135	DER_site	2	+	4.24	19.67	4.27	1.52	1.35	0.72	1.86	0.93
1	290972	290973	DER_site	3	+	2.62	27.90	5.42	2.53	3.30	0.77	3.63	0.93
1	290973	290974	DER_site	2	+	1.91	30.35	5.38	2.50	14.41	0.28	8.76	0.46
1	290979	290980	DER_site	5	+	3.04	39.91	7.95	4.85	3.66	0.30	5.58	0.78
1	290982	290983	DER_site	1	+	2.06	19.36	4.20	1.46	9.51	0.15	7.07	0.31
1	290996	290997	DER_site	6	+	2.04	44.46	8.92	5.74	4.73	0.86	7.19	0.62
1	290997	290998	DER_site	6	+	2.12	50.50	9.55	6.33	15.69	0.21	8.11	0.78
1	296085	296086	DER_site	17	-	3.87	102.90	20.62	16.94	7.02	0.64	5.37	0.94
1	296107	296108	DER_site	4	-	1.94	36.65	6.67	3.67	16.16	0.18	11.54	0.48
1	296108	296109	DER_site	3	-	2.30	35.45	6.43	3.44	7.51	0.58	6.71	0.88
1	313306	313307	DER_site	2	-	2.22	26.69	5.17	2.31	11.90	0.22	5.87	0.75
1	313330	313331	DER_site	6	-	5.38	44.19	9.60	6.38	1.66	0.65	3.97	0.68
1	313398	313399	DER_site	1	-	2.32	22.24	4.24	1.49	5.40	0.49	4.96	0.84
1	324845	324846	DER_site	2	+	2.35	20.54	4.46	1.68	9.49	0.15	1.24	0.97
1	330627	330628	DER_site	2	-	3.28	20.26	4.40	1.63	2.83	0.83	8.45	0.21
1	330628	330629	DER_site	5	-	3.98	44.33	8.26	5.13	6.16	0.41	10.94	0.53
1	330645	330646	DER_site	3	-	2.46	34.48	6.23	3.26	13.50	0.33	6.16	0.91
1	330686	330687	DER_site	6	-	4.33	48.07	9.04	5.86	4.90	0.84	8.59	0.74
1	386715	386716	DER_site	2	+	3.23	24.26	4.66	1.86	10.03	0.35	8.27	0.51
1	386760	386761	DER_site	4	+	1.21	40.02	7.37	4.31	10.66	0.56	6.20	0.91
1	387358	387359	DER_site	3	-	2.59	31.93	6.27	3.30	8.60	0.20	13.91	0.13
1	387380	387381	DER_site	3	-	2.54	30.71	5.46	2.56	6.48	0.37	9.02	0.44
1	387398	387399	DER_site	2	-	2.23	23.89	5.19	2.32	3.13	0.79	2.46	0.87
1	399859	399860	DER_site	2	+	2.38	22.98	4.39	1.62	3.60	0.73	8.18	0.52
1	403256	403257	DER_site	6	-	1.97	51.00	9.65	6.43	10.67	0.10	11.41	0.49
1	403258	403259	DER_site	2	-	1.42	28.84	5.07	2.22	9.64	0.38	4.64	0.97
1	403303	403304	DER_site	6	-	-1.45	47.74	8.97	5.79	9.89	0.36	11.51	0.49
1	403307	403308	DER_site	6	-	1.90	45.98	9.24	6.05	10.04	0.35	7.11	0.63
1	403308	403309	DER_site	9	-	2.04	62.25	12.71	9.32	8.01	0.24	3.12	0.96
1	403317	403318	DER_site	2	-	1.10	29.05	5.12	2.26	9.41	0.67	7.40	0.83
1	403323	403324	DER_site	10	-	2.61	70.10	13.66	10.23	6.05	0.42	4.51	0.97
1	403324	403325	DER_site	2	-	1.63	27.10	4.72	1.91	14.59	0.10	9.82	0.63
1	403345	403346	DER_site	7	-	1.75	55.07	10.50	7.23	14.13	0.29	9.87	0.63
1	403408	403409	DER_site	5	-	2.46	42.01	7.78	4.69	12.61	0.40	5.41	0.80
1	403409	403410	DER_site	3	-	2.63	30.76	5.47	2.57	5.06	0.54	15.43	0.22
1	410523	410524	DER_site	10	+	2.38	66.83	12.97	9.57	3.94	0.68	4.06	0.98
1	411484	411485	DER_site	4	+	2.04	40.63	7.49	4.42	8.21	0.22	12.66	0.18
1	448509	448510	DER_site	8	-	2.87	57.41	11.68	8.34	4.53	0.61	6.33	0.71
1	448526	448527	DER_site	5	-	2.83	37.08	8.05	4.94	5.98	0.43	3.83	0.70
1	458045	458046	DER_site	3	+	2.19	35.48	6.43	3.45	8.87	0.71	6.10	0.91
1	462120	462121	DER_site	3	-	2.80	30.86	5.49	2.59	10.46	0.58	9.82	0.63
1	513929	513930	DER_site	6	-	5.35	48.68	9.17	5.98	1.41	0.70	8.40	0.75
1	513992	513993	DER_site	2	-	1.81	26.87	5.20	2.34	6.94	0.33	3.57	0.73
1	520249	520250	DER_site	19	+	1.01	110.85	22.32	18.58	48.80	0.00	18.69	0.10
1	520250	520251	DER_site	6	+	1.38	51.12	9.68	6.45	15.03	0.24	10.39	0.58
1	520251	520252	DER_site	36	+	1.72	194.33	40.21	36.10	16.52	0.17	8.02	0.78
1	520252	520253	DER_site	47	+	2.50	247.92	51.74	47.46	19.50	0.08	23.31	0.03
1	520253	520254	DER_site	15	+	1.54	93.62	18.65	15.02	24.78	0.02	14.74	0.26
1	520268	520269	DER_site	3	+	0.75	35.40	6.41	3.43	14.91	0.25	9.55	0.66
1	520317	520318	DER_site	4	+	0.95	40.72	7.51	4.44	23.32	0.03	10.15	0.60
1	520318	520319	DER_site	65	+	1.97	332.42	69.96	65.44	31.77	0.00	19.39	0.08
1	520319	520320	DER_site	9	+	0.72	65.24	12.64	9.26	31.00	0.00	13.12	0.36
1	520355	520356	DER_site	2	+	2.75	23.38	4.47	1.69	5.22	0.52	3.63	0.93
1	520356	520357	DER_site	13	+	2.58	85.07	16.83	13.27	5.61	0.47	14.98	0.24
1	520357	520358	DER_site	3	+	0.72	33.08	5.94	3.00	13.68	0.32	8.18	0.77
1	520359	520360	DER_site	1	+	0.23	24.17	4.13	1.40	15.44	0.22	6.52	0.89
1	539860	539861	DER_site	2	+	1.43	24.85	4.27	1.51	4.66	0.86	7.37	0.83
1	539864	539865	DER_site	5	+	0.24	43.02	7.99	4.88	3.29	0.95	11.96	0.45
1	539920	539921	DER_site	15	+	1.79	91.84	19.06	15.41	6.22	0.72	8.51	0.48
1	539922	539923	DER_site	36	+	2.01	195.12	40.38	36.26	10.98	0.53	3.07	1.00
1	539923	539924	DER_site	3	+	1.48	31.61	5.64	2.73	4.79	0.85	12.48	0.41
1	539924	539925	DER_site	2	+	1.09	25.00	4.30	1.54	9.94	0.62	12.56	0.40
1	539925	539926	DER_site	4	+	1.07	37.46	6.84	3.82	7.42	0.83	14.71	0.26
1	539927	539928	DER_site	4	+	0.80	39.62	7.28	4.23	8.69	0.73	9.14	0.69
1	539938	539939	DER_site	8	+	0.68	59.54	11.44	8.12	13.14	0.36	14.16	0.29
1	539940	539941	DER_site	12	+	1.29	79.64	15.68	12.17	8.99	0.70	14.74	0.26
1	539941	539942	DER_site	5	+	1.15	45.23	8.45	5.31	16.17	0.18	4.37	0.98
1	539942	539943	DER_site	5	+	0.50	41.51	7.68	4.59	23.65	0.02	7.37	0.83
1	539944	539945	DER_site	9	+	1.27	62.02	11.96	8.61	14.25	0.11	8.83	0.72
1	539945	539946	DER_site	6	+	1.05	48.57	9.14	5.95	14.96	0.09	9.55	0.39
1	539946	539947	DER_site	3	+	0.41	30.69	5.45	2.56	9.09	0.70	8.48	0.75
1	539947	539948	DER_site	19	+	1.83	113.33	22.85	19.10	21.54	0.04	11.64	0.47
1	539948	539949	DER_site	21	+	2.37	123.27	24.97	21.16	13.50	0.33	6.71	0.88
1	539949	539950	DER_site	6	+	2.29	46.80	8.78	5.61	17.93	0.04	9.36	0.67
1	539950	539951	DER_site	30	+	1.60	164.72	33.85	29.84	20.71	0.05	6.24	0.90
1	539951	539952	DER_site	6	+	1.26	49.29	9.29	6.09	22.50	0.03	11.93	0.45
1	539952	539953	DER_site	10	+	1.01	66.94	13.72	10.28	7.26	0.61	7.63	0.57
1	539953	539954	DER_site	12	+	0.34	81.27	16.03	12.50	13.13	0.36	6.76	0.87
1	539985	539986	DER_site	6	+	2.27	49.71	9.38	6.18	5.74	0.45	7.86	0.80
1	539989	539990	DER_site	2	+	1.47	23.55	4.51	1.72	12.61	0.18	9.52	0.39
1	607939	607940	DER_site	2	-	1.31	25.97	4.49	1.71	9.35	0.41	5.20	0.95
1	607940	607941	DER_site	4	-	0.74	35.53	7.03	3.99	15.87	0.07	3.83	0.92
1	607943	607944	DER_site	34	-	1.71	182.51	37.67	33.59	7.07	0.85	10.57	0.57
1	607945	607946	DER_site	77	-	1.99	387.70	81.90	77.25	9.78	0.37	14.14	0.29
1	607946	607947	DER_site	3	-	0.66	31.89	5.70	2.78	7.15	0.85	4.95	0.96
1	607947	607948	DER_site	2	-	0.52	30.26	5.36	2.48	11.03	0.53	17.66	0.13
1	607968	607969	DER_site	55	-	2.79	283.93	59.50	55.10	11.52	0.49	13.79	0.31
1	607999	608000	DER_site	47	-	1.16	246.45	51.42	47.15	7.34	0.83	15.76	0.20
1	608000	608001	DER_site	21	-	0.92	120.54	24.39	20.59	6.30	0.90	10.74	0.55
1	608001	608002	DER_site	8	-	0.45	59.45	11.42	8.10	12.19	0.43	11.00	0.53
1	608004	608005	DER_site	40	-	1.01	212.58	44.13	39.97	12.30	0.42	11.10	0.52
1	608007	608008	DER_site	3	-	0.48	33.96	6.12	3.17	16.98	0.15	10.56	0.57
1	608018	608019	DER_site	10	-	-0.65	67.57	13.13	9.72	13.48	0.34	15.84	0.20
1	608021	608022	DER_site	3	-	0.26	35.52	6.44	3.46	7.16	0.62	7.01	0.86
1	608022	608023	DER_site	5	-	0.36	44.83	8.37	5.23	7.93	0.54	7.59	0.82
1	608023	608024	DER_site	28	-	1.31	156.29	32.04	28.07	8.63	0.73	15.67	0.21
1	608024	608025	DER_site	5	-	1.42	45.66	8.54	5.39	8.79	0.46	7.49	0.82
1	608025	608026	DER_site	14	-	1.83	87.29	17.31	13.72	10.68	0.56	9.90	0.62
1	629682	629683	DER_site	2	+	2.10	25.98	5.02	2.17	11.46	0.08	6.41	0.70
1	629683	629684	DER_site	11	+	2.55	71.56	13.97	10.53	9.19	0.69	6.48	0.89
1	629698	629699	DER_site	3	+	1.91	35.10	6.35	3.38	11.98	0.45	5.27	0.95
1	629713	629714	DER_site	3	+	1.80	35.19	6.37	3.39	5.56	0.94	9.51	0.66
1	629755	629756	DER_site	12	+	2.47	75.70	15.59	12.08	14.26	0.11	9.01	0.44
1	629762	629763	DER_site	5	+	2.41	41.31	8.25	5.12	4.37	0.63	5.95	0.74
1	633131	633132	DER_site	1	+	1.74	23.91	4.08	1.35	9.43	0.67	9.42	0.40
1	655679	655680	DER_site	3	-	1.84	28.82	5.61	2.71	3.85	0.70	9.72	0.37
1	655681	655682	DER_site	2	-	1.98	24.96	4.29	1.53	3.28	0.77	6.50	0.89
1	655703	655704	DER_site	7	-	2.25	48.92	9.87	6.63	5.38	0.80	8.92	0.44
1	655704	655705	DER_site	3	-	2.54	28.83	5.61	2.71	6.16	0.41	5.52	0.79
1	681556	681557	DER_site	2	-	3.12	28.27	4.96	2.12	12.00	0.45	9.87	0.63
1	704048	704049	DER_site	2	-	2.88	27.55	4.81	1.99	4.91	0.55	9.58	0.65
1	712628	712629	DER_site	2	-	4.25	27.14	5.26	2.39	2.14	0.54	2.77	0.97
1	753524	753525	DER_site	2	-	1.69	25.19	4.34	1.57	6.68	0.88	11.58	0.48
1	753545	753546	DER_site	4	-	0.77	40.68	7.50	4.43	13.61	0.33	6.05	0.91
1	754417	754418	DER_site	4	-	3.45	38.26	7.00	3.97	9.55	0.66	12.78	0.38
1	754419	754420	DER_site	1	-	0.91	23.97	4.09	1.36	7.48	0.82	7.92	0.79
1	758439	758440	DER_site	2	+	3.50	29.11	5.13	2.27	6.14	0.73	10.55	0.57
1	758440	758441	DER_site	1	+	3.73	21.30	4.04	1.32	2.42	0.88	5.93	0.75
1	766034	766035	DER_site	3	+	3.11	25.08	5.45	2.56	8.03	0.24	6.42	0.38
1	766046	766047	DER_site	2	+	2.94	25.40	4.90	2.07	9.84	0.36	3.37	0.76
1	793489	793490	DER_site	5	-	3.09	44.56	8.31	5.18	6.09	0.73	5.07	0.96
1	806880	806881	DER_site	6	+	3.26	47.07	9.47	6.26	2.61	0.86	11.35	0.25
1	806987	806988	DER_site	2	+	3.35	25.33	4.37	1.60	8.36	0.76	14.38	0.28
1	810707	810708	DER_site	1	+	3.26	18.68	4.06	1.33	6.73	0.08	3.35	0.76
1	810731	810732	DER_site	4	+	3.22	34.71	6.85	3.83	2.05	0.92	5.75	0.76
1	810764	810765	DER_site	2	+	3.47	24.99	4.30	1.54	7.03	0.32	4.91	0.84
1	810770	810771	DER_site	2	+	2.55	20.88	4.53	1.75	10.23	0.12	6.02	0.42
1	815122	815123	DER_site	2	+	3.42	25.98	5.02	2.17	6.49	0.69	6.99	0.64
1	818029	818030	DER_site	3	-	2.39	31.71	6.22	3.26	0.65	0.89	5.63	0.78
1	818055	818056	DER_site	3	-	2.62	34.26	6.18	3.22	8.74	0.46	7.30	0.61
1	840757	840758	DER_site	2	+	3.12	24.57	4.72	1.91	4.08	0.67	6.51	0.69
1	869065	869066	DER_site	1	-	1.40	23.71	4.04	1.32	6.59	0.88	3.65	0.93
1	869067	869068	DER_site	3	-	1.53	29.24	5.70	2.79	12.46	0.19	7.79	0.56
1	869078	869079	DER_site	6	-	1.56	46.37	9.32	6.12	11.49	0.24	2.64	0.85
1	869080	869081	DER_site	2	-	1.19	26.63	5.15	2.29	6.86	0.65	6.63	0.68
1	869081	869082	DER_site	5	-	1.68	40.51	8.08	4.97	4.75	0.86	7.27	0.61
1	869082	869083	DER_site	2	-	0.98	24.80	4.77	1.95	8.42	0.49	8.14	0.52
1	869109	869110	DER_site	9	-	1.55	62.85	12.14	8.78	5.57	0.78	8.23	0.77
1	869110	869111	DER_site	6	-	2.60	47.14	8.85	5.67	11.27	0.51	7.39	0.83
1	869111	869112	DER_site	2	-	2.34	26.12	4.52	1.74	12.39	0.41	11.52	0.48
1	869113	869114	DER_site	10	-	2.87	69.25	13.49	10.06	8.26	0.76	10.50	0.57
1	869114	869115	DER_site	5	-	2.72	41.34	7.64	4.56	9.84	0.36	6.48	0.89
1	869115	869116	DER_site	24	-	3.20	138.99	28.33	24.44	2.17	0.90	11.35	0.50
1	869116	869117	DER_site	4	-	2.29	36.43	6.63	3.63	9.64	0.38	8.62	0.73
1	869224	869225	DER_site	2	-	1.28	24.94	4.29	1.53	9.46	0.66	6.10	0.91
1	899574	899575	DER_site	3	+	0.57	31.88	5.69	2.78	16.11	0.19	6.70	0.88
1	899619	899620	DER_site	5	+	0.55	42.37	7.86	4.76	17.51	0.13	4.96	0.96
1	902867	902868	DER_site	1	+	2.07	21.49	4.08	1.35	4.78	0.85	7.07	0.63
1	909316	909317	DER_site	2	+	1.24	28.65	5.04	2.19	11.73	0.47	10.43	0.58
1	909317	909318	DER_site	2	+	1.47	28.75	5.06	2.21	11.36	0.25	11.22	0.51
1	909318	909319	DER_site	44	+	3.41	229.55	47.78	43.56	15.16	0.23	8.25	0.77
1	909320	909321	DER_site	21	+	3.26	121.78	24.65	20.85	7.27	0.30	9.54	0.66
1	909321	909322	DER_site	2	+	1.61	28.22	4.95	2.11	13.07	0.16	8.97	0.71
1	916904	916905	DER_site	6	-	1.45	45.97	9.24	6.04	9.02	0.44	14.93	0.09
1	916906	916907	DER_site	7	-	1.64	52.85	10.04	6.79	14.44	0.27	11.96	0.45
1	916908	916909	DER_site	133	-	3.56	646.01	137.77	132.68	11.84	0.46	12.27	0.42
1	916909	916910	DER_site	12	-	-0.99	78.29	15.40	11.89	28.09	0.01	16.72	0.16
1	916919	916920	DER_site	4	-	0.03	35.89	6.52	3.53	7.24	0.84	12.64	0.40
1	916920	916921	DER_site	9	-	-0.70	65.36	12.67	9.28	18.03	0.11	3.43	0.99
1	916945	916946	DER_site	14	-	0.94	90.67	18.02	14.42	6.62	0.88	8.70	0.73
1	916946	916947	DER_site	10	-	1.10	63.89	13.06	9.66	6.63	0.68	16.11	0.06
1	916947	916948	DER_site	17	-	1.34	103.37	20.72	17.03	11.69	0.47	8.34	0.76
1	916948	916949	DER_site	30	-	2.27	164.02	33.70	29.69	8.30	0.76	10.28	0.59
1	916949	916950	DER_site	28	-	2.15	155.26	31.82	27.85	7.64	0.81	7.17	0.85
1	916950	916951	DER_site	12	-	0.45	76.53	15.02	11.53	14.65	0.26	5.04	0.96
1	916951	916952	DER_site	4	-	-0.04	40.61	7.49	4.42	12.19	0.43	15.05	0.24
1	916952	916953	DER_site	8	-	0.18	58.36	11.19	7.89	18.85	0.09	16.45	0.17
1	916980	916981	DER_site	1	-	-0.55	24.08	4.11	1.38	9.82	0.63	4.00	0.98
1	916983	916984	DER_site	8	-	0.76	57.53	11.02	7.72	16.30	0.18	5.73	0.93
1	916984	916985	DER_site	5	-	0.82	44.42	8.28	5.15	11.37	0.25	19.24	0.08
1	916985	916986	DER_site	12	-	1.23	78.22	15.38	11.88	13.91	0.13	20.29	0.06
1	979355	979356	DER_site	2	-	2.11	24.16	5.25	2.38	10.18	0.12	1.75	0.94
1	979412	979413	DER_site	4	-	1.97	36.35	7.20	4.15	3.53	0.74	5.11	0.82
1	979449	979450	DER_site	2	-	3.27	20.22	4.39	1.62	4.58	0.60	0.37	0.95
1	979454	979455	DER_site	3	-	1.84	35.42	6.42	3.44	8.68	0.73	9.85	0.63
1	979468	979469	DER_site	3	-	1.38	34.73	6.28	3.31	12.10	0.21	6.63	0.88
1	979470	979471	DER_site	17	-	3.12	104.80	21.03	17.33	14.00	0.30	13.34	0.35
1	979498	979499	DER_site	2	-	1.75	28.72	5.05	2.20	5.22	0.81	13.56	0.33
1	993083	993084	DER_site	11	+	2.38	75.33	14.77	11.29	14.36	0.11	11.65	0.23
1	1000274	1000275	DER_site	3	+	3.06	29.92	5.84	2.91	7.65	0.57	5.63	0.47
1	1050704	1050705	DER_site	3	-	3.79	28.38	5.52	2.62	3.29	0.77	6.59	0.68
1	1056591	1056592	DER_site	2	+	1.84	29.36	5.18	2.32	7.68	0.81	5.72	0.93
1	1056631	1056632	DER_site	2	+	1.60	26.33	4.57	1.77	7.86	0.80	8.23	0.77
1	1056667	1056668	DER_site	2	+	1.96	23.18	4.43	1.66	11.23	0.26	5.13	0.82
1	1075587	1075588	DER_site	1	-	2.08	24.41	4.18	1.44	2.91	0.41	6.00	0.92
1	1075588	1075589	DER_site	2	-	2.05	27.28	4.76	1.94	12.99	0.16	5.74	0.93
1	1075625	1075626	DER_site	4	-	2.97	39.99	7.36	4.30	8.26	0.51	8.88	0.71
1	1075628	1075629	DER_site	8	-	3.30	56.09	11.40	8.08	4.48	0.61	8.12	0.52
1	1075652	1075653	DER_site	2	-	0.84	27.46	4.79	1.98	12.39	0.19	11.82	0.46
1	1075653	1075654	DER_site	7	-	2.33	52.29	9.92	6.68	3.05	0.80	8.55	0.74
1	1075717	1075718	DER_site	2	-	2.02	26.48	5.12	2.27	6.06	0.73	6.94	0.64
1	1075718	1075719	DER_site	3	-	2.01	28.39	5.52	2.62	2.33	0.89	5.76	0.76
1	1099748	1099749	DER_site	15	+	4.40	92.05	19.10	15.46	8.61	0.20	4.42	0.88
1	1099749	1099750	DER_site	5	+	2.19	39.42	7.85	4.75	3.92	0.69	4.81	0.85
1	1099754	1099755	DER_site	2	+	2.05	29.62	5.23	2.37	8.17	0.52	7.45	0.83
1	1099755	1099756	DER_site	5	+	3.42	43.03	8.62	5.46	7.13	0.31	4.37	0.89
1	1099756	1099757	DER_site	13	+	3.44	82.78	16.35	12.80	11.08	0.27	15.72	0.20
1	1099757	1099758	DER_site	5	+	0.75	39.81	7.93	4.83	7.25	0.30	12.82	0.17
1	1099770	1099771	DER_site	11	+	3.92	69.20	14.20	10.74	5.76	0.45	5.82	0.76
1	1099834	1099835	DER_site	2	+	1.92	23.53	4.50	1.72	7.80	0.55	6.29	0.71
1	1106568	1106569	DER_site	6	-	3.19	46.69	8.75	5.59	7.10	0.63	14.06	0.30
1	1106569	1106570	DER_site	5	-	2.93	41.14	7.60	4.52	6.28	0.90	3.99	0.98
1	1119633	1119634	DER_site	4	+	2.55	35.23	6.96	3.94	9.23	0.42	8.88	0.45
1	1138513	1138514	DER_site	3	+	3.00	33.14	5.95	3.01	4.05	0.67	8.20	0.77
1	1138532	1138533	DER_site	2	+	1.72	25.78	4.46	1.68	9.30	0.41	11.28	0.51
1	1138534	1138535	DER_site	3	+	1.79	32.70	5.86	2.93	8.32	0.50	11.27	0.51
1	1138536	1138537	DER_site	3	+	1.61	31.55	5.63	2.72	8.78	0.46	4.63	0.97
1	1141678	1141679	DER_site	45	-	3.33	238.56	49.72	45.47	5.21	0.52	12.15	0.43
1	1141679	1141680	DER_site	5	-	3.03	43.93	8.18	5.06	7.48	0.28	17.41	0.13
1	1141696	1141697	DER_site	3	-	0.83	30.94	5.50	2.61	10.40	0.58	9.88	0.36
1	1141697	1141698	DER_site	7	-	-1.07	54.48	10.38	7.12	22.83	0.01	10.69	0.56
1	1141700	1141701	DER_site	52	-	2.75	267.47	55.95	51.61	10.77	0.55	12.11	0.44
1	1141701	1141702	DER_site	83	-	3.18	416.69	88.16	83.47	12.76	0.39	19.68	0.07
1	1141702	1141703	DER_site	13	-	1.85	81.58	16.09	12.56	6.43	0.70	12.17	0.43
1	1141704	1141705	DER_site	6	-	1.27	47.38	8.90	5.72	8.90	0.45	9.54	0.66
1	1141705	1141706	DER_site	2	-	1.23	28.32	4.97	2.13	3.53	0.74	6.44	0.89
1	1141707	1141708	DER_site	2	-	-0.71	29.39	5.19	2.32	15.70	0.21	8.60	0.74
1	1141708	1141709	DER_site	3	-	-0.75	31.97	5.71	2.80	12.30	0.42	11.58	0.48
1	1141737	1141738	DER_site	5	-	0.76	44.65	8.33	5.19	17.63	0.13	6.42	0.89
1	1141738	1141739	DER_site	7	-	1.74	51.69	9.79	6.57	17.10	0.15	14.64	0.26
1	1141739	1141740	DER_site	2	-	0.63	29.83	5.28	2.40	18.48	0.03	11.06	0.52
1	1141740	1141741	DER_site	23	-	0.86	130.83	26.59	22.74	19.93	0.02	16.03	0.19
1	1141741	1141742	DER_site	21	-	1.60	124.61	25.26	21.44	4.68	0.86	11.11	0.52
1	1141742	1141743	DER_site	13	-	1.24	83.44	16.49	12.94	8.59	0.20	9.23	0.68
1	1141744	1141745	DER_site	2	-	0.58	25.87	4.47	1.69	11.69	0.47	10.21	0.60
1	1141756	1141757	DER_site	2	-	-0.60	25.70	4.44	1.66	8.02	0.78	12.34	0.42
1	1141758	1141759	DER_site	2	-	0.54	26.32	4.56	1.77	4.70	0.86	17.43	0.13
1	1141759	1141760	DER_site	15	-	1.34	92.42	18.39	14.77	16.92	0.05	15.13	0.23
1	1141760	1141761	DER_site	18	-	1.07	109.84	22.10	18.37	12.83	0.38	19.82	0.07
1	1141762	1141763	DER_site	5	-	0.66	42.75	7.93	4.83	18.11	0.03	14.36	0.28
1	1141763	1141764	DER_site	60	-	1.84	306.25	64.31	59.86	9.16	0.69	11.29	0.50
1	1141766	1141767	DER_site	12	-	1.10	80.84	15.94	12.41	18.95	0.09	28.91	0.00
1	1141787	1141788	DER_site	5	-	-0.64	42.39	7.86	4.76	20.60	0.06	12.38	0.42
1	1141790	1141791	DER_site	2	-	0.58	25.60	4.42	1.65	14.76	0.25	7.05	0.85
1	1141791	1141792	DER_site	30	-	2.28	164.15	33.72	29.72	8.42	0.75	4.56	0.97
1	1141805	1141806	DER_site	17	-	2.03	101.97	20.43	16.74	20.38	0.06	10.54	0.57
1	1141806	1141807	DER_site	5	-	1.74	45.19	8.44	5.30	14.53	0.27	19.93	0.07
1	1143624	1143625	DER_site	2	-	2.34	26.26	5.07	2.22	3.59	0.73	7.35	0.60
1	1143626	1143627	DER_site	7	-	2.60	50.96	10.30	7.04	3.23	0.78	2.43	0.88
1	1163168	1163169	DER_site	3	-	3.91	28.99	5.65	2.74	5.50	0.14	5.71	0.77
1	1163224	1163225	DER_site	3	-	2.89	32.52	5.82	2.90	13.91	0.31	6.89	0.65
1	1166542	1166543	DER_site	2	+	1.19	27.06	5.24	2.38	7.72	0.26	6.04	0.74
1	1166543	1166544	DER_site	5	+	1.79	38.52	7.66	4.58	3.96	0.68	9.75	0.37
1	1166544	1166545	DER_site	4	+	3.00	35.64	7.05	4.02	8.79	0.46	7.18	0.62
1	1166655	1166656	DER_site	2	+	3.41	25.42	4.90	2.07	4.29	0.64	9.31	0.41
1	1166674	1166675	DER_site	4	+	1.68	36.38	6.62	3.62	5.91	0.75	13.83	0.13
1	1185612	1185613	DER_site	5	-	1.73	41.54	7.68	4.60	1.99	0.58	6.30	0.90
1	1185614	1185615	DER_site	10	-	2.43	69.79	13.60	10.17	6.50	0.89	9.01	0.70
1	1185615	1185616	DER_site	9	-	2.54	63.36	12.24	8.88	8.05	0.53	6.93	0.86
1	1189202	1189203	DER_site	49	-	1.98	255.23	53.31	49.01	12.30	0.20	19.04	0.09
1	1189203	1189204	DER_site	10	-	-0.09	69.35	13.51	10.08	6.66	0.88	11.28	0.50
1	1189229	1189230	DER_site	5	-	1.28	45.12	8.43	5.29	18.34	0.11	14.97	0.24
1	1189230	1189231	DER_site	2	-	0.81	26.41	4.58	1.79	12.58	0.40	3.92	0.98
1	1189253	1189254	DER_site	40	-	2.33	211.46	43.89	39.73	15.39	0.22	10.51	0.57
1	1189259	1189260	DER_site	13	-	0.96	84.15	16.64	13.08	12.46	0.41	12.06	0.44
1	1189260	1189261	DER_site	33	-	1.69	181.37	37.42	33.35	10.97	0.28	19.84	0.07
1	1189261	1189262	DER_site	33	-	2.43	177.83	36.66	32.60	11.04	0.53	18.89	0.09
1	1189262	1189263	DER_site	10	-	1.44	68.33	13.29	9.88	7.88	0.79	14.36	0.28
1	1189306	1189307	DER_site	39	-	1.65	207.17	42.97	38.82	10.21	0.60	8.61	0.74
1	1189307	1189308	DER_site	3	-	0.82	29.36	5.73	2.81	11.22	0.26	4.26	0.89
1	1189316	1189317	DER_site	7	-	0.74	53.43	10.16	6.91	9.45	0.66	15.14	0.23
1	1189317	1189318	DER_site	36	-	1.29	195.93	40.55	36.44	9.29	0.68	9.19	0.69
1	1189318	1189319	DER_site	36	-	2.40	196.02	40.57	36.46	9.33	0.67	6.55	0.68
1	1189319	1189320	DER_site	69	-	2.53	349.06	73.55	69.00	9.30	0.68	8.80	0.72
1	1189320	1189321	DER_site	15	-	2.46	95.01	18.95	15.31	3.83	0.92	13.38	0.34
1	1189321	1189322	DER_site	71	-	3.16	358.45	75.58	71.01	6.56	0.89	9.69	0.64
1	1189322	1189323	DER_site	44	-	2.00	231.01	48.10	43.87	11.72	0.47	3.97	0.91
1	1189323	1189324	DER_site	5	-	-0.45	46.18	8.65	5.49	11.27	0.51	9.15	0.69
1	1189326	1189327	DER_site	15	-	1.61	92.64	18.44	14.82	12.08	0.44	3.37	0.99
1	1193799	1193800	DER_site	7	+	1.80	52.84	10.04	6.79	12.29	0.20	9.04	0.70
1	1193800	1193801	DER_site	2	+	1.92	26.26	4.55	1.76	9.94	0.62	5.24	0.95
1	1201388	1201389	DER_site	2	+	1.79	27.61	4.83	2.00	7.64	0.57	5.45	0.79
1	1201391	1201392	DER_site	6	+	1.92	49.02	9.24	6.04	4.12	0.90	11.17	0.51
1	1201393	1201394	DER_site	2	+	1.28	30.32	5.37	2.49	4.79	0.85	10.41	0.58
1	1201414	1201415	DER_site	3	+	2.22	33.16	5.96	3.02	10.95	0.53	4.71	0.86
1	1205746	1205747	DER_site	6	+	3.88	40.38	8.77	5.60	2.44	0.49	5.64	0.47
1	1205750	1205751	DER_site	2	+	2.94	26.81	5.19	2.33	5.10	0.16	6.91	0.65
1	1217291	1217292	DER_site	4	+	0.74	36.28	6.60	3.60	7.90	0.54	17.82	0.12
1	1217311	1217312	DER_site	4	+	1.24	37.40	6.83	3.81	12.85	0.17	17.62	0.13
1	1217313	1217314	DER_site	3	+	1.56	29.29	5.71	2.79	2.32	0.89	5.90	0.75
1	1217315	1217316	DER_site	5	+	0.60	45.62	8.53	5.38	26.22	0.00	10.11	0.61
1	1217326	1217327	DER_site	6	+	1.62	46.88	8.79	5.63	5.91	0.75	14.37	0.28
1	1217343	1217344	DER_site	2	+	1.92	26.59	4.62	1.82	7.46	0.28	9.14	0.69
1	1217344	1217345	DER_site	14	+	2.18	89.91	17.86	14.26	9.94	0.62	8.74	0.72
1	1217356	1217357	DER_site	11	+	1.32	71.98	14.06	10.61	12.55	0.40	12.21	0.43
1	1217358	1217359	DER_site	31	+	2.14	171.44	35.29	31.26	15.39	0.22	9.87	0.63
1	1217361	1217362	DER_site	3	+	0.80	33.54	6.03	3.09	10.06	0.61	8.78	0.72
1	1217382	1217383	DER_site	1	+	2.03	23.98	4.09	1.36	4.65	0.59	16.13	0.19
1	1217429	1217430	DER_site	2	+	3.14	26.19	5.06	2.21	1.67	0.64	8.18	0.52
1	1230661	1230662	DER_site	1	+	0.66	21.31	4.04	1.32	7.40	0.60	13.85	0.13
1	1230744	1230745	DER_site	1	+	2.28	21.55	4.09	1.36	4.98	0.17	4.80	0.85
1	1234307	1234308	DER_site	4	-	4.20	37.07	7.35	4.29	2.15	0.54	3.49	0.94
1	1242061	1242062	DER_site	6	+	3.28	41.56	9.02	5.84	3.77	0.71	4.34	0.63
1	1293228	1293229	DER_site	2	+	1.73	26.05	4.51	1.73	3.49	0.75	6.74	0.87
1	1293230	1293231	DER_site	3	+	2.17	31.88	6.26	3.29	6.39	0.38	6.56	0.68
1	1293231	1293232	DER_site	2	+	1.49	24.36	5.29	2.42	2.04	0.92	7.13	0.31
1	1293314	1293315	DER_site	4	+	3.38	36.84	7.30	4.25	8.07	0.23	4.13	0.90
1	1315483	1315484	DER_site	3	+	1.22	32.13	5.74	2.83	8.78	0.19	9.01	0.70
1	1315484	1315485	DER_site	5	+	2.30	36.21	7.86	4.77	3.67	0.72	0.61	1.00
1	1315521	1315522	DER_site	3	+	1.59	35.44	6.42	3.44	10.80	0.55	13.16	0.36
1	1315567	1315568	DER_site	3	+	-1.09	31.76	6.23	3.27	12.70	0.18	8.13	0.52
1	1315571	1315572	DER_site	2	+	1.21	27.60	4.82	2.00	11.91	0.45	11.03	0.53
1	1315572	1315573	DER_site	16	+	2.21	98.95	19.78	16.12	14.95	0.24	8.25	0.77
1	1315573	1315574	DER_site	30	+	2.93	166.16	34.16	30.14	8.86	0.18	9.12	0.69
1	1315578	1315579	DER_site	6	+	1.29	49.30	9.30	6.10	14.95	0.24	8.29	0.76
1	1315579	1315580	DER_site	26	+	3.25	147.23	30.10	26.16	16.75	0.05	6.07	0.91
1	1315581	1315582	DER_site	2	+	2.17	25.64	4.43	1.65	11.76	0.23	12.44	0.41
1	1315595	1315596	DER_site	7	+	2.44	52.03	10.53	7.26	3.94	0.27	5.96	0.74
1	1315596	1315597	DER_site	6	+	2.31	48.16	9.06	5.88	6.61	0.36	8.62	0.73
1	1315597	1315598	DER_site	26	+	3.04	140.61	29.55	25.63	3.31	0.77	7.28	0.61
1	1315636	1315637	DER_site	5	+	1.41	40.76	8.13	5.02	8.54	0.48	4.62	0.87
1	1315668	1315669	DER_site	1	+	1.19	23.85	4.07	1.34	7.70	0.81	10.50	0.57
1	1315729	1315730	DER_site	5	+	3.52	38.99	7.76	4.67	10.71	0.10	5.22	0.81
1	1331648	1331649	DER_site	3	-	2.72	31.78	6.23	3.27	3.87	0.69	4.99	0.83
1	1331741	1331742	DER_site	4	-	1.18	36.32	6.60	3.61	18.90	0.09	11.88	0.46
1	1331742	1331743	DER_site	2	-	1.29	28.42	4.99	2.15	9.20	0.69	3.71	0.93
1	1331757	1331758	DER_site	9	-	2.80	62.22	12.01	8.65	7.32	0.60	9.12	0.69
1	1331837	1331838	DER_site	3	-	1.44	35.13	6.36	3.38	5.80	0.76	14.68	0.26
1	1331839	1331840	DER_site	10	-	1.66	67.72	13.16	9.75	14.24	0.29	10.29	0.59
1	1340687	1340688	DER_site	4	-	4.17	39.64	7.29	4.24	9.87	0.36	7.07	0.85
1	1355302	1355303	DER_site	2	+	1.87	23.01	4.40	1.63	3.39	0.76	5.76	0.76
1	1355338	1355339	DER_site	4	+	2.59	40.47	7.46	4.39	6.09	0.73	6.05	0.91
1	1356307	1356308	DER_site	14	-	1.75	83.85	17.34	13.76	10.13	0.34	16.77	0.05
1	1356313	1356314	DER_site	26	-	1.60	140.38	29.50	25.58	13.45	0.14	19.66	0.02
1	1356314	1356315	DER_site	13	-	2.16	80.41	16.60	13.04	9.16	0.16	8.73	0.46
1	1356316	1356317	DER_site	5	-	1.01	41.58	7.69	4.60	22.36	0.03	7.83	0.80
1	1356345	1356346	DER_site	2	-	0.84	22.45	4.28	1.52	5.61	0.47	8.91	0.45
1	1356346	1356347	DER_site	9	-	1.09	60.38	12.31	8.94	10.71	0.30	7.01	0.64
1	1356347	1356348	DER_site	28	-	1.50	151.55	31.91	27.95	6.02	0.74	5.54	0.78
1	1356400	1356401	DER_site	3	-	-0.18	32.69	5.86	2.93	11.09	0.27	5.54	0.94
1	1356401	1356402	DER_site	4	-	-0.89	38.90	7.14	4.10	14.28	0.28	9.45	0.66
1	1356402	1356403	DER_site	6	-	0.93	46.38	8.69	5.53	10.37	0.58	10.55	0.31
1	1356403	1356404	DER_site	1	-	0.79	21.22	4.02	1.30	5.94	0.43	12.15	0.20
1	1356408	1356409	DER_site	4	-	0.54	37.39	6.83	3.81	18.86	0.03	12.22	0.43
1	1365146	1365147	DER_site	3	-	2.68	32.90	6.47	3.48	3.67	0.72	4.30	0.89
1	1365270	1365271	DER_site	6	-	3.01	50.41	9.53	6.31	9.66	0.38	10.65	0.56
1	1365288	1365289	DER_site	11	-	2.76	68.28	14.83	11.35	8.77	0.19	6.13	0.41
1	1369199	1369200	DER_site	2	-	2.80	23.04	4.40	1.63	10.22	0.33	7.71	0.56
1	1369200	1369201	DER_site	2	-	2.99	26.87	4.67	1.87	7.11	0.31	8.74	0.73
1	1373347	1373348	DER_site	10	-	6.20	58.66	13.73	10.29	1.69	0.64	1.13	0.77
1	1373370	1373371	DER_site	2	-	2.19	21.07	4.57	1.78	0.38	0.95	5.97	0.43
1	1400691	1400692	DER_site	3	+	1.61	34.10	6.15	3.19	13.55	0.33	14.60	0.26
1	1400692	1400693	DER_site	4	+	1.81	39.04	7.16	4.12	13.56	0.33	14.83	0.25
1	1413565	1413566	DER_site	6	+	3.72	46.58	8.73	5.57	2.25	0.52	6.65	0.88
1	1413576	1413577	DER_site	3	+	2.63	34.68	6.27	3.30	7.28	0.61	12.54	0.18
1	1416391	1416392	DER_site	2	-	2.36	27.62	4.83	2.00	8.52	0.48	3.33	0.95
1	1416445	1416446	DER_site	5	-	3.33	45.26	8.45	5.31	3.95	0.68	8.42	0.75
1	1451074	1451075	DER_site	3	-	2.52	30.97	5.51	2.61	7.74	0.56	10.37	0.58
1	1483968	1483969	DER_site	11	+	2.31	72.01	14.07	10.62	9.02	0.70	5.51	0.94
1	1483970	1483971	DER_site	17	+	2.85	101.08	20.24	16.56	11.45	0.49	13.45	0.34
1	1484026	1484027	DER_site	2	+	1.64	23.31	5.06	2.21	2.52	0.47	6.58	0.36
1	1484145	1484146	DER_site	5	-	3.51	41.92	7.76	4.67	7.96	0.24	11.53	0.48
1	1498280	1498281	DER_site	2	-	2.52	25.86	4.47	1.69	4.67	0.59	5.85	0.75
1	1498326	1498327	DER_site	2	-	2.29	25.26	4.87	2.04	9.35	0.41	2.96	0.97
1	1502390	1502391	DER_site	4	-	2.86	33.73	6.65	3.65	4.08	0.67	5.58	0.78
1	1502391	1502392	DER_site	12	-	1.81	75.79	15.61	12.10	17.43	0.04	5.20	0.82
1	1502412	1502413	DER_site	10	-	0.93	69.52	13.54	10.12	7.56	0.58	10.35	0.59
1	1502413	1502414	DER_site	30	-	1.84	167.80	34.51	30.49	8.52	0.74	16.43	0.17
1	1502414	1502415	DER_site	234	-	4.82	1117.56	239.93	234.26	17.30	0.04	3.71	0.99
1	1502415	1502416	DER_site	10	-	2.37	66.61	12.93	9.53	10.13	0.34	5.09	0.95
1	1502416	1502417	DER_site	6	-	1.77	50.69	9.59	6.37	10.65	0.30	5.47	0.94
1	1502425	1502426	DER_site	12	-	1.75	80.69	15.90	12.38	21.47	0.04	7.56	0.82
1	1502428	1502429	DER_site	4	-	1.59	38.46	7.05	4.01	13.97	0.30	17.77	0.12
1	1502431	1502432	DER_site	78	-	2.92	389.00	82.18	77.53	8.66	0.73	17.92	0.12
1	1502432	1502433	DER_site	5	-	0.70	43.49	8.09	4.97	7.02	0.86	7.22	0.84
1	1502434	1502435	DER_site	2	-	-0.49	28.31	4.97	2.13	13.53	0.33	7.25	0.84
1	1502446	1502447	DER_site	6	-	1.94	48.45	9.12	5.93	4.05	0.67	5.64	0.93
1	1502504	1502505	DER_site	1	-	0.02	21.75	4.13	1.40	7.29	0.61	7.66	0.57
1	1502508	1502509	DER_site	2	-	-0.81	26.37	4.57	1.78	6.94	0.64	4.67	0.86
1	1502509	1502510	DER_site	9	-	-1.18	62.07	11.97	8.62	12.75	0.39	7.52	0.82
1	1509085	1509086	DER_site	2	+	3.65	29.78	5.27	2.39	7.32	0.60	7.41	0.59
1	1509087	1509088	DER_site	4	+	2.87	32.99	6.49	3.50	9.50	0.39	7.38	0.60
1	1560782	1560783	DER_site	3	-	2.96	29.94	5.85	2.92	9.82	0.37	2.27	0.89
1	1560795	1560796	DER_site	2	-	4.11	24.03	5.22	2.35	4.05	0.26	1.85	0.93
1	1582555	1582556	DER_site	2	+	2.60	25.71	4.96	2.12	3.34	0.77	6.98	0.64
1	1594091	1594092	DER_site	2	-	2.28	26.20	5.06	2.21	3.71	0.72	7.68	0.57
1	1629051	1629052	DER_site	4	+	2.69	34.03	6.71	3.70	2.47	0.48	6.19	0.72
1	1629083	1629084	DER_site	5	+	3.13	42.77	8.56	5.41	11.26	0.26	12.06	0.21
1	1629117	1629118	DER_site	1	+	2.31	21.76	4.14	1.40	10.22	0.33	11.29	0.26
1	1629118	1629119	DER_site	7	+	2.10	51.65	9.79	6.56	9.46	0.40	13.99	0.30
1	1630942	1630943	DER_site	2	-	2.59	23.21	5.04	2.19	0.35	0.95	2.46	0.87
1	1631005	1631006	DER_site	6	-	2.74	46.85	8.79	5.62	8.00	0.24	5.66	0.93
1	1631006	1631007	DER_site	3	-	2.39	32.99	5.92	2.98	8.37	0.76	13.52	0.33
1	1717591	1717592	DER_site	1	-	1.24	22.18	4.22	1.47	9.85	0.13	7.37	0.60
1	1717594	1717595	DER_site	5	-	2.60	38.50	7.66	4.57	7.57	0.58	9.92	0.36
1	1747518	1747519	DER_site	5	+	2.60	42.10	8.42	5.28	3.38	0.76	5.48	0.48
1	1761728	1761729	DER_site	2	+	4.57	20.60	4.47	1.69	1.22	0.75	5.92	0.43
1	1766617	1766618	DER_site	7	-	0.98	55.38	10.57	7.29	16.87	0.15	24.90	0.02
1	1766619	1766620	DER_site	29	-	2.16	157.71	33.24	29.25	9.63	0.38	17.57	0.04
1	1766676	1766677	DER_site	39	-	1.53	210.22	43.62	39.46	15.31	0.22	12.56	0.40
1	1766677	1766678	DER_site	10	-	1.70	69.81	13.60	10.18	8.09	0.52	11.05	0.52
1	1766678	1766679	DER_site	3	-	1.39	31.68	5.65	2.74	16.33	0.18	8.71	0.73
1	1766703	1766704	DER_site	5	-	0.75	43.03	8.61	5.46	10.51	0.31	7.02	0.64
1	1766704	1766705	DER_site	19	-	1.15	107.87	22.50	18.76	11.33	0.25	5.86	0.75
1	1766705	1766706	DER_site	29	-	1.35	162.04	33.27	29.28	19.24	0.02	11.56	0.48
1	1766706	1766707	DER_site	15	-	1.11	94.77	18.89	15.26	24.54	0.00	12.29	0.42
1	1766707	1766708	DER_site	40	-	1.57	210.82	43.75	39.59	17.45	0.13	5.48	0.94
1	1766708	1766709	DER_site	16	-	1.52	100.56	20.13	16.45	11.47	0.49	11.58	0.48
1	1766709	1766710	DER_site	5	-	1.16	42.29	8.46	5.32	14.68	0.10	7.47	0.59
1	1766710	1766711	DER_site	35	-	1.86	186.95	38.62	34.53	11.00	0.53	20.14	0.06
1	1766711	1766712	DER_site	5	-	1.37	42.61	7.90	4.80	7.55	0.82	14.26	0.28
1	1766720	1766721	DER_site	10	-	1.09	68.55	13.34	9.92	9.92	0.62	15.26	0.23
1	1766721	1766722	DER_site	13	-	1.77	85.72	16.97	13.40	13.74	0.32	15.75	0.20
1	1766723	1766724	DER_site	9	-	1.17	64.33	12.45	9.07	24.80	0.02	12.16	0.20
1	1766726	1766727	DER_site	12	-	1.34	76.90	15.10	11.61	17.34	0.14	23.95	0.02
1	1766727	1766728	DER_site	3	-	-0.45	34.86	6.31	3.33	11.03	0.53	17.63	0.13
1	1766728	1766729	DER_site	4	-	0.51	39.42	7.24	4.19	11.00	0.53	9.70	0.64
1	1784327	1784328	DER_site	3	+	2.61	33.84	6.09	3.14	1.66	0.65	8.02	0.78
1	1784416	1784417	DER_site	2	+	3.09	23.86	4.57	1.78	3.68	0.72	7.03	0.63
1	1801224	1801225	DER_site	1	-	2.31	15.55	4.10	1.36	5.13	0.16	6.22	0.10
1	1801226	1801227	DER_site	5	-	2.62	39.04	7.77	4.68	10.83	0.29	11.95	0.22
1	1801249	1801250	DER_site	2	-	3.22	24.22	4.65	1.85	5.51	0.48	6.46	0.69
1	1801286	1801287	DER_site	3	-	2.43	34.24	6.18	3.22	3.71	0.72	3.74	0.99
1	1828611	1828612	DER_site	5	-	0.56	41.76	7.73	4.64	20.34	0.06	9.79	0.63
1	1828615	1828616	DER_site	19	-	2.39	111.77	22.52	18.77	12.89	0.17	15.45	0.22
1	1828635	1828636	DER_site	15	-	1.83	92.77	18.47	14.84	12.55	0.40	7.95	0.79
1	1834827	1834828	DER_site	2	+	2.44	29.64	5.24	2.37	10.54	0.57	16.01	0.07
1	1853133	1853134	DER_site	3	-	4.76	25.83	5.61	2.70	1.77	0.62	5.02	0.54
1	1857846	1857847	DER_site	2	-	2.29	22.97	4.39	1.62	7.69	0.57	4.75	0.86
1	1857951	1857952	DER_site	3	-	2.51	32.92	5.91	2.97	10.55	0.57	8.81	0.72
1	1892370	1892371	DER_site	5	-	1.59	45.34	8.47	5.33	14.91	0.25	7.06	0.85
1	1892402	1892403	DER_site	2	-	1.40	23.75	5.16	2.30	7.88	0.25	9.96	0.13
1	1894412	1894413	DER_site	2	-	2.37	26.39	5.10	2.25	7.58	0.06	4.19	0.90
1	1894457	1894458	DER_site	5	-	2.47	45.19	8.44	5.30	11.43	0.49	6.55	0.89
1	1894458	1894459	DER_site	2	-	2.31	22.47	4.28	1.53	10.02	0.12	7.30	0.61
1	1894493	1894494	DER_site	4	-	2.28	37.29	7.40	4.34	11.08	0.27	10.77	0.29
1	1894496	1894497	DER_site	2	-	1.81	26.57	5.14	2.28	4.65	0.59	8.41	0.49
1	1894546	1894547	DER_site	2	-	1.56	28.07	4.92	2.09	15.10	0.24	8.09	0.53
1	1904621	1904622	DER_site	3	+	1.95	31.88	5.69	2.78	10.04	0.35	10.83	0.54
1	1904679	1904680	DER_site	3	+	2.65	31.41	5.60	2.69	13.43	0.14	6.77	0.87
1	1904725	1904726	DER_site	2	+	1.58	28.18	4.94	2.11	5.06	0.96	4.21	0.90
1	1910624	1910625	DER_site	3	+	2.52	30.98	5.51	2.61	7.66	0.57	13.60	0.33
1	1910782	1910783	DER_site	1	+	1.90	22.16	4.22	1.47	11.86	0.22	7.48	0.59
1	1910789	1910790	DER_site	7	+	3.16	51.78	10.48	7.21	5.42	0.49	7.10	0.63
1	1926077	1926078	DER_site	1	+	2.11	21.52	4.09	1.36	6.18	0.72	4.12	0.66
1	1950671	1950672	DER_site	5	+	2.14	43.66	8.12	5.01	14.05	0.30	12.20	0.43
1	1950685	1950686	DER_site	9	+	2.48	65.32	12.66	9.27	14.88	0.25	10.58	0.57
1	1950689	1950690	DER_site	2	+	1.09	25.93	4.49	1.70	8.60	0.74	0.73	1.00
1	1950693	1950694	DER_site	3	+	1.82	26.85	5.83	2.90	4.10	0.66	4.80	0.57
1	1950712	1950713	DER_site	2	+	2.75	18.71	4.82	2.00	3.35	0.34	1.99	0.57
1	1950987	1950988	DER_site	1	-	2.30	23.81	4.06	1.33	11.67	0.47	9.37	0.67
1	1950989	1950990	DER_site	3	-	2.31	29.05	5.66	2.75	7.60	0.27	5.80	0.76
1	1951045	1951046	DER_site	2	-	3.60	25.53	4.41	1.63	3.86	0.70	9.53	0.66
1	1958614	1958615	DER_site	5	+	1.75	39.16	7.80	4.70	7.74	0.26	7.42	0.59
1	1958623	1958624	DER_site	3	+	1.71	32.48	5.82	2.89	11.62	0.48	6.41	0.89
1	1958628	1958629	DER_site	1	+	0.93	24.47	4.19	1.45	11.05	0.52	10.10	0.61
1	1960082	1960083	DER_site	3	-	2.59	29.58	6.42	3.44	5.70	0.46	2.88	0.82
1	1960083	1960084	DER_site	3	-	2.70	28.79	5.61	2.70	7.95	0.54	5.59	0.78
1	1960085	1960086	DER_site	2	-	3.71	22.38	4.26	1.51	3.71	0.72	10.27	0.33
1	1960087	1960088	DER_site	1	-	2.00	21.73	4.13	1.39	12.74	0.17	7.13	0.62
1	1960108	1960109	DER_site	3	-	1.36	32.26	5.77	2.85	10.42	0.32	7.61	0.82
1	1960109	1960110	DER_site	13	-	2.60	79.79	16.47	12.92	7.48	0.59	3.83	0.92
1	1960146	1960147	DER_site	1	-	0.87	24.05	4.11	1.37	9.82	0.63	7.11	0.85
1	1960147	1960148	DER_site	2	-	0.95	26.85	4.67	1.87	10.06	0.35	9.89	0.63
1	1960149	1960150	DER_site	4	-	1.39	35.86	7.10	4.06	5.51	0.48	6.69	0.67
1	1960172	1960173	DER_site	3	-	0.42	34.26	6.18	3.22	17.75	0.04	7.08	0.85
1	1960173	1960174	DER_site	4	-	1.14	37.49	6.85	3.83	15.61	0.21	9.18	0.69
1	1960176	1960177	DER_site	4	-	1.42	33.60	6.62	3.62	6.53	0.69	7.46	0.59
1	1960205	1960206	DER_site	4	-	1.11	38.90	7.14	4.10	4.74	0.86	14.08	0.30
1	1967129	1967130	DER_site	27	-	3.33	147.60	31.06	27.11	5.22	0.52	2.40	0.88
1	1990731	1990732	DER_site	4	-	3.31	36.96	7.33	4.27	7.03	0.07	9.69	0.38
1	1990733	1990734	DER_site	2	-	2.09	23.56	4.51	1.73	1.26	0.97	4.52	0.87
1	1990796	1990797	DER_site	10	-	3.71	69.54	13.55	10.12	10.48	0.57	10.19	0.60
1	2003727	2003728	DER_site	2	-	2.96	23.79	4.56	1.77	1.37	0.71	5.72	0.77
1	2033912	2033913	DER_site	4	+	2.15	32.56	7.07	4.03	7.20	0.30	3.60	0.73
1	2037218	2037219	DER_site	1	+	1.94	24.17	4.13	1.40	5.55	0.78	12.63	0.40
1	2037315	2037316	DER_site	3	+	3.34	29.13	5.68	2.76	6.66	0.35	4.92	0.84
1	2037316	2037317	DER_site	2	+	3.66	24.23	4.65	1.85	5.77	0.45	6.99	0.64
1	2037317	2037318	DER_site	2	+	3.30	25.25	4.86	2.04	4.87	0.56	4.44	0.62
1	2047485	2047486	DER_site	9	+	4.91	59.30	12.08	8.72	7.18	0.30	10.09	0.34
1	2047486	2047487	DER_site	2	+	2.87	20.19	4.38	1.61	4.57	0.21	7.88	0.25
1	2049170	2049171	DER_site	23	+	-0.34	133.29	27.11	23.25	31.18	0.00	44.31	0.00
1	2049256	2049257	DER_site	133	+	1.44	649.62	138.55	133.46	20.53	0.06	32.43	0.00
1	2049258	2049259	DER_site	5	+	0.09	42.73	7.93	4.83	17.43	0.13	12.38	0.42
1	2049260	2049261	DER_site	9	+	0.70	63.12	12.19	8.83	18.55	0.10	37.50	0.00
1	2049270	2049271	DER_site	8	+	0.46	60.60	11.66	8.33	25.78	0.01	15.70	0.21
1	2049272	2049273	DER_site	59	+	0.75	303.51	63.72	59.28	80.38	0.00	28.44	0.00
1	2049324	2049325	DER_site	134	+	1.33	653.78	139.45	134.35	5.90	0.92	7.50	0.82
1	2049325	2049326	DER_site	11	+	1.32	71.54	13.97	10.52	11.78	0.46	13.87	0.31
1	2049326	2049327	DER_site	92	+	2.25	456.76	96.82	92.07	15.67	0.21	14.70	0.26
1	2049328	2049329	DER_site	11	+	0.79	72.78	14.23	10.78	8.65	0.73	9.18	0.69
1	2051874	2051875	DER_site	1	-	-5.07	18.58	4.03	1.31	13.49	0.04	0.00	1.00
1	2052635	2052636	DER_site	2	-	2.08	24.63	4.73	1.92	5.59	0.78	1.12	0.98
1	2052638	2052639	DER_site	2	-	0.54	24.69	5.36	2.48	7.09	0.31	1.69	0.95
1	2052650	2052651	DER_site	4	-	2.15	33.96	6.69	3.69	5.39	0.49	8.48	0.49
1	2052652	2052653	DER_site	3	-	1.74	30.62	5.99	3.05	5.52	0.79	8.16	0.52
1	2052653	2052654	DER_site	10	-	2.52	69.40	13.52	10.09	2.86	0.83	8.70	0.73
1	2052707	2052708	DER_site	2	-	2.50	24.81	4.26	1.51	7.00	0.32	5.18	0.82
1	2093073	2093074	DER_site	3	-	3.46	31.69	6.21	3.25	1.78	0.62	2.97	0.97
1	2110881	2110882	DER_site	2	+	3.36	26.59	5.14	2.29	2.41	0.88	2.05	0.99
1	2111437	2111438	DER_site	2	-	2.85	23.98	4.60	1.80	10.19	0.12	6.38	0.70
1	2130222	2130223	DER_site	7	-	1.92	51.75	9.81	6.58	10.93	0.28	6.42	0.89
1	2130223	2130224	DER_site	3	-	2.41	34.15	6.16	3.20	8.07	0.53	5.70	0.93
1	2130245	2130246	DER_site	2	-	1.77	24.80	4.77	1.95	10.26	0.33	13.47	0.14
1	2158459	2158460	DER_site	5	-	3.28	38.34	7.62	4.54	6.32	0.39	10.04	0.12
1	2161122	2161123	DER_site	2	-	5.22	18.02	4.66	1.86	0.00	1.00	2.51	0.47
1	2171888	2171889	DER_site	3	+	1.05	30.63	5.44	2.55	11.82	0.22	14.25	0.29
1	2171890	2171891	DER_site	3	+	1.09	35.08	6.35	3.38	15.47	0.22	10.39	0.58
1	2171891	2171892	DER_site	7	+	1.90	56.13	10.73	7.44	5.76	0.76	11.91	0.45
1	2171892	2171893	DER_site	3	+	1.14	33.69	6.06	3.12	19.93	0.07	6.83	0.87
1	2171893	2171894	DER_site	9	+	1.34	63.01	12.17	8.81	17.31	0.01	8.47	0.75
1	2171894	2171895	DER_site	3	+	1.13	31.42	5.60	2.70	6.31	0.71	7.46	0.83
1	2171895	2171896	DER_site	5	+	1.51	39.01	7.76	4.67	13.49	0.14	7.36	0.60
1	2171915	2171916	DER_site	25	+	2.55	139.44	28.43	24.54	4.71	0.86	8.11	0.78
1	2171917	2171918	DER_site	2	+	0.73	27.21	4.74	1.93	9.83	0.63	15.98	0.19
1	2171996	2171997	DER_site	21	+	3.69	119.39	24.98	21.17	2.86	0.83	15.59	0.08
1	2171998	2171999	DER_site	3	+	-1.01	33.65	6.06	3.11	5.30	0.81	10.13	0.60
1	2172009	2172010	DER_site	3	+	1.32	35.34	6.40	3.42	14.80	0.25	8.37	0.50
1	2172010	2172011	DER_site	3	+	1.50	35.11	6.36	3.38	7.16	0.62	7.51	0.82
1	2172014	2172015	DER_site	4	+	1.91	35.73	7.07	4.03	2.71	0.84	3.91	0.92
1	2178181	2178182	DER_site	3	-	2.32	33.17	5.96	3.02	12.61	0.18	9.59	0.65
1	2178186	2178187	DER_site	2	-	1.43	29.49	5.21	2.34	9.70	0.38	12.11	0.44
1	2178328	2178329	DER_site	1	-	1.87	21.44	4.07	1.34	10.71	0.30	8.40	0.49
1	2192012	2192013	DER_site	16	-	2.73	97.62	19.50	15.85	7.68	0.81	15.08	0.24
1	2192061	2192062	DER_site	4	-	1.37	37.54	6.86	3.84	9.73	0.64	5.65	0.77
1	2192093	2192094	DER_site	2	-	0.90	28.26	4.96	2.12	12.81	0.17	9.04	0.70
1	2192095	2192096	DER_site	2	-	0.87	24.76	4.76	1.95	2.23	0.99	6.77	0.66
1	2192136	2192137	DER_site	6	-	1.70	50.26	9.50	6.29	13.60	0.33	4.84	0.96
1	2192138	2192139	DER_site	4	-	0.69	33.29	6.55	3.56	8.32	0.22	4.10	0.90
1	2201007	2201008	DER_site	3	+	2.04	28.73	5.59	2.69	9.19	0.42	8.29	0.50
1	2201008	2201009	DER_site	2	+	2.62	25.44	4.90	2.07	6.21	0.72	5.62	0.78
1	2201124	2201125	DER_site	1	+	3.51	18.88	4.10	1.37	2.77	0.43	3.09	0.80
1	2201126	2201127	DER_site	2	+	2.82	25.98	5.02	2.17	10.03	0.12	7.74	0.56
1	2206834	2206835	DER_site	3	+	1.68	31.53	5.62	2.71	5.57	0.78	7.85	0.80
1	2206835	2206836	DER_site	18	+	3.73	108.02	21.72	18.00	6.52	0.69	12.80	0.38
1	2206837	2206838	DER_site	1	+	3.18	24.05	4.11	1.38	4.29	0.64	10.14	0.60
1	2206838	2206839	DER_site	28	+	3.93	157.22	32.24	28.26	11.32	0.50	20.09	0.07
1	2206875	2206876	DER_site	2	+	1.87	25.16	4.33	1.57	5.25	0.51	8.05	0.78
1	2216887	2216888	DER_site	12	+	3.65	69.17	15.02	11.53	4.07	0.25	7.97	0.24
1	2220486	2220487	DER_site	6	-	3.33	47.51	9.57	6.35	10.75	0.29	5.80	0.45
1	2241046	2241047	DER_site	3	+	1.78	31.36	6.15	3.19	19.07	0.02	6.97	0.64
1	2241085	2241086	DER_site	2	+	1.52	26.47	4.59	1.80	17.24	0.14	8.52	0.48
1	2241086	2241087	DER_site	7	+	2.63	55.09	10.51	7.24	15.96	0.19	10.76	0.55
1	2241087	2241088	DER_site	7	+	2.65	52.61	9.99	6.75	7.67	0.57	12.13	0.21
1	2250321	2250322	DER_site	3	+	1.06	35.11	6.36	3.38	6.95	0.64	6.08	0.91
1	2250322	2250323	DER_site	6	+	0.94	48.39	9.11	5.92	8.00	0.53	12.11	0.44
1	2250323	2250324	DER_site	4	+	0.94	36.49	7.23	4.18	15.27	0.08	10.70	0.30
1	2250324	2250325	DER_site	5	+	1.63	42.39	8.48	5.33	13.38	0.04	8.94	0.44
1	2250325	2250326	DER_site	6	+	1.52	49.58	9.36	6.15	21.46	0.04	23.06	0.03
1	2250348	2250349	DER_site	2	+	0.95	27.58	4.82	2.00	14.46	0.11	11.88	0.46
1	2250384	2250385	DER_site	3	+	0.52	28.12	5.47	2.57	20.55	0.01	4.78	0.85
1	2250474	2250475	DER_site	3	+	2.82	34.52	6.24	3.27	4.03	0.26	7.39	0.83
1	2280189	2280190	DER_site	2	+	1.91	20.40	4.43	1.66	1.76	0.62	6.59	0.36
1	2280202	2280203	DER_site	2	+	3.28	26.97	5.22	2.36	2.01	0.57	5.90	0.75
1	2286348	2286349	DER_site	4	-	3.52	36.52	7.24	4.19	6.01	0.42	4.14	0.90
1	2294426	2294427	DER_site	2	+	2.75	27.64	5.36	2.48	8.36	0.50	5.50	0.79
1	2294447	2294448	DER_site	4	+	2.74	37.43	7.43	4.36	10.77	0.29	6.48	0.69
1	2294449	2294450	DER_site	1	+	1.97	21.79	4.14	1.40	8.04	0.53	6.43	0.70
1	2338662	2338663	DER_site	3	-	1.25	30.95	5.50	2.61	15.43	0.22	5.82	0.76
1	2338663	2338664	DER_site	2	-	1.58	25.93	4.48	1.70	12.74	0.17	6.03	0.91
1	2338672	2338673	DER_site	10	-	1.81	70.15	13.68	10.24	16.75	0.16	5.86	0.92
1	2338673	2338674	DER_site	4	-	2.67	39.09	7.17	4.13	6.63	0.36	7.95	0.79
1	2338678	2338679	DER_site	16	-	0.92	96.86	19.34	15.69	15.56	0.21	10.44	0.58
1	2359828	2359829	DER_site	4	-	3.50	32.91	7.15	4.10	3.89	0.27	1.94	0.93
1	2359830	2359831	DER_site	3	-	2.73	25.30	5.49	2.60	7.11	0.31	3.12	0.37
1	2370276	2370277	DER_site	6	-	2.88	44.52	8.93	5.76	6.83	0.34	4.35	0.89
1	2381243	2381244	DER_site	7	+	2.69	54.21	10.32	7.06	21.93	0.01	6.97	0.86
1	2381244	2381245	DER_site	13	+	3.41	82.09	16.96	13.39	8.27	0.22	2.61	0.98
1	2408256	2408257	DER_site	3	-	1.86	34.47	6.22	3.26	9.05	0.70	2.49	0.98
1	2408283	2408284	DER_site	3	-	0.78	33.31	5.99	3.04	12.60	0.40	3.50	0.99
1	2408298	2408299	DER_site	32	-	1.68	175.24	36.11	32.06	5.43	0.94	10.10	0.61
1	2408305	2408306	DER_site	4	-	-0.72	36.83	6.71	3.70	18.10	0.11	6.87	0.87
1	2408306	2408307	DER_site	5	-	0.76	45.71	8.55	5.40	14.53	0.27	16.64	0.16
1	2408307	2408308	DER_site	3	-	0.74	34.38	6.21	3.24	7.47	0.59	10.32	0.59
1	2408309	2408310	DER_site	5	-	0.73	44.52	8.30	5.17	7.49	0.82	9.36	0.67
1	2408317	2408318	DER_site	17	-	0.94	104.63	20.99	17.29	43.24	0.00	24.40	0.02
1	2408318	2408319	DER_site	13	-	1.27	85.74	16.98	13.41	6.67	0.67	16.85	0.16
1	2408319	2408320	DER_site	29	-	1.70	160.32	32.90	28.92	11.12	0.52	10.41	0.32
1	2408329	2408330	DER_site	3	-	-0.40	30.98	5.51	2.61	11.33	0.50	15.67	0.21
1	2408330	2408331	DER_site	3	-	-0.51	30.90	5.49	2.60	4.22	0.98	6.70	0.88
1	2408331	2408332	DER_site	2	-	-0.47	26.40	4.58	1.79	5.48	0.94	9.93	0.62
1	2408338	2408339	DER_site	2	-	0.57	24.33	4.67	1.87	7.23	0.61	5.65	0.77
1	2408339	2408340	DER_site	6	-	0.50	44.02	8.83	5.66	19.73	0.02	14.05	0.12
1	2408340	2408341	DER_site	16	-	1.07	100.60	20.13	16.46	6.21	0.72	9.60	0.65
1	2408341	2408342	DER_site	4	-	0.85	40.44	7.46	4.39	4.94	0.84	8.00	0.79
1	2408342	2408343	DER_site	100	-	2.08	491.68	104.37	99.56	6.61	0.88	13.43	0.34
1	2408346	2408347	DER_site	2	-	0.49	30.13	5.34	2.46	4.78	0.85	5.27	0.95
1	2408362	2408363	DER_site	3	-	-0.52	32.66	5.85	2.92	10.03	0.61	12.25	0.43
1	2408365	2408366	DER_site	3	-	1.46	34.32	6.19	3.23	11.59	0.48	8.78	0.46
1	2408366	2408367	DER_site	6	-	1.17	44.29	8.88	5.71	10.87	0.28	9.02	0.44
1	2408367	2408368	DER_site	7	-	1.40	50.76	10.26	7.00	11.46	0.25	10.25	0.33
1	2408368	2408369	DER_site	7	-	1.56	50.01	10.10	6.85	11.03	0.27	6.80	0.66
1	2408369	2408370	DER_site	3	-	0.08	28.85	5.62	2.71	14.42	0.11	6.84	0.65
1	2408387	2408388	DER_site	43	-	4.40	224.81	46.76	42.56	17.75	0.12	12.41	0.41
1	2408388	2408389	DER_site	3	-	2.40	29.81	5.82	2.89	5.16	0.16	8.28	0.51
1	2408390	2408391	DER_site	5	-	1.45	39.61	7.89	4.79	1.57	0.95	2.52	0.98
1	2408391	2408392	DER_site	2	-	-0.42	25.54	4.41	1.64	17.24	0.14	6.43	0.89
1	2408392	2408393	DER_site	12	-	0.89	77.03	15.13	11.64	27.22	0.01	8.58	0.74
1	2408395	2408396	DER_site	10	-	-0.57	66.20	13.56	10.13	8.97	0.44	8.27	0.51
1	2423602	2423603	DER_site	3	+	2.91	31.17	5.55	2.65	13.60	0.33	9.00	0.70
1	2439555	2439556	DER_site	4	+	0.77	38.27	7.01	3.98	9.19	0.69	14.25	0.29
1	2439556	2439557	DER_site	6	+	0.92	48.90	9.21	6.02	21.04	0.05	5.55	0.94
1	2439558	2439559	DER_site	5	+	1.89	45.18	8.44	5.30	10.00	0.62	3.94	0.98
1	2439559	2439560	DER_site	11	+	2.36	73.16	14.31	10.85	11.78	0.46	8.30	0.76
1	2439560	2439561	DER_site	55	+	1.61	285.07	59.75	55.34	11.01	0.53	14.34	0.28
1	2439596	2439597	DER_site	9	+	1.47	63.28	12.23	8.86	12.32	0.20	6.05	0.91
1	2439598	2439599	DER_site	1	+	0.94	21.31	4.04	1.32	13.48	0.14	4.28	0.64
1	2439622	2439623	DER_site	2	+	0.50	25.39	4.38	1.61	9.77	0.37	10.82	0.54
1	2439623	2439624	DER_site	7	+	0.77	52.28	9.92	6.68	9.29	0.68	7.90	0.79
1	2439624	2439625	DER_site	3	+	2.27	32.04	5.73	2.81	4.39	0.98	5.75	0.93
1	2439625	2439626	DER_site	40	+	2.23	213.31	44.29	40.12	9.28	0.68	10.13	0.60
1	2439626	2439627	DER_site	7	+	0.99	52.72	10.01	6.77	11.85	0.46	14.16	0.29
1	2439627	2439628	DER_site	20	+	1.10	112.70	23.54	19.77	18.37	0.03	11.95	0.22
1	2439630	2439631	DER_site	6	+	0.68	48.07	9.04	5.86	18.15	0.11	6.42	0.70
1	2457041	2457042	DER_site	8	+	0.96	60.65	11.67	8.34	19.47	0.08	19.52	0.08
1	2457044	2457045	DER_site	2	+	-0.08	26.72	4.64	1.84	13.58	0.33	13.04	0.37
1	2457209	2457210	DER_site	4	+	0.77	37.15	6.78	3.76	7.56	0.82	6.14	0.91
1	2457210	2457211	DER_site	41	+	1.78	216.25	44.92	40.74	7.12	0.85	16.03	0.19
1	2457212	2457213	DER_site	16	+	1.27	99.29	19.86	16.19	25.22	0.01	6.78	0.87
1	2457240	2457241	DER_site	4	+	0.68	36.63	6.67	3.67	21.04	0.01	8.76	0.72
1	2460475	2460476	DER_site	4	+	1.14	37.72	6.89	3.87	17.24	0.14	17.85	0.12
1	2460493	2460494	DER_site	32	+	1.40	174.83	36.02	31.97	12.42	0.41	3.35	0.95
1	2460494	2460495	DER_site	81	+	2.12	406.06	85.87	81.19	11.48	0.49	10.52	0.57
1	2460495	2460496	DER_site	44	+	2.53	231.82	48.27	44.04	11.08	0.52	12.29	0.42
1	2460497	2460498	DER_site	2	+	1.76	25.89	4.48	1.70	9.17	0.42	10.86	0.54
1	2460537	2460538	DER_site	2	+	0.56	25.19	4.34	1.57	8.44	0.75	11.63	0.48
1	2460637	2460638	DER_site	17	+	1.46	101.31	20.29	16.61	6.88	0.65	23.44	0.01
1	2460652	2460653	DER_site	6	+	1.19	47.57	8.94	5.76	10.86	0.29	10.85	0.54
1	2460653	2460654	DER_site	11	+	1.41	74.67	14.63	11.16	10.74	0.55	9.33	0.67
1	2460654	2460655	DER_site	3	+	-0.23	32.74	6.44	3.45	19.12	0.02	4.91	0.84
1	2460660	2460661	DER_site	9	+	1.19	62.03	11.96	8.61	36.51	0.00	20.00	0.07
1	2460661	2460662	DER_site	11	+	0.57	74.51	14.60	11.13	35.65	0.00	19.51	0.08
1	2460662	2460663	DER_site	7	+	0.82	51.73	9.80	6.57	23.87	0.02	13.51	0.33
1	2460666	2460667	DER_site	9	+	-0.02	59.63	12.15	8.79	16.22	0.01	7.83	0.55
1	2463121	2463122	DER_site	6	-	1.47	47.37	8.89	5.72	14.32	0.28	10.10	0.61
1	2463131	2463132	DER_site	4	-	0.95	40.36	7.44	4.37	11.04	0.27	15.73	0.20
1	2463132	2463133	DER_site	48	-	1.62	248.94	51.96	47.68	10.30	0.59	17.31	0.14
1	2463178	2463179	DER_site	6	-	0.86	49.61	9.36	6.16	19.11	0.09	12.09	0.44
1	2463181	2463182	DER_site	7	-	1.24	55.66	10.63	7.35	17.59	0.13	7.69	0.81
1	2463185	2463186	DER_site	76	-	2.72	383.97	81.09	76.46	17.14	0.14	8.19	0.77
1	2463188	2463189	DER_site	63	-	1.70	322.02	67.72	63.22	8.32	0.76	10.47	0.58
1	2463189	2463190	DER_site	2	-	-0.04	25.36	4.37	1.60	11.05	0.53	12.59	0.40
1	2463307	2463308	DER_site	4	-	1.13	39.63	7.29	4.23	4.52	0.87	14.33	0.28
1	2463308	2463309	DER_site	48	-	2.28	250.30	52.25	47.96	9.52	0.66	8.55	0.74
1	2463309	2463310	DER_site	4	-	1.37	37.78	6.90	3.88	13.96	0.30	12.74	0.39
1	2469034	2469035	DER_site	2	+	2.82	28.01	4.91	2.08	3.29	0.35	16.10	0.19
1	2489553	2489554	DER_site	3	-	3.41	33.66	6.06	3.11	9.99	0.35	8.97	0.71
1	2537779	2537780	DER_site	5	+	0.42	43.76	8.14	5.02	5.25	0.81	10.14	0.60
1	2537780	2537781	DER_site	8	+	1.54	57.27	11.65	8.31	9.57	0.39	7.59	0.58
1	2537843	2537844	DER_site	6	+	2.70	46.60	8.73	5.57	11.41	0.25	12.62	0.40
1	2537844	2537845	DER_site	31	+	3.02	172.53	35.52	31.48	9.58	0.65	18.62	0.10
1	2537850	2537851	DER_site	3	+	0.67	31.91	5.70	2.79	12.60	0.40	8.99	0.70
1	2537886	2537887	DER_site	2	+	1.15	26.53	5.13	2.27	3.59	0.94	6.94	0.64
1	2573283	2573284	DER_site	2	+	2.30	22.22	4.83	2.00	2.54	0.86	3.16	0.79
1	2573301	2573302	DER_site	2	+	3.49	27.15	5.26	2.39	6.07	0.42	12.37	0.19
1	2573991	2573992	DER_site	2	-	1.24	27.10	5.25	2.38	6.06	0.42	5.59	0.78
1	2573997	2573998	DER_site	2	-	1.00	27.66	5.37	2.49	8.41	0.21	5.27	0.81
1	2574009	2574010	DER_site	2	-	1.25	25.59	4.42	1.64	6.01	0.74	4.35	0.98
1	2574022	2574023	DER_site	4	-	1.21	40.64	7.50	4.42	6.98	0.64	8.58	0.74
1	2574062	2574063	DER_site	5	-	1.58	43.15	8.02	4.91	9.08	0.70	3.11	0.96
1	2574066	2574067	DER_site	2	-	-0.73	25.36	4.37	1.60	10.20	0.60	11.80	0.46
1	2574138	2574139	DER_site	5	-	1.76	42.68	7.92	4.82	16.32	0.01	13.09	0.36
1	2574139	2574140	DER_site	2	-	2.33	23.52	4.50	1.72	6.66	0.35	5.28	0.81
1	2574185	2574186	DER_site	3	-	0.33	32.54	6.40	3.42	8.40	0.49	8.31	0.50
1	2637723	2637724	DER_site	13	+	0.91	81.86	16.15	12.62	13.26	0.35	14.52	0.27
1	2637724	2637725	DER_site	30	+	1.55	164.06	33.70	29.70	17.82	0.12	9.60	0.65
1	2637726	2637727	DER_site	3	+	1.01	34.99	6.33	3.36	6.45	0.89	15.98	0.19
1	2637737	2637738	DER_site	3	+	0.64	30.29	5.92	2.98	9.75	0.37	19.53	0.00
1	2637757	2637758	DER_site	53	+	2.42	271.68	56.86	52.50	8.77	0.72	10.46	0.58
1	2637759	2637760	DER_site	24	+	1.86	135.66	27.62	23.75	9.87	0.63	6.45	0.89
1	2637762	2637763	DER_site	6	+	0.65	49.78	9.40	6.19	27.38	0.01	16.25	0.18
1	2637770	2637771	DER_site	47	+	1.64	243.99	50.89	46.63	7.32	0.60	8.56	0.74
1	2637774	2637775	DER_site	6	+	0.81	47.03	8.82	5.65	17.75	0.12	15.50	0.22
1	2637796	2637797	DER_site	11	+	0.92	74.45	14.59	11.11	9.10	0.69	19.76	0.07
1	2637797	2637798	DER_site	5	+	0.60	41.06	8.20	5.07	4.84	0.85	4.62	0.87
1	2637798	2637799	DER_site	6	+	0.36	45.41	9.12	5.93	6.92	0.65	6.62	0.68
1	2637799	2637800	DER_site	1	+	0.54	21.30	4.04	1.32	6.47	0.69	7.96	0.54
1	2637821	2637822	DER_site	52	+	2.38	269.07	56.30	51.95	12.95	0.37	13.45	0.34
1	2637831	2637832	DER_site	6	+	0.95	50.61	9.57	6.35	12.23	0.43	17.63	0.13
1	2637832	2637833	DER_site	3	+	0.69	32.74	5.87	2.94	5.42	0.94	10.52	0.57
1	2637833	2637834	DER_site	3	+	0.84	32.25	5.77	2.85	13.52	0.33	11.43	0.49
1	2637857	2637858	DER_site	14	+	0.98	90.36	17.96	14.35	2.73	0.84	12.03	0.44
1	2640472	2640473	DER_site	1	+	2.16	24.35	4.17	1.43	10.23	0.33	6.22	0.72
1	2640511	2640512	DER_site	3	+	3.36	29.07	6.31	3.34	4.24	0.64	2.09	0.91
1	2640931	2640932	DER_site	18	-	0.35	110.30	22.20	18.47	62.01	0.00	27.05	0.01
1	2640933	2640934	DER_site	105	-	0.74	516.95	109.84	104.98	157.80	0.00	46.96	0.00
1	2640934	2640935	DER_site	12	-	0.58	76.79	15.08	11.59	9.01	0.70	14.17	0.29
1	2640935	2640936	DER_site	6	-	0.78	50.18	9.48	6.27	10.00	0.62	28.08	0.01
1	2640936	2640937	DER_site	9	-	0.52	63.87	12.35	8.98	25.00	0.01	23.34	0.02
1	2667918	2667919	DER_site	7	-	2.64	49.08	9.90	6.67	7.29	0.29	5.98	0.74
1	2674579	2674580	DER_site	3	+	3.10	28.53	5.55	2.65	7.68	0.26	5.09	0.83
1	2685488	2685489	DER_site	6	+	2.37	40.53	8.80	5.63	7.05	0.32	7.67	0.26
1	2685528	2685529	DER_site	2	+	1.56	27.80	4.86	2.04	2.13	0.91	6.98	0.86
1	2685707	2685708	DER_site	3	-	2.72	30.49	5.96	3.02	5.51	0.14	8.65	0.47
1	2685818	2685819	DER_site	4	-	2.10	35.88	6.51	3.52	10.74	0.55	13.63	0.33
1	2685879	2685880	DER_site	2	-	1.99	28.59	5.02	2.18	13.16	0.16	6.90	0.86
1	2691234	2691235	DER_site	2	-	2.11	25.40	4.90	2.07	6.39	0.38	9.15	0.42
1	2691353	2691354	DER_site	3	-	5.51	32.40	6.36	3.39	0.00	1.00	4.96	0.84
1	2700867	2700868	DER_site	1	+	1.65	21.90	4.16	1.42	3.03	0.81	6.98	0.64
1	2700874	2700875	DER_site	2	+	0.95	22.12	4.80	1.98	2.57	0.86	0.91	0.99
1	2700887	2700888	DER_site	4	+	0.97	33.89	6.68	3.68	10.08	0.34	10.72	0.30
1	2700890	2700891	DER_site	25	+	2.64	136.66	28.70	24.80	7.49	0.59	4.83	0.85
1	2700891	2700892	DER_site	4	+	1.61	37.05	6.75	3.74	10.67	0.30	8.38	0.50
1	2700892	2700893	DER_site	4	+	1.82	38.10	6.97	3.94	16.51	0.17	9.12	0.69
1	2700900	2700901	DER_site	4	+	2.13	36.42	7.21	4.17	12.64	0.05	7.39	0.60
1	2706734	2706735	DER_site	2	+	1.58	26.95	4.69	1.89	8.01	0.53	15.85	0.20
1	2748468	2748469	DER_site	3	-	1.85	31.29	5.57	2.67	3.77	0.71	17.47	0.13
1	2748469	2748470	DER_site	3	-	2.28	29.08	5.67	2.76	7.18	0.62	7.32	0.60
1	2748491	2748492	DER_site	15	-	3.51	95.13	18.97	15.33	11.91	0.45	7.05	0.85
1	2748493	2748494	DER_site	2	-	1.64	28.70	5.05	2.20	11.69	0.47	15.76	0.20
1	2748562	2748563	DER_site	2	-	1.35	23.95	4.59	1.80	7.89	0.25	7.61	0.57
1	2809848	2809849	DER_site	4	-	2.91	36.12	7.15	4.11	6.16	0.41	5.56	0.78
1	2809857	2809858	DER_site	4	-	2.81	35.79	6.50	3.51	9.28	0.41	11.40	0.49
1	2821628	2821629	DER_site	4	-	2.74	40.99	7.57	4.49	22.36	0.03	8.26	0.76
1	2829147	2829148	DER_site	3	+	1.21	31.25	6.12	3.17	7.04	0.63	6.63	0.68
1	2829148	2829149	DER_site	5	+	2.13	41.17	8.22	5.10	7.80	0.55	5.96	0.43
1	2829151	2829152	DER_site	9	+	1.99	61.84	11.93	8.58	9.98	0.62	5.25	0.95
1	2829189	2829190	DER_site	23	+	2.94	132.53	26.95	23.09	12.90	0.38	7.52	0.82
1	2829191	2829192	DER_site	6	+	2.13	49.03	9.24	6.04	10.94	0.53	4.08	0.98
1	2829193	2829194	DER_site	1	+	1.92	23.94	4.09	1.36	12.16	0.43	5.83	0.76
1	2829195	2829196	DER_site	5	+	1.23	43.76	8.14	5.02	5.59	0.47	5.32	0.95
1	2829208	2829209	DER_site	4	+	0.46	33.58	6.62	3.62	15.97	0.07	5.81	0.76
1	2829213	2829214	DER_site	3	+	1.53	30.46	5.40	2.52	5.14	0.82	8.89	0.71
1	2829214	2829215	DER_site	19	+	2.76	110.55	22.25	18.52	15.63	0.21	12.40	0.41
1	2829215	2829216	DER_site	5	+	1.87	40.88	8.16	5.04	6.39	0.70	5.42	0.80
1	2829216	2829217	DER_site	3	+	-0.91	30.82	6.03	3.09	6.89	0.65	8.70	0.47
1	2855624	2855625	DER_site	2	+	2.74	23.35	4.47	1.69	12.72	0.18	1.39	0.97
1	2877076	2877077	DER_site	5	+	1.01	44.28	8.25	5.12	3.71	0.93	5.83	0.92
1	2877094	2877095	DER_site	24	+	2.95	135.04	28.35	24.46	3.38	0.95	7.60	0.57
1	2884205	2884206	DER_site	2	+	2.81	22.65	4.32	1.56	6.52	0.09	4.42	0.88
1	2895211	2895212	DER_site	2	-	1.76	25.50	4.92	2.08	11.30	0.08	6.69	0.67
1	2895256	2895257	DER_site	2	-	2.36	26.26	4.55	1.76	7.45	0.59	7.52	0.82
1	2921190	2921191	DER_site	1	-	2.89	21.86	4.16	1.42	6.84	0.34	3.49	0.94
1	2921191	2921192	DER_site	3	-	3.40	31.99	6.28	3.31	9.06	0.43	3.80	0.92
1	2939674	2939675	DER_site	2	-	-1.50	20.19	4.39	1.62	2.91	0.82	5.52	0.48
1	2939677	2939678	DER_site	2	-	1.51	27.87	4.88	2.05	9.43	0.40	7.01	0.86
1	2939678	2939679	DER_site	17	-	2.87	104.11	20.88	17.19	6.17	0.72	15.75	0.20
1	2939679	2939680	DER_site	22	-	3.13	120.08	26.07	22.24	0.80	0.85	6.85	0.34
1	2939680	2939681	DER_site	20	-	3.00	114.53	23.93	20.15	6.57	0.68	4.37	0.89
1	2939681	2939682	DER_site	19	-	2.86	107.42	22.41	18.67	6.33	0.71	4.34	0.89
1	2939745	2939746	DER_site	16	-	3.29	99.79	19.96	16.29	9.56	0.39	7.24	0.84
1	2939746	2939747	DER_site	4	-	2.19	38.91	7.14	4.10	3.53	0.74	10.73	0.55
1	2942733	2942734	DER_site	3	-	2.24	31.33	5.58	2.68	6.69	0.35	7.54	0.82
1	2948970	2948971	DER_site	1	+	1.37	22.02	4.19	1.45	4.39	0.62	5.38	0.80
1	2948994	2948995	DER_site	12	+	3.24	73.05	15.02	11.53	9.22	0.42	10.91	0.28
1	2949096	2949097	DER_site	5	+	2.51	41.25	7.62	4.54	11.44	0.49	1.86	0.99
1	2952999	2953000	DER_site	7	-	3.85	51.04	10.32	7.06	5.43	0.49	3.51	0.94
1	2973051	2973052	DER_site	1	-	1.00	21.57	4.10	1.36	13.20	0.15	7.81	0.55
1	2973052	2973053	DER_site	9	-	2.15	59.61	12.15	8.79	9.64	0.38	1.54	1.00
1	2973053	2973054	DER_site	3	-	1.81	29.52	5.76	2.84	2.43	0.88	3.80	0.92
1	2973060	2973061	DER_site	4	-	1.90	39.76	7.31	4.26	5.16	0.82	7.15	0.85
1	2973062	2973063	DER_site	4	-	1.37	40.50	7.47	4.40	3.41	0.76	8.68	0.73
1	2973075	2973076	DER_site	3	-	1.40	30.62	5.99	3.05	13.79	0.13	8.06	0.53
1	2973116	2973117	DER_site	7	-	1.57	51.72	10.46	7.20	4.48	0.88	10.54	0.31
1	2997928	2997929	DER_site	2	+	2.74	27.21	4.74	1.93	4.12	0.25	9.82	0.63
1	2997930	2997931	DER_site	2	+	2.30	25.09	4.32	1.56	9.58	0.65	11.42	0.49
1	2998034	2998035	DER_site	2	+	1.42	22.49	4.29	1.53	9.28	0.41	6.92	0.65
1	2998049	2998050	DER_site	15	+	3.20	87.90	18.21	14.60	8.74	0.46	6.09	0.73
1	2998100	2998101	DER_site	2	+	1.90	27.02	5.23	2.37	3.21	0.78	12.88	0.17
1	2998193	2998194	DER_site	2	-	3.00	28.52	5.01	2.17	11.69	0.07	15.39	0.22
1	3012842	3012843	DER_site	4	-	2.14	41.03	7.58	4.50	6.46	0.37	6.40	0.89
1	3018017	3018018	DER_site	7	+	1.31	51.04	10.32	7.06	7.96	0.54	6.34	0.71
1	3018019	3018020	DER_site	3	+	-0.16	30.54	5.97	3.03	11.39	0.25	7.31	0.61
1	3018073	3018074	DER_site	36	+	1.59	194.64	40.27	36.16	11.05	0.27	9.85	0.63
1	3018079	3018080	DER_site	12	+	1.30	77.64	15.26	11.76	8.54	0.74	9.71	0.64
1	3018080	3018081	DER_site	2	+	-0.26	29.81	5.27	2.40	12.51	0.41	10.10	0.61
1	3018081	3018082	DER_site	9	+	0.40	64.40	12.46	9.09	19.77	0.02	13.92	0.31
1	3018103	3018104	DER_site	6	+	0.93	50.46	9.54	6.32	8.70	0.73	11.16	0.51
1	3018106	3018107	DER_site	8	+	0.50	59.74	11.48	8.16	14.05	0.12	11.50	0.49
1	3018107	3018108	DER_site	8	+	0.72	57.10	11.61	8.28	11.11	0.27	2.49	0.98
1	3018108	3018109	DER_site	6	+	0.53	48.71	9.17	5.98	27.57	0.01	17.39	0.14
1	3018139	3018140	DER_site	26	+	1.22	147.16	30.08	26.15	5.83	0.92	16.63	0.16
1	3018146	3018147	DER_site	4	+	1.52	40.08	7.38	4.32	17.50	0.04	6.13	0.91
1	3018147	3018148	DER_site	3	+	2.89	32.29	5.78	2.86	7.37	0.60	9.49	0.66
1	3018148	3018149	DER_site	10	+	2.33	66.80	12.97	9.57	10.53	0.57	10.47	0.58
1	3045108	3045109	DER_site	2	+	-1.30	23.24	4.44	1.67	9.34	0.41	4.89	0.84
1	3045110	3045111	DER_site	3	+	0.26	27.75	5.39	2.50	4.73	0.86	9.36	0.40
1	3045111	3045112	DER_site	18	+	2.61	102.35	21.31	17.60	6.85	0.65	9.59	0.38
1	3045141	3045142	DER_site	9	+	1.90	58.59	11.93	8.58	9.29	0.16	6.52	0.69
1	3045177	3045178	DER_site	3	+	1.58	32.18	5.76	2.84	24.03	0.02	6.73	0.88
1	3045211	3045212	DER_site	5	+	1.74	45.19	8.44	5.30	13.50	0.33	12.21	0.43
1	3045212	3045213	DER_site	8	+	2.03	59.27	11.39	8.07	14.80	0.25	4.84	0.85
1	3079414	3079415	DER_site	2	+	3.42	28.18	4.94	2.10	7.24	0.61	7.35	0.60
1	3094736	3094737	DER_site	2	+	2.03	25.97	5.01	2.17	14.20	0.12	10.39	0.32
1	3095331	3095332	DER_site	4	-	1.31	39.77	7.32	4.26	13.00	0.37	5.27	0.81
1	3107627	3107628	DER_site	3	+	1.72	32.64	6.42	3.43	11.11	0.27	4.56	0.87
1	3107651	3107652	DER_site	4	+	0.61	38.48	7.05	4.02	18.10	0.11	10.25	0.59
1	3107652	3107653	DER_site	35	+	2.27	191.17	39.53	35.43	9.74	0.37	13.30	0.35
1	3107654	3107655	DER_site	9	+	1.70	62.18	12.00	8.64	11.26	0.51	16.54	0.17
1	3107655	3107656	DER_site	5	+	-1.32	43.25	8.04	4.93	10.96	0.53	10.32	0.59
1	3107658	3107659	DER_site	8	+	1.23	59.89	11.51	8.19	19.40	0.08	11.22	0.51
1	3107659	3107660	DER_site	8	+	1.78	57.66	11.05	7.75	9.31	0.68	25.71	0.01
1	3107660	3107661	DER_site	4	+	1.96	38.56	7.07	4.03	8.96	0.44	10.73	0.55
1	3107662	3107663	DER_site	11	+	1.88	73.78	14.44	10.98	8.92	0.44	12.59	0.40
1	3107667	3107668	DER_site	3	+	2.46	35.07	6.35	3.37	6.19	0.72	11.47	0.49
1	3107669	3107670	DER_site	30	+	2.11	161.28	34.01	30.00	7.54	0.58	10.58	0.31
1	3107706	3107707	DER_site	2	+	0.57	29.98	5.31	2.43	7.30	0.61	11.90	0.45
1	3107717	3107718	DER_site	8	+	1.76	54.27	11.01	7.71	9.39	0.40	5.04	0.83
1	3112906	3112907	DER_site	12	-	2.62	78.71	15.49	11.98	11.10	0.52	10.49	0.57
1	3112907	3112908	DER_site	5	-	2.51	45.96	8.60	5.45	10.03	0.61	16.43	0.17
1	3112908	3112909	DER_site	13	-	2.92	78.07	16.95	13.38	4.56	0.60	6.51	0.37
1	3112980	3112981	DER_site	4	-	2.14	38.55	7.06	4.03	7.19	0.62	9.48	0.66
1	3112981	3112982	DER_site	1	-	1.40	24.21	4.14	1.40	7.30	0.29	10.06	0.61
1	3112982	3112983	DER_site	2	-	1.67	27.76	4.86	2.03	5.11	0.53	16.46	0.17
1	3112988	3112989	DER_site	6	-	1.54	48.34	9.10	5.91	9.12	0.69	14.66	0.26
1	3112989	3112990	DER_site	9	-	1.77	62.65	12.09	8.74	6.96	0.86	3.23	0.99
1	3112991	3112992	DER_site	10	-	2.17	67.43	13.10	9.70	8.08	0.78	7.05	0.63
1	3112992	3112993	DER_site	5	-	1.64	41.54	7.68	4.60	7.48	0.82	11.36	0.50
1	3122260	3122261	DER_site	6	+	-1.15	47.10	8.84	5.67	34.29	0.00	8.82	0.72
1	3122261	3122262	DER_site	82	+	2.82	408.17	86.32	81.64	20.72	0.05	11.04	0.53
1	3122263	3122264	DER_site	7	+	1.68	55.30	10.55	7.28	8.74	0.72	9.08	0.70
1	3122296	3122297	DER_site	19	+	1.52	114.71	23.14	19.38	19.11	0.09	5.98	0.92
1	3122298	3122299	DER_site	8	+	1.07	57.70	11.05	7.75	7.47	0.82	8.34	0.76
1	3122337	3122338	DER_site	2	+	1.98	27.49	4.80	1.98	9.99	0.35	9.90	0.62
1	3122341	3122342	DER_site	50	+	3.04	256.68	54.63	50.30	4.77	0.57	7.07	0.63
1	3127877	3127878	DER_site	2	-	2.37	20.58	4.47	1.69	5.61	0.47	1.71	0.63
1	3136299	3136300	DER_site	4	-	0.55	38.88	7.13	4.09	26.94	0.01	8.43	0.75
1	3136300	3136301	DER_site	6	-	1.75	48.07	9.04	5.86	9.54	0.66	8.81	0.72
1	3136303	3136304	DER_site	11	-	1.04	76.20	14.95	11.47	9.76	0.64	13.70	0.32
1	3136305	3136306	DER_site	64	-	1.99	323.73	68.09	63.59	16.88	0.15	14.73	0.26
1	3136314	3136315	DER_site	3	-	0.61	32.99	5.92	2.98	12.91	0.17	20.03	0.07
1	3136316	3136317	DER_site	20	-	2.60	118.17	23.88	20.10	18.50	0.10	8.99	0.70
1	3136317	3136318	DER_site	7	-	3.01	54.75	10.43	7.17	7.12	0.31	18.79	0.09
1	3136319	3136320	DER_site	92	-	3.02	457.64	97.01	92.26	19.77	0.02	14.80	0.25
1	3136324	3136325	DER_site	8	-	1.66	57.06	10.92	7.63	10.68	0.30	25.21	0.01
1	3136325	3136326	DER_site	8	-	2.83	57.91	11.10	7.80	5.38	0.50	10.86	0.54
1	3159177	3159178	DER_site	4	-	2.52	38.50	7.05	4.02	6.86	0.33	11.63	0.48
1	3159178	3159179	DER_site	1	-	1.81	21.35	4.05	1.33	9.37	0.15	7.30	0.61
1	3159231	3159232	DER_site	2	-	2.26	26.11	5.04	2.20	8.55	0.20	6.80	0.66
1	3159285	3159286	DER_site	2	-	1.53	26.94	4.69	1.88	6.83	0.65	8.88	0.45
1	3159341	3159342	DER_site	2	-	1.61	25.84	4.47	1.69	9.11	0.17	9.27	0.68
1	3165157	3165158	DER_site	4	+	2.07	31.66	6.87	3.85	4.25	0.64	3.45	0.75
1	3165161	3165162	DER_site	2	+	1.93	23.84	5.18	2.31	7.23	0.30	7.93	0.24
1	3165169	3165170	DER_site	12	+	4.69	78.35	15.41	11.91	3.37	0.34	8.10	0.78
1	3165170	3165171	DER_site	3	+	2.85	34.33	6.20	3.24	5.35	0.80	10.56	0.57
1	3165171	3165172	DER_site	2	+	-0.41	26.73	5.17	2.31	5.66	0.77	7.30	0.61
1	3165202	3165203	DER_site	2	+	1.29	28.62	5.03	2.18	11.43	0.49	10.21	0.60
1	3165205	3165206	DER_site	8	+	3.10	56.05	11.39	8.07	15.66	0.07	4.37	0.89
1	3165421	3165422	DER_site	8	-	2.04	57.51	11.70	8.36	7.29	0.30	4.85	0.85
1	3165456	3165457	DER_site	3	-	2.49	28.75	5.60	2.69	11.01	0.09	10.39	0.32
1	3165458	3165459	DER_site	17	-	1.74	103.49	20.75	17.06	4.90	0.84	13.97	0.30
1	3176795	3176796	DER_site	7	+	2.20	50.51	10.21	6.95	10.46	0.31	2.79	0.97
1	3195965	3195966	DER_site	2	-	3.79	24.66	4.74	1.93	4.43	0.62	6.16	0.72
1	3204053	3204054	DER_site	2	+	3.00	25.84	4.99	2.15	5.69	0.77	8.21	0.51
1	3224748	3224749	DER_site	2	-	2.98	18.90	4.86	2.03	1.10	0.78	1.27	0.74
1	3224768	3224769	DER_site	3	-	3.36	32.03	5.72	2.81	5.90	0.75	11.11	0.52
1	3224813	3224814	DER_site	3	-	2.89	29.02	5.65	2.74	4.58	0.60	3.06	0.96
1	3255280	3255281	DER_site	2	+	1.24	26.84	4.67	1.86	10.07	0.61	7.48	0.28
1	3255605	3255606	DER_site	3	+	2.13	28.10	5.46	2.57	2.47	0.87	4.30	0.89
1	3256482	3256483	DER_site	3	-	2.39	25.12	5.45	2.56	6.99	0.32	6.59	0.36
1	3256483	3256484	DER_site	2	-	2.31	20.99	5.34	2.46	4.34	0.23	1.10	0.78
1	3256484	3256485	DER_site	3	-	2.47	25.57	5.55	2.65	6.94	0.33	3.32	0.77
1	3275800	3275801	DER_site	4	+	3.35	34.19	7.42	4.36	3.17	0.79	6.80	0.34
1	3333715	3333716	DER_site	1	-	1.33	21.42	4.07	1.34	5.80	0.45	7.87	0.55
1	3333716	3333717	DER_site	2	-	2.37	22.87	4.37	1.60	4.50	0.21	9.48	0.39
1	3346477	3346478	DER_site	3	-	1.44	28.63	5.57	2.67	12.24	0.20	14.19	0.12
1	3346486	3346487	DER_site	4	-	2.32	37.90	7.53	4.45	2.07	0.91	6.38	0.70
1	3346524	3346525	DER_site	9	-	2.24	62.24	12.01	8.65	5.52	0.79	9.16	0.69
1	3377277	3377278	DER_site	2	+	1.81	20.03	4.35	1.58	3.83	0.70	2.56	0.86
1	3377278	3377279	DER_site	2	+	1.87	23.99	5.21	2.35	1.47	0.69	4.07	0.67
1	3377279	3377280	DER_site	2	+	1.91	26.41	5.11	2.25	0.71	0.87	4.65	0.86
1	3381649	3381650	DER_site	9	-	4.70	60.39	12.31	8.95	1.34	0.97	4.37	0.89
1	3381651	3381652	DER_site	3	-	3.04	32.44	6.37	3.40	9.50	0.39	4.31	0.89
1	3395591	3395592	DER_site	6	-	6.21	46.93	8.80	5.63	0.00	1.00	11.73	0.47
1	3395593	3395594	DER_site	8	-	4.22	57.32	11.66	8.33	2.37	0.50	10.77	0.29
1	3395595	3395596	DER_site	2	-	5.32	27.41	5.32	2.44	0.00	1.00	13.34	0.15
1	3397153	3397154	DER_site	10	-	3.08	67.33	13.80	10.36	6.58	0.36	6.94	0.64
1	3407208	3407209	DER_site	2	-	3.60	24.42	5.30	2.43	4.91	0.55	5.96	0.43
1	3428565	3428566	DER_site	5	-	3.35	39.69	7.91	4.81	15.69	0.07	4.86	0.85
1	3460037	3460038	DER_site	4	-	1.88	36.31	6.60	3.61	7.66	0.81	11.19	0.51
1	3460038	3460039	DER_site	6	-	2.32	49.07	9.25	6.05	11.28	0.26	11.23	0.51
1	3460039	3460040	DER_site	9	-	2.83	61.76	11.91	8.56	6.65	0.88	6.97	0.86
1	3460077	3460078	DER_site	9	-	2.35	61.51	11.86	8.51	13.92	0.31	6.04	0.91
1	3460079	3460080	DER_site	7	-	2.61	53.13	10.10	6.85	7.29	0.84	9.90	0.63
1	3460106	3460107	DER_site	3	-	1.36	32.57	6.40	3.42	16.45	0.06	7.84	0.55
1	3471361	3471362	DER_site	1	+	1.60	21.35	4.05	1.33	5.19	0.82	3.44	0.94
1	3471364	3471365	DER_site	2	+	2.30	24.70	4.75	1.93	7.82	0.55	5.06	0.83
1	3471366	3471367	DER_site	5	+	2.36	41.41	8.27	5.14	7.90	0.25	7.39	0.60
1	3471404	3471405	DER_site	3	+	1.91	34.37	6.20	3.24	3.60	0.73	6.76	0.87
1	3491374	3491375	DER_site	4	-	2.92	30.53	6.63	3.63	1.98	0.92	0.25	0.97
1	3502132	3502133	DER_site	11	-	2.39	70.04	14.38	10.92	12.62	0.05	5.79	0.76
1	3502150	3502151	DER_site	4	-	-1.12	36.47	6.63	3.63	8.94	0.18	7.55	0.82
1	3502151	3502152	DER_site	5	-	-1.23	42.44	7.87	4.77	17.87	0.12	6.78	0.87
1	3502154	3502155	DER_site	11	-	1.88	69.27	14.21	10.76	8.79	0.46	8.80	0.46
1	3502155	3502156	DER_site	31	-	2.82	170.99	35.19	31.16	8.21	0.77	6.72	0.88
1	3502159	3502160	DER_site	2	-	2.30	27.28	4.76	1.94	9.84	0.36	11.14	0.52
1	3513032	3513033	DER_site	5	-	-1.52	42.02	7.78	4.69	9.69	0.64	15.62	0.21
1	3513033	3513034	DER_site	4	-	-1.46	39.18	7.19	4.15	12.73	0.39	9.49	0.66
1	3513034	3513035	DER_site	5	-	-1.80	42.94	7.97	4.87	18.97	0.09	9.08	0.43
1	3513037	3513038	DER_site	7	-	2.02	52.90	10.72	7.43	5.48	0.79	10.88	0.28
1	3513038	3513039	DER_site	23	-	3.13	127.72	26.78	22.92	6.53	0.69	13.44	0.14
1	3513109	3513110	DER_site	3	-	2.37	31.00	5.51	2.62	6.42	0.89	21.52	0.04
1	3513111	3513112	DER_site	7	-	2.02	52.04	9.87	6.64	9.82	0.36	13.49	0.33
1	3513112	3513113	DER_site	5	-	2.11	42.42	7.86	4.77	11.01	0.53	8.58	0.74
1	3538154	3538155	DER_site	1	+	0.97	24.77	4.25	1.50	6.87	0.65	10.57	0.57
1	3538155	3538156	DER_site	7	+	1.43	52.29	9.92	6.68	10.38	0.32	11.23	0.51
1	3538168	3538169	DER_site	2	+	1.17	28.30	4.96	2.13	5.50	0.79	8.69	0.73
1	3538170	3538171	DER_site	7	+	1.71	50.46	10.20	6.94	5.46	0.79	8.58	0.48
1	3538172	3538173	DER_site	5	+	2.30	44.47	8.29	5.16	15.00	0.09	15.17	0.23
1	3538182	3538183	DER_site	10	+	1.46	67.58	13.13	9.73	6.17	0.91	8.27	0.76
1	3538184	3538185	DER_site	2	+	2.32	29.23	5.15	2.30	10.18	0.60	11.38	0.50
1	3538185	3538186	DER_site	7	+	1.99	53.35	10.14	6.89	15.20	0.23	12.96	0.37
1	3538186	3538187	DER_site	12	+	1.53	81.02	15.97	12.45	11.22	0.51	6.05	0.74
1	3538201	3538202	DER_site	5	+	1.22	41.51	7.68	4.59	4.98	0.84	11.81	0.46
1	3538204	3538205	DER_site	3	+	1.44	32.45	5.81	2.88	13.57	0.33	5.56	0.94
1	3538206	3538207	DER_site	5	+	1.26	42.62	8.53	5.38	3.45	0.94	13.13	0.16
1	3538207	3538208	DER_site	5	+	1.34	43.74	8.14	5.02	2.64	0.85	13.90	0.31
1	3538231	3538232	DER_site	4	+	1.26	36.08	7.14	4.10	19.78	0.02	5.47	0.79
1	3538237	3538238	DER_site	2	+	0.95	25.84	4.99	2.15	3.76	0.93	8.60	0.20
1	3538247	3538248	DER_site	10	+	0.36	69.74	13.59	10.16	6.44	0.89	17.22	0.14
1	3568260	3568261	DER_site	2	-	5.39	27.25	5.28	2.41	0.00	1.00	9.36	0.40
1	3581047	3581048	DER_site	3	-	2.23	28.21	5.48	2.59	5.99	0.42	4.87	0.56
1	3581155	3581156	DER_site	3	-	-1.59	31.35	6.14	3.19	5.33	0.80	4.88	0.56
1	3607709	3607710	DER_site	2	-	1.33	22.74	4.34	1.58	14.99	0.09	4.24	0.90
1	3607735	3607736	DER_site	12	-	2.84	72.91	14.99	11.50	7.22	0.30	4.00	0.91
1	3607738	3607739	DER_site	8	-	1.66	57.51	11.01	7.72	4.90	0.56	5.15	0.95
1	3607739	3607740	DER_site	8	-	2.34	56.73	11.53	8.20	3.24	0.78	8.34	0.50
1	3607740	3607741	DER_site	7	-	4.43	52.20	9.90	6.67	2.49	0.48	12.57	0.40
1	3607741	3607742	DER_site	5	-	3.38	41.66	7.71	4.62	7.44	0.83	10.05	0.35
1	3607768	3607769	DER_site	4	-	1.52	39.56	7.27	4.22	8.09	0.53	14.73	0.26
1	3607793	3607794	DER_site	22	-	2.72	127.40	25.85	22.02	9.87	0.36	8.49	0.75
1	3607796	3607797	DER_site	10	-	2.43	63.12	12.90	9.50	6.70	0.67	5.65	0.77
1	3607818	3607819	DER_site	32	-	4.48	175.75	36.21	32.16	6.10	0.91	8.34	0.76
1	3607836	3607837	DER_site	11	-	2.28	72.63	14.20	10.74	10.15	0.60	11.21	0.51
1	3614467	3614468	DER_site	4	+	3.74	40.38	7.44	4.38	11.03	0.53	9.90	0.63
1	3614578	3614579	DER_site	3	-	3.14	25.63	5.57	2.66	1.92	0.59	3.52	0.74
1	3614581	3614582	DER_site	3	-	1.02	26.20	5.69	2.78	3.45	0.75	3.86	0.70
1	3614684	3614685	DER_site	10	-	3.33	68.76	13.38	9.96	10.90	0.54	12.96	0.37
1	3663699	3663700	DER_site	12	+	2.09	77.58	15.25	11.75	3.78	0.71	10.76	0.55
1	3663702	3663703	DER_site	3	+	1.00	35.31	6.40	3.42	13.16	0.36	6.30	0.90
1	3663787	3663788	DER_site	8	+	2.44	56.10	11.40	8.08	7.78	0.26	5.99	0.74
1	3663825	3663826	DER_site	1	+	-0.50	24.63	4.22	1.48	5.51	0.79	12.28	0.42
1	3663826	3663827	DER_site	6	+	1.42	49.86	9.41	6.21	8.88	0.45	13.27	0.35
1	3663829	3663830	DER_site	10	+	1.61	70.31	13.71	10.28	10.11	0.61	5.10	0.83
1	3663831	3663832	DER_site	2	+	0.65	27.20	5.27	2.40	10.78	0.29	5.73	0.77
1	3766823	3766824	DER_site	5	-	2.88	41.27	7.63	4.55	10.39	0.58	7.02	0.64
1	3821625	3821626	DER_site	2	-	2.53	24.37	5.29	2.42	4.63	0.59	4.16	0.65
1	3821626	3821627	DER_site	1	-	3.40	19.24	4.18	1.44	2.51	0.47	5.31	0.51
1	3848935	3848936	DER_site	3	+	0.81	30.31	5.93	2.99	9.54	0.39	11.16	0.27
1	3848936	3848937	DER_site	17	+	2.18	98.08	20.40	16.71	5.34	0.80	12.46	0.19
1	3848937	3848938	DER_site	9	+	2.01	61.56	12.56	9.18	2.71	0.44	7.30	0.61
1	3848938	3848939	DER_site	2	+	1.37	24.99	4.30	1.54	6.06	0.42	12.67	0.18
1	3848939	3848940	DER_site	5	+	1.63	42.08	8.41	5.27	8.34	0.21	11.89	0.22
1	3849089	3849090	DER_site	5	+	1.72	42.33	7.85	4.75	5.82	0.76	14.97	0.24
1	3849090	3849091	DER_site	11	+	2.53	71.84	14.76	11.28	4.79	0.57	6.96	0.64
1	3849095	3849096	DER_site	2	+	1.75	26.41	4.58	1.79	4.79	0.85	11.98	0.45
1	3863867	3863868	DER_site	5	+	1.75	38.66	7.69	4.60	13.74	0.03	7.39	0.60
1	3863890	3863891	DER_site	6	+	1.93	48.63	9.16	5.97	3.56	0.74	14.52	0.27
1	3863892	3863893	DER_site	15	+	3.00	91.84	18.27	14.66	13.06	0.36	6.17	0.91
1	3863893	3863894	DER_site	1	+	1.03	24.25	4.15	1.41	5.85	0.44	14.98	0.24
1	3863899	3863900	DER_site	3	+	1.81	31.16	6.11	3.15	9.63	0.14	8.12	0.52
1	3863901	3863902	DER_site	8	+	1.97	49.98	10.85	7.56	7.28	0.30	8.39	0.21
1	3863902	3863903	DER_site	2	+	1.63	26.36	5.10	2.24	8.73	0.46	10.78	0.29
1	3864316	3864317	DER_site	3	-	3.55	32.75	6.44	3.46	8.24	0.22	7.66	0.57
1	3917984	3917985	DER_site	3	+	1.22	35.61	6.46	3.47	10.33	0.59	1.56	1.00
1	3917985	3917986	DER_site	2	+	1.08	29.76	5.26	2.39	8.50	0.48	4.45	0.97
1	3917986	3917987	DER_site	1	+	1.14	21.82	4.15	1.41	1.68	0.95	6.49	0.69
1	3917988	3917989	DER_site	1	+	1.02	24.71	4.24	1.49	11.07	0.52	12.55	0.40
1	3917989	3917990	DER_site	32	+	2.50	175.82	36.23	32.18	11.06	0.52	7.06	0.85
1	3917990	3917991	DER_site	3	+	1.19	32.93	5.91	2.97	8.90	0.71	8.39	0.75
1	3918028	3918029	DER_site	10	+	1.10	68.80	13.39	9.97	17.36	0.04	21.73	0.04
1	3918029	3918030	DER_site	3	+	0.68	28.51	5.55	2.65	3.56	0.94	6.18	0.72
1	3918032	3918033	DER_site	2	+	1.14	23.74	4.55	1.76	6.48	0.69	6.32	0.71
1	3918033	3918034	DER_site	10	+	1.26	65.30	13.36	9.95	12.75	0.17	4.22	0.90
1	3918037	3918038	DER_site	58	+	2.62	297.78	62.49	58.05	11.34	0.50	7.82	0.80
1	3918038	3918039	DER_site	7	+	1.66	55.10	10.51	7.24	14.50	0.27	5.70	0.93
1	3918039	3918040	DER_site	10	+	1.46	66.77	12.96	9.56	18.56	0.10	9.35	0.67
1	3918040	3918041	DER_site	8	+	1.91	54.91	11.14	7.84	10.36	0.11	6.42	0.70
1	3918041	3918042	DER_site	16	+	1.52	96.89	19.35	15.70	13.07	0.36	17.35	0.14
1	3918083	3918084	DER_site	4	+	1.39	37.45	6.84	3.82	10.20	0.60	13.79	0.31
1	3918086	3918087	DER_site	2	+	1.04	27.52	5.34	2.46	14.04	0.12	3.99	0.91
1	3918087	3918088	DER_site	28	+	2.00	151.50	31.90	27.94	9.99	0.35	9.24	0.42
1	3918088	3918089	DER_site	2	+	1.42	22.91	4.37	1.61	5.82	0.76	3.31	0.95
1	3918089	3918090	DER_site	17	+	1.60	98.15	20.41	16.73	2.47	0.87	6.87	0.65
1	3918091	3918092	DER_site	5	+	1.40	43.55	8.10	4.98	2.33	0.99	9.93	0.62
1	3940675	3940676	DER_site	4	+	3.26	38.04	6.96	3.93	7.57	0.58	13.14	0.36
1	3940693	3940694	DER_site	5	+	1.86	38.71	7.70	4.61	9.79	0.37	4.65	0.86
1	3940694	3940695	DER_site	6	+	2.45	46.75	8.76	5.60	3.22	0.36	11.83	0.46
1	3940695	3940696	DER_site	4	+	1.89	34.92	6.90	3.88	5.71	0.46	13.95	0.12
1	3940696	3940697	DER_site	5	+	1.83	42.27	7.83	4.74	14.42	0.11	11.67	0.47
1	3940697	3940698	DER_site	2	+	1.55	29.98	5.31	2.43	12.67	0.18	9.69	0.64
1	3940716	3940717	DER_site	10	+	2.62	69.72	13.59	10.16	6.59	0.68	9.64	0.65
1	3956903	3956904	DER_site	4	+	3.34	37.49	6.84	3.83	7.82	0.55	10.00	0.35
1	3956957	3956958	DER_site	3	+	2.51	27.88	6.05	3.11	7.48	0.28	4.22	0.65
1	3956979	3956980	DER_site	6	+	3.84	45.52	9.14	5.96	4.37	0.63	4.54	0.87
1	3969620	3969621	DER_site	4	+	1.50	36.82	6.71	3.70	4.36	0.89	8.10	0.78
1	3969621	3969622	DER_site	2	+	1.15	28.46	5.00	2.16	8.17	0.77	9.42	0.67
1	3969623	3969624	DER_site	6	+	0.64	46.25	8.66	5.51	15.24	0.23	10.18	0.60
1	3969667	3969668	DER_site	15	+	2.17	90.43	18.75	15.12	12.99	0.16	4.19	0.90
1	3969671	3969672	DER_site	5	+	1.83	42.12	7.80	4.71	12.42	0.41	12.62	0.18
1	3969685	3969686	DER_site	7	+	1.64	49.13	9.91	6.68	4.89	0.56	3.88	0.92
1	3969688	3969689	DER_site	1	+	1.48	23.90	4.08	1.35	6.46	0.37	13.48	0.33
1	3969791	3969792	DER_site	2	-	3.16	22.41	4.27	1.52	6.37	0.38	7.73	0.56
1	3991092	3991093	DER_site	13	-	2.94	80.70	16.66	13.11	4.74	0.86	7.02	0.64
1	3997586	3997587	DER_site	4	+	1.05	37.72	6.89	3.87	14.54	0.27	10.94	0.53
1	3997587	3997588	DER_site	4	+	2.10	39.52	7.26	4.21	6.17	0.72	11.17	0.51
1	3997589	3997590	DER_site	4	+	1.75	37.34	6.81	3.80	10.42	0.58	11.72	0.47
1	3997682	3997683	DER_site	4	+	1.03	37.58	6.86	3.84	7.44	0.59	11.89	0.45
1	3997683	3997684	DER_site	5	+	1.54	43.38	8.06	4.95	7.80	0.55	5.54	0.94
1	3997688	3997689	DER_site	4	+	1.07	37.03	6.75	3.74	14.60	0.26	4.14	0.98
1	3997701	3997702	DER_site	17	+	2.49	102.00	20.43	16.75	9.63	0.65	8.35	0.76
1	4003268	4003269	DER_site	17	+	2.19	101.58	20.34	16.66	22.00	0.04	7.06	0.85
1	4003290	4003291	DER_site	2	+	1.32	26.17	4.53	1.75	11.40	0.25	8.46	0.75
1	4003291	4003292	DER_site	3	+	0.95	31.41	5.60	2.69	13.60	0.33	15.90	0.20
1	4003294	4003295	DER_site	40	+	2.52	213.87	44.41	40.24	9.73	0.64	12.95	0.37
1	4003295	4003296	DER_site	14	+	1.26	87.17	17.28	13.70	16.71	0.16	12.03	0.44
1	4003334	4003335	DER_site	5	+	0.88	43.92	8.18	5.05	12.81	0.38	17.19	0.14
1	4003340	4003341	DER_site	6	+	0.88	47.79	8.98	5.80	13.01	0.37	23.91	0.02
1	4013041	4013042	DER_site	1	+	3.58	19.53	4.24	1.49	2.14	0.54	3.89	0.69
1	4016837	4016838	DER_site	4	-	2.04	38.86	7.13	4.09	3.51	0.74	7.36	0.60
1	4016900	4016901	DER_site	35	-	1.56	184.50	39.03	34.93	20.63	0.01	11.17	0.26
1	4016901	4016902	DER_site	7	-	1.21	50.47	10.20	6.94	3.25	0.78	10.53	0.31
1	4016906	4016907	DER_site	3	-	1.14	32.18	5.76	2.84	6.92	0.86	7.98	0.79
1	4016907	4016908	DER_site	5	-	0.74	41.40	7.65	4.57	7.97	0.79	11.47	0.49
1	4016908	4016909	DER_site	26	-	1.23	144.54	30.40	26.46	12.94	0.17	7.06	0.63
1	4016909	4016910	DER_site	12	-	1.26	78.14	15.37	11.86	24.52	0.02	9.92	0.62
1	4016935	4016936	DER_site	12	-	1.06	77.17	15.16	11.66	15.23	0.23	16.05	0.19
1	4016936	4016937	DER_site	20	-	1.38	119.11	24.08	20.29	10.87	0.54	11.11	0.52
1	4016937	4016938	DER_site	8	-	1.12	58.12	11.14	7.84	6.01	0.92	13.47	0.34
1	4016938	4016939	DER_site	39	-	1.35	207.87	43.12	38.96	9.33	0.67	12.39	0.42
1	4016939	4016940	DER_site	29	-	1.63	160.08	32.85	28.87	16.70	0.16	13.85	0.31
1	4016940	4016941	DER_site	19	-	1.56	112.54	22.68	18.93	11.65	0.47	7.53	0.82
1	4017031	4017032	DER_site	2	-	1.04	25.38	4.89	2.06	6.98	0.64	6.14	0.73
1	4017032	4017033	DER_site	3	-	0.83	32.12	5.74	2.82	9.25	0.68	3.49	0.99
1	4017033	4017034	DER_site	45	-	1.76	237.68	49.53	45.29	7.00	0.86	16.62	0.16
1	4017034	4017035	DER_site	11	-	1.19	75.82	14.87	11.39	25.88	0.01	7.96	0.79
1	4017036	4017037	DER_site	9	-	1.19	59.96	12.22	8.86	13.14	0.16	10.04	0.35
1	4017079	4017080	DER_site	5	-	0.99	43.45	8.08	4.97	24.53	0.02	12.60	0.40
1	4030455	4030456	DER_site	2	+	2.37	22.41	4.27	1.52	8.40	0.21	9.28	0.41
1	4030456	4030457	DER_site	2	+	2.06	23.53	4.51	1.72	10.84	0.29	5.46	0.49
1	4050021	4050022	DER_site	4	-	4.36	34.33	6.77	3.76	2.25	0.52	6.40	0.38
1	4050029	4050030	DER_site	4	-	2.04	32.72	7.10	4.07	0.33	0.96	7.22	0.30
1	4050031	4050032	DER_site	3	-	1.86	27.69	6.01	3.07	2.43	0.88	1.68	0.95
1	4050083	4050084	DER_site	3	-	2.22	31.85	6.25	3.29	9.39	0.40	8.76	0.46
1	4076090	4076091	DER_site	2	+	2.86	20.93	4.55	1.76	6.33	0.10	3.23	0.78
1	4076135	4076136	DER_site	1	+	-0.35	18.61	4.04	1.32	9.20	0.16	3.47	0.75
1	4114834	4114835	DER_site	6	-	2.91	50.77	9.60	6.38	11.52	0.24	7.18	0.85
1	4150738	4150739	DER_site	4	+	2.55	35.51	7.02	3.99	8.93	0.18	8.11	0.52
1	4150767	4150768	DER_site	2	+	0.94	25.00	4.30	1.54	18.71	0.03	4.95	0.84
1	4150771	4150772	DER_site	14	+	2.03	87.14	17.27	13.69	8.79	0.72	14.58	0.27
1	4150772	4150773	DER_site	2	+	1.15	29.06	5.12	2.26	3.72	0.93	10.25	0.59
1	4150777	4150778	DER_site	4	+	2.07	38.21	6.99	3.96	3.51	0.94	8.09	0.78
1	4150782	4150783	DER_site	7	+	1.67	49.40	9.97	6.73	14.75	0.10	11.48	0.24
1	4150841	4150842	DER_site	3	+	1.10	33.81	6.09	3.14	14.04	0.30	7.74	0.56
1	4150875	4150876	DER_site	3	+	1.11	35.31	6.40	3.42	13.65	0.32	9.50	0.66
1	4150876	4150877	DER_site	10	+	1.83	66.61	13.64	10.21	11.06	0.27	4.09	0.91
1	4150890	4150891	DER_site	3	+	2.94	29.77	5.81	2.89	5.21	0.52	7.68	0.57
1	4150893	4150894	DER_site	4	+	3.68	34.90	6.89	3.87	5.69	0.46	6.35	0.70
1	4187453	4187454	DER_site	5	-	2.16	45.42	8.49	5.34	2.00	0.92	5.25	0.95
1	4206259	4206260	DER_site	2	+	1.90	29.29	5.17	2.31	4.09	0.25	7.29	0.84
1	4206302	4206303	DER_site	2	+	2.80	27.10	5.25	2.38	13.94	0.12	6.19	0.72
1	4224988	4224989	DER_site	4	+	-1.40	36.64	6.67	3.67	11.14	0.27	8.80	0.72
1	4224989	4224990	DER_site	3	+	-0.84	35.73	6.48	3.50	8.95	0.71	5.41	0.94
1	4225003	4225004	DER_site	1	+	2.72	23.99	4.10	1.36	8.22	0.51	6.98	0.86
1	4225005	4225006	DER_site	6	+	1.93	48.39	9.11	5.92	6.55	0.68	3.00	1.00
1	4225007	4225008	DER_site	2	+	1.21	29.30	5.17	2.31	17.36	0.14	8.51	0.74
1	4225009	4225010	DER_site	1	+	1.04	24.22	4.14	1.40	8.07	0.53	5.55	0.94
1	4225018	4225019	DER_site	2	+	1.55	25.75	4.97	2.13	6.28	0.39	7.84	0.55
1	4225020	4225021	DER_site	2	+	1.61	28.21	4.95	2.11	13.10	0.36	5.79	0.76
1	4225021	4225022	DER_site	5	+	2.80	41.13	8.21	5.09	9.30	0.41	16.38	0.06
1	4241642	4241643	DER_site	10	-	2.19	64.54	13.20	9.79	6.55	0.36	9.97	0.35
1	4241643	4241644	DER_site	4	-	2.27	35.94	6.53	3.54	13.54	0.14	17.71	0.12
1	4241647	4241648	DER_site	5	-	1.26	45.76	8.56	5.41	8.17	0.77	9.80	0.63
1	4241648	4241649	DER_site	1	-	0.75	23.95	4.09	1.36	15.40	0.08	8.38	0.76
1	4241649	4241650	DER_site	1	-	0.53	23.90	4.08	1.35	6.74	0.66	4.98	0.84
1	4241650	4241651	DER_site	13	-	1.27	83.84	16.57	13.02	12.56	0.40	5.32	0.95
1	4241662	4241663	DER_site	6	-	-1.14	50.08	9.46	6.25	25.64	0.01	16.00	0.19
1	4241663	4241664	DER_site	3	-	-1.13	34.94	6.32	3.35	15.00	0.24	8.68	0.73
1	4267203	4267204	DER_site	2	-	1.59	27.18	5.27	2.40	4.50	0.88	4.56	0.60
1	4285785	4285786	DER_site	2	+	2.67	27.73	4.85	2.02	10.47	0.31	11.91	0.45
1	4307863	4307864	DER_site	2	+	2.96	27.46	4.79	1.98	9.57	0.39	9.45	0.40
1	4307877	4307878	DER_site	3	+	2.74	27.84	5.41	2.52	3.14	0.96	4.52	0.87
1	4350682	4350683	DER_site	8	+	2.83	53.41	10.82	7.54	5.71	0.46	5.96	0.74
1	4353564	4353565	DER_site	5	+	3.07	44.79	8.36	5.22	1.32	0.72	10.20	0.60
1	4353566	4353567	DER_site	4	+	4.36	34.46	6.80	3.79	2.31	0.51	6.31	0.71
1	4353567	4353568	DER_site	7	+	3.55	55.22	10.53	7.26	7.67	0.26	16.04	0.19
1	4361661	4361662	DER_site	3	-	1.49	29.58	5.77	2.85	6.52	0.69	4.39	0.88
1	4361687	4361688	DER_site	2	-	1.09	27.51	4.80	1.98	4.29	0.64	8.76	0.72
1	4361705	4361706	DER_site	10	-	2.77	69.12	13.46	10.04	18.75	0.03	13.21	0.35
1	4361707	4361708	DER_site	4	-	2.52	38.79	7.11	4.07	11.15	0.27	7.17	0.85
1	4368681	4368682	DER_site	2	+	1.98	25.43	4.90	2.07	7.37	0.29	3.36	0.95
1	4368736	4368737	DER_site	1	+	2.84	19.27	4.18	1.44	0.85	0.84	8.61	0.20
1	4378297	4378298	DER_site	14	+	1.31	87.37	17.32	13.74	5.51	0.79	15.69	0.21
1	4378359	4378360	DER_site	13	+	2.64	84.30	16.67	13.11	9.11	0.43	7.65	0.57
1	4378424	4378425	DER_site	4	+	1.26	38.45	7.04	4.01	8.35	0.76	12.97	0.37
1	4378426	4378427	DER_site	12	+	1.91	77.81	15.30	11.79	8.74	0.46	16.88	0.15
1	4378435	4378436	DER_site	1	+	0.85	24.17	4.13	1.40	9.63	0.38	11.81	0.46
1	4378467	4378468	DER_site	2	+	2.21	29.86	5.28	2.41	8.22	0.51	6.15	0.91
1	4378468	4378469	DER_site	24	+	3.28	137.14	27.94	24.06	7.65	0.81	10.85	0.54
1	4378470	4378471	DER_site	4	+	1.65	39.97	7.36	4.30	8.78	0.72	9.33	0.67
1	4378471	4378472	DER_site	2	+	1.53	29.23	5.15	2.30	7.56	0.58	5.80	0.93
1	4379842	4379843	DER_site	2	-	3.81	22.41	4.87	2.04	2.10	0.55	0.25	0.97
1	4379843	4379844	DER_site	2	-	3.82	23.90	5.19	2.33	1.62	0.66	1.96	0.92
1	4392497	4392498	DER_site	8	-	-1.14	53.76	10.90	7.61	5.36	0.50	9.28	0.41
1	4392498	4392499	DER_site	6	-	0.01	43.25	8.66	5.51	10.65	0.30	12.36	0.19
1	4392499	4392500	DER_site	4	-	1.66	37.13	7.36	4.30	18.42	0.03	10.06	0.35
1	4392500	4392501	DER_site	7	-	2.04	51.91	9.84	6.61	15.34	0.08	17.92	0.12
1	4392501	4392502	DER_site	5	-	0.38	41.55	7.69	4.60	6.35	0.90	6.81	0.66
1	4392502	4392503	DER_site	19	-	4.06	110.82	22.31	18.58	7.75	0.56	8.60	0.74
1	4392503	4392504	DER_site	13	-	2.05	84.55	16.72	13.16	10.87	0.28	8.98	0.70
1	4392504	4392505	DER_site	31	-	4.34	165.89	35.01	30.98	6.94	0.33	11.78	0.23
1	4392505	4392506	DER_site	20	-	4.78	118.11	23.87	20.08	5.07	0.53	12.04	0.44
1	4392506	4392507	DER_site	28	-	3.66	154.82	31.72	27.76	14.26	0.28	15.45	0.22
1	4392507	4392508	DER_site	1	-	0.76	23.86	4.07	1.34	14.44	0.11	5.58	0.94
1	4392515	4392516	DER_site	28	-	0.79	157.21	32.24	28.26	7.66	0.57	5.33	0.95
1	4392516	4392517	DER_site	6	-	0.84	51.02	9.66	6.43	5.38	0.94	12.90	0.38
1	4395011	4395012	DER_site	3	-	3.55	35.43	6.42	3.44	5.98	0.43	7.82	0.80
1	4396381	4396382	DER_site	17	-	4.06	104.16	20.89	17.20	10.46	0.58	15.43	0.22
1	4396407	4396408	DER_site	4	-	2.26	37.43	6.83	3.82	12.25	0.43	3.11	0.96
1	4396409	4396410	DER_site	11	-	2.23	68.99	14.15	10.70	3.87	0.69	7.62	0.57
1	4396423	4396424	DER_site	4	-	2.92	36.66	6.67	3.67	3.01	0.81	8.40	0.75
1	4396425	4396426	DER_site	2	-	2.09	20.07	4.36	1.59	6.35	0.39	6.52	0.37
1	4396426	4396427	DER_site	2	-	3.41	25.38	4.37	1.61	3.39	0.76	15.21	0.23
1	4396440	4396441	DER_site	3	-	1.58	35.33	6.40	3.42	8.17	0.52	7.51	0.82
1	4454757	4454758	DER_site	6	+	1.93	47.92	9.65	6.43	2.81	0.97	7.26	0.61
1	4454776	4454777	DER_site	3	+	1.74	32.23	5.76	2.84	7.45	0.59	16.98	0.15
1	4454777	4454778	DER_site	3	+	2.09	31.15	5.55	2.65	7.53	0.58	13.23	0.35
1	4454778	4454779	DER_site	6	+	2.08	43.21	9.38	6.18	5.26	0.51	3.22	0.78
1	4454791	4454792	DER_site	14	+	2.24	83.97	17.36	13.78	7.54	0.58	8.00	0.53
1	4454806	4454807	DER_site	4	+	1.66	35.18	6.95	3.93	2.51	0.47	4.75	0.86
1	4501508	4501509	DER_site	3	+	3.46	26.18	5.69	2.77	3.01	0.81	1.24	0.74
1	4547237	4547238	DER_site	2	+	2.75	29.13	5.13	2.28	5.37	0.50	14.66	0.26
1	4563592	4563593	DER_site	6	-	2.32	46.63	8.74	5.58	13.53	0.33	5.52	0.94
1	4563595	4563596	DER_site	2	-	1.39	26.26	4.55	1.76	13.09	0.36	6.26	0.90
1	4563597	4563598	DER_site	2	-	1.25	27.93	4.89	2.06	8.31	0.76	8.10	0.78
1	4563598	4563599	DER_site	3	-	1.09	32.60	5.84	2.91	13.45	0.34	4.73	0.97
1	4563605	4563606	DER_site	6	-	2.40	45.66	9.17	5.98	7.73	0.56	8.68	0.47
1	4563606	4563607	DER_site	4	-	2.17	40.50	7.47	4.40	7.48	0.59	9.30	0.68
1	4563607	4563608	DER_site	1	-	1.56	18.90	4.11	1.37	4.97	0.55	6.61	0.36
1	4563608	4563609	DER_site	5	-	2.14	42.61	7.90	4.80	7.94	0.54	8.42	0.49
1	4572455	4572456	DER_site	1	-	2.82	23.81	4.06	1.33	10.00	0.62	5.65	0.46
1	4589142	4589143	DER_site	7	-	2.25	51.98	9.86	6.62	9.92	0.13	15.30	0.23
1	4589158	4589159	DER_site	4	-	3.34	39.90	7.34	4.28	12.59	0.40	11.39	0.25
1	4608286	4608287	DER_site	10	-	0.74	66.61	12.93	9.53	22.48	0.03	16.32	0.18
1	4608287	4608288	DER_site	24	-	1.16	136.95	27.90	24.02	53.13	0.00	22.10	0.04
1	4608288	4608289	DER_site	13	-	1.43	84.74	16.76	13.20	29.12	0.00	17.21	0.14
1	4608289	4608290	DER_site	89	-	1.64	441.38	93.50	88.77	24.54	0.00	19.41	0.08
1	4608290	4608291	DER_site	7	-	1.38	55.76	10.65	7.37	15.19	0.09	9.59	0.65
1	4608291	4608292	DER_site	6	-	1.94	51.09	9.67	6.45	14.64	0.10	9.40	0.67
1	4608390	4608391	DER_site	12	-	0.53	76.41	15.00	11.51	34.63	0.00	21.05	0.05
1	4608391	4608392	DER_site	7	-	0.39	52.21	9.90	6.67	20.52	0.06	10.65	0.56
1	4608392	4608393	DER_site	52	-	1.49	268.01	56.07	51.72	19.53	0.02	15.42	0.22
1	4608393	4608394	DER_site	67	-	1.03	339.16	71.42	66.88	12.28	0.42	8.31	0.50
1	4608394	4608395	DER_site	1	-	0.66	23.73	4.04	1.32	11.12	0.52	6.94	0.64
1	4638676	4638677	DER_site	1	-	2.51	24.67	4.23	1.48	7.22	0.30	7.69	0.81
1	4638693	4638694	DER_site	4	-	1.83	37.17	6.78	3.77	15.36	0.22	4.04	0.91
1	4638694	4638695	DER_site	3	-	2.10	30.63	5.44	2.55	12.85	0.38	10.48	0.57
1	4638738	4638739	DER_site	7	-	2.10	55.42	10.58	7.30	13.95	0.12	8.05	0.78
1	4694294	4694295	DER_site	3	+	4.50	25.32	5.50	2.60	1.59	0.66	4.94	0.55
1	4712374	4712375	DER_site	4	+	3.03	34.44	6.80	3.78	3.20	0.78	1.52	1.00
1	4737581	4737582	DER_site	1	+	1.18	24.20	4.14	1.40	11.04	0.53	6.63	0.68
1	4737692	4737693	DER_site	3	+	1.94	29.33	5.72	2.80	3.74	0.29	7.02	0.63
1	4737740	4737741	DER_site	1	+	1.63	24.13	4.12	1.39	5.25	0.95	5.57	0.78
1	4737747	4737748	DER_site	3	+	2.46	31.87	5.69	2.78	3.83	0.70	6.25	0.90
1	4737799	4737800	DER_site	2	+	2.47	26.20	5.06	2.21	9.11	0.17	7.39	0.60
1	4747374	4747375	DER_site	2	-	3.17	29.83	5.28	2.40	3.07	0.80	8.32	0.76
1	4779231	4779232	DER_site	2	+	2.37	22.51	4.29	1.53	6.31	0.39	2.60	0.98
1	4794524	4794525	DER_site	1	+	2.74	24.46	4.19	1.45	14.07	0.30	8.57	0.74
1	4796528	4796529	DER_site	2	+	2.40	25.09	4.83	2.01	11.33	0.25	8.74	0.46
1	4796533	4796534	DER_site	3	+	2.47	29.50	6.41	3.42	2.57	0.86	8.90	0.18
1	4800142	4800143	DER_site	3	+	2.29	30.36	5.94	3.00	6.59	0.36	6.55	0.68
1	4800343	4800344	DER_site	1	-	2.05	22.01	4.19	1.44	10.82	0.29	5.84	0.76
1	4805405	4805406	DER_site	1	-	2.18	24.01	4.10	1.37	2.57	0.98	16.82	0.16
1	4840681	4840682	DER_site	13	+	2.61	83.50	16.50	12.95	12.56	0.40	9.56	0.65
1	4840683	4840684	DER_site	13	+	2.93	81.71	16.12	12.59	4.13	0.90	7.93	0.79
1	4840684	4840685	DER_site	3	+	1.97	34.93	6.32	3.35	6.61	0.36	6.90	0.86
1	4840685	4840686	DER_site	5	+	1.97	42.66	7.92	4.81	4.68	0.86	10.62	0.56
1	4840713	4840714	DER_site	5	+	2.63	38.49	7.65	4.57	6.57	0.36	7.90	0.54
1	4875003	4875004	DER_site	7	-	4.83	42.84	10.23	6.97	4.04	0.26	0.52	0.91
1	4889516	4889517	DER_site	6	+	1.33	46.66	8.75	5.58	7.55	0.82	12.03	0.44
1	4889517	4889518	DER_site	190	+	2.66	910.18	194.98	189.53	14.58	0.27	9.35	0.67
1	4889518	4889519	DER_site	30	+	1.16	165.67	34.05	30.04	15.82	0.20	13.88	0.31
1	4889519	4889520	DER_site	39	+	1.35	206.03	42.72	38.58	8.91	0.71	13.86	0.31
1	4889536	4889537	DER_site	32	+	1.06	176.01	36.27	32.22	52.98	0.00	17.93	0.12
1	4889538	4889539	DER_site	11	+	-0.72	73.25	14.33	10.87	11.75	0.47	15.94	0.19
1	4889539	4889540	DER_site	11	+	-0.68	73.27	14.33	10.87	21.31	0.05	10.48	0.57
1	4889540	4889541	DER_site	6	+	-0.37	48.31	9.09	5.90	11.05	0.52	29.05	0.00
1	4889541	4889542	DER_site	16	+	0.44	98.85	19.76	16.10	33.72	0.00	15.74	0.20
1	4889544	4889545	DER_site	7	+	0.70	55.89	10.68	7.40	14.02	0.30	6.88	0.87
1	4889545	4889546	DER_site	24	+	2.60	136.67	27.84	23.96	8.24	0.51	11.65	0.47
1	4889546	4889547	DER_site	111	+	2.90	543.73	115.63	110.74	20.03	0.07	16.05	0.19
1	4889547	4889548	DER_site	39	+	1.40	209.91	43.56	39.40	24.06	0.02	7.80	0.80
1	4889548	4889549	DER_site	8	+	-0.17	57.55	11.02	7.72	10.17	0.60	5.12	0.95
1	4889549	4889550	DER_site	50	+	0.86	257.67	53.84	49.53	13.97	0.30	16.47	0.17
1	4889550	4889551	DER_site	59	+	-1.53	301.06	63.19	58.75	15.27	0.23	8.88	0.71
1	4889551	4889552	DER_site	2	+	-0.42	29.54	5.22	2.35	12.23	0.43	10.47	0.57
1	4889552	4889553	DER_site	4	+	-0.71	38.84	7.12	4.08	15.16	0.23	23.31	0.03
1	4889572	4889573	DER_site	10	+	0.20	71.12	13.88	10.44	14.33	0.11	13.45	0.34
1	4889581	4889582	DER_site	2	+	-0.64	26.55	4.61	1.81	14.71	0.26	7.68	0.57
1	4899879	4899880	DER_site	3	+	1.80	32.82	5.89	2.95	9.63	0.65	13.87	0.31
1	4899880	4899881	DER_site	3	+	1.89	34.89	6.31	3.34	3.67	0.93	7.78	0.80
1	4918097	4918098	DER_site	5	-	2.69	41.57	7.69	4.60	13.40	0.34	9.98	0.62
1	4918099	4918100	DER_site	1	-	2.36	18.64	4.05	1.32	2.79	0.42	1.37	0.97
1	4927119	4927120	DER_site	4	-	2.27	34.08	6.72	3.71	5.88	0.75	11.95	0.22
1	4927128	4927129	DER_site	2	-	1.37	23.26	4.45	1.67	3.97	0.91	8.22	0.51
1	4927129	4927130	DER_site	14	-	2.38	85.14	17.62	14.02	6.64	0.67	7.37	0.60
1	4927131	4927132	DER_site	5	-	2.92	42.56	7.89	4.79	4.61	0.87	12.38	0.42
1	4927141	4927142	DER_site	10	-	1.80	64.02	13.09	9.68	3.19	0.96	6.01	0.74
1	4927146	4927147	DER_site	4	-	1.34	38.06	6.96	3.93	11.40	0.25	16.31	0.18
1	4927158	4927159	DER_site	12	-	1.72	76.42	15.75	12.23	6.36	0.38	8.29	0.50
1	4927193	4927194	DER_site	9	-	1.77	61.63	12.58	9.20	7.68	0.57	12.40	0.19
1	4927235	4927236	DER_site	1	-	1.89	23.84	4.07	1.34	9.64	0.38	6.35	0.90
1	4946317	4946318	DER_site	15	-	4.70	91.31	18.94	15.30	1.70	0.64	6.73	0.66
1	4946320	4946321	DER_site	2	-	1.10	24.63	4.73	1.92	5.69	0.46	13.54	0.14
1	4946386	4946387	DER_site	6	-	3.81	46.55	9.36	6.16	5.67	0.46	10.60	0.30
1	4946395	4946396	DER_site	2	-	1.51	29.02	5.11	2.26	3.80	0.70	11.65	0.47
1	4961939	4961940	DER_site	2	-	1.14	22.56	4.30	1.54	7.04	0.63	3.57	0.94
1	4961964	4961965	DER_site	2	-	2.60	27.07	5.24	2.38	4.14	0.66	10.96	0.28
1	4961965	4961966	DER_site	5	-	2.22	42.48	7.88	4.78	8.72	0.73	16.84	0.16
1	4961966	4961967	DER_site	7	-	2.52	56.06	10.71	7.43	4.41	0.88	9.18	0.69
1	4987253	4987254	DER_site	2	+	2.71	24.08	5.23	2.36	7.26	0.30	6.88	0.33
1	4987272	4987273	DER_site	2	+	1.08	23.95	4.59	1.80	3.63	0.93	2.30	0.89
1	4987273	4987274	DER_site	3	+	1.79	31.59	6.20	3.23	3.93	0.92	2.65	0.98
1	4987278	4987279	DER_site	5	+	2.09	41.62	8.32	5.18	19.01	0.03	4.37	0.89
1	4987280	4987281	DER_site	13	+	3.06	83.47	16.49	12.94	6.67	0.67	14.59	0.26
1	4987281	4987282	DER_site	5	+	2.09	44.06	8.21	5.08	14.66	0.26	4.26	0.98
1	4987282	4987283	DER_site	8	+	-2.43	53.04	11.52	8.19	2.23	0.90	5.66	0.46
1	4987283	4987284	DER_site	6	+	-2.00	46.30	8.67	5.51	12.16	0.43	9.91	0.62
1	4987284	4987285	DER_site	4	+	-1.96	40.92	7.55	4.48	8.41	0.75	10.45	0.58
1	4987301	4987302	DER_site	1	+	1.56	22.25	4.24	1.49	15.34	0.02	3.77	0.93
1	4987304	4987305	DER_site	3	+	1.43	29.54	5.76	2.84	4.79	0.85	5.70	0.77
1	4987307	4987308	DER_site	1	+	1.26	21.84	4.15	1.41	3.62	0.93	6.99	0.64
1	4992569	4992570	DER_site	2	+	1.65	27.01	4.70	1.90	14.16	0.29	6.54	0.89
1	4992571	4992572	DER_site	5	+	2.11	44.55	8.31	5.17	5.68	0.46	10.52	0.57
1	4992587	4992588	DER_site	4	+	1.51	36.15	6.57	3.57	17.37	0.14	11.24	0.51
1	4992603	4992604	DER_site	2	+	0.72	22.45	4.28	1.52	6.72	0.67	6.43	0.70
1	5008312	5008313	DER_site	3	-	2.44	29.01	5.65	2.74	4.72	0.58	15.80	0.07
1	5008322	5008323	DER_site	14	-	4.18	90.35	17.96	14.35	6.44	0.70	19.22	0.08
1	5008420	5008421	DER_site	9	-	2.60	61.94	12.65	9.26	8.61	0.47	7.05	0.63
1	5040316	5040317	DER_site	2	+	0.94	27.13	4.73	1.92	4.95	0.84	10.60	0.56
1	5040317	5040318	DER_site	15	+	2.44	91.26	18.15	14.54	14.55	0.27	8.59	0.74
1	5040318	5040319	DER_site	19	+	3.32	111.29	22.41	18.68	7.05	0.63	8.94	0.71
1	5040320	5040321	DER_site	5	+	2.35	44.82	8.36	5.23	5.83	0.76	11.39	0.50
1	5040459	5040460	DER_site	15	+	2.20	92.13	18.33	14.72	11.85	0.46	7.55	0.82
1	5040468	5040469	DER_site	6	+	1.94	46.47	8.71	5.55	14.00	0.12	11.41	0.49
1	5051927	5051928	DER_site	4	-	3.68	37.57	7.46	4.39	8.53	0.48	3.94	0.92
1	5061048	5061049	DER_site	3	+	2.95	32.11	5.74	2.82	10.77	0.29	11.30	0.50
1	5066732	5066733	DER_site	1	-	2.38	23.83	4.06	1.34	11.78	0.46	8.44	0.75
1	5102567	5102568	DER_site	7	-	2.49	51.52	9.76	6.53	12.33	0.42	12.84	0.38
1	5102568	5102569	DER_site	2	-	2.71	29.30	5.17	2.31	7.40	0.60	13.49	0.33
1	5102608	5102609	DER_site	4	-	2.07	36.47	7.23	4.18	11.52	0.07	11.31	0.26
1	5102609	5102610	DER_site	4	-	1.90	40.12	7.39	4.33	6.22	0.90	7.65	0.81
1	5102617	5102618	DER_site	12	-	4.09	70.31	15.27	11.77	0.08	0.99	4.62	0.59
1	5102618	5102619	DER_site	3	-	5.52	31.25	6.12	3.17	0.00	1.00	4.57	0.87
1	5102622	5102623	DER_site	1	-	0.16	24.19	4.14	1.40	11.02	0.27	11.41	0.49
1	5107502	5107503	DER_site	7	-	3.16	53.03	10.74	7.46	6.12	0.73	7.88	0.55
1	5107643	5107644	DER_site	3	-	1.45	35.06	6.35	3.37	6.64	0.36	10.42	0.58
1	5165775	5165776	DER_site	1	-	1.13	23.98	4.09	1.36	8.67	0.47	5.07	0.83
1	5165776	5165777	DER_site	5	-	1.54	42.00	7.78	4.69	7.13	0.62	5.03	0.96
1	5165791	5165792	DER_site	5	-	1.60	43.34	8.05	4.94	13.40	0.34	2.75	0.97
1	5165827	5165828	DER_site	3	-	1.75	32.28	6.34	3.37	23.01	0.01	9.01	0.44
1	5165828	5165829	DER_site	19	-	2.21	111.52	22.46	18.72	13.72	0.32	8.54	0.74
1	5165829	5165830	DER_site	3	-	0.92	31.33	5.58	2.68	6.89	0.65	6.18	0.91
1	5165830	5165831	DER_site	3	-	1.27	31.48	5.61	2.70	8.41	0.75	9.27	0.68
1	5179948	5179949	DER_site	2	+	1.63	20.16	4.38	1.61	1.69	0.64	5.39	0.50
1	5180015	5180016	DER_site	5	+	3.19	38.46	7.65	4.56	5.98	0.74	5.46	0.79
1	5203974	5203975	DER_site	9	+	2.01	64.68	12.52	9.14	7.97	0.79	4.44	0.88
1	5203977	5203978	DER_site	2	+	1.21	26.42	4.58	1.79	7.38	0.60	14.14	0.29
1	5203980	5203981	DER_site	1	+	1.05	24.29	4.16	1.42	3.90	0.69	6.41	0.89
1	5203995	5203996	DER_site	7	+	1.32	54.86	10.46	7.19	5.96	0.92	10.05	0.61
1	5203996	5203997	DER_site	2	+	1.29	28.02	4.91	2.08	3.46	0.94	8.13	0.77
1	5203997	5203998	DER_site	5	+	1.50	44.09	8.21	5.09	7.67	0.81	10.65	0.56
1	5203998	5203999	DER_site	2	+	0.88	28.49	5.00	2.16	5.35	0.80	14.30	0.28
1	5204000	5204001	DER_site	5	+	1.78	40.82	8.15	5.03	3.76	0.71	11.21	0.26
1	5204003	5204004	DER_site	8	+	2.71	61.34	11.82	8.48	12.93	0.17	4.13	0.90
1	5206090	5206091	DER_site	4	-	3.96	34.93	6.90	3.88	4.01	0.26	10.17	0.34
1	5206131	5206132	DER_site	7	-	2.62	53.49	10.17	6.92	9.39	0.40	8.08	0.78
1	5210294	5210295	DER_site	2	-	2.29	24.49	4.70	1.90	2.59	0.46	7.93	0.54
1	5210300	5210301	DER_site	1	-	1.44	24.66	4.23	1.48	5.28	0.81	5.48	0.94
1	5210307	5210308	DER_site	3	-	-1.45	30.71	6.01	3.06	9.08	0.43	6.72	0.67
1	5210410	5210411	DER_site	3	-	2.58	28.50	5.54	2.64	8.05	0.23	6.93	0.64
1	5226650	5226651	DER_site	11	+	2.86	74.43	14.58	11.11	7.90	0.54	11.10	0.52
1	5250728	5250729	DER_site	2	-	1.01	28.99	5.10	2.25	10.76	0.29	16.01	0.19
1	5250753	5250754	DER_site	2	-	0.79	28.22	4.95	2.11	13.46	0.34	8.78	0.72
1	5250773	5250774	DER_site	18	-	3.05	106.07	21.30	17.59	7.61	0.81	6.15	0.91
1	5250776	5250777	DER_site	5	-	1.12	45.56	8.52	5.37	7.06	0.63	14.45	0.27
1	5250779	5250780	DER_site	13	-	1.65	82.87	16.37	12.82	10.43	0.58	11.48	0.49
1	5250780	5250781	DER_site	16	-	1.66	99.46	19.89	16.22	7.14	0.85	8.12	0.78
1	5250781	5250782	DER_site	6	-	1.43	47.33	8.89	5.71	5.83	0.92	17.37	0.14
1	5256594	5256595	DER_site	2	+	2.14	28.15	4.94	2.10	5.63	0.78	11.73	0.47
1	5256608	5256609	DER_site	2	+	1.65	25.83	4.47	1.69	8.90	0.71	8.04	0.53
1	5256651	5256652	DER_site	1	+	3.07	22.25	4.24	1.49	3.46	0.75	8.16	0.52
1	5275727	5275728	DER_site	2	-	2.23	28.50	5.01	2.16	3.19	0.78	11.41	0.49
1	5275728	5275729	DER_site	6	-	2.49	48.16	9.06	5.88	5.93	0.92	7.30	0.61
1	5275794	5275795	DER_site	7	-	1.94	52.78	10.69	7.41	11.41	0.25	8.93	0.44
1	5275795	5275796	DER_site	2	-	2.34	25.69	4.44	1.66	3.34	0.77	17.05	0.15
1	5275797	5275798	DER_site	3	-	1.62	32.87	6.46	3.48	12.94	0.17	16.06	0.07
1	5276485	5276486	DER_site	2	-	-2.33	20.38	4.43	1.65	8.54	0.20	0.31	0.96
1	5278347	5278348	DER_site	2	-	2.48	26.19	5.06	2.21	9.33	0.41	12.56	0.18
1	5288453	5288454	DER_site	5	+	3.77	41.97	8.39	5.25	5.45	0.14	5.88	0.75
1	5292369	5292370	DER_site	2	+	0.91	22.45	4.28	1.52	4.71	0.58	14.53	0.10
1	5295671	5295672	DER_site	1	+	1.86	19.25	4.18	1.44	3.36	0.76	3.07	0.80
1	5295715	5295716	DER_site	2	+	2.01	20.38	5.20	2.33	5.16	0.16	0.26	0.97
1	5296269	5296270	DER_site	3	-	2.58	28.58	5.56	2.66	15.57	0.02	5.08	0.83
1	5296271	5296272	DER_site	5	-	2.43	41.65	8.32	5.19	4.26	0.64	8.95	0.44
1	5296301	5296302	DER_site	6	-	1.84	44.38	8.90	5.73	9.57	0.39	8.50	0.48
1	5301662	5301663	DER_site	2	-	2.72	26.40	4.58	1.79	8.59	0.48	3.26	0.78
1	5306102	5306103	DER_site	3	-	3.11	27.61	5.99	3.05	7.56	0.27	2.58	0.46
1	5328686	5328687	DER_site	7	+	1.38	51.41	9.74	6.51	12.19	0.43	9.69	0.64
1	5328715	5328716	DER_site	3	+	1.67	29.02	5.65	2.74	12.92	0.17	11.47	0.25
1	5328769	5328770	DER_site	3	+	2.11	28.21	5.48	2.59	3.47	0.75	10.72	0.30
1	5328770	5328771	DER_site	11	+	1.93	71.80	14.02	10.58	12.42	0.19	13.51	0.33
1	5328771	5328772	DER_site	19	+	2.32	110.89	22.33	18.59	20.72	0.01	8.24	0.77
1	5328772	5328773	DER_site	3	+	1.91	32.52	5.82	2.90	6.03	0.91	7.36	0.83
1	5328773	5328774	DER_site	16	+	2.00	100.70	20.16	16.48	16.78	0.16	19.00	0.09
1	5328775	5328776	DER_site	3	+	2.82	29.38	5.73	2.81	3.87	0.28	10.14	0.34
1	5328780	5328781	DER_site	3	+	2.12	31.87	6.25	3.29	7.55	0.58	7.36	0.60
1	5328839	5328840	DER_site	14	+	2.51	89.80	17.84	14.24	4.21	0.90	6.74	0.87
1	5328840	5328841	DER_site	2	+	2.34	24.74	4.76	1.94	3.49	0.75	5.93	0.75
1	5402251	5402252	DER_site	4	+	1.92	40.49	7.46	4.40	16.43	0.17	14.98	0.24
1	5402296	5402297	DER_site	3	+	0.89	30.96	5.51	2.61	12.10	0.44	6.54	0.89
1	5402297	5402298	DER_site	7	+	1.88	53.07	10.08	6.84	5.13	0.82	8.97	0.71
1	5402298	5402299	DER_site	4	+	2.02	38.05	6.96	3.93	4.13	0.66	8.17	0.77
1	5402299	5402300	DER_site	18	+	2.11	102.85	21.42	17.71	7.91	0.54	5.75	0.76
1	5402300	5402301	DER_site	26	+	2.07	141.84	29.82	25.89	6.66	0.67	4.32	0.89
1	5402301	5402302	DER_site	16	+	1.68	92.65	19.23	15.58	4.86	0.85	5.43	0.80
1	5402302	5402303	DER_site	16	+	0.50	100.04	20.02	16.35	6.35	0.90	8.14	0.77
1	5402303	5402304	DER_site	11	+	1.62	75.27	14.76	11.28	4.70	0.86	7.20	0.84
1	5402306	5402307	DER_site	4	+	0.50	38.39	7.03	4.00	14.34	0.11	14.38	0.28
1	5402327	5402328	DER_site	3	+	0.97	31.69	5.66	2.75	12.01	0.44	11.92	0.45
1	5402331	5402332	DER_site	4	+	1.11	35.92	6.52	3.53	10.13	0.60	6.17	0.91
1	5402339	5402340	DER_site	2	+	0.88	26.39	4.58	1.79	12.05	0.44	8.79	0.72
1	5402425	5402426	DER_site	5	+	1.57	44.57	8.31	5.18	13.80	0.31	5.57	0.78
1	5402485	5402486	DER_site	4	+	3.12	36.72	6.69	3.68	4.52	0.61	11.32	0.50
1	5402487	5402488	DER_site	1	+	1.08	24.44	4.19	1.44	5.74	0.45	7.08	0.85
1	5407465	5407466	DER_site	1	-	2.73	22.01	4.19	1.44	6.53	0.09	6.71	0.67
1	5407479	5407480	DER_site	2	-	2.37	27.55	5.34	2.47	4.87	0.56	4.57	0.87
1	5407526	5407527	DER_site	11	-	3.28	74.36	14.56	11.09	17.39	0.14	7.79	0.80
1	5414604	5414605	DER_site	10	+	2.85	70.24	13.69	10.26	9.41	0.67	12.40	0.41
1	5414609	5414610	DER_site	5	+	2.25	42.29	8.46	5.31	9.63	0.38	10.16	0.34
1	5414610	5414611	DER_site	3	+	1.92	28.46	5.54	2.64	14.69	0.10	9.38	0.40
1	5414965	5414966	DER_site	2	-	0.90	23.62	4.52	1.74	4.78	0.57	8.75	0.46
1	5414982	5414983	DER_site	1	-	1.88	21.94	4.17	1.43	4.48	0.88	2.86	0.97
1	5414986	5414987	DER_site	2	-	1.67	24.59	4.73	1.91	8.86	0.45	3.62	0.93
1	5414987	5414988	DER_site	26	-	3.13	144.64	29.54	25.62	12.96	0.37	2.26	0.99
1	5414989	5414990	DER_site	3	-	0.77	30.47	5.41	2.52	8.78	0.72	10.36	0.32
1	5414995	5414996	DER_site	1	-	2.35	23.96	4.09	1.36	10.21	0.12	10.52	0.57
1	5414996	5414997	DER_site	16	-	3.49	98.79	19.75	16.09	23.24	0.03	1.40	1.00
1	5414999	5415000	DER_site	7	-	2.90	54.80	10.45	7.18	15.20	0.23	9.70	0.64
1	5415000	5415001	DER_site	5	-	2.67	41.53	7.68	4.59	19.22	0.02	9.56	0.65
1	5415002	5415003	DER_site	2	-	2.63	25.45	4.90	2.07	8.27	0.51	12.13	0.21
1	5446586	5446587	DER_site	10	-	1.11	71.01	13.86	10.42	11.60	0.48	9.15	0.69
1	5446587	5446588	DER_site	4	-	0.14	38.74	7.10	4.06	17.67	0.13	15.03	0.24
1	5446606	5446607	DER_site	12	-	0.68	79.68	15.69	12.17	18.72	0.10	23.00	0.03
1	5446607	5446608	DER_site	51	-	1.07	262.80	54.95	50.62	17.14	0.14	12.00	0.45
1	5446634	5446635	DER_site	9	-	0.44	63.68	12.31	8.94	23.90	0.02	16.04	0.19
1	5446635	5446636	DER_site	7	-	0.70	52.25	9.91	6.68	7.37	0.83	18.91	0.09
1	5456849	5456850	DER_site	2	+	1.95	26.62	5.15	2.29	7.05	0.63	3.49	0.94
1	5456864	5456865	DER_site	3	+	2.30	34.19	6.17	3.21	7.22	0.84	7.74	0.81
1	5458605	5458606	DER_site	3	-	2.05	27.93	5.42	2.54	6.91	0.65	7.54	0.58
1	5472761	5472762	DER_site	2	+	2.02	27.11	5.25	2.38	4.93	0.18	2.98	0.97
1	5472764	5472765	DER_site	10	+	0.96	69.79	13.60	10.17	18.97	0.09	16.15	0.18
1	5472765	5472766	DER_site	4	+	0.72	38.12	6.98	3.95	12.41	0.41	9.78	0.64
1	5472769	5472770	DER_site	11	+	0.58	72.57	14.19	10.73	26.90	0.01	8.02	0.78
1	5472815	5472816	DER_site	4	+	1.13	37.43	6.83	3.82	14.93	0.25	20.54	0.06
1	5472834	5472835	DER_site	2	+	0.39	27.48	4.80	1.98	5.29	0.95	8.15	0.77
1	5472835	5472836	DER_site	7	+	1.02	54.03	10.28	7.03	16.33	0.18	18.27	0.11
1	5472836	5472837	DER_site	15	+	1.02	92.84	18.48	14.86	20.25	0.06	16.14	0.18
1	5472837	5472838	DER_site	11	+	1.03	76.12	14.94	11.45	21.87	0.04	9.93	0.62
1	5472838	5472839	DER_site	2	+	0.66	25.48	4.40	1.63	19.70	0.07	4.03	0.98
1	5472849	5472850	DER_site	23	+	1.82	130.21	27.31	23.45	6.43	0.70	13.17	0.16
1	5472857	5472858	DER_site	3	+	1.70	31.75	5.67	2.76	3.60	0.94	6.19	0.91
1	5472858	5472859	DER_site	12	+	1.03	78.62	15.47	11.96	12.79	0.17	15.02	0.24
1	5472859	5472860	DER_site	2	+	0.72	28.70	5.05	2.20	18.01	0.12	5.60	0.93
1	5472883	5472884	DER_site	6	+	-0.94	49.14	9.26	6.07	15.36	0.22	10.39	0.58
1	5472884	5472885	DER_site	22	+	1.37	125.71	25.49	21.67	8.63	0.47	11.01	0.53
1	5472890	5472891	DER_site	6	+	0.84	46.45	8.70	5.54	12.74	0.39	6.79	0.87
1	5472891	5472892	DER_site	8	+	1.16	58.31	11.18	7.87	23.22	0.03	6.84	0.87
1	5482057	5482058	DER_site	3	+	1.56	35.35	6.40	3.42	7.19	0.84	10.81	0.55
1	5482058	5482059	DER_site	3	+	1.82	33.39	6.00	3.06	8.28	0.76	12.30	0.20
1	5482059	5482060	DER_site	5	+	2.03	43.84	8.16	5.04	12.76	0.39	5.71	0.93
1	5482072	5482073	DER_site	7	+	0.96	53.12	10.09	6.85	6.86	0.65	11.51	0.49
1	5482111	5482112	DER_site	6	+	1.68	45.57	9.15	5.96	5.86	0.44	8.97	0.44
1	5482112	5482113	DER_site	1	+	1.10	22.12	4.21	1.46	4.63	0.20	7.74	0.56
1	5482115	5482116	DER_site	4	+	0.76	37.86	7.52	4.45	18.42	0.03	4.35	0.89
1	5482123	5482124	DER_site	5	+	1.57	44.02	8.20	5.07	4.20	0.65	16.36	0.18
1	5482128	5482129	DER_site	2	+	1.39	27.40	4.78	1.96	4.64	0.59	9.57	0.65
1	5482129	5482130	DER_site	2	+	1.45	28.25	4.96	2.12	3.05	0.80	12.44	0.41
1	5491202	5491203	DER_site	2	+	1.12	27.94	4.89	2.06	4.84	0.85	8.22	0.77
1	5491204	5491205	DER_site	2	+	0.83	28.23	4.95	2.11	11.99	0.45	8.42	0.75
1	5491217	5491218	DER_site	20	+	2.75	117.13	23.66	19.88	9.64	0.14	13.21	0.35
1	5491298	5491299	DER_site	10	+	2.59	66.99	13.73	10.29	8.25	0.22	4.65	0.86
1	5491303	5491304	DER_site	4	+	1.65	36.92	6.73	3.72	12.61	0.18	9.58	0.65
1	5495397	5495398	DER_site	5	-	3.80	42.84	8.57	5.42	3.28	0.77	9.03	0.43
1	5515830	5515831	DER_site	8	+	2.88	57.55	11.71	8.37	3.78	0.29	7.03	0.63
1	5515925	5515926	DER_site	6	+	2.72	41.80	9.08	5.89	3.48	0.75	1.35	0.97
1	5538874	5538875	DER_site	4	-	5.86	34.40	6.79	3.77	0.00	1.00	5.97	0.74
1	5542730	5542731	DER_site	6	+	1.47	48.13	9.70	6.47	12.13	0.21	12.95	0.16
1	5542732	5542733	DER_site	3	+	1.20	32.72	5.86	2.93	12.60	0.18	16.42	0.17
1	5542754	5542755	DER_site	6	+	1.34	48.15	9.70	6.48	5.12	0.82	5.69	0.77
1	5542805	5542806	DER_site	15	+	2.27	91.39	18.18	14.56	11.18	0.51	11.86	0.46
1	5542806	5542807	DER_site	20	+	2.61	116.39	23.50	19.73	8.73	0.73	5.52	0.94
1	5546184	5546185	DER_site	2	-	2.05	30.32	5.38	2.49	6.84	0.65	8.30	0.76
1	5555052	5555053	DER_site	6	-	1.04	43.63	8.74	5.58	8.97	0.44	4.17	0.90
1	5555053	5555054	DER_site	5	-	1.93	40.25	8.03	4.92	2.42	0.88	3.02	0.96
1	5555166	5555167	DER_site	3	-	1.44	28.92	5.63	2.72	7.98	0.54	8.51	0.48
1	5555167	5555168	DER_site	2	-	2.37	29.59	5.23	2.36	5.50	0.48	13.00	0.37
1	5555169	5555170	DER_site	10	-	3.82	69.94	13.63	10.20	14.93	0.09	3.81	0.99
1	5555171	5555172	DER_site	14	-	2.74	86.23	17.08	13.50	4.03	0.91	11.49	0.49
1	5581907	5581908	DER_site	2	+	1.85	27.65	4.83	2.01	10.48	0.57	9.52	0.66
1	5581954	5581955	DER_site	2	+	2.07	25.18	4.34	1.57	6.24	0.72	9.69	0.64
1	5592966	5592967	DER_site	2	+	3.40	19.63	4.26	1.51	4.93	0.55	5.03	0.54
1	5593015	5593016	DER_site	3	+	3.26	32.78	5.88	2.95	6.25	0.40	14.57	0.27
1	5625517	5625518	DER_site	4	+	1.54	37.64	6.88	3.86	11.19	0.26	8.83	0.72
1	5625523	5625524	DER_site	3	+	1.65	30.50	5.41	2.53	14.55	0.27	8.13	0.77
1	5625527	5625528	DER_site	10	+	2.96	66.80	12.97	9.57	6.02	0.74	3.97	0.98
1	5625528	5625529	DER_site	9	+	2.10	63.52	12.28	8.91	8.92	0.71	8.08	0.78
1	5625549	5625550	DER_site	1	+	1.29	22.19	4.23	1.48	5.86	0.44	3.18	0.96
1	5670570	5670571	DER_site	3	+	2.81	33.53	6.03	3.09	6.86	0.65	7.03	0.63
1	5670588	5670589	DER_site	3	+	1.23	28.58	5.56	2.66	4.72	0.58	10.58	0.31
1	5675742	5675743	DER_site	3	-	0.77	31.24	6.12	3.17	15.22	0.08	6.76	0.66
1	5675743	5675744	DER_site	5	-	2.53	44.48	8.29	5.16	6.04	0.74	7.86	0.80
1	5675761	5675762	DER_site	2	-	1.99	22.75	4.34	1.58	11.79	0.23	3.23	0.78
1	5675799	5675800	DER_site	6	-	2.64	49.25	9.28	6.09	10.79	0.29	8.76	0.72
1	5711732	5711733	DER_site	5	+	1.88	35.25	7.65	4.57	1.96	0.92	2.09	0.91
1	5711762	5711763	DER_site	2	+	1.67	30.03	5.32	2.44	11.52	0.24	9.90	0.62
1	5711763	5711764	DER_site	2	+	1.57	19.61	4.26	1.51	1.77	0.62	2.74	0.84
1	5711876	5711877	DER_site	5	+	2.03	44.27	8.25	5.12	3.02	0.96	8.92	0.71
1	5726349	5726350	DER_site	4	+	1.13	40.97	7.56	4.49	23.33	0.03	13.53	0.33
1	5726354	5726355	DER_site	6	+	1.05	46.47	8.71	5.55	5.94	0.92	11.30	0.50
1	5756684	5756685	DER_site	9	+	3.60	63.72	12.32	8.95	6.56	0.68	9.44	0.66
1	5756745	5756746	DER_site	8	+	2.25	57.17	10.94	7.65	6.72	0.67	8.85	0.72
1	5756784	5756785	DER_site	3	+	1.68	31.00	6.07	3.12	11.84	0.22	2.62	0.98
1	5762784	5762785	DER_site	2	-	1.98	24.50	4.71	1.90	4.89	0.56	3.70	0.93
1	5762786	5762787	DER_site	8	-	2.79	53.83	10.91	7.62	12.18	0.20	6.11	0.73
1	5762787	5762788	DER_site	2	-	1.72	22.75	4.34	1.58	2.99	0.81	9.40	0.40
1	5770789	5770790	DER_site	3	-	2.65	29.13	5.68	2.76	14.96	0.09	5.34	0.80
1	5776134	5776135	DER_site	7	+	-1.06	54.66	10.42	7.15	14.76	0.25	8.99	0.70
1	5776135	5776136	DER_site	8	+	-1.00	59.13	11.35	8.04	25.92	0.01	9.50	0.66
1	5776163	5776164	DER_site	5	+	1.51	43.23	8.03	4.92	6.39	0.70	8.49	0.75
1	5776164	5776165	DER_site	13	+	2.27	84.07	16.62	13.06	7.60	0.82	4.11	0.98
1	5776165	5776166	DER_site	8	+	1.50	61.42	11.84	8.49	7.59	0.58	8.92	0.71
1	5776166	5776167	DER_site	10	+	1.18	71.04	13.86	10.42	11.70	0.47	4.50	0.97
1	5776167	5776168	DER_site	6	+	1.02	50.76	9.60	6.38	10.13	0.60	5.77	0.93
1	5776169	5776170	DER_site	4	+	0.47	36.67	6.68	3.67	4.78	0.96	13.66	0.32
1	5776201	5776202	DER_site	14	+	1.60	89.65	17.81	14.20	16.55	0.17	8.46	0.75
1	5776203	5776204	DER_site	18	+	1.73	107.61	21.63	17.91	7.61	0.81	7.41	0.83
1	5776241	5776242	DER_site	4	+	0.71	38.36	7.02	3.99	26.39	0.01	11.59	0.48
1	5776401	5776402	DER_site	3	-	1.02	33.82	6.09	3.14	10.18	0.60	9.51	0.39
1	5776402	5776403	DER_site	4	-	0.94	38.33	7.02	3.99	8.59	0.74	10.56	0.57
1	5776405	5776406	DER_site	13	-	3.03	84.95	16.81	13.24	11.41	0.49	12.00	0.45
1	5776406	5776407	DER_site	6	-	2.19	48.82	9.20	6.00	12.65	0.39	12.16	0.43
1	5776489	5776490	DER_site	6	-	1.53	47.67	8.96	5.78	6.35	0.70	8.39	0.75
1	5776491	5776492	DER_site	2	-	0.87	28.63	5.03	2.19	9.58	0.39	6.11	0.91
1	5787384	5787385	DER_site	3	-	1.98	34.55	6.24	3.28	6.24	0.72	12.03	0.44
1	5787401	5787402	DER_site	6	-	2.49	49.62	9.36	6.16	6.77	0.87	9.05	0.70
1	5787408	5787409	DER_site	2	-	-1.67	26.67	4.63	1.83	3.45	0.94	13.26	0.35
1	5831266	5831267	DER_site	3	+	2.22	28.10	5.46	2.57	3.77	0.93	9.39	0.40
1	5840323	5840324	DER_site	10	-	2.75	68.36	13.30	9.88	16.06	0.19	3.71	0.93
1	5840336	5840337	DER_site	3	-	2.75	28.32	5.51	2.61	7.31	0.29	10.26	0.33
1	5845802	5845803	DER_site	3	-	2.77	30.59	5.43	2.54	9.05	0.70	13.10	0.36
1	5845830	5845831	DER_site	2	-	0.80	26.03	4.50	1.72	7.02	0.63	7.75	0.80
1	5845863	5845864	DER_site	2	-	5.38	23.50	4.50	1.72	0.00	1.00	3.98	0.91
1	5845870	5845871	DER_site	1	-	2.06	21.35	4.05	1.33	2.73	0.44	7.32	0.60
1	5845871	5845872	DER_site	5	-	3.14	40.33	8.04	4.93	5.94	0.43	9.78	0.37
1	5869261	5869262	DER_site	2	+	3.10	23.52	5.11	2.25	2.62	0.45	10.84	0.09
1	5879967	5879968	DER_site	2	+	1.99	26.51	5.13	2.27	7.64	0.27	3.25	0.78
1	5880216	5880217	DER_site	2	-	2.12	25.56	4.41	1.64	12.35	0.42	10.40	0.58
1	5880238	5880239	DER_site	2	-	3.99	24.29	5.27	2.40	1.80	0.62	4.27	0.64
1	5880258	5880259	DER_site	2	-	2.16	24.65	4.74	1.93	10.44	0.32	6.80	0.66
1	5880324	5880325	DER_site	4	-	2.22	37.96	6.94	3.92	9.09	0.17	11.89	0.45
1	5890152	5890153	DER_site	2	+	-1.29	25.23	4.86	2.03	3.97	0.68	3.90	0.92
1	5890346	5890347	DER_site	2	+	1.68	26.99	4.70	1.89	10.23	0.33	11.45	0.49
1	5890349	5890350	DER_site	2	+	0.81	26.38	4.58	1.78	8.08	0.78	16.89	0.15
1	5890350	5890351	DER_site	3	+	-0.84	35.03	6.34	3.37	16.88	0.15	11.70	0.47
1	5890351	5890352	DER_site	7	+	-0.90	55.91	10.68	7.40	17.70	0.13	13.23	0.35
1	5890352	5890353	DER_site	6	+	-0.83	50.12	9.47	6.26	15.45	0.22	8.58	0.74
1	5890355	5890356	DER_site	6	+	1.58	50.84	9.62	6.40	10.96	0.09	11.44	0.49
1	5890370	5890371	DER_site	21	+	2.29	121.02	24.49	20.69	6.83	0.87	14.46	0.27
1	5890371	5890372	DER_site	16	+	1.90	97.94	19.57	15.91	6.46	0.89	6.89	0.86
1	5890374	5890375	DER_site	6	+	3.19	50.52	9.55	6.34	9.32	0.68	10.42	0.58
1	5916915	5916916	DER_site	1	-	1.70	21.71	4.13	1.39	1.88	0.93	9.04	0.43
1	5916946	5916947	DER_site	2	-	1.10	21.09	4.58	1.79	10.08	0.12	7.06	0.32
1	5916993	5916994	DER_site	4	-	1.94	36.95	7.33	4.27	8.87	0.45	9.41	0.40
1	5916994	5916995	DER_site	2	-	1.85	24.31	4.67	1.86	7.49	0.59	9.98	0.35
1	5916995	5916996	DER_site	5	-	2.94	37.85	8.22	5.09	6.37	0.38	3.02	0.81
1	5926168	5926169	DER_site	2	+	0.95	26.47	4.59	1.80	2.52	0.98	6.68	0.88
1	5926169	5926170	DER_site	5	+	1.78	44.20	8.23	5.11	11.88	0.46	9.18	0.69
1	5926170	5926171	DER_site	4	+	1.06	38.97	7.15	4.11	9.73	0.37	9.26	0.68
1	5926171	5926172	DER_site	2	+	1.61	28.36	4.98	2.14	13.10	0.04	13.31	0.35
1	5926172	5926173	DER_site	26	+	2.83	146.00	29.83	25.91	8.41	0.49	9.01	0.70
1	5926173	5926174	DER_site	5	+	1.46	41.06	7.58	4.50	6.60	0.36	6.99	0.86
1	5926231	5926232	DER_site	2	+	0.85	25.22	4.34	1.58	14.66	0.26	7.38	0.60
1	5926259	5926260	DER_site	8	+	1.61	56.86	10.88	7.59	3.12	0.37	7.49	0.82
1	5926260	5926261	DER_site	3	+	2.10	31.70	6.22	3.25	10.61	0.10	5.82	0.76
1	5926261	5926262	DER_site	2	+	1.98	27.30	5.29	2.42	11.99	0.21	8.44	0.49
1	5926292	5926293	DER_site	10	+	2.56	68.15	13.25	9.84	15.46	0.02	9.89	0.63
1	5984126	5984127	DER_site	3	-	3.10	30.81	6.03	3.08	12.73	0.18	5.87	0.75
1	6006249	6006250	DER_site	3	+	2.13	32.55	5.83	2.90	10.84	0.54	6.65	0.88
1	6006292	6006293	DER_site	4	+	2.00	36.96	6.74	3.73	10.60	0.56	6.63	0.68
1	6006293	6006294	DER_site	5	+	1.65	41.87	8.37	5.23	8.41	0.21	6.45	0.69
1	6006294	6006295	DER_site	3	+	1.72	33.57	6.04	3.09	9.17	0.69	14.61	0.26
1	6006295	6006296	DER_site	3	+	2.58	31.17	6.11	3.15	1.30	0.73	8.11	0.52
1	6006296	6006297	DER_site	1	+	1.98	22.18	4.22	1.47	1.63	0.95	5.90	0.75
1	6006307	6006308	DER_site	1	+	2.58	23.98	4.09	1.36	5.62	0.47	6.69	0.88
1	6093477	6093478	DER_site	2	-	-4.32	19.70	4.28	1.52	5.05	0.54	1.68	0.64
1	6093492	6093493	DER_site	3	-	3.44	35.15	6.36	3.39	0.14	0.99	7.52	0.82
1	6093512	6093513	DER_site	4	-	2.96	35.30	6.98	3.95	4.64	0.59	5.63	0.78
1	6100189	6100190	DER_site	2	+	1.86	24.38	4.68	1.88	12.94	0.17	6.69	0.67
1	6125192	6125193	DER_site	3	+	3.54	32.30	5.78	2.86	9.24	0.42	11.69	0.47
1	6146009	6146010	DER_site	4	+	0.87	36.50	6.64	3.64	7.57	0.82	12.48	0.19
1	6146037	6146038	DER_site	11	+	3.25	67.34	14.62	11.15	0.64	0.89	1.19	0.98
1	6146038	6146039	DER_site	2	+	2.44	22.44	4.28	1.52	4.17	0.65	4.91	0.84
1	6146040	6146041	DER_site	6	+	1.50	48.23	9.72	6.50	3.44	0.94	5.96	0.74
1	6146046	6146047	DER_site	3	+	2.77	32.59	6.40	3.42	8.89	0.45	4.62	0.87
1	6146047	6146048	DER_site	2	+	1.81	23.37	4.47	1.69	12.68	0.18	4.17	0.90
1	6152443	6152444	DER_site	25	-	0.70	139.49	28.44	24.55	13.43	0.34	11.56	0.48
1	6152444	6152445	DER_site	27	-	1.83	148.94	31.35	27.39	10.82	0.29	5.25	0.81
1	6152446	6152447	DER_site	18	-	2.05	105.91	21.27	17.56	12.56	0.40	6.36	0.90
1	6152449	6152450	DER_site	24	-	1.44	138.17	28.16	24.27	25.45	0.01	25.82	0.01
1	6152450	6152451	DER_site	16	-	1.40	96.29	19.22	15.57	19.05	0.09	17.73	0.12
1	6152462	6152463	DER_site	5	-	-0.96	44.88	8.37	5.24	8.35	0.76	13.91	0.31
1	6152465	6152466	DER_site	67	-	3.26	341.76	71.98	67.44	25.63	0.00	10.56	0.57
1	6152467	6152468	DER_site	3	-	2.32	31.96	5.71	2.79	10.78	0.29	13.59	0.33
1	6152469	6152470	DER_site	7	-	2.37	52.99	10.07	6.82	8.04	0.53	11.29	0.50
1	6152472	6152473	DER_site	15	-	1.90	92.83	18.48	14.86	5.21	0.95	17.52	0.13
1	6152473	6152474	DER_site	2	-	1.33	26.82	4.67	1.86	4.52	0.87	6.33	0.90
1	6152474	6152475	DER_site	4	-	1.11	37.14	6.77	3.76	6.79	0.66	4.49	0.97
1	6152476	6152477	DER_site	3	-	0.02	30.85	5.48	2.59	4.90	0.84	7.35	0.83
1	6152541	6152542	DER_site	5	-	0.69	42.93	7.97	4.87	4.04	0.91	8.90	0.71
1	6152542	6152543	DER_site	9	-	1.22	64.66	12.52	9.14	14.04	0.12	10.09	0.61
1	6152543	6152544	DER_site	10	-	1.40	69.12	13.46	10.04	6.97	0.64	18.54	0.10
1	6152544	6152545	DER_site	9	-	1.08	65.59	12.71	9.33	8.52	0.74	14.07	0.30
1	6154327	6154328	DER_site	3	-	2.32	30.09	5.88	2.95	6.69	0.35	4.55	0.87
1	6154328	6154329	DER_site	4	-	2.45	34.86	6.89	3.86	10.95	0.28	5.89	0.75
1	6154354	6154355	DER_site	6	-	3.85	45.84	9.21	6.02	7.56	0.27	5.53	0.79
1	6187596	6187597	DER_site	1	-	2.68	19.12	4.15	1.41	5.18	0.52	4.89	0.56
1	6211924	6211925	DER_site	3	-	2.03	32.98	5.92	2.98	10.12	0.61	10.10	0.61
1	6211926	6211927	DER_site	4	-	1.20	38.51	7.06	4.02	8.80	0.72	11.03	0.53
1	6211959	6211960	DER_site	2	-	1.93	25.79	4.46	1.68	6.55	0.68	7.13	0.85
1	6212009	6212010	DER_site	29	-	2.62	161.54	33.16	29.17	19.52	0.08	10.15	0.60
1	6212010	6212011	DER_site	7	-	2.28	55.73	10.64	7.36	12.43	0.19	5.31	0.95
1	6212012	6212013	DER_site	5	-	2.13	38.80	7.72	4.63	1.88	0.93	7.48	0.59
1	6213812	6213813	DER_site	4	-	3.61	38.77	7.11	4.07	1.34	0.72	7.55	0.82
1	6213817	6213818	DER_site	2	-	1.38	24.99	4.30	1.54	15.06	0.24	8.76	0.72
1	6213853	6213854	DER_site	1	-	-0.53	21.72	4.13	1.39	7.44	0.59	9.06	0.43
1	6213858	6213859	DER_site	6	-	1.74	48.53	9.13	5.95	7.76	0.56	7.60	0.82
1	6213862	6213863	DER_site	3	-	1.65	35.63	6.46	3.48	8.49	0.75	11.81	0.46
1	6213871	6213872	DER_site	5	-	1.73	45.60	8.53	5.38	8.67	0.47	10.46	0.58
1	6213874	6213875	DER_site	2	-	1.03	27.45	5.33	2.45	6.04	0.74	5.38	0.80
1	6213879	6213880	DER_site	2	-	2.80	25.84	4.47	1.69	6.22	0.72	5.82	0.93
1	6213880	6213881	DER_site	1	-	1.88	24.12	4.12	1.39	9.67	0.14	11.71	0.47
1	6213891	6213892	DER_site	4	-	2.03	38.97	7.15	4.11	6.18	0.40	9.42	0.67
1	6213892	6213893	DER_site	2	-	1.84	29.34	5.18	2.31	6.72	0.67	6.33	0.90
1	6213893	6213894	DER_site	3	-	1.91	28.92	5.63	2.72	0.66	0.88	4.16	0.90
1	6213918	6213919	DER_site	2	-	1.19	23.37	4.47	1.69	6.56	0.68	9.76	0.37
1	6213952	6213953	DER_site	6	-	2.09	50.05	9.45	6.24	8.70	0.73	4.47	0.97
1	6213953	6213954	DER_site	13	-	2.09	86.05	17.04	13.47	5.63	0.93	9.05	0.70
1	6223976	6223977	DER_site	17	+	1.69	101.52	20.33	16.65	12.95	0.37	8.93	0.71
1	6223977	6223978	DER_site	4	+	0.13	37.08	7.35	4.29	11.70	0.23	9.79	0.37
1	6223978	6223979	DER_site	16	+	1.42	97.72	19.52	15.87	15.12	0.23	7.10	0.85
1	6223979	6223980	DER_site	15	+	1.17	92.47	18.41	14.78	24.91	0.00	15.54	0.21
1	6223980	6223981	DER_site	7	+	0.83	54.39	10.36	7.10	13.42	0.34	9.15	0.69
1	6223987	6223988	DER_site	1	+	1.12	24.46	4.19	1.45	8.14	0.52	6.47	0.89
1	6223988	6223989	DER_site	2	+	1.51	28.27	4.96	2.12	5.79	0.76	11.39	0.50
1	6223989	6223990	DER_site	8	+	1.75	59.02	11.33	8.02	8.58	0.48	13.77	0.32
1	6223990	6223991	DER_site	24	+	1.66	134.97	27.47	23.60	4.67	0.97	6.52	0.89
1	6223991	6223992	DER_site	6	+	1.15	47.37	8.89	5.72	10.42	0.32	6.49	0.89
1	6223992	6223993	DER_site	5	+	1.13	41.36	7.65	4.56	7.37	0.83	10.74	0.55
1	6224011	6224012	DER_site	18	+	1.73	108.20	21.75	18.03	10.52	0.31	6.71	0.88
1	6224014	6224015	DER_site	13	+	1.63	83.64	16.53	12.98	6.58	0.88	6.54	0.89
1	6224064	6224065	DER_site	4	+	2.76	38.04	7.56	4.48	8.82	0.18	3.18	0.96
1	6244482	6244483	DER_site	3	-	2.46	28.10	5.46	2.57	2.84	0.83	8.12	0.52
1	6253969	6253970	DER_site	2	+	2.42	23.84	4.57	1.78	5.93	0.75	5.82	0.76
1	6283565	6283566	DER_site	2	-	3.69	24.13	4.63	1.83	1.86	0.60	8.03	0.53
1	6351812	6351813	DER_site	3	+	2.62	29.90	5.84	2.91	6.46	0.09	9.18	0.42
1	6351856	6351857	DER_site	4	+	1.74	34.58	6.83	3.81	10.73	0.29	5.00	0.54
1	6356045	6356046	DER_site	13	+	3.83	79.62	16.43	12.88	9.26	0.41	8.24	0.51
1	6356217	6356218	DER_site	1	-	2.54	22.00	4.19	1.44	2.47	0.87	4.47	0.88
1	6372894	6372895	DER_site	5	+	2.40	39.19	7.80	4.71	5.26	0.81	10.19	0.34
1	6372942	6372943	DER_site	3	+	1.28	34.55	6.24	3.28	5.87	0.44	7.50	0.82
1	6372943	6372944	DER_site	4	+	2.85	38.19	6.99	3.96	12.21	0.43	8.51	0.48
1	6372944	6372945	DER_site	13	+	3.49	83.76	16.56	13.00	14.56	0.27	18.16	0.11
1	6372945	6372946	DER_site	7	+	3.04	52.09	10.54	7.27	14.52	0.11	4.81	0.85
1	6372989	6372990	DER_site	6	+	2.51	45.65	9.17	5.98	2.94	0.82	7.77	0.56
1	6372990	6372991	DER_site	5	+	2.40	42.14	7.81	4.71	3.47	0.75	13.30	0.35
1	6377366	6377367	DER_site	2	-	1.02	25.20	4.34	1.58	9.36	0.40	5.65	0.93
1	6377367	6377368	DER_site	7	-	1.23	55.45	10.58	7.31	12.84	0.38	8.60	0.74
1	6377369	6377370	DER_site	14	-	1.24	87.08	17.26	13.68	8.84	0.72	15.74	0.20
1	6377370	6377371	DER_site	11	-	1.15	72.41	14.15	10.70	17.88	0.12	7.31	0.84
1	6377371	6377372	DER_site	8	-	1.05	61.06	11.76	8.42	10.26	0.59	11.91	0.45
1	6377372	6377373	DER_site	6	-	-1.10	46.41	8.69	5.54	10.72	0.55	11.60	0.48
1	6377373	6377374	DER_site	1	-	-1.25	21.86	4.16	1.42	9.47	0.39	4.21	0.90
1	6377375	6377376	DER_site	78	-	3.50	390.12	82.42	77.77	10.32	0.59	8.21	0.77
1	6377376	6377377	DER_site	12	-	2.34	78.56	15.45	11.95	5.83	0.92	14.64	0.26
1	6377392	6377393	DER_site	2	-	-0.61	24.46	4.70	1.89	6.41	0.70	10.16	0.34
1	6377426	6377427	DER_site	6	-	1.62	46.67	8.75	5.59	12.97	0.37	6.08	0.73
1	6377427	6377428	DER_site	4	-	1.44	38.87	7.13	4.09	11.88	0.46	14.46	0.27
1	6377445	6377446	DER_site	2	-	2.07	25.92	4.48	1.70	7.34	0.60	4.64	0.97
1	6402702	6402703	DER_site	4	+	3.23	36.88	7.31	4.26	8.35	0.21	6.57	0.68
1	6416533	6416534	DER_site	2	-	1.92	24.18	4.64	1.84	9.00	0.44	3.56	0.94
1	6416534	6416535	DER_site	2	-	1.96	25.45	4.39	1.62	15.74	0.07	7.66	0.57
1	6418963	6418964	DER_site	3	-	2.15	27.95	5.43	2.54	10.45	0.11	7.44	0.59
1	6418965	6418966	DER_site	3	-	1.41	30.36	5.38	2.50	8.52	0.48	10.50	0.57
1	6457913	6457914	DER_site	6	-	1.67	49.29	9.29	6.09	13.21	0.04	14.67	0.26
1	6457914	6457915	DER_site	6	-	3.51	42.06	9.13	5.94	1.59	0.66	6.73	0.35
1	6457949	6457950	DER_site	9	-	2.52	64.65	12.52	9.14	15.76	0.20	12.43	0.41
1	6457950	6457951	DER_site	11	-	2.77	75.63	14.83	11.35	8.32	0.76	13.74	0.32
1	6457952	6457953	DER_site	4	-	1.72	39.83	7.33	4.27	11.65	0.47	11.04	0.53
1	6462127	6462128	DER_site	6	+	1.66	47.29	8.88	5.70	16.26	0.18	12.85	0.38
1	6462128	6462129	DER_site	13	+	2.16	83.28	16.45	12.91	21.29	0.05	6.10	0.73
1	6462129	6462130	DER_site	15	+	2.34	93.11	18.54	14.92	13.97	0.30	8.56	0.74
1	6462130	6462131	DER_site	13	+	2.18	83.39	16.48	12.93	10.53	0.57	6.74	0.66
1	6462131	6462132	DER_site	12	+	2.29	79.09	15.57	12.05	4.17	0.65	7.10	0.85
1	6462132	6462133	DER_site	3	+	1.27	30.86	6.04	3.09	5.67	0.77	4.59	0.87
1	6481348	6481349	DER_site	1	-	1.72	24.74	4.25	1.49	8.00	0.53	11.95	0.45
1	6481361	6481362	DER_site	6	-	2.27	51.26	9.70	6.48	18.48	0.10	8.91	0.45
1	6481390	6481391	DER_site	4	-	3.68	37.26	6.80	3.78	6.91	0.33	15.21	0.23
1	6504864	6504865	DER_site	3	-	4.13	29.12	5.68	2.76	4.97	0.55	8.00	0.53
1	6551830	6551831	DER_site	3	+	3.34	27.66	6.01	3.06	6.12	0.41	6.72	0.35
1	6560835	6560836	DER_site	3	-	2.14	34.24	6.18	3.22	10.25	0.59	4.76	0.85
1	6560837	6560838	DER_site	3	-	2.73	31.77	6.23	3.27	4.87	0.56	2.14	0.99
1	6560973	6560974	DER_site	6	-	1.08	47.89	9.00	5.82	11.74	0.47	8.39	0.75
1	6560974	6560975	DER_site	11	-	2.00	72.89	14.26	10.80	15.23	0.23	10.72	0.55
1	6605752	6605753	DER_site	2	+	1.79	24.55	4.72	1.91	6.70	0.67	5.15	0.82
1	6605753	6605754	DER_site	8	+	3.68	52.88	11.48	8.16	6.45	0.37	8.57	0.20
1	6609271	6609272	DER_site	8	+	3.29	56.62	11.51	8.18	5.70	0.77	8.17	0.52
1	6609273	6609274	DER_site	2	+	1.74	29.07	5.12	2.27	9.31	0.41	7.48	0.82
1	6609420	6609421	DER_site	2	-	2.11	27.49	5.33	2.46	7.14	0.62	6.82	0.66
1	6610977	6610978	DER_site	2	-	3.46	20.22	4.39	1.62	2.72	0.44	5.10	0.53
1	6610978	6610979	DER_site	9	-	6.01	60.85	12.41	9.04	1.47	0.69	6.73	0.67
1	6690321	6690322	DER_site	5	+	2.42	38.78	7.71	4.63	2.48	0.87	8.53	0.48
1	6690543	6690544	DER_site	2	-	3.09	26.47	5.12	2.26	1.98	0.92	6.54	0.69
1	6690641	6690642	DER_site	3	-	1.99	31.39	6.15	3.20	7.49	0.59	7.83	0.55
1	6690642	6690643	DER_site	3	-	2.25	31.32	6.14	3.18	6.73	0.66	3.19	0.96
1	6690643	6690644	DER_site	2	-	2.57	23.41	4.48	1.70	2.84	0.42	6.93	0.64
1	6712104	6712105	DER_site	2	-	1.84	23.71	4.54	1.75	12.30	0.20	9.94	0.36
1	6712113	6712114	DER_site	2	-	1.48	27.83	4.87	2.04	10.62	0.56	7.59	0.27
1	6712130	6712131	DER_site	9	-	2.17	65.52	12.70	9.31	11.30	0.50	2.57	0.98
1	6712131	6712132	DER_site	2	-	2.25	23.48	4.49	1.71	11.45	0.25	6.34	0.71
1	6712132	6712133	DER_site	1	-	1.68	24.51	4.20	1.45	12.75	0.39	0.74	1.00
1	6712134	6712135	DER_site	3	-	2.06	27.93	5.43	2.54	8.83	0.45	4.92	0.84
1	6712166	6712167	DER_site	4	-	2.40	38.63	7.08	4.04	7.26	0.61	11.61	0.24
1	6724608	6724609	DER_site	5	-	3.26	39.83	7.94	4.83	5.58	0.78	6.71	0.67
1	6731548	6731549	DER_site	5	-	2.62	42.61	8.53	5.38	8.98	0.44	5.77	0.76
1	6731549	6731550	DER_site	3	-	2.52	34.78	6.29	3.32	4.93	0.84	15.35	0.22
1	6762661	6762662	DER_site	5	+	3.45	41.60	8.31	5.18	1.65	0.65	9.33	0.41
1	6773379	6773380	DER_site	12	-	1.16	78.81	15.51	12.00	12.89	0.38	3.38	0.99
1	6780991	6780992	DER_site	6	+	2.09	49.39	9.32	6.12	13.67	0.32	4.80	0.85
1	6780993	6780994	DER_site	2	+	-1.42	25.17	4.85	2.02	2.45	0.98	9.05	0.43
1	6800052	6800053	DER_site	5	-	1.27	43.78	8.15	5.03	24.77	0.02	14.17	0.29
1	6800054	6800055	DER_site	8	-	1.46	60.64	11.67	8.34	12.40	0.41	7.20	0.84
1	6800056	6800057	DER_site	3	-	0.83	32.23	5.76	2.84	15.88	0.20	3.95	0.98
1	6800107	6800108	DER_site	10	-	2.36	63.23	12.92	9.52	9.93	0.36	9.05	0.43
1	6800108	6800109	DER_site	13	-	2.24	84.42	16.70	13.14	7.88	0.55	9.60	0.65
1	6807826	6807827	DER_site	3	+	2.39	23.36	5.87	2.94	0.47	0.93	0.65	0.88
1	6809815	6809816	DER_site	2	-	2.29	24.98	4.81	1.99	8.69	0.47	8.35	0.50
1	6816749	6816750	DER_site	2	-	2.17	25.32	4.36	1.60	10.85	0.54	7.01	0.86
1	6816793	6816794	DER_site	7	-	3.46	49.09	9.90	6.67	1.24	0.74	13.88	0.13
1	6816809	6816810	DER_site	2	-	1.86	26.91	5.21	2.35	9.78	0.37	5.09	0.53
1	6823109	6823110	DER_site	2	-	2.44	24.39	4.68	1.88	6.69	0.67	6.37	0.70
1	6825292	6825293	DER_site	1	+	2.15	24.41	4.18	1.44	15.41	0.22	4.93	0.96
1	6825293	6825294	DER_site	3	+	2.34	33.26	5.98	3.04	5.85	0.75	8.89	0.71
1	6825297	6825298	DER_site	3	+	0.96	30.93	5.50	2.60	10.92	0.28	9.10	0.69
1	6825330	6825331	DER_site	5	+	1.28	45.70	8.55	5.40	20.45	0.06	12.08	0.44
1	6895155	6895156	DER_site	4	-	2.54	34.79	6.87	3.85	2.28	0.89	4.37	0.89
1	6895163	6895164	DER_site	7	-	3.15	53.31	10.13	6.89	8.71	0.46	13.69	0.32
1	6895164	6895165	DER_site	8	-	3.35	53.89	10.93	7.63	8.68	0.47	16.28	0.06
1	6900480	6900481	DER_site	7	-	4.32	52.93	10.72	7.44	8.12	0.52	6.08	0.73
1	6900481	6900482	DER_site	10	-	4.85	60.58	13.16	9.75	4.34	0.23	5.31	0.51
1	6902198	6902199	DER_site	1	-	-4.28	18.78	4.08	1.35	8.21	0.22	1.46	0.69
1	6914424	6914425	DER_site	5	+	1.33	44.23	8.24	5.11	20.07	0.07	12.43	0.41
1	6914425	6914426	DER_site	2	+	-0.81	28.35	4.97	2.14	15.69	0.21	5.48	0.94
1	6914431	6914432	DER_site	7	+	1.21	51.76	9.81	6.58	12.09	0.44	4.14	0.98
1	6914433	6914434	DER_site	2	+	0.51	26.06	4.51	1.73	12.79	0.38	7.88	0.79
1	6914450	6914451	DER_site	3	+	2.99	35.13	6.36	3.38	6.72	0.67	6.00	0.92
1	6914451	6914452	DER_site	10	+	2.60	66.74	12.96	9.56	6.04	0.74	12.40	0.41
1	6914452	6914453	DER_site	6	+	1.78	50.49	9.54	6.33	15.76	0.20	9.99	0.62
1	6914453	6914454	DER_site	2	+	-0.44	28.18	4.94	2.11	10.45	0.32	10.26	0.59
1	6914454	6914455	DER_site	3	+	0.55	30.74	5.46	2.57	11.42	0.49	18.76	0.09
1	6914464	6914465	DER_site	3	+	1.43	31.28	5.57	2.67	8.76	0.72	11.95	0.45
1	6914504	6914505	DER_site	4	+	1.83	39.22	7.20	4.16	11.68	0.47	16.44	0.17
1	6914505	6914506	DER_site	14	+	2.33	86.72	17.19	13.61	10.14	0.34	5.64	0.93
1	6914690	6914691	DER_site	2	-	1.83	26.23	5.07	2.22	21.24	0.01	1.77	0.99
1	6937954	6937955	DER_site	5	-	1.14	43.85	8.16	5.04	14.89	0.09	7.88	0.79
1	6937955	6937956	DER_site	10	-	1.88	67.41	13.10	9.69	10.11	0.61	6.17	0.91
1	6938020	6938021	DER_site	2	-	2.16	26.13	4.53	1.74	12.05	0.44	7.08	0.85
1	6944907	6944908	DER_site	2	+	1.57	23.04	4.40	1.63	3.29	0.77	4.24	0.90
1	6944910	6944911	DER_site	2	+	0.56	26.17	4.53	1.75	14.24	0.29	10.79	0.29
1	6944934	6944935	DER_site	3	+	0.54	33.50	6.03	3.08	19.54	0.08	10.34	0.59
1	6944951	6944952	DER_site	8	+	1.81	57.37	10.99	7.69	13.11	0.16	13.93	0.31
1	6944972	6944973	DER_site	3	+	0.85	34.40	6.21	3.25	11.28	0.26	5.93	0.92
1	6944980	6944981	DER_site	2	+	1.15	25.34	4.37	1.60	5.77	0.76	5.24	0.95
1	6944981	6944982	DER_site	4	+	1.56	35.07	6.93	3.90	2.51	0.87	5.31	0.81
1	6944982	6944983	DER_site	4	+	1.45	30.07	6.53	3.54	2.46	0.48	3.70	0.72
1	6950226	6950227	DER_site	3	+	1.31	30.81	5.48	2.58	6.93	0.64	11.08	0.52
1	6950278	6950279	DER_site	6	+	3.04	46.54	9.36	6.16	4.45	0.62	5.81	0.76
1	6968712	6968713	DER_site	5	+	2.26	42.43	7.87	4.77	7.57	0.58	21.94	0.04
1	6968803	6968804	DER_site	7	+	2.39	56.03	10.70	7.42	9.02	0.44	10.77	0.55
1	6968813	6968814	DER_site	3	+	2.46	33.82	6.09	3.14	7.18	0.85	11.36	0.50
1	6968840	6968841	DER_site	3	+	2.25	31.49	5.61	2.71	6.69	0.35	8.77	0.72
1	6968877	6968878	DER_site	3	+	2.64	31.65	6.21	3.25	8.92	0.44	9.13	0.42
1	6968899	6968900	DER_site	3	+	2.60	33.97	6.12	3.17	12.52	0.40	20.63	0.06
1	6974629	6974630	DER_site	8	+	3.77	59.75	11.49	8.16	4.05	0.67	9.62	0.65
1	6974698	6974699	DER_site	6	+	2.47	50.24	9.49	6.28	5.87	0.44	13.96	0.30
1	6974724	6974725	DER_site	6	+	2.44	50.39	9.52	6.31	7.48	0.59	10.81	0.55
1	6974725	6974726	DER_site	11	+	3.37	74.55	14.60	11.13	17.78	0.12	3.48	0.94
1	6974729	6974730	DER_site	5	+	2.17	44.50	8.30	5.17	14.97	0.24	7.70	0.81
1	6974753	6974754	DER_site	1	+	2.18	19.08	4.14	1.41	3.31	0.77	5.37	0.50
1	7001242	7001243	DER_site	6	-	2.81	48.91	9.21	6.02	6.58	0.68	5.86	0.92
1	7001269	7001270	DER_site	1	-	1.49	24.06	4.11	1.38	2.54	1.00	3.88	0.92
1	7001273	7001274	DER_site	2	-	1.50	23.02	4.40	1.63	10.11	0.34	5.27	0.81
1	7001293	7001294	DER_site	5	-	2.20	43.95	8.18	5.06	10.94	0.53	8.64	0.47
1	7001331	7001332	DER_site	2	-	1.53	24.53	4.71	1.90	10.69	0.30	3.60	0.94
1	7001334	7001335	DER_site	5	-	1.92	44.90	8.38	5.24	8.61	0.74	9.44	0.66
1	7004937	7004938	DER_site	4	-	2.77	36.85	6.71	3.71	2.54	0.86	6.78	0.87
1	7004943	7004944	DER_site	4	-	-1.06	37.58	6.86	3.84	10.86	0.29	15.06	0.24
1	7004944	7004945	DER_site	2	-	2.24	24.31	4.67	1.86	5.52	0.48	6.12	0.73
1	7007831	7007832	DER_site	3	-	2.75	29.44	5.74	2.82	7.73	0.56	11.26	0.26
1	7007937	7007938	DER_site	7	-	2.55	48.99	9.88	6.65	2.14	0.54	5.47	0.79
1	7007938	7007939	DER_site	13	-	2.65	77.89	16.06	12.53	12.60	0.18	2.07	0.99
1	7020359	7020360	DER_site	2	+	2.08	25.71	4.44	1.67	9.39	0.40	9.37	0.67
1	7020361	7020362	DER_site	2	+	1.73	29.44	5.20	2.33	13.29	0.15	8.20	0.77
1	7020369	7020370	DER_site	3	+	1.34	32.97	5.92	2.98	11.13	0.27	12.90	0.38
1	7020388	7020389	DER_site	5	+	1.68	38.22	7.60	4.52	4.46	0.88	6.87	0.65
1	7020390	7020391	DER_site	8	+	1.48	60.90	11.73	8.39	15.52	0.21	9.33	0.67
1	7020391	7020392	DER_site	4	+	1.08	36.37	6.61	3.62	10.89	0.54	4.95	0.96
1	7020398	7020399	DER_site	6	+	1.84	48.71	9.17	5.98	10.72	0.30	6.49	0.89
1	7020416	7020417	DER_site	3	+	0.18	32.98	5.92	2.98	12.77	0.17	13.02	0.37
1	7020481	7020482	DER_site	12	+	2.19	79.01	15.55	12.04	9.10	0.69	9.75	0.37
1	7020482	7020483	DER_site	23	+	2.70	132.25	26.89	23.03	6.88	0.87	5.51	0.79
1	7020483	7020484	DER_site	12	+	2.22	77.51	15.23	11.73	11.85	0.22	5.09	0.95
1	7020484	7020485	DER_site	20	+	2.22	115.75	24.20	20.41	11.33	0.25	5.76	0.76
1	7020485	7020486	DER_site	7	+	1.94	52.75	10.68	7.40	9.12	0.43	6.29	0.71
1	7020486	7020487	DER_site	8	+	1.84	57.34	10.98	7.68	8.70	0.47	6.94	0.86
1	7020555	7020556	DER_site	2	+	2.11	25.78	4.97	2.13	7.52	0.28	5.71	0.77
1	7038839	7038840	DER_site	7	-	3.85	55.66	10.63	7.35	7.44	0.28	15.63	0.21
1	7042629	7042630	DER_site	5	-	0.50	45.11	8.42	5.28	18.33	0.11	19.81	0.07
1	7042631	7042632	DER_site	119	-	1.55	580.55	123.60	118.63	10.98	0.53	15.90	0.20
1	7042632	7042633	DER_site	27	-	0.94	152.62	31.25	27.30	13.15	0.36	33.53	0.00
1	7042651	7042652	DER_site	131	-	0.37	636.85	135.79	130.71	244.43	0.00	68.89	0.00
1	7042653	7042654	DER_site	164	-	1.11	791.84	169.35	164.05	122.61	0.00	21.05	0.05
1	7042654	7042655	DER_site	inf	-	1.31	2086.61	inf	inf	135.01	0.00	62.42	0.00
1	7042655	7042656	DER_site	19	-	0.18	112.09	22.58	18.84	23.56	0.02	13.76	0.32
1	7042656	7042657	DER_site	44	-	0.90	231.42	48.18	43.96	69.01	0.00	13.13	0.36
1	7042657	7042658	DER_site	41	-	0.73	217.60	45.21	41.03	101.76	0.00	57.01	0.00
1	7042736	7042737	DER_site	16	-	0.71	97.21	19.41	15.76	14.63	0.26	10.10	0.61
1	7051660	7051661	DER_site	2	-	3.94	26.76	5.18	2.32	7.29	0.61	5.95	0.74
1	7083322	7083323	DER_site	5	-	3.10	42.69	7.92	4.82	5.91	0.43	9.18	0.69
1	7103593	7103594	DER_site	2	-	3.62	25.92	4.48	1.70	3.85	0.70	11.30	0.50
1	7103595	7103596	DER_site	2	-	2.14	28.99	5.10	2.25	6.06	0.73	9.67	0.38
1	7115297	7115298	DER_site	2	+	2.52	27.21	5.27	2.40	8.16	0.52	11.40	0.25
1	7115328	7115329	DER_site	2	+	2.98	22.92	4.98	2.14	0.63	0.89	2.95	0.81
1	7119826	7119827	DER_site	1	-	1.75	21.53	4.09	1.36	4.52	0.61	3.84	0.70
1	7119840	7119841	DER_site	1	-	3.47	19.17	4.16	1.42	4.18	0.65	2.87	0.41
1	7130486	7130487	DER_site	2	+	1.62	25.13	4.84	2.02	5.35	0.80	9.43	0.40
1	7130540	7130541	DER_site	6	+	1.69	47.93	9.01	5.83	10.24	0.60	5.86	0.75
1	7130541	7130542	DER_site	7	+	2.68	46.25	10.04	6.80	3.84	0.70	7.24	0.30
1	7130558	7130559	DER_site	3	+	2.35	33.68	6.06	3.11	11.56	0.07	9.21	0.68
1	7146338	7146339	DER_site	90	+	1.64	444.91	94.26	89.53	10.22	0.60	24.18	0.02
1	7146339	7146340	DER_site	41	+	0.69	216.89	45.06	40.88	22.87	0.03	25.41	0.01
1	7146340	7146341	DER_site	66	+	0.77	335.68	70.67	66.14	47.07	0.00	16.69	0.16
1	7146341	7146342	DER_site	47	+	0.98	245.91	51.30	47.03	30.50	0.00	11.62	0.48
1	7146416	7146417	DER_site	18	+	1.42	109.88	22.11	18.38	21.42	0.04	11.70	0.47
1	7149625	7149626	DER_site	2	+	2.74	22.55	4.30	1.54	8.03	0.53	9.58	0.39
1	7158278	7158279	DER_site	3	-	2.24	27.91	5.42	2.53	9.30	0.03	6.20	0.72
1	7158345	7158346	DER_site	2	-	1.36	20.81	4.52	1.73	4.73	0.58	6.66	0.35
1	7158411	7158412	DER_site	4	-	1.94	36.27	6.59	3.60	7.84	0.55	7.35	0.60
1	7164407	7164408	DER_site	1	-	2.84	23.67	4.03	1.31	1.65	0.95	8.88	0.71
1	7178651	7178652	DER_site	8	+	1.23	57.81	11.08	7.77	7.98	0.54	17.51	0.13
1	7178670	7178671	DER_site	2	+	-0.77	24.06	4.61	1.82	8.73	0.46	8.50	0.48
1	7178671	7178672	DER_site	2	+	-0.80	26.86	4.67	1.87	7.42	0.83	10.36	0.58
1	7178674	7178675	DER_site	20	+	2.58	115.59	23.33	19.56	8.27	0.76	14.33	0.28
1	7178675	7178676	DER_site	15	+	1.68	89.01	18.45	14.82	5.85	0.75	14.49	0.11
1	7178676	7178677	DER_site	51	+	2.45	263.97	55.20	50.87	9.58	0.39	9.50	0.66
1	7178704	7178705	DER_site	5	+	1.11	38.97	7.75	4.66	11.94	0.22	3.95	0.91
1	7181321	7181322	DER_site	24	+	2.44	134.76	27.43	23.56	17.96	0.12	9.66	0.65
1	7181373	7181374	DER_site	19	+	2.36	112.17	22.60	18.86	8.25	0.51	9.91	0.62
1	7181377	7181378	DER_site	1	+	1.55	22.03	4.19	1.45	5.28	0.81	2.51	0.87
1	7181382	7181383	DER_site	1	+	1.38	24.42	4.18	1.44	12.07	0.21	3.77	0.93
1	7181400	7181401	DER_site	4	+	1.16	38.34	7.02	3.99	17.59	0.13	7.69	0.81
1	7214877	7214878	DER_site	11	+	3.93	72.64	14.20	10.75	17.59	0.13	12.48	0.41
1	7214879	7214880	DER_site	2	+	2.14	28.23	4.95	2.11	7.56	0.58	6.75	0.87
1	7233457	7233458	DER_site	4	+	2.21	37.87	6.92	3.90	17.93	0.04	7.89	0.79
1	7233458	7233459	DER_site	3	+	2.43	32.43	5.81	2.88	7.43	0.83	6.68	0.67
1	7233530	7233531	DER_site	4	+	2.41	38.89	7.13	4.09	5.98	0.74	10.25	0.59
1	7297316	7297317	DER_site	4	-	2.79	37.11	7.36	4.30	3.70	0.72	9.51	0.39
1	7297447	7297448	DER_site	5	-	3.65	44.41	8.28	5.15	5.22	0.52	11.97	0.45
1	7301805	7301806	DER_site	4	-	2.59	35.49	7.02	3.99	8.68	0.47	4.76	0.85
1	7301824	7301825	DER_site	3	-	1.50	32.29	6.34	3.37	12.94	0.04	5.28	0.81
1	7301847	7301848	DER_site	2	-	2.14	24.82	4.77	1.96	7.32	0.29	10.79	0.29
1	7301854	7301855	DER_site	2	-	1.81	26.53	4.61	1.81	11.51	0.49	11.89	0.45
1	7319342	7319343	DER_site	3	+	3.30	30.54	5.42	2.53	7.39	0.60	9.61	0.65
1	7329293	7329294	DER_site	2	+	2.60	29.02	5.11	2.26	11.94	0.22	9.07	0.43
1	7375694	7375695	DER_site	6	+	0.44	45.40	9.12	5.93	13.03	0.16	9.34	0.41
1	7375695	7375696	DER_site	5	+	0.22	39.21	7.81	4.71	8.16	0.52	5.95	0.74
1	7375714	7375715	DER_site	1	+	1.94	24.56	4.21	1.46	10.40	0.32	6.95	0.86
1	7375716	7375717	DER_site	13	+	1.80	81.77	16.13	12.60	15.80	0.20	13.07	0.36
1	7375717	7375718	DER_site	6	+	1.34	48.52	9.13	5.94	12.48	0.41	9.22	0.68
1	7375718	7375719	DER_site	7	+	1.62	52.45	9.95	6.72	18.15	0.11	14.12	0.29
1	7375719	7375720	DER_site	5	+	1.77	45.64	8.53	5.39	16.01	0.19	7.29	0.84
1	7375720	7375721	DER_site	39	+	2.77	207.05	42.94	38.79	12.87	0.38	15.08	0.24
1	7375721	7375722	DER_site	6	+	1.51	48.40	9.11	5.92	9.03	0.70	12.87	0.38
1	7375722	7375723	DER_site	3	+	-0.67	34.83	6.30	3.33	9.64	0.65	14.25	0.28
1	7375732	7375733	DER_site	4	+	1.48	37.18	7.37	4.31	4.06	0.67	11.06	0.09
1	7375733	7375734	DER_site	3	+	2.23	29.00	5.65	2.74	0.77	0.86	5.20	0.82
1	7375734	7375735	DER_site	16	+	2.96	97.98	19.58	15.92	6.00	0.92	15.71	0.21
1	7375735	7375736	DER_site	24	+	2.64	134.61	28.26	24.37	6.44	0.69	6.17	0.72
1	7375736	7375737	DER_site	4	+	2.10	37.76	7.50	4.43	5.58	0.47	8.43	0.49
1	7378667	7378668	DER_site	7	-	3.13	52.03	9.87	6.63	10.12	0.61	7.81	0.55
1	7378668	7378669	DER_site	2	-	2.76	25.41	4.38	1.61	3.80	0.70	12.37	0.42
1	7378675	7378676	DER_site	3	-	2.51	31.15	5.54	2.64	13.72	0.13	8.29	0.76
1	7477010	7477011	DER_site	2	-	2.60	28.17	4.94	2.10	12.56	0.18	5.68	0.77
1	7477040	7477041	DER_site	3	-	2.51	28.67	5.58	2.68	3.64	0.72	5.89	0.75
1	7477042	7477043	DER_site	3	-	2.39	31.73	5.66	2.75	5.54	0.48	8.27	0.76
1	7485709	7485710	DER_site	3	-	2.62	35.50	6.44	3.45	7.02	0.63	16.70	0.16
1	7496249	7496250	DER_site	2	+	1.80	25.70	4.44	1.66	10.89	0.28	9.12	0.69
1	7496293	7496294	DER_site	4	+	2.09	39.08	7.17	4.13	6.10	0.73	10.08	0.61
1	7496305	7496306	DER_site	8	+	2.10	58.46	11.21	7.91	6.64	0.88	8.34	0.50
1	7529970	7529971	DER_site	4	-	0.93	38.13	6.98	3.95	8.82	0.72	10.41	0.58
1	7529971	7529972	DER_site	3	-	0.83	33.57	6.04	3.09	6.73	0.67	13.13	0.36
1	7529995	7529996	DER_site	7	-	1.52	50.19	10.14	6.89	8.27	0.51	8.14	0.52
1	7530027	7530028	DER_site	3	-	0.98	31.60	5.64	2.73	7.23	0.84	11.10	0.52
1	7566336	7566337	DER_site	2	-	1.64	27.71	4.85	2.02	6.59	0.68	6.04	0.91
1	7571202	7571203	DER_site	7	-	3.26	54.51	10.39	7.12	13.16	0.36	10.14	0.60
1	7571295	7571296	DER_site	2	-	2.29	24.92	4.28	1.53	8.78	0.46	10.04	0.61
1	7571307	7571308	DER_site	3	-	2.24	34.15	6.16	3.20	10.41	0.11	10.97	0.53
1	7571309	7571310	DER_site	9	-	2.55	61.81	11.92	8.57	10.47	0.58	13.82	0.31
1	7571312	7571313	DER_site	3	-	1.60	35.25	6.38	3.41	7.68	0.26	16.76	0.16
1	7588053	7588054	DER_site	6	+	2.57	46.34	9.32	6.12	3.20	0.78	5.59	0.78
1	7592766	7592767	DER_site	5	+	4.37	35.21	7.65	4.56	3.71	0.30	5.57	0.47
1	7592769	7592770	DER_site	2	+	1.75	24.39	4.68	1.88	4.82	0.57	7.02	0.64
1	7592799	7592800	DER_site	2	+	2.73	26.04	5.03	2.18	7.15	0.31	6.12	0.73
1	7618395	7618396	DER_site	2	+	3.19	28.35	4.97	2.14	7.81	0.55	6.21	0.72
1	7618406	7618407	DER_site	2	+	2.72	29.09	5.13	2.27	3.90	0.69	5.28	0.81
1	7628169	7628170	DER_site	10	+	1.75	64.77	13.25	9.84	10.97	0.09	5.80	0.76
1	7628185	7628186	DER_site	5	+	2.90	42.26	7.83	4.74	3.42	0.76	5.00	0.96
1	7628190	7628191	DER_site	2	+	2.21	25.15	4.33	1.57	14.82	0.25	7.67	0.81
1	7628191	7628192	DER_site	2	+	2.73	26.52	4.60	1.81	8.16	0.23	7.54	0.58
1	7628193	7628194	DER_site	3	+	0.83	30.80	5.47	2.58	10.27	0.59	11.95	0.45
1	7628194	7628195	DER_site	2	+	1.61	23.71	4.54	1.75	4.73	0.58	3.30	0.95
1	7628206	7628207	DER_site	12	+	2.43	77.19	15.16	11.67	11.53	0.48	5.34	0.80
1	7628213	7628214	DER_site	23	+	3.56	127.67	26.76	22.91	8.19	0.22	6.67	0.67
1	7628215	7628216	DER_site	10	+	0.22	66.02	13.52	10.09	9.43	0.40	5.36	0.80
1	7648630	7648631	DER_site	2	+	1.88	25.66	4.43	1.66	12.34	0.42	10.99	0.53
1	7648632	7648633	DER_site	7	+	2.49	53.06	10.08	6.84	11.47	0.25	4.20	0.98
1	7648687	7648688	DER_site	1	+	1.90	21.43	4.07	1.34	6.85	0.65	9.07	0.43
1	7648746	7648747	DER_site	2	+	0.40	26.33	5.09	2.24	6.98	0.64	9.69	0.38
1	7651767	7651768	DER_site	3	+	3.19	28.93	5.63	2.73	2.69	0.44	6.15	0.72
1	7661278	7661279	DER_site	1	-	1.24	24.05	4.11	1.38	10.95	0.28	4.02	0.91
1	7714343	7714344	DER_site	2	+	2.53	24.75	4.76	1.94	1.18	0.76	5.16	0.82
1	7714344	7714345	DER_site	3	+	2.84	34.72	6.27	3.31	4.38	0.88	7.30	0.84
1	7714346	7714347	DER_site	2	+	2.30	26.65	5.16	2.30	8.37	0.50	4.47	0.88
1	7714372	7714373	DER_site	2	+	2.54	22.84	4.96	2.12	4.30	0.23	13.59	0.03
1	7773148	7773149	DER_site	1	-	2.49	23.64	4.03	1.30	13.95	0.30	8.20	0.77
1	7814814	7814815	DER_site	4	-	3.39	35.86	6.51	3.52	5.58	0.47	10.73	0.55
1	7814926	7814927	DER_site	2	-	2.16	28.66	5.04	2.19	6.59	0.68	8.15	0.77
1	7814928	7814929	DER_site	1	-	1.79	23.95	4.09	1.36	2.46	0.87	12.12	0.44
1	7823858	7823859	DER_site	3	+	3.54	32.52	5.82	2.90	6.95	0.64	10.22	0.33
1	7823860	7823861	DER_site	7	+	3.96	49.73	10.04	6.80	5.40	0.80	6.72	0.67
1	7823889	7823890	DER_site	2	+	3.72	23.92	4.59	1.79	2.07	0.56	6.28	0.71
1	7837638	7837639	DER_site	3	-	2.80	25.23	5.48	2.59	0.34	0.95	4.26	0.64
1	7837717	7837718	DER_site	6	-	3.56	43.94	8.81	5.64	9.49	0.02	5.47	0.79
1	7865977	7865978	DER_site	3	+	2.95	27.91	5.42	2.53	3.40	0.76	9.54	0.39
1	7875568	7875569	DER_site	2	+	3.07	25.37	4.89	2.06	6.08	0.73	9.09	0.43
1	7875596	7875597	DER_site	3	+	3.99	33.27	5.98	3.04	2.28	0.52	11.10	0.52
1	7875701	7875702	DER_site	2	+	2.20	29.13	5.13	2.28	13.80	0.31	6.58	0.88
1	7875702	7875703	DER_site	5	+	2.81	41.63	7.70	4.61	11.34	0.50	8.92	0.71
1	7875703	7875704	DER_site	10	+	3.73	70.66	13.78	10.35	4.13	0.90	6.64	0.88
1	7875719	7875720	DER_site	2	+	2.63	23.95	4.59	1.80	8.84	0.45	10.15	0.34
1	7878996	7878997	DER_site	5	-	1.06	41.72	7.72	4.63	17.29	0.04	16.21	0.18
1	7879000	7879001	DER_site	2	-	0.55	25.39	4.89	2.06	14.38	0.11	9.02	0.44
1	7879016	7879017	DER_site	6	-	1.54	48.86	9.20	6.01	16.39	0.17	13.71	0.13
1	7879017	7879018	DER_site	70	-	3.77	353.80	74.58	70.02	7.68	0.81	12.95	0.37
1	7879020	7879021	DER_site	7	-	1.97	47.47	10.31	7.05	9.24	0.03	3.73	0.71
1	7914748	7914749	DER_site	11	+	2.10	69.60	14.28	10.83	5.19	0.82	10.59	0.31
1	7914898	7914899	DER_site	4	+	2.08	38.21	6.99	3.96	4.77	0.57	5.64	0.77
1	7914915	7914916	DER_site	2	+	1.89	26.85	4.67	1.87	7.09	0.63	12.10	0.21
1	7927037	7927038	DER_site	1	+	4.86	19.43	4.22	1.47	0.00	1.00	6.22	0.40
1	7927038	7927039	DER_site	5	+	1.71	41.76	8.34	5.21	3.53	0.74	12.32	0.20
1	7927044	7927045	DER_site	2	+	1.37	25.58	4.42	1.64	13.84	0.13	8.84	0.72
1	7927050	7927051	DER_site	2	+	1.34	26.55	5.14	2.28	9.00	0.44	5.50	0.79
1	7927057	7927058	DER_site	1	+	0.24	24.51	4.20	1.45	6.68	0.67	10.64	0.56
1	7927109	7927110	DER_site	2	+	3.92	24.38	4.68	1.88	2.16	0.54	8.47	0.49
1	7953134	7953135	DER_site	7	-	4.16	51.39	9.73	6.51	5.43	0.49	9.56	0.65
1	7955615	7955616	DER_site	14	-	3.06	87.12	17.27	13.69	5.28	0.81	13.38	0.34
1	7955642	7955643	DER_site	6	-	2.63	50.79	9.61	6.39	3.61	0.73	10.34	0.59
1	7997663	7997664	DER_site	3	+	4.45	28.35	5.51	2.62	2.39	0.50	9.29	0.41
1	8004211	8004212	DER_site	2	+	1.61	25.99	4.50	1.72	9.12	0.69	12.64	0.18
1	8028209	8028210	DER_site	8	-	1.77	57.93	11.10	7.80	4.89	0.84	5.74	0.77
1	8028232	8028233	DER_site	10	-	3.00	66.77	13.68	10.25	17.66	0.04	4.87	0.85
1	8052755	8052756	DER_site	3	+	1.84	34.96	6.32	3.35	11.88	0.22	7.91	0.79
1	8067486	8067487	DER_site	2	+	2.80	20.57	4.47	1.69	5.76	0.45	4.68	0.59
1	8069230	8069231	DER_site	4	+	2.13	36.07	6.55	3.56	11.15	0.27	17.57	0.13
1	8069231	8069232	DER_site	14	+	2.52	90.41	17.97	14.36	10.19	0.34	7.75	0.80
1	8069243	8069244	DER_site	7	+	1.10	52.29	9.92	6.68	6.23	0.90	6.93	0.86
1	8069256	8069257	DER_site	2	+	0.87	28.77	5.06	2.21	12.46	0.41	7.38	0.83
1	8069257	8069258	DER_site	1	+	0.89	24.68	4.23	1.48	7.22	0.61	15.71	0.20
1	8069295	8069296	DER_site	2	+	1.19	26.57	5.14	2.28	3.07	0.80	5.66	0.77
1	8080374	8080375	DER_site	4	+	1.24	37.22	6.79	3.78	17.26	0.14	13.24	0.35
1	8080415	8080416	DER_site	6	+	1.69	46.78	8.77	5.61	12.81	0.38	12.86	0.38
1	8080455	8080456	DER_site	4	+	1.25	35.76	6.49	3.50	17.18	0.14	11.43	0.49
1	8080583	8080584	DER_site	3	-	1.00	28.40	5.52	2.63	18.66	0.03	9.64	0.38
1	8080596	8080597	DER_site	1	-	0.79	24.32	4.16	1.42	12.69	0.39	8.64	0.73
1	8121976	8121977	DER_site	4	+	2.01	34.51	6.81	3.80	7.85	0.55	5.63	0.78
1	8121983	8121984	DER_site	5	+	2.09	44.33	8.26	5.13	15.22	0.23	8.41	0.75
1	8124957	8124958	DER_site	2	+	4.11	22.34	4.85	2.03	2.14	0.54	1.55	0.96
1	8180619	8180620	DER_site	2	-	0.91	22.35	4.26	1.51	6.67	0.67	7.26	0.61
1	8180620	8180621	DER_site	5	-	2.12	40.24	8.02	4.91	7.74	0.56	7.46	0.59
1	8180621	8180622	DER_site	4	-	2.83	36.57	6.66	3.66	14.11	0.12	3.59	0.94
1	8180645	8180646	DER_site	8	-	2.23	59.16	11.36	8.04	14.16	0.29	7.38	0.83
1	8180646	8180647	DER_site	33	-	2.30	178.45	36.79	32.73	9.04	0.70	3.60	0.99
1	8224316	8224317	DER_site	6	+	2.47	45.81	9.21	6.01	5.54	0.48	3.47	0.94
1	8224323	8224324	DER_site	6	+	1.96	51.03	9.66	6.44	10.84	0.54	9.47	0.66
1	8224324	8224325	DER_site	8	+	2.14	59.90	11.52	8.19	12.87	0.38	4.86	0.85
1	8224356	8224357	DER_site	4	+	1.73	39.64	7.29	4.24	6.25	0.71	10.67	0.56
1	8257095	8257096	DER_site	2	-	2.40	27.16	5.26	2.39	8.00	0.53	3.61	0.73
1	8257121	8257122	DER_site	6	-	1.75	46.95	8.81	5.64	10.30	0.33	9.60	0.65
1	8257152	8257153	DER_site	2	-	1.69	24.82	4.77	1.96	3.76	0.71	11.84	0.22
1	8260818	8260819	DER_site	3	-	2.39	26.82	5.82	2.90	1.95	0.58	3.39	0.76
1	8263493	8263494	DER_site	14	+	1.25	88.55	17.57	13.98	9.98	0.62	3.00	0.96
1	8263510	8263511	DER_site	96	+	1.33	475.96	100.98	96.19	17.62	0.13	9.59	0.65
1	8263511	8263512	DER_site	16	+	1.52	99.39	19.88	16.21	13.67	0.32	29.52	0.00
1	8263524	8263525	DER_site	5	+	1.43	43.79	8.15	5.03	4.91	0.55	9.42	0.67
1	8263525	8263526	DER_site	20	+	0.85	116.28	23.48	19.71	4.85	0.85	9.81	0.63
1	8263547	8263548	DER_site	20	+	2.13	115.65	23.34	19.57	10.98	0.53	8.13	0.77
1	8263549	8263550	DER_site	4	+	-0.45	40.28	7.42	4.36	12.95	0.37	7.55	0.58
1	8268548	8268549	DER_site	56	-	1.20	289.39	60.68	56.26	20.36	0.06	15.42	0.22
1	8268584	8268585	DER_site	8	-	0.62	57.99	11.12	7.81	12.59	0.40	21.29	0.05
1	8268585	8268586	DER_site	5	-	0.40	44.25	8.24	5.12	23.39	0.01	18.75	0.09
1	8268586	8268587	DER_site	47	-	1.08	245.22	51.16	46.88	19.09	0.09	2.84	0.97
1	8268587	8268588	DER_site	18	-	1.29	105.60	22.01	18.29	8.38	0.50	10.24	0.33
1	8268623	8268624	DER_site	14	-	0.95	91.01	18.09	14.48	29.30	0.00	20.30	0.06
1	8268624	8268625	DER_site	12	-	0.70	79.50	15.65	12.14	46.34	0.00	16.13	0.19
1	8268625	8268626	DER_site	140	-	1.97	682.38	145.64	140.47	13.99	0.30	7.61	0.57
1	8268626	8268627	DER_site	191	-	1.78	915.33	196.10	190.64	22.97	0.03	12.46	0.41
1	8268627	8268628	DER_site	220	-	2.12	1050.75	225.45	219.90	14.92	0.25	28.06	0.01
1	8268628	8268629	DER_site	34	-	1.31	185.83	38.38	34.29	13.68	0.32	17.93	0.12
1	8268632	8268633	DER_site	4	-	-0.16	35.91	6.52	3.53	21.19	0.05	13.89	0.31
1	8268643	8268644	DER_site	20	-	-0.53	116.22	23.46	19.69	16.57	0.17	12.23	0.43
1	8268649	8268650	DER_site	15	-	0.09	92.22	18.35	14.73	29.44	0.00	11.45	0.49
1	8268651	8268652	DER_site	70	-	1.21	356.01	75.05	70.49	20.57	0.06	18.08	0.11
1	8268652	8268653	DER_site	119	-	1.32	582.39	124.00	119.01	31.70	0.00	11.28	0.51
1	8268653	8268654	DER_site	136	-	1.64	661.15	141.05	135.93	20.69	0.06	14.05	0.30
1	8268654	8268655	DER_site	18	-	1.28	106.01	21.29	17.58	21.35	0.05	14.27	0.28
1	8268655	8268656	DER_site	19	-	0.80	114.10	23.01	19.26	30.06	0.00	6.42	0.89
1	8268656	8268657	DER_site	3	-	0.72	33.54	6.03	3.09	10.90	0.54	10.15	0.60
1	8268658	8268659	DER_site	85	-	-1.01	423.95	89.73	85.03	44.49	0.00	30.15	0.00
1	8268659	8268660	DER_site	5	-	-0.28	45.77	8.56	5.41	12.13	0.44	23.62	0.02
1	8268677	8268678	DER_site	45	-	-0.65	238.12	49.63	45.38	59.81	0.00	10.39	0.58
1	8268679	8268680	DER_site	47	-	0.90	247.87	51.73	47.45	11.70	0.47	21.81	0.04
1	8268680	8268681	DER_site	115	-	1.08	556.90	119.65	114.72	25.71	0.00	28.53	0.00
1	8268681	8268682	DER_site	98	-	1.11	486.23	103.20	98.40	15.21	0.23	30.19	0.00
1	8268682	8268683	DER_site	22	-	0.83	124.06	25.99	22.15	8.83	0.45	28.89	0.00
1	8268684	8268685	DER_site	10	-	0.75	68.57	13.34	9.93	8.25	0.77	18.62	0.10
1	8268686	8268687	DER_site	32	-	0.79	173.60	35.75	31.71	20.45	0.06	33.99	0.00
1	8268700	8268701	DER_site	2	-	0.67	30.07	5.32	2.45	20.83	0.05	3.73	0.99
1	8268703	8268704	DER_site	7	-	1.34	55.34	10.56	7.29	5.93	0.75	6.91	0.86
1	8312134	8312135	DER_site	2	-	1.75	22.94	4.38	1.61	8.69	0.47	10.45	0.32
1	8312135	8312136	DER_site	2	-	3.08	22.73	4.34	1.57	4.88	0.18	6.20	0.72
[truncated: 19,017 more rows]
