# Supplementary material for: Nanopore direct RNA sequencing maps the complexity of Arabidopsis mRNA processing and m6A modification
Source: eLife. 2020 Jan 14;9:e49658. doi: 10.7554/eLife.49658 (PMC6959997; doi:10.7554/eLife.49658)
Supplement: Figure 5—source data 2. [file elife-49658-fig5-data2.tds]

#chrom	source	type	start	end	score	strand	frame	attributes
1	fimo	nucleotide_motif	47575	47581	27.4	-	.	Name=DARACWW_1:47570-47585(-)+;Alias=MEME-1;ID=DARACWW-MEME-1-1-1:47570-47585(-);pvalue=0.0018;qvalue=0.0746;sequence=TAAACTA;
1	fimo	nucleotide_motif	50188	50194	24	-	.	Name=DARACWW_1:50184-50197(-)+;Alias=MEME-1;ID=DARACWW-MEME-1-1-1:50184-50197(-);pvalue=0.00402;qvalue=0.0901;sequence=AGGACTA;
1	fimo	nucleotide_motif	50238	50244	29.7	-	.	Name=DARACWW_1:50232-50252(-)+;Alias=MEME-1;ID=DARACWW-MEME-1-1-1:50232-50252(-);pvalue=0.00108;qvalue=0.0664;sequence=GAGACTA;
1	fimo	nucleotide_motif	121170	121176	28.2	-	.	Name=DARACWW_1:121166-121179(-)+;Alias=MEME-1;ID=DARACWW-MEME-1-1-1:121166-121179(-);pvalue=0.00151;qvalue=0.0732;sequence=TAAACAT;
1	fimo	nucleotide_motif	121205	121211	25.5	-	.	Name=DARACWW_1:121199-121212(-)+;Alias=MEME-1;ID=DARACWW-MEME-1-1-1:121199-121212(-);pvalue=0.00281;qvalue=0.0801;sequence=TGGACAT;
1	fimo	nucleotide_motif	137999	138005	26.5	+	.	Name=DARACWW_1:137992-138005(+)+;Alias=MEME-1;ID=DARACWW-MEME-1-1-1:137992-138005(+);pvalue=0.00222;qvalue=0.0769;sequence=AAAACTA;
1	fimo	nucleotide_motif	180304	180310	41.1	-	.	Name=DARACWW_1:180302-180315(-)+;Alias=MEME-1;ID=DARACWW-MEME-1-1-1:180302-180315(-);pvalue=7.71e-05;qvalue=0.0467;sequence=TAGACTT;
1	fimo	nucleotide_motif	180322	180328	23.3	-	.	Name=DARACWW_1:180318-180331(-)+;Alias=MEME-1;ID=DARACWW-MEME-1-1-1:180318-180331(-);pvalue=0.00471;qvalue=0.0905;sequence=GAAACAA;
1	fimo	nucleotide_motif	189927	189933	24.6	+	.	Name=DARACWW_1:189923-189936(+)+;Alias=MEME-1;ID=DARACWW-MEME-1-1-1:189923-189936(+);pvalue=0.00348;qvalue=0.0846;sequence=GAGACAC;
1	fimo	nucleotide_motif	189950	189956	25.2	+	.	Name=DARACWW_1:189946-189959(+)+;Alias=MEME-1;ID=DARACWW-MEME-1-1-1:189946-189959(+);pvalue=0.003;qvalue=0.0822;sequence=GAGACTG;
1	fimo	nucleotide_motif	221806	221812	26.7	-	.	Name=DARACWW_1:221802-221815(-)+;Alias=MEME-1;ID=DARACWW-MEME-1-1-1:221802-221815(-);pvalue=0.00212;qvalue=0.0766;sequence=GAAACTA;
1	fimo	nucleotide_motif	225880	225886	30.2	-	.	Name=DARACWW_1:225876-225889(-)+;Alias=MEME-1;ID=DARACWW-MEME-1-1-1:225876-225889(-);pvalue=0.000945;qvalue=0.0635;sequence=TGGACTT;
1	fimo	nucleotide_motif	230752	230758	27.7	+	.	Name=DARACWW_1:230745-230758(+)+;Alias=MEME-1;ID=DARACWW-MEME-1-1-1:230745-230758(+);pvalue=0.0017;qvalue=0.0732;sequence=AAAACAT;
1	fimo	nucleotide_motif	266134	266140	25.7	+	.	Name=DARACWW_1:266128-266141(+)+;Alias=MEME-1;ID=DARACWW-MEME-1-1-1:266128-266141(+);pvalue=0.00267;qvalue=0.0794;sequence=TAGACAA;
1	fimo	nucleotide_motif	330642	330648	22.1	-	.	Name=DARACWW_1:330639-330652(-)+;Alias=MEME-1;ID=DARACWW-MEME-1-1-1:330639-330652(-);pvalue=0.00612;qvalue=0.0968;sequence=TAGACAG;
1	fimo	nucleotide_motif	386757	386763	21.9	+	.	Name=DARACWW_1:386754-386767(+)+;Alias=MEME-1;ID=DARACWW-MEME-1-1-1:386754-386767(+);pvalue=0.00642;qvalue=0.0978;sequence=GAGATTT;
1	fimo	nucleotide_motif	403406	403412	28.9	-	.	Name=DARACWW_1:403402-403416(-)+;Alias=MEME-1;ID=DARACWW-MEME-1-1-1:403402-403416(-);pvalue=0.00128;qvalue=0.0722;sequence=AGGACTT;
1	fimo	nucleotide_motif	410521	410527	25.2	+	.	Name=DARACWW_1:410517-410530(+)+;Alias=MEME-1;ID=DARACWW-MEME-1-1-1:410517-410530(+);pvalue=0.003;qvalue=0.0822;sequence=GAGACTG;
1	fimo	nucleotide_motif	411484	411490	23.7	+	.	Name=DARACWW_1:411478-411491(+)+;Alias=MEME-1;ID=DARACWW-MEME-1-1-1:411478-411491(+);pvalue=0.00431;qvalue=0.0905;sequence=TAAACAA;
1	fimo	nucleotide_motif	448525	448531	21.9	-	.	Name=DARACWW_1:448520-448533(-)+;Alias=MEME-1;ID=DARACWW-MEME-1-1-1:448520-448533(-);pvalue=0.00642;qvalue=0.0978;sequence=GAGATTT;
1	fimo	nucleotide_motif	539922	539928	22.1	+	.	Name=DARACWW_1:539916-539932(+)+;Alias=MEME-1;ID=DARACWW-MEME-1-1-1:539916-539932(+);pvalue=0.00612;qvalue=0.0968;sequence=CAAACTC;
1	fimo	nucleotide_motif	608002	608008	22.8	-	.	Name=DARACWW_1:607998-608011(-)+;Alias=MEME-1;ID=DARACWW-MEME-1-1-1:607998-608011(-);pvalue=0.0053;qvalue=0.093;sequence=AGAACAT;
1	fimo	nucleotide_motif	655679	655685	21.7	-	.	Name=DARACWW_1:655673-655686(-)+;Alias=MEME-1;ID=DARACWW-MEME-1-1-1:655673-655686(-);pvalue=0.00677;qvalue=0.0998;sequence=AGAACTC;
1	fimo	nucleotide_motif	655701	655707	22.2	-	.	Name=DARACWW_1:655697-655711(-)+;Alias=MEME-1;ID=DARACWW-MEME-1-1-1:655697-655711(-);pvalue=0.00599;qvalue=0.0965;sequence=AAAACCT;
1	fimo	nucleotide_motif	704046	704052	36.5	-	.	Name=DARACWW_1:704042-704055(-)+;Alias=MEME-1;ID=DARACWW-MEME-1-1-1:704042-704055(-);pvalue=0.000224;qvalue=0.0467;sequence=AAGACTT;
1	fimo	nucleotide_motif	712625	712631	22.5	-	.	Name=DARACWW_1:712622-712635(-)+;Alias=MEME-1;ID=DARACWW-MEME-1-1-1:712622-712635(-);pvalue=0.00567;qvalue=0.0952;sequence=AAAACAC;
1	fimo	nucleotide_motif	753523	753529	21.9	-	.	Name=DARACWW_1:753518-753531(-)+;Alias=MEME-1;ID=DARACWW-MEME-1-1-1:753518-753531(-);pvalue=0.00652;qvalue=0.0978;sequence=AAGATTT;
1	fimo	nucleotide_motif	766044	766050	38.4	+	.	Name=DARACWW_1:766040-766053(+)+;Alias=MEME-1;ID=DARACWW-MEME-1-1-1:766040-766053(+);pvalue=0.000143;qvalue=0.0467;sequence=GAGACTT;
1	fimo	nucleotide_motif	793485	793491	28.5	-	.	Name=DARACWW_1:793483-793496(-)+;Alias=MEME-1;ID=DARACWW-MEME-1-1-1:793483-793496(-);pvalue=0.00141;qvalue=0.0732;sequence=AAGACTC;
1	fimo	nucleotide_motif	806880	806886	23.3	+	.	Name=DARACWW_1:806874-806887(+)+;Alias=MEME-1;ID=DARACWW-MEME-1-1-1:806874-806887(+);pvalue=0.00471;qvalue=0.0905;sequence=GAAACAA;
1	fimo	nucleotide_motif	869079	869085	33	-	.	Name=DARACWW_1:869072-869085(-)+;Alias=MEME-1;ID=DARACWW-MEME-1-1-1:869072-869085(-);pvalue=0.0005;qvalue=0.0508;sequence=AAAACTT;
1	fimo	nucleotide_motif	869107	869113	22.8	-	.	Name=DARACWW_1:869103-869118(-)+;Alias=MEME-1;ID=DARACWW-MEME-1-2-1:869103-869118(-);pvalue=0.0053;qvalue=0.093;sequence=CAAACTA;
1	fimo	nucleotide_motif	869111	869117	24.9	-	.	Name=DARACWW_1:869103-869118(-)+;Alias=MEME-1;ID=DARACWW-MEME-1-1-1:869103-869118(-);pvalue=0.00323;qvalue=0.0822;sequence=AAGACAA;
1	fimo	nucleotide_motif	909318	909324	24.7	+	.	Name=DARACWW_1:909310-909325(+)+;Alias=MEME-1;ID=DARACWW-MEME-1-1-1:909310-909325(+);pvalue=0.00342;qvalue=0.0846;sequence=CAGACTA;
1	fimo	nucleotide_motif	916904	916910	41.1	-	.	Name=DARACWW_1:916898-916911(-)+;Alias=MEME-1;ID=DARACWW-MEME-1-1-1:916898-916911(-);pvalue=7.71e-05;qvalue=0.0467;sequence=TAGACTT;
1	fimo	nucleotide_motif	916983	916989	22.5	-	.	Name=DARACWW_1:916979-916992(-)+;Alias=MEME-1;ID=DARACWW-MEME-1-1-1:916979-916992(-);pvalue=0.00567;qvalue=0.0952;sequence=TGAACTA;
1	fimo	nucleotide_motif	979353	979359	26	-	.	Name=DARACWW_1:979349-979362(-)+;Alias=MEME-1;ID=DARACWW-MEME-1-1-1:979349-979362(-);pvalue=0.00252;qvalue=0.0778;sequence=AAAACTC;
1	fimo	nucleotide_motif	979410	979416	34	-	.	Name=DARACWW_1:979406-979419(-)+;Alias=MEME-1;ID=DARACWW-MEME-1-1-1:979406-979419(-);pvalue=0.0004;qvalue=0.0508;sequence=GAAACTT;
1	fimo	nucleotide_motif	979468	979474	24.7	-	.	Name=DARACWW_1:979462-979475(-)+;Alias=MEME-1;ID=DARACWW-MEME-1-1-1:979462-979475(-);pvalue=0.00342;qvalue=0.0846;sequence=AGGACAT;
1	fimo	nucleotide_motif	1000274	1000280	36.5	+	.	Name=DARACWW_1:1000268-1000281(+)+;Alias=MEME-1;ID=DARACWW-MEME-1-1-1:1000268-1000281(+);pvalue=0.000224;qvalue=0.0467;sequence=AAGACTT;
1	fimo	nucleotide_motif	1075653	1075659	22.2	-	.	Name=DARACWW_1:1075647-1075660(-)+;Alias=MEME-1;ID=DARACWW-MEME-1-1-1:1075647-1075660(-);pvalue=0.00599;qvalue=0.0965;sequence=ATGACTT;
1	fimo	nucleotide_motif	1106564	1106570	29.3	-	.	Name=DARACWW_1:1106562-1106576(-)+;Alias=MEME-1;ID=DARACWW-MEME-1-1-1:1106562-1106576(-);pvalue=0.00116;qvalue=0.0681;sequence=AAGACTA;
1	fimo	nucleotide_motif	1138512	1138518	27.1	+	.	Name=DARACWW_1:1138507-1138520(+)+;Alias=MEME-1;ID=DARACWW-MEME-1-1-1:1138507-1138520(+);pvalue=0.00195;qvalue=0.0766;sequence=TGAACTT;
1	fimo	nucleotide_motif	1138532	1138538	31.9	+	.	Name=DARACWW_1:1138526-1138539(+)+;Alias=MEME-1;ID=DARACWW-MEME-1-1-1:1138526-1138539(+);pvalue=0.000651;qvalue=0.0555;sequence=GAGACAT;
1	fimo	nucleotide_motif	1143622	1143628	24.9	-	.	Name=DARACWW_1:1143618-1143631(-)+;Alias=MEME-1;ID=DARACWW-MEME-1-1-1:1143618-1143631(-);pvalue=0.00323;qvalue=0.0822;sequence=TAGACCT;
1	fimo	nucleotide_motif	1143627	1143633	22.5	-	.	Name=DARACWW_1:1143620-1143633(-)+;Alias=MEME-1;ID=DARACWW-MEME-1-2-1:1143620-1143633(-);pvalue=0.00567;qvalue=0.0952;sequence=TGAACTA;
1	fimo	nucleotide_motif	1166545	1166551	23	+	.	Name=DARACWW_1:1166536-1166551(+)+;Alias=MEME-1;ID=DARACWW-MEME-1-1-1:1166536-1166551(+);pvalue=0.00506;qvalue=0.0905;sequence=AAAACAA;
1	fimo	nucleotide_motif	1166675	1166681	23	+	.	Name=DARACWW_1:1166668-1166681(+)+;Alias=MEME-1;ID=DARACWW-MEME-1-1-1:1166668-1166681(+);pvalue=0.00506;qvalue=0.0905;sequence=AAAACAA;
1	fimo	nucleotide_motif	1185612	1185618	28.2	-	.	Name=DARACWW_1:1185606-1185619(-)+;Alias=MEME-1;ID=DARACWW-MEME-1-1-1:1185606-1185619(-);pvalue=0.00151;qvalue=0.0732;sequence=TAAACAT;
1	fimo	nucleotide_motif	1205746	1205752	23.3	+	.	Name=DARACWW_1:1205740-1205753(+)+;Alias=MEME-1;ID=DARACWW-MEME-1-1-1:1205740-1205753(+);pvalue=0.00471;qvalue=0.0905;sequence=GAAACAA;
1	fimo	nucleotide_motif	1205750	1205756	23.6	+	.	Name=DARACWW_1:1205744-1205757(+)+;Alias=MEME-1;ID=DARACWW-MEME-1-1-1:1205744-1205757(+);pvalue=0.00439;qvalue=0.0905;sequence=CAAACAT;
1	fimo	nucleotide_motif	1315484	1315490	27.7	+	.	Name=DARACWW_1:1315477-1315491(+)+;Alias=MEME-1;ID=DARACWW-MEME-1-1-1:1315477-1315491(+);pvalue=0.0017;qvalue=0.0732;sequence=AAAACAT;
1	fimo	nucleotide_motif	1315573	1315579	28.5	+	.	Name=DARACWW_1:1315565-1315580(+)+;Alias=MEME-1;ID=DARACWW-MEME-1-1-1:1315565-1315580(+);pvalue=0.00141;qvalue=0.0732;sequence=AAGACTC;
1	fimo	nucleotide_motif	1315595	1315601	29.7	+	.	Name=DARACWW_1:1315589-1315604(+)+;Alias=MEME-1;ID=DARACWW-MEME-1-1-1:1315589-1315604(+);pvalue=0.00108;qvalue=0.0664;sequence=GAGACTA;
1	fimo	nucleotide_motif	1331646	1331652	26.7	-	.	Name=DARACWW_1:1331642-1331655(-)+;Alias=MEME-1;ID=DARACWW-MEME-1-1-1:1331642-1331655(-);pvalue=0.00212;qvalue=0.0766;sequence=GAAACTA;
1	fimo	nucleotide_motif	1331737	1331743	32.3	-	.	Name=DARACWW_1:1331735-1331749(-)+;Alias=MEME-1;ID=DARACWW-MEME-1-1-1:1331735-1331749(-);pvalue=0.000582;qvalue=0.0548;sequence=TAGACAT;
1	fimo	nucleotide_motif	1331837	1331843	33	-	.	Name=DARACWW_1:1331831-1331844(-)+;Alias=MEME-1;ID=DARACWW-MEME-1-1-1:1331831-1331844(-);pvalue=0.0005;qvalue=0.0508;sequence=AAAACTT;
1	fimo	nucleotide_motif	1340685	1340691	22.5	-	.	Name=DARACWW_1:1340681-1340694(-)+;Alias=MEME-1;ID=DARACWW-MEME-1-1-1:1340681-1340694(-);pvalue=0.00567;qvalue=0.0952;sequence=GTGACTT;
1	fimo	nucleotide_motif	1355336	1355342	29.7	+	.	Name=DARACWW_1:1355332-1355345(+)+;Alias=MEME-1;ID=DARACWW-MEME-1-1-1:1355332-1355345(+);pvalue=0.00108;qvalue=0.0664;sequence=GAGACTA;
1	fimo	nucleotide_motif	1356311	1356317	22.2	-	.	Name=DARACWW_1:1356307-1356321(-)+;Alias=MEME-1;ID=DARACWW-MEME-1-1-1:1356307-1356321(-);pvalue=0.00599;qvalue=0.0965;sequence=AAAACCT;
1	fimo	nucleotide_motif	1356345	1356351	26	-	.	Name=DARACWW_1:1356340-1356354(-)+;Alias=MEME-1;ID=DARACWW-MEME-1-1-1:1356340-1356354(-);pvalue=0.00252;qvalue=0.0778;sequence=AAAACTC;
1	fimo	nucleotide_motif	1365286	1365292	26.7	-	.	Name=DARACWW_1:1365282-1365295(-)+;Alias=MEME-1;ID=DARACWW-MEME-1-1-1:1365282-1365295(-);pvalue=0.00212;qvalue=0.0766;sequence=GAAACTA;
1	fimo	nucleotide_motif	1373346	1373352	22.2	-	.	Name=DARACWW_1:1373341-1373354(-)+;Alias=MEME-1;ID=DARACWW-MEME-1-1-1:1373341-1373354(-);pvalue=0.00599;qvalue=0.0965;sequence=TAGATTT;
1	fimo	nucleotide_motif	1416389	1416395	24.3	-	.	Name=DARACWW_1:1416385-1416398(-)+;Alias=MEME-1;ID=DARACWW-MEME-1-1-1:1416385-1416398(-);pvalue=0.00367;qvalue=0.0857;sequence=TGGACTA;
1	fimo	nucleotide_motif	1484026	1484032	23.3	+	.	Name=DARACWW_1:1484020-1484033(+)+;Alias=MEME-1;ID=DARACWW-MEME-1-1-1:1484020-1484033(+);pvalue=0.00471;qvalue=0.0905;sequence=GAAACAA;
1	fimo	nucleotide_motif	1484143	1484149	25.2	-	.	Name=DARACWW_1:1484139-1484152(-)+;Alias=MEME-1;ID=DARACWW-MEME-1-1-1:1484139-1484152(-);pvalue=0.003;qvalue=0.0822;sequence=GAGACTG;
1	fimo	nucleotide_motif	1629081	1629087	24	+	.	Name=DARACWW_1:1629077-1629090(+)+;Alias=MEME-1;ID=DARACWW-MEME-1-1-1:1629077-1629090(+);pvalue=0.00395;qvalue=0.0888;sequence=TGGACTC;
1	fimo	nucleotide_motif	1631001	1631007	29.3	-	.	Name=DARACWW_1:1630999-1631013(-)+;Alias=MEME-1;ID=DARACWW-MEME-1-1-1:1630999-1631013(-);pvalue=0.00116;qvalue=0.0681;sequence=AAGACTA;
1	fimo	nucleotide_motif	1717591	1717597	22.5	-	.	Name=DARACWW_1:1717585-1717598(-)+;Alias=MEME-1;ID=DARACWW-MEME-1-1-1:1717585-1717598(-);pvalue=0.00567;qvalue=0.0952;sequence=AAAACAC;
1	fimo	nucleotide_motif	1766617	1766623	28	-	.	Name=DARACWW_1:1766613-1766626(-)+;Alias=MEME-1;ID=DARACWW-MEME-1-1-1:1766613-1766626(-);pvalue=0.00159;qvalue=0.0732;sequence=GAAACAT;
1	fimo	nucleotide_motif	1766721	1766727	26.2	-	.	Name=DARACWW_1:1766714-1766728(-)+;Alias=MEME-1;ID=DARACWW-MEME-1-1-1:1766714-1766728(-);pvalue=0.00237;qvalue=0.0778;sequence=AGAACTT;
1	fimo	nucleotide_motif	1784327	1784333	24.9	+	.	Name=DARACWW_1:1784321-1784334(+)+;Alias=MEME-1;ID=DARACWW-MEME-1-1-1:1784321-1784334(+);pvalue=0.00323;qvalue=0.0822;sequence=AAGACTG;
1	fimo	nucleotide_motif	1801224	1801230	28.2	-	.	Name=DARACWW_1:1801218-1801231(-)+;Alias=MEME-1;ID=DARACWW-MEME-1-1-1:1801218-1801231(-);pvalue=0.00151;qvalue=0.0732;sequence=TAAACAT;
1	fimo	nucleotide_motif	1828633	1828639	32.3	-	.	Name=DARACWW_1:1828629-1828642(-)+;Alias=MEME-1;ID=DARACWW-MEME-1-1-1:1828629-1828642(-);pvalue=0.000582;qvalue=0.0548;sequence=TAGACAT;
1	fimo	nucleotide_motif	1894410	1894416	23.7	-	.	Name=DARACWW_1:1894406-1894419(-)+;Alias=MEME-1;ID=DARACWW-MEME-1-1-1:1894406-1894419(-);pvalue=0.00431;qvalue=0.0905;sequence=TAAACAA;
1	fimo	nucleotide_motif	1894455	1894461	23	-	.	Name=DARACWW_1:1894451-1894465(-)+;Alias=MEME-1;ID=DARACWW-MEME-1-1-1:1894451-1894465(-);pvalue=0.00506;qvalue=0.0905;sequence=TTGACTT;
1	fimo	nucleotide_motif	1894544	1894550	26.7	-	.	Name=DARACWW_1:1894540-1894553(-)+;Alias=MEME-1;ID=DARACWW-MEME-1-1-1:1894540-1894553(-);pvalue=0.00212;qvalue=0.0766;sequence=TAAACTC;
1	fimo	nucleotide_motif	1904619	1904625	24	+	.	Name=DARACWW_1:1904615-1904628(+)+;Alias=MEME-1;ID=DARACWW-MEME-1-1-1:1904615-1904628(+);pvalue=0.00402;qvalue=0.0901;sequence=AGGACTA;
1	fimo	nucleotide_motif	1904722	1904728	21.9	+	.	Name=DARACWW_1:1904719-1904732(+)+;Alias=MEME-1;ID=DARACWW-MEME-1-1-1:1904719-1904732(+);pvalue=0.00642;qvalue=0.0978;sequence=GAGATTT;
1	fimo	nucleotide_motif	1926077	1926083	23.3	+	.	Name=DARACWW_1:1926071-1926084(+)+;Alias=MEME-1;ID=DARACWW-MEME-1-1-1:1926071-1926084(+);pvalue=0.00471;qvalue=0.0905;sequence=GAAACTG;
1	fimo	nucleotide_motif	1950683	1950689	25.2	+	.	Name=DARACWW_1:1950679-1950692(+)+;Alias=MEME-1;ID=DARACWW-MEME-1-1-1:1950679-1950692(+);pvalue=0.003;qvalue=0.0822;sequence=GAGACAA;
1	fimo	nucleotide_motif	1951043	1951049	25.2	-	.	Name=DARACWW_1:1951039-1951052(-)+;Alias=MEME-1;ID=DARACWW-MEME-1-1-1:1951039-1951052(-);pvalue=0.003;qvalue=0.0822;sequence=GAGACAA;
1	fimo	nucleotide_motif	1960082	1960088	22.1	-	.	Name=DARACWW_1:1960076-1960090(-)+;Alias=MEME-1;ID=DARACWW-MEME-1-1-1:1960076-1960090(-);pvalue=0.00612;qvalue=0.0968;sequence=CAAACTC;
1	fimo	nucleotide_motif	1960203	1960209	24.3	-	.	Name=DARACWW_1:1960199-1960212(-)+;Alias=MEME-1;ID=DARACWW-MEME-1-1-1:1960199-1960212(-);pvalue=0.00367;qvalue=0.0857;sequence=GAGACCT;
1	fimo	nucleotide_motif	1967127	1967133	23.7	-	.	Name=DARACWW_1:1967123-1967136(-)+;Alias=MEME-1;ID=DARACWW-MEME-1-1-1:1967123-1967136(-);pvalue=0.00431;qvalue=0.0905;sequence=TAAACAA;
1	fimo	nucleotide_motif	1990729	1990735	29.7	-	.	Name=DARACWW_1:1990725-1990738(-)+;Alias=MEME-1;ID=DARACWW-MEME-1-1-1:1990725-1990738(-);pvalue=0.00108;qvalue=0.0664;sequence=TAGACTC;
1	fimo	nucleotide_motif	2003726	2003732	22.1	-	.	Name=DARACWW_1:2003721-2003734(-)+;Alias=MEME-1;ID=DARACWW-MEME-1-1-1:2003721-2003734(-);pvalue=0.00612;qvalue=0.0968;sequence=CAAACTC;
1	fimo	nucleotide_motif	2037315	2037321	28.2	+	.	Name=DARACWW_1:2037309-2037324(+)+;Alias=MEME-1;ID=DARACWW-MEME-1-1-1:2037309-2037324(+);pvalue=0.00151;qvalue=0.0732;sequence=TAAACAT;
1	fimo	nucleotide_motif	2049256	2049262	23.3	+	.	Name=DARACWW_1:2049250-2049263(+)+;Alias=MEME-1;ID=DARACWW-MEME-1-1-1:2049250-2049263(+);pvalue=0.00471;qvalue=0.0905;sequence=GAAACTG;
1	fimo	nucleotide_motif	2049324	2049330	24.1	+	.	Name=DARACWW_1:2049318-2049333(+)+;Alias=MEME-1;ID=DARACWW-MEME-1-1-1:2049318-2049333(+);pvalue=0.00384;qvalue=0.0872;sequence=CAGACTC;
1	fimo	nucleotide_motif	2110880	2110886	23.6	+	.	Name=DARACWW_1:2110875-2110888(+)+;Alias=MEME-1;ID=DARACWW-MEME-1-1-1:2110875-2110888(+);pvalue=0.00439;qvalue=0.0905;sequence=CAAACAT;
1	fimo	nucleotide_motif	2158457	2158463	26.5	-	.	Name=DARACWW_1:2158453-2158466(-)+;Alias=MEME-1;ID=DARACWW-MEME-1-1-1:2158453-2158466(-);pvalue=0.00222;qvalue=0.0769;sequence=AAAACTA;
1	fimo	nucleotide_motif	2172012	2172018	22.2	+	.	Name=DARACWW_1:2172008-2172021(+)+;Alias=MEME-1;ID=DARACWW-MEME-1-1-1:2172008-2172021(+);pvalue=0.00599;qvalue=0.0965;sequence=AAAACCT;
1	fimo	nucleotide_motif	2178326	2178332	22.1	-	.	Name=DARACWW_1:2178322-2178335(-)+;Alias=MEME-1;ID=DARACWW-MEME-1-1-1:2178322-2178335(-);pvalue=0.00612;qvalue=0.0968;sequence=CAAACTC;
1	fimo	nucleotide_motif	2192135	2192141	21.9	-	.	Name=DARACWW_1:2192130-2192143(-)+;Alias=MEME-1;ID=DARACWW-MEME-1-1-1:2192130-2192143(-);pvalue=0.00642;qvalue=0.0978;sequence=GAGATTT;
1	fimo	nucleotide_motif	2201124	2201130	31.3	+	.	Name=DARACWW_1:2201118-2201131(+)+;Alias=MEME-1;ID=DARACWW-MEME-1-1-1:2201118-2201131(+);pvalue=0.000737;qvalue=0.0566;sequence=AAGACAT;
1	fimo	nucleotide_motif	2241042	2241048	26	+	.	Name=DARACWW_1:2241040-2241053(+)+;Alias=MEME-1;ID=DARACWW-MEME-1-1-1:2241040-2241053(+);pvalue=0.00252;qvalue=0.0778;sequence=AAAACTC;
1	fimo	nucleotide_motif	2241087	2241093	36.5	+	.	Name=DARACWW_1:2241079-2241094(+)+;Alias=MEME-1;ID=DARACWW-MEME-1-1-1:2241079-2241094(+);pvalue=0.000224;qvalue=0.0467;sequence=AAGACTT;
1	fimo	nucleotide_motif	2250472	2250478	23	+	.	Name=DARACWW_1:2250468-2250481(+)+;Alias=MEME-1;ID=DARACWW-MEME-1-1-1:2250468-2250481(+);pvalue=0.00506;qvalue=0.0905;sequence=TTGACTT;
1	fimo	nucleotide_motif	2294445	2294451	31.9	+	.	Name=DARACWW_1:2294441-2294454(+)+;Alias=MEME-1;ID=DARACWW-MEME-1-1-1:2294441-2294454(+);pvalue=0.000651;qvalue=0.0555;sequence=GAGACAT;
1	fimo	nucleotide_motif	2338670	2338676	23	-	.	Name=DARACWW_1:2338666-2338680(-)+;Alias=MEME-1;ID=DARACWW-MEME-1-1-1:2338666-2338680(-);pvalue=0.00506;qvalue=0.0905;sequence=TTGACTT;
1	fimo	nucleotide_motif	2359826	2359832	24.2	-	.	Name=DARACWW_1:2359822-2359835(-)+;Alias=MEME-1;ID=DARACWW-MEME-1-1-1:2359822-2359835(-);pvalue=0.00379;qvalue=0.0872;sequence=CGGACTT;
1	fimo	nucleotide_motif	2370272	2370278	29.7	-	.	Name=DARACWW_1:2370270-2370283(-)+;Alias=MEME-1;ID=DARACWW-MEME-1-1-1:2370270-2370283(-);pvalue=0.00108;qvalue=0.0664;sequence=TAGACTC;
1	fimo	nucleotide_motif	2381244	2381250	21.8	+	.	Name=DARACWW_1:2381237-2381251(+)+;Alias=MEME-1;ID=DARACWW-MEME-1-1-1:2381237-2381251(+);pvalue=0.00665;qvalue=0.0986;sequence=AAGACAG;
1	fimo	nucleotide_motif	2408252	2408258	41.1	-	.	Name=DARACWW_1:2408250-2408263(-)+;Alias=MEME-1;ID=DARACWW-MEME-1-1-1:2408250-2408263(-);pvalue=7.71e-05;qvalue=0.0467;sequence=TAGACTT;
1	fimo	nucleotide_motif	2408340	2408346	26.7	-	.	Name=DARACWW_1:2408334-2408347(-)+;Alias=MEME-1;ID=DARACWW-MEME-1-1-1:2408334-2408347(-);pvalue=0.00212;qvalue=0.0766;sequence=GAAACTA;
1	fimo	nucleotide_motif	2423600	2423606	24.6	+	.	Name=DARACWW_1:2423596-2423609(+)+;Alias=MEME-1;ID=DARACWW-MEME-1-1-1:2423596-2423609(+);pvalue=0.00348;qvalue=0.0846;sequence=GAGACAC;
1	fimo	nucleotide_motif	2439623	2439629	25.2	+	.	Name=DARACWW_1:2439618-2439632(+)+;Alias=MEME-1;ID=DARACWW-MEME-1-1-1:2439618-2439632(+);pvalue=0.003;qvalue=0.0822;sequence=TAGACAC;
1	fimo	nucleotide_motif	2460471	2460477	26	+	.	Name=DARACWW_1:2460469-2460482(+)+;Alias=MEME-1;ID=DARACWW-MEME-1-1-1:2460469-2460482(+);pvalue=0.00252;qvalue=0.0778;sequence=AAAACTC;
1	fimo	nucleotide_motif	2460496	2460502	23	+	.	Name=DARACWW_1:2460487-2460502(+)+;Alias=MEME-1;ID=DARACWW-MEME-1-1-1:2460487-2460502(+);pvalue=0.00506;qvalue=0.0905;sequence=AAAACAA;
1	fimo	nucleotide_motif	2463306	2463312	24	-	.	Name=DARACWW_1:2463301-2463316(-)+;Alias=MEME-1;ID=DARACWW-MEME-1-1-1:2463301-2463316(-);pvalue=0.00402;qvalue=0.0901;sequence=AGGACTA;
1	fimo	nucleotide_motif	2573284	2573290	27.7	+	.	Name=DARACWW_1:2573277-2573290(+)+;Alias=MEME-1;ID=DARACWW-MEME-1-1-1:2573277-2573290(+);pvalue=0.0017;qvalue=0.0732;sequence=AAAACAT;
1	fimo	nucleotide_motif	2574020	2574026	26.7	-	.	Name=DARACWW_1:2574016-2574029(-)+;Alias=MEME-1;ID=DARACWW-MEME-1-1-1:2574016-2574029(-);pvalue=0.00212;qvalue=0.0766;sequence=GAAACTA;
1	fimo	nucleotide_motif	2574136	2574142	23.7	-	.	Name=DARACWW_1:2574132-2574146(-)+;Alias=MEME-1;ID=DARACWW-MEME-1-1-1:2574132-2574146(-);pvalue=0.00431;qvalue=0.0905;sequence=TAAACAA;
1	fimo	nucleotide_motif	2637724	2637730	24.3	+	.	Name=DARACWW_1:2637718-2637731(+)+;Alias=MEME-1;ID=DARACWW-MEME-1-1-1:2637718-2637731(+);pvalue=0.00367;qvalue=0.0857;sequence=AAGACAC;
1	fimo	nucleotide_motif	2637757	2637763	25.6	+	.	Name=DARACWW_1:2637751-2637764(+)+;Alias=MEME-1;ID=DARACWW-MEME-1-1-1:2637751-2637764(+);pvalue=0.00274;qvalue=0.0794;sequence=CAGACAT;
1	fimo	nucleotide_motif	2674579	2674585	22.8	+	.	Name=DARACWW_1:2674573-2674586(+)+;Alias=MEME-1;ID=DARACWW-MEME-1-1-1:2674573-2674586(+);pvalue=0.0053;qvalue=0.093;sequence=CAAACTA;
1	fimo	nucleotide_motif	2685488	2685494	30.5	+	.	Name=DARACWW_1:2685482-2685495(+)+;Alias=MEME-1;ID=DARACWW-MEME-1-1-1:2685482-2685495(+);pvalue=0.000882;qvalue=0.0619;sequence=CAGACTT;
1	fimo	nucleotide_motif	2685527	2685533	22.9	+	.	Name=DARACWW_1:2685522-2685535(+)+;Alias=MEME-1;ID=DARACWW-MEME-1-1-1:2685522-2685535(+);pvalue=0.00513;qvalue=0.0914;sequence=GGAACAT;
1	fimo	nucleotide_motif	2685707	2685713	22.1	-	.	Name=DARACWW_1:2685701-2685714(-)+;Alias=MEME-1;ID=DARACWW-MEME-1-1-1:2685701-2685714(-);pvalue=0.00612;qvalue=0.0968;sequence=CAAACTC;
1	fimo	nucleotide_motif	2691352	2691358	21.9	-	.	Name=DARACWW_1:2691347-2691360(-)+;Alias=MEME-1;ID=DARACWW-MEME-1-1-1:2691347-2691360(-);pvalue=0.00642;qvalue=0.0978;sequence=GAGATTT;
1	fimo	nucleotide_motif	2700890	2700896	28.2	+	.	Name=DARACWW_1:2700884-2700899(+)+;Alias=MEME-1;ID=DARACWW-MEME-1-1-1:2700884-2700899(+);pvalue=0.00151;qvalue=0.0732;sequence=TAAACAT;
1	fimo	nucleotide_motif	2829149	2829155	22.2	+	.	Name=DARACWW_1:2829141-2829155(+)+;Alias=MEME-1;ID=DARACWW-MEME-1-1-1:2829141-2829155(+);pvalue=0.00599;qvalue=0.0965;sequence=AAAACCT;
1	fimo	nucleotide_motif	2884205	2884211	23.3	+	.	Name=DARACWW_1:2884199-2884212(+)+;Alias=MEME-1;ID=DARACWW-MEME-1-1-1:2884199-2884212(+);pvalue=0.00471;qvalue=0.0905;sequence=GAAACAA;
1	fimo	nucleotide_motif	2895254	2895260	29.7	-	.	Name=DARACWW_1:2895250-2895263(-)+;Alias=MEME-1;ID=DARACWW-MEME-1-1-1:2895250-2895263(-);pvalue=0.00108;qvalue=0.0664;sequence=GAGACTA;
1	fimo	nucleotide_motif	2921189	2921195	22.5	-	.	Name=DARACWW_1:2921184-2921198(-)+;Alias=MEME-1;ID=DARACWW-MEME-1-1-1:2921184-2921198(-);pvalue=0.00567;qvalue=0.0952;sequence=GTGACTT;
1	fimo	nucleotide_motif	2948970	2948976	35	+	.	Name=DARACWW_1:2948964-2948977(+)+;Alias=MEME-1;ID=DARACWW-MEME-1-1-1:2948964-2948977(+);pvalue=0.000319;qvalue=0.0508;sequence=TAAACTT;
1	fimo	nucleotide_motif	2973058	2973064	41.1	-	.	Name=DARACWW_1:2973054-2973067(-)+;Alias=MEME-1;ID=DARACWW-MEME-1-1-1:2973054-2973067(-);pvalue=7.71e-05;qvalue=0.0467;sequence=TAGACTT;
1	fimo	nucleotide_motif	2973114	2973120	23.3	-	.	Name=DARACWW_1:2973110-2973123(-)+;Alias=MEME-1;ID=DARACWW-MEME-1-1-1:2973110-2973123(-);pvalue=0.00471;qvalue=0.0905;sequence=GAAACAA;
1	fimo	nucleotide_motif	2998034	2998040	26.7	+	.	Name=DARACWW_1:2998028-2998041(+)+;Alias=MEME-1;ID=DARACWW-MEME-1-1-1:2998028-2998041(+);pvalue=0.00212;qvalue=0.0766;sequence=TAAACTC;
1	fimo	nucleotide_motif	2998189	2998195	24.9	-	.	Name=DARACWW_1:2998187-2998200(-)+;Alias=MEME-1;ID=DARACWW-MEME-1-1-1:2998187-2998200(-);pvalue=0.00323;qvalue=0.0822;sequence=AAGACAA;
1	fimo	nucleotide_motif	3018017	3018023	34	+	.	Name=DARACWW_1:3018011-3018024(+)+;Alias=MEME-1;ID=DARACWW-MEME-1-1-1:3018011-3018024(+);pvalue=0.0004;qvalue=0.0508;sequence=GAAACTT;
1	fimo	nucleotide_motif	3045112	3045118	33	+	.	Name=DARACWW_1:3045105-3045118(+)+;Alias=MEME-1;ID=DARACWW-MEME-1-1-1:3045105-3045118(+);pvalue=0.0005;qvalue=0.0508;sequence=AAAACTT;
1	fimo	nucleotide_motif	3045142	3045148	23	+	.	Name=DARACWW_1:3045135-3045148(+)+;Alias=MEME-1;ID=DARACWW-MEME-1-1-1:3045135-3045148(+);pvalue=0.00506;qvalue=0.0905;sequence=AAAACTG;
1	fimo	nucleotide_motif	3045212	3045218	36.5	+	.	Name=DARACWW_1:3045205-3045219(+)+;Alias=MEME-1;ID=DARACWW-MEME-1-1-1:3045205-3045219(+);pvalue=0.000224;qvalue=0.0467;sequence=AAGACTT;
1	fimo	nucleotide_motif	3107626	3107632	21.7	+	.	Name=DARACWW_1:3107621-3107634(+)+;Alias=MEME-1;ID=DARACWW-MEME-1-1-1:3107621-3107634(+);pvalue=0.00677;qvalue=0.0998;sequence=AGAACTC;
1	fimo	nucleotide_motif	3107652	3107658	30.5	+	.	Name=DARACWW_1:3107646-3107659(+)+;Alias=MEME-1;ID=DARACWW-MEME-1-1-1:3107646-3107659(+);pvalue=0.000882;qvalue=0.0619;sequence=CAGACTT;
1	fimo	nucleotide_motif	3107659	3107665	26.5	+	.	Name=DARACWW_1:3107652-3107667(+)+;Alias=MEME-1;ID=DARACWW-MEME-1-1-1:3107652-3107667(+);pvalue=0.00222;qvalue=0.0769;sequence=AAAACTA;
1	fimo	nucleotide_motif	3112978	3112984	23	-	.	Name=DARACWW_1:3112974-3112989(-)+;Alias=MEME-1;ID=DARACWW-MEME-1-1-1:3112974-3112989(-);pvalue=0.00506;qvalue=0.0905;sequence=TTGACTT;
1	fimo	nucleotide_motif	3112987	3112993	24.3	-	.	Name=DARACWW_1:3112982-3112996(-)+;Alias=MEME-1;ID=DARACWW-MEME-1-1-1:3112982-3112996(-);pvalue=0.00367;qvalue=0.0857;sequence=TGGACTA;
1	fimo	nucleotide_motif	3122261	3122267	25.7	+	.	Name=DARACWW_1:3122255-3122268(+)+;Alias=MEME-1;ID=DARACWW-MEME-1-1-1:3122255-3122268(+);pvalue=0.00267;qvalue=0.0794;sequence=TAGACTG;
1	fimo	nucleotide_motif	3127875	3127881	27.4	-	.	Name=DARACWW_1:3127871-3127884(-)+;Alias=MEME-1;ID=DARACWW-MEME-1-1-1:3127871-3127884(-);pvalue=0.0018;qvalue=0.0746;sequence=TAAACTA;
1	fimo	nucleotide_motif	3159339	3159345	27.4	-	.	Name=DARACWW_1:3159335-3159348(-)+;Alias=MEME-1;ID=DARACWW-MEME-1-1-1:3159335-3159348(-);pvalue=0.0018;qvalue=0.0746;sequence=TAAACTA;
1	fimo	nucleotide_motif	3165167	3165173	23	+	.	Name=DARACWW_1:3165163-3165177(+)+;Alias=MEME-1;ID=DARACWW-MEME-1-1-1:3165163-3165177(+);pvalue=0.00506;qvalue=0.0905;sequence=TTGACTT;
1	fimo	nucleotide_motif	3165203	3165209	22.2	+	.	Name=DARACWW_1:3165196-3165209(+)+;Alias=MEME-1;ID=DARACWW-MEME-1-1-1:3165196-3165209(+);pvalue=0.00599;qvalue=0.0965;sequence=ATGACTT;
1	fimo	nucleotide_motif	3165418	3165424	27.7	-	.	Name=DARACWW_1:3165415-3165428(-)+;Alias=MEME-1;ID=DARACWW-MEME-1-1-1:3165415-3165428(-);pvalue=0.0017;qvalue=0.0732;sequence=AAAACAT;
1	fimo	nucleotide_motif	3165454	3165460	24.7	-	.	Name=DARACWW_1:3165450-3165463(-)+;Alias=MEME-1;ID=DARACWW-MEME-1-1-1:3165450-3165463(-);pvalue=0.00342;qvalue=0.0846;sequence=CAGACTA;
1	fimo	nucleotide_motif	3255605	3255611	27.4	+	.	Name=DARACWW_1:3255599-3255612(+)+;Alias=MEME-1;ID=DARACWW-MEME-1-1-1:3255599-3255612(+);pvalue=0.0018;qvalue=0.0746;sequence=TAAACTA;
1	fimo	nucleotide_motif	3333712	3333718	27.7	-	.	Name=DARACWW_1:3333709-3333723(-)+;Alias=MEME-1;ID=DARACWW-MEME-1-1-1:3333709-3333723(-);pvalue=0.0017;qvalue=0.0732;sequence=AAAACAT;
1	fimo	nucleotide_motif	3346475	3346481	23.3	-	.	Name=DARACWW_1:3346471-3346484(-)+;Alias=MEME-1;ID=DARACWW-MEME-1-1-1:3346471-3346484(-);pvalue=0.00471;qvalue=0.0905;sequence=GAAACAA;
1	fimo	nucleotide_motif	3346484	3346490	26.7	-	.	Name=DARACWW_1:3346480-3346493(-)+;Alias=MEME-1;ID=DARACWW-MEME-1-1-1:3346480-3346493(-);pvalue=0.00212;qvalue=0.0766;sequence=GAAACTA;
1	fimo	nucleotide_motif	3381645	3381651	24.7	-	.	Name=DARACWW_1:3381643-3381656(-)+;Alias=MEME-1;ID=DARACWW-MEME-1-1-1:3381643-3381656(-);pvalue=0.00342;qvalue=0.0846;sequence=CAGACTA;
1	fimo	nucleotide_motif	3395591	3395597	23.6	-	.	Name=DARACWW_1:3395585-3395598(-)+;Alias=MEME-1;ID=DARACWW-MEME-1-1-1:3395585-3395598(-);pvalue=0.00439;qvalue=0.0905;sequence=CAAACAT;
1	fimo	nucleotide_motif	3428563	3428569	22.7	-	.	Name=DARACWW_1:3428559-3428572(-)+;Alias=MEME-1;ID=DARACWW-MEME-1-1-1:3428559-3428572(-);pvalue=0.00537;qvalue=0.0935;sequence=GAAACAC;
1	fimo	nucleotide_motif	3460104	3460110	33	-	.	Name=DARACWW_1:3460100-3460113(-)+;Alias=MEME-1;ID=DARACWW-MEME-1-1-1:3460100-3460113(-);pvalue=0.0005;qvalue=0.0508;sequence=AAAACTT;
1	fimo	nucleotide_motif	3471362	3471368	26	+	.	Name=DARACWW_1:3471355-3471368(+)+;Alias=MEME-1;ID=DARACWW-MEME-1-1-1:3471355-3471368(+);pvalue=0.00252;qvalue=0.0778;sequence=AAAACTC;
1	fimo	nucleotide_motif	3471405	3471411	23	+	.	Name=DARACWW_1:3471398-3471411(+)+;Alias=MEME-1;ID=DARACWW-MEME-1-1-1:3471398-3471411(+);pvalue=0.00506;qvalue=0.0905;sequence=AAAACTG;
1	fimo	nucleotide_motif	3491372	3491378	26.5	-	.	Name=DARACWW_1:3491368-3491381(-)+;Alias=MEME-1;ID=DARACWW-MEME-1-1-1:3491368-3491381(-);pvalue=0.00222;qvalue=0.0769;sequence=AAAACTA;
1	fimo	nucleotide_motif	3513107	3513113	24.2	-	.	Name=DARACWW_1:3513103-3513116(-)+;Alias=MEME-1;ID=DARACWW-MEME-1-1-1:3513103-3513116(-);pvalue=0.00379;qvalue=0.0872;sequence=AAGACCT;
1	fimo	nucleotide_motif	3538202	3538208	33	+	.	Name=DARACWW_1:3538195-3538208(+)+;Alias=MEME-1;ID=DARACWW-MEME-1-1-1:3538195-3538208(+);pvalue=0.0005;qvalue=0.0508;sequence=AAAACTT;
1	fimo	nucleotide_motif	3581042	3581048	23	-	.	Name=DARACWW_1:3581041-3581054(-)+;Alias=MEME-1;ID=DARACWW-MEME-1-1-1:3581041-3581054(-);pvalue=0.00506;qvalue=0.0905;sequence=AAAACTG;
1	fimo	nucleotide_motif	3607834	3607840	36.5	-	.	Name=DARACWW_1:3607830-3607843(-)+;Alias=MEME-1;ID=DARACWW-MEME-1-1-1:3607830-3607843(-);pvalue=0.000224;qvalue=0.0467;sequence=AAGACTT;
1	fimo	nucleotide_motif	3614465	3614471	28.9	+	.	Name=DARACWW_1:3614461-3614474(+)+;Alias=MEME-1;ID=DARACWW-MEME-1-1-1:3614461-3614474(+);pvalue=0.00128;qvalue=0.0722;sequence=AGGACTT;
1	fimo	nucleotide_motif	3614682	3614688	24.8	-	.	Name=DARACWW_1:3614678-3614691(-)+;Alias=MEME-1;ID=DARACWW-MEME-1-1-1:3614678-3614691(-);pvalue=0.00328;qvalue=0.0832;sequence=GGGACAT;
1	fimo	nucleotide_motif	3663698	3663704	22.9	+	.	Name=DARACWW_1:3663693-3663706(+)+;Alias=MEME-1;ID=DARACWW-MEME-1-1-1:3663693-3663706(+);pvalue=0.00513;qvalue=0.0914;sequence=GGAACAT;
1	fimo	nucleotide_motif	3821623	3821629	26.7	-	.	Name=DARACWW_1:3821619-3821633(-)+;Alias=MEME-1;ID=DARACWW-MEME-1-1-1:3821619-3821633(-);pvalue=0.00212;qvalue=0.0766;sequence=TAAACTC;
1	fimo	nucleotide_motif	3848936	3848942	27.4	+	.	Name=DARACWW_1:3848930-3848946(+)+;Alias=MEME-1;ID=DARACWW-MEME-1-1-1:3848930-3848946(+);pvalue=0.0018;qvalue=0.0746;sequence=TAAACTA;
1	fimo	nucleotide_motif	3863868	3863874	27.7	+	.	Name=DARACWW_1:3863861-3863874(+)+;Alias=MEME-1;ID=DARACWW-MEME-1-1-1:3863861-3863874(+);pvalue=0.0017;qvalue=0.0732;sequence=AAAACAT;
1	fimo	nucleotide_motif	3940693	3940699	23.7	+	.	Name=DARACWW_1:3940687-3940704(+)+;Alias=MEME-1;ID=DARACWW-MEME-1-1-1:3940687-3940704(+);pvalue=0.00431;qvalue=0.0905;sequence=TAAACTG;
1	fimo	nucleotide_motif	3956901	3956907	25.2	+	.	Name=DARACWW_1:3956897-3956910(+)+;Alias=MEME-1;ID=DARACWW-MEME-1-1-1:3956897-3956910(+);pvalue=0.003;qvalue=0.0822;sequence=GAGACAA;
1	fimo	nucleotide_motif	3969680	3969686	26.5	+	.	Name=DARACWW_1:3969679-3969692(+)+;Alias=MEME-1;ID=DARACWW-MEME-1-1-1:3969679-3969692(+);pvalue=0.00222;qvalue=0.0769;sequence=AAAACTA;
1	fimo	nucleotide_motif	3969685	3969691	23.7	+	.	Name=DARACWW_1:3969679-3969692(+)+;Alias=MEME-1;ID=DARACWW-MEME-1-2-1:3969679-3969692(+);pvalue=0.00431;qvalue=0.0905;sequence=TAAACTG;
1	fimo	nucleotide_motif	3991090	3991096	28	-	.	Name=DARACWW_1:3991086-3991099(-)+;Alias=MEME-1;ID=DARACWW-MEME-1-1-1:3991086-3991099(-);pvalue=0.00159;qvalue=0.0732;sequence=GAAACAT;
1	fimo	nucleotide_motif	3997587	3997593	36.5	+	.	Name=DARACWW_1:3997580-3997594(+)+;Alias=MEME-1;ID=DARACWW-MEME-1-1-1:3997580-3997594(+);pvalue=0.000224;qvalue=0.0467;sequence=AAGACTT;
1	fimo	nucleotide_motif	3997683	3997689	26	+	.	Name=DARACWW_1:3997676-3997690(+)+;Alias=MEME-1;ID=DARACWW-MEME-1-1-1:3997676-3997690(+);pvalue=0.00252;qvalue=0.0778;sequence=AAAACTC;
1	fimo	nucleotide_motif	4003266	4003272	22.2	+	.	Name=DARACWW_1:4003262-4003275(+)+;Alias=MEME-1;ID=DARACWW-MEME-1-1-1:4003262-4003275(+);pvalue=0.00599;qvalue=0.0965;sequence=ATGACTT;
1	fimo	nucleotide_motif	4003292	4003298	22.2	+	.	Name=DARACWW_1:4003288-4003302(+)+;Alias=MEME-1;ID=DARACWW-MEME-1-1-1:4003288-4003302(+);pvalue=0.00599;qvalue=0.0965;sequence=ATGACTT;
1	fimo	nucleotide_motif	4016898	4016904	33	-	.	Name=DARACWW_1:4016894-4016908(-)+;Alias=MEME-1;ID=DARACWW-MEME-1-1-1:4016894-4016908(-);pvalue=0.0005;qvalue=0.0508;sequence=AAAACTT;
1	fimo	nucleotide_motif	4016905	4016911	23	-	.	Name=DARACWW_1:4016900-4016913(-)+;Alias=MEME-1;ID=DARACWW-MEME-1-1-1:4016900-4016913(-);pvalue=0.00506;qvalue=0.0905;sequence=AAAACTG;
1	fimo	nucleotide_motif	4017031	4017037	28.9	-	.	Name=DARACWW_1:4017025-4017038(-)+;Alias=MEME-1;ID=DARACWW-MEME-1-1-1:4017025-4017038(-);pvalue=0.00128;qvalue=0.0722;sequence=AGGACTT;
1	fimo	nucleotide_motif	4150841	4150847	38.4	+	.	Name=DARACWW_1:4150835-4150848(+)+;Alias=MEME-1;ID=DARACWW-MEME-1-1-1:4150835-4150848(+);pvalue=0.000143;qvalue=0.0467;sequence=GAGACTT;
1	fimo	nucleotide_motif	4150876	4150882	29.3	+	.	Name=DARACWW_1:4150869-4150883(+)+;Alias=MEME-1;ID=DARACWW-MEME-1-1-1:4150869-4150883(+);pvalue=0.00116;qvalue=0.0681;sequence=AAGACTA;
1	fimo	nucleotide_motif	4206300	4206306	23	+	.	Name=DARACWW_1:4206296-4206309(+)+;Alias=MEME-1;ID=DARACWW-MEME-1-1-1:4206296-4206309(+);pvalue=0.00506;qvalue=0.0905;sequence=TTGACTT;
1	fimo	nucleotide_motif	4267201	4267207	33	-	.	Name=DARACWW_1:4267197-4267210(-)+;Alias=MEME-1;ID=DARACWW-MEME-1-1-1:4267197-4267210(-);pvalue=0.0005;qvalue=0.0508;sequence=AAAACTT;
1	fimo	nucleotide_motif	4307861	4307867	31.3	+	.	Name=DARACWW_1:4307857-4307870(+)+;Alias=MEME-1;ID=DARACWW-MEME-1-1-1:4307857-4307870(+);pvalue=0.000737;qvalue=0.0566;sequence=AAGACAT;
1	fimo	nucleotide_motif	4307877	4307883	24.9	+	.	Name=DARACWW_1:4307871-4307884(+)+;Alias=MEME-1;ID=DARACWW-MEME-1-1-1:4307871-4307884(+);pvalue=0.00323;qvalue=0.0822;sequence=TAGACCT;
1	fimo	nucleotide_motif	4350682	4350688	26.7	+	.	Name=DARACWW_1:4350676-4350689(+)+;Alias=MEME-1;ID=DARACWW-MEME-1-1-1:4350676-4350689(+);pvalue=0.00212;qvalue=0.0766;sequence=GAAACTA;
1	fimo	nucleotide_motif	4361703	4361709	36.5	-	.	Name=DARACWW_1:4361699-4361712(-)+;Alias=MEME-1;ID=DARACWW-MEME-1-1-1:4361699-4361712(-);pvalue=0.000224;qvalue=0.0467;sequence=AAGACTT;
1	fimo	nucleotide_motif	4368681	4368687	25.7	+	.	Name=DARACWW_1:4368675-4368688(+)+;Alias=MEME-1;ID=DARACWW-MEME-1-1-1:4368675-4368688(+);pvalue=0.00267;qvalue=0.0794;sequence=TAGACAA;
1	fimo	nucleotide_motif	4378294	4378300	22.2	+	.	Name=DARACWW_1:4378291-4378304(+)+;Alias=MEME-1;ID=DARACWW-MEME-1-1-1:4378291-4378304(+);pvalue=0.00599;qvalue=0.0965;sequence=TAGATTT;
1	fimo	nucleotide_motif	4378422	4378428	21.8	+	.	Name=DARACWW_1:4378418-4378431(+)+;Alias=MEME-1;ID=DARACWW-MEME-1-1-1:4378418-4378431(+);pvalue=0.00665;qvalue=0.0986;sequence=AAGACAG;
1	fimo	nucleotide_motif	4379841	4379847	21.9	-	.	Name=DARACWW_1:4379836-4379850(-)+;Alias=MEME-1;ID=DARACWW-MEME-1-1-1:4379836-4379850(-);pvalue=0.00652;qvalue=0.0978;sequence=AAGATTT;
1	fimo	nucleotide_motif	4392502	4392508	23.6	-	.	Name=DARACWW_1:4392496-4392513(-)+;Alias=MEME-1;ID=DARACWW-MEME-1-1-1:4392496-4392513(-);pvalue=0.00439;qvalue=0.0905;sequence=CAAACAT;
1	fimo	nucleotide_motif	4395009	4395015	24.9	-	.	Name=DARACWW_1:4395005-4395018(-)+;Alias=MEME-1;ID=DARACWW-MEME-1-1-1:4395005-4395018(-);pvalue=0.00323;qvalue=0.0822;sequence=AAGACTG;
1	fimo	nucleotide_motif	4396405	4396411	25.7	-	.	Name=DARACWW_1:4396401-4396414(-)+;Alias=MEME-1;ID=DARACWW-MEME-1-1-1:4396401-4396414(-);pvalue=0.00267;qvalue=0.0794;sequence=TAGACAA;
1	fimo	nucleotide_motif	4396438	4396444	22.8	-	.	Name=DARACWW_1:4396434-4396447(-)+;Alias=MEME-1;ID=DARACWW-MEME-1-1-1:4396434-4396447(-);pvalue=0.0053;qvalue=0.093;sequence=AGAACAT;
1	fimo	nucleotide_motif	4501508	4501514	27.4	+	.	Name=DARACWW_1:4501502-4501515(+)+;Alias=MEME-1;ID=DARACWW-MEME-1-1-1:4501502-4501515(+);pvalue=0.0018;qvalue=0.0746;sequence=TAAACTA;
1	fimo	nucleotide_motif	4608391	4608397	26	-	.	Name=DARACWW_1:4608386-4608400(-)+;Alias=MEME-1;ID=DARACWW-MEME-1-1-1:4608386-4608400(-);pvalue=0.00252;qvalue=0.0778;sequence=AAAACTC;
1	fimo	nucleotide_motif	4712374	4712380	26.7	+	.	Name=DARACWW_1:4712368-4712381(+)+;Alias=MEME-1;ID=DARACWW-MEME-1-1-1:4712368-4712381(+);pvalue=0.00212;qvalue=0.0766;sequence=TAAACTC;
1	fimo	nucleotide_motif	4737579	4737585	38.4	+	.	Name=DARACWW_1:4737575-4737588(+)+;Alias=MEME-1;ID=DARACWW-MEME-1-1-1:4737575-4737588(+);pvalue=0.000143;qvalue=0.0467;sequence=GAGACTT;
1	fimo	nucleotide_motif	4737747	4737753	23.6	+	.	Name=DARACWW_1:4737741-4737754(+)+;Alias=MEME-1;ID=DARACWW-MEME-1-1-1:4737741-4737754(+);pvalue=0.00439;qvalue=0.0905;sequence=CAAACAT;
1	fimo	nucleotide_motif	4737800	4737806	23	+	.	Name=DARACWW_1:4737793-4737806(+)+;Alias=MEME-1;ID=DARACWW-MEME-1-1-1:4737793-4737806(+);pvalue=0.00506;qvalue=0.0905;sequence=AAAACAA;
1	fimo	nucleotide_motif	4747370	4747376	36.5	-	.	Name=DARACWW_1:4747368-4747381(-)+;Alias=MEME-1;ID=DARACWW-MEME-1-1-1:4747368-4747381(-);pvalue=0.000224;qvalue=0.0467;sequence=AAGACTT;
1	fimo	nucleotide_motif	4794522	4794528	28.7	+	.	Name=DARACWW_1:4794518-4794531(+)+;Alias=MEME-1;ID=DARACWW-MEME-1-1-1:4794518-4794531(+);pvalue=0.00134;qvalue=0.073;sequence=GAGACTC;
1	fimo	nucleotide_motif	4796528	4796534	30.9	+	.	Name=DARACWW_1:4796522-4796535(+)+;Alias=MEME-1;ID=DARACWW-MEME-1-1-1:4796522-4796535(+);pvalue=0.000818;qvalue=0.0606;sequence=TAGACTA;
1	fimo	nucleotide_motif	4805401	4805407	41.1	-	.	Name=DARACWW_1:4805399-4805412(-)+;Alias=MEME-1;ID=DARACWW-MEME-1-1-1:4805399-4805412(-);pvalue=7.71e-05;qvalue=0.0467;sequence=TAGACTT;
1	fimo	nucleotide_motif	4840682	4840688	24	+	.	Name=DARACWW_1:4840675-4840688(+)+;Alias=MEME-1;ID=DARACWW-MEME-1-1-1:4840675-4840688(+);pvalue=0.00395;qvalue=0.0888;sequence=TGGACTC;
1	fimo	nucleotide_motif	4840711	4840717	36.5	+	.	Name=DARACWW_1:4840707-4840720(+)+;Alias=MEME-1;ID=DARACWW-MEME-1-1-1:4840707-4840720(+);pvalue=0.000224;qvalue=0.0467;sequence=AAGACTT;
1	fimo	nucleotide_motif	4918095	4918101	24.3	-	.	Name=DARACWW_1:4918091-4918104(-)+;Alias=MEME-1;ID=DARACWW-MEME-1-1-1:4918091-4918104(-);pvalue=0.00367;qvalue=0.0857;sequence=AAGACAC;
1	fimo	nucleotide_motif	4927142	4927148	23	-	.	Name=DARACWW_1:4927135-4927148(-)+;Alias=MEME-1;ID=DARACWW-MEME-1-1-1:4927135-4927148(-);pvalue=0.00506;qvalue=0.0905;sequence=AAAACAA;
1	fimo	nucleotide_motif	4927191	4927197	26.5	-	.	Name=DARACWW_1:4927187-4927200(-)+;Alias=MEME-1;ID=DARACWW-MEME-1-1-1:4927187-4927200(-);pvalue=0.00222;qvalue=0.0769;sequence=AAAACTA;
1	fimo	nucleotide_motif	4987273	4987279	26.7	+	.	Name=DARACWW_1:4987266-4987280(+)+;Alias=MEME-1;ID=DARACWW-MEME-1-1-1:4987266-4987280(+);pvalue=0.00212;qvalue=0.0766;sequence=TAAACTC;
1	fimo	nucleotide_motif	5008418	5008424	26.7	-	.	Name=DARACWW_1:5008414-5008427(-)+;Alias=MEME-1;ID=DARACWW-MEME-1-1-1:5008414-5008427(-);pvalue=0.00212;qvalue=0.0766;sequence=GAAACTA;
1	fimo	nucleotide_motif	5040318	5040324	24.9	+	.	Name=DARACWW_1:5040311-5040325(+)+;Alias=MEME-1;ID=DARACWW-MEME-1-1-1:5040311-5040325(+);pvalue=0.00323;qvalue=0.0822;sequence=AAGACAA;
1	fimo	nucleotide_motif	5040457	5040463	29.3	+	.	Name=DARACWW_1:5040453-5040466(+)+;Alias=MEME-1;ID=DARACWW-MEME-1-1-1:5040453-5040466(+);pvalue=0.00116;qvalue=0.0681;sequence=AAGACTA;
1	fimo	nucleotide_motif	5102616	5102622	22.2	-	.	Name=DARACWW_1:5102611-5102625(-)+;Alias=MEME-1;ID=DARACWW-MEME-1-1-1:5102611-5102625(-);pvalue=0.00599;qvalue=0.0965;sequence=TAGATTT;
1	fimo	nucleotide_motif	5165826	5165832	30.2	-	.	Name=DARACWW_1:5165821-5165835(-)+;Alias=MEME-1;ID=DARACWW-MEME-1-1-1:5165821-5165835(-);pvalue=0.000945;qvalue=0.0635;sequence=TGGACTT;
1	fimo	nucleotide_motif	5180016	5180022	23	+	.	Name=DARACWW_1:5180009-5180022(+)+;Alias=MEME-1;ID=DARACWW-MEME-1-1-1:5180009-5180022(+);pvalue=0.00506;qvalue=0.0905;sequence=AAAACTG;
1	fimo	nucleotide_motif	5203978	5203984	27.1	+	.	Name=DARACWW_1:5203971-5203984(+)+;Alias=MEME-1;ID=DARACWW-MEME-1-1-1:5203971-5203984(+);pvalue=0.00195;qvalue=0.0766;sequence=TGAACTT;
1	fimo	nucleotide_motif	5210407	5210413	33	-	.	Name=DARACWW_1:5210404-5210417(-)+;Alias=MEME-1;ID=DARACWW-MEME-1-1-1:5210404-5210417(-);pvalue=0.0005;qvalue=0.0508;sequence=AAAACTT;
1	fimo	nucleotide_motif	5256594	5256600	29.7	+	.	Name=DARACWW_1:5256588-5256601(+)+;Alias=MEME-1;ID=DARACWW-MEME-1-1-1:5256588-5256601(+);pvalue=0.00108;qvalue=0.0664;sequence=GAGACTA;
1	fimo	nucleotide_motif	5256608	5256614	35	+	.	Name=DARACWW_1:5256602-5256615(+)+;Alias=MEME-1;ID=DARACWW-MEME-1-1-1:5256602-5256615(+);pvalue=0.000319;qvalue=0.0508;sequence=TAAACTT;
1	fimo	nucleotide_motif	5275792	5275798	21.9	-	.	Name=DARACWW_1:5275788-5275802(-)+;Alias=MEME-1;ID=DARACWW-MEME-1-1-1:5275788-5275802(-);pvalue=0.00642;qvalue=0.0978;sequence=AGAACTA;
1	fimo	nucleotide_motif	5295672	5295678	26	+	.	Name=DARACWW_1:5295665-5295678(+)+;Alias=MEME-1;ID=DARACWW-MEME-1-1-1:5295665-5295678(+);pvalue=0.00252;qvalue=0.0778;sequence=AAAACTC;
1	fimo	nucleotide_motif	5295715	5295721	34	+	.	Name=DARACWW_1:5295709-5295722(+)+;Alias=MEME-1;ID=DARACWW-MEME-1-1-1:5295709-5295722(+);pvalue=0.0004;qvalue=0.0508;sequence=GAAACTT;
1	fimo	nucleotide_motif	5296265	5296271	24.1	-	.	Name=DARACWW_1:5296263-5296276(-)+;Alias=MEME-1;ID=DARACWW-MEME-1-1-1:5296263-5296276(-);pvalue=0.00384;qvalue=0.0872;sequence=CAGACTC;
1	fimo	nucleotide_motif	5296298	5296304	33	-	.	Name=DARACWW_1:5296295-5296308(-)+;Alias=MEME-1;ID=DARACWW-MEME-1-1-1:5296295-5296308(-);pvalue=0.0005;qvalue=0.0508;sequence=AAAACTT;
1	fimo	nucleotide_motif	5301660	5301666	38.4	-	.	Name=DARACWW_1:5301656-5301669(-)+;Alias=MEME-1;ID=DARACWW-MEME-1-1-1:5301656-5301669(-);pvalue=0.000143;qvalue=0.0467;sequence=GAGACTT;
1	fimo	nucleotide_motif	5306100	5306106	23.7	-	.	Name=DARACWW_1:5306096-5306109(-)+;Alias=MEME-1;ID=DARACWW-MEME-1-1-1:5306096-5306109(-);pvalue=0.00431;qvalue=0.0905;sequence=TAAACAA;
1	fimo	nucleotide_motif	5328771	5328777	29.3	+	.	Name=DARACWW_1:5328763-5328780(+)+;Alias=MEME-1;ID=DARACWW-MEME-1-1-1:5328763-5328780(+);pvalue=0.00116;qvalue=0.0681;sequence=AAGACTA;
1	fimo	nucleotide_motif	5328839	5328845	22.8	+	.	Name=DARACWW_1:5328833-5328847(+)+;Alias=MEME-1;ID=DARACWW-MEME-1-1-1:5328833-5328847(+);pvalue=0.0053;qvalue=0.093;sequence=CAAACTA;
1	fimo	nucleotide_motif	5402250	5402256	35	+	.	Name=DARACWW_1:5402245-5402258(+)+;Alias=MEME-1;ID=DARACWW-MEME-1-1-1:5402245-5402258(+);pvalue=0.000319;qvalue=0.0508;sequence=TAAACTT;
1	fimo	nucleotide_motif	5402299	5402305	22.2	+	.	Name=DARACWW_1:5402291-5402308(+)+;Alias=MEME-1;ID=DARACWW-MEME-1-1-1:5402291-5402308(+);pvalue=0.00599;qvalue=0.0965;sequence=AAAACCT;
1	fimo	nucleotide_motif	5402425	5402431	38.4	+	.	Name=DARACWW_1:5402419-5402432(+)+;Alias=MEME-1;ID=DARACWW-MEME-1-1-1:5402419-5402432(+);pvalue=0.000143;qvalue=0.0467;sequence=GAGACTT;
1	fimo	nucleotide_motif	5402485	5402491	31.9	+	.	Name=DARACWW_1:5402479-5402492(+)+;Alias=MEME-1;ID=DARACWW-MEME-1-1-1:5402479-5402492(+);pvalue=0.000651;qvalue=0.0555;sequence=GAGACAT;
1	fimo	nucleotide_motif	5407478	5407484	22.2	-	.	Name=DARACWW_1:5407473-5407486(-)+;Alias=MEME-1;ID=DARACWW-MEME-1-1-1:5407473-5407486(-);pvalue=0.00599;qvalue=0.0965;sequence=TAGATTT;
1	fimo	nucleotide_motif	5414604	5414610	24.7	+	.	Name=DARACWW_1:5414598-5414611(+)+;Alias=MEME-1;ID=DARACWW-MEME-1-1-1:5414598-5414611(+);pvalue=0.00342;qvalue=0.0846;sequence=CAGACTA;
1	fimo	nucleotide_motif	5414610	5414616	24.3	+	.	Name=DARACWW_1:5414603-5414617(+)+;Alias=MEME-1;ID=DARACWW-MEME-1-2-1:5414603-5414617(+);pvalue=0.00367;qvalue=0.0857;sequence=AAGACAC;
1	fimo	nucleotide_motif	5456849	5456855	23.6	+	.	Name=DARACWW_1:5456843-5456856(+)+;Alias=MEME-1;ID=DARACWW-MEME-1-1-1:5456843-5456856(+);pvalue=0.00439;qvalue=0.0905;sequence=CAAACAT;
1	fimo	nucleotide_motif	5456862	5456868	24.3	+	.	Name=DARACWW_1:5456858-5456871(+)+;Alias=MEME-1;ID=DARACWW-MEME-1-1-1:5456858-5456871(+);pvalue=0.00367;qvalue=0.0857;sequence=AAGACAC;
1	fimo	nucleotide_motif	5458602	5458608	27.7	-	.	Name=DARACWW_1:5458599-5458612(-)+;Alias=MEME-1;ID=DARACWW-MEME-1-1-1:5458599-5458612(-);pvalue=0.0017;qvalue=0.0732;sequence=AAAACAT;
1	fimo	nucleotide_motif	5472760	5472766	26.7	+	.	Name=DARACWW_1:5472755-5472768(+)+;Alias=MEME-1;ID=DARACWW-MEME-1-1-1:5472755-5472768(+);pvalue=0.00212;qvalue=0.0766;sequence=TAAACTC;
1	fimo	nucleotide_motif	5472846	5472852	21.9	+	.	Name=DARACWW_1:5472843-5472856(+)+;Alias=MEME-1;ID=DARACWW-MEME-1-1-1:5472843-5472856(+);pvalue=0.00642;qvalue=0.0978;sequence=GAGATTT;
1	fimo	nucleotide_motif	5472857	5472863	22.9	+	.	Name=DARACWW_1:5472851-5472865(+)+;Alias=MEME-1;ID=DARACWW-MEME-1-1-1:5472851-5472865(+);pvalue=0.00513;qvalue=0.0914;sequence=GGAACAT;
1	fimo	nucleotide_motif	5472884	5472890	41.1	+	.	Name=DARACWW_1:5472878-5472891(+)+;Alias=MEME-1;ID=DARACWW-MEME-1-1-1:5472878-5472891(+);pvalue=7.71e-05;qvalue=0.0467;sequence=TAGACTT;
1	fimo	nucleotide_motif	5482123	5482129	23.7	+	.	Name=DARACWW_1:5482117-5482130(+)+;Alias=MEME-1;ID=DARACWW-MEME-1-1-1:5482117-5482130(+);pvalue=0.00431;qvalue=0.0905;sequence=TAAACAA;
1	fimo	nucleotide_motif	5491217	5491223	23.3	+	.	Name=DARACWW_1:5491211-5491224(+)+;Alias=MEME-1;ID=DARACWW-MEME-1-1-1:5491211-5491224(+);pvalue=0.00471;qvalue=0.0905;sequence=GAAACAA;
1	fimo	nucleotide_motif	5515830	5515836	26.7	+	.	Name=DARACWW_1:5515824-5515837(+)+;Alias=MEME-1;ID=DARACWW-MEME-1-1-1:5515824-5515837(+);pvalue=0.00212;qvalue=0.0766;sequence=GAAACTA;
1	fimo	nucleotide_motif	5515925	5515931	30.5	+	.	Name=DARACWW_1:5515919-5515932(+)+;Alias=MEME-1;ID=DARACWW-MEME-1-1-1:5515919-5515932(+);pvalue=0.000882;qvalue=0.0619;sequence=CAGACTT;
1	fimo	nucleotide_motif	5538870	5538876	25.7	-	.	Name=DARACWW_1:5538868-5538881(-)+;Alias=MEME-1;ID=DARACWW-MEME-1-1-1:5538868-5538881(-);pvalue=0.00267;qvalue=0.0794;sequence=TAGACTG;
1	fimo	nucleotide_motif	5542753	5542759	22.8	+	.	Name=DARACWW_1:5542748-5542761(+)+;Alias=MEME-1;ID=DARACWW-MEME-1-1-1:5542748-5542761(+);pvalue=0.0053;qvalue=0.093;sequence=AGAACAT;
1	fimo	nucleotide_motif	5581952	5581958	25.2	+	.	Name=DARACWW_1:5581948-5581961(+)+;Alias=MEME-1;ID=DARACWW-MEME-1-1-1:5581948-5581961(+);pvalue=0.003;qvalue=0.0822;sequence=TAGACAC;
1	fimo	nucleotide_motif	5625518	5625524	33	+	.	Name=DARACWW_1:5625511-5625524(+)+;Alias=MEME-1;ID=DARACWW-MEME-1-1-1:5625511-5625524(+);pvalue=0.0005;qvalue=0.0508;sequence=AAAACTT;
1	fimo	nucleotide_motif	5670585	5670591	21.9	+	.	Name=DARACWW_1:5670582-5670595(+)+;Alias=MEME-1;ID=DARACWW-MEME-1-1-1:5670582-5670595(+);pvalue=0.00652;qvalue=0.0978;sequence=AAGATTT;
1	fimo	nucleotide_motif	5770787	5770793	22.5	-	.	Name=DARACWW_1:5770783-5770796(-)+;Alias=MEME-1;ID=DARACWW-MEME-1-1-1:5770783-5770796(-);pvalue=0.00567;qvalue=0.0952;sequence=AAAACAC;
1	fimo	nucleotide_motif	5776397	5776403	28.5	-	.	Name=DARACWW_1:5776395-5776408(-)+;Alias=MEME-1;ID=DARACWW-MEME-1-1-1:5776395-5776408(-);pvalue=0.00141;qvalue=0.0732;sequence=AAGACTC;
1	fimo	nucleotide_motif	5776489	5776495	26.1	-	.	Name=DARACWW_1:5776483-5776496(-)+;Alias=MEME-1;ID=DARACWW-MEME-1-1-1:5776483-5776496(-);pvalue=0.00244;qvalue=0.0778;sequence=GAAACTC;
1	fimo	nucleotide_motif	5831267	5831273	33	+	.	Name=DARACWW_1:5831260-5831273(+)+;Alias=MEME-1;ID=DARACWW-MEME-1-1-1:5831260-5831273(+);pvalue=0.0005;qvalue=0.0508;sequence=AAAACTT;
1	fimo	nucleotide_motif	5840333	5840339	35	-	.	Name=DARACWW_1:5840330-5840343(-)+;Alias=MEME-1;ID=DARACWW-MEME-1-1-1:5840330-5840343(-);pvalue=0.000319;qvalue=0.0508;sequence=TAAACTT;
1	fimo	nucleotide_motif	5845800	5845806	29.7	-	.	Name=DARACWW_1:5845796-5845809(-)+;Alias=MEME-1;ID=DARACWW-MEME-1-1-1:5845796-5845809(-);pvalue=0.00108;qvalue=0.0664;sequence=GAGACTA;
1	fimo	nucleotide_motif	5845869	5845875	29.7	-	.	Name=DARACWW_1:5845864-5845878(-)+;Alias=MEME-1;ID=DARACWW-MEME-1-1-1:5845864-5845878(-);pvalue=0.00108;qvalue=0.0664;sequence=GAGACTA;
1	fimo	nucleotide_motif	5880212	5880218	29.7	-	.	Name=DARACWW_1:5880210-5880223(-)+;Alias=MEME-1;ID=DARACWW-MEME-1-1-1:5880210-5880223(-);pvalue=0.00108;qvalue=0.0664;sequence=TAGACTC;
1	fimo	nucleotide_motif	5880256	5880262	23.7	-	.	Name=DARACWW_1:5880252-5880265(-)+;Alias=MEME-1;ID=DARACWW-MEME-1-1-1:5880252-5880265(-);pvalue=0.00431;qvalue=0.0905;sequence=TAAACAA;
1	fimo	nucleotide_motif	5916944	5916950	22	-	.	Name=DARACWW_1:5916940-5916953(-)+;Alias=MEME-1;ID=DARACWW-MEME-1-1-1:5916940-5916953(-);pvalue=0.00626;qvalue=0.0978;sequence=GGAACTA;
1	fimo	nucleotide_motif	5984124	5984130	29.1	-	.	Name=DARACWW_1:5984120-5984133(-)+;Alias=MEME-1;ID=DARACWW-MEME-1-1-1:5984120-5984133(-);pvalue=0.00122;qvalue=0.0702;sequence=GGGACTT;
1	fimo	nucleotide_motif	6093510	6093516	23.3	-	.	Name=DARACWW_1:6093506-6093519(-)+;Alias=MEME-1;ID=DARACWW-MEME-1-1-1:6093506-6093519(-);pvalue=0.00471;qvalue=0.0905;sequence=GAAACAA;
1	fimo	nucleotide_motif	6125190	6125196	28.7	+	.	Name=DARACWW_1:6125186-6125199(+)+;Alias=MEME-1;ID=DARACWW-MEME-1-1-1:6125186-6125199(+);pvalue=0.00134;qvalue=0.073;sequence=GAGACTC;
1	fimo	nucleotide_motif	6152444	6152450	22.2	-	.	Name=DARACWW_1:6152438-6152451(-)+;Alias=MEME-1;ID=DARACWW-MEME-1-1-1:6152438-6152451(-);pvalue=0.00599;qvalue=0.0965;sequence=ATGACTT;
1	fimo	nucleotide_motif	6154328	6154334	27.3	-	.	Name=DARACWW_1:6154321-6154335(-)+;Alias=MEME-1;ID=DARACWW-MEME-1-1-1:6154321-6154335(-);pvalue=0.00188;qvalue=0.0756;sequence=CAAACTT;
1	fimo	nucleotide_motif	6211957	6211963	22	-	.	Name=DARACWW_1:6211953-6211966(-)+;Alias=MEME-1;ID=DARACWW-MEME-1-1-1:6211953-6211966(-);pvalue=0.00626;qvalue=0.0978;sequence=GGAACTA;
1	fimo	nucleotide_motif	6244479	6244485	27.7	-	.	Name=DARACWW_1:6244476-6244489(-)+;Alias=MEME-1;ID=DARACWW-MEME-1-1-1:6244476-6244489(-);pvalue=0.0017;qvalue=0.0732;sequence=AAAACAT;
1	fimo	nucleotide_motif	6253970	6253976	23	+	.	Name=DARACWW_1:6253963-6253976(+)+;Alias=MEME-1;ID=DARACWW-MEME-1-1-1:6253963-6253976(+);pvalue=0.00506;qvalue=0.0905;sequence=AAAACAA;
1	fimo	nucleotide_motif	6283561	6283567	23	-	.	Name=DARACWW_1:6283559-6283572(-)+;Alias=MEME-1;ID=DARACWW-MEME-1-1-1:6283559-6283572(-);pvalue=0.00506;qvalue=0.0905;sequence=AAAACAA;
1	fimo	nucleotide_motif	6351812	6351818	26.7	+	.	Name=DARACWW_1:6351806-6351819(+)+;Alias=MEME-1;ID=DARACWW-MEME-1-1-1:6351806-6351819(+);pvalue=0.00212;qvalue=0.0766;sequence=GAAACTA;
1	fimo	nucleotide_motif	6356045	6356051	23.7	+	.	Name=DARACWW_1:6356039-6356052(+)+;Alias=MEME-1;ID=DARACWW-MEME-1-1-1:6356039-6356052(+);pvalue=0.00431;qvalue=0.0905;sequence=TAAACAA;
1	fimo	nucleotide_motif	6356215	6356221	22.5	-	.	Name=DARACWW_1:6356211-6356224(-)+;Alias=MEME-1;ID=DARACWW-MEME-1-1-1:6356211-6356224(-);pvalue=0.00567;qvalue=0.0952;sequence=GAAACCT;
1	fimo	nucleotide_motif	6377365	6377371	29.3	-	.	Name=DARACWW_1:6377360-6377374(-)+;Alias=MEME-1;ID=DARACWW-MEME-1-1-1:6377360-6377374(-);pvalue=0.00116;qvalue=0.0681;sequence=AAGACTA;
1	fimo	nucleotide_motif	6377444	6377450	22.2	-	.	Name=DARACWW_1:6377439-6377452(-)+;Alias=MEME-1;ID=DARACWW-MEME-1-1-1:6377439-6377452(-);pvalue=0.00599;qvalue=0.0965;sequence=TAGATTT;
1	fimo	nucleotide_motif	6402702	6402708	24.7	+	.	Name=DARACWW_1:6402696-6402709(+)+;Alias=MEME-1;ID=DARACWW-MEME-1-1-1:6402696-6402709(+);pvalue=0.00342;qvalue=0.0846;sequence=CAGACTA;
1	fimo	nucleotide_motif	6416534	6416540	26.7	-	.	Name=DARACWW_1:6416527-6416541(-)+;Alias=MEME-1;ID=DARACWW-MEME-1-1-1:6416527-6416541(-);pvalue=0.00212;qvalue=0.0766;sequence=TAAACTC;
1	fimo	nucleotide_motif	6418963	6418969	31.9	-	.	Name=DARACWW_1:6418957-6418970(-)+;Alias=MEME-1;ID=DARACWW-MEME-1-1-1:6418957-6418970(-);pvalue=0.000651;qvalue=0.0555;sequence=GAGACAT;
1	fimo	nucleotide_motif	6457911	6457917	27.4	-	.	Name=DARACWW_1:6457907-6457921(-)+;Alias=MEME-1;ID=DARACWW-MEME-1-1-1:6457907-6457921(-);pvalue=0.0018;qvalue=0.0746;sequence=TAAACTA;
1	fimo	nucleotide_motif	6551830	6551836	23.3	+	.	Name=DARACWW_1:6551824-6551837(+)+;Alias=MEME-1;ID=DARACWW-MEME-1-1-1:6551824-6551837(+);pvalue=0.00471;qvalue=0.0905;sequence=GAAACAA;
1	fimo	nucleotide_motif	6560971	6560977	23	-	.	Name=DARACWW_1:6560967-6560981(-)+;Alias=MEME-1;ID=DARACWW-MEME-1-1-1:6560967-6560981(-);pvalue=0.00506;qvalue=0.0905;sequence=AAAACAA;
1	fimo	nucleotide_motif	6690638	6690644	33	-	.	Name=DARACWW_1:6690635-6690650(-)+;Alias=MEME-1;ID=DARACWW-MEME-1-1-1:6690635-6690650(-);pvalue=0.0005;qvalue=0.0508;sequence=AAAACTT;
1	fimo	nucleotide_motif	6762661	6762667	23.7	+	.	Name=DARACWW_1:6762655-6762668(+)+;Alias=MEME-1;ID=DARACWW-MEME-1-1-1:6762655-6762668(+);pvalue=0.00431;qvalue=0.0905;sequence=TAAACTG;
1	fimo	nucleotide_motif	6807826	6807832	23.3	+	.	Name=DARACWW_1:6807820-6807833(+)+;Alias=MEME-1;ID=DARACWW-MEME-1-1-1:6807820-6807833(+);pvalue=0.00471;qvalue=0.0905;sequence=GAAACAA;
1	fimo	nucleotide_motif	6809811	6809817	29.7	-	.	Name=DARACWW_1:6809809-6809822(-)+;Alias=MEME-1;ID=DARACWW-MEME-1-1-1:6809809-6809822(-);pvalue=0.00108;qvalue=0.0664;sequence=TAGACTC;
1	fimo	nucleotide_motif	6816806	6816812	22.5	-	.	Name=DARACWW_1:6816803-6816816(-)+;Alias=MEME-1;ID=DARACWW-MEME-1-1-1:6816803-6816816(-);pvalue=0.00567;qvalue=0.0952;sequence=AAAACAC;
1	fimo	nucleotide_motif	6823105	6823111	32.3	-	.	Name=DARACWW_1:6823103-6823116(-)+;Alias=MEME-1;ID=DARACWW-MEME-1-1-1:6823103-6823116(-);pvalue=0.000582;qvalue=0.0548;sequence=TAGACAT;
1	fimo	nucleotide_motif	6825326	6825332	34	+	.	Name=DARACWW_1:6825324-6825337(+)+;Alias=MEME-1;ID=DARACWW-MEME-1-1-1:6825324-6825337(+);pvalue=0.0004;qvalue=0.0508;sequence=GAAACTT;
1	fimo	nucleotide_motif	6914422	6914428	23	+	.	Name=DARACWW_1:6914418-6914431(+)+;Alias=MEME-1;ID=DARACWW-MEME-1-1-1:6914418-6914431(+);pvalue=0.00506;qvalue=0.0905;sequence=AAAACAA;
1	fimo	nucleotide_motif	6914449	6914455	23	+	.	Name=DARACWW_1:6914444-6914459(+)+;Alias=MEME-1;ID=DARACWW-MEME-1-1-1:6914444-6914459(+);pvalue=0.00506;qvalue=0.0905;sequence=TTGACTT;
1	fimo	nucleotide_motif	6914690	6914696	26.1	-	.	Name=DARACWW_1:6914684-6914697(-)+;Alias=MEME-1;ID=DARACWW-MEME-1-1-1:6914684-6914697(-);pvalue=0.00244;qvalue=0.0778;sequence=GAAACTC;
1	fimo	nucleotide_motif	6937952	6937958	27.7	-	.	Name=DARACWW_1:6937948-6937962(-)+;Alias=MEME-1;ID=DARACWW-MEME-1-1-1:6937948-6937962(-);pvalue=0.0017;qvalue=0.0732;sequence=AAAACAT;
1	fimo	nucleotide_motif	6938016	6938022	23.6	-	.	Name=DARACWW_1:6938014-6938027(-)+;Alias=MEME-1;ID=DARACWW-MEME-1-1-1:6938014-6938027(-);pvalue=0.00439;qvalue=0.0905;sequence=CAAACAT;
1	fimo	nucleotide_motif	6968710	6968716	31.9	+	.	Name=DARACWW_1:6968706-6968719(+)+;Alias=MEME-1;ID=DARACWW-MEME-1-1-1:6968706-6968719(+);pvalue=0.000651;qvalue=0.0555;sequence=GAGACAT;
1	fimo	nucleotide_motif	6968803	6968809	24.7	+	.	Name=DARACWW_1:6968797-6968810(+)+;Alias=MEME-1;ID=DARACWW-MEME-1-1-1:6968797-6968810(+);pvalue=0.00342;qvalue=0.0846;sequence=CAGACTA;
1	fimo	nucleotide_motif	6968838	6968844	30.9	+	.	Name=DARACWW_1:6968834-6968847(+)+;Alias=MEME-1;ID=DARACWW-MEME-1-1-1:6968834-6968847(+);pvalue=0.000818;qvalue=0.0606;sequence=TAGACTA;
1	fimo	nucleotide_motif	6974626	6974632	21.9	+	.	Name=DARACWW_1:6974623-6974636(+)+;Alias=MEME-1;ID=DARACWW-MEME-1-1-1:6974623-6974636(+);pvalue=0.00642;qvalue=0.0978;sequence=GAGATTT;
1	fimo	nucleotide_motif	7007938	7007944	22.1	-	.	Name=DARACWW_1:7007931-7007945(-)+;Alias=MEME-1;ID=DARACWW-MEME-1-1-1:7007931-7007945(-);pvalue=0.00612;qvalue=0.0968;sequence=CAAACTC;
1	fimo	nucleotide_motif	7020357	7020363	24.9	+	.	Name=DARACWW_1:7020353-7020366(+)+;Alias=MEME-1;ID=DARACWW-MEME-1-1-1:7020353-7020366(+);pvalue=0.00323;qvalue=0.0822;sequence=AAGACAA;
1	fimo	nucleotide_motif	7020386	7020392	26	+	.	Name=DARACWW_1:7020382-7020395(+)+;Alias=MEME-1;ID=DARACWW-MEME-1-1-1:7020382-7020395(+);pvalue=0.00252;qvalue=0.0778;sequence=AAAACTC;
1	fimo	nucleotide_motif	7103591	7103597	24.9	-	.	Name=DARACWW_1:7103587-7103600(-)+;Alias=MEME-1;ID=DARACWW-MEME-1-1-1:7103587-7103600(-);pvalue=0.00323;qvalue=0.0822;sequence=TAGACCT;
1	fimo	nucleotide_motif	7146337	7146343	26	+	.	Name=DARACWW_1:7146332-7146345(+)+;Alias=MEME-1;ID=DARACWW-MEME-1-1-1:7146332-7146345(+);pvalue=0.00252;qvalue=0.0778;sequence=AAAACTC;
1	fimo	nucleotide_motif	7146416	7146422	23.7	+	.	Name=DARACWW_1:7146410-7146423(+)+;Alias=MEME-1;ID=DARACWW-MEME-1-1-1:7146410-7146423(+);pvalue=0.00431;qvalue=0.0905;sequence=TAAACAA;
1	fimo	nucleotide_motif	7149625	7149631	29.3	+	.	Name=DARACWW_1:7149619-7149632(+)+;Alias=MEME-1;ID=DARACWW-MEME-1-1-1:7149619-7149632(+);pvalue=0.00116;qvalue=0.0681;sequence=AAGACTA;
1	fimo	nucleotide_motif	7158276	7158282	23.3	-	.	Name=DARACWW_1:7158272-7158285(-)+;Alias=MEME-1;ID=DARACWW-MEME-1-1-1:7158272-7158285(-);pvalue=0.00471;qvalue=0.0905;sequence=GAAACAA;
1	fimo	nucleotide_motif	7158343	7158349	23	-	.	Name=DARACWW_1:7158339-7158352(-)+;Alias=MEME-1;ID=DARACWW-MEME-1-1-1:7158339-7158352(-);pvalue=0.00506;qvalue=0.0905;sequence=AAAACAA;
1	fimo	nucleotide_motif	7178674	7178680	38.4	+	.	Name=DARACWW_1:7178668-7178683(+)+;Alias=MEME-1;ID=DARACWW-MEME-1-1-1:7178668-7178683(+);pvalue=0.000143;qvalue=0.0467;sequence=GAGACTT;
1	fimo	nucleotide_motif	7181321	7181327	27.4	+	.	Name=DARACWW_1:7181315-7181328(+)+;Alias=MEME-1;ID=DARACWW-MEME-1-1-1:7181315-7181328(+);pvalue=0.0018;qvalue=0.0746;sequence=TAAACTA;
1	fimo	nucleotide_motif	7181397	7181403	21.9	+	.	Name=DARACWW_1:7181394-7181407(+)+;Alias=MEME-1;ID=DARACWW-MEME-1-1-1:7181394-7181407(+);pvalue=0.00642;qvalue=0.0978;sequence=GAGATTT;
1	fimo	nucleotide_motif	7214875	7214881	24.6	+	.	Name=DARACWW_1:7214871-7214884(+)+;Alias=MEME-1;ID=DARACWW-MEME-1-1-1:7214871-7214884(+);pvalue=0.00348;qvalue=0.0846;sequence=GAGACAC;
1	fimo	nucleotide_motif	7233528	7233534	24.3	+	.	Name=DARACWW_1:7233524-7233537(+)+;Alias=MEME-1;ID=DARACWW-MEME-1-1-1:7233524-7233537(+);pvalue=0.00367;qvalue=0.0857;sequence=TGGACTA;
1	fimo	nucleotide_motif	7301803	7301809	22.5	-	.	Name=DARACWW_1:7301799-7301812(-)+;Alias=MEME-1;ID=DARACWW-MEME-1-1-1:7301799-7301812(-);pvalue=0.00567;qvalue=0.0952;sequence=GTGACTT;
1	fimo	nucleotide_motif	7301822	7301828	26.5	-	.	Name=DARACWW_1:7301818-7301831(-)+;Alias=MEME-1;ID=DARACWW-MEME-1-1-1:7301818-7301831(-);pvalue=0.00222;qvalue=0.0769;sequence=AAAACTA;
1	fimo	nucleotide_motif	7301847	7301853	22.1	-	.	Name=DARACWW_1:7301841-7301854(-)+;Alias=MEME-1;ID=DARACWW-MEME-1-1-1:7301841-7301854(-);pvalue=0.00612;qvalue=0.0968;sequence=CAAACTC;
1	fimo	nucleotide_motif	7375718	7375724	23	+	.	Name=DARACWW_1:7375710-7375728(+)+;Alias=MEME-1;ID=DARACWW-MEME-1-1-1:7375710-7375728(+);pvalue=0.00506;qvalue=0.0905;sequence=TTGACTT;
1	fimo	nucleotide_motif	7477038	7477044	29.7	-	.	Name=DARACWW_1:7477034-7477047(-)+;Alias=MEME-1;ID=DARACWW-MEME-1-1-1:7477034-7477047(-);pvalue=0.00108;qvalue=0.0664;sequence=GAGACTA;
1	fimo	nucleotide_motif	7496305	7496311	24.7	+	.	Name=DARACWW_1:7496299-7496312(+)+;Alias=MEME-1;ID=DARACWW-MEME-1-1-1:7496299-7496312(+);pvalue=0.00342;qvalue=0.0846;sequence=CAGACTA;
1	fimo	nucleotide_motif	7566334	7566340	31.9	-	.	Name=DARACWW_1:7566330-7566343(-)+;Alias=MEME-1;ID=DARACWW-MEME-1-1-1:7566330-7566343(-);pvalue=0.000651;qvalue=0.0555;sequence=GAGACAT;
1	fimo	nucleotide_motif	7571307	7571313	24.3	-	.	Name=DARACWW_1:7571301-7571314(-)+;Alias=MEME-1;ID=DARACWW-MEME-1-1-1:7571301-7571314(-);pvalue=0.00367;qvalue=0.0857;sequence=TGGACTA;
1	fimo	nucleotide_motif	7618395	7618401	36.5	+	.	Name=DARACWW_1:7618389-7618402(+)+;Alias=MEME-1;ID=DARACWW-MEME-1-1-1:7618389-7618402(+);pvalue=0.000224;qvalue=0.0467;sequence=AAGACTT;
1	fimo	nucleotide_motif	7618404	7618410	29.7	+	.	Name=DARACWW_1:7618400-7618413(+)+;Alias=MEME-1;ID=DARACWW-MEME-1-1-1:7618400-7618413(+);pvalue=0.00108;qvalue=0.0664;sequence=GAGACTA;
1	fimo	nucleotide_motif	7651767	7651773	23.3	+	.	Name=DARACWW_1:7651761-7651774(+)+;Alias=MEME-1;ID=DARACWW-MEME-1-1-1:7651761-7651774(+);pvalue=0.00471;qvalue=0.0905;sequence=GAAACAA;
1	fimo	nucleotide_motif	7661276	7661282	31.9	-	.	Name=DARACWW_1:7661272-7661285(-)+;Alias=MEME-1;ID=DARACWW-MEME-1-1-1:7661272-7661285(-);pvalue=0.000651;qvalue=0.0555;sequence=GAGACAT;
1	fimo	nucleotide_motif	7814812	7814818	22.5	-	.	Name=DARACWW_1:7814808-7814821(-)+;Alias=MEME-1;ID=DARACWW-MEME-1-1-1:7814808-7814821(-);pvalue=0.00567;qvalue=0.0952;sequence=GTGACTT;
1	fimo	nucleotide_motif	7814924	7814930	31.3	-	.	Name=DARACWW_1:7814920-7814933(-)+;Alias=MEME-1;ID=DARACWW-MEME-1-1-1:7814920-7814933(-);pvalue=0.000737;qvalue=0.0566;sequence=AAGACAT;
1	fimo	nucleotide_motif	7823889	7823895	23	+	.	Name=DARACWW_1:7823883-7823896(+)+;Alias=MEME-1;ID=DARACWW-MEME-1-1-1:7823883-7823896(+);pvalue=0.00506;qvalue=0.0905;sequence=TAAACCT;
1	fimo	nucleotide_motif	7914748	7914754	28.2	+	.	Name=DARACWW_1:7914742-7914755(+)+;Alias=MEME-1;ID=DARACWW-MEME-1-1-1:7914742-7914755(+);pvalue=0.00151;qvalue=0.0732;sequence=TAAACAT;
1	fimo	nucleotide_motif	7927045	7927051	33	+	.	Name=DARACWW_1:7927038-7927051(+)+;Alias=MEME-1;ID=DARACWW-MEME-1-1-1:7927038-7927051(+);pvalue=0.0005;qvalue=0.0508;sequence=AAAACTT;
1	fimo	nucleotide_motif	7997663	7997669	26.7	+	.	Name=DARACWW_1:7997657-7997670(+)+;Alias=MEME-1;ID=DARACWW-MEME-1-1-1:7997657-7997670(+);pvalue=0.00212;qvalue=0.0766;sequence=GAAACTA;
1	fimo	nucleotide_motif	8004211	8004217	23.6	+	.	Name=DARACWW_1:8004205-8004218(+)+;Alias=MEME-1;ID=DARACWW-MEME-1-1-1:8004205-8004218(+);pvalue=0.00439;qvalue=0.0905;sequence=CAAACAT;
1	fimo	nucleotide_motif	8028207	8028213	34	-	.	Name=DARACWW_1:8028203-8028216(-)+;Alias=MEME-1;ID=DARACWW-MEME-1-1-1:8028203-8028216(-);pvalue=0.0004;qvalue=0.0508;sequence=GAAACTT;
1	fimo	nucleotide_motif	8028231	8028237	21.9	-	.	Name=DARACWW_1:8028226-8028239(-)+;Alias=MEME-1;ID=DARACWW-MEME-1-1-1:8028226-8028239(-);pvalue=0.00642;qvalue=0.0978;sequence=GAGATTT;
1	fimo	nucleotide_motif	8052756	8052762	27.7	+	.	Name=DARACWW_1:8052749-8052762(+)+;Alias=MEME-1;ID=DARACWW-MEME-1-1-1:8052749-8052762(+);pvalue=0.0017;qvalue=0.0732;sequence=AAAACAT;
1	fimo	nucleotide_motif	8067486	8067492	25.7	+	.	Name=DARACWW_1:8067480-8067493(+)+;Alias=MEME-1;ID=DARACWW-MEME-1-1-1:8067480-8067493(+);pvalue=0.00267;qvalue=0.0794;sequence=TAGACAA;
1	fimo	nucleotide_motif	8069296	8069302	26.5	+	.	Name=DARACWW_1:8069289-8069302(+)+;Alias=MEME-1;ID=DARACWW-MEME-1-1-1:8069289-8069302(+);pvalue=0.00222;qvalue=0.0769;sequence=AAAACTA;
1	fimo	nucleotide_motif	8080374	8080380	27.3	+	.	Name=DARACWW_1:8080368-8080381(+)+;Alias=MEME-1;ID=DARACWW-MEME-1-1-1:8080368-8080381(+);pvalue=0.00188;qvalue=0.0756;sequence=CAAACTT;
1	fimo	nucleotide_motif	8121977	8121983	27.7	+	.	Name=DARACWW_1:8121970-8121983(+)+;Alias=MEME-1;ID=DARACWW-MEME-1-1-1:8121970-8121983(+);pvalue=0.0017;qvalue=0.0732;sequence=AAAACAT;
1	fimo	nucleotide_motif	8124955	8124961	23	+	.	Name=DARACWW_1:8124951-8124964(+)+;Alias=MEME-1;ID=DARACWW-MEME-1-1-1:8124951-8124964(+);pvalue=0.00506;qvalue=0.0905;sequence=TAAACCT;
1	fimo	nucleotide_motif	8224324	8224330	24.9	+	.	Name=DARACWW_1:8224317-8224331(+)+;Alias=MEME-1;ID=DARACWW-MEME-1-1-1:8224317-8224331(+);pvalue=0.00323;qvalue=0.0822;sequence=AAGACTG;
1	fimo	nucleotide_motif	8257149	8257155	27.7	-	.	Name=DARACWW_1:8257146-8257159(-)+;Alias=MEME-1;ID=DARACWW-MEME-1-1-1:8257146-8257159(-);pvalue=0.0017;qvalue=0.0732;sequence=AAAACAT;
1	fimo	nucleotide_motif	8260815	8260821	33	-	.	Name=DARACWW_1:8260812-8260825(-)+;Alias=MEME-1;ID=DARACWW-MEME-1-1-1:8260812-8260825(-);pvalue=0.0005;qvalue=0.0508;sequence=AAAACTT;
1	fimo	nucleotide_motif	8263492	8263498	22	+	.	Name=DARACWW_1:8263487-8263500(+)+;Alias=MEME-1;ID=DARACWW-MEME-1-1-1:8263487-8263500(+);pvalue=0.00626;qvalue=0.0978;sequence=TGAACTC;
1	fimo	nucleotide_motif	8268546	8268552	23.3	-	.	Name=DARACWW_1:8268542-8268555(-)+;Alias=MEME-1;ID=DARACWW-MEME-1-1-1:8268542-8268555(-);pvalue=0.00471;qvalue=0.0905;sequence=GAAACTG;
1	fimo	nucleotide_motif	8268584	8268590	26.7	-	.	Name=DARACWW_1:8268580-8268594(-)+;Alias=MEME-1;ID=DARACWW-MEME-1-1-1:8268580-8268594(-);pvalue=0.00212;qvalue=0.0766;sequence=TAAACTC;
1	fimo	nucleotide_motif	8312146	8312152	28.2	-	.	Name=DARACWW_1:8312140-8312153(-)+;Alias=MEME-1;ID=DARACWW-MEME-1-1-1:8312140-8312153(-);pvalue=0.00151;qvalue=0.0732;sequence=TAAACAT;
1	fimo	nucleotide_motif	8338518	8338524	26.2	+	.	Name=DARACWW_1:8338513-8338526(+)+;Alias=MEME-1;ID=DARACWW-MEME-1-1-1:8338513-8338526(+);pvalue=0.00237;qvalue=0.0778;sequence=AGAACTT;
1	fimo	nucleotide_motif	8338556	8338562	23	+	.	Name=DARACWW_1:8338549-8338562(+)+;Alias=MEME-1;ID=DARACWW-MEME-1-1-1:8338549-8338562(+);pvalue=0.00506;qvalue=0.0905;sequence=AAAACTG;
1	fimo	nucleotide_motif	8338569	8338575	21.9	+	.	Name=DARACWW_1:8338565-8338578(+)+;Alias=MEME-1;ID=DARACWW-MEME-1-1-1:8338565-8338578(+);pvalue=0.00652;qvalue=0.0978;sequence=AAGATTT;
1	fimo	nucleotide_motif	8427926	8427932	25.7	-	.	Name=DARACWW_1:8427924-8427937(-)+;Alias=MEME-1;ID=DARACWW-MEME-1-1-1:8427924-8427937(-);pvalue=0.00267;qvalue=0.0794;sequence=TAGACAA;
1	fimo	nucleotide_motif	8435555	8435561	23.6	+	.	Name=DARACWW_1:8435549-8435563(+)+;Alias=MEME-1;ID=DARACWW-MEME-1-1-1:8435549-8435563(+);pvalue=0.00439;qvalue=0.0905;sequence=CAAACAT;
1	fimo	nucleotide_motif	8478530	8478536	35	-	.	Name=DARACWW_1:8478526-8478539(-)+;Alias=MEME-1;ID=DARACWW-MEME-1-1-1:8478526-8478539(-);pvalue=0.000319;qvalue=0.0508;sequence=TAAACTT;
1	fimo	nucleotide_motif	8508603	8508609	21.9	+	.	Name=DARACWW_1:8508600-8508613(+)+;Alias=MEME-1;ID=DARACWW-MEME-1-1-1:8508600-8508613(+);pvalue=0.00642;qvalue=0.0978;sequence=GAGATTT;
1	fimo	nucleotide_motif	8508641	8508647	24.3	+	.	Name=DARACWW_1:8508637-8508650(+)+;Alias=MEME-1;ID=DARACWW-MEME-1-1-1:8508637-8508650(+);pvalue=0.00367;qvalue=0.0857;sequence=TGGACTA;
1	fimo	nucleotide_motif	8508734	8508740	27.4	+	.	Name=DARACWW_1:8508728-8508742(+)+;Alias=MEME-1;ID=DARACWW-MEME-1-1-1:8508728-8508742(+);pvalue=0.0018;qvalue=0.0746;sequence=TAAACTA;
1	fimo	nucleotide_motif	8508766	8508772	22.5	+	.	Name=DARACWW_1:8508762-8508775(+)+;Alias=MEME-1;ID=DARACWW-MEME-1-1-1:8508762-8508775(+);pvalue=0.00567;qvalue=0.0952;sequence=GTGACTT;
1	fimo	nucleotide_motif	8563648	8563654	23	-	.	Name=DARACWW_1:8563644-8563657(-)+;Alias=MEME-1;ID=DARACWW-MEME-1-1-1:8563644-8563657(-);pvalue=0.00506;qvalue=0.0905;sequence=AAAACAA;
1	fimo	nucleotide_motif	8643315	8643321	23	+	.	Name=DARACWW_1:8643308-8643321(+)+;Alias=MEME-1;ID=DARACWW-MEME-1-1-1:8643308-8643321(+);pvalue=0.00506;qvalue=0.0905;sequence=AAAACAA;
1	fimo	nucleotide_motif	8643414	8643420	27.4	+	.	Name=DARACWW_1:8643408-8643422(+)+;Alias=MEME-1;ID=DARACWW-MEME-1-1-1:8643408-8643422(+);pvalue=0.0018;qvalue=0.0746;sequence=TAAACTA;
1	fimo	nucleotide_motif	8643439	8643445	26.7	+	.	Name=DARACWW_1:8643433-8643446(+)+;Alias=MEME-1;ID=DARACWW-MEME-1-1-1:8643433-8643446(+);pvalue=0.00212;qvalue=0.0766;sequence=GAAACTA;
1	fimo	nucleotide_motif	8672389	8672395	22.7	+	.	Name=DARACWW_1:8672383-8672396(+)+;Alias=MEME-1;ID=DARACWW-MEME-1-1-1:8672383-8672396(+);pvalue=0.00537;qvalue=0.0935;sequence=GAAACAC;
1	fimo	nucleotide_motif	8685407	8685413	23	-	.	Name=DARACWW_1:8685401-8685414(-)+;Alias=MEME-1;ID=DARACWW-MEME-1-1-1:8685401-8685414(-);pvalue=0.00506;qvalue=0.0905;sequence=TTGACTT;
1	fimo	nucleotide_motif	8771130	8771136	27.3	+	.	Name=DARACWW_1:8771129-8771142(+)+;Alias=MEME-1;ID=DARACWW-MEME-1-1-1:8771129-8771142(+);pvalue=0.00188;qvalue=0.0756;sequence=CAAACTT;
1	fimo	nucleotide_motif	8777389	8777395	23.6	+	.	Name=DARACWW_1:8777383-8777396(+)+;Alias=MEME-1;ID=DARACWW-MEME-1-1-1:8777383-8777396(+);pvalue=0.00439;qvalue=0.0905;sequence=CAAACAT;
1	fimo	nucleotide_motif	8777991	8777997	30.9	+	.	Name=DARACWW_1:8777985-8777998(+)+;Alias=MEME-1;ID=DARACWW-MEME-1-1-1:8777985-8777998(+);pvalue=0.000818;qvalue=0.0606;sequence=TAGACTA;
1	fimo	nucleotide_motif	8785509	8785515	27.3	+	.	Name=DARACWW_1:8785508-8785521(+)+;Alias=MEME-1;ID=DARACWW-MEME-1-1-1:8785508-8785521(+);pvalue=0.00188;qvalue=0.0756;sequence=CAAACTT;
1	fimo	nucleotide_motif	8799917	8799923	23.6	+	.	Name=DARACWW_1:8799911-8799925(+)+;Alias=MEME-1;ID=DARACWW-MEME-1-1-1:8799911-8799925(+);pvalue=0.00439;qvalue=0.0905;sequence=CAAACAT;
1	fimo	nucleotide_motif	8800519	8800525	30.9	+	.	Name=DARACWW_1:8800515-8800528(+)+;Alias=MEME-1;ID=DARACWW-MEME-1-1-1:8800515-8800528(+);pvalue=0.000818;qvalue=0.0606;sequence=TAGACTA;
1	fimo	nucleotide_motif	8814295	8814301	23.6	+	.	Name=DARACWW_1:8814289-8814302(+)+;Alias=MEME-1;ID=DARACWW-MEME-1-1-1:8814289-8814302(+);pvalue=0.00439;qvalue=0.0905;sequence=CAAACAT;
1	fimo	nucleotide_motif	8814897	8814903	30.9	+	.	Name=DARACWW_1:8814891-8814904(+)+;Alias=MEME-1;ID=DARACWW-MEME-1-1-1:8814891-8814904(+);pvalue=0.000818;qvalue=0.0606;sequence=TAGACTA;
1	fimo	nucleotide_motif	8828673	8828679	23.6	+	.	Name=DARACWW_1:8828666-8828683(+)+;Alias=MEME-1;ID=DARACWW-MEME-1-1-1:8828666-8828683(+);pvalue=0.00439;qvalue=0.0905;sequence=CAAACAT;
1	fimo	nucleotide_motif	8829275	8829281	30.9	+	.	Name=DARACWW_1:8829269-8829282(+)+;Alias=MEME-1;ID=DARACWW-MEME-1-1-1:8829269-8829282(+);pvalue=0.000818;qvalue=0.0606;sequence=TAGACTA;
1	fimo	nucleotide_motif	8836794	8836800	27.3	+	.	Name=DARACWW_1:8836792-8836806(+)+;Alias=MEME-1;ID=DARACWW-MEME-1-1-1:8836792-8836806(+);pvalue=0.00188;qvalue=0.0756;sequence=CAAACTT;
1	fimo	nucleotide_motif	8905943	8905949	27.4	+	.	Name=DARACWW_1:8905937-8905950(+)+;Alias=MEME-1;ID=DARACWW-MEME-1-1-1:8905937-8905950(+);pvalue=0.0018;qvalue=0.0746;sequence=TAAACTA;
1	fimo	nucleotide_motif	8964335	8964341	32.3	+	.	Name=DARACWW_1:8964331-8964344(+)+;Alias=MEME-1;ID=DARACWW-MEME-1-1-1:8964331-8964344(+);pvalue=0.000582;qvalue=0.0548;sequence=TAGACAT;
1	fimo	nucleotide_motif	8964379	8964385	23	+	.	Name=DARACWW_1:8964372-8964385(+)+;Alias=MEME-1;ID=DARACWW-MEME-1-1-1:8964372-8964385(+);pvalue=0.00506;qvalue=0.0905;sequence=AAAACAA;
1	fimo	nucleotide_motif	8964412	8964418	27.7	+	.	Name=DARACWW_1:8964405-8964418(+)+;Alias=MEME-1;ID=DARACWW-MEME-1-1-1:8964405-8964418(+);pvalue=0.0017;qvalue=0.0732;sequence=AAAACAT;
1	fimo	nucleotide_motif	8991921	8991927	27.7	-	.	Name=DARACWW_1:8991917-8991930(-)+;Alias=MEME-1;ID=DARACWW-MEME-1-1-1:8991917-8991930(-);pvalue=0.0017;qvalue=0.0732;sequence=AAAACAT;
1	fimo	nucleotide_motif	9024435	9024441	36.5	-	.	Name=DARACWW_1:9024433-9024447(-)+;Alias=MEME-1;ID=DARACWW-MEME-1-1-1:9024433-9024447(-);pvalue=0.000224;qvalue=0.0467;sequence=AAGACTT;
1	fimo	nucleotide_motif	9039772	9039778	22.5	-	.	Name=DARACWW_1:9039766-9039779(-)+;Alias=MEME-1;ID=DARACWW-MEME-1-1-1:9039766-9039779(-);pvalue=0.00567;qvalue=0.0952;sequence=AAAACAC;
1	fimo	nucleotide_motif	9172887	9172893	24.6	+	.	Name=DARACWW_1:9172885-9172898(+)+;Alias=MEME-1;ID=DARACWW-MEME-1-1-1:9172885-9172898(+);pvalue=0.00348;qvalue=0.0846;sequence=GAGACAC;
1	fimo	nucleotide_motif	9187319	9187325	41.1	+	.	Name=DARACWW_1:9187313-9187326(+)+;Alias=MEME-1;ID=DARACWW-MEME-1-1-1:9187313-9187326(+);pvalue=7.71e-05;qvalue=0.0467;sequence=TAGACTT;
1	fimo	nucleotide_motif	9187453	9187459	21.9	+	.	Name=DARACWW_1:9187450-9187463(+)+;Alias=MEME-1;ID=DARACWW-MEME-1-1-1:9187450-9187463(+);pvalue=0.00652;qvalue=0.0978;sequence=AAGATTT;
1	fimo	nucleotide_motif	9207213	9207219	24.9	+	.	Name=DARACWW_1:9207206-9207222(+)+;Alias=MEME-1;ID=DARACWW-MEME-1-1-1:9207206-9207222(+);pvalue=0.00323;qvalue=0.0822;sequence=AAGACAA;
1	fimo	nucleotide_motif	9207260	9207266	28	+	.	Name=DARACWW_1:9207254-9207267(+)+;Alias=MEME-1;ID=DARACWW-MEME-1-1-1:9207254-9207267(+);pvalue=0.00159;qvalue=0.0732;sequence=GAAACAT;
1	fimo	nucleotide_motif	9217803	9217809	27.7	+	.	Name=DARACWW_1:9217796-9217813(+)+;Alias=MEME-1;ID=DARACWW-MEME-1-1-1:9217796-9217813(+);pvalue=0.0017;qvalue=0.0732;sequence=AAAACAT;
1	fimo	nucleotide_motif	9301048	9301054	23.3	-	.	Name=DARACWW_1:9301041-9301054(-)+;Alias=MEME-1;ID=DARACWW-MEME-1-1-1:9301041-9301054(-);pvalue=0.00471;qvalue=0.0905;sequence=TAAACAC;
1	fimo	nucleotide_motif	9315559	9315565	24.7	-	.	Name=DARACWW_1:9315553-9315566(-)+;Alias=MEME-1;ID=DARACWW-MEME-1-1-1:9315553-9315566(-);pvalue=0.00342;qvalue=0.0846;sequence=AGGACAT;
1	fimo	nucleotide_motif	9315580	9315586	28.9	-	.	Name=DARACWW_1:9315575-9315589(-)+;Alias=MEME-1;ID=DARACWW-MEME-1-1-1:9315575-9315589(-);pvalue=0.00128;qvalue=0.0722;sequence=AGGACTT;
1	fimo	nucleotide_motif	9376470	9376476	26	+	.	Name=DARACWW_1:9376466-9376479(+)+;Alias=MEME-1;ID=DARACWW-MEME-1-1-1:9376466-9376479(+);pvalue=0.00252;qvalue=0.0778;sequence=AAAACTC;
1	fimo	nucleotide_motif	9426668	9426674	34	+	.	Name=DARACWW_1:9426662-9426675(+)+;Alias=MEME-1;ID=DARACWW-MEME-1-1-1:9426662-9426675(+);pvalue=0.0004;qvalue=0.0508;sequence=GAAACTT;
1	fimo	nucleotide_motif	9484373	9484379	21.9	-	.	Name=DARACWW_1:9484368-9484381(-)+;Alias=MEME-1;ID=DARACWW-MEME-1-1-1:9484368-9484381(-);pvalue=0.00652;qvalue=0.0978;sequence=AAGATTT;
1	fimo	nucleotide_motif	9484505	9484511	22.9	-	.	Name=DARACWW_1:9484501-9484514(-)+;Alias=MEME-1;ID=DARACWW-MEME-1-1-1:9484501-9484514(-);pvalue=0.00513;qvalue=0.0914;sequence=GGAACAT;
1	fimo	nucleotide_motif	9484532	9484538	23	-	.	Name=DARACWW_1:9484528-9484542(-)+;Alias=MEME-1;ID=DARACWW-MEME-1-1-1:9484528-9484542(-);pvalue=0.00506;qvalue=0.0905;sequence=AAAACTG;
1	fimo	nucleotide_motif	9484543	9484549	24	-	.	Name=DARACWW_1:9484539-9484553(-)+;Alias=MEME-1;ID=DARACWW-MEME-1-1-1:9484539-9484553(-);pvalue=0.00395;qvalue=0.0888;sequence=GGGACTA;
1	fimo	nucleotide_motif	9492318	9492324	25.2	+	.	Name=DARACWW_1:9492316-9492329(+)+;Alias=MEME-1;ID=DARACWW-MEME-1-1-1:9492316-9492329(+);pvalue=0.003;qvalue=0.0822;sequence=GAGACAA;
1	fimo	nucleotide_motif	9492506	9492512	25.5	+	.	Name=DARACWW_1:9492502-9492515(+)+;Alias=MEME-1;ID=DARACWW-MEME-1-1-1:9492502-9492515(+);pvalue=0.00281;qvalue=0.0801;sequence=TGGACAT;
1	fimo	nucleotide_motif	9497964	9497970	25.2	+	.	Name=DARACWW_1:9497960-9497973(+)+;Alias=MEME-1;ID=DARACWW-MEME-1-1-1:9497960-9497973(+);pvalue=0.003;qvalue=0.0822;sequence=GAGACTG;
1	fimo	nucleotide_motif	9516735	9516741	22.1	+	.	Name=DARACWW_1:9516730-9516744(+)+;Alias=MEME-1;ID=DARACWW-MEME-1-1-1:9516730-9516744(+);pvalue=0.00612;qvalue=0.0968;sequence=TAGACAG;
1	fimo	nucleotide_motif	9533867	9533873	31.9	+	.	Name=DARACWW_1:9533863-9533876(+)+;Alias=MEME-1;ID=DARACWW-MEME-1-1-1:9533863-9533876(+);pvalue=0.000651;qvalue=0.0555;sequence=GAGACAT;
1	fimo	nucleotide_motif	9533921	9533927	24.7	+	.	Name=DARACWW_1:9533915-9533928(+)+;Alias=MEME-1;ID=DARACWW-MEME-1-1-1:9533915-9533928(+);pvalue=0.00342;qvalue=0.0846;sequence=CAGACTA;
1	fimo	nucleotide_motif	9537503	9537509	35	+	.	Name=DARACWW_1:9537497-9537510(+)+;Alias=MEME-1;ID=DARACWW-MEME-1-1-1:9537497-9537510(+);pvalue=0.000319;qvalue=0.0508;sequence=TAAACTT;
1	fimo	nucleotide_motif	9671804	9671810	24.3	-	.	Name=DARACWW_1:9671800-9671813(-)+;Alias=MEME-1;ID=DARACWW-MEME-1-1-1:9671800-9671813(-);pvalue=0.00367;qvalue=0.0857;sequence=TGGACTA;
1	fimo	nucleotide_motif	9747973	9747979	23	+	.	Name=DARACWW_1:9747969-9747982(+)+;Alias=MEME-1;ID=DARACWW-MEME-1-1-1:9747969-9747982(+);pvalue=0.00506;qvalue=0.0905;sequence=TTGACTT;
1	fimo	nucleotide_motif	9747983	9747989	24.9	+	.	Name=DARACWW_1:9747976-9747990(+)+;Alias=MEME-1;ID=DARACWW-MEME-1-1-1:9747976-9747990(+);pvalue=0.00323;qvalue=0.0822;sequence=AAGACAA;
1	fimo	nucleotide_motif	9832925	9832931	23.3	-	.	Name=DARACWW_1:9832921-9832934(-)+;Alias=MEME-1;ID=DARACWW-MEME-1-1-1:9832921-9832934(-);pvalue=0.00471;qvalue=0.0905;sequence=TAAACAC;
1	fimo	nucleotide_motif	9835037	9835043	24.1	-	.	Name=DARACWW_1:9835035-9835048(-)+;Alias=MEME-1;ID=DARACWW-MEME-1-1-1:9835035-9835048(-);pvalue=0.00384;qvalue=0.0872;sequence=CAGACTC;
1	fimo	nucleotide_motif	9875368	9875374	21.8	+	.	Name=DARACWW_1:9875361-9875374(+)+;Alias=MEME-1;ID=DARACWW-MEME-1-1-1:9875361-9875374(+);pvalue=0.00665;qvalue=0.0986;sequence=AAGACAG;
1	fimo	nucleotide_motif	9875462	9875468	24.7	+	.	Name=DARACWW_1:9875456-9875469(+)+;Alias=MEME-1;ID=DARACWW-MEME-1-1-1:9875456-9875469(+);pvalue=0.00342;qvalue=0.0846;sequence=CAGACTA;
1	fimo	nucleotide_motif	9875745	9875751	23.3	-	.	Name=DARACWW_1:9875741-9875754(-)+;Alias=MEME-1;ID=DARACWW-MEME-1-1-1:9875741-9875754(-);pvalue=0.00471;qvalue=0.0905;sequence=GAAACTG;
1	fimo	nucleotide_motif	10017905	10017911	23.3	+	.	Name=DARACWW_1:10017899-10017912(+)+;Alias=MEME-1;ID=DARACWW-MEME-1-1-1:10017899-10017912(+);pvalue=0.00471;qvalue=0.0905;sequence=GAAACAA;
1	fimo	nucleotide_motif	10036843	10036849	33	+	.	Name=DARACWW_1:10036835-10036849(+)+;Alias=MEME-1;ID=DARACWW-MEME-1-1-1:10036835-10036849(+);pvalue=0.0005;qvalue=0.0508;sequence=AAAACTT;
1	fimo	nucleotide_motif	10044537	10044543	27.7	-	.	Name=DARACWW_1:10044534-10044547(-)+;Alias=MEME-1;ID=DARACWW-MEME-1-1-1:10044534-10044547(-);pvalue=0.0017;qvalue=0.0732;sequence=AAAACAT;
1	fimo	nucleotide_motif	10044583	10044589	23.3	-	.	Name=DARACWW_1:10044579-10044592(-)+;Alias=MEME-1;ID=DARACWW-MEME-1-1-1:10044579-10044592(-);pvalue=0.00471;qvalue=0.0905;sequence=GAAACTG;
1	fimo	nucleotide_motif	10135247	10135253	23	+	.	Name=DARACWW_1:10135246-10135259(+)+;Alias=MEME-1;ID=DARACWW-MEME-1-1-1:10135246-10135259(+);pvalue=0.00506;qvalue=0.0905;sequence=AAAACAA;
1	fimo	nucleotide_motif	10135253	10135259	23	+	.	Name=DARACWW_1:10135246-10135259(+)+;Alias=MEME-1;ID=DARACWW-MEME-1-2-1:10135246-10135259(+);pvalue=0.00506;qvalue=0.0905;sequence=AAAACAA;
1	fimo	nucleotide_motif	10151227	10151233	28	+	.	Name=DARACWW_1:10151221-10151234(+)+;Alias=MEME-1;ID=DARACWW-MEME-1-1-1:10151221-10151234(+);pvalue=0.00159;qvalue=0.0732;sequence=GAAACAT;
1	fimo	nucleotide_motif	10182567	10182573	24	+	.	Name=DARACWW_1:10182561-10182577(+)+;Alias=MEME-1;ID=DARACWW-MEME-1-1-1:10182561-10182577(+);pvalue=0.00395;qvalue=0.0888;sequence=TGGACTC;
1	fimo	nucleotide_motif	10182604	10182610	35	+	.	Name=DARACWW_1:10182598-10182611(+)+;Alias=MEME-1;ID=DARACWW-MEME-1-1-1:10182598-10182611(+);pvalue=0.000319;qvalue=0.0508;sequence=TAAACTT;
1	fimo	nucleotide_motif	10223387	10223393	24.3	-	.	Name=DARACWW_1:10223379-10223396(-)+;Alias=MEME-1;ID=DARACWW-MEME-1-1-1:10223379-10223396(-);pvalue=0.00367;qvalue=0.0857;sequence=AAGACAC;
1	fimo	nucleotide_motif	10254561	10254567	29.3	+	.	Name=DARACWW_1:10254554-10254568(+)+;Alias=MEME-1;ID=DARACWW-MEME-1-1-1:10254554-10254568(+);pvalue=0.00116;qvalue=0.0681;sequence=AAGACTA;
1	fimo	nucleotide_motif	10258503	10258509	31.3	-	.	Name=DARACWW_1:10258499-10258512(-)+;Alias=MEME-1;ID=DARACWW-MEME-1-1-1:10258499-10258512(-);pvalue=0.000737;qvalue=0.0566;sequence=AAGACAT;
1	fimo	nucleotide_motif	10277898	10277904	34	-	.	Name=DARACWW_1:10277894-10277907(-)+;Alias=MEME-1;ID=DARACWW-MEME-1-1-1:10277894-10277907(-);pvalue=0.0004;qvalue=0.0508;sequence=GAAACTT;
1	fimo	nucleotide_motif	10286386	10286392	23.7	-	.	Name=DARACWW_1:10286382-10286395(-)+;Alias=MEME-1;ID=DARACWW-MEME-1-1-1:10286382-10286395(-);pvalue=0.00431;qvalue=0.0905;sequence=AGGACTC;
1	fimo	nucleotide_motif	10310286	10310292	24.9	-	.	Name=DARACWW_1:10310282-10310295(-)+;Alias=MEME-1;ID=DARACWW-MEME-1-1-1:10310282-10310295(-);pvalue=0.00323;qvalue=0.0822;sequence=AAGACAA;
1	fimo	nucleotide_motif	10498407	10498413	23	-	.	Name=DARACWW_1:10498403-10498416(-)+;Alias=MEME-1;ID=DARACWW-MEME-1-1-1:10498403-10498416(-);pvalue=0.00506;qvalue=0.0905;sequence=TTGACTT;
1	fimo	nucleotide_motif	10508978	10508984	41.1	+	.	Name=DARACWW_1:10508972-10508985(+)+;Alias=MEME-1;ID=DARACWW-MEME-1-1-1:10508972-10508985(+);pvalue=7.71e-05;qvalue=0.0467;sequence=TAGACTT;
1	fimo	nucleotide_motif	10640599	10640605	25.7	+	.	Name=DARACWW_1:10640593-10640606(+)+;Alias=MEME-1;ID=DARACWW-MEME-1-1-1:10640593-10640606(+);pvalue=0.00267;qvalue=0.0794;sequence=TAGACTG;
1	fimo	nucleotide_motif	10658639	10658645	26.7	+	.	Name=DARACWW_1:10658633-10658646(+)+;Alias=MEME-1;ID=DARACWW-MEME-1-1-1:10658633-10658646(+);pvalue=0.00212;qvalue=0.0766;sequence=GAAACTA;
1	fimo	nucleotide_motif	10685973	10685979	26.5	-	.	Name=DARACWW_1:10685969-10685983(-)+;Alias=MEME-1;ID=DARACWW-MEME-1-1-1:10685969-10685983(-);pvalue=0.00222;qvalue=0.0769;sequence=AAAACTA;
1	fimo	nucleotide_motif	10685979	10685985	23.3	-	.	Name=DARACWW_1:10685975-10685988(-)+;Alias=MEME-1;ID=DARACWW-MEME-1-1-1:10685975-10685988(-);pvalue=0.00471;qvalue=0.0905;sequence=GAAACAA;
1	fimo	nucleotide_motif	10718954	10718960	28.2	+	.	Name=DARACWW_1:10718948-10718962(+)+;Alias=MEME-1;ID=DARACWW-MEME-1-1-1:10718948-10718962(+);pvalue=0.00151;qvalue=0.0732;sequence=TAAACAT;
1	fimo	nucleotide_motif	10737719	10737725	24.9	+	.	Name=DARACWW_1:10737713-10737726(+)+;Alias=MEME-1;ID=DARACWW-MEME-1-1-1:10737713-10737726(+);pvalue=0.00323;qvalue=0.0822;sequence=TAGACCT;
1	fimo	nucleotide_motif	10737726	10737732	26	+	.	Name=DARACWW_1:10737722-10737735(+)+;Alias=MEME-1;ID=DARACWW-MEME-1-1-1:10737722-10737735(+);pvalue=0.00252;qvalue=0.0778;sequence=AAAACTC;
1	fimo	nucleotide_motif	10831780	10831786	22.1	-	.	Name=DARACWW_1:10831776-10831789(-)+;Alias=MEME-1;ID=DARACWW-MEME-1-1-1:10831776-10831789(-);pvalue=0.00612;qvalue=0.0968;sequence=TAGACAG;
1	fimo	nucleotide_motif	10831798	10831804	31.3	-	.	Name=DARACWW_1:10831794-10831807(-)+;Alias=MEME-1;ID=DARACWW-MEME-1-1-1:10831794-10831807(-);pvalue=0.000737;qvalue=0.0566;sequence=AAGACAT;
1	fimo	nucleotide_motif	10858493	10858499	22.8	-	.	Name=DARACWW_1:10858489-10858502(-)+;Alias=MEME-1;ID=DARACWW-MEME-1-1-1:10858489-10858502(-);pvalue=0.0053;qvalue=0.093;sequence=AGAACAT;
1	fimo	nucleotide_motif	10945105	10945111	29.7	-	.	Name=DARACWW_1:10945103-10945116(-)+;Alias=MEME-1;ID=DARACWW-MEME-1-1-1:10945103-10945116(-);pvalue=0.00108;qvalue=0.0664;sequence=TAGACTC;
1	fimo	nucleotide_motif	11114816	11114822	29.7	-	.	Name=DARACWW_1:11114812-11114825(-)+;Alias=MEME-1;ID=DARACWW-MEME-1-1-1:11114812-11114825(-);pvalue=0.00108;qvalue=0.0664;sequence=TAGACTC;
1	fimo	nucleotide_motif	11134267	11134273	21.7	+	.	Name=DARACWW_1:11134265-11134279(+)+;Alias=MEME-1;ID=DARACWW-MEME-1-1-1:11134265-11134279(+);pvalue=0.00671;qvalue=0.0992;sequence=GGAACTC;
1	fimo	nucleotide_motif	11142782	11142788	23.3	-	.	Name=DARACWW_1:11142778-11142791(-)+;Alias=MEME-1;ID=DARACWW-MEME-1-1-1:11142778-11142791(-);pvalue=0.00471;qvalue=0.0905;sequence=GAAACTG;
1	fimo	nucleotide_motif	11146799	11146805	36.5	+	.	Name=DARACWW_1:11146792-11146806(+)+;Alias=MEME-1;ID=DARACWW-MEME-1-1-1:11146792-11146806(+);pvalue=0.000224;qvalue=0.0467;sequence=AAGACTT;
1	fimo	nucleotide_motif	11158672	11158678	27.3	-	.	Name=DARACWW_1:11158665-11158679(-)+;Alias=MEME-1;ID=DARACWW-MEME-1-1-1:11158665-11158679(-);pvalue=0.00188;qvalue=0.0756;sequence=CAAACTT;
1	fimo	nucleotide_motif	11158698	11158704	21.9	-	.	Name=DARACWW_1:11158693-11158706(-)+;Alias=MEME-1;ID=DARACWW-MEME-1-1-1:11158693-11158706(-);pvalue=0.00642;qvalue=0.0978;sequence=GAGATTT;
1	fimo	nucleotide_motif	11214919	11214925	22.2	-	.	Name=DARACWW_1:11214916-11214929(-)+;Alias=MEME-1;ID=DARACWW-MEME-1-1-1:11214916-11214929(-);pvalue=0.00599;qvalue=0.0965;sequence=AAAACCT;
1	fimo	nucleotide_motif	11214936	11214942	23	-	.	Name=DARACWW_1:11214933-11214946(-)+;Alias=MEME-1;ID=DARACWW-MEME-1-1-1:11214933-11214946(-);pvalue=0.00506;qvalue=0.0905;sequence=AAAACAA;
1	fimo	nucleotide_motif	11331040	11331046	21.9	-	.	Name=DARACWW_1:11331035-11331048(-)+;Alias=MEME-1;ID=DARACWW-MEME-1-1-1:11331035-11331048(-);pvalue=0.00652;qvalue=0.0978;sequence=AAGATTT;
1	fimo	nucleotide_motif	11399556	11399562	22.9	+	.	Name=DARACWW_1:11399551-11399564(+)+;Alias=MEME-1;ID=DARACWW-MEME-1-1-1:11399551-11399564(+);pvalue=0.00513;qvalue=0.0914;sequence=GGAACAT;
1	fimo	nucleotide_motif	11399619	11399625	21.9	+	.	Name=DARACWW_1:11399612-11399625(+)+;Alias=MEME-1;ID=DARACWW-MEME-1-1-1:11399612-11399625(+);pvalue=0.00652;qvalue=0.0978;sequence=AAGATTT;
1	fimo	nucleotide_motif	11411069	11411075	36.5	-	.	Name=DARACWW_1:11411065-11411078(-)+;Alias=MEME-1;ID=DARACWW-MEME-1-1-1:11411065-11411078(-);pvalue=0.000224;qvalue=0.0467;sequence=AAGACTT;
1	fimo	nucleotide_motif	11461718	11461724	41.1	+	.	Name=DARACWW_1:11461712-11461725(+)+;Alias=MEME-1;ID=DARACWW-MEME-1-1-1:11461712-11461725(+);pvalue=7.71e-05;qvalue=0.0467;sequence=TAGACTT;
1	fimo	nucleotide_motif	11461785	11461791	33	+	.	Name=DARACWW_1:11461778-11461791(+)+;Alias=MEME-1;ID=DARACWW-MEME-1-1-1:11461778-11461791(+);pvalue=0.0005;qvalue=0.0508;sequence=AAAACTT;
1	fimo	nucleotide_motif	11468981	11468987	26.1	+	.	Name=DARACWW_1:11468980-11468993(+)+;Alias=MEME-1;ID=DARACWW-MEME-1-1-1:11468980-11468993(+);pvalue=0.00244;qvalue=0.0778;sequence=GAAACTC;
1	fimo	nucleotide_motif	11482812	11482818	23	+	.	Name=DARACWW_1:11482805-11482818(+)+;Alias=MEME-1;ID=DARACWW-MEME-1-1-1:11482805-11482818(+);pvalue=0.00506;qvalue=0.0905;sequence=AAAACAA;
1	fimo	nucleotide_motif	11537409	11537415	21.9	-	.	Name=DARACWW_1:11537404-11537417(-)+;Alias=MEME-1;ID=DARACWW-MEME-1-1-1:11537404-11537417(-);pvalue=0.00642;qvalue=0.0978;sequence=GAGATTT;
1	fimo	nucleotide_motif	11558872	11558878	23.3	-	.	Name=DARACWW_1:11558868-11558881(-)+;Alias=MEME-1;ID=DARACWW-MEME-1-1-1:11558868-11558881(-);pvalue=0.00471;qvalue=0.0905;sequence=TAAACAC;
1	fimo	nucleotide_motif	11558945	11558951	22.5	-	.	Name=DARACWW_1:11558939-11558953(-)+;Alias=MEME-1;ID=DARACWW-MEME-1-1-1:11558939-11558953(-);pvalue=0.00567;qvalue=0.0952;sequence=AAAACAC;
1	fimo	nucleotide_motif	11593012	11593018	27.7	-	.	Name=DARACWW_1:11593008-11593022(-)+;Alias=MEME-1;ID=DARACWW-MEME-1-1-1:11593008-11593022(-);pvalue=0.0017;qvalue=0.0732;sequence=AAAACAT;
1	fimo	nucleotide_motif	11605967	11605973	26	-	.	Name=DARACWW_1:11605963-11605976(-)+;Alias=MEME-1;ID=DARACWW-MEME-1-1-1:11605963-11605976(-);pvalue=0.00252;qvalue=0.0778;sequence=AAAACTC;
1	fimo	nucleotide_motif	11615973	11615979	23	+	.	Name=DARACWW_1:11615967-11615982(+)+;Alias=MEME-1;ID=DARACWW-MEME-1-1-1:11615967-11615982(+);pvalue=0.00506;qvalue=0.0905;sequence=TTGACTT;
1	fimo	nucleotide_motif	11615990	11615996	41.1	+	.	Name=DARACWW_1:11615984-11615997(+)+;Alias=MEME-1;ID=DARACWW-MEME-1-1-1:11615984-11615997(+);pvalue=7.71e-05;qvalue=0.0467;sequence=TAGACTT;
1	fimo	nucleotide_motif	11616130	11616136	27.7	+	.	Name=DARACWW_1:11616123-11616136(+)+;Alias=MEME-1;ID=DARACWW-MEME-1-1-1:11616123-11616136(+);pvalue=0.0017;qvalue=0.0732;sequence=AAAACAT;
1	fimo	nucleotide_motif	11689224	11689230	26	-	.	Name=DARACWW_1:11689218-11689232(-)+;Alias=MEME-1;ID=DARACWW-MEME-1-1-1:11689218-11689232(-);pvalue=0.00252;qvalue=0.0778;sequence=AAAACTC;
1	fimo	nucleotide_motif	11739182	11739188	36.5	+	.	Name=DARACWW_1:11739178-11739191(+)+;Alias=MEME-1;ID=DARACWW-MEME-1-1-1:11739178-11739191(+);pvalue=0.000224;qvalue=0.0467;sequence=AAGACTT;
1	fimo	nucleotide_motif	11739320	11739326	28.7	-	.	Name=DARACWW_1:11739313-11739327(-)+;Alias=MEME-1;ID=DARACWW-MEME-1-1-1:11739313-11739327(-);pvalue=0.00134;qvalue=0.073;sequence=GAGACTC;
1	fimo	nucleotide_motif	11749955	11749961	26.5	-	.	Name=DARACWW_1:11749951-11749965(-)+;Alias=MEME-1;ID=DARACWW-MEME-1-1-1:11749951-11749965(-);pvalue=0.00222;qvalue=0.0769;sequence=AAAACTA;
1	fimo	nucleotide_motif	11771930	11771936	30.5	-	.	Name=DARACWW_1:11771928-11771941(-)+;Alias=MEME-1;ID=DARACWW-MEME-1-1-1:11771928-11771941(-);pvalue=0.000882;qvalue=0.0619;sequence=CAGACTT;
1	fimo	nucleotide_motif	11785571	11785577	26.5	+	.	Name=DARACWW_1:11785564-11785577(+)+;Alias=MEME-1;ID=DARACWW-MEME-1-1-1:11785564-11785577(+);pvalue=0.00222;qvalue=0.0769;sequence=AAAACTA;
1	fimo	nucleotide_motif	11874975	11874981	22.2	-	.	Name=DARACWW_1:11874973-11874986(-)+;Alias=MEME-1;ID=DARACWW-MEME-1-1-1:11874973-11874986(-);pvalue=0.00599;qvalue=0.0965;sequence=AAAACCT;
1	fimo	nucleotide_motif	11875088	11875094	25.6	-	.	Name=DARACWW_1:11875084-11875097(-)+;Alias=MEME-1;ID=DARACWW-MEME-1-1-1:11875084-11875097(-);pvalue=0.00274;qvalue=0.0794;sequence=CAGACAT;
1	fimo	nucleotide_motif	11967906	11967912	23.7	-	.	Name=DARACWW_1:11967898-11967912(-)+;Alias=MEME-1;ID=DARACWW-MEME-1-1-1:11967898-11967912(-);pvalue=0.00431;qvalue=0.0905;sequence=TAAACAA;
1	fimo	nucleotide_motif	12008704	12008710	24.9	+	.	Name=DARACWW_1:12008697-12008711(+)+;Alias=MEME-1;ID=DARACWW-MEME-1-1-1:12008697-12008711(+);pvalue=0.00323;qvalue=0.0822;sequence=AAGACAA;
1	fimo	nucleotide_motif	12012308	12012314	23	+	.	Name=DARACWW_1:12012302-12012317(+)+;Alias=MEME-1;ID=DARACWW-MEME-1-1-1:12012302-12012317(+);pvalue=0.00506;qvalue=0.0905;sequence=TAAACCT;
1	fimo	nucleotide_motif	12012362	12012368	25.2	+	.	Name=DARACWW_1:12012356-12012369(+)+;Alias=MEME-1;ID=DARACWW-MEME-1-1-1:12012356-12012369(+);pvalue=0.003;qvalue=0.0822;sequence=GAGACAA;
1	fimo	nucleotide_motif	12024585	12024591	26	+	.	Name=DARACWW_1:12024578-12024591(+)+;Alias=MEME-1;ID=DARACWW-MEME-1-1-1:12024578-12024591(+);pvalue=0.00252;qvalue=0.0778;sequence=AAAACTC;
1	fimo	nucleotide_motif	12024621	12024627	21.9	+	.	Name=DARACWW_1:12024615-12024628(+)+;Alias=MEME-1;ID=DARACWW-MEME-1-1-1:12024615-12024628(+);pvalue=0.00642;qvalue=0.0978;sequence=GAGATTT;
1	fimo	nucleotide_motif	12146996	12147002	29.3	+	.	Name=DARACWW_1:12146989-12147003(+)+;Alias=MEME-1;ID=DARACWW-MEME-1-1-1:12146989-12147003(+);pvalue=0.00116;qvalue=0.0681;sequence=AAGACTA;
1	fimo	nucleotide_motif	12147003	12147009	26	+	.	Name=DARACWW_1:12146998-12147011(+)+;Alias=MEME-1;ID=DARACWW-MEME-1-1-1:12146998-12147011(+);pvalue=0.00252;qvalue=0.0778;sequence=AAAACTC;
1	fimo	nucleotide_motif	12147112	12147118	23.3	+	.	Name=DARACWW_1:12147106-12147119(+)+;Alias=MEME-1;ID=DARACWW-MEME-1-1-1:12147106-12147119(+);pvalue=0.00471;qvalue=0.0905;sequence=GAAACTG;
1	fimo	nucleotide_motif	12358123	12358129	22.1	-	.	Name=DARACWW_1:12358119-12358132(-)+;Alias=MEME-1;ID=DARACWW-MEME-1-1-1:12358119-12358132(-);pvalue=0.00612;qvalue=0.0968;sequence=TAGACAG;
1	fimo	nucleotide_motif	12454012	12454018	34	+	.	Name=DARACWW_1:12454006-12454019(+)+;Alias=MEME-1;ID=DARACWW-MEME-1-1-1:12454006-12454019(+);pvalue=0.0004;qvalue=0.0508;sequence=GAAACTT;
1	fimo	nucleotide_motif	12587915	12587921	28.2	-	.	Name=DARACWW_1:12587911-12587925(-)+;Alias=MEME-1;ID=DARACWW-MEME-1-1-1:12587911-12587925(-);pvalue=0.00151;qvalue=0.0732;sequence=TAAACAT;
1	fimo	nucleotide_motif	13079616	13079622	41.1	+	.	Name=DARACWW_1:13079610-13079623(+)+;Alias=MEME-1;ID=DARACWW-MEME-1-1-1:13079610-13079623(+);pvalue=7.71e-05;qvalue=0.0467;sequence=TAGACTT;
1	fimo	nucleotide_motif	13122350	13122356	41.1	-	.	Name=DARACWW_1:13122348-13122361(-)+;Alias=MEME-1;ID=DARACWW-MEME-1-1-1:13122348-13122361(-);pvalue=7.71e-05;qvalue=0.0467;sequence=TAGACTT;
1	fimo	nucleotide_motif	13122356	13122362	24.8	-	.	Name=DARACWW_1:13122350-13122363(-)+;Alias=MEME-1;ID=DARACWW-MEME-1-1-1:13122350-13122363(-);pvalue=0.00328;qvalue=0.0832;sequence=GGGACAT;
1	fimo	nucleotide_motif	13122368	13122374	33	-	.	Name=DARACWW_1:13122361-13122374(-)+;Alias=MEME-1;ID=DARACWW-MEME-1-1-1:13122361-13122374(-);pvalue=0.0005;qvalue=0.0508;sequence=AAAACTT;
1	fimo	nucleotide_motif	13227049	13227055	22.2	+	.	Name=DARACWW_1:13227044-13227057(+)+;Alias=MEME-1;ID=DARACWW-MEME-1-1-1:13227044-13227057(+);pvalue=0.00599;qvalue=0.0965;sequence=AAAACCT;
1	fimo	nucleotide_motif	13543811	13543817	25.5	+	.	Name=DARACWW_1:13543807-13543820(+)+;Alias=MEME-1;ID=DARACWW-MEME-1-1-1:13543807-13543820(+);pvalue=0.00281;qvalue=0.0801;sequence=TGGACAT;
1	fimo	nucleotide_motif	13674051	13674057	24.9	+	.	Name=DARACWW_1:13674045-13674058(+)+;Alias=MEME-1;ID=DARACWW-MEME-1-1-1:13674045-13674058(+);pvalue=0.00323;qvalue=0.0822;sequence=AAGACTG;
1	fimo	nucleotide_motif	13898508	13898514	22.2	-	.	Name=DARACWW_1:13898504-13898518(-)+;Alias=MEME-1;ID=DARACWW-MEME-1-1-1:13898504-13898518(-);pvalue=0.00599;qvalue=0.0965;sequence=ATGACTT;
1	fimo	nucleotide_motif	14027339	14027345	30.5	-	.	Name=DARACWW_1:14027337-14027350(-)+;Alias=MEME-1;ID=DARACWW-MEME-1-1-1:14027337-14027350(-);pvalue=0.000882;qvalue=0.0619;sequence=CAGACTT;
1	fimo	nucleotide_motif	15651145	15651151	26.4	-	.	Name=DARACWW_1:15651139-15651152(-)+;Alias=MEME-1;ID=DARACWW-MEME-1-1-1:15651139-15651152(-);pvalue=0.00229;qvalue=0.0778;sequence=GGAACTT;
1	fimo	nucleotide_motif	15651176	15651182	27.7	-	.	Name=DARACWW_1:15651172-15651186(-)+;Alias=MEME-1;ID=DARACWW-MEME-1-1-1:15651172-15651186(-);pvalue=0.0017;qvalue=0.0732;sequence=AAAACAT;
1	fimo	nucleotide_motif	15651216	15651222	26.7	-	.	Name=DARACWW_1:15651210-15651226(-)+;Alias=MEME-1;ID=DARACWW-MEME-1-1-1:15651210-15651226(-);pvalue=0.00212;qvalue=0.0766;sequence=TAAACTC;
1	fimo	nucleotide_motif	16129717	16129723	24.9	+	.	Name=DARACWW_1:16129710-16129724(+)+;Alias=MEME-1;ID=DARACWW-MEME-1-1-1:16129710-16129724(+);pvalue=0.00323;qvalue=0.0822;sequence=AAGACTG;
1	fimo	nucleotide_motif	16268711	16268717	23.7	+	.	Name=DARACWW_1:16268705-16268718(+)+;Alias=MEME-1;ID=DARACWW-MEME-1-1-1:16268705-16268718(+);pvalue=0.00431;qvalue=0.0905;sequence=TAAACAA;
1	fimo	nucleotide_motif	16268790	16268796	38.4	+	.	Name=DARACWW_1:16268784-16268797(+)+;Alias=MEME-1;ID=DARACWW-MEME-1-1-1:16268784-16268797(+);pvalue=0.000143;qvalue=0.0467;sequence=GAGACTT;
1	fimo	nucleotide_motif	16482772	16482778	25.2	+	.	Name=DARACWW_1:16482768-16482781(+)+;Alias=MEME-1;ID=DARACWW-MEME-1-1-1:16482768-16482781(+);pvalue=0.003;qvalue=0.0822;sequence=GAGACAA;
1	fimo	nucleotide_motif	16796501	16796507	23.6	-	.	Name=DARACWW_1:16796495-16796511(-)+;Alias=MEME-1;ID=DARACWW-MEME-1-1-1:16796495-16796511(-);pvalue=0.00439;qvalue=0.0905;sequence=CAAACAT;
1	fimo	nucleotide_motif	16848496	16848502	26.2	-	.	Name=DARACWW_1:16848490-16848503(-)+;Alias=MEME-1;ID=DARACWW-MEME-1-1-1:16848490-16848503(-);pvalue=0.00237;qvalue=0.0778;sequence=AGAACTT;
1	fimo	nucleotide_motif	16873246	16873252	25.2	+	.	Name=DARACWW_1:16873242-16873255(+)+;Alias=MEME-1;ID=DARACWW-MEME-1-1-1:16873242-16873255(+);pvalue=0.003;qvalue=0.0822;sequence=GAGACAA;
1	fimo	nucleotide_motif	16907749	16907755	28.7	-	.	Name=DARACWW_1:16907747-16907760(-)+;Alias=MEME-1;ID=DARACWW-MEME-1-1-1:16907747-16907760(-);pvalue=0.00134;qvalue=0.073;sequence=GAGACTC;
1	fimo	nucleotide_motif	17011654	17011660	26	+	.	Name=DARACWW_1:17011646-17011660(+)+;Alias=MEME-1;ID=DARACWW-MEME-1-1-1:17011646-17011660(+);pvalue=0.00252;qvalue=0.0778;sequence=AAAACTC;
1	fimo	nucleotide_motif	17011732	17011738	23.3	+	.	Name=DARACWW_1:17011726-17011739(+)+;Alias=MEME-1;ID=DARACWW-MEME-1-1-1:17011726-17011739(+);pvalue=0.00471;qvalue=0.0905;sequence=TAAACAC;
1	fimo	nucleotide_motif	17180800	17180806	41.1	+	.	Name=DARACWW_1:17180794-17180807(+)+;Alias=MEME-1;ID=DARACWW-MEME-1-1-1:17180794-17180807(+);pvalue=7.71e-05;qvalue=0.0467;sequence=TAGACTT;
1	fimo	nucleotide_motif	17193098	17193104	22.5	+	.	Name=DARACWW_1:17193090-17193104(+)+;Alias=MEME-1;ID=DARACWW-MEME-1-1-1:17193090-17193104(+);pvalue=0.00567;qvalue=0.0952;sequence=AAAACAC;
1	fimo	nucleotide_motif	17200693	17200699	27.4	+	.	Name=DARACWW_1:17200687-17200700(+)+;Alias=MEME-1;ID=DARACWW-MEME-1-1-1:17200687-17200700(+);pvalue=0.0018;qvalue=0.0746;sequence=TAAACTA;
1	fimo	nucleotide_motif	17298104	17298110	22.2	-	.	Name=DARACWW_1:17298100-17298113(-)+;Alias=MEME-1;ID=DARACWW-MEME-1-1-1:17298100-17298113(-);pvalue=0.00599;qvalue=0.0965;sequence=ATGACTT;
1	fimo	nucleotide_motif	17321190	17321196	23.3	-	.	Name=DARACWW_1:17321186-17321199(-)+;Alias=MEME-1;ID=DARACWW-MEME-1-1-1:17321186-17321199(-);pvalue=0.00471;qvalue=0.0905;sequence=GAAACAA;
1	fimo	nucleotide_motif	17321338	17321344	21.8	-	.	Name=DARACWW_1:17321334-17321347(-)+;Alias=MEME-1;ID=DARACWW-MEME-1-1-1:17321334-17321347(-);pvalue=0.00665;qvalue=0.0986;sequence=AAGACAG;
1	fimo	nucleotide_motif	17331881	17331887	28.2	+	.	Name=DARACWW_1:17331875-17331888(+)+;Alias=MEME-1;ID=DARACWW-MEME-1-1-1:17331875-17331888(+);pvalue=0.00151;qvalue=0.0732;sequence=TAAACAT;
1	fimo	nucleotide_motif	17395595	17395601	26.7	-	.	Name=DARACWW_1:17395589-17395602(-)+;Alias=MEME-1;ID=DARACWW-MEME-1-1-1:17395589-17395602(-);pvalue=0.00212;qvalue=0.0766;sequence=TAAACTC;
1	fimo	nucleotide_motif	17395673	17395679	31.3	-	.	Name=DARACWW_1:17395672-17395685(-)+;Alias=MEME-1;ID=DARACWW-MEME-1-1-1:17395672-17395685(-);pvalue=0.000737;qvalue=0.0566;sequence=AAGACAT;
1	fimo	nucleotide_motif	17427316	17427322	25.5	+	.	Name=DARACWW_1:17427312-17427325(+)+;Alias=MEME-1;ID=DARACWW-MEME-1-1-1:17427312-17427325(+);pvalue=0.00281;qvalue=0.0801;sequence=TGGACAT;
1	fimo	nucleotide_motif	17427356	17427362	29.1	+	.	Name=DARACWW_1:17427351-17427365(+)+;Alias=MEME-1;ID=DARACWW-MEME-1-1-1:17427351-17427365(+);pvalue=0.00122;qvalue=0.0702;sequence=GGGACTT;
1	fimo	nucleotide_motif	17434939	17434945	25.5	+	.	Name=DARACWW_1:17434935-17434948(+)+;Alias=MEME-1;ID=DARACWW-MEME-1-1-1:17434935-17434948(+);pvalue=0.00281;qvalue=0.0801;sequence=TGGACAT;
1	fimo	nucleotide_motif	17434978	17434984	38.4	+	.	Name=DARACWW_1:17434972-17434985(+)+;Alias=MEME-1;ID=DARACWW-MEME-1-1-1:17434972-17434985(+);pvalue=0.000143;qvalue=0.0467;sequence=GAGACTT;
1	fimo	nucleotide_motif	17454283	17454289	41.1	+	.	Name=DARACWW_1:17454277-17454290(+)+;Alias=MEME-1;ID=DARACWW-MEME-1-1-1:17454277-17454290(+);pvalue=7.71e-05;qvalue=0.0467;sequence=TAGACTT;
1	fimo	nucleotide_motif	17613159	17613165	21.9	-	.	Name=DARACWW_1:17613154-17613167(-)+;Alias=MEME-1;ID=DARACWW-MEME-1-1-1:17613154-17613167(-);pvalue=0.00642;qvalue=0.0978;sequence=GAGATTT;
1	fimo	nucleotide_motif	17613246	17613252	25.7	-	.	Name=DARACWW_1:17613242-17613255(-)+;Alias=MEME-1;ID=DARACWW-MEME-1-1-1:17613242-17613255(-);pvalue=0.00267;qvalue=0.0794;sequence=TAGACAA;
1	fimo	nucleotide_motif	17801935	17801941	31.3	+	.	Name=DARACWW_1:17801929-17801942(+)+;Alias=MEME-1;ID=DARACWW-MEME-1-1-1:17801929-17801942(+);pvalue=0.000737;qvalue=0.0566;sequence=AAGACAT;
1	fimo	nucleotide_motif	17848440	17848446	24.2	+	.	Name=DARACWW_1:17848434-17848447(+)+;Alias=MEME-1;ID=DARACWW-MEME-1-1-1:17848434-17848447(+);pvalue=0.00379;qvalue=0.0872;sequence=AAGACCT;
1	fimo	nucleotide_motif	17868297	17868303	21.9	+	.	Name=DARACWW_1:17868294-17868307(+)+;Alias=MEME-1;ID=DARACWW-MEME-1-1-1:17868294-17868307(+);pvalue=0.00642;qvalue=0.0978;sequence=GAGATTT;
1	fimo	nucleotide_motif	17886115	17886121	30.5	-	.	Name=DARACWW_1:17886113-17886126(-)+;Alias=MEME-1;ID=DARACWW-MEME-1-1-1:17886113-17886126(-);pvalue=0.000882;qvalue=0.0619;sequence=CAGACTT;
1	fimo	nucleotide_motif	17896723	17896729	21.8	-	.	Name=DARACWW_1:17896721-17896735(-)+;Alias=MEME-1;ID=DARACWW-MEME-1-1-1:17896721-17896735(-);pvalue=0.00665;qvalue=0.0986;sequence=AAGACAG;
1	fimo	nucleotide_motif	17908427	17908433	26.7	+	.	Name=DARACWW_1:17908421-17908434(+)+;Alias=MEME-1;ID=DARACWW-MEME-1-1-1:17908421-17908434(+);pvalue=0.00212;qvalue=0.0766;sequence=GAAACTA;
1	fimo	nucleotide_motif	17922090	17922096	24.8	-	.	Name=DARACWW_1:17922086-17922099(-)+;Alias=MEME-1;ID=DARACWW-MEME-1-1-1:17922086-17922099(-);pvalue=0.00328;qvalue=0.0832;sequence=GGGACAT;
1	fimo	nucleotide_motif	17942579	17942585	32.3	+	.	Name=DARACWW_1:17942575-17942588(+)+;Alias=MEME-1;ID=DARACWW-MEME-1-1-1:17942575-17942588(+);pvalue=0.000582;qvalue=0.0548;sequence=TAGACAT;
1	fimo	nucleotide_motif	17942628	17942634	22.5	+	.	Name=DARACWW_1:17942623-17942636(+)+;Alias=MEME-1;ID=DARACWW-MEME-1-1-1:17942623-17942636(+);pvalue=0.00567;qvalue=0.0952;sequence=TGAACTA;
1	fimo	nucleotide_motif	17969188	17969194	26.7	+	.	Name=DARACWW_1:17969186-17969199(+)+;Alias=MEME-1;ID=DARACWW-MEME-1-1-1:17969186-17969199(+);pvalue=0.00212;qvalue=0.0766;sequence=TAAACTC;
1	fimo	nucleotide_motif	17973865	17973871	25.7	-	.	Name=DARACWW_1:17973861-17973874(-)+;Alias=MEME-1;ID=DARACWW-MEME-1-1-1:17973861-17973874(-);pvalue=0.00267;qvalue=0.0794;sequence=TAGACTG;
1	fimo	nucleotide_motif	18059707	18059713	34	-	.	Name=DARACWW_1:18059701-18059714(-)+;Alias=MEME-1;ID=DARACWW-MEME-1-1-1:18059701-18059714(-);pvalue=0.0004;qvalue=0.0508;sequence=GAAACTT;
1	fimo	nucleotide_motif	18059767	18059773	31.3	-	.	Name=DARACWW_1:18059763-18059776(-)+;Alias=MEME-1;ID=DARACWW-MEME-1-1-1:18059763-18059776(-);pvalue=0.000737;qvalue=0.0566;sequence=AAGACAT;
1	fimo	nucleotide_motif	18065047	18065053	23	-	.	Name=DARACWW_1:18065044-18065057(-)+;Alias=MEME-1;ID=DARACWW-MEME-1-1-1:18065044-18065057(-);pvalue=0.00506;qvalue=0.0905;sequence=AAAACAA;
1	fimo	nucleotide_motif	18068758	18068764	21.9	-	.	Name=DARACWW_1:18068753-18068766(-)+;Alias=MEME-1;ID=DARACWW-MEME-1-1-1:18068753-18068766(-);pvalue=0.00642;qvalue=0.0978;sequence=GAGATTT;
1	fimo	nucleotide_motif	18068880	18068886	26	-	.	Name=DARACWW_1:18068879-18068892(-)+;Alias=MEME-1;ID=DARACWW-MEME-1-1-1:18068879-18068892(-);pvalue=0.00252;qvalue=0.0778;sequence=AAAACTC;
1	fimo	nucleotide_motif	18176890	18176896	30.2	-	.	Name=DARACWW_1:18176885-18176899(-)+;Alias=MEME-1;ID=DARACWW-MEME-1-1-1:18176885-18176899(-);pvalue=0.000945;qvalue=0.0635;sequence=TGGACTT;
1	fimo	nucleotide_motif	18176908	18176914	27.7	-	.	Name=DARACWW_1:18176904-18176917(-)+;Alias=MEME-1;ID=DARACWW-MEME-1-1-1:18176904-18176917(-);pvalue=0.0017;qvalue=0.0732;sequence=AAAACAT;
1	fimo	nucleotide_motif	18218144	18218150	22.1	+	.	Name=DARACWW_1:18218138-18218152(+)+;Alias=MEME-1;ID=DARACWW-MEME-1-1-1:18218138-18218152(+);pvalue=0.00612;qvalue=0.0968;sequence=CAAACTC;
1	fimo	nucleotide_motif	18218200	18218206	22.1	+	.	Name=DARACWW_1:18218198-18218212(+)+;Alias=MEME-1;ID=DARACWW-MEME-1-1-1:18218198-18218212(+);pvalue=0.00612;qvalue=0.0968;sequence=CAAACTC;
1	fimo	nucleotide_motif	18218212	18218218	23	+	.	Name=DARACWW_1:18218205-18218218(+)+;Alias=MEME-1;ID=DARACWW-MEME-1-1-1:18218205-18218218(+);pvalue=0.00506;qvalue=0.0905;sequence=AAAACAA;
1	fimo	nucleotide_motif	18218226	18218232	24.3	+	.	Name=DARACWW_1:18218219-18218237(+)+;Alias=MEME-1;ID=DARACWW-MEME-1-1-1:18218219-18218237(+);pvalue=0.00367;qvalue=0.0857;sequence=TGGACTA;
1	fimo	nucleotide_motif	18279340	18279346	23	+	.	Name=DARACWW_1:18279332-18279346(+)+;Alias=MEME-1;ID=DARACWW-MEME-1-1-1:18279332-18279346(+);pvalue=0.00506;qvalue=0.0905;sequence=AAAACTG;
1	fimo	nucleotide_motif	18279346	18279352	34	+	.	Name=DARACWW_1:18279340-18279353(+)+;Alias=MEME-1;ID=DARACWW-MEME-1-1-1:18279340-18279353(+);pvalue=0.0004;qvalue=0.0508;sequence=GAAACTT;
1	fimo	nucleotide_motif	18285659	18285665	31.9	-	.	Name=DARACWW_1:18285655-18285668(-)+;Alias=MEME-1;ID=DARACWW-MEME-1-1-1:18285655-18285668(-);pvalue=0.000651;qvalue=0.0555;sequence=GAGACAT;
1	fimo	nucleotide_motif	18285682	18285688	24.2	-	.	Name=DARACWW_1:18285678-18285691(-)+;Alias=MEME-1;ID=DARACWW-MEME-1-1-1:18285678-18285691(-);pvalue=0.00379;qvalue=0.0872;sequence=AAGACCT;
1	fimo	nucleotide_motif	18354486	18354492	24.9	+	.	Name=DARACWW_1:18354480-18354493(+)+;Alias=MEME-1;ID=DARACWW-MEME-1-1-1:18354480-18354493(+);pvalue=0.00323;qvalue=0.0822;sequence=AAGACTG;
1	fimo	nucleotide_motif	18356938	18356944	38.4	-	.	Name=DARACWW_1:18356934-18356947(-)+;Alias=MEME-1;ID=DARACWW-MEME-1-1-1:18356934-18356947(-);pvalue=0.000143;qvalue=0.0467;sequence=GAGACTT;
1	fimo	nucleotide_motif	18381376	18381382	23.3	-	.	Name=DARACWW_1:18381372-18381385(-)+;Alias=MEME-1;ID=DARACWW-MEME-1-1-1:18381372-18381385(-);pvalue=0.00471;qvalue=0.0905;sequence=GAAACAA;
1	fimo	nucleotide_motif	18444906	18444912	24.9	+	.	Name=DARACWW_1:18444900-18444913(+)+;Alias=MEME-1;ID=DARACWW-MEME-1-1-1:18444900-18444913(+);pvalue=0.00323;qvalue=0.0822;sequence=AAGACAA;
1	fimo	nucleotide_motif	18473653	18473659	21.9	+	.	Name=DARACWW_1:18473650-18473663(+)+;Alias=MEME-1;ID=DARACWW-MEME-1-1-1:18473650-18473663(+);pvalue=0.00652;qvalue=0.0978;sequence=AAGATTT;
1	fimo	nucleotide_motif	18505497	18505503	34	+	.	Name=DARACWW_1:18505491-18505504(+)+;Alias=MEME-1;ID=DARACWW-MEME-1-1-1:18505491-18505504(+);pvalue=0.0004;qvalue=0.0508;sequence=GAAACTT;
1	fimo	nucleotide_motif	18519787	18519793	26.1	+	.	Name=DARACWW_1:18519781-18519794(+)+;Alias=MEME-1;ID=DARACWW-MEME-1-1-1:18519781-18519794(+);pvalue=0.00244;qvalue=0.0778;sequence=GAAACTC;
1	fimo	nucleotide_motif	18682067	18682073	32.3	-	.	Name=DARACWW_1:18682065-18682078(-)+;Alias=MEME-1;ID=DARACWW-MEME-1-1-1:18682065-18682078(-);pvalue=0.000582;qvalue=0.0548;sequence=TAGACAT;
1	fimo	nucleotide_motif	18687809	18687815	28.2	-	.	Name=DARACWW_1:18687805-18687818(-)+;Alias=MEME-1;ID=DARACWW-MEME-1-1-1:18687805-18687818(-);pvalue=0.00151;qvalue=0.0732;sequence=TAAACAT;
1	fimo	nucleotide_motif	18726323	18726329	25.2	-	.	Name=DARACWW_1:18726319-18726332(-)+;Alias=MEME-1;ID=DARACWW-MEME-1-1-1:18726319-18726332(-);pvalue=0.003;qvalue=0.0822;sequence=TAGACAC;
1	fimo	nucleotide_motif	18737316	18737322	26	-	.	Name=DARACWW_1:18737311-18737324(-)+;Alias=MEME-1;ID=DARACWW-MEME-1-1-1:18737311-18737324(-);pvalue=0.00252;qvalue=0.0778;sequence=AAAACTC;
1	fimo	nucleotide_motif	18872786	18872792	25.6	+	.	Name=DARACWW_1:18872780-18872793(+)+;Alias=MEME-1;ID=DARACWW-MEME-1-1-1:18872780-18872793(+);pvalue=0.00274;qvalue=0.0794;sequence=CAGACAT;
1	fimo	nucleotide_motif	18937513	18937519	23.5	+	.	Name=DARACWW_1:18937508-18937521(+)+;Alias=MEME-1;ID=DARACWW-MEME-1-1-1:18937508-18937521(+);pvalue=0.00447;qvalue=0.0905;sequence=TGAACAT;
1	fimo	nucleotide_motif	18937541	18937547	23.3	+	.	Name=DARACWW_1:18937535-18937548(+)+;Alias=MEME-1;ID=DARACWW-MEME-1-1-1:18937535-18937548(+);pvalue=0.00471;qvalue=0.0905;sequence=GAAACTG;
1	fimo	nucleotide_motif	18951605	18951611	21.9	+	.	Name=DARACWW_1:18951600-18951613(+)+;Alias=MEME-1;ID=DARACWW-MEME-1-1-1:18951600-18951613(+);pvalue=0.00642;qvalue=0.0978;sequence=AGAACTA;
1	fimo	nucleotide_motif	18951654	18951660	21.9	+	.	Name=DARACWW_1:18951650-18951664(+)+;Alias=MEME-1;ID=DARACWW-MEME-1-1-1:18951650-18951664(+);pvalue=0.00642;qvalue=0.0978;sequence=GAGATTT;
1	fimo	nucleotide_motif	18986365	18986371	26.4	+	.	Name=DARACWW_1:18986360-18986373(+)+;Alias=MEME-1;ID=DARACWW-MEME-1-1-1:18986360-18986373(+);pvalue=0.00229;qvalue=0.0778;sequence=GGAACTT;
1	fimo	nucleotide_motif	19102884	19102890	23.3	-	.	Name=DARACWW_1:19102880-19102893(-)+;Alias=MEME-1;ID=DARACWW-MEME-1-1-1:19102880-19102893(-);pvalue=0.00471;qvalue=0.0905;sequence=TAAACAC;
1	fimo	nucleotide_motif	19119786	19119792	25.7	-	.	Name=DARACWW_1:19119784-19119797(-)+;Alias=MEME-1;ID=DARACWW-MEME-1-1-1:19119784-19119797(-);pvalue=0.00267;qvalue=0.0794;sequence=TAGACTG;
1	fimo	nucleotide_motif	19119794	19119800	30.9	-	.	Name=DARACWW_1:19119792-19119805(-)+;Alias=MEME-1;ID=DARACWW-MEME-1-1-1:19119792-19119805(-);pvalue=0.000818;qvalue=0.0606;sequence=TAGACTA;
1	fimo	nucleotide_motif	19122213	19122219	33	-	.	Name=DARACWW_1:19122206-19122222(-)+;Alias=MEME-1;ID=DARACWW-MEME-1-1-1:19122206-19122222(-);pvalue=0.0005;qvalue=0.0508;sequence=AAAACTT;
1	fimo	nucleotide_motif	19122324	19122330	28.5	-	.	Name=DARACWW_1:19122322-19122335(-)+;Alias=MEME-1;ID=DARACWW-MEME-1-1-1:19122322-19122335(-);pvalue=0.00141;qvalue=0.0732;sequence=AAGACTC;
1	fimo	nucleotide_motif	19128308	19128314	22.1	-	.	Name=DARACWW_1:19128305-19128318(-)+;Alias=MEME-1;ID=DARACWW-MEME-1-1-1:19128305-19128318(-);pvalue=0.00612;qvalue=0.0968;sequence=TAGACAG;
1	fimo	nucleotide_motif	19153736	19153742	26	+	.	Name=DARACWW_1:19153730-19153747(+)+;Alias=MEME-1;ID=DARACWW-MEME-1-1-1:19153730-19153747(+);pvalue=0.00252;qvalue=0.0778;sequence=AAAACTC;
1	fimo	nucleotide_motif	19153845	19153851	28.5	+	.	Name=DARACWW_1:19153837-19153852(+)+;Alias=MEME-1;ID=DARACWW-MEME-1-1-1:19153837-19153852(+);pvalue=0.00141;qvalue=0.0732;sequence=AAGACTC;
1	fimo	nucleotide_motif	19158924	19158930	22.1	-	.	Name=DARACWW_1:19158918-19158931(-)+;Alias=MEME-1;ID=DARACWW-MEME-1-1-1:19158918-19158931(-);pvalue=0.00612;qvalue=0.0968;sequence=CAAACTC;
1	fimo	nucleotide_motif	19170234	19170240	26.7	+	.	Name=DARACWW_1:19170232-19170245(+)+;Alias=MEME-1;ID=DARACWW-MEME-1-1-1:19170232-19170245(+);pvalue=0.00212;qvalue=0.0766;sequence=GAAACTA;
1	fimo	nucleotide_motif	19170418	19170424	23	+	.	Name=DARACWW_1:19170414-19170427(+)+;Alias=MEME-1;ID=DARACWW-MEME-1-1-1:19170414-19170427(+);pvalue=0.00506;qvalue=0.0905;sequence=TTGACTT;
1	fimo	nucleotide_motif	19175766	19175772	28	-	.	Name=DARACWW_1:19175762-19175775(-)+;Alias=MEME-1;ID=DARACWW-MEME-1-1-1:19175762-19175775(-);pvalue=0.00159;qvalue=0.0732;sequence=GAAACAT;
1	fimo	nucleotide_motif	19201431	19201437	23.6	+	.	Name=DARACWW_1:19201425-19201438(+)+;Alias=MEME-1;ID=DARACWW-MEME-1-1-1:19201425-19201438(+);pvalue=0.00439;qvalue=0.0905;sequence=CAAACAT;
1	fimo	nucleotide_motif	19307193	19307199	35	+	.	Name=DARACWW_1:19307187-19307200(+)+;Alias=MEME-1;ID=DARACWW-MEME-1-1-1:19307187-19307200(+);pvalue=0.000319;qvalue=0.0508;sequence=TAAACTT;
1	fimo	nucleotide_motif	19438721	19438727	27.4	+	.	Name=DARACWW_1:19438715-19438728(+)+;Alias=MEME-1;ID=DARACWW-MEME-1-1-1:19438715-19438728(+);pvalue=0.0018;qvalue=0.0746;sequence=TAAACTA;
1	fimo	nucleotide_motif	19453654	19453660	22.5	-	.	Name=DARACWW_1:19453650-19453663(-)+;Alias=MEME-1;ID=DARACWW-MEME-1-1-1:19453650-19453663(-);pvalue=0.00567;qvalue=0.0952;sequence=GAAACCT;
1	fimo	nucleotide_motif	19455539	19455545	34	+	.	Name=DARACWW_1:19455533-19455546(+)+;Alias=MEME-1;ID=DARACWW-MEME-1-1-1:19455533-19455546(+);pvalue=0.0004;qvalue=0.0508;sequence=GAAACTT;
1	fimo	nucleotide_motif	19475090	19475096	25.5	-	.	Name=DARACWW_1:19475086-19475099(-)+;Alias=MEME-1;ID=DARACWW-MEME-1-1-1:19475086-19475099(-);pvalue=0.00281;qvalue=0.0801;sequence=TGGACAT;
1	fimo	nucleotide_motif	19497537	19497543	28.9	+	.	Name=DARACWW_1:19497533-19497546(+)+;Alias=MEME-1;ID=DARACWW-MEME-1-1-1:19497533-19497546(+);pvalue=0.00128;qvalue=0.0722;sequence=AGGACTT;
1	fimo	nucleotide_motif	19511420	19511426	26.5	+	.	Name=DARACWW_1:19511413-19511426(+)+;Alias=MEME-1;ID=DARACWW-MEME-1-1-1:19511413-19511426(+);pvalue=0.00222;qvalue=0.0769;sequence=AAAACTA;
1	fimo	nucleotide_motif	19531026	19531032	24.3	+	.	Name=DARACWW_1:19531022-19531035(+)+;Alias=MEME-1;ID=DARACWW-MEME-1-1-1:19531022-19531035(+);pvalue=0.00367;qvalue=0.0857;sequence=GAGACCT;
1	fimo	nucleotide_motif	19561610	19561616	23	-	.	Name=DARACWW_1:19561606-19561619(-)+;Alias=MEME-1;ID=DARACWW-MEME-1-1-1:19561606-19561619(-);pvalue=0.00506;qvalue=0.0905;sequence=AAAACAA;
1	fimo	nucleotide_motif	19573069	19573075	24.7	-	.	Name=DARACWW_1:19573067-19573080(-)+;Alias=MEME-1;ID=DARACWW-MEME-1-1-1:19573067-19573080(-);pvalue=0.00342;qvalue=0.0846;sequence=CAGACTA;
1	fimo	nucleotide_motif	19592560	19592566	24.9	+	.	Name=DARACWW_1:19592554-19592567(+)+;Alias=MEME-1;ID=DARACWW-MEME-1-1-1:19592554-19592567(+);pvalue=0.00323;qvalue=0.0822;sequence=AAGACAA;
1	fimo	nucleotide_motif	19592630	19592636	22.8	+	.	Name=DARACWW_1:19592624-19592638(+)+;Alias=MEME-1;ID=DARACWW-MEME-1-1-1:19592624-19592638(+);pvalue=0.0053;qvalue=0.093;sequence=CAAACTA;
1	fimo	nucleotide_motif	19615049	19615055	25.7	-	.	Name=DARACWW_1:19615047-19615060(-)+;Alias=MEME-1;ID=DARACWW-MEME-1-1-1:19615047-19615060(-);pvalue=0.00267;qvalue=0.0794;sequence=TAGACAA;
1	fimo	nucleotide_motif	19687848	19687854	23.3	+	.	Name=DARACWW_1:19687842-19687855(+)+;Alias=MEME-1;ID=DARACWW-MEME-1-1-1:19687842-19687855(+);pvalue=0.00471;qvalue=0.0905;sequence=GAAACAA;
1	fimo	nucleotide_motif	19713179	19713185	23.6	+	.	Name=DARACWW_1:19713173-19713186(+)+;Alias=MEME-1;ID=DARACWW-MEME-1-1-1:19713173-19713186(+);pvalue=0.00439;qvalue=0.0905;sequence=CAAACAT;
1	fimo	nucleotide_motif	19713185	19713191	23.7	+	.	Name=DARACWW_1:19713180-19713193(+)+;Alias=MEME-1;ID=DARACWW-MEME-1-1-1:19713180-19713193(+);pvalue=0.00431;qvalue=0.0905;sequence=TAAACAA;
1	fimo	nucleotide_motif	19740240	19740246	35	+	.	Name=DARACWW_1:19740234-19740247(+)+;Alias=MEME-1;ID=DARACWW-MEME-1-1-1:19740234-19740247(+);pvalue=0.000319;qvalue=0.0508;sequence=TAAACTT;
1	fimo	nucleotide_motif	19740286	19740292	26.5	+	.	Name=DARACWW_1:19740279-19740292(+)+;Alias=MEME-1;ID=DARACWW-MEME-1-1-1:19740279-19740292(+);pvalue=0.00222;qvalue=0.0769;sequence=AAAACTA;
1	fimo	nucleotide_motif	19794671	19794677	24.3	+	.	Name=DARACWW_1:19794667-19794680(+)+;Alias=MEME-1;ID=DARACWW-MEME-1-1-1:19794667-19794680(+);pvalue=0.00367;qvalue=0.0857;sequence=TGGACTA;
1	fimo	nucleotide_motif	19847637	19847643	33	+	.	Name=DARACWW_1:19847630-19847643(+)+;Alias=MEME-1;ID=DARACWW-MEME-1-1-1:19847630-19847643(+);pvalue=0.0005;qvalue=0.0508;sequence=AAAACTT;
1	fimo	nucleotide_motif	19854810	19854816	23	-	.	Name=DARACWW_1:19854806-19854820(-)+;Alias=MEME-1;ID=DARACWW-MEME-1-1-1:19854806-19854820(-);pvalue=0.00506;qvalue=0.0905;sequence=AAAACTG;
1	fimo	nucleotide_motif	19854822	19854828	22.1	-	.	Name=DARACWW_1:19854816-19854829(-)+;Alias=MEME-1;ID=DARACWW-MEME-1-1-1:19854816-19854829(-);pvalue=0.00612;qvalue=0.0968;sequence=CAAACTC;
1	fimo	nucleotide_motif	19864825	19864831	23	-	.	Name=DARACWW_1:19864821-19864836(-)+;Alias=MEME-1;ID=DARACWW-MEME-1-1-1:19864821-19864836(-);pvalue=0.00506;qvalue=0.0905;sequence=AAAACTG;
1	fimo	nucleotide_motif	19891099	19891105	28	-	.	Name=DARACWW_1:19891095-19891108(-)+;Alias=MEME-1;ID=DARACWW-MEME-1-1-1:19891095-19891108(-);pvalue=0.00159;qvalue=0.0732;sequence=GAAACAT;
1	fimo	nucleotide_motif	19891149	19891155	23.3	-	.	Name=DARACWW_1:19891143-19891159(-)+;Alias=MEME-1;ID=DARACWW-MEME-1-1-1:19891143-19891159(-);pvalue=0.00471;qvalue=0.0905;sequence=TAAACAC;
1	fimo	nucleotide_motif	19926500	19926506	23.3	+	.	Name=DARACWW_1:19926494-19926507(+)+;Alias=MEME-1;ID=DARACWW-MEME-1-1-1:19926494-19926507(+);pvalue=0.00471;qvalue=0.0905;sequence=TAAACAC;
1	fimo	nucleotide_motif	19984851	19984857	22.5	-	.	Name=DARACWW_1:19984847-19984860(-)+;Alias=MEME-1;ID=DARACWW-MEME-1-1-1:19984847-19984860(-);pvalue=0.00567;qvalue=0.0952;sequence=GAAACCT;
1	fimo	nucleotide_motif	19990958	19990964	28	+	.	Name=DARACWW_1:19990952-19990965(+)+;Alias=MEME-1;ID=DARACWW-MEME-1-1-1:19990952-19990965(+);pvalue=0.00159;qvalue=0.0732;sequence=GAAACAT;
1	fimo	nucleotide_motif	19991470	19991476	26	-	.	Name=DARACWW_1:19991467-19991480(-)+;Alias=MEME-1;ID=DARACWW-MEME-1-1-1:19991467-19991480(-);pvalue=0.00252;qvalue=0.0778;sequence=AAAACTC;
1	fimo	nucleotide_motif	19991533	19991539	26	-	.	Name=DARACWW_1:19991531-19991546(-)+;Alias=MEME-1;ID=DARACWW-MEME-1-1-1:19991531-19991546(-);pvalue=0.00252;qvalue=0.0778;sequence=AAAACTC;
1	fimo	nucleotide_motif	20038190	20038196	35	+	.	Name=DARACWW_1:20038184-20038198(+)+;Alias=MEME-1;ID=DARACWW-MEME-1-1-1:20038184-20038198(+);pvalue=0.000319;qvalue=0.0508;sequence=TAAACTT;
1	fimo	nucleotide_motif	20065874	20065880	22.7	-	.	Name=DARACWW_1:20065870-20065883(-)+;Alias=MEME-1;ID=DARACWW-MEME-1-1-1:20065870-20065883(-);pvalue=0.00537;qvalue=0.0935;sequence=GAAACAC;
1	fimo	nucleotide_motif	20103974	20103980	22.5	-	.	Name=DARACWW_1:20103970-20103983(-)+;Alias=MEME-1;ID=DARACWW-MEME-1-1-1:20103970-20103983(-);pvalue=0.00567;qvalue=0.0952;sequence=GTGACTT;
1	fimo	nucleotide_motif	20136867	20136873	26	+	.	Name=DARACWW_1:20136863-20136878(+)+;Alias=MEME-1;ID=DARACWW-MEME-1-1-1:20136863-20136878(+);pvalue=0.00252;qvalue=0.0778;sequence=AAAACTC;
1	fimo	nucleotide_motif	20183700	20183706	24.9	-	.	Name=DARACWW_1:20183693-20183706(-)+;Alias=MEME-1;ID=DARACWW-MEME-1-1-1:20183693-20183706(-);pvalue=0.00323;qvalue=0.0822;sequence=AAGACAA;
1	fimo	nucleotide_motif	20183832	20183838	24.9	-	.	Name=DARACWW_1:20183828-20183841(-)+;Alias=MEME-1;ID=DARACWW-MEME-1-1-1:20183828-20183841(-);pvalue=0.00323;qvalue=0.0822;sequence=TAGACCT;
1	fimo	nucleotide_motif	20191844	20191850	22.5	+	.	Name=DARACWW_1:20191840-20191853(+)+;Alias=MEME-1;ID=DARACWW-MEME-1-1-1:20191840-20191853(+);pvalue=0.00567;qvalue=0.0952;sequence=GTGACTT;
1	fimo	nucleotide_motif	20195341	20195347	23	-	.	Name=DARACWW_1:20195335-20195348(-)+;Alias=MEME-1;ID=DARACWW-MEME-1-1-1:20195335-20195348(-);pvalue=0.00506;qvalue=0.0905;sequence=TTGACTT;
1	fimo	nucleotide_motif	20242413	20242419	27.7	+	.	Name=DARACWW_1:20242406-20242419(+)+;Alias=MEME-1;ID=DARACWW-MEME-1-1-1:20242406-20242419(+);pvalue=0.0017;qvalue=0.0732;sequence=AAAACAT;
1	fimo	nucleotide_motif	20242456	20242462	23.7	+	.	Name=DARACWW_1:20242450-20242463(+)+;Alias=MEME-1;ID=DARACWW-MEME-1-1-1:20242450-20242463(+);pvalue=0.00431;qvalue=0.0905;sequence=TAAACAA;
1	fimo	nucleotide_motif	20290308	20290314	28	+	.	Name=DARACWW_1:20290302-20290315(+)+;Alias=MEME-1;ID=DARACWW-MEME-1-1-1:20290302-20290315(+);pvalue=0.00159;qvalue=0.0732;sequence=GAAACAT;
1	fimo	nucleotide_motif	20290319	20290325	28	+	.	Name=DARACWW_1:20290313-20290326(+)+;Alias=MEME-1;ID=DARACWW-MEME-1-1-1:20290313-20290326(+);pvalue=0.00159;qvalue=0.0732;sequence=GAAACAT;
1	fimo	nucleotide_motif	20356791	20356797	25.5	+	.	Name=DARACWW_1:20356787-20356800(+)+;Alias=MEME-1;ID=DARACWW-MEME-1-1-1:20356787-20356800(+);pvalue=0.00281;qvalue=0.0801;sequence=TGGACAT;
1	fimo	nucleotide_motif	20365944	20365950	22.5	+	.	Name=DARACWW_1:20365938-20365951(+)+;Alias=MEME-1;ID=DARACWW-MEME-1-1-1:20365938-20365951(+);pvalue=0.00567;qvalue=0.0952;sequence=AAAACAC;
1	fimo	nucleotide_motif	20390864	20390870	21.9	+	.	Name=DARACWW_1:20390857-20390870(+)+;Alias=MEME-1;ID=DARACWW-MEME-1-1-1:20390857-20390870(+);pvalue=0.00652;qvalue=0.0978;sequence=AAGATTT;
1	fimo	nucleotide_motif	20390927	20390933	27.7	+	.	Name=DARACWW_1:20390920-20390933(+)+;Alias=MEME-1;ID=DARACWW-MEME-1-1-1:20390920-20390933(+);pvalue=0.0017;qvalue=0.0732;sequence=AAAACAT;
1	fimo	nucleotide_motif	20390965	20390971	34	+	.	Name=DARACWW_1:20390963-20390976(+)+;Alias=MEME-1;ID=DARACWW-MEME-1-1-1:20390963-20390976(+);pvalue=0.0004;qvalue=0.0508;sequence=GAAACTT;
1	fimo	nucleotide_motif	20393850	20393856	41.1	-	.	Name=DARACWW_1:20393848-20393861(-)+;Alias=MEME-1;ID=DARACWW-MEME-1-1-1:20393848-20393861(-);pvalue=7.71e-05;qvalue=0.0467;sequence=TAGACTT;
1	fimo	nucleotide_motif	20401431	20401437	23.6	-	.	Name=DARACWW_1:20401427-20401441(-)+;Alias=MEME-1;ID=DARACWW-MEME-1-1-1:20401427-20401441(-);pvalue=0.00439;qvalue=0.0905;sequence=CAAACAT;
1	fimo	nucleotide_motif	20401540	20401546	21.9	-	.	Name=DARACWW_1:20401535-20401548(-)+;Alias=MEME-1;ID=DARACWW-MEME-1-1-1:20401535-20401548(-);pvalue=0.00642;qvalue=0.0978;sequence=GAGATTT;
1	fimo	nucleotide_motif	20414528	20414534	23	-	.	Name=DARACWW_1:20414525-20414538(-)+;Alias=MEME-1;ID=DARACWW-MEME-1-1-1:20414525-20414538(-);pvalue=0.00506;qvalue=0.0905;sequence=AAAACTG;
1	fimo	nucleotide_motif	20440959	20440965	26.7	+	.	Name=DARACWW_1:20440953-20440966(+)+;Alias=MEME-1;ID=DARACWW-MEME-1-1-1:20440953-20440966(+);pvalue=0.00212;qvalue=0.0766;sequence=TAAACTC;
1	fimo	nucleotide_motif	20440998	20441004	26.2	+	.	Name=DARACWW_1:20440991-20441004(+)+;Alias=MEME-1;ID=DARACWW-MEME-1-1-1:20440991-20441004(+);pvalue=0.00237;qvalue=0.0778;sequence=AGAACTT;
1	fimo	nucleotide_motif	20558355	20558361	25.7	+	.	Name=DARACWW_1:20558349-20558362(+)+;Alias=MEME-1;ID=DARACWW-MEME-1-1-1:20558349-20558362(+);pvalue=0.00267;qvalue=0.0794;sequence=TAGACTG;
1	fimo	nucleotide_motif	20653953	20653959	38.4	-	.	Name=DARACWW_1:20653949-20653962(-)+;Alias=MEME-1;ID=DARACWW-MEME-1-1-1:20653949-20653962(-);pvalue=0.000143;qvalue=0.0467;sequence=GAGACTT;
1	fimo	nucleotide_motif	20666249	20666255	23.7	-	.	Name=DARACWW_1:20666245-20666258(-)+;Alias=MEME-1;ID=DARACWW-MEME-1-1-1:20666245-20666258(-);pvalue=0.00431;qvalue=0.0905;sequence=TAAACAA;
1	fimo	nucleotide_motif	20715633	20715639	23.3	-	.	Name=DARACWW_1:20715629-20715642(-)+;Alias=MEME-1;ID=DARACWW-MEME-1-1-1:20715629-20715642(-);pvalue=0.00471;qvalue=0.0905;sequence=GAAACTG;
1	fimo	nucleotide_motif	20802753	20802759	36.5	-	.	Name=DARACWW_1:20802749-20802762(-)+;Alias=MEME-1;ID=DARACWW-MEME-1-1-1:20802749-20802762(-);pvalue=0.000224;qvalue=0.0467;sequence=AAGACTT;
1	fimo	nucleotide_motif	20802825	20802831	23	-	.	Name=DARACWW_1:20802821-20802835(-)+;Alias=MEME-1;ID=DARACWW-MEME-1-1-1:20802821-20802835(-);pvalue=0.00506;qvalue=0.0905;sequence=TTGACTT;
1	fimo	nucleotide_motif	20803722	20803728	24.2	-	.	Name=DARACWW_1:20803720-20803734(-)+;Alias=MEME-1;ID=DARACWW-MEME-1-1-1:20803720-20803734(-);pvalue=0.00379;qvalue=0.0872;sequence=AAGACCT;
1	fimo	nucleotide_motif	20804699	20804705	25.2	-	.	Name=DARACWW_1:20804693-20804706(-)+;Alias=MEME-1;ID=DARACWW-MEME-1-1-1:20804693-20804706(-);pvalue=0.003;qvalue=0.0822;sequence=GAGACAA;
1	fimo	nucleotide_motif	20804882	20804888	26.7	-	.	Name=DARACWW_1:20804879-20804892(-)+;Alias=MEME-1;ID=DARACWW-MEME-1-1-1:20804879-20804892(-);pvalue=0.00212;qvalue=0.0766;sequence=TAAACTC;
1	fimo	nucleotide_motif	20808289	20808295	23.7	-	.	Name=DARACWW_1:20808285-20808298(-)+;Alias=MEME-1;ID=DARACWW-MEME-1-1-1:20808285-20808298(-);pvalue=0.00431;qvalue=0.0905;sequence=TAAACAA;
1	fimo	nucleotide_motif	20876225	20876231	21.7	+	.	Name=DARACWW_1:20876223-20876236(+)+;Alias=MEME-1;ID=DARACWW-MEME-1-1-1:20876223-20876236(+);pvalue=0.00677;qvalue=0.0998;sequence=AGAACTC;
1	fimo	nucleotide_motif	20902682	20902688	36.5	+	.	Name=DARACWW_1:20902675-20902689(+)+;Alias=MEME-1;ID=DARACWW-MEME-1-1-1:20902675-20902689(+);pvalue=0.000224;qvalue=0.0467;sequence=AAGACTT;
1	fimo	nucleotide_motif	20963331	20963337	34	+	.	Name=DARACWW_1:20963325-20963338(+)+;Alias=MEME-1;ID=DARACWW-MEME-1-1-1:20963325-20963338(+);pvalue=0.0004;qvalue=0.0508;sequence=GAAACTT;
1	fimo	nucleotide_motif	20963383	20963389	23.5	+	.	Name=DARACWW_1:20963378-20963391(+)+;Alias=MEME-1;ID=DARACWW-MEME-1-1-1:20963378-20963391(+);pvalue=0.00447;qvalue=0.0905;sequence=TGAACAT;
1	fimo	nucleotide_motif	20963404	20963410	33	+	.	Name=DARACWW_1:20963397-20963411(+)+;Alias=MEME-1;ID=DARACWW-MEME-1-1-1:20963397-20963411(+);pvalue=0.0005;qvalue=0.0508;sequence=AAAACTT;
1	fimo	nucleotide_motif	20968085	20968091	26.2	-	.	Name=DARACWW_1:20968078-20968092(-)+;Alias=MEME-1;ID=DARACWW-MEME-1-1-1:20968078-20968092(-);pvalue=0.00237;qvalue=0.0778;sequence=AGAACTT;
1	fimo	nucleotide_motif	20968136	20968142	36.5	-	.	Name=DARACWW_1:20968130-20968143(-)+;Alias=MEME-1;ID=DARACWW-MEME-1-1-1:20968130-20968143(-);pvalue=0.000224;qvalue=0.0467;sequence=AAGACTT;
1	fimo	nucleotide_motif	21030560	21030566	23.9	+	.	Name=DARACWW_1:21030555-21030569(+)+;Alias=MEME-1;ID=DARACWW-MEME-1-1-1:21030555-21030569(+);pvalue=0.00407;qvalue=0.0905;sequence=GGGACTC;
1	fimo	nucleotide_motif	21031924	21031930	23.7	+	.	Name=DARACWW_1:21031920-21031933(+)+;Alias=MEME-1;ID=DARACWW-MEME-1-1-1:21031920-21031933(+);pvalue=0.00431;qvalue=0.0905;sequence=AGGACTC;
1	fimo	nucleotide_motif	21031986	21031992	24.6	+	.	Name=DARACWW_1:21031980-21031997(+)+;Alias=MEME-1;ID=DARACWW-MEME-1-1-1:21031980-21031997(+);pvalue=0.00348;qvalue=0.0846;sequence=GAGACAC;
1	fimo	nucleotide_motif	21044716	21044722	33	+	.	Name=DARACWW_1:21044714-21044727(+)+;Alias=MEME-1;ID=DARACWW-MEME-1-1-1:21044714-21044727(+);pvalue=0.0005;qvalue=0.0508;sequence=AAAACTT;
1	fimo	nucleotide_motif	21086640	21086646	27.3	-	.	Name=DARACWW_1:21086633-21086647(-)+;Alias=MEME-1;ID=DARACWW-MEME-1-1-1:21086633-21086647(-);pvalue=0.00188;qvalue=0.0756;sequence=CAAACTT;
1	fimo	nucleotide_motif	21086668	21086674	22.9	-	.	Name=DARACWW_1:21086665-21086678(-)+;Alias=MEME-1;ID=DARACWW-MEME-1-1-1:21086665-21086678(-);pvalue=0.00513;qvalue=0.0914;sequence=GGAACAT;
1	fimo	nucleotide_motif	21086721	21086727	36.5	-	.	Name=DARACWW_1:21086717-21086730(-)+;Alias=MEME-1;ID=DARACWW-MEME-1-1-1:21086717-21086730(-);pvalue=0.000224;qvalue=0.0467;sequence=AAGACTT;
1	fimo	nucleotide_motif	21086758	21086764	21.9	-	.	Name=DARACWW_1:21086753-21086766(-)+;Alias=MEME-1;ID=DARACWW-MEME-1-1-1:21086753-21086766(-);pvalue=0.00652;qvalue=0.0978;sequence=AAGATTT;
1	fimo	nucleotide_motif	21089907	21089913	41.1	-	.	Name=DARACWW_1:21089905-21089918(-)+;Alias=MEME-1;ID=DARACWW-MEME-1-1-1:21089905-21089918(-);pvalue=7.71e-05;qvalue=0.0467;sequence=TAGACTT;
1	fimo	nucleotide_motif	21089956	21089962	26.2	-	.	Name=DARACWW_1:21089950-21089963(-)+;Alias=MEME-1;ID=DARACWW-MEME-1-1-1:21089950-21089963(-);pvalue=0.00237;qvalue=0.0778;sequence=AGAACTT;
1	fimo	nucleotide_motif	21090006	21090012	35	-	.	Name=DARACWW_1:21090002-21090017(-)+;Alias=MEME-1;ID=DARACWW-MEME-1-1-1:21090002-21090017(-);pvalue=0.000319;qvalue=0.0508;sequence=TAAACTT;
1	fimo	nucleotide_motif	21144255	21144261	23.3	+	.	Name=DARACWW_1:21144248-21144262(+)+;Alias=MEME-1;ID=DARACWW-MEME-1-1-1:21144248-21144262(+);pvalue=0.00471;qvalue=0.0905;sequence=TAAACAC;
1	fimo	nucleotide_motif	21144286	21144292	35	+	.	Name=DARACWW_1:21144280-21144294(+)+;Alias=MEME-1;ID=DARACWW-MEME-1-1-1:21144280-21144294(+);pvalue=0.000319;qvalue=0.0508;sequence=TAAACTT;
1	fimo	nucleotide_motif	21356440	21356446	29.3	+	.	Name=DARACWW_1:21356433-21356447(+)+;Alias=MEME-1;ID=DARACWW-MEME-1-1-1:21356433-21356447(+);pvalue=0.00116;qvalue=0.0681;sequence=AAGACTA;
1	fimo	nucleotide_motif	21362606	21362612	24.3	-	.	Name=DARACWW_1:21362602-21362615(-)+;Alias=MEME-1;ID=DARACWW-MEME-1-1-1:21362602-21362615(-);pvalue=0.00367;qvalue=0.0857;sequence=AAGACAC;
1	fimo	nucleotide_motif	21380212	21380218	21.9	+	.	Name=DARACWW_1:21380207-21380220(+)+;Alias=MEME-1;ID=DARACWW-MEME-1-1-1:21380207-21380220(+);pvalue=0.00642;qvalue=0.0978;sequence=AGAACTA;
1	fimo	nucleotide_motif	21380306	21380312	22.1	+	.	Name=DARACWW_1:21380304-21380317(+)+;Alias=MEME-1;ID=DARACWW-MEME-1-1-1:21380304-21380317(+);pvalue=0.00612;qvalue=0.0968;sequence=CAAACTC;
1	fimo	nucleotide_motif	21429952	21429958	24.9	-	.	Name=DARACWW_1:21429948-21429961(-)+;Alias=MEME-1;ID=DARACWW-MEME-1-1-1:21429948-21429961(-);pvalue=0.00323;qvalue=0.0822;sequence=AAGACTG;
1	fimo	nucleotide_motif	21504347	21504353	23	-	.	Name=DARACWW_1:21504344-21504357(-)+;Alias=MEME-1;ID=DARACWW-MEME-1-1-1:21504344-21504357(-);pvalue=0.00506;qvalue=0.0905;sequence=AAAACAA;
1	fimo	nucleotide_motif	21623768	21623774	35	-	.	Name=DARACWW_1:21623764-21623777(-)+;Alias=MEME-1;ID=DARACWW-MEME-1-1-1:21623764-21623777(-);pvalue=0.000319;qvalue=0.0508;sequence=TAAACTT;
1	fimo	nucleotide_motif	21623898	21623904	29.7	-	.	Name=DARACWW_1:21623894-21623907(-)+;Alias=MEME-1;ID=DARACWW-MEME-1-1-1:21623894-21623907(-);pvalue=0.00108;qvalue=0.0664;sequence=GAGACTA;
1	fimo	nucleotide_motif	21623966	21623972	22.1	-	.	Name=DARACWW_1:21623960-21623973(-)+;Alias=MEME-1;ID=DARACWW-MEME-1-1-1:21623960-21623973(-);pvalue=0.00612;qvalue=0.0968;sequence=CAAACTC;
1	fimo	nucleotide_motif	21680367	21680373	27.4	+	.	Name=DARACWW_1:21680361-21680375(+)+;Alias=MEME-1;ID=DARACWW-MEME-1-1-1:21680361-21680375(+);pvalue=0.0018;qvalue=0.0746;sequence=TAAACTA;
1	fimo	nucleotide_motif	21885960	21885966	33	+	.	Name=DARACWW_1:21885959-21885972(+)+;Alias=MEME-1;ID=DARACWW-MEME-1-1-1:21885959-21885972(+);pvalue=0.0005;qvalue=0.0508;sequence=AAAACTT;
1	fimo	nucleotide_motif	21900821	21900827	22.5	+	.	Name=DARACWW_1:21900815-21900828(+)+;Alias=MEME-1;ID=DARACWW-MEME-1-1-1:21900815-21900828(+);pvalue=0.00567;qvalue=0.0952;sequence=AAAACAC;
1	fimo	nucleotide_motif	21900874	21900880	24	+	.	Name=DARACWW_1:21900869-21900883(+)+;Alias=MEME-1;ID=DARACWW-MEME-1-1-1:21900869-21900883(+);pvalue=0.00395;qvalue=0.0888;sequence=GGGACTA;
1	fimo	nucleotide_motif	21900977	21900983	24.6	+	.	Name=DARACWW_1:21900975-21900988(+)+;Alias=MEME-1;ID=DARACWW-MEME-1-1-1:21900975-21900988(+);pvalue=0.00348;qvalue=0.0846;sequence=GAGACAC;
1	fimo	nucleotide_motif	21984264	21984270	25.7	+	.	Name=DARACWW_1:21984258-21984271(+)+;Alias=MEME-1;ID=DARACWW-MEME-1-1-1:21984258-21984271(+);pvalue=0.00267;qvalue=0.0794;sequence=TAGACAA;
1	fimo	nucleotide_motif	22053804	22053810	23.6	+	.	Name=DARACWW_1:22053798-22053811(+)+;Alias=MEME-1;ID=DARACWW-MEME-1-1-1:22053798-22053811(+);pvalue=0.00439;qvalue=0.0905;sequence=CAAACAT;
1	fimo	nucleotide_motif	22053816	22053822	23.3	+	.	Name=DARACWW_1:22053810-22053823(+)+;Alias=MEME-1;ID=DARACWW-MEME-1-1-1:22053810-22053823(+);pvalue=0.00471;qvalue=0.0905;sequence=GAAACAA;
1	fimo	nucleotide_motif	22095480	22095486	21.9	-	.	Name=DARACWW_1:22095476-22095489(-)+;Alias=MEME-1;ID=DARACWW-MEME-1-1-1:22095476-22095489(-);pvalue=0.00642;qvalue=0.0978;sequence=AGAACTA;
1	fimo	nucleotide_motif	22142871	22142877	23	-	.	Name=DARACWW_1:22142867-22142880(-)+;Alias=MEME-1;ID=DARACWW-MEME-1-1-1:22142867-22142880(-);pvalue=0.00506;qvalue=0.0905;sequence=AAAACAA;
1	fimo	nucleotide_motif	22142877	22142883	30.9	-	.	Name=DARACWW_1:22142875-22142888(-)+;Alias=MEME-1;ID=DARACWW-MEME-1-1-1:22142875-22142888(-);pvalue=0.000818;qvalue=0.0606;sequence=TAGACTA;
1	fimo	nucleotide_motif	22195302	22195308	25.2	+	.	Name=DARACWW_1:22195298-22195311(+)+;Alias=MEME-1;ID=DARACWW-MEME-1-1-1:22195298-22195311(+);pvalue=0.003;qvalue=0.0822;sequence=GAGACAA;
1	fimo	nucleotide_motif	22264351	22264357	24.2	+	.	Name=DARACWW_1:22264344-22264358(+)+;Alias=MEME-1;ID=DARACWW-MEME-1-1-1:22264344-22264358(+);pvalue=0.00379;qvalue=0.0872;sequence=AAGACCT;
1	fimo	nucleotide_motif	22264364	22264370	26.7	+	.	Name=DARACWW_1:22264358-22264371(+)+;Alias=MEME-1;ID=DARACWW-MEME-1-1-1:22264358-22264371(+);pvalue=0.00212;qvalue=0.0766;sequence=TAAACTC;
1	fimo	nucleotide_motif	22354846	22354852	22.1	-	.	Name=DARACWW_1:22354840-22354855(-)+;Alias=MEME-1;ID=DARACWW-MEME-1-1-1:22354840-22354855(-);pvalue=0.00612;qvalue=0.0968;sequence=CAAACTC;
1	fimo	nucleotide_motif	22369028	22369034	25.7	-	.	Name=DARACWW_1:22369026-22369039(-)+;Alias=MEME-1;ID=DARACWW-MEME-1-1-1:22369026-22369039(-);pvalue=0.00267;qvalue=0.0794;sequence=TAGACTG;
1	fimo	nucleotide_motif	22369166	22369172	28	-	.	Name=DARACWW_1:22369162-22369175(-)+;Alias=MEME-1;ID=DARACWW-MEME-1-1-1:22369162-22369175(-);pvalue=0.00159;qvalue=0.0732;sequence=GAAACAT;
1	fimo	nucleotide_motif	22445095	22445101	26.5	+	.	Name=DARACWW_1:22445088-22445101(+)+;Alias=MEME-1;ID=DARACWW-MEME-1-1-1:22445088-22445101(+);pvalue=0.00222;qvalue=0.0769;sequence=AAAACTA;
1	fimo	nucleotide_motif	22508633	22508639	24.3	-	.	Name=DARACWW_1:22508629-22508642(-)+;Alias=MEME-1;ID=DARACWW-MEME-1-1-1:22508629-22508642(-);pvalue=0.00367;qvalue=0.0857;sequence=AAGACAC;
1	fimo	nucleotide_motif	22560648	22560654	24.7	+	.	Name=DARACWW_1:22560642-22560655(+)+;Alias=MEME-1;ID=DARACWW-MEME-1-1-1:22560642-22560655(+);pvalue=0.00342;qvalue=0.0846;sequence=CAGACTA;
1	fimo	nucleotide_motif	22588761	22588767	23.7	+	.	Name=DARACWW_1:22588755-22588768(+)+;Alias=MEME-1;ID=DARACWW-MEME-1-1-1:22588755-22588768(+);pvalue=0.00431;qvalue=0.0905;sequence=TAAACAA;
1	fimo	nucleotide_motif	22588775	22588781	21.9	+	.	Name=DARACWW_1:22588772-22588785(+)+;Alias=MEME-1;ID=DARACWW-MEME-1-1-1:22588772-22588785(+);pvalue=0.00652;qvalue=0.0978;sequence=AAGATTT;
1	fimo	nucleotide_motif	22812420	22812426	24.6	+	.	Name=DARACWW_1:22812416-22812429(+)+;Alias=MEME-1;ID=DARACWW-MEME-1-1-1:22812416-22812429(+);pvalue=0.00348;qvalue=0.0846;sequence=GAGACAC;
1	fimo	nucleotide_motif	22815583	22815589	26	+	.	Name=DARACWW_1:22815579-22815594(+)+;Alias=MEME-1;ID=DARACWW-MEME-1-1-1:22815579-22815594(+);pvalue=0.00252;qvalue=0.0778;sequence=AAAACTC;
1	fimo	nucleotide_motif	22882247	22882253	25.7	-	.	Name=DARACWW_1:22882245-22882258(-)+;Alias=MEME-1;ID=DARACWW-MEME-1-1-1:22882245-22882258(-);pvalue=0.00267;qvalue=0.0794;sequence=TAGACTG;
1	fimo	nucleotide_motif	22882315	22882321	22.2	-	.	Name=DARACWW_1:22882311-22882325(-)+;Alias=MEME-1;ID=DARACWW-MEME-1-1-1:22882311-22882325(-);pvalue=0.00599;qvalue=0.0965;sequence=AAAACCT;
1	fimo	nucleotide_motif	22975628	22975634	29.7	-	.	Name=DARACWW_1:22975624-22975637(-)+;Alias=MEME-1;ID=DARACWW-MEME-1-1-1:22975624-22975637(-);pvalue=0.00108;qvalue=0.0664;sequence=TAGACTC;
1	fimo	nucleotide_motif	22995497	22995503	21.9	-	.	Name=DARACWW_1:22995493-22995506(-)+;Alias=MEME-1;ID=DARACWW-MEME-1-1-1:22995493-22995506(-);pvalue=0.00642;qvalue=0.0978;sequence=AGAACTA;
1	fimo	nucleotide_motif	23084414	23084420	26.7	-	.	Name=DARACWW_1:23084409-23084423(-)+;Alias=MEME-1;ID=DARACWW-MEME-1-1-1:23084409-23084423(-);pvalue=0.00212;qvalue=0.0766;sequence=TAAACTC;
1	fimo	nucleotide_motif	23106179	23106185	25.2	-	.	Name=DARACWW_1:23106175-23106188(-)+;Alias=MEME-1;ID=DARACWW-MEME-1-1-1:23106175-23106188(-);pvalue=0.003;qvalue=0.0822;sequence=GAGACAA;
1	fimo	nucleotide_motif	23233389	23233395	31.3	+	.	Name=DARACWW_1:23233383-23233396(+)+;Alias=MEME-1;ID=DARACWW-MEME-1-1-1:23233383-23233396(+);pvalue=0.000737;qvalue=0.0566;sequence=AAGACAT;
1	fimo	nucleotide_motif	23233533	23233539	24.9	-	.	Name=DARACWW_1:23233529-23233545(-)+;Alias=MEME-1;ID=DARACWW-MEME-1-1-1:23233529-23233545(-);pvalue=0.00323;qvalue=0.0822;sequence=AAGACAA;
1	fimo	nucleotide_motif	23233560	23233566	32.3	-	.	Name=DARACWW_1:23233556-23233569(-)+;Alias=MEME-1;ID=DARACWW-MEME-1-1-1:23233556-23233569(-);pvalue=0.000582;qvalue=0.0548;sequence=TAGACAT;
1	fimo	nucleotide_motif	23233590	23233596	33	-	.	Name=DARACWW_1:23233583-23233602(-)+;Alias=MEME-1;ID=DARACWW-MEME-1-1-1:23233583-23233602(-);pvalue=0.0005;qvalue=0.0508;sequence=AAAACTT;
1	fimo	nucleotide_motif	23233598	23233604	32.3	-	.	Name=DARACWW_1:23233594-23233607(-)+;Alias=MEME-1;ID=DARACWW-MEME-1-1-1:23233594-23233607(-);pvalue=0.000582;qvalue=0.0548;sequence=TAGACAT;
1	fimo	nucleotide_motif	23344047	23344053	35	+	.	Name=DARACWW_1:23344041-23344054(+)+;Alias=MEME-1;ID=DARACWW-MEME-1-1-1:23344041-23344054(+);pvalue=0.000319;qvalue=0.0508;sequence=TAAACTT;
1	fimo	nucleotide_motif	23558668	23558674	29.7	+	.	Name=DARACWW_1:23558662-23558675(+)+;Alias=MEME-1;ID=DARACWW-MEME-1-1-1:23558662-23558675(+);pvalue=0.00108;qvalue=0.0664;sequence=TAGACTC;
1	fimo	nucleotide_motif	23558766	23558772	23	+	.	Name=DARACWW_1:23558758-23558772(+)+;Alias=MEME-1;ID=DARACWW-MEME-1-1-1:23558758-23558772(+);pvalue=0.00506;qvalue=0.0905;sequence=AAAACTG;
1	fimo	nucleotide_motif	23622318	23622324	25.7	+	.	Name=DARACWW_1:23622314-23622327(+)+;Alias=MEME-1;ID=DARACWW-MEME-1-1-1:23622314-23622327(+);pvalue=0.00267;qvalue=0.0794;sequence=TAGACAA;
1	fimo	nucleotide_motif	23624739	23624745	26.7	-	.	Name=DARACWW_1:23624735-23624748(-)+;Alias=MEME-1;ID=DARACWW-MEME-1-1-1:23624735-23624748(-);pvalue=0.00212;qvalue=0.0766;sequence=TAAACTC;
1	fimo	nucleotide_motif	23657761	23657767	24.3	-	.	Name=DARACWW_1:23657757-23657770(-)+;Alias=MEME-1;ID=DARACWW-MEME-1-1-1:23657757-23657770(-);pvalue=0.00367;qvalue=0.0857;sequence=AAGACAC;
1	fimo	nucleotide_motif	23657784	23657790	24.6	-	.	Name=DARACWW_1:23657778-23657791(-)+;Alias=MEME-1;ID=DARACWW-MEME-1-1-1:23657778-23657791(-);pvalue=0.00348;qvalue=0.0846;sequence=GAGACAC;
1	fimo	nucleotide_motif	23719222	23719228	28	+	.	Name=DARACWW_1:23719216-23719229(+)+;Alias=MEME-1;ID=DARACWW-MEME-1-1-1:23719216-23719229(+);pvalue=0.00159;qvalue=0.0732;sequence=GAAACAT;
1	fimo	nucleotide_motif	23738858	23738864	27.7	-	.	Name=DARACWW_1:23738849-23738864(-)+;Alias=MEME-1;ID=DARACWW-MEME-1-1-1:23738849-23738864(-);pvalue=0.0017;qvalue=0.0732;sequence=AAAACAT;
1	fimo	nucleotide_motif	23743147	23743153	23.7	+	.	Name=DARACWW_1:23743141-23743154(+)+;Alias=MEME-1;ID=DARACWW-MEME-1-1-1:23743141-23743154(+);pvalue=0.00431;qvalue=0.0905;sequence=TAAACAA;
1	fimo	nucleotide_motif	23758385	23758391	27.7	-	.	Name=DARACWW_1:23758381-23758394(-)+;Alias=MEME-1;ID=DARACWW-MEME-1-1-1:23758381-23758394(-);pvalue=0.0017;qvalue=0.0732;sequence=AAAACAT;
1	fimo	nucleotide_motif	23758571	23758577	24.3	-	.	Name=DARACWW_1:23758569-23758583(-)+;Alias=MEME-1;ID=DARACWW-MEME-1-1-1:23758569-23758583(-);pvalue=0.00367;qvalue=0.0857;sequence=AAGACAC;
1	fimo	nucleotide_motif	23765886	23765892	29.3	+	.	Name=DARACWW_1:23765882-23765895(+)+;Alias=MEME-1;ID=DARACWW-MEME-1-1-1:23765882-23765895(+);pvalue=0.00116;qvalue=0.0681;sequence=AAGACTA;
1	fimo	nucleotide_motif	23835245	23835251	24.1	+	.	Name=DARACWW_1:23835239-23835252(+)+;Alias=MEME-1;ID=DARACWW-MEME-1-1-1:23835239-23835252(+);pvalue=0.00384;qvalue=0.0872;sequence=CAGACTC;
1	fimo	nucleotide_motif	23835283	23835289	28.9	+	.	Name=DARACWW_1:23835279-23835292(+)+;Alias=MEME-1;ID=DARACWW-MEME-1-1-1:23835279-23835292(+);pvalue=0.00128;qvalue=0.0722;sequence=AGGACTT;
1	fimo	nucleotide_motif	23835351	23835357	22.5	+	.	Name=DARACWW_1:23835347-23835360(+)+;Alias=MEME-1;ID=DARACWW-MEME-1-1-1:23835347-23835360(+);pvalue=0.00567;qvalue=0.0952;sequence=GAAACCT;
1	fimo	nucleotide_motif	23883162	23883168	29.3	+	.	Name=DARACWW_1:23883156-23883169(+)+;Alias=MEME-1;ID=DARACWW-MEME-1-1-1:23883156-23883169(+);pvalue=0.00116;qvalue=0.0681;sequence=AAGACTA;
1	fimo	nucleotide_motif	23902055	23902061	41.1	+	.	Name=DARACWW_1:23902049-23902062(+)+;Alias=MEME-1;ID=DARACWW-MEME-1-1-1:23902049-23902062(+);pvalue=7.71e-05;qvalue=0.0467;sequence=TAGACTT;
1	fimo	nucleotide_motif	23902066	23902072	41.1	+	.	Name=DARACWW_1:23902060-23902073(+)+;Alias=MEME-1;ID=DARACWW-MEME-1-1-1:23902060-23902073(+);pvalue=7.71e-05;qvalue=0.0467;sequence=TAGACTT;
1	fimo	nucleotide_motif	23954858	23954864	26.1	-	.	Name=DARACWW_1:23954852-23954865(-)+;Alias=MEME-1;ID=DARACWW-MEME-1-1-1:23954852-23954865(-);pvalue=0.00244;qvalue=0.0778;sequence=GAAACTC;
1	fimo	nucleotide_motif	23973492	23973498	26.7	+	.	Name=DARACWW_1:23973486-23973499(+)+;Alias=MEME-1;ID=DARACWW-MEME-1-1-1:23973486-23973499(+);pvalue=0.00212;qvalue=0.0766;sequence=GAAACTA;
1	fimo	nucleotide_motif	24037159	24037165	21.8	+	.	Name=DARACWW_1:24037151-24037166(+)+;Alias=MEME-1;ID=DARACWW-MEME-1-1-1:24037151-24037166(+);pvalue=0.00665;qvalue=0.0986;sequence=AAGACAG;
1	fimo	nucleotide_motif	24046825	24046831	29.3	-	.	Name=DARACWW_1:24046821-24046834(-)+;Alias=MEME-1;ID=DARACWW-MEME-1-1-1:24046821-24046834(-);pvalue=0.00116;qvalue=0.0681;sequence=AAGACTA;
1	fimo	nucleotide_motif	24100874	24100880	23.7	+	.	Name=DARACWW_1:24100868-24100882(+)+;Alias=MEME-1;ID=DARACWW-MEME-1-1-1:24100868-24100882(+);pvalue=0.00431;qvalue=0.0905;sequence=TAAACTG;
1	fimo	nucleotide_motif	24100887	24100893	23.3	+	.	Name=DARACWW_1:24100881-24100894(+)+;Alias=MEME-1;ID=DARACWW-MEME-1-1-1:24100881-24100894(+);pvalue=0.00471;qvalue=0.0905;sequence=GAAACAA;
1	fimo	nucleotide_motif	24100894	24100900	21.8	+	.	Name=DARACWW_1:24100889-24100902(+)+;Alias=MEME-1;ID=DARACWW-MEME-1-1-1:24100889-24100902(+);pvalue=0.00658;qvalue=0.0983;sequence=GAGACAG;
1	fimo	nucleotide_motif	24134303	24134309	29.3	-	.	Name=DARACWW_1:24134301-24134314(-)+;Alias=MEME-1;ID=DARACWW-MEME-1-1-1:24134301-24134314(-);pvalue=0.00116;qvalue=0.0681;sequence=AAGACTA;
1	fimo	nucleotide_motif	24154144	24154150	25.2	+	.	Name=DARACWW_1:24154140-24154153(+)+;Alias=MEME-1;ID=DARACWW-MEME-1-1-1:24154140-24154153(+);pvalue=0.003;qvalue=0.0822;sequence=TAGACAC;
1	fimo	nucleotide_motif	24158609	24158615	28.2	+	.	Name=DARACWW_1:24158603-24158616(+)+;Alias=MEME-1;ID=DARACWW-MEME-1-1-1:24158603-24158616(+);pvalue=0.00151;qvalue=0.0732;sequence=TAAACAT;
1	fimo	nucleotide_motif	24215885	24215891	27.7	-	.	Name=DARACWW_1:24215882-24215895(-)+;Alias=MEME-1;ID=DARACWW-MEME-1-1-1:24215882-24215895(-);pvalue=0.0017;qvalue=0.0732;sequence=AAAACAT;
1	fimo	nucleotide_motif	24228851	24228857	24.9	+	.	Name=DARACWW_1:24228845-24228858(+)+;Alias=MEME-1;ID=DARACWW-MEME-1-1-1:24228845-24228858(+);pvalue=0.00323;qvalue=0.0822;sequence=AAGACAA;
1	fimo	nucleotide_motif	24228903	24228909	22.5	+	.	Name=DARACWW_1:24228899-24228912(+)+;Alias=MEME-1;ID=DARACWW-MEME-1-1-1:24228899-24228912(+);pvalue=0.00567;qvalue=0.0952;sequence=GTGACTT;
1	fimo	nucleotide_motif	24230878	24230884	29.3	+	.	Name=DARACWW_1:24230872-24230885(+)+;Alias=MEME-1;ID=DARACWW-MEME-1-1-1:24230872-24230885(+);pvalue=0.00116;qvalue=0.0681;sequence=AAGACTA;
1	fimo	nucleotide_motif	24240477	24240483	27.4	+	.	Name=DARACWW_1:24240471-24240485(+)+;Alias=MEME-1;ID=DARACWW-MEME-1-1-1:24240471-24240485(+);pvalue=0.0018;qvalue=0.0746;sequence=TAAACTA;
1	fimo	nucleotide_motif	24240500	24240506	24.3	+	.	Name=DARACWW_1:24240492-24240507(+)+;Alias=MEME-1;ID=DARACWW-MEME-1-1-1:24240492-24240507(+);pvalue=0.00367;qvalue=0.0857;sequence=AAGACAC;
1	fimo	nucleotide_motif	24297446	24297452	23.3	+	.	Name=DARACWW_1:24297440-24297453(+)+;Alias=MEME-1;ID=DARACWW-MEME-1-1-1:24297440-24297453(+);pvalue=0.00471;qvalue=0.0905;sequence=TAAACAC;
1	fimo	nucleotide_motif	24297495	24297501	21.9	+	.	Name=DARACWW_1:24297492-24297505(+)+;Alias=MEME-1;ID=DARACWW-MEME-1-1-1:24297492-24297505(+);pvalue=0.00642;qvalue=0.0978;sequence=GAGATTT;
1	fimo	nucleotide_motif	24299546	24299552	33	+	.	Name=DARACWW_1:24299539-24299552(+)+;Alias=MEME-1;ID=DARACWW-MEME-1-1-1:24299539-24299552(+);pvalue=0.0005;qvalue=0.0508;sequence=AAAACTT;
1	fimo	nucleotide_motif	24299555	24299561	25.2	+	.	Name=DARACWW_1:24299553-24299566(+)+;Alias=MEME-1;ID=DARACWW-MEME-1-1-1:24299553-24299566(+);pvalue=0.003;qvalue=0.0822;sequence=GAGACAA;
1	fimo	nucleotide_motif	24306879	24306885	31.3	-	.	Name=DARACWW_1:24306877-24306890(-)+;Alias=MEME-1;ID=DARACWW-MEME-1-1-1:24306877-24306890(-);pvalue=0.000737;qvalue=0.0566;sequence=AAGACAT;
1	fimo	nucleotide_motif	24418248	24418254	23.3	-	.	Name=DARACWW_1:24418244-24418257(-)+;Alias=MEME-1;ID=DARACWW-MEME-1-1-1:24418244-24418257(-);pvalue=0.00471;qvalue=0.0905;sequence=GAAACAA;
1	fimo	nucleotide_motif	24434408	24434414	23	-	.	Name=DARACWW_1:24434405-24434418(-)+;Alias=MEME-1;ID=DARACWW-MEME-1-1-1:24434405-24434418(-);pvalue=0.00506;qvalue=0.0905;sequence=AAAACAA;
1	fimo	nucleotide_motif	24440362	24440368	35	-	.	Name=DARACWW_1:24440354-24440369(-)+;Alias=MEME-1;ID=DARACWW-MEME-1-1-1:24440354-24440369(-);pvalue=0.000319;qvalue=0.0508;sequence=TAAACTT;
1	fimo	nucleotide_motif	24541948	24541954	35	+	.	Name=DARACWW_1:24541943-24541956(+)+;Alias=MEME-1;ID=DARACWW-MEME-1-1-1:24541943-24541956(+);pvalue=0.000319;qvalue=0.0508;sequence=TAAACTT;
1	fimo	nucleotide_motif	24557296	24557302	28.9	+	.	Name=DARACWW_1:24557291-24557305(+)+;Alias=MEME-1;ID=DARACWW-MEME-1-1-1:24557291-24557305(+);pvalue=0.00128;qvalue=0.0722;sequence=AGGACTT;
1	fimo	nucleotide_motif	24557367	24557373	26.1	+	.	Name=DARACWW_1:24557364-24557378(+)+;Alias=MEME-1;ID=DARACWW-MEME-1-1-1:24557364-24557378(+);pvalue=0.00244;qvalue=0.0778;sequence=GAAACTC;
1	fimo	nucleotide_motif	24559412	24559418	22.5	-	.	Name=DARACWW_1:24559408-24559421(-)+;Alias=MEME-1;ID=DARACWW-MEME-1-1-1:24559408-24559421(-);pvalue=0.00567;qvalue=0.0952;sequence=GTGACTT;
1	fimo	nucleotide_motif	24559449	24559455	25.6	-	.	Name=DARACWW_1:24559445-24559458(-)+;Alias=MEME-1;ID=DARACWW-MEME-1-1-1:24559445-24559458(-);pvalue=0.00274;qvalue=0.0794;sequence=CAGACAT;
1	fimo	nucleotide_motif	24596112	24596118	22.7	-	.	Name=DARACWW_1:24596108-24596121(-)+;Alias=MEME-1;ID=DARACWW-MEME-1-1-1:24596108-24596121(-);pvalue=0.00537;qvalue=0.0935;sequence=GAAACAC;
1	fimo	nucleotide_motif	24655300	24655306	22.5	-	.	Name=DARACWW_1:24655296-24655309(-)+;Alias=MEME-1;ID=DARACWW-MEME-1-1-1:24655296-24655309(-);pvalue=0.00567;qvalue=0.0952;sequence=GAAACCT;
1	fimo	nucleotide_motif	24686336	24686342	22	-	.	Name=DARACWW_1:24686331-24686346(-)+;Alias=MEME-1;ID=DARACWW-MEME-1-1-1:24686331-24686346(-);pvalue=0.00626;qvalue=0.0978;sequence=GGAACTA;
1	fimo	nucleotide_motif	24686358	24686364	22.5	-	.	Name=DARACWW_1:24686354-24686367(-)+;Alias=MEME-1;ID=DARACWW-MEME-1-1-1:24686354-24686367(-);pvalue=0.00567;qvalue=0.0952;sequence=GTGACTT;
1	fimo	nucleotide_motif	24695708	24695714	21.9	-	.	Name=DARACWW_1:24695703-24695716(-)+;Alias=MEME-1;ID=DARACWW-MEME-1-1-1:24695703-24695716(-);pvalue=0.00642;qvalue=0.0978;sequence=GAGATTT;
1	fimo	nucleotide_motif	24729794	24729800	22.5	-	.	Name=DARACWW_1:24729790-24729803(-)+;Alias=MEME-1;ID=DARACWW-MEME-1-1-1:24729790-24729803(-);pvalue=0.00567;qvalue=0.0952;sequence=GTGACTT;
1	fimo	nucleotide_motif	24774279	24774285	22.5	-	.	Name=DARACWW_1:24774273-24774289(-)+;Alias=MEME-1;ID=DARACWW-MEME-1-1-1:24774273-24774289(-);pvalue=0.00567;qvalue=0.0952;sequence=GTGACTT;
1	fimo	nucleotide_motif	24840527	24840533	25.7	+	.	Name=DARACWW_1:24840521-24840534(+)+;Alias=MEME-1;ID=DARACWW-MEME-1-1-1:24840521-24840534(+);pvalue=0.00267;qvalue=0.0794;sequence=TAGACAA;
1	fimo	nucleotide_motif	24840552	24840558	24.9	+	.	Name=DARACWW_1:24840545-24840559(+)+;Alias=MEME-1;ID=DARACWW-MEME-1-1-1:24840545-24840559(+);pvalue=0.00323;qvalue=0.0822;sequence=AAGACAA;
1	fimo	nucleotide_motif	24863892	24863898	22.2	-	.	Name=DARACWW_1:24863887-24863900(-)+;Alias=MEME-1;ID=DARACWW-MEME-1-1-1:24863887-24863900(-);pvalue=0.00599;qvalue=0.0965;sequence=TAGATTT;
1	fimo	nucleotide_motif	24973112	24973118	25.6	-	.	Name=DARACWW_1:24973110-24973123(-)+;Alias=MEME-1;ID=DARACWW-MEME-1-1-1:24973110-24973123(-);pvalue=0.00274;qvalue=0.0794;sequence=CAGACAT;
1	fimo	nucleotide_motif	24992688	24992694	21.9	-	.	Name=DARACWW_1:24992683-24992697(-)+;Alias=MEME-1;ID=DARACWW-MEME-1-1-1:24992683-24992697(-);pvalue=0.00652;qvalue=0.0978;sequence=AAGATTT;
1	fimo	nucleotide_motif	24997367	24997373	27.7	-	.	Name=DARACWW_1:24997364-24997377(-)+;Alias=MEME-1;ID=DARACWW-MEME-1-1-1:24997364-24997377(-);pvalue=0.0017;qvalue=0.0732;sequence=AAAACAT;
1	fimo	nucleotide_motif	25163689	25163695	23.3	-	.	Name=DARACWW_1:25163685-25163698(-)+;Alias=MEME-1;ID=DARACWW-MEME-1-1-1:25163685-25163698(-);pvalue=0.00471;qvalue=0.0905;sequence=GAAACAA;
1	fimo	nucleotide_motif	25163729	25163735	41.1	-	.	Name=DARACWW_1:25163727-25163740(-)+;Alias=MEME-1;ID=DARACWW-MEME-1-1-1:25163727-25163740(-);pvalue=7.71e-05;qvalue=0.0467;sequence=TAGACTT;
1	fimo	nucleotide_motif	25236718	25236724	26	+	.	Name=DARACWW_1:25236711-25236724(+)+;Alias=MEME-1;ID=DARACWW-MEME-1-1-1:25236711-25236724(+);pvalue=0.00252;qvalue=0.0778;sequence=AAAACTC;
1	fimo	nucleotide_motif	25263709	25263715	24.9	+	.	Name=DARACWW_1:25263702-25263716(+)+;Alias=MEME-1;ID=DARACWW-MEME-1-1-1:25263702-25263716(+);pvalue=0.00323;qvalue=0.0822;sequence=AAGACAA;
1	fimo	nucleotide_motif	25263720	25263726	22.2	+	.	Name=DARACWW_1:25263712-25263726(+)+;Alias=MEME-1;ID=DARACWW-MEME-1-1-1:25263712-25263726(+);pvalue=0.00599;qvalue=0.0965;sequence=TAGATTT;
1	fimo	nucleotide_motif	25263747	25263753	22.2	+	.	Name=DARACWW_1:25263743-25263756(+)+;Alias=MEME-1;ID=DARACWW-MEME-1-1-1:25263743-25263756(+);pvalue=0.00599;qvalue=0.0965;sequence=ATGACTT;
1	fimo	nucleotide_motif	25278645	25278651	23.3	+	.	Name=DARACWW_1:25278639-25278652(+)+;Alias=MEME-1;ID=DARACWW-MEME-1-1-1:25278639-25278652(+);pvalue=0.00471;qvalue=0.0905;sequence=GAAACTG;
1	fimo	nucleotide_motif	25375988	25375994	22.2	+	.	Name=DARACWW_1:25375985-25375998(+)+;Alias=MEME-1;ID=DARACWW-MEME-1-1-1:25375985-25375998(+);pvalue=0.00599;qvalue=0.0965;sequence=TAGATTT;
1	fimo	nucleotide_motif	25393451	25393457	36.5	+	.	Name=DARACWW_1:25393444-25393458(+)+;Alias=MEME-1;ID=DARACWW-MEME-1-1-1:25393444-25393458(+);pvalue=0.000224;qvalue=0.0467;sequence=AAGACTT;
1	fimo	nucleotide_motif	25394327	25394333	24.3	-	.	Name=DARACWW_1:25394321-25394337(-)+;Alias=MEME-1;ID=DARACWW-MEME-1-1-1:25394321-25394337(-);pvalue=0.00367;qvalue=0.0857;sequence=TGGACTA;
1	fimo	nucleotide_motif	25415915	25415921	23.3	-	.	Name=DARACWW_1:25415908-25415921(-)+;Alias=MEME-1;ID=DARACWW-MEME-1-1-1:25415908-25415921(-);pvalue=0.00471;qvalue=0.0905;sequence=GAAACAA;
1	fimo	nucleotide_motif	25436988	25436994	30.2	+	.	Name=DARACWW_1:25436984-25436997(+)+;Alias=MEME-1;ID=DARACWW-MEME-1-1-1:25436984-25436997(+);pvalue=0.000945;qvalue=0.0635;sequence=TGGACTT;
1	fimo	nucleotide_motif	25437039	25437045	36.5	+	.	Name=DARACWW_1:25437033-25437046(+)+;Alias=MEME-1;ID=DARACWW-MEME-1-1-1:25437033-25437046(+);pvalue=0.000224;qvalue=0.0467;sequence=AAGACTT;
1	fimo	nucleotide_motif	25449501	25449507	25.5	-	.	Name=DARACWW_1:25449497-25449510(-)+;Alias=MEME-1;ID=DARACWW-MEME-1-1-1:25449497-25449510(-);pvalue=0.00281;qvalue=0.0801;sequence=TGGACAT;
1	fimo	nucleotide_motif	25495804	25495810	23.3	+	.	Name=DARACWW_1:25495798-25495811(+)+;Alias=MEME-1;ID=DARACWW-MEME-1-1-1:25495798-25495811(+);pvalue=0.00471;qvalue=0.0905;sequence=GAAACAA;
1	fimo	nucleotide_motif	25515306	25515312	21.8	-	.	Name=DARACWW_1:25515304-25515318(-)+;Alias=MEME-1;ID=DARACWW-MEME-1-1-1:25515304-25515318(-);pvalue=0.00665;qvalue=0.0986;sequence=AAGACAG;
1	fimo	nucleotide_motif	25561060	25561066	24.3	+	.	Name=DARACWW_1:25561054-25561067(+)+;Alias=MEME-1;ID=DARACWW-MEME-1-1-1:25561054-25561067(+);pvalue=0.00367;qvalue=0.0857;sequence=AAGACAC;
1	fimo	nucleotide_motif	25571611	25571617	26.5	+	.	Name=DARACWW_1:25571604-25571617(+)+;Alias=MEME-1;ID=DARACWW-MEME-1-1-1:25571604-25571617(+);pvalue=0.00222;qvalue=0.0769;sequence=AAAACTA;
1	fimo	nucleotide_motif	25598400	25598406	28.2	-	.	Name=DARACWW_1:25598397-25598410(-)+;Alias=MEME-1;ID=DARACWW-MEME-1-1-1:25598397-25598410(-);pvalue=0.00151;qvalue=0.0732;sequence=TAAACAT;
1	fimo	nucleotide_motif	25601354	25601360	28.9	+	.	Name=DARACWW_1:25601350-25601363(+)+;Alias=MEME-1;ID=DARACWW-MEME-1-1-1:25601350-25601363(+);pvalue=0.00128;qvalue=0.0722;sequence=AGGACTT;
1	fimo	nucleotide_motif	25757509	25757515	23.7	-	.	Name=DARACWW_1:25757505-25757519(-)+;Alias=MEME-1;ID=DARACWW-MEME-1-1-1:25757505-25757519(-);pvalue=0.00431;qvalue=0.0905;sequence=TAAACAA;
1	fimo	nucleotide_motif	25777951	25777957	24.9	-	.	Name=DARACWW_1:25777947-25777960(-)+;Alias=MEME-1;ID=DARACWW-MEME-1-1-1:25777947-25777960(-);pvalue=0.00323;qvalue=0.0822;sequence=AAGACTG;
1	fimo	nucleotide_motif	25777996	25778002	27.7	-	.	Name=DARACWW_1:25777992-25778006(-)+;Alias=MEME-1;ID=DARACWW-MEME-1-1-1:25777992-25778006(-);pvalue=0.0017;qvalue=0.0732;sequence=AAAACAT;
1	fimo	nucleotide_motif	25778015	25778021	23.7	-	.	Name=DARACWW_1:25778008-25778024(-)+;Alias=MEME-1;ID=DARACWW-MEME-1-1-1:25778008-25778024(-);pvalue=0.00431;qvalue=0.0905;sequence=AGGACTC;
1	fimo	nucleotide_motif	25872644	25872650	24.1	-	.	Name=DARACWW_1:25872642-25872655(-)+;Alias=MEME-1;ID=DARACWW-MEME-1-1-1:25872642-25872655(-);pvalue=0.00384;qvalue=0.0872;sequence=CAGACTC;
1	fimo	nucleotide_motif	25943708	25943714	35	+	.	Name=DARACWW_1:25943702-25943715(+)+;Alias=MEME-1;ID=DARACWW-MEME-1-1-1:25943702-25943715(+);pvalue=0.000319;qvalue=0.0508;sequence=TAAACTT;
1	fimo	nucleotide_motif	26037554	26037560	30.2	+	.	Name=DARACWW_1:26037550-26037563(+)+;Alias=MEME-1;ID=DARACWW-MEME-1-1-1:26037550-26037563(+);pvalue=0.000945;qvalue=0.0635;sequence=TGGACTT;
1	fimo	nucleotide_motif	26086370	26086376	21.8	+	.	Name=DARACWW_1:26086364-26086377(+)+;Alias=MEME-1;ID=DARACWW-MEME-1-1-1:26086364-26086377(+);pvalue=0.00665;qvalue=0.0986;sequence=AAGACAG;
1	fimo	nucleotide_motif	26090333	26090339	24.3	+	.	Name=DARACWW_1:26090327-26090340(+)+;Alias=MEME-1;ID=DARACWW-MEME-1-1-1:26090327-26090340(+);pvalue=0.00367;qvalue=0.0857;sequence=AAGACAC;
1	fimo	nucleotide_motif	26096891	26096897	38.4	+	.	Name=DARACWW_1:26096887-26096900(+)+;Alias=MEME-1;ID=DARACWW-MEME-1-1-1:26096887-26096900(+);pvalue=0.000143;qvalue=0.0467;sequence=GAGACTT;
1	fimo	nucleotide_motif	26111935	26111941	38.4	-	.	Name=DARACWW_1:26111931-26111944(-)+;Alias=MEME-1;ID=DARACWW-MEME-1-1-1:26111931-26111944(-);pvalue=0.000143;qvalue=0.0467;sequence=GAGACTT;
1	fimo	nucleotide_motif	26191145	26191151	27.7	+	.	Name=DARACWW_1:26191138-26191152(+)+;Alias=MEME-1;ID=DARACWW-MEME-1-1-1:26191138-26191152(+);pvalue=0.0017;qvalue=0.0732;sequence=AAAACAT;
1	fimo	nucleotide_motif	26191281	26191287	34	+	.	Name=DARACWW_1:26191279-26191293(+)+;Alias=MEME-1;ID=DARACWW-MEME-1-1-1:26191279-26191293(+);pvalue=0.0004;qvalue=0.0508;sequence=GAAACTT;
1	fimo	nucleotide_motif	26193759	26193765	28.2	-	.	Name=DARACWW_1:26193756-26193769(-)+;Alias=MEME-1;ID=DARACWW-MEME-1-1-1:26193756-26193769(-);pvalue=0.00151;qvalue=0.0732;sequence=TAAACAT;
1	fimo	nucleotide_motif	26234724	26234730	24.9	+	.	Name=DARACWW_1:26234717-26234731(+)+;Alias=MEME-1;ID=DARACWW-MEME-1-1-1:26234717-26234731(+);pvalue=0.00323;qvalue=0.0822;sequence=AAGACTG;
1	fimo	nucleotide_motif	26234736	26234742	23.7	+	.	Name=DARACWW_1:26234730-26234744(+)+;Alias=MEME-1;ID=DARACWW-MEME-1-1-1:26234730-26234744(+);pvalue=0.00431;qvalue=0.0905;sequence=TAAACTG;
1	fimo	nucleotide_motif	26234864	26234870	41.1	+	.	Name=DARACWW_1:26234858-26234871(+)+;Alias=MEME-1;ID=DARACWW-MEME-1-1-1:26234858-26234871(+);pvalue=7.71e-05;qvalue=0.0467;sequence=TAGACTT;
1	fimo	nucleotide_motif	26293791	26293797	30.2	-	.	Name=DARACWW_1:26293787-26293800(-)+;Alias=MEME-1;ID=DARACWW-MEME-1-1-1:26293787-26293800(-);pvalue=0.000945;qvalue=0.0635;sequence=TGGACTT;
1	fimo	nucleotide_motif	26356437	26356443	29.1	-	.	Name=DARACWW_1:26356433-26356446(-)+;Alias=MEME-1;ID=DARACWW-MEME-1-1-1:26356433-26356446(-);pvalue=0.00122;qvalue=0.0702;sequence=GGGACTT;
1	fimo	nucleotide_motif	26422327	26422333	24.3	+	.	Name=DARACWW_1:26422323-26422337(+)+;Alias=MEME-1;ID=DARACWW-MEME-1-1-1:26422323-26422337(+);pvalue=0.00367;qvalue=0.0857;sequence=GAGACCT;
1	fimo	nucleotide_motif	26488602	26488608	22.2	-	.	Name=DARACWW_1:26488597-26488610(-)+;Alias=MEME-1;ID=DARACWW-MEME-1-1-1:26488597-26488610(-);pvalue=0.00599;qvalue=0.0965;sequence=TAGATTT;
1	fimo	nucleotide_motif	26504410	26504416	22.1	+	.	Name=DARACWW_1:26504408-26504421(+)+;Alias=MEME-1;ID=DARACWW-MEME-1-1-1:26504408-26504421(+);pvalue=0.00612;qvalue=0.0968;sequence=CAAACTC;
1	fimo	nucleotide_motif	26533974	26533980	34	-	.	Name=DARACWW_1:26533967-26533980(-)+;Alias=MEME-1;ID=DARACWW-MEME-1-1-1:26533967-26533980(-);pvalue=0.0004;qvalue=0.0508;sequence=GAAACTT;
1	fimo	nucleotide_motif	26534036	26534042	33	-	.	Name=DARACWW_1:26534035-26534049(-)+;Alias=MEME-1;ID=DARACWW-MEME-1-1-1:26534035-26534049(-);pvalue=0.0005;qvalue=0.0508;sequence=AAAACTT;
1	fimo	nucleotide_motif	26534116	26534122	24.3	-	.	Name=DARACWW_1:26534110-26534125(-)+;Alias=MEME-1;ID=DARACWW-MEME-1-1-1:26534110-26534125(-);pvalue=0.00367;qvalue=0.0857;sequence=AAGACAC;
1	fimo	nucleotide_motif	26621002	26621008	30.5	-	.	Name=DARACWW_1:26620995-26621009(-)+;Alias=MEME-1;ID=DARACWW-MEME-1-1-1:26620995-26621009(-);pvalue=0.000882;qvalue=0.0619;sequence=CAGACTT;
1	fimo	nucleotide_motif	26626348	26626354	23.7	+	.	Name=DARACWW_1:26626342-26626355(+)+;Alias=MEME-1;ID=DARACWW-MEME-1-1-1:26626342-26626355(+);pvalue=0.00431;qvalue=0.0905;sequence=TAAACTG;
1	fimo	nucleotide_motif	26641982	26641988	25.2	+	.	Name=DARACWW_1:26641978-26641991(+)+;Alias=MEME-1;ID=DARACWW-MEME-1-1-1:26641978-26641991(+);pvalue=0.003;qvalue=0.0822;sequence=GAGACAA;
1	fimo	nucleotide_motif	26642129	26642135	23	+	.	Name=DARACWW_1:26642125-26642138(+)+;Alias=MEME-1;ID=DARACWW-MEME-1-1-1:26642125-26642138(+);pvalue=0.00506;qvalue=0.0905;sequence=TAAACCT;
1	fimo	nucleotide_motif	26657009	26657015	24	+	.	Name=DARACWW_1:26657004-26657018(+)+;Alias=MEME-1;ID=DARACWW-MEME-1-1-1:26657004-26657018(+);pvalue=0.00395;qvalue=0.0888;sequence=TGGACTC;
1	fimo	nucleotide_motif	26688233	26688239	25.2	+	.	Name=DARACWW_1:26688227-26688240(+)+;Alias=MEME-1;ID=DARACWW-MEME-1-1-1:26688227-26688240(+);pvalue=0.003;qvalue=0.0822;sequence=GAGACTG;
1	fimo	nucleotide_motif	26688397	26688403	25.7	-	.	Name=DARACWW_1:26688393-26688406(-)+;Alias=MEME-1;ID=DARACWW-MEME-1-1-1:26688393-26688406(-);pvalue=0.00267;qvalue=0.0794;sequence=TAGACTG;
1	fimo	nucleotide_motif	26708104	26708110	27.4	+	.	Name=DARACWW_1:26708098-26708111(+)+;Alias=MEME-1;ID=DARACWW-MEME-1-1-1:26708098-26708111(+);pvalue=0.0018;qvalue=0.0746;sequence=TAAACTA;
1	fimo	nucleotide_motif	26790739	26790745	29.3	-	.	Name=DARACWW_1:26790735-26790748(-)+;Alias=MEME-1;ID=DARACWW-MEME-1-1-1:26790735-26790748(-);pvalue=0.00116;qvalue=0.0681;sequence=AAGACTA;
1	fimo	nucleotide_motif	26807242	26807248	23	-	.	Name=DARACWW_1:26807238-26807252(-)+;Alias=MEME-1;ID=DARACWW-MEME-1-1-1:26807238-26807252(-);pvalue=0.00506;qvalue=0.0905;sequence=TAAACCT;
1	fimo	nucleotide_motif	26809937	26809943	24.6	-	.	Name=DARACWW_1:26809933-26809946(-)+;Alias=MEME-1;ID=DARACWW-MEME-1-1-1:26809933-26809946(-);pvalue=0.00348;qvalue=0.0846;sequence=GAGACAC;
1	fimo	nucleotide_motif	26861729	26861735	36.5	-	.	Name=DARACWW_1:26861727-26861741(-)+;Alias=MEME-1;ID=DARACWW-MEME-1-1-1:26861727-26861741(-);pvalue=0.000224;qvalue=0.0467;sequence=AAGACTT;
1	fimo	nucleotide_motif	26861749	26861755	26.7	-	.	Name=DARACWW_1:26861745-26861758(-)+;Alias=MEME-1;ID=DARACWW-MEME-1-1-1:26861745-26861758(-);pvalue=0.00212;qvalue=0.0766;sequence=GAAACTA;
1	fimo	nucleotide_motif	26869806	26869812	36.5	+	.	Name=DARACWW_1:26869799-26869813(+)+;Alias=MEME-1;ID=DARACWW-MEME-1-1-1:26869799-26869813(+);pvalue=0.000224;qvalue=0.0467;sequence=AAGACTT;
1	fimo	nucleotide_motif	26933213	26933219	26.2	+	.	Name=DARACWW_1:26933206-26933219(+)+;Alias=MEME-1;ID=DARACWW-MEME-1-1-1:26933206-26933219(+);pvalue=0.00237;qvalue=0.0778;sequence=AGAACTT;
1	fimo	nucleotide_motif	26933268	26933274	30.9	+	.	Name=DARACWW_1:26933262-26933275(+)+;Alias=MEME-1;ID=DARACWW-MEME-1-1-1:26933262-26933275(+);pvalue=0.000818;qvalue=0.0606;sequence=TAGACTA;
1	fimo	nucleotide_motif	26937386	26937392	23.3	+	.	Name=DARACWW_1:26937380-26937393(+)+;Alias=MEME-1;ID=DARACWW-MEME-1-1-1:26937380-26937393(+);pvalue=0.00471;qvalue=0.0905;sequence=GAAACAA;
1	fimo	nucleotide_motif	26985929	26985935	22.2	+	.	Name=DARACWW_1:26985922-26985935(+)+;Alias=MEME-1;ID=DARACWW-MEME-1-1-1:26985922-26985935(+);pvalue=0.00599;qvalue=0.0965;sequence=ATGACTT;
1	fimo	nucleotide_motif	26986102	26986108	33	-	.	Name=DARACWW_1:26986097-26986110(-)+;Alias=MEME-1;ID=DARACWW-MEME-1-1-1:26986097-26986110(-);pvalue=0.0005;qvalue=0.0508;sequence=AAAACTT;
1	fimo	nucleotide_motif	27002564	27002570	25.7	-	.	Name=DARACWW_1:27002562-27002575(-)+;Alias=MEME-1;ID=DARACWW-MEME-1-1-1:27002562-27002575(-);pvalue=0.00267;qvalue=0.0794;sequence=TAGACAA;
1	fimo	nucleotide_motif	27028863	27028869	36.5	+	.	Name=DARACWW_1:27028857-27028870(+)+;Alias=MEME-1;ID=DARACWW-MEME-1-1-1:27028857-27028870(+);pvalue=0.000224;qvalue=0.0467;sequence=AAGACTT;
1	fimo	nucleotide_motif	27064315	27064321	23.7	+	.	Name=DARACWW_1:27064309-27064322(+)+;Alias=MEME-1;ID=DARACWW-MEME-1-1-1:27064309-27064322(+);pvalue=0.00431;qvalue=0.0905;sequence=TAAACAA;
1	fimo	nucleotide_motif	27080398	27080404	26.7	-	.	Name=DARACWW_1:27080394-27080407(-)+;Alias=MEME-1;ID=DARACWW-MEME-1-1-1:27080394-27080407(-);pvalue=0.00212;qvalue=0.0766;sequence=GAAACTA;
1	fimo	nucleotide_motif	27109465	27109471	22.1	-	.	Name=DARACWW_1:27109459-27109472(-)+;Alias=MEME-1;ID=DARACWW-MEME-1-1-1:27109459-27109472(-);pvalue=0.00612;qvalue=0.0968;sequence=CAAACTC;
1	fimo	nucleotide_motif	27153753	27153759	41.1	-	.	Name=DARACWW_1:27153749-27153762(-)+;Alias=MEME-1;ID=DARACWW-MEME-1-1-1:27153749-27153762(-);pvalue=7.71e-05;qvalue=0.0467;sequence=TAGACTT;
1	fimo	nucleotide_motif	27153788	27153794	27.3	-	.	Name=DARACWW_1:27153782-27153795(-)+;Alias=MEME-1;ID=DARACWW-MEME-1-1-1:27153782-27153795(-);pvalue=0.00188;qvalue=0.0756;sequence=CAAACTT;
1	fimo	nucleotide_motif	27157612	27157618	23	+	.	Name=DARACWW_1:27157606-27157619(+)+;Alias=MEME-1;ID=DARACWW-MEME-1-1-1:27157606-27157619(+);pvalue=0.00506;qvalue=0.0905;sequence=TAAACCT;
1	fimo	nucleotide_motif	27157622	27157628	24.9	+	.	Name=DARACWW_1:27157614-27157629(+)+;Alias=MEME-1;ID=DARACWW-MEME-1-1-1:27157614-27157629(+);pvalue=0.00323;qvalue=0.0822;sequence=AAGACAA;
1	fimo	nucleotide_motif	27167277	27167283	38.4	+	.	Name=DARACWW_1:27167271-27167284(+)+;Alias=MEME-1;ID=DARACWW-MEME-1-1-1:27167271-27167284(+);pvalue=0.000143;qvalue=0.0467;sequence=GAGACTT;
1	fimo	nucleotide_motif	27243107	27243113	32.3	-	.	Name=DARACWW_1:27243103-27243116(-)+;Alias=MEME-1;ID=DARACWW-MEME-1-1-1:27243103-27243116(-);pvalue=0.000582;qvalue=0.0548;sequence=TAGACAT;
1	fimo	nucleotide_motif	27251241	27251247	32.3	+	.	Name=DARACWW_1:27251237-27251250(+)+;Alias=MEME-1;ID=DARACWW-MEME-1-1-1:27251237-27251250(+);pvalue=0.000582;qvalue=0.0548;sequence=TAGACAT;
1	fimo	nucleotide_motif	27295317	27295323	24.7	-	.	Name=DARACWW_1:27295313-27295326(-)+;Alias=MEME-1;ID=DARACWW-MEME-1-1-1:27295313-27295326(-);pvalue=0.00342;qvalue=0.0846;sequence=AGGACAT;
1	fimo	nucleotide_motif	27346328	27346334	25.6	-	.	Name=DARACWW_1:27346324-27346337(-)+;Alias=MEME-1;ID=DARACWW-MEME-1-1-1:27346324-27346337(-);pvalue=0.00274;qvalue=0.0794;sequence=CAGACAT;
1	fimo	nucleotide_motif	27353617	27353623	41.1	+	.	Name=DARACWW_1:27353611-27353624(+)+;Alias=MEME-1;ID=DARACWW-MEME-1-1-1:27353611-27353624(+);pvalue=7.71e-05;qvalue=0.0467;sequence=TAGACTT;
1	fimo	nucleotide_motif	27376293	27376299	38.4	+	.	Name=DARACWW_1:27376287-27376300(+)+;Alias=MEME-1;ID=DARACWW-MEME-1-1-1:27376287-27376300(+);pvalue=0.000143;qvalue=0.0467;sequence=GAGACTT;
1	fimo	nucleotide_motif	27376339	27376345	28.5	+	.	Name=DARACWW_1:27376335-27376348(+)+;Alias=MEME-1;ID=DARACWW-MEME-1-1-1:27376335-27376348(+);pvalue=0.00141;qvalue=0.0732;sequence=AAGACTC;
1	fimo	nucleotide_motif	27376367	27376373	24.9	+	.	Name=DARACWW_1:27376360-27376374(+)+;Alias=MEME-1;ID=DARACWW-MEME-1-1-1:27376360-27376374(+);pvalue=0.00323;qvalue=0.0822;sequence=AAGACAA;
1	fimo	nucleotide_motif	27376371	27376377	22.1	+	.	Name=DARACWW_1:27376365-27376378(+)+;Alias=MEME-1;ID=DARACWW-MEME-1-2-1:27376365-27376378(+);pvalue=0.00612;qvalue=0.0968;sequence=CAAACTC;
1	fimo	nucleotide_motif	27376388	27376394	29.7	+	.	Name=DARACWW_1:27376382-27376395(+)+;Alias=MEME-1;ID=DARACWW-MEME-1-1-1:27376382-27376395(+);pvalue=0.00108;qvalue=0.0664;sequence=GAGACTA;
1	fimo	nucleotide_motif	27376404	27376410	36.5	+	.	Name=DARACWW_1:27376400-27376413(+)+;Alias=MEME-1;ID=DARACWW-MEME-1-1-1:27376400-27376413(+);pvalue=0.000224;qvalue=0.0467;sequence=AAGACTT;
1	fimo	nucleotide_motif	27384255	27384261	33	+	.	Name=DARACWW_1:27384254-27384267(+)+;Alias=MEME-1;ID=DARACWW-MEME-1-1-1:27384254-27384267(+);pvalue=0.0005;qvalue=0.0508;sequence=AAAACTT;
1	fimo	nucleotide_motif	27384469	27384475	23.3	+	.	Name=DARACWW_1:27384463-27384476(+)+;Alias=MEME-1;ID=DARACWW-MEME-1-1-1:27384463-27384476(+);pvalue=0.00471;qvalue=0.0905;sequence=GAAACTG;
1	fimo	nucleotide_motif	27393226	27393232	26.7	+	.	Name=DARACWW_1:27393220-27393233(+)+;Alias=MEME-1;ID=DARACWW-MEME-1-1-1:27393220-27393233(+);pvalue=0.00212;qvalue=0.0766;sequence=GAAACTA;
1	fimo	nucleotide_motif	27474993	27474999	22.2	+	.	Name=DARACWW_1:27474985-27474999(+)+;Alias=MEME-1;ID=DARACWW-MEME-1-1-1:27474985-27474999(+);pvalue=0.00599;qvalue=0.0965;sequence=AAAACCT;
1	fimo	nucleotide_motif	27540382	27540388	36.5	-	.	Name=DARACWW_1:27540378-27540391(-)+;Alias=MEME-1;ID=DARACWW-MEME-1-1-1:27540378-27540391(-);pvalue=0.000224;qvalue=0.0467;sequence=AAGACTT;
1	fimo	nucleotide_motif	27627653	27627659	23.7	+	.	Name=DARACWW_1:27627647-27627660(+)+;Alias=MEME-1;ID=DARACWW-MEME-1-1-1:27627647-27627660(+);pvalue=0.00431;qvalue=0.0905;sequence=TAAACAA;
1	fimo	nucleotide_motif	27632779	27632785	26.7	+	.	Name=DARACWW_1:27632773-27632786(+)+;Alias=MEME-1;ID=DARACWW-MEME-1-1-1:27632773-27632786(+);pvalue=0.00212;qvalue=0.0766;sequence=GAAACTA;
1	fimo	nucleotide_motif	27690476	27690482	22.8	-	.	Name=DARACWW_1:27690472-27690487(-)+;Alias=MEME-1;ID=DARACWW-MEME-1-1-1:27690472-27690487(-);pvalue=0.0053;qvalue=0.093;sequence=CAAACTA;
1	fimo	nucleotide_motif	27704077	27704083	32.3	-	.	Name=DARACWW_1:27704073-27704086(-)+;Alias=MEME-1;ID=DARACWW-MEME-1-1-1:27704073-27704086(-);pvalue=0.000582;qvalue=0.0548;sequence=TAGACAT;
1	fimo	nucleotide_motif	27763813	27763819	22.2	-	.	Name=DARACWW_1:27763808-27763821(-)+;Alias=MEME-1;ID=DARACWW-MEME-1-1-1:27763808-27763821(-);pvalue=0.00599;qvalue=0.0965;sequence=TAGATTT;
1	fimo	nucleotide_motif	27787624	27787630	24.9	+	.	Name=DARACWW_1:27787617-27787631(+)+;Alias=MEME-1;ID=DARACWW-MEME-1-1-1:27787617-27787631(+);pvalue=0.00323;qvalue=0.0822;sequence=AAGACTG;
1	fimo	nucleotide_motif	27787630	27787636	34	+	.	Name=DARACWW_1:27787624-27787637(+)+;Alias=MEME-1;ID=DARACWW-MEME-1-1-1:27787624-27787637(+);pvalue=0.0004;qvalue=0.0508;sequence=GAAACTT;
1	fimo	nucleotide_motif	27828839	27828845	26.7	+	.	Name=DARACWW_1:27828833-27828846(+)+;Alias=MEME-1;ID=DARACWW-MEME-1-1-1:27828833-27828846(+);pvalue=0.00212;qvalue=0.0766;sequence=GAAACTA;
1	fimo	nucleotide_motif	27828857	27828863	28	+	.	Name=DARACWW_1:27828851-27828864(+)+;Alias=MEME-1;ID=DARACWW-MEME-1-1-1:27828851-27828864(+);pvalue=0.00159;qvalue=0.0732;sequence=GAAACAT;
1	fimo	nucleotide_motif	27849935	27849941	31.9	-	.	Name=DARACWW_1:27849929-27849942(-)+;Alias=MEME-1;ID=DARACWW-MEME-1-1-1:27849929-27849942(-);pvalue=0.000651;qvalue=0.0555;sequence=GAGACAT;
1	fimo	nucleotide_motif	27851700	27851706	24.9	-	.	Name=DARACWW_1:27851698-27851711(-)+;Alias=MEME-1;ID=DARACWW-MEME-1-1-1:27851698-27851711(-);pvalue=0.00323;qvalue=0.0822;sequence=AAGACAA;
1	fimo	nucleotide_motif	27916979	27916985	24.3	+	.	Name=DARACWW_1:27916975-27916988(+)+;Alias=MEME-1;ID=DARACWW-MEME-1-1-1:27916975-27916988(+);pvalue=0.00367;qvalue=0.0857;sequence=GAGACCT;
1	fimo	nucleotide_motif	27917028	27917034	23	+	.	Name=DARACWW_1:27917021-27917034(+)+;Alias=MEME-1;ID=DARACWW-MEME-1-1-1:27917021-27917034(+);pvalue=0.00506;qvalue=0.0905;sequence=AAAACTG;
1	fimo	nucleotide_motif	27922860	27922866	22.1	-	.	Name=DARACWW_1:27922856-27922869(-)+;Alias=MEME-1;ID=DARACWW-MEME-1-1-1:27922856-27922869(-);pvalue=0.00612;qvalue=0.0968;sequence=CAAACTC;
1	fimo	nucleotide_motif	27922898	27922904	38.4	-	.	Name=DARACWW_1:27922894-27922907(-)+;Alias=MEME-1;ID=DARACWW-MEME-1-1-1:27922894-27922907(-);pvalue=0.000143;qvalue=0.0467;sequence=GAGACTT;
1	fimo	nucleotide_motif	27928282	27928288	23	-	.	Name=DARACWW_1:27928276-27928289(-)+;Alias=MEME-1;ID=DARACWW-MEME-1-1-1:27928276-27928289(-);pvalue=0.00506;qvalue=0.0905;sequence=TTGACTT;
1	fimo	nucleotide_motif	27928390	27928396	35	-	.	Name=DARACWW_1:27928387-27928400(-)+;Alias=MEME-1;ID=DARACWW-MEME-1-1-1:27928387-27928400(-);pvalue=0.000319;qvalue=0.0508;sequence=TAAACTT;
1	fimo	nucleotide_motif	27948161	27948167	29.7	-	.	Name=DARACWW_1:27948159-27948172(-)+;Alias=MEME-1;ID=DARACWW-MEME-1-1-1:27948159-27948172(-);pvalue=0.00108;qvalue=0.0664;sequence=GAGACTA;
1	fimo	nucleotide_motif	27992846	27992852	23.3	+	.	Name=DARACWW_1:27992840-27992853(+)+;Alias=MEME-1;ID=DARACWW-MEME-1-1-1:27992840-27992853(+);pvalue=0.00471;qvalue=0.0905;sequence=GAAACAA;
1	fimo	nucleotide_motif	28009621	28009627	24.9	-	.	Name=DARACWW_1:28009619-28009632(-)+;Alias=MEME-1;ID=DARACWW-MEME-1-1-1:28009619-28009632(-);pvalue=0.00323;qvalue=0.0822;sequence=AAGACAA;
1	fimo	nucleotide_motif	28017720	28017726	29.7	-	.	Name=DARACWW_1:28017716-28017729(-)+;Alias=MEME-1;ID=DARACWW-MEME-1-1-1:28017716-28017729(-);pvalue=0.00108;qvalue=0.0664;sequence=GAGACTA;
1	fimo	nucleotide_motif	28034639	28034645	38.4	+	.	Name=DARACWW_1:28034635-28034648(+)+;Alias=MEME-1;ID=DARACWW-MEME-1-1-1:28034635-28034648(+);pvalue=0.000143;qvalue=0.0467;sequence=GAGACTT;
1	fimo	nucleotide_motif	28079810	28079816	30.2	+	.	Name=DARACWW_1:28079806-28079819(+)+;Alias=MEME-1;ID=DARACWW-MEME-1-1-1:28079806-28079819(+);pvalue=0.000945;qvalue=0.0635;sequence=TGGACTT;
1	fimo	nucleotide_motif	28079932	28079938	31.3	+	.	Name=DARACWW_1:28079925-28079941(+)+;Alias=MEME-1;ID=DARACWW-MEME-1-1-1:28079925-28079941(+);pvalue=0.000737;qvalue=0.0566;sequence=AAGACAT;
1	fimo	nucleotide_motif	28101666	28101672	27.4	+	.	Name=DARACWW_1:28101660-28101674(+)+;Alias=MEME-1;ID=DARACWW-MEME-1-1-1:28101660-28101674(+);pvalue=0.0018;qvalue=0.0746;sequence=TAAACTA;
1	fimo	nucleotide_motif	28129929	28129935	24.1	-	.	Name=DARACWW_1:28129923-28129936(-)+;Alias=MEME-1;ID=DARACWW-MEME-1-1-1:28129923-28129936(-);pvalue=0.00384;qvalue=0.0872;sequence=CAGACTC;
1	fimo	nucleotide_motif	28129959	28129965	23	-	.	Name=DARACWW_1:28129956-28129969(-)+;Alias=MEME-1;ID=DARACWW-MEME-1-1-1:28129956-28129969(-);pvalue=0.00506;qvalue=0.0905;sequence=AAAACTG;
1	fimo	nucleotide_motif	28139061	28139067	22.2	-	.	Name=DARACWW_1:28139057-28139070(-)+;Alias=MEME-1;ID=DARACWW-MEME-1-1-1:28139057-28139070(-);pvalue=0.00599;qvalue=0.0965;sequence=AAAACCT;
1	fimo	nucleotide_motif	28139074	28139080	26.1	-	.	Name=DARACWW_1:28139068-28139081(-)+;Alias=MEME-1;ID=DARACWW-MEME-1-1-1:28139068-28139081(-);pvalue=0.00244;qvalue=0.0778;sequence=GAAACTC;
1	fimo	nucleotide_motif	28148757	28148763	26	-	.	Name=DARACWW_1:28148751-28148766(-)+;Alias=MEME-1;ID=DARACWW-MEME-1-1-1:28148751-28148766(-);pvalue=0.00252;qvalue=0.0778;sequence=AAAACTC;
1	fimo	nucleotide_motif	28157694	28157700	33	-	.	Name=DARACWW_1:28157687-28157700(-)+;Alias=MEME-1;ID=DARACWW-MEME-1-1-1:28157687-28157700(-);pvalue=0.0005;qvalue=0.0508;sequence=AAAACTT;
1	fimo	nucleotide_motif	28187347	28187353	23.3	+	.	Name=DARACWW_1:28187341-28187354(+)+;Alias=MEME-1;ID=DARACWW-MEME-1-1-1:28187341-28187354(+);pvalue=0.00471;qvalue=0.0905;sequence=GAAACTG;
1	fimo	nucleotide_motif	28266402	28266408	23	-	.	Name=DARACWW_1:28266398-28266412(-)+;Alias=MEME-1;ID=DARACWW-MEME-1-1-1:28266398-28266412(-);pvalue=0.00506;qvalue=0.0905;sequence=TTGACTT;
1	fimo	nucleotide_motif	28276515	28276521	21.9	-	.	Name=DARACWW_1:28276510-28276523(-)+;Alias=MEME-1;ID=DARACWW-MEME-1-1-1:28276510-28276523(-);pvalue=0.00652;qvalue=0.0978;sequence=AAGATTT;
1	fimo	nucleotide_motif	28281558	28281564	23.7	-	.	Name=DARACWW_1:28281554-28281567(-)+;Alias=MEME-1;ID=DARACWW-MEME-1-1-1:28281554-28281567(-);pvalue=0.00431;qvalue=0.0905;sequence=TAAACAA;
1	fimo	nucleotide_motif	28299918	28299924	33	-	.	Name=DARACWW_1:28299914-28299927(-)+;Alias=MEME-1;ID=DARACWW-MEME-1-1-1:28299914-28299927(-);pvalue=0.0005;qvalue=0.0508;sequence=AAAACTT;
1	fimo	nucleotide_motif	28315081	28315087	23	+	.	Name=DARACWW_1:28315077-28315090(+)+;Alias=MEME-1;ID=DARACWW-MEME-1-1-1:28315077-28315090(+);pvalue=0.00506;qvalue=0.0905;sequence=AAAACAA;
1	fimo	nucleotide_motif	28328916	28328922	34	+	.	Name=DARACWW_1:28328914-28328927(+)+;Alias=MEME-1;ID=DARACWW-MEME-1-1-1:28328914-28328927(+);pvalue=0.0004;qvalue=0.0508;sequence=GAAACTT;
1	fimo	nucleotide_motif	28371247	28371253	31.9	-	.	Name=DARACWW_1:28371241-28371254(-)+;Alias=MEME-1;ID=DARACWW-MEME-1-1-1:28371241-28371254(-);pvalue=0.000651;qvalue=0.0555;sequence=GAGACAT;
1	fimo	nucleotide_motif	28402142	28402148	25.2	+	.	Name=DARACWW_1:28402135-28402149(+)+;Alias=MEME-1;ID=DARACWW-MEME-1-1-1:28402135-28402149(+);pvalue=0.003;qvalue=0.0822;sequence=TAGACAC;
1	fimo	nucleotide_motif	28415072	28415078	22.8	+	.	Name=DARACWW_1:28415066-28415079(+)+;Alias=MEME-1;ID=DARACWW-MEME-1-1-1:28415066-28415079(+);pvalue=0.0053;qvalue=0.093;sequence=CAAACTA;
1	fimo	nucleotide_motif	28422178	28422184	22.8	-	.	Name=DARACWW_1:28422174-28422187(-)+;Alias=MEME-1;ID=DARACWW-MEME-1-1-1:28422174-28422187(-);pvalue=0.0053;qvalue=0.093;sequence=AGAACAT;
1	fimo	nucleotide_motif	28446758	28446764	21.9	-	.	Name=DARACWW_1:28446753-28446766(-)+;Alias=MEME-1;ID=DARACWW-MEME-1-1-1:28446753-28446766(-);pvalue=0.00642;qvalue=0.0978;sequence=GAGATTT;
1	fimo	nucleotide_motif	28517538	28517544	22.2	+	.	Name=DARACWW_1:28517531-28517544(+)+;Alias=MEME-1;ID=DARACWW-MEME-1-1-1:28517531-28517544(+);pvalue=0.00599;qvalue=0.0965;sequence=ATGACTT;
1	fimo	nucleotide_motif	28528149	28528155	24.6	-	.	Name=DARACWW_1:28528145-28528158(-)+;Alias=MEME-1;ID=DARACWW-MEME-1-1-1:28528145-28528158(-);pvalue=0.00348;qvalue=0.0846;sequence=GAGACAC;
1	fimo	nucleotide_motif	28528378	28528384	31.3	-	.	Name=DARACWW_1:28528372-28528385(-)+;Alias=MEME-1;ID=DARACWW-MEME-1-1-1:28528372-28528385(-);pvalue=0.000737;qvalue=0.0566;sequence=AAGACAT;
1	fimo	nucleotide_motif	28537011	28537017	23	+	.	Name=DARACWW_1:28537004-28537017(+)+;Alias=MEME-1;ID=DARACWW-MEME-1-1-1:28537004-28537017(+);pvalue=0.00506;qvalue=0.0905;sequence=AAAACAA;
1	fimo	nucleotide_motif	28547957	28547963	26	-	.	Name=DARACWW_1:28547951-28547965(-)+;Alias=MEME-1;ID=DARACWW-MEME-1-1-1:28547951-28547965(-);pvalue=0.00252;qvalue=0.0778;sequence=AAAACTC;
1	fimo	nucleotide_motif	28548048	28548054	33	-	.	Name=DARACWW_1:28548044-28548057(-)+;Alias=MEME-1;ID=DARACWW-MEME-1-1-1:28548044-28548057(-);pvalue=0.0005;qvalue=0.0508;sequence=AAAACTT;
1	fimo	nucleotide_motif	28555137	28555143	27.3	-	.	Name=DARACWW_1:28555133-28555146(-)+;Alias=MEME-1;ID=DARACWW-MEME-1-1-1:28555133-28555146(-);pvalue=0.00188;qvalue=0.0756;sequence=CAAACTT;
1	fimo	nucleotide_motif	28555146	28555152	41.1	-	.	Name=DARACWW_1:28555144-28555157(-)+;Alias=MEME-1;ID=DARACWW-MEME-1-1-1:28555144-28555157(-);pvalue=7.71e-05;qvalue=0.0467;sequence=TAGACTT;
1	fimo	nucleotide_motif	28575122	28575128	23.3	-	.	Name=DARACWW_1:28575118-28575131(-)+;Alias=MEME-1;ID=DARACWW-MEME-1-1-1:28575118-28575131(-);pvalue=0.00471;qvalue=0.0905;sequence=TAAACAC;
1	fimo	nucleotide_motif	28578000	28578006	28	-	.	Name=DARACWW_1:28577996-28578009(-)+;Alias=MEME-1;ID=DARACWW-MEME-1-1-1:28577996-28578009(-);pvalue=0.00159;qvalue=0.0732;sequence=GAAACAT;
1	fimo	nucleotide_motif	28594626	28594632	36.5	+	.	Name=DARACWW_1:28594619-28594633(+)+;Alias=MEME-1;ID=DARACWW-MEME-1-1-1:28594619-28594633(+);pvalue=0.000224;qvalue=0.0467;sequence=AAGACTT;
1	fimo	nucleotide_motif	28686133	28686139	22	+	.	Name=DARACWW_1:28686128-28686141(+)+;Alias=MEME-1;ID=DARACWW-MEME-1-1-1:28686128-28686141(+);pvalue=0.00626;qvalue=0.0978;sequence=GGAACTA;
1	fimo	nucleotide_motif	28686317	28686323	27.7	-	.	Name=DARACWW_1:28686313-28686326(-)+;Alias=MEME-1;ID=DARACWW-MEME-1-1-1:28686313-28686326(-);pvalue=0.0017;qvalue=0.0732;sequence=AAAACAT;
1	fimo	nucleotide_motif	28698347	28698353	26.5	+	.	Name=DARACWW_1:28698338-28698353(+)+;Alias=MEME-1;ID=DARACWW-MEME-1-1-1:28698338-28698353(+);pvalue=0.00222;qvalue=0.0769;sequence=AAAACTA;
1	fimo	nucleotide_motif	28698368	28698374	23	+	.	Name=DARACWW_1:28698363-28698377(+)+;Alias=MEME-1;ID=DARACWW-MEME-1-1-1:28698363-28698377(+);pvalue=0.00506;qvalue=0.0905;sequence=TTGACTT;
1	fimo	nucleotide_motif	28698422	28698428	27.3	+	.	Name=DARACWW_1:28698415-28698430(+)+;Alias=MEME-1;ID=DARACWW-MEME-1-1-1:28698415-28698430(+);pvalue=0.00188;qvalue=0.0756;sequence=CAAACTT;
1	fimo	nucleotide_motif	28698558	28698564	24.8	+	.	Name=DARACWW_1:28698554-28698567(+)+;Alias=MEME-1;ID=DARACWW-MEME-1-1-1:28698554-28698567(+);pvalue=0.00328;qvalue=0.0832;sequence=GGGACAT;
1	fimo	nucleotide_motif	28708844	28708850	23	-	.	Name=DARACWW_1:28708841-28708854(-)+;Alias=MEME-1;ID=DARACWW-MEME-1-1-1:28708841-28708854(-);pvalue=0.00506;qvalue=0.0905;sequence=AAAACAA;
1	fimo	nucleotide_motif	28717354	28717360	30.2	+	.	Name=DARACWW_1:28717350-28717363(+)+;Alias=MEME-1;ID=DARACWW-MEME-1-1-1:28717350-28717363(+);pvalue=0.000945;qvalue=0.0635;sequence=TGGACTT;
1	fimo	nucleotide_motif	28802975	28802981	23	-	.	Name=DARACWW_1:28802971-28802984(-)+;Alias=MEME-1;ID=DARACWW-MEME-1-1-1:28802971-28802984(-);pvalue=0.00506;qvalue=0.0905;sequence=AAAACAA;
1	fimo	nucleotide_motif	28854504	28854510	23	-	.	Name=DARACWW_1:28854503-28854516(-)+;Alias=MEME-1;ID=DARACWW-MEME-1-1-1:28854503-28854516(-);pvalue=0.00506;qvalue=0.0905;sequence=AAAACAA;
1	fimo	nucleotide_motif	28935259	28935265	22.2	+	.	Name=DARACWW_1:28935255-28935268(+)+;Alias=MEME-1;ID=DARACWW-MEME-1-1-1:28935255-28935268(+);pvalue=0.00599;qvalue=0.0965;sequence=ATGACTT;
1	fimo	nucleotide_motif	28935328	28935334	41.1	+	.	Name=DARACWW_1:28935322-28935335(+)+;Alias=MEME-1;ID=DARACWW-MEME-1-1-1:28935322-28935335(+);pvalue=7.71e-05;qvalue=0.0467;sequence=TAGACTT;
1	fimo	nucleotide_motif	28960442	28960448	23.7	-	.	Name=DARACWW_1:28960438-28960452(-)+;Alias=MEME-1;ID=DARACWW-MEME-1-1-1:28960438-28960452(-);pvalue=0.00431;qvalue=0.0905;sequence=TAAACAA;
1	fimo	nucleotide_motif	28960513	28960519	29.3	-	.	Name=DARACWW_1:28960511-28960526(-)+;Alias=MEME-1;ID=DARACWW-MEME-1-1-1:28960511-28960526(-);pvalue=0.00116;qvalue=0.0681;sequence=AAGACTA;
1	fimo	nucleotide_motif	28978944	28978950	23.3	-	.	Name=DARACWW_1:28978940-28978953(-)+;Alias=MEME-1;ID=DARACWW-MEME-1-1-1:28978940-28978953(-);pvalue=0.00471;qvalue=0.0905;sequence=GAAACAA;
1	fimo	nucleotide_motif	28999664	28999670	27.4	-	.	Name=DARACWW_1:28999659-28999673(-)+;Alias=MEME-1;ID=DARACWW-MEME-1-1-1:28999659-28999673(-);pvalue=0.0018;qvalue=0.0746;sequence=TAAACTA;
1	fimo	nucleotide_motif	29098201	29098207	23.3	+	.	Name=DARACWW_1:29098199-29098212(+)+;Alias=MEME-1;ID=DARACWW-MEME-1-1-1:29098199-29098212(+);pvalue=0.00471;qvalue=0.0905;sequence=GAAACTG;
1	fimo	nucleotide_motif	29167595	29167601	22.2	+	.	Name=DARACWW_1:29167591-29167604(+)+;Alias=MEME-1;ID=DARACWW-MEME-1-1-1:29167591-29167604(+);pvalue=0.00599;qvalue=0.0965;sequence=AAAACCT;
1	fimo	nucleotide_motif	29207917	29207923	26	+	.	Name=DARACWW_1:29207910-29207923(+)+;Alias=MEME-1;ID=DARACWW-MEME-1-1-1:29207910-29207923(+);pvalue=0.00252;qvalue=0.0778;sequence=AAAACTC;
1	fimo	nucleotide_motif	29207934	29207940	27.7	+	.	Name=DARACWW_1:29207924-29207940(+)+;Alias=MEME-1;ID=DARACWW-MEME-1-1-1:29207924-29207940(+);pvalue=0.0017;qvalue=0.0732;sequence=AAAACAT;
1	fimo	nucleotide_motif	29270500	29270506	28	+	.	Name=DARACWW_1:29270494-29270507(+)+;Alias=MEME-1;ID=DARACWW-MEME-1-1-1:29270494-29270507(+);pvalue=0.00159;qvalue=0.0732;sequence=GAAACAT;
1	fimo	nucleotide_motif	29302553	29302559	28.2	+	.	Name=DARACWW_1:29302548-29302561(+)+;Alias=MEME-1;ID=DARACWW-MEME-1-1-1:29302548-29302561(+);pvalue=0.00151;qvalue=0.0732;sequence=TAAACAT;
1	fimo	nucleotide_motif	29304033	29304039	32.3	-	.	Name=DARACWW_1:29304029-29304042(-)+;Alias=MEME-1;ID=DARACWW-MEME-1-1-1:29304029-29304042(-);pvalue=0.000582;qvalue=0.0548;sequence=TAGACAT;
1	fimo	nucleotide_motif	29304084	29304090	30.5	-	.	Name=DARACWW_1:29304082-29304095(-)+;Alias=MEME-1;ID=DARACWW-MEME-1-1-1:29304082-29304095(-);pvalue=0.000882;qvalue=0.0619;sequence=CAGACTT;
1	fimo	nucleotide_motif	29406520	29406526	23.7	+	.	Name=DARACWW_1:29406514-29406527(+)+;Alias=MEME-1;ID=DARACWW-MEME-1-1-1:29406514-29406527(+);pvalue=0.00431;qvalue=0.0905;sequence=TAAACTG;
1	fimo	nucleotide_motif	29421779	29421785	24	+	.	Name=DARACWW_1:29421775-29421788(+)+;Alias=MEME-1;ID=DARACWW-MEME-1-1-1:29421775-29421788(+);pvalue=0.00402;qvalue=0.0901;sequence=AGGACTA;
1	fimo	nucleotide_motif	29463291	29463297	34	+	.	Name=DARACWW_1:29463289-29463302(+)+;Alias=MEME-1;ID=DARACWW-MEME-1-1-1:29463289-29463302(+);pvalue=0.0004;qvalue=0.0508;sequence=GAAACTT;
1	fimo	nucleotide_motif	29486628	29486634	24.2	-	.	Name=DARACWW_1:29486623-29486639(-)+;Alias=MEME-1;ID=DARACWW-MEME-1-1-1:29486623-29486639(-);pvalue=0.00379;qvalue=0.0872;sequence=CGGACTT;
1	fimo	nucleotide_motif	29535366	29535372	41.1	-	.	Name=DARACWW_1:29535362-29535375(-)+;Alias=MEME-1;ID=DARACWW-MEME-1-1-1:29535362-29535375(-);pvalue=7.71e-05;qvalue=0.0467;sequence=TAGACTT;
1	fimo	nucleotide_motif	29546714	29546720	21.9	-	.	Name=DARACWW_1:29546709-29546722(-)+;Alias=MEME-1;ID=DARACWW-MEME-1-1-1:29546709-29546722(-);pvalue=0.00652;qvalue=0.0978;sequence=AAGATTT;
1	fimo	nucleotide_motif	29552448	29552454	26.5	-	.	Name=DARACWW_1:29552445-29552458(-)+;Alias=MEME-1;ID=DARACWW-MEME-1-1-1:29552445-29552458(-);pvalue=0.00222;qvalue=0.0769;sequence=AAAACTA;
1	fimo	nucleotide_motif	29573799	29573805	23.3	-	.	Name=DARACWW_1:29573795-29573808(-)+;Alias=MEME-1;ID=DARACWW-MEME-1-1-1:29573795-29573808(-);pvalue=0.00471;qvalue=0.0905;sequence=TAAACAC;
1	fimo	nucleotide_motif	29577541	29577547	33	+	.	Name=DARACWW_1:29577534-29577547(+)+;Alias=MEME-1;ID=DARACWW-MEME-1-1-1:29577534-29577547(+);pvalue=0.0005;qvalue=0.0508;sequence=AAAACTT;
1	fimo	nucleotide_motif	29593349	29593355	27.7	+	.	Name=DARACWW_1:29593342-29593355(+)+;Alias=MEME-1;ID=DARACWW-MEME-1-1-1:29593342-29593355(+);pvalue=0.0017;qvalue=0.0732;sequence=AAAACAT;
1	fimo	nucleotide_motif	29593434	29593440	22.5	+	.	Name=DARACWW_1:29593429-29593442(+)+;Alias=MEME-1;ID=DARACWW-MEME-1-1-1:29593429-29593442(+);pvalue=0.00567;qvalue=0.0952;sequence=TGAACTA;
1	fimo	nucleotide_motif	29596158	29596164	27.4	+	.	Name=DARACWW_1:29596152-29596165(+)+;Alias=MEME-1;ID=DARACWW-MEME-1-1-1:29596152-29596165(+);pvalue=0.0018;qvalue=0.0746;sequence=TAAACTA;
1	fimo	nucleotide_motif	29725032	29725038	26	-	.	Name=DARACWW_1:29725028-29725041(-)+;Alias=MEME-1;ID=DARACWW-MEME-1-1-1:29725028-29725041(-);pvalue=0.00252;qvalue=0.0778;sequence=AAAACTC;
1	fimo	nucleotide_motif	29725085	29725091	28	-	.	Name=DARACWW_1:29725083-29725096(-)+;Alias=MEME-1;ID=DARACWW-MEME-1-1-1:29725083-29725096(-);pvalue=0.00159;qvalue=0.0732;sequence=GAAACAT;
1	fimo	nucleotide_motif	29736859	29736865	26	+	.	Name=DARACWW_1:29736855-29736868(+)+;Alias=MEME-1;ID=DARACWW-MEME-1-1-1:29736855-29736868(+);pvalue=0.00252;qvalue=0.0778;sequence=AAAACTC;
1	fimo	nucleotide_motif	29736865	29736871	25.6	+	.	Name=DARACWW_1:29736859-29736874(+)+;Alias=MEME-1;ID=DARACWW-MEME-1-1-1:29736859-29736874(+);pvalue=0.00274;qvalue=0.0794;sequence=CAGACAT;
1	fimo	nucleotide_motif	29736885	29736891	36.5	+	.	Name=DARACWW_1:29736879-29736892(+)+;Alias=MEME-1;ID=DARACWW-MEME-1-1-1:29736879-29736892(+);pvalue=0.000224;qvalue=0.0467;sequence=AAGACTT;
1	fimo	nucleotide_motif	29746762	29746768	23.6	+	.	Name=DARACWW_1:29746756-29746769(+)+;Alias=MEME-1;ID=DARACWW-MEME-1-1-1:29746756-29746769(+);pvalue=0.00439;qvalue=0.0905;sequence=CAAACAT;
1	fimo	nucleotide_motif	29746799	29746805	30.5	+	.	Name=DARACWW_1:29746793-29746806(+)+;Alias=MEME-1;ID=DARACWW-MEME-1-1-1:29746793-29746806(+);pvalue=0.000882;qvalue=0.0619;sequence=CAGACTT;
1	fimo	nucleotide_motif	29746835	29746841	30.5	+	.	Name=DARACWW_1:29746829-29746842(+)+;Alias=MEME-1;ID=DARACWW-MEME-1-1-1:29746829-29746842(+);pvalue=0.000882;qvalue=0.0619;sequence=CAGACTT;
1	fimo	nucleotide_motif	29796182	29796188	28.7	-	.	Name=DARACWW_1:29796180-29796193(-)+;Alias=MEME-1;ID=DARACWW-MEME-1-1-1:29796180-29796193(-);pvalue=0.00134;qvalue=0.073;sequence=GAGACTC;
1	fimo	nucleotide_motif	29796204	29796210	33	-	.	Name=DARACWW_1:29796200-29796213(-)+;Alias=MEME-1;ID=DARACWW-MEME-1-1-1:29796200-29796213(-);pvalue=0.0005;qvalue=0.0508;sequence=AAAACTT;
1	fimo	nucleotide_motif	29805653	29805659	34	-	.	Name=DARACWW_1:29805646-29805659(-)+;Alias=MEME-1;ID=DARACWW-MEME-1-1-1:29805646-29805659(-);pvalue=0.0004;qvalue=0.0508;sequence=GAAACTT;
1	fimo	nucleotide_motif	29844508	29844514	22.7	+	.	Name=DARACWW_1:29844502-29844515(+)+;Alias=MEME-1;ID=DARACWW-MEME-1-1-1:29844502-29844515(+);pvalue=0.00537;qvalue=0.0935;sequence=GAAACAC;
1	fimo	nucleotide_motif	29924169	29924175	26.1	-	.	Name=DARACWW_1:29924163-29924176(-)+;Alias=MEME-1;ID=DARACWW-MEME-1-1-1:29924163-29924176(-);pvalue=0.00244;qvalue=0.0778;sequence=GAAACTC;
1	fimo	nucleotide_motif	29924238	29924244	21.9	-	.	Name=DARACWW_1:29924233-29924246(-)+;Alias=MEME-1;ID=DARACWW-MEME-1-1-1:29924233-29924246(-);pvalue=0.00642;qvalue=0.0978;sequence=GAGATTT;
1	fimo	nucleotide_motif	29950054	29950060	24.6	-	.	Name=DARACWW_1:29950049-29950063(-)+;Alias=MEME-1;ID=DARACWW-MEME-1-1-1:29950049-29950063(-);pvalue=0.00348;qvalue=0.0846;sequence=GAGACAC;
1	fimo	nucleotide_motif	29972294	29972300	22.5	-	.	Name=DARACWW_1:29972290-29972303(-)+;Alias=MEME-1;ID=DARACWW-MEME-1-1-1:29972290-29972303(-);pvalue=0.00567;qvalue=0.0952;sequence=GTGACTT;
1	fimo	nucleotide_motif	29990191	29990197	28.5	+	.	Name=DARACWW_1:29990185-29990198(+)+;Alias=MEME-1;ID=DARACWW-MEME-1-1-1:29990185-29990198(+);pvalue=0.00141;qvalue=0.0732;sequence=AAGACTC;
1	fimo	nucleotide_motif	30007561	30007567	21.9	-	.	Name=DARACWW_1:30007556-30007569(-)+;Alias=MEME-1;ID=DARACWW-MEME-1-1-1:30007556-30007569(-);pvalue=0.00642;qvalue=0.0978;sequence=GAGATTT;
1	fimo	nucleotide_motif	30027919	30027925	21.9	-	.	Name=DARACWW_1:30027914-30027927(-)+;Alias=MEME-1;ID=DARACWW-MEME-1-1-1:30027914-30027927(-);pvalue=0.00652;qvalue=0.0978;sequence=AAGATTT;
1	fimo	nucleotide_motif	30085452	30085458	29.7	+	.	Name=DARACWW_1:30085446-30085459(+)+;Alias=MEME-1;ID=DARACWW-MEME-1-1-1:30085446-30085459(+);pvalue=0.00108;qvalue=0.0664;sequence=TAGACTC;
1	fimo	nucleotide_motif	30109302	30109308	23.6	-	.	Name=DARACWW_1:30109300-30109313(-)+;Alias=MEME-1;ID=DARACWW-MEME-1-1-1:30109300-30109313(-);pvalue=0.00439;qvalue=0.0905;sequence=CAAACAT;
1	fimo	nucleotide_motif	30156881	30156887	29.7	-	.	Name=DARACWW_1:30156877-30156890(-)+;Alias=MEME-1;ID=DARACWW-MEME-1-1-1:30156877-30156890(-);pvalue=0.00108;qvalue=0.0664;sequence=GAGACTA;
1	fimo	nucleotide_motif	30298539	30298545	33	-	.	Name=DARACWW_1:30298534-30298548(-)+;Alias=MEME-1;ID=DARACWW-MEME-1-1-1:30298534-30298548(-);pvalue=0.0005;qvalue=0.0508;sequence=AAAACTT;
1	fimo	nucleotide_motif	30320678	30320684	29.3	-	.	Name=DARACWW_1:30320674-30320687(-)+;Alias=MEME-1;ID=DARACWW-MEME-1-1-1:30320674-30320687(-);pvalue=0.00116;qvalue=0.0681;sequence=AAGACTA;
1	fimo	nucleotide_motif	30328495	30328501	25.6	+	.	Name=DARACWW_1:30328491-30328504(+)+;Alias=MEME-1;ID=DARACWW-MEME-1-1-1:30328491-30328504(+);pvalue=0.00274;qvalue=0.0794;sequence=CAGACAT;
1	fimo	nucleotide_motif	30350518	30350524	22.7	+	.	Name=DARACWW_1:30350512-30350525(+)+;Alias=MEME-1;ID=DARACWW-MEME-1-1-1:30350512-30350525(+);pvalue=0.00537;qvalue=0.0935;sequence=GAAACAC;
1	fimo	nucleotide_motif	30405745	30405751	24.1	-	.	Name=DARACWW_1:30405743-30405756(-)+;Alias=MEME-1;ID=DARACWW-MEME-1-1-1:30405743-30405756(-);pvalue=0.00384;qvalue=0.0872;sequence=CAGACTC;
2	fimo	nucleotide_motif	80991	80997	26.7	+	.	Name=DARACWW_2:80985-80998(+)+;Alias=MEME-1;ID=DARACWW-MEME-1-1-2:80985-80998(+);pvalue=0.00212;qvalue=0.0766;sequence=GAAACTA;
2	fimo	nucleotide_motif	81006	81012	21.8	+	.	Name=DARACWW_2:81000-81013(+)+;Alias=MEME-1;ID=DARACWW-MEME-1-1-2:81000-81013(+);pvalue=0.00665;qvalue=0.0986;sequence=AAGACAG;
2	fimo	nucleotide_motif	94861	94867	27.7	-	.	Name=DARACWW_2:94857-94870(-)+;Alias=MEME-1;ID=DARACWW-MEME-1-1-2:94857-94870(-);pvalue=0.0017;qvalue=0.0732;sequence=AAAACAT;
2	fimo	nucleotide_motif	94910	94916	21.8	-	.	Name=DARACWW_2:94907-94920(-)+;Alias=MEME-1;ID=DARACWW-MEME-1-1-2:94907-94920(-);pvalue=0.00665;qvalue=0.0986;sequence=AAGACAG;
2	fimo	nucleotide_motif	126248	126254	24.9	+	.	Name=DARACWW_2:126241-126255(+)+;Alias=MEME-1;ID=DARACWW-MEME-1-1-2:126241-126255(+);pvalue=0.00323;qvalue=0.0822;sequence=AAGACAA;
2	fimo	nucleotide_motif	132853	132859	31.3	-	.	Name=DARACWW_2:132849-132862(-)+;Alias=MEME-1;ID=DARACWW-MEME-1-1-2:132849-132862(-);pvalue=0.000737;qvalue=0.0566;sequence=AAGACAT;
2	fimo	nucleotide_motif	132916	132922	27.3	-	.	Name=DARACWW_2:132909-132922(-)+;Alias=MEME-1;ID=DARACWW-MEME-1-1-2:132909-132922(-);pvalue=0.00188;qvalue=0.0756;sequence=CAAACTT;
2	fimo	nucleotide_motif	142320	142326	24.6	+	.	Name=DARACWW_2:142316-142331(+)+;Alias=MEME-1;ID=DARACWW-MEME-1-1-2:142316-142331(+);pvalue=0.00348;qvalue=0.0846;sequence=GAGACAC;
2	fimo	nucleotide_motif	154417	154423	28.5	-	.	Name=DARACWW_2:154410-154423(-)+;Alias=MEME-1;ID=DARACWW-MEME-1-1-2:154410-154423(-);pvalue=0.00141;qvalue=0.0732;sequence=AAGACTC;
2	fimo	nucleotide_motif	223259	223265	21.9	+	.	Name=DARACWW_2:223254-223267(+)+;Alias=MEME-1;ID=DARACWW-MEME-1-1-2:223254-223267(+);pvalue=0.00642;qvalue=0.0978;sequence=AGAACTA;
2	fimo	nucleotide_motif	223369	223375	22.1	+	.	Name=DARACWW_2:223363-223376(+)+;Alias=MEME-1;ID=DARACWW-MEME-1-1-2:223363-223376(+);pvalue=0.00612;qvalue=0.0968;sequence=CAAACTC;
2	fimo	nucleotide_motif	316945	316951	28	+	.	Name=DARACWW_2:316939-316952(+)+;Alias=MEME-1;ID=DARACWW-MEME-1-1-2:316939-316952(+);pvalue=0.00159;qvalue=0.0732;sequence=GAAACAT;
2	fimo	nucleotide_motif	317111	317117	35	-	.	Name=DARACWW_2:317107-317120(-)+;Alias=MEME-1;ID=DARACWW-MEME-1-1-2:317107-317120(-);pvalue=0.000319;qvalue=0.0508;sequence=TAAACTT;
2	fimo	nucleotide_motif	317154	317160	29.7	-	.	Name=DARACWW_2:317152-317165(-)+;Alias=MEME-1;ID=DARACWW-MEME-1-1-2:317152-317165(-);pvalue=0.00108;qvalue=0.0664;sequence=TAGACTC;
2	fimo	nucleotide_motif	357546	357552	22.2	-	.	Name=DARACWW_2:357542-357555(-)+;Alias=MEME-1;ID=DARACWW-MEME-1-1-2:357542-357555(-);pvalue=0.00599;qvalue=0.0965;sequence=ATGACTT;
2	fimo	nucleotide_motif	452088	452094	23.3	-	.	Name=DARACWW_2:452084-452097(-)+;Alias=MEME-1;ID=DARACWW-MEME-1-1-2:452084-452097(-);pvalue=0.00471;qvalue=0.0905;sequence=GAAACTG;
2	fimo	nucleotide_motif	491930	491936	26	+	.	Name=DARACWW_2:491928-491941(+)+;Alias=MEME-1;ID=DARACWW-MEME-1-1-2:491928-491941(+);pvalue=0.00252;qvalue=0.0778;sequence=AAAACTC;
2	fimo	nucleotide_motif	526949	526955	28.2	+	.	Name=DARACWW_2:526943-526956(+)+;Alias=MEME-1;ID=DARACWW-MEME-1-1-2:526943-526956(+);pvalue=0.00151;qvalue=0.0732;sequence=TAAACAT;
2	fimo	nucleotide_motif	526976	526982	41.1	+	.	Name=DARACWW_2:526970-526983(+)+;Alias=MEME-1;ID=DARACWW-MEME-1-1-2:526970-526983(+);pvalue=7.71e-05;qvalue=0.0467;sequence=TAGACTT;
2	fimo	nucleotide_motif	553205	553211	23.3	-	.	Name=DARACWW_2:553201-553214(-)+;Alias=MEME-1;ID=DARACWW-MEME-1-1-2:553201-553214(-);pvalue=0.00471;qvalue=0.0905;sequence=GAAACAA;
2	fimo	nucleotide_motif	654718	654724	29.1	+	.	Name=DARACWW_2:654714-654727(+)+;Alias=MEME-1;ID=DARACWW-MEME-1-1-2:654714-654727(+);pvalue=0.00122;qvalue=0.0702;sequence=GGGACTT;
2	fimo	nucleotide_motif	654782	654788	29.7	+	.	Name=DARACWW_2:654778-654791(+)+;Alias=MEME-1;ID=DARACWW-MEME-1-1-2:654778-654791(+);pvalue=0.00108;qvalue=0.0664;sequence=GAGACTA;
2	fimo	nucleotide_motif	674598	674604	24.9	+	.	Name=DARACWW_2:674590-674605(+)+;Alias=MEME-1;ID=DARACWW-MEME-1-1-2:674590-674605(+);pvalue=0.00323;qvalue=0.0822;sequence=AAGACAA;
2	fimo	nucleotide_motif	674604	674610	28.5	+	.	Name=DARACWW_2:674598-674611(+)+;Alias=MEME-1;ID=DARACWW-MEME-1-1-2:674598-674611(+);pvalue=0.00141;qvalue=0.0732;sequence=AAGACTC;
2	fimo	nucleotide_motif	775187	775193	23	+	.	Name=DARACWW_2:775181-775196(+)+;Alias=MEME-1;ID=DARACWW-MEME-1-1-2:775181-775196(+);pvalue=0.00506;qvalue=0.0905;sequence=TAAACCT;
2	fimo	nucleotide_motif	775280	775286	22.1	+	.	Name=DARACWW_2:775274-775288(+)+;Alias=MEME-1;ID=DARACWW-MEME-1-1-2:775274-775288(+);pvalue=0.00612;qvalue=0.0968;sequence=CAAACTC;
2	fimo	nucleotide_motif	940226	940232	27.3	+	.	Name=DARACWW_2:940223-940236(+)+;Alias=MEME-1;ID=DARACWW-MEME-1-1-2:940223-940236(+);pvalue=0.00188;qvalue=0.0756;sequence=CAAACTT;
2	fimo	nucleotide_motif	940243	940249	36.5	+	.	Name=DARACWW_2:940236-940250(+)+;Alias=MEME-1;ID=DARACWW-MEME-1-1-2:940236-940250(+);pvalue=0.000224;qvalue=0.0467;sequence=AAGACTT;
2	fimo	nucleotide_motif	959005	959011	23	+	.	Name=DARACWW_2:958998-959011(+)+;Alias=MEME-1;ID=DARACWW-MEME-1-1-2:958998-959011(+);pvalue=0.00506;qvalue=0.0905;sequence=AAAACAA;
2	fimo	nucleotide_motif	1006406	1006412	25.6	-	.	Name=DARACWW_2:1006402-1006415(-)+;Alias=MEME-1;ID=DARACWW-MEME-1-1-2:1006402-1006415(-);pvalue=0.00274;qvalue=0.0794;sequence=CAGACAT;
2	fimo	nucleotide_motif	1030453	1030459	23.3	-	.	Name=DARACWW_2:1030449-1030462(-)+;Alias=MEME-1;ID=DARACWW-MEME-1-1-2:1030449-1030462(-);pvalue=0.00471;qvalue=0.0905;sequence=GAAACAA;
2	fimo	nucleotide_motif	1068956	1068962	23	+	.	Name=DARACWW_2:1068949-1068962(+)+;Alias=MEME-1;ID=DARACWW-MEME-1-1-2:1068949-1068962(+);pvalue=0.00506;qvalue=0.0905;sequence=AAAACAA;
2	fimo	nucleotide_motif	1104456	1104462	23	-	.	Name=DARACWW_2:1104452-1104465(-)+;Alias=MEME-1;ID=DARACWW-MEME-1-1-2:1104452-1104465(-);pvalue=0.00506;qvalue=0.0905;sequence=AAAACAA;
2	fimo	nucleotide_motif	1121861	1121867	24.2	+	.	Name=DARACWW_2:1121855-1121868(+)+;Alias=MEME-1;ID=DARACWW-MEME-1-1-2:1121855-1121868(+);pvalue=0.00379;qvalue=0.0872;sequence=AAGACCT;
2	fimo	nucleotide_motif	1121905	1121911	23.3	+	.	Name=DARACWW_2:1121899-1121912(+)+;Alias=MEME-1;ID=DARACWW-MEME-1-1-2:1121899-1121912(+);pvalue=0.00471;qvalue=0.0905;sequence=GAAACTG;
2	fimo	nucleotide_motif	1121998	1122004	33	+	.	Name=DARACWW_2:1121996-1122010(+)+;Alias=MEME-1;ID=DARACWW-MEME-1-1-2:1121996-1122010(+);pvalue=0.0005;qvalue=0.0508;sequence=AAAACTT;
2	fimo	nucleotide_motif	1152553	1152559	36.5	-	.	Name=DARACWW_2:1152551-1152565(-)+;Alias=MEME-1;ID=DARACWW-MEME-1-1-2:1152551-1152565(-);pvalue=0.000224;qvalue=0.0467;sequence=AAGACTT;
2	fimo	nucleotide_motif	1165066	1165072	24.9	-	.	Name=DARACWW_2:1165062-1165075(-)+;Alias=MEME-1;ID=DARACWW-MEME-1-1-2:1165062-1165075(-);pvalue=0.00323;qvalue=0.0822;sequence=TAGACCT;
2	fimo	nucleotide_motif	1181256	1181262	36.5	+	.	Name=DARACWW_2:1181249-1181263(+)+;Alias=MEME-1;ID=DARACWW-MEME-1-1-2:1181249-1181263(+);pvalue=0.000224;qvalue=0.0467;sequence=AAGACTT;
2	fimo	nucleotide_motif	1181344	1181350	28	+	.	Name=DARACWW_2:1181338-1181351(+)+;Alias=MEME-1;ID=DARACWW-MEME-1-1-2:1181338-1181351(+);pvalue=0.00159;qvalue=0.0732;sequence=GAAACAT;
2	fimo	nucleotide_motif	1181363	1181369	23.7	+	.	Name=DARACWW_2:1181357-1181370(+)+;Alias=MEME-1;ID=DARACWW-MEME-1-1-2:1181357-1181370(+);pvalue=0.00431;qvalue=0.0905;sequence=TAAACAA;
2	fimo	nucleotide_motif	1286022	1286028	21.9	+	.	Name=DARACWW_2:1286019-1286032(+)+;Alias=MEME-1;ID=DARACWW-MEME-1-1-2:1286019-1286032(+);pvalue=0.00642;qvalue=0.0978;sequence=GAGATTT;
2	fimo	nucleotide_motif	1334486	1334492	33	+	.	Name=DARACWW_2:1334484-1334497(+)+;Alias=MEME-1;ID=DARACWW-MEME-1-1-2:1334484-1334497(+);pvalue=0.0005;qvalue=0.0508;sequence=AAAACTT;
2	fimo	nucleotide_motif	1334521	1334527	23	+	.	Name=DARACWW_2:1334514-1334527(+)+;Alias=MEME-1;ID=DARACWW-MEME-1-1-2:1334514-1334527(+);pvalue=0.00506;qvalue=0.0905;sequence=AAAACAA;
2	fimo	nucleotide_motif	1480152	1480158	30.9	-	.	Name=DARACWW_2:1480148-1480161(-)+;Alias=MEME-1;ID=DARACWW-MEME-1-1-2:1480148-1480161(-);pvalue=0.000818;qvalue=0.0606;sequence=TAGACTA;
2	fimo	nucleotide_motif	1480160	1480166	22.5	-	.	Name=DARACWW_2:1480156-1480169(-)+;Alias=MEME-1;ID=DARACWW-MEME-1-1-2:1480156-1480169(-);pvalue=0.00567;qvalue=0.0952;sequence=GTGACTT;
2	fimo	nucleotide_motif	1519189	1519195	30.2	+	.	Name=DARACWW_2:1519185-1519198(+)+;Alias=MEME-1;ID=DARACWW-MEME-1-1-2:1519185-1519198(+);pvalue=0.000945;qvalue=0.0635;sequence=TGGACTT;
2	fimo	nucleotide_motif	1519200	1519206	22.1	+	.	Name=DARACWW_2:1519198-1519211(+)+;Alias=MEME-1;ID=DARACWW-MEME-1-1-2:1519198-1519211(+);pvalue=0.00612;qvalue=0.0968;sequence=CAAACTC;
2	fimo	nucleotide_motif	1528378	1528384	36.5	+	.	Name=DARACWW_2:1528372-1528385(+)+;Alias=MEME-1;ID=DARACWW-MEME-1-1-2:1528372-1528385(+);pvalue=0.000224;qvalue=0.0467;sequence=AAGACTT;
2	fimo	nucleotide_motif	1528419	1528425	26.7	+	.	Name=DARACWW_2:1528412-1528427(+)+;Alias=MEME-1;ID=DARACWW-MEME-1-1-2:1528412-1528427(+);pvalue=0.00212;qvalue=0.0766;sequence=TAAACTC;
2	fimo	nucleotide_motif	1528431	1528437	28.7	+	.	Name=DARACWW_2:1528425-1528438(+)+;Alias=MEME-1;ID=DARACWW-MEME-1-1-2:1528425-1528438(+);pvalue=0.00134;qvalue=0.073;sequence=GAGACTC;
2	fimo	nucleotide_motif	1533655	1533661	29.3	+	.	Name=DARACWW_2:1533651-1533664(+)+;Alias=MEME-1;ID=DARACWW-MEME-1-1-2:1533651-1533664(+);pvalue=0.00116;qvalue=0.0681;sequence=AAGACTA;
2	fimo	nucleotide_motif	1533687	1533693	31.3	+	.	Name=DARACWW_2:1533680-1533694(+)+;Alias=MEME-1;ID=DARACWW-MEME-1-1-2:1533680-1533694(+);pvalue=0.000737;qvalue=0.0566;sequence=AAGACAT;
2	fimo	nucleotide_motif	1574743	1574749	22.2	-	.	Name=DARACWW_2:1574738-1574752(-)+;Alias=MEME-1;ID=DARACWW-MEME-1-1-2:1574738-1574752(-);pvalue=0.00599;qvalue=0.0965;sequence=ATGACTT;
2	fimo	nucleotide_motif	1619087	1619093	26.2	-	.	Name=DARACWW_2:1619080-1619093(-)+;Alias=MEME-1;ID=DARACWW-MEME-1-1-2:1619080-1619093(-);pvalue=0.00237;qvalue=0.0778;sequence=AGAACTT;
2	fimo	nucleotide_motif	1720291	1720297	25.7	+	.	Name=DARACWW_2:1720287-1720300(+)+;Alias=MEME-1;ID=DARACWW-MEME-1-1-2:1720287-1720300(+);pvalue=0.00267;qvalue=0.0794;sequence=TAGACTG;
2	fimo	nucleotide_motif	1799331	1799337	29.1	-	.	Name=DARACWW_2:1799327-1799340(-)+;Alias=MEME-1;ID=DARACWW-MEME-1-1-2:1799327-1799340(-);pvalue=0.00122;qvalue=0.0702;sequence=GGGACTT;
2	fimo	nucleotide_motif	1894637	1894643	28.7	-	.	Name=DARACWW_2:1894632-1894646(-)+;Alias=MEME-1;ID=DARACWW-MEME-1-1-2:1894632-1894646(-);pvalue=0.00134;qvalue=0.073;sequence=GAGACTC;
2	fimo	nucleotide_motif	1894649	1894655	26.7	-	.	Name=DARACWW_2:1894645-1894660(-)+;Alias=MEME-1;ID=DARACWW-MEME-1-1-2:1894645-1894660(-);pvalue=0.00212;qvalue=0.0766;sequence=TAAACTC;
2	fimo	nucleotide_motif	1894690	1894696	36.5	-	.	Name=DARACWW_2:1894686-1894699(-)+;Alias=MEME-1;ID=DARACWW-MEME-1-1-2:1894686-1894699(-);pvalue=0.000224;qvalue=0.0467;sequence=AAGACTT;
2	fimo	nucleotide_motif	1933338	1933344	28.2	-	.	Name=DARACWW_2:1933334-1933349(-)+;Alias=MEME-1;ID=DARACWW-MEME-1-1-2:1933334-1933349(-);pvalue=0.00151;qvalue=0.0732;sequence=TAAACAT;
2	fimo	nucleotide_motif	2201394	2201400	22.2	+	.	Name=DARACWW_2:2201386-2201400(+)+;Alias=MEME-1;ID=DARACWW-MEME-1-1-2:2201386-2201400(+);pvalue=0.00599;qvalue=0.0965;sequence=ATGACTT;
2	fimo	nucleotide_motif	2236078	2236084	29.1	+	.	Name=DARACWW_2:2236074-2236087(+)+;Alias=MEME-1;ID=DARACWW-MEME-1-1-2:2236074-2236087(+);pvalue=0.00122;qvalue=0.0702;sequence=GGGACTT;
2	fimo	nucleotide_motif	2861872	2861878	24.9	-	.	Name=DARACWW_2:2861868-2861883(-)+;Alias=MEME-1;ID=DARACWW-MEME-1-1-2:2861868-2861883(-);pvalue=0.00323;qvalue=0.0822;sequence=TAGACCT;
2	fimo	nucleotide_motif	2930508	2930514	25.6	+	.	Name=DARACWW_2:2930502-2930515(+)+;Alias=MEME-1;ID=DARACWW-MEME-1-1-2:2930502-2930515(+);pvalue=0.00274;qvalue=0.0794;sequence=CAGACAT;
2	fimo	nucleotide_motif	2981044	2981050	25.2	-	.	Name=DARACWW_2:2981040-2981053(-)+;Alias=MEME-1;ID=DARACWW-MEME-1-1-2:2981040-2981053(-);pvalue=0.003;qvalue=0.0822;sequence=GAGACTG;
2	fimo	nucleotide_motif	2981077	2981083	28.5	-	.	Name=DARACWW_2:2981075-2981088(-)+;Alias=MEME-1;ID=DARACWW-MEME-1-1-2:2981075-2981088(-);pvalue=0.00141;qvalue=0.0732;sequence=AAGACTC;
2	fimo	nucleotide_motif	3781946	3781952	30.2	+	.	Name=DARACWW_2:3781942-3781955(+)+;Alias=MEME-1;ID=DARACWW-MEME-1-1-2:3781942-3781955(+);pvalue=0.000945;qvalue=0.0635;sequence=TGGACTT;
2	fimo	nucleotide_motif	3781955	3781961	28.7	+	.	Name=DARACWW_2:3781949-3781962(+)+;Alias=MEME-1;ID=DARACWW-MEME-1-1-2:3781949-3781962(+);pvalue=0.00134;qvalue=0.073;sequence=GAGACTC;
2	fimo	nucleotide_motif	4805770	4805776	33	-	.	Name=DARACWW_2:4805766-4805779(-)+;Alias=MEME-1;ID=DARACWW-MEME-1-1-2:4805766-4805779(-);pvalue=0.0005;qvalue=0.0508;sequence=AAAACTT;
2	fimo	nucleotide_motif	5539293	5539299	27.3	-	.	Name=DARACWW_2:5539286-5539300(-)+;Alias=MEME-1;ID=DARACWW-MEME-1-1-2:5539286-5539300(-);pvalue=0.00188;qvalue=0.0756;sequence=CAAACTT;
2	fimo	nucleotide_motif	5539367	5539373	22.1	-	.	Name=DARACWW_2:5539360-5539374(-)+;Alias=MEME-1;ID=DARACWW-MEME-1-1-2:5539360-5539374(-);pvalue=0.00612;qvalue=0.0968;sequence=CAAACTC;
2	fimo	nucleotide_motif	5539371	5539377	23.7	-	.	Name=DARACWW_2:5539363-5539377(-)+;Alias=MEME-1;ID=DARACWW-MEME-1-1-2:5539363-5539377(-);pvalue=0.00431;qvalue=0.0905;sequence=TAAACAA;
2	fimo	nucleotide_motif	5977719	5977725	24.3	-	.	Name=DARACWW_2:5977715-5977728(-)+;Alias=MEME-1;ID=DARACWW-MEME-1-1-2:5977715-5977728(-);pvalue=0.00367;qvalue=0.0857;sequence=GAGACCT;
2	fimo	nucleotide_motif	6052525	6052531	23.7	-	.	Name=DARACWW_2:6052521-6052534(-)+;Alias=MEME-1;ID=DARACWW-MEME-1-1-2:6052521-6052534(-);pvalue=0.00431;qvalue=0.0905;sequence=TAAACAA;
2	fimo	nucleotide_motif	6300692	6300698	34	-	.	Name=DARACWW_2:6300686-6300699(-)+;Alias=MEME-1;ID=DARACWW-MEME-1-1-2:6300686-6300699(-);pvalue=0.0004;qvalue=0.0508;sequence=GAAACTT;
2	fimo	nucleotide_motif	6300709	6300715	22.5	-	.	Name=DARACWW_2:6300704-6300718(-)+;Alias=MEME-1;ID=DARACWW-MEME-1-1-2:6300704-6300718(-);pvalue=0.00567;qvalue=0.0952;sequence=GTGACTT;
2	fimo	nucleotide_motif	6312503	6312509	29.1	+	.	Name=DARACWW_2:6312499-6312512(+)+;Alias=MEME-1;ID=DARACWW-MEME-1-1-2:6312499-6312512(+);pvalue=0.00122;qvalue=0.0702;sequence=GGGACTT;
2	fimo	nucleotide_motif	6312550	6312556	24.9	+	.	Name=DARACWW_2:6312544-6312557(+)+;Alias=MEME-1;ID=DARACWW-MEME-1-1-2:6312544-6312557(+);pvalue=0.00323;qvalue=0.0822;sequence=AAGACAA;
2	fimo	nucleotide_motif	6393584	6393590	36.5	-	.	Name=DARACWW_2:6393578-6393591(-)+;Alias=MEME-1;ID=DARACWW-MEME-1-1-2:6393578-6393591(-);pvalue=0.000224;qvalue=0.0467;sequence=AAGACTT;
2	fimo	nucleotide_motif	6480938	6480944	23.3	-	.	Name=DARACWW_2:6480934-6480947(-)+;Alias=MEME-1;ID=DARACWW-MEME-1-1-2:6480934-6480947(-);pvalue=0.00471;qvalue=0.0905;sequence=GAAACAA;
2	fimo	nucleotide_motif	6615794	6615800	28.2	-	.	Name=DARACWW_2:6615788-6615801(-)+;Alias=MEME-1;ID=DARACWW-MEME-1-1-2:6615788-6615801(-);pvalue=0.00151;qvalue=0.0732;sequence=TAAACAT;
2	fimo	nucleotide_motif	6812728	6812734	30.5	+	.	Name=DARACWW_2:6812722-6812735(+)+;Alias=MEME-1;ID=DARACWW-MEME-1-1-2:6812722-6812735(+);pvalue=0.000882;qvalue=0.0619;sequence=CAGACTT;
2	fimo	nucleotide_motif	6833995	6834001	32.3	-	.	Name=DARACWW_2:6833991-6834004(-)+;Alias=MEME-1;ID=DARACWW-MEME-1-1-2:6833991-6834004(-);pvalue=0.000582;qvalue=0.0548;sequence=TAGACAT;
2	fimo	nucleotide_motif	7150668	7150674	22.1	-	.	Name=DARACWW_2:7150662-7150675(-)+;Alias=MEME-1;ID=DARACWW-MEME-1-1-2:7150662-7150675(-);pvalue=0.00612;qvalue=0.0968;sequence=CAAACTC;
2	fimo	nucleotide_motif	7150672	7150678	24.9	-	.	Name=DARACWW_2:7150670-7150683(-)+;Alias=MEME-1;ID=DARACWW-MEME-1-1-2:7150670-7150683(-);pvalue=0.00323;qvalue=0.0822;sequence=AAGACAA;
2	fimo	nucleotide_motif	7159764	7159770	27.1	-	.	Name=DARACWW_2:7159760-7159773(-)+;Alias=MEME-1;ID=DARACWW-MEME-1-1-2:7159760-7159773(-);pvalue=0.00195;qvalue=0.0766;sequence=TGAACTT;
2	fimo	nucleotide_motif	7201505	7201511	34	+	.	Name=DARACWW_2:7201499-7201512(+)+;Alias=MEME-1;ID=DARACWW-MEME-1-1-2:7201499-7201512(+);pvalue=0.0004;qvalue=0.0508;sequence=GAAACTT;
2	fimo	nucleotide_motif	7281542	7281548	24.9	-	.	Name=DARACWW_2:7281540-7281553(-)+;Alias=MEME-1;ID=DARACWW-MEME-1-1-2:7281540-7281553(-);pvalue=0.00323;qvalue=0.0822;sequence=AAGACAA;
2	fimo	nucleotide_motif	7304080	7304086	27.4	-	.	Name=DARACWW_2:7304076-7304089(-)+;Alias=MEME-1;ID=DARACWW-MEME-1-1-2:7304076-7304089(-);pvalue=0.0018;qvalue=0.0746;sequence=TAAACTA;
2	fimo	nucleotide_motif	7342647	7342653	23	-	.	Name=DARACWW_2:7342643-7342656(-)+;Alias=MEME-1;ID=DARACWW-MEME-1-1-2:7342643-7342656(-);pvalue=0.00506;qvalue=0.0905;sequence=TTGACTT;
2	fimo	nucleotide_motif	7342667	7342673	22.2	-	.	Name=DARACWW_2:7342662-7342675(-)+;Alias=MEME-1;ID=DARACWW-MEME-1-1-2:7342662-7342675(-);pvalue=0.00599;qvalue=0.0965;sequence=TAGATTT;
2	fimo	nucleotide_motif	7519469	7519475	24	+	.	Name=DARACWW_2:7519465-7519478(+)+;Alias=MEME-1;ID=DARACWW-MEME-1-1-2:7519465-7519478(+);pvalue=0.00402;qvalue=0.0901;sequence=AGGACTA;
2	fimo	nucleotide_motif	7541499	7541505	23.3	-	.	Name=DARACWW_2:7541495-7541508(-)+;Alias=MEME-1;ID=DARACWW-MEME-1-1-2:7541495-7541508(-);pvalue=0.00471;qvalue=0.0905;sequence=GAAACAA;
2	fimo	nucleotide_motif	7548221	7548227	33	+	.	Name=DARACWW_2:7548214-7548227(+)+;Alias=MEME-1;ID=DARACWW-MEME-1-1-2:7548214-7548227(+);pvalue=0.0005;qvalue=0.0508;sequence=AAAACTT;
2	fimo	nucleotide_motif	7554916	7554922	23.3	+	.	Name=DARACWW_2:7554910-7554923(+)+;Alias=MEME-1;ID=DARACWW-MEME-1-1-2:7554910-7554923(+);pvalue=0.00471;qvalue=0.0905;sequence=GAAACAA;
2	fimo	nucleotide_motif	7563703	7563709	23	+	.	Name=DARACWW_2:7563699-7563712(+)+;Alias=MEME-1;ID=DARACWW-MEME-1-1-2:7563699-7563712(+);pvalue=0.00506;qvalue=0.0905;sequence=TAAACCT;
2	fimo	nucleotide_motif	7566424	7566430	21.9	+	.	Name=DARACWW_2:7566421-7566434(+)+;Alias=MEME-1;ID=DARACWW-MEME-1-1-2:7566421-7566434(+);pvalue=0.00652;qvalue=0.0978;sequence=AAGATTT;
2	fimo	nucleotide_motif	7566445	7566451	28.9	+	.	Name=DARACWW_2:7566441-7566454(+)+;Alias=MEME-1;ID=DARACWW-MEME-1-1-2:7566441-7566454(+);pvalue=0.00128;qvalue=0.0722;sequence=AGGACTT;
2	fimo	nucleotide_motif	7642412	7642418	33	-	.	Name=DARACWW_2:7642409-7642422(-)+;Alias=MEME-1;ID=DARACWW-MEME-1-1-2:7642409-7642422(-);pvalue=0.0005;qvalue=0.0508;sequence=AAAACTT;
2	fimo	nucleotide_motif	7684181	7684187	23.3	-	.	Name=DARACWW_2:7684177-7684190(-)+;Alias=MEME-1;ID=DARACWW-MEME-1-1-2:7684177-7684190(-);pvalue=0.00471;qvalue=0.0905;sequence=TAAACAC;
2	fimo	nucleotide_motif	7742017	7742023	22.5	+	.	Name=DARACWW_2:7742011-7742024(+)+;Alias=MEME-1;ID=DARACWW-MEME-1-1-2:7742011-7742024(+);pvalue=0.00567;qvalue=0.0952;sequence=AAAACAC;
2	fimo	nucleotide_motif	7755838	7755844	27.4	-	.	Name=DARACWW_2:7755834-7755847(-)+;Alias=MEME-1;ID=DARACWW-MEME-1-1-2:7755834-7755847(-);pvalue=0.0018;qvalue=0.0746;sequence=TAAACTA;
2	fimo	nucleotide_motif	7764237	7764243	23	-	.	Name=DARACWW_2:7764234-7764247(-)+;Alias=MEME-1;ID=DARACWW-MEME-1-1-2:7764234-7764247(-);pvalue=0.00506;qvalue=0.0905;sequence=TAAACCT;
2	fimo	nucleotide_motif	7838252	7838258	21.9	+	.	Name=DARACWW_2:7838246-7838259(+)+;Alias=MEME-1;ID=DARACWW-MEME-1-1-2:7838246-7838259(+);pvalue=0.00652;qvalue=0.0978;sequence=AAGATTT;
2	fimo	nucleotide_motif	7838265	7838271	23	+	.	Name=DARACWW_2:7838259-7838278(+)+;Alias=MEME-1;ID=DARACWW-MEME-1-1-2:7838259-7838278(+);pvalue=0.00506;qvalue=0.0905;sequence=TAAACCT;
2	fimo	nucleotide_motif	7843698	7843704	23.6	+	.	Name=DARACWW_2:7843691-7843707(+)+;Alias=MEME-1;ID=DARACWW-MEME-1-1-2:7843691-7843707(+);pvalue=0.00439;qvalue=0.0905;sequence=CAAACAT;
2	fimo	nucleotide_motif	7873844	7873850	24.9	+	.	Name=DARACWW_2:7873840-7873853(+)+;Alias=MEME-1;ID=DARACWW-MEME-1-1-2:7873840-7873853(+);pvalue=0.00323;qvalue=0.0822;sequence=AAGACAA;
2	fimo	nucleotide_motif	7948297	7948303	22.5	+	.	Name=DARACWW_2:7948292-7948306(+)+;Alias=MEME-1;ID=DARACWW-MEME-1-1-2:7948292-7948306(+);pvalue=0.00567;qvalue=0.0952;sequence=TGAACTA;
2	fimo	nucleotide_motif	7989477	7989483	25.7	+	.	Name=DARACWW_2:7989471-7989484(+)+;Alias=MEME-1;ID=DARACWW-MEME-1-1-2:7989471-7989484(+);pvalue=0.00267;qvalue=0.0794;sequence=TAGACAA;
2	fimo	nucleotide_motif	7989551	7989557	31.9	-	.	Name=DARACWW_2:7989549-7989562(-)+;Alias=MEME-1;ID=DARACWW-MEME-1-1-2:7989549-7989562(-);pvalue=0.000651;qvalue=0.0555;sequence=GAGACAT;
2	fimo	nucleotide_motif	7989620	7989626	25.2	-	.	Name=DARACWW_2:7989613-7989626(-)+;Alias=MEME-1;ID=DARACWW-MEME-1-1-2:7989613-7989626(-);pvalue=0.003;qvalue=0.0822;sequence=GAGACAA;
2	fimo	nucleotide_motif	7996611	7996617	23	-	.	Name=DARACWW_2:7996608-7996622(-)+;Alias=MEME-1;ID=DARACWW-MEME-1-1-2:7996608-7996622(-);pvalue=0.00506;qvalue=0.0905;sequence=AAAACTG;
2	fimo	nucleotide_motif	8112145	8112151	35	-	.	Name=DARACWW_2:8112139-8112152(-)+;Alias=MEME-1;ID=DARACWW-MEME-1-1-2:8112139-8112152(-);pvalue=0.000319;qvalue=0.0508;sequence=TAAACTT;
2	fimo	nucleotide_motif	8124886	8124892	33	+	.	Name=DARACWW_2:8124884-8124898(+)+;Alias=MEME-1;ID=DARACWW-MEME-1-1-2:8124884-8124898(+);pvalue=0.0005;qvalue=0.0508;sequence=AAAACTT;
2	fimo	nucleotide_motif	8144333	8144339	36.5	+	.	Name=DARACWW_2:8144326-8144340(+)+;Alias=MEME-1;ID=DARACWW-MEME-1-1-2:8144326-8144340(+);pvalue=0.000224;qvalue=0.0467;sequence=AAGACTT;
2	fimo	nucleotide_motif	8165809	8165815	28	+	.	Name=DARACWW_2:8165803-8165816(+)+;Alias=MEME-1;ID=DARACWW-MEME-1-1-2:8165803-8165816(+);pvalue=0.00159;qvalue=0.0732;sequence=GAAACAT;
2	fimo	nucleotide_motif	8227379	8227385	21.7	+	.	Name=DARACWW_2:8227374-8227387(+)+;Alias=MEME-1;ID=DARACWW-MEME-1-1-2:8227374-8227387(+);pvalue=0.00677;qvalue=0.0998;sequence=AGAACTC;
2	fimo	nucleotide_motif	8227450	8227456	26	+	.	Name=DARACWW_2:8227446-8227459(+)+;Alias=MEME-1;ID=DARACWW-MEME-1-1-2:8227446-8227459(+);pvalue=0.00252;qvalue=0.0778;sequence=AAAACTC;
2	fimo	nucleotide_motif	8227516	8227522	25.2	+	.	Name=DARACWW_2:8227512-8227525(+)+;Alias=MEME-1;ID=DARACWW-MEME-1-1-2:8227512-8227525(+);pvalue=0.003;qvalue=0.0822;sequence=GAGACAA;
2	fimo	nucleotide_motif	8325819	8325825	23	+	.	Name=DARACWW_2:8325813-8325826(+)+;Alias=MEME-1;ID=DARACWW-MEME-1-1-2:8325813-8325826(+);pvalue=0.00506;qvalue=0.0905;sequence=TTGACTT;
2	fimo	nucleotide_motif	8459277	8459283	27.4	+	.	Name=DARACWW_2:8459271-8459284(+)+;Alias=MEME-1;ID=DARACWW-MEME-1-1-2:8459271-8459284(+);pvalue=0.0018;qvalue=0.0746;sequence=TAAACTA;
2	fimo	nucleotide_motif	8459412	8459418	24.1	+	.	Name=DARACWW_2:8459406-8459419(+)+;Alias=MEME-1;ID=DARACWW-MEME-1-1-2:8459406-8459419(+);pvalue=0.00384;qvalue=0.0872;sequence=CAGACTC;
2	fimo	nucleotide_motif	8513031	8513037	21.9	+	.	Name=DARACWW_2:8513027-8513040(+)+;Alias=MEME-1;ID=DARACWW-MEME-1-1-2:8513027-8513040(+);pvalue=0.00652;qvalue=0.0978;sequence=AAGATTT;
2	fimo	nucleotide_motif	8513199	8513205	26.2	+	.	Name=DARACWW_2:8513198-8513211(+)+;Alias=MEME-1;ID=DARACWW-MEME-1-1-2:8513198-8513211(+);pvalue=0.00237;qvalue=0.0778;sequence=AGAACTT;
2	fimo	nucleotide_motif	8514403	8514409	36.5	+	.	Name=DARACWW_2:8514397-8514412(+)+;Alias=MEME-1;ID=DARACWW-MEME-1-1-2:8514397-8514412(+);pvalue=0.000224;qvalue=0.0467;sequence=AAGACTT;
2	fimo	nucleotide_motif	8514470	8514476	25.7	+	.	Name=DARACWW_2:8514466-8514479(+)+;Alias=MEME-1;ID=DARACWW-MEME-1-1-2:8514466-8514479(+);pvalue=0.00267;qvalue=0.0794;sequence=TAGACAA;
2	fimo	nucleotide_motif	8515873	8515879	22.1	+	.	Name=DARACWW_2:8515867-8515881(+)+;Alias=MEME-1;ID=DARACWW-MEME-1-1-2:8515867-8515881(+);pvalue=0.00612;qvalue=0.0968;sequence=CAAACTC;
2	fimo	nucleotide_motif	8515973	8515979	41.1	+	.	Name=DARACWW_2:8515967-8515980(+)+;Alias=MEME-1;ID=DARACWW-MEME-1-1-2:8515967-8515980(+);pvalue=7.71e-05;qvalue=0.0467;sequence=TAGACTT;
2	fimo	nucleotide_motif	8516051	8516057	22.2	+	.	Name=DARACWW_2:8516046-8516060(+)+;Alias=MEME-1;ID=DARACWW-MEME-1-1-2:8516046-8516060(+);pvalue=0.00599;qvalue=0.0965;sequence=AAAACCT;
2	fimo	nucleotide_motif	8557850	8557856	23.7	-	.	Name=DARACWW_2:8557846-8557860(-)+;Alias=MEME-1;ID=DARACWW-MEME-1-1-2:8557846-8557860(-);pvalue=0.00431;qvalue=0.0905;sequence=TAAACTG;
2	fimo	nucleotide_motif	8557887	8557893	21.9	-	.	Name=DARACWW_2:8557882-8557895(-)+;Alias=MEME-1;ID=DARACWW-MEME-1-1-2:8557882-8557895(-);pvalue=0.00652;qvalue=0.0978;sequence=AAGATTT;
2	fimo	nucleotide_motif	8557927	8557933	21.9	-	.	Name=DARACWW_2:8557922-8557935(-)+;Alias=MEME-1;ID=DARACWW-MEME-1-1-2:8557922-8557935(-);pvalue=0.00652;qvalue=0.0978;sequence=AAGATTT;
2	fimo	nucleotide_motif	8585182	8585188	23.7	+	.	Name=DARACWW_2:8585176-8585189(+)+;Alias=MEME-1;ID=DARACWW-MEME-1-1-2:8585176-8585189(+);pvalue=0.00431;qvalue=0.0905;sequence=TAAACTG;
2	fimo	nucleotide_motif	8649664	8649670	24.2	-	.	Name=DARACWW_2:8649660-8649673(-)+;Alias=MEME-1;ID=DARACWW-MEME-1-1-2:8649660-8649673(-);pvalue=0.00379;qvalue=0.0872;sequence=AAGACCT;
2	fimo	nucleotide_motif	8737688	8737694	23.7	+	.	Name=DARACWW_2:8737682-8737697(+)+;Alias=MEME-1;ID=DARACWW-MEME-1-1-2:8737682-8737697(+);pvalue=0.00431;qvalue=0.0905;sequence=TAAACAA;
2	fimo	nucleotide_motif	8737905	8737911	21.9	-	.	Name=DARACWW_2:8737900-8737913(-)+;Alias=MEME-1;ID=DARACWW-MEME-1-1-2:8737900-8737913(-);pvalue=0.00642;qvalue=0.0978;sequence=GAGATTT;
2	fimo	nucleotide_motif	8789128	8789134	24.3	+	.	Name=DARACWW_2:8789124-8789137(+)+;Alias=MEME-1;ID=DARACWW-MEME-1-1-2:8789124-8789137(+);pvalue=0.00367;qvalue=0.0857;sequence=TGGACTA;
2	fimo	nucleotide_motif	8789189	8789195	22.2	+	.	Name=DARACWW_2:8789185-8789198(+)+;Alias=MEME-1;ID=DARACWW-MEME-1-1-2:8789185-8789198(+);pvalue=0.00599;qvalue=0.0965;sequence=ATGACTT;
2	fimo	nucleotide_motif	8789376	8789382	26.5	+	.	Name=DARACWW_2:8789369-8789382(+)+;Alias=MEME-1;ID=DARACWW-MEME-1-1-2:8789369-8789382(+);pvalue=0.00222;qvalue=0.0769;sequence=AAAACTA;
2	fimo	nucleotide_motif	8832800	8832806	23	+	.	Name=DARACWW_2:8832796-8832809(+)+;Alias=MEME-1;ID=DARACWW-MEME-1-1-2:8832796-8832809(+);pvalue=0.00506;qvalue=0.0905;sequence=TTGACTT;
2	fimo	nucleotide_motif	8843943	8843949	21.9	+	.	Name=DARACWW_2:8843940-8843953(+)+;Alias=MEME-1;ID=DARACWW-MEME-1-1-2:8843940-8843953(+);pvalue=0.00652;qvalue=0.0978;sequence=AAGATTT;
2	fimo	nucleotide_motif	8878038	8878044	26.5	-	.	Name=DARACWW_2:8878035-8878048(-)+;Alias=MEME-1;ID=DARACWW-MEME-1-1-2:8878035-8878048(-);pvalue=0.00222;qvalue=0.0769;sequence=AAAACTA;
2	fimo	nucleotide_motif	8897711	8897717	23.7	-	.	Name=DARACWW_2:8897707-8897720(-)+;Alias=MEME-1;ID=DARACWW-MEME-1-1-2:8897707-8897720(-);pvalue=0.00431;qvalue=0.0905;sequence=TAAACAA;
2	fimo	nucleotide_motif	8897765	8897771	23.3	-	.	Name=DARACWW_2:8897761-8897774(-)+;Alias=MEME-1;ID=DARACWW-MEME-1-1-2:8897761-8897774(-);pvalue=0.00471;qvalue=0.0905;sequence=GAAACAA;
2	fimo	nucleotide_motif	8897815	8897821	35	-	.	Name=DARACWW_2:8897811-8897824(-)+;Alias=MEME-1;ID=DARACWW-MEME-1-1-2:8897811-8897824(-);pvalue=0.000319;qvalue=0.0508;sequence=TAAACTT;
2	fimo	nucleotide_motif	8924844	8924850	33	+	.	Name=DARACWW_2:8924837-8924850(+)+;Alias=MEME-1;ID=DARACWW-MEME-1-1-2:8924837-8924850(+);pvalue=0.0005;qvalue=0.0508;sequence=AAAACTT;
2	fimo	nucleotide_motif	8924871	8924877	24.9	+	.	Name=DARACWW_2:8924865-8924878(+)+;Alias=MEME-1;ID=DARACWW-MEME-1-1-2:8924865-8924878(+);pvalue=0.00323;qvalue=0.0822;sequence=TAGACCT;
2	fimo	nucleotide_motif	8934053	8934059	24.9	-	.	Name=DARACWW_2:8934051-8934065(-)+;Alias=MEME-1;ID=DARACWW-MEME-1-2-2:8934051-8934065(-);pvalue=0.00323;qvalue=0.0822;sequence=AAGACAA;
2	fimo	nucleotide_motif	8934058	8934064	24.9	-	.	Name=DARACWW_2:8934051-8934065(-)+;Alias=MEME-1;ID=DARACWW-MEME-1-1-2:8934051-8934065(-);pvalue=0.00323;qvalue=0.0822;sequence=AAGACAA;
2	fimo	nucleotide_motif	8959674	8959680	24.6	+	.	Name=DARACWW_2:8959670-8959683(+)+;Alias=MEME-1;ID=DARACWW-MEME-1-1-2:8959670-8959683(+);pvalue=0.00348;qvalue=0.0846;sequence=GAGACAC;
2	fimo	nucleotide_motif	8969945	8969951	25.7	-	.	Name=DARACWW_2:8969941-8969954(-)+;Alias=MEME-1;ID=DARACWW-MEME-1-1-2:8969941-8969954(-);pvalue=0.00267;qvalue=0.0794;sequence=TAGACAA;
2	fimo	nucleotide_motif	8989196	8989202	22.5	+	.	Name=DARACWW_2:8989192-8989205(+)+;Alias=MEME-1;ID=DARACWW-MEME-1-1-2:8989192-8989205(+);pvalue=0.00567;qvalue=0.0952;sequence=GTGACTT;
2	fimo	nucleotide_motif	8999883	8999889	23.7	+	.	Name=DARACWW_2:8999879-8999892(+)+;Alias=MEME-1;ID=DARACWW-MEME-1-1-2:8999879-8999892(+);pvalue=0.00431;qvalue=0.0905;sequence=TAAACAA;
2	fimo	nucleotide_motif	9017882	9017888	26.5	+	.	Name=DARACWW_2:9017874-9017888(+)+;Alias=MEME-1;ID=DARACWW-MEME-1-1-2:9017874-9017888(+);pvalue=0.00222;qvalue=0.0769;sequence=AAAACTA;
2	fimo	nucleotide_motif	9036805	9036811	23.3	-	.	Name=DARACWW_2:9036801-9036814(-)+;Alias=MEME-1;ID=DARACWW-MEME-1-1-2:9036801-9036814(-);pvalue=0.00471;qvalue=0.0905;sequence=GAAACTG;
2	fimo	nucleotide_motif	9051861	9051867	24	-	.	Name=DARACWW_2:9051858-9051871(-)+;Alias=MEME-1;ID=DARACWW-MEME-1-1-2:9051858-9051871(-);pvalue=0.00395;qvalue=0.0888;sequence=TGGACTC;
2	fimo	nucleotide_motif	9051931	9051937	33	-	.	Name=DARACWW_2:9051924-9051938(-)+;Alias=MEME-1;ID=DARACWW-MEME-1-1-2:9051924-9051938(-);pvalue=0.0005;qvalue=0.0508;sequence=AAAACTT;
2	fimo	nucleotide_motif	9070344	9070350	25.7	+	.	Name=DARACWW_2:9070340-9070353(+)+;Alias=MEME-1;ID=DARACWW-MEME-1-1-2:9070340-9070353(+);pvalue=0.00267;qvalue=0.0794;sequence=TAGACAA;
2	fimo	nucleotide_motif	9070383	9070389	23.3	+	.	Name=DARACWW_2:9070377-9070390(+)+;Alias=MEME-1;ID=DARACWW-MEME-1-1-2:9070377-9070390(+);pvalue=0.00471;qvalue=0.0905;sequence=GAAACAA;
2	fimo	nucleotide_motif	9070929	9070935	22.5	-	.	Name=DARACWW_2:9070925-9070938(-)+;Alias=MEME-1;ID=DARACWW-MEME-1-1-2:9070925-9070938(-);pvalue=0.00567;qvalue=0.0952;sequence=TGAACTA;
2	fimo	nucleotide_motif	9103288	9103294	26.7	-	.	Name=DARACWW_2:9103282-9103295(-)+;Alias=MEME-1;ID=DARACWW-MEME-1-1-2:9103282-9103295(-);pvalue=0.00212;qvalue=0.0766;sequence=TAAACTC;
2	fimo	nucleotide_motif	9110080	9110086	23	+	.	Name=DARACWW_2:9110073-9110086(+)+;Alias=MEME-1;ID=DARACWW-MEME-1-1-2:9110073-9110086(+);pvalue=0.00506;qvalue=0.0905;sequence=AAAACAA;
2	fimo	nucleotide_motif	9110439	9110445	23	-	.	Name=DARACWW_2:9110432-9110445(-)+;Alias=MEME-1;ID=DARACWW-MEME-1-1-2:9110432-9110445(-);pvalue=0.00506;qvalue=0.0905;sequence=AAAACAA;
2	fimo	nucleotide_motif	9114224	9114230	25.6	-	.	Name=DARACWW_2:9114222-9114235(-)+;Alias=MEME-1;ID=DARACWW-MEME-1-1-2:9114222-9114235(-);pvalue=0.00274;qvalue=0.0794;sequence=CAGACAT;
2	fimo	nucleotide_motif	9128198	9128204	26	-	.	Name=DARACWW_2:9128193-9128206(-)+;Alias=MEME-1;ID=DARACWW-MEME-1-1-2:9128193-9128206(-);pvalue=0.00252;qvalue=0.0778;sequence=AAAACTC;
2	fimo	nucleotide_motif	9128295	9128301	29.7	-	.	Name=DARACWW_2:9128291-9128304(-)+;Alias=MEME-1;ID=DARACWW-MEME-1-1-2:9128291-9128304(-);pvalue=0.00108;qvalue=0.0664;sequence=GAGACTA;
2	fimo	nucleotide_motif	9128373	9128379	33	-	.	Name=DARACWW_2:9128370-9128383(-)+;Alias=MEME-1;ID=DARACWW-MEME-1-1-2:9128370-9128383(-);pvalue=0.0005;qvalue=0.0508;sequence=AAAACTT;
2	fimo	nucleotide_motif	9128381	9128387	26	-	.	Name=DARACWW_2:9128375-9128388(-)+;Alias=MEME-1;ID=DARACWW-MEME-1-1-2:9128375-9128388(-);pvalue=0.00252;qvalue=0.0778;sequence=AAAACTC;
2	fimo	nucleotide_motif	9156793	9156799	24.7	+	.	Name=DARACWW_2:9156789-9156802(+)+;Alias=MEME-1;ID=DARACWW-MEME-1-1-2:9156789-9156802(+);pvalue=0.00342;qvalue=0.0846;sequence=AGGACAT;
2	fimo	nucleotide_motif	9202275	9202281	26.5	+	.	Name=DARACWW_2:9202273-9202286(+)+;Alias=MEME-1;ID=DARACWW-MEME-1-1-2:9202273-9202286(+);pvalue=0.00222;qvalue=0.0769;sequence=AAAACTA;
2	fimo	nucleotide_motif	9219023	9219029	23.7	+	.	Name=DARACWW_2:9219017-9219030(+)+;Alias=MEME-1;ID=DARACWW-MEME-1-1-2:9219017-9219030(+);pvalue=0.00431;qvalue=0.0905;sequence=TAAACAA;
2	fimo	nucleotide_motif	9237586	9237592	21.7	+	.	Name=DARACWW_2:9237581-9237594(+)+;Alias=MEME-1;ID=DARACWW-MEME-1-1-2:9237581-9237594(+);pvalue=0.00677;qvalue=0.0998;sequence=AGAACTC;
2	fimo	nucleotide_motif	9244803	9244809	23.3	+	.	Name=DARACWW_2:9244797-9244810(+)+;Alias=MEME-1;ID=DARACWW-MEME-1-1-2:9244797-9244810(+);pvalue=0.00471;qvalue=0.0905;sequence=GAAACAA;
2	fimo	nucleotide_motif	9250161	9250167	22.2	+	.	Name=DARACWW_2:9250154-9250167(+)+;Alias=MEME-1;ID=DARACWW-MEME-1-1-2:9250154-9250167(+);pvalue=0.00599;qvalue=0.0965;sequence=AAAACCT;
2	fimo	nucleotide_motif	9320276	9320282	25.2	-	.	Name=DARACWW_2:9320270-9320283(-)+;Alias=MEME-1;ID=DARACWW-MEME-1-1-2:9320270-9320283(-);pvalue=0.003;qvalue=0.0822;sequence=TAGACAC;
2	fimo	nucleotide_motif	9320436	9320442	28	-	.	Name=DARACWW_2:9320432-9320445(-)+;Alias=MEME-1;ID=DARACWW-MEME-1-1-2:9320432-9320445(-);pvalue=0.00159;qvalue=0.0732;sequence=GAAACAT;
2	fimo	nucleotide_motif	9356944	9356950	21.8	+	.	Name=DARACWW_2:9356938-9356951(+)+;Alias=MEME-1;ID=DARACWW-MEME-1-1-2:9356938-9356951(+);pvalue=0.00658;qvalue=0.0983;sequence=GAGACAG;
2	fimo	nucleotide_motif	9357058	9357064	24.3	+	.	Name=DARACWW_2:9357052-9357065(+)+;Alias=MEME-1;ID=DARACWW-MEME-1-1-2:9357052-9357065(+);pvalue=0.00367;qvalue=0.0857;sequence=AAGACAC;
2	fimo	nucleotide_motif	9357073	9357079	30.5	+	.	Name=DARACWW_2:9357067-9357080(+)+;Alias=MEME-1;ID=DARACWW-MEME-1-1-2:9357067-9357080(+);pvalue=0.000882;qvalue=0.0619;sequence=CAGACTT;
2	fimo	nucleotide_motif	9414269	9414275	34	+	.	Name=DARACWW_2:9414267-9414280(+)+;Alias=MEME-1;ID=DARACWW-MEME-1-1-2:9414267-9414280(+);pvalue=0.0004;qvalue=0.0508;sequence=GAAACTT;
2	fimo	nucleotide_motif	9451497	9451503	25.7	+	.	Name=DARACWW_2:9451491-9451504(+)+;Alias=MEME-1;ID=DARACWW-MEME-1-1-2:9451491-9451504(+);pvalue=0.00267;qvalue=0.0794;sequence=TAGACAA;
2	fimo	nucleotide_motif	9451502	9451508	21.8	+	.	Name=DARACWW_2:9451496-9451509(+)+;Alias=MEME-1;ID=DARACWW-MEME-1-2-2:9451496-9451509(+);pvalue=0.00665;qvalue=0.0986;sequence=AAGACAG;
2	fimo	nucleotide_motif	9451679	9451685	21.9	-	.	Name=DARACWW_2:9451674-9451688(-)+;Alias=MEME-1;ID=DARACWW-MEME-1-1-2:9451674-9451688(-);pvalue=0.00652;qvalue=0.0978;sequence=AAGATTT;
2	fimo	nucleotide_motif	9583675	9583681	25.2	+	.	Name=DARACWW_2:9583671-9583684(+)+;Alias=MEME-1;ID=DARACWW-MEME-1-1-2:9583671-9583684(+);pvalue=0.003;qvalue=0.0822;sequence=GAGACAA;
2	fimo	nucleotide_motif	9624062	9624068	27.4	+	.	Name=DARACWW_2:9624056-9624069(+)+;Alias=MEME-1;ID=DARACWW-MEME-1-1-2:9624056-9624069(+);pvalue=0.0018;qvalue=0.0746;sequence=TAAACTA;
2	fimo	nucleotide_motif	9638535	9638541	26	+	.	Name=DARACWW_2:9638528-9638542(+)+;Alias=MEME-1;ID=DARACWW-MEME-1-1-2:9638528-9638542(+);pvalue=0.00252;qvalue=0.0778;sequence=AAAACTC;
2	fimo	nucleotide_motif	9638569	9638575	36.5	+	.	Name=DARACWW_2:9638562-9638576(+)+;Alias=MEME-1;ID=DARACWW-MEME-1-1-2:9638562-9638576(+);pvalue=0.000224;qvalue=0.0467;sequence=AAGACTT;
2	fimo	nucleotide_motif	9638605	9638611	23	+	.	Name=DARACWW_2:9638601-9638614(+)+;Alias=MEME-1;ID=DARACWW-MEME-1-1-2:9638601-9638614(+);pvalue=0.00506;qvalue=0.0905;sequence=AAAACAA;
2	fimo	nucleotide_motif	9824150	9824156	27.7	-	.	Name=DARACWW_2:9824146-9824159(-)+;Alias=MEME-1;ID=DARACWW-MEME-1-1-2:9824146-9824159(-);pvalue=0.0017;qvalue=0.0732;sequence=AAAACAT;
2	fimo	nucleotide_motif	9919032	9919038	32.3	+	.	Name=DARACWW_2:9919026-9919039(+)+;Alias=MEME-1;ID=DARACWW-MEME-1-1-2:9919026-9919039(+);pvalue=0.000582;qvalue=0.0548;sequence=TAGACAT;
2	fimo	nucleotide_motif	9919172	9919178	26.5	+	.	Name=DARACWW_2:9919165-9919178(+)+;Alias=MEME-1;ID=DARACWW-MEME-1-1-2:9919165-9919178(+);pvalue=0.00222;qvalue=0.0769;sequence=AAAACTA;
2	fimo	nucleotide_motif	9926219	9926225	22.8	+	.	Name=DARACWW_2:9926213-9926226(+)+;Alias=MEME-1;ID=DARACWW-MEME-1-1-2:9926213-9926226(+);pvalue=0.0053;qvalue=0.093;sequence=CAAACTA;
2	fimo	nucleotide_motif	9946138	9946144	41.1	+	.	Name=DARACWW_2:9946132-9946145(+)+;Alias=MEME-1;ID=DARACWW-MEME-1-1-2:9946132-9946145(+);pvalue=7.71e-05;qvalue=0.0467;sequence=TAGACTT;
2	fimo	nucleotide_motif	9946193	9946199	23	+	.	Name=DARACWW_2:9946189-9946202(+)+;Alias=MEME-1;ID=DARACWW-MEME-1-1-2:9946189-9946202(+);pvalue=0.00506;qvalue=0.0905;sequence=TTGACTT;
2	fimo	nucleotide_motif	9960538	9960544	23.6	-	.	Name=DARACWW_2:9960534-9960547(-)+;Alias=MEME-1;ID=DARACWW-MEME-1-1-2:9960534-9960547(-);pvalue=0.00439;qvalue=0.0905;sequence=CAAACAT;
2	fimo	nucleotide_motif	10123509	10123515	27.3	-	.	Name=DARACWW_2:10123503-10123516(-)+;Alias=MEME-1;ID=DARACWW-MEME-1-1-2:10123503-10123516(-);pvalue=0.00188;qvalue=0.0756;sequence=CAAACTT;
2	fimo	nucleotide_motif	10135698	10135704	23	-	.	Name=DARACWW_2:10135693-10135708(-)+;Alias=MEME-1;ID=DARACWW-MEME-1-1-2:10135693-10135708(-);pvalue=0.00506;qvalue=0.0905;sequence=TAAACCT;
2	fimo	nucleotide_motif	10135731	10135737	29.7	-	.	Name=DARACWW_2:10135727-10135740(-)+;Alias=MEME-1;ID=DARACWW-MEME-1-1-2:10135727-10135740(-);pvalue=0.00108;qvalue=0.0664;sequence=GAGACTA;
2	fimo	nucleotide_motif	10135760	10135766	24.3	-	.	Name=DARACWW_2:10135756-10135769(-)+;Alias=MEME-1;ID=DARACWW-MEME-1-1-2:10135756-10135769(-);pvalue=0.00367;qvalue=0.0857;sequence=GAGACCT;
2	fimo	nucleotide_motif	10201185	10201191	23.3	-	.	Name=DARACWW_2:10201181-10201194(-)+;Alias=MEME-1;ID=DARACWW-MEME-1-1-2:10201181-10201194(-);pvalue=0.00471;qvalue=0.0905;sequence=TAAACAC;
2	fimo	nucleotide_motif	10217730	10217736	34	-	.	Name=DARACWW_2:10217726-10217739(-)+;Alias=MEME-1;ID=DARACWW-MEME-1-1-2:10217726-10217739(-);pvalue=0.0004;qvalue=0.0508;sequence=GAAACTT;
2	fimo	nucleotide_motif	10217737	10217743	21.9	-	.	Name=DARACWW_2:10217733-10217746(-)+;Alias=MEME-1;ID=DARACWW-MEME-1-1-2:10217733-10217746(-);pvalue=0.00652;qvalue=0.0978;sequence=AAGATTT;
2	fimo	nucleotide_motif	10283603	10283609	23.6	+	.	Name=DARACWW_2:10283597-10283610(+)+;Alias=MEME-1;ID=DARACWW-MEME-1-1-2:10283597-10283610(+);pvalue=0.00439;qvalue=0.0905;sequence=CAAACAT;
2	fimo	nucleotide_motif	10286986	10286992	25.2	-	.	Name=DARACWW_2:10286982-10286995(-)+;Alias=MEME-1;ID=DARACWW-MEME-1-1-2:10286982-10286995(-);pvalue=0.003;qvalue=0.0822;sequence=GAGACTG;
2	fimo	nucleotide_motif	10340042	10340048	25.2	+	.	Name=DARACWW_2:10340036-10340049(+)+;Alias=MEME-1;ID=DARACWW-MEME-1-1-2:10340036-10340049(+);pvalue=0.003;qvalue=0.0822;sequence=TAGACAC;
2	fimo	nucleotide_motif	10340074	10340080	23	+	.	Name=DARACWW_2:10340070-10340083(+)+;Alias=MEME-1;ID=DARACWW-MEME-1-1-2:10340070-10340083(+);pvalue=0.00506;qvalue=0.0905;sequence=TTGACTT;
2	fimo	nucleotide_motif	10364549	10364555	41.1	-	.	Name=DARACWW_2:10364543-10364556(-)+;Alias=MEME-1;ID=DARACWW-MEME-1-1-2:10364543-10364556(-);pvalue=7.71e-05;qvalue=0.0467;sequence=TAGACTT;
2	fimo	nucleotide_motif	10376226	10376232	24.7	+	.	Name=DARACWW_2:10376220-10376233(+)+;Alias=MEME-1;ID=DARACWW-MEME-1-1-2:10376220-10376233(+);pvalue=0.00342;qvalue=0.0846;sequence=CAGACTA;
2	fimo	nucleotide_motif	10663457	10663463	23	-	.	Name=DARACWW_2:10663453-10663466(-)+;Alias=MEME-1;ID=DARACWW-MEME-1-1-2:10663453-10663466(-);pvalue=0.00506;qvalue=0.0905;sequence=TTGACTT;
2	fimo	nucleotide_motif	10685893	10685899	26.7	+	.	Name=DARACWW_2:10685891-10685904(+)+;Alias=MEME-1;ID=DARACWW-MEME-1-1-2:10685891-10685904(+);pvalue=0.00212;qvalue=0.0766;sequence=TAAACTC;
2	fimo	nucleotide_motif	10723862	10723868	24.2	+	.	Name=DARACWW_2:10723856-10723869(+)+;Alias=MEME-1;ID=DARACWW-MEME-1-1-2:10723856-10723869(+);pvalue=0.00379;qvalue=0.0872;sequence=AAGACCT;
2	fimo	nucleotide_motif	10724401	10724407	27.4	-	.	Name=DARACWW_2:10724396-10724411(-)+;Alias=MEME-1;ID=DARACWW-MEME-1-1-2:10724396-10724411(-);pvalue=0.0018;qvalue=0.0746;sequence=TAAACTA;
2	fimo	nucleotide_motif	10740423	10740429	36.5	+	.	Name=DARACWW_2:10740417-10740430(+)+;Alias=MEME-1;ID=DARACWW-MEME-1-1-2:10740417-10740430(+);pvalue=0.000224;qvalue=0.0467;sequence=AAGACTT;
2	fimo	nucleotide_motif	10762479	10762485	28.5	-	.	Name=DARACWW_2:10762477-10762490(-)+;Alias=MEME-1;ID=DARACWW-MEME-1-1-2:10762477-10762490(-);pvalue=0.00141;qvalue=0.0732;sequence=AAGACTC;
2	fimo	nucleotide_motif	10862203	10862209	22	+	.	Name=DARACWW_2:10862201-10862214(+)+;Alias=MEME-1;ID=DARACWW-MEME-1-1-2:10862201-10862214(+);pvalue=0.00626;qvalue=0.0978;sequence=TGAACTC;
2	fimo	nucleotide_motif	10928881	10928887	26.5	-	.	Name=DARACWW_2:10928877-10928890(-)+;Alias=MEME-1;ID=DARACWW-MEME-1-1-2:10928877-10928890(-);pvalue=0.00222;qvalue=0.0769;sequence=AAAACTA;
2	fimo	nucleotide_motif	10928886	10928892	24.9	-	.	Name=DARACWW_2:10928884-10928897(-)+;Alias=MEME-1;ID=DARACWW-MEME-1-1-2:10928884-10928897(-);pvalue=0.00323;qvalue=0.0822;sequence=AAGACAA;
2	fimo	nucleotide_motif	10928931	10928937	31.3	-	.	Name=DARACWW_2:10928927-10928940(-)+;Alias=MEME-1;ID=DARACWW-MEME-1-1-2:10928927-10928940(-);pvalue=0.000737;qvalue=0.0566;sequence=AAGACAT;
2	fimo	nucleotide_motif	10929011	10929017	23.5	-	.	Name=DARACWW_2:10929007-10929020(-)+;Alias=MEME-1;ID=DARACWW-MEME-1-1-2:10929007-10929020(-);pvalue=0.00447;qvalue=0.0905;sequence=TGAACAT;
2	fimo	nucleotide_motif	11034393	11034399	24.9	+	.	Name=DARACWW_2:11034385-11034400(+)+;Alias=MEME-1;ID=DARACWW-MEME-1-1-2:11034385-11034400(+);pvalue=0.00323;qvalue=0.0822;sequence=AAGACAA;
2	fimo	nucleotide_motif	11034397	11034403	23.6	+	.	Name=DARACWW_2:11034391-11034406(+)+;Alias=MEME-1;ID=DARACWW-MEME-1-2-2:11034391-11034406(+);pvalue=0.00439;qvalue=0.0905;sequence=CAAACAT;
2	fimo	nucleotide_motif	11071806	11071812	27.7	-	.	Name=DARACWW_2:11071802-11071815(-)+;Alias=MEME-1;ID=DARACWW-MEME-1-1-2:11071802-11071815(-);pvalue=0.0017;qvalue=0.0732;sequence=AAAACAT;
2	fimo	nucleotide_motif	11105192	11105198	23.7	+	.	Name=DARACWW_2:11105186-11105199(+)+;Alias=MEME-1;ID=DARACWW-MEME-1-1-2:11105186-11105199(+);pvalue=0.00431;qvalue=0.0905;sequence=TAAACAA;
2	fimo	nucleotide_motif	11131614	11131620	28.5	-	.	Name=DARACWW_2:11131607-11131620(-)+;Alias=MEME-1;ID=DARACWW-MEME-1-1-2:11131607-11131620(-);pvalue=0.00141;qvalue=0.0732;sequence=AAGACTC;
2	fimo	nucleotide_motif	11159192	11159198	26	+	.	Name=DARACWW_2:11159189-11159203(+)+;Alias=MEME-1;ID=DARACWW-MEME-1-1-2:11159189-11159203(+);pvalue=0.00252;qvalue=0.0778;sequence=AAAACTC;
2	fimo	nucleotide_motif	11208214	11208220	41.1	-	.	Name=DARACWW_2:11208212-11208225(-)+;Alias=MEME-1;ID=DARACWW-MEME-1-1-2:11208212-11208225(-);pvalue=7.71e-05;qvalue=0.0467;sequence=TAGACTT;
2	fimo	nucleotide_motif	11208255	11208261	25.7	-	.	Name=DARACWW_2:11208253-11208266(-)+;Alias=MEME-1;ID=DARACWW-MEME-1-1-2:11208253-11208266(-);pvalue=0.00267;qvalue=0.0794;sequence=TAGACAA;
2	fimo	nucleotide_motif	11216544	11216550	26	+	.	Name=DARACWW_2:11216537-11216550(+)+;Alias=MEME-1;ID=DARACWW-MEME-1-1-2:11216537-11216550(+);pvalue=0.00252;qvalue=0.0778;sequence=AAAACTC;
2	fimo	nucleotide_motif	11270811	11270817	33	+	.	Name=DARACWW_2:11270804-11270818(+)+;Alias=MEME-1;ID=DARACWW-MEME-1-1-2:11270804-11270818(+);pvalue=0.0005;qvalue=0.0508;sequence=AAAACTT;
2	fimo	nucleotide_motif	11343498	11343504	26.7	+	.	Name=DARACWW_2:11343493-11343507(+)+;Alias=MEME-1;ID=DARACWW-MEME-1-1-2:11343493-11343507(+);pvalue=0.00212;qvalue=0.0766;sequence=TAAACTC;
2	fimo	nucleotide_motif	11391433	11391439	24.9	+	.	Name=DARACWW_2:11391431-11391444(+)+;Alias=MEME-1;ID=DARACWW-MEME-1-1-2:11391431-11391444(+);pvalue=0.00323;qvalue=0.0822;sequence=AAGACTG;
2	fimo	nucleotide_motif	11475029	11475035	23.3	-	.	Name=DARACWW_2:11475025-11475038(-)+;Alias=MEME-1;ID=DARACWW-MEME-1-1-2:11475025-11475038(-);pvalue=0.00471;qvalue=0.0905;sequence=GAAACAA;
2	fimo	nucleotide_motif	11475037	11475043	31.9	-	.	Name=DARACWW_2:11475033-11475046(-)+;Alias=MEME-1;ID=DARACWW-MEME-1-1-2:11475033-11475046(-);pvalue=0.000651;qvalue=0.0555;sequence=GAGACAT;
2	fimo	nucleotide_motif	11475055	11475061	23.3	-	.	Name=DARACWW_2:11475051-11475064(-)+;Alias=MEME-1;ID=DARACWW-MEME-1-1-2:11475051-11475064(-);pvalue=0.00471;qvalue=0.0905;sequence=GAAACAA;
2	fimo	nucleotide_motif	11475062	11475068	27.7	-	.	Name=DARACWW_2:11475058-11475072(-)+;Alias=MEME-1;ID=DARACWW-MEME-1-1-2:11475058-11475072(-);pvalue=0.0017;qvalue=0.0732;sequence=AAAACAT;
2	fimo	nucleotide_motif	11475086	11475092	28.2	-	.	Name=DARACWW_2:11475082-11475096(-)+;Alias=MEME-1;ID=DARACWW-MEME-1-1-2:11475082-11475096(-);pvalue=0.00151;qvalue=0.0732;sequence=TAAACAT;
2	fimo	nucleotide_motif	11533187	11533193	22.5	+	.	Name=DARACWW_2:11533182-11533195(+)+;Alias=MEME-1;ID=DARACWW-MEME-1-1-2:11533182-11533195(+);pvalue=0.00567;qvalue=0.0952;sequence=TGAACTA;
2	fimo	nucleotide_motif	11533198	11533204	22.5	+	.	Name=DARACWW_2:11533194-11533207(+)+;Alias=MEME-1;ID=DARACWW-MEME-1-1-2:11533194-11533207(+);pvalue=0.00567;qvalue=0.0952;sequence=GTGACTT;
2	fimo	nucleotide_motif	11609257	11609263	33	-	.	Name=DARACWW_2:11609253-11609266(-)+;Alias=MEME-1;ID=DARACWW-MEME-1-1-2:11609253-11609266(-);pvalue=0.0005;qvalue=0.0508;sequence=AAAACTT;
2	fimo	nucleotide_motif	11621300	11621306	22.2	-	.	Name=DARACWW_2:11621295-11621310(-)+;Alias=MEME-1;ID=DARACWW-MEME-1-1-2:11621295-11621310(-);pvalue=0.00599;qvalue=0.0965;sequence=AAAACCT;
2	fimo	nucleotide_motif	11636516	11636522	30.2	+	.	Name=DARACWW_2:11636512-11636525(+)+;Alias=MEME-1;ID=DARACWW-MEME-1-1-2:11636512-11636525(+);pvalue=0.000945;qvalue=0.0635;sequence=TGGACTT;
2	fimo	nucleotide_motif	11783816	11783822	23	+	.	Name=DARACWW_2:11783809-11783822(+)+;Alias=MEME-1;ID=DARACWW-MEME-1-1-2:11783809-11783822(+);pvalue=0.00506;qvalue=0.0905;sequence=AAAACAA;
2	fimo	nucleotide_motif	11817776	11817782	32.3	+	.	Name=DARACWW_2:11817772-11817785(+)+;Alias=MEME-1;ID=DARACWW-MEME-1-1-2:11817772-11817785(+);pvalue=0.000582;qvalue=0.0548;sequence=TAGACAT;
2	fimo	nucleotide_motif	11819455	11819461	41.1	+	.	Name=DARACWW_2:11819449-11819462(+)+;Alias=MEME-1;ID=DARACWW-MEME-1-1-2:11819449-11819462(+);pvalue=7.71e-05;qvalue=0.0467;sequence=TAGACTT;
2	fimo	nucleotide_motif	11819491	11819497	23.6	+	.	Name=DARACWW_2:11819484-11819500(+)+;Alias=MEME-1;ID=DARACWW-MEME-1-1-2:11819484-11819500(+);pvalue=0.00439;qvalue=0.0905;sequence=CAAACAT;
2	fimo	nucleotide_motif	11819527	11819533	22.8	+	.	Name=DARACWW_2:11819521-11819534(+)+;Alias=MEME-1;ID=DARACWW-MEME-1-1-2:11819521-11819534(+);pvalue=0.0053;qvalue=0.093;sequence=CAAACTA;
2	fimo	nucleotide_motif	11819858	11819864	26.7	-	.	Name=DARACWW_2:11819854-11819867(-)+;Alias=MEME-1;ID=DARACWW-MEME-1-1-2:11819854-11819867(-);pvalue=0.00212;qvalue=0.0766;sequence=TAAACTC;
2	fimo	nucleotide_motif	11819977	11819983	24.6	-	.	Name=DARACWW_2:11819973-11819986(-)+;Alias=MEME-1;ID=DARACWW-MEME-1-1-2:11819973-11819986(-);pvalue=0.00348;qvalue=0.0846;sequence=GAGACAC;
2	fimo	nucleotide_motif	11863778	11863784	22.5	+	.	Name=DARACWW_2:11863774-11863788(+)+;Alias=MEME-1;ID=DARACWW-MEME-1-1-2:11863774-11863788(+);pvalue=0.00567;qvalue=0.0952;sequence=GTGACTT;
2	fimo	nucleotide_motif	11864592	11864598	33	-	.	Name=DARACWW_2:11864588-11864601(-)+;Alias=MEME-1;ID=DARACWW-MEME-1-1-2:11864588-11864601(-);pvalue=0.0005;qvalue=0.0508;sequence=AAAACTT;
2	fimo	nucleotide_motif	11899417	11899423	26.1	-	.	Name=DARACWW_2:11899413-11899426(-)+;Alias=MEME-1;ID=DARACWW-MEME-1-1-2:11899413-11899426(-);pvalue=0.00244;qvalue=0.0778;sequence=GAAACTC;
2	fimo	nucleotide_motif	12016396	12016402	35	+	.	Name=DARACWW_2:12016394-12016407(+)+;Alias=MEME-1;ID=DARACWW-MEME-1-1-2:12016394-12016407(+);pvalue=0.000319;qvalue=0.0508;sequence=TAAACTT;
2	fimo	nucleotide_motif	12087982	12087988	24.7	+	.	Name=DARACWW_2:12087978-12087991(+)+;Alias=MEME-1;ID=DARACWW-MEME-1-1-2:12087978-12087991(+);pvalue=0.00342;qvalue=0.0846;sequence=AGGACAT;
2	fimo	nucleotide_motif	12159665	12159671	22.2	-	.	Name=DARACWW_2:12159661-12159674(-)+;Alias=MEME-1;ID=DARACWW-MEME-1-1-2:12159661-12159674(-);pvalue=0.00599;qvalue=0.0965;sequence=AAAACCT;
2	fimo	nucleotide_motif	12225989	12225995	33	-	.	Name=DARACWW_2:12225986-12226000(-)+;Alias=MEME-1;ID=DARACWW-MEME-1-1-2:12225986-12226000(-);pvalue=0.0005;qvalue=0.0508;sequence=AAAACTT;
2	fimo	nucleotide_motif	12255835	12255841	25.5	+	.	Name=DARACWW_2:12255831-12255844(+)+;Alias=MEME-1;ID=DARACWW-MEME-1-1-2:12255831-12255844(+);pvalue=0.00281;qvalue=0.0801;sequence=TGGACAT;
2	fimo	nucleotide_motif	12356436	12356442	22.2	-	.	Name=DARACWW_2:12356430-12356443(-)+;Alias=MEME-1;ID=DARACWW-MEME-1-1-2:12356430-12356443(-);pvalue=0.00599;qvalue=0.0965;sequence=ATGACTT;
2	fimo	nucleotide_motif	12356620	12356626	21.9	-	.	Name=DARACWW_2:12356615-12356628(-)+;Alias=MEME-1;ID=DARACWW-MEME-1-1-2:12356615-12356628(-);pvalue=0.00642;qvalue=0.0978;sequence=GAGATTT;
2	fimo	nucleotide_motif	12415884	12415890	28	-	.	Name=DARACWW_2:12415880-12415893(-)+;Alias=MEME-1;ID=DARACWW-MEME-1-1-2:12415880-12415893(-);pvalue=0.00159;qvalue=0.0732;sequence=GAAACAT;
2	fimo	nucleotide_motif	12415920	12415926	28	-	.	Name=DARACWW_2:12415916-12415929(-)+;Alias=MEME-1;ID=DARACWW-MEME-1-1-2:12415916-12415929(-);pvalue=0.00159;qvalue=0.0732;sequence=GAAACAT;
2	fimo	nucleotide_motif	12471543	12471549	22	+	.	Name=DARACWW_2:12471538-12471551(+)+;Alias=MEME-1;ID=DARACWW-MEME-1-1-2:12471538-12471551(+);pvalue=0.00626;qvalue=0.0978;sequence=GGAACTA;
2	fimo	nucleotide_motif	12605187	12605193	23.3	+	.	Name=DARACWW_2:12605181-12605194(+)+;Alias=MEME-1;ID=DARACWW-MEME-1-1-2:12605181-12605194(+);pvalue=0.00471;qvalue=0.0905;sequence=TAAACAC;
2	fimo	nucleotide_motif	12644203	12644209	26	-	.	Name=DARACWW_2:12644196-12644210(-)+;Alias=MEME-1;ID=DARACWW-MEME-1-1-2:12644196-12644210(-);pvalue=0.00252;qvalue=0.0778;sequence=AAAACTC;
2	fimo	nucleotide_motif	12650040	12650046	27.4	-	.	Name=DARACWW_2:12650036-12650049(-)+;Alias=MEME-1;ID=DARACWW-MEME-1-1-2:12650036-12650049(-);pvalue=0.0018;qvalue=0.0746;sequence=TAAACTA;
2	fimo	nucleotide_motif	12669914	12669920	24.9	+	.	Name=DARACWW_2:12669906-12669921(+)+;Alias=MEME-1;ID=DARACWW-MEME-1-1-2:12669906-12669921(+);pvalue=0.00323;qvalue=0.0822;sequence=AAGACAA;
2	fimo	nucleotide_motif	12673453	12673459	23.7	-	.	Name=DARACWW_2:12673449-12673462(-)+;Alias=MEME-1;ID=DARACWW-MEME-1-1-2:12673449-12673462(-);pvalue=0.00431;qvalue=0.0905;sequence=TAAACAA;
2	fimo	nucleotide_motif	12696890	12696896	28.9	+	.	Name=DARACWW_2:12696886-12696899(+)+;Alias=MEME-1;ID=DARACWW-MEME-1-1-2:12696886-12696899(+);pvalue=0.00128;qvalue=0.0722;sequence=AGGACTT;
2	fimo	nucleotide_motif	12769095	12769101	24	-	.	Name=DARACWW_2:12769090-12769103(-)+;Alias=MEME-1;ID=DARACWW-MEME-1-1-2:12769090-12769103(-);pvalue=0.00395;qvalue=0.0888;sequence=TGGACTC;
2	fimo	nucleotide_motif	12769135	12769141	23.3	-	.	Name=DARACWW_2:12769131-12769145(-)+;Alias=MEME-1;ID=DARACWW-MEME-1-1-2:12769131-12769145(-);pvalue=0.00471;qvalue=0.0905;sequence=TAAACAC;
2	fimo	nucleotide_motif	12809321	12809327	23.6	+	.	Name=DARACWW_2:12809315-12809328(+)+;Alias=MEME-1;ID=DARACWW-MEME-1-1-2:12809315-12809328(+);pvalue=0.00439;qvalue=0.0905;sequence=CAAACAT;
2	fimo	nucleotide_motif	12826608	12826614	25.2	+	.	Name=DARACWW_2:12826602-12826615(+)+;Alias=MEME-1;ID=DARACWW-MEME-1-1-2:12826602-12826615(+);pvalue=0.003;qvalue=0.0822;sequence=TAGACAC;
2	fimo	nucleotide_motif	12828619	12828625	36.5	+	.	Name=DARACWW_2:12828612-12828626(+)+;Alias=MEME-1;ID=DARACWW-MEME-1-1-2:12828612-12828626(+);pvalue=0.000224;qvalue=0.0467;sequence=AAGACTT;
2	fimo	nucleotide_motif	12828816	12828822	24	+	.	Name=DARACWW_2:12828812-12828825(+)+;Alias=MEME-1;ID=DARACWW-MEME-1-1-2:12828812-12828825(+);pvalue=0.00395;qvalue=0.0888;sequence=TGGACTC;
2	fimo	nucleotide_motif	12852493	12852499	28.7	-	.	Name=DARACWW_2:12852489-12852502(-)+;Alias=MEME-1;ID=DARACWW-MEME-1-1-2:12852489-12852502(-);pvalue=0.00134;qvalue=0.073;sequence=GAGACTC;
2	fimo	nucleotide_motif	12852599	12852605	26.1	-	.	Name=DARACWW_2:12852593-12852606(-)+;Alias=MEME-1;ID=DARACWW-MEME-1-1-2:12852593-12852606(-);pvalue=0.00244;qvalue=0.0778;sequence=GAAACTC;
2	fimo	nucleotide_motif	12907969	12907975	23.3	-	.	Name=DARACWW_2:12907965-12907978(-)+;Alias=MEME-1;ID=DARACWW-MEME-1-1-2:12907965-12907978(-);pvalue=0.00471;qvalue=0.0905;sequence=GAAACAA;
2	fimo	nucleotide_motif	12975317	12975323	23.7	+	.	Name=DARACWW_2:12975311-12975324(+)+;Alias=MEME-1;ID=DARACWW-MEME-1-1-2:12975311-12975324(+);pvalue=0.00431;qvalue=0.0905;sequence=TAAACAA;
2	fimo	nucleotide_motif	12975369	12975375	22.2	+	.	Name=DARACWW_2:12975363-12975379(+)+;Alias=MEME-1;ID=DARACWW-MEME-1-1-2:12975363-12975379(+);pvalue=0.00599;qvalue=0.0965;sequence=AAAACCT;
2	fimo	nucleotide_motif	12993827	12993833	22.2	-	.	Name=DARACWW_2:12993823-12993836(-)+;Alias=MEME-1;ID=DARACWW-MEME-1-1-2:12993823-12993836(-);pvalue=0.00599;qvalue=0.0965;sequence=ATGACTT;
2	fimo	nucleotide_motif	13002865	13002871	30.9	-	.	Name=DARACWW_2:13002861-13002874(-)+;Alias=MEME-1;ID=DARACWW-MEME-1-1-2:13002861-13002874(-);pvalue=0.000818;qvalue=0.0606;sequence=TAGACTA;
2	fimo	nucleotide_motif	13019217	13019223	26.5	-	.	Name=DARACWW_2:13019210-13019225(-)+;Alias=MEME-1;ID=DARACWW-MEME-1-1-2:13019210-13019225(-);pvalue=0.00222;qvalue=0.0769;sequence=AAAACTA;
2	fimo	nucleotide_motif	13019224	13019230	29.3	-	.	Name=DARACWW_2:13019214-13019231(-)+;Alias=MEME-1;ID=DARACWW-MEME-1-1-2:13019214-13019231(-);pvalue=0.00116;qvalue=0.0681;sequence=AAGACTA;
2	fimo	nucleotide_motif	13035504	13035510	28.5	+	.	Name=DARACWW_2:13035497-13035511(+)+;Alias=MEME-1;ID=DARACWW-MEME-1-1-2:13035497-13035511(+);pvalue=0.00141;qvalue=0.0732;sequence=AAGACTC;
2	fimo	nucleotide_motif	13082036	13082042	31.9	-	.	Name=DARACWW_2:13082032-13082045(-)+;Alias=MEME-1;ID=DARACWW-MEME-1-1-2:13082032-13082045(-);pvalue=0.000651;qvalue=0.0555;sequence=GAGACAT;
2	fimo	nucleotide_motif	13098379	13098385	27.7	+	.	Name=DARACWW_2:13098372-13098385(+)+;Alias=MEME-1;ID=DARACWW-MEME-1-1-2:13098372-13098385(+);pvalue=0.0017;qvalue=0.0732;sequence=AAAACAT;
2	fimo	nucleotide_motif	13177117	13177123	27.3	+	.	Name=DARACWW_2:13177112-13177125(+)+;Alias=MEME-1;ID=DARACWW-MEME-1-1-2:13177112-13177125(+);pvalue=0.00188;qvalue=0.0756;sequence=CAAACTT;
2	fimo	nucleotide_motif	13181710	13181716	23.6	+	.	Name=DARACWW_2:13181704-13181718(+)+;Alias=MEME-1;ID=DARACWW-MEME-1-1-2:13181704-13181718(+);pvalue=0.00439;qvalue=0.0905;sequence=CAAACAT;
2	fimo	nucleotide_motif	13181741	13181747	21.8	+	.	Name=DARACWW_2:13181735-13181748(+)+;Alias=MEME-1;ID=DARACWW-MEME-1-1-2:13181735-13181748(+);pvalue=0.00665;qvalue=0.0986;sequence=AAGACAG;
2	fimo	nucleotide_motif	13209029	13209035	26.5	-	.	Name=DARACWW_2:13209026-13209039(-)+;Alias=MEME-1;ID=DARACWW-MEME-1-1-2:13209026-13209039(-);pvalue=0.00222;qvalue=0.0769;sequence=AAAACTA;
2	fimo	nucleotide_motif	13209054	13209060	23.3	-	.	Name=DARACWW_2:13209048-13209063(-)+;Alias=MEME-1;ID=DARACWW-MEME-1-1-2:13209048-13209063(-);pvalue=0.00471;qvalue=0.0905;sequence=TAAACAC;
2	fimo	nucleotide_motif	13220729	13220735	29.3	-	.	Name=DARACWW_2:13220725-13220738(-)+;Alias=MEME-1;ID=DARACWW-MEME-1-1-2:13220725-13220738(-);pvalue=0.00116;qvalue=0.0681;sequence=AAGACTA;
2	fimo	nucleotide_motif	13294976	13294982	33	+	.	Name=DARACWW_2:13294969-13294982(+)+;Alias=MEME-1;ID=DARACWW-MEME-1-1-2:13294969-13294982(+);pvalue=0.0005;qvalue=0.0508;sequence=AAAACTT;
2	fimo	nucleotide_motif	13370904	13370910	22.2	+	.	Name=DARACWW_2:13370897-13370910(+)+;Alias=MEME-1;ID=DARACWW-MEME-1-1-2:13370897-13370910(+);pvalue=0.00599;qvalue=0.0965;sequence=AAAACCT;
2	fimo	nucleotide_motif	13370918	13370924	31.9	+	.	Name=DARACWW_2:13370914-13370927(+)+;Alias=MEME-1;ID=DARACWW-MEME-1-1-2:13370914-13370927(+);pvalue=0.000651;qvalue=0.0555;sequence=GAGACAT;
2	fimo	nucleotide_motif	13370944	13370950	33	+	.	Name=DARACWW_2:13370937-13370950(+)+;Alias=MEME-1;ID=DARACWW-MEME-1-1-2:13370937-13370950(+);pvalue=0.0005;qvalue=0.0508;sequence=AAAACTT;
2	fimo	nucleotide_motif	13383418	13383424	33	+	.	Name=DARACWW_2:13383411-13383424(+)+;Alias=MEME-1;ID=DARACWW-MEME-1-1-2:13383411-13383424(+);pvalue=0.0005;qvalue=0.0508;sequence=AAAACTT;
2	fimo	nucleotide_motif	13383428	13383434	22.2	+	.	Name=DARACWW_2:13383421-13383434(+)+;Alias=MEME-1;ID=DARACWW-MEME-1-1-2:13383421-13383434(+);pvalue=0.00599;qvalue=0.0965;sequence=AAAACCT;
2	fimo	nucleotide_motif	13387173	13387179	23	-	.	Name=DARACWW_2:13387168-13387182(-)+;Alias=MEME-1;ID=DARACWW-MEME-1-1-2:13387168-13387182(-);pvalue=0.00506;qvalue=0.0905;sequence=AAAACAA;
2	fimo	nucleotide_motif	13399140	13399146	23	-	.	Name=DARACWW_2:13399139-13399152(-)+;Alias=MEME-1;ID=DARACWW-MEME-1-1-2:13399139-13399152(-);pvalue=0.00506;qvalue=0.0905;sequence=AAAACTG;
2	fimo	nucleotide_motif	13413172	13413178	23.7	+	.	Name=DARACWW_2:13413166-13413179(+)+;Alias=MEME-1;ID=DARACWW-MEME-1-1-2:13413166-13413179(+);pvalue=0.00431;qvalue=0.0905;sequence=TAAACAA;
2	fimo	nucleotide_motif	13413177	13413183	26	+	.	Name=DARACWW_2:13413173-13413186(+)+;Alias=MEME-1;ID=DARACWW-MEME-1-1-2:13413173-13413186(+);pvalue=0.00252;qvalue=0.0778;sequence=AAAACTC;
2	fimo	nucleotide_motif	13438136	13438142	27.3	-	.	Name=DARACWW_2:13438129-13438143(-)+;Alias=MEME-1;ID=DARACWW-MEME-1-1-2:13438129-13438143(-);pvalue=0.00188;qvalue=0.0756;sequence=CAAACTT;
2	fimo	nucleotide_motif	13451857	13451863	28.5	+	.	Name=DARACWW_2:13451850-13451864(+)+;Alias=MEME-1;ID=DARACWW-MEME-1-1-2:13451850-13451864(+);pvalue=0.00141;qvalue=0.0732;sequence=AAGACTC;
2	fimo	nucleotide_motif	13491047	13491053	27.7	-	.	Name=DARACWW_2:13491043-13491057(-)+;Alias=MEME-1;ID=DARACWW-MEME-1-1-2:13491043-13491057(-);pvalue=0.0017;qvalue=0.0732;sequence=AAAACAT;
2	fimo	nucleotide_motif	13528326	13528332	21.8	+	.	Name=DARACWW_2:13528320-13528333(+)+;Alias=MEME-1;ID=DARACWW-MEME-1-1-2:13528320-13528333(+);pvalue=0.00665;qvalue=0.0986;sequence=AAGACAG;
2	fimo	nucleotide_motif	13528338	13528344	25.2	+	.	Name=DARACWW_2:13528334-13528347(+)+;Alias=MEME-1;ID=DARACWW-MEME-1-1-2:13528334-13528347(+);pvalue=0.003;qvalue=0.0822;sequence=GAGACTG;
2	fimo	nucleotide_motif	13528360	13528366	22.5	+	.	Name=DARACWW_2:13528356-13528369(+)+;Alias=MEME-1;ID=DARACWW-MEME-1-1-2:13528356-13528369(+);pvalue=0.00567;qvalue=0.0952;sequence=GTGACTT;
2	fimo	nucleotide_motif	13528374	13528380	23.3	+	.	Name=DARACWW_2:13528368-13528381(+)+;Alias=MEME-1;ID=DARACWW-MEME-1-1-2:13528368-13528381(+);pvalue=0.00471;qvalue=0.0905;sequence=GAAACAA;
2	fimo	nucleotide_motif	13639084	13639090	22.9	-	.	Name=DARACWW_2:13639080-13639093(-)+;Alias=MEME-1;ID=DARACWW-MEME-1-1-2:13639080-13639093(-);pvalue=0.00513;qvalue=0.0914;sequence=GGAACAT;
2	fimo	nucleotide_motif	13639095	13639101	21.9	-	.	Name=DARACWW_2:13639090-13639103(-)+;Alias=MEME-1;ID=DARACWW-MEME-1-1-2:13639090-13639103(-);pvalue=0.00642;qvalue=0.0978;sequence=GAGATTT;
2	fimo	nucleotide_motif	13639107	13639113	25.5	-	.	Name=DARACWW_2:13639103-13639116(-)+;Alias=MEME-1;ID=DARACWW-MEME-1-1-2:13639103-13639116(-);pvalue=0.00281;qvalue=0.0801;sequence=TGGACAT;
2	fimo	nucleotide_motif	13788649	13788655	34	-	.	Name=DARACWW_2:13788643-13788656(-)+;Alias=MEME-1;ID=DARACWW-MEME-1-1-2:13788643-13788656(-);pvalue=0.0004;qvalue=0.0508;sequence=GAAACTT;
2	fimo	nucleotide_motif	13805743	13805749	24.7	-	.	Name=DARACWW_2:13805739-13805752(-)+;Alias=MEME-1;ID=DARACWW-MEME-1-1-2:13805739-13805752(-);pvalue=0.00342;qvalue=0.0846;sequence=AGGACAT;
2	fimo	nucleotide_motif	13818282	13818288	26.7	+	.	Name=DARACWW_2:13818276-13818289(+)+;Alias=MEME-1;ID=DARACWW-MEME-1-1-2:13818276-13818289(+);pvalue=0.00212;qvalue=0.0766;sequence=GAAACTA;
2	fimo	nucleotide_motif	13847024	13847030	26	-	.	Name=DARACWW_2:13847020-13847033(-)+;Alias=MEME-1;ID=DARACWW-MEME-1-1-2:13847020-13847033(-);pvalue=0.00252;qvalue=0.0778;sequence=AAAACTC;
2	fimo	nucleotide_motif	13852002	13852008	34	+	.	Name=DARACWW_2:13851997-13852010(+)+;Alias=MEME-1;ID=DARACWW-MEME-1-1-2:13851997-13852010(+);pvalue=0.0004;qvalue=0.0508;sequence=GAAACTT;
2	fimo	nucleotide_motif	13871903	13871909	28.9	+	.	Name=DARACWW_2:13871899-13871912(+)+;Alias=MEME-1;ID=DARACWW-MEME-1-1-2:13871899-13871912(+);pvalue=0.00128;qvalue=0.0722;sequence=AGGACTT;
2	fimo	nucleotide_motif	13875802	13875808	22.1	+	.	Name=DARACWW_2:13875796-13875809(+)+;Alias=MEME-1;ID=DARACWW-MEME-1-1-2:13875796-13875809(+);pvalue=0.00612;qvalue=0.0968;sequence=CAAACTC;
2	fimo	nucleotide_motif	13919214	13919220	24.1	-	.	Name=DARACWW_2:13919212-13919225(-)+;Alias=MEME-1;ID=DARACWW-MEME-1-1-2:13919212-13919225(-);pvalue=0.00384;qvalue=0.0872;sequence=CAGACTC;
2	fimo	nucleotide_motif	14018829	14018835	28.2	-	.	Name=DARACWW_2:14018825-14018839(-)+;Alias=MEME-1;ID=DARACWW-MEME-1-1-2:14018825-14018839(-);pvalue=0.00151;qvalue=0.0732;sequence=TAAACAT;
2	fimo	nucleotide_motif	14018862	14018868	24.3	-	.	Name=DARACWW_2:14018858-14018871(-)+;Alias=MEME-1;ID=DARACWW-MEME-1-1-2:14018858-14018871(-);pvalue=0.00367;qvalue=0.0857;sequence=GAGACCT;
2	fimo	nucleotide_motif	14075016	14075022	24.3	-	.	Name=DARACWW_2:14075014-14075027(-)+;Alias=MEME-1;ID=DARACWW-MEME-1-1-2:14075014-14075027(-);pvalue=0.00367;qvalue=0.0857;sequence=AAGACAC;
2	fimo	nucleotide_motif	14098662	14098668	23.6	+	.	Name=DARACWW_2:14098656-14098669(+)+;Alias=MEME-1;ID=DARACWW-MEME-1-1-2:14098656-14098669(+);pvalue=0.00439;qvalue=0.0905;sequence=CAAACAT;
2	fimo	nucleotide_motif	14100531	14100537	23.6	+	.	Name=DARACWW_2:14100525-14100538(+)+;Alias=MEME-1;ID=DARACWW-MEME-1-1-2:14100525-14100538(+);pvalue=0.00439;qvalue=0.0905;sequence=CAAACAT;
2	fimo	nucleotide_motif	14143585	14143591	21.9	-	.	Name=DARACWW_2:14143580-14143593(-)+;Alias=MEME-1;ID=DARACWW-MEME-1-1-2:14143580-14143593(-);pvalue=0.00642;qvalue=0.0978;sequence=GAGATTT;
2	fimo	nucleotide_motif	14143607	14143613	25.6	-	.	Name=DARACWW_2:14143603-14143616(-)+;Alias=MEME-1;ID=DARACWW-MEME-1-1-2:14143603-14143616(-);pvalue=0.00274;qvalue=0.0794;sequence=CAGACAT;
2	fimo	nucleotide_motif	14144867	14144873	27.4	-	.	Name=DARACWW_2:14144863-14144876(-)+;Alias=MEME-1;ID=DARACWW-MEME-1-1-2:14144863-14144876(-);pvalue=0.0018;qvalue=0.0746;sequence=TAAACTA;
2	fimo	nucleotide_motif	14174510	14174516	36.5	+	.	Name=DARACWW_2:14174506-14174519(+)+;Alias=MEME-1;ID=DARACWW-MEME-1-1-2:14174506-14174519(+);pvalue=0.000224;qvalue=0.0467;sequence=AAGACTT;
2	fimo	nucleotide_motif	14174533	14174539	22.1	+	.	Name=DARACWW_2:14174531-14174544(+)+;Alias=MEME-1;ID=DARACWW-MEME-1-1-2:14174531-14174544(+);pvalue=0.00612;qvalue=0.0968;sequence=CAAACTC;
2	fimo	nucleotide_motif	14231205	14231211	22.2	+	.	Name=DARACWW_2:14231201-14231214(+)+;Alias=MEME-1;ID=DARACWW-MEME-1-1-2:14231201-14231214(+);pvalue=0.00599;qvalue=0.0965;sequence=ATGACTT;
2	fimo	nucleotide_motif	14236878	14236884	22.5	-	.	Name=DARACWW_2:14236875-14236888(-)+;Alias=MEME-1;ID=DARACWW-MEME-1-1-2:14236875-14236888(-);pvalue=0.00567;qvalue=0.0952;sequence=AAAACAC;
2	fimo	nucleotide_motif	14265528	14265534	34	-	.	Name=DARACWW_2:14265524-14265537(-)+;Alias=MEME-1;ID=DARACWW-MEME-1-1-2:14265524-14265537(-);pvalue=0.0004;qvalue=0.0508;sequence=GAAACTT;
2	fimo	nucleotide_motif	14300879	14300885	21.9	-	.	Name=DARACWW_2:14300874-14300887(-)+;Alias=MEME-1;ID=DARACWW-MEME-1-1-2:14300874-14300887(-);pvalue=0.00642;qvalue=0.0978;sequence=GAGATTT;
2	fimo	nucleotide_motif	14317405	14317411	26	+	.	Name=DARACWW_2:14317401-14317414(+)+;Alias=MEME-1;ID=DARACWW-MEME-1-1-2:14317401-14317414(+);pvalue=0.00252;qvalue=0.0778;sequence=AAAACTC;
2	fimo	nucleotide_motif	14464682	14464688	30.9	+	.	Name=DARACWW_2:14464676-14464689(+)+;Alias=MEME-1;ID=DARACWW-MEME-1-1-2:14464676-14464689(+);pvalue=0.000818;qvalue=0.0606;sequence=TAGACTA;
2	fimo	nucleotide_motif	14464763	14464769	33	+	.	Name=DARACWW_2:14464755-14464769(+)+;Alias=MEME-1;ID=DARACWW-MEME-1-1-2:14464755-14464769(+);pvalue=0.0005;qvalue=0.0508;sequence=AAAACTT;
2	fimo	nucleotide_motif	14464826	14464832	23.7	+	.	Name=DARACWW_2:14464820-14464833(+)+;Alias=MEME-1;ID=DARACWW-MEME-1-1-2:14464820-14464833(+);pvalue=0.00431;qvalue=0.0905;sequence=TAAACAA;
2	fimo	nucleotide_motif	14477825	14477831	27.7	-	.	Name=DARACWW_2:14477823-14477836(-)+;Alias=MEME-1;ID=DARACWW-MEME-1-1-2:14477823-14477836(-);pvalue=0.0017;qvalue=0.0732;sequence=AAAACAT;
2	fimo	nucleotide_motif	14477839	14477845	23.6	-	.	Name=DARACWW_2:14477835-14477848(-)+;Alias=MEME-1;ID=DARACWW-MEME-1-1-2:14477835-14477848(-);pvalue=0.00439;qvalue=0.0905;sequence=CAAACAT;
2	fimo	nucleotide_motif	14530805	14530811	41.1	+	.	Name=DARACWW_2:14530799-14530812(+)+;Alias=MEME-1;ID=DARACWW-MEME-1-1-2:14530799-14530812(+);pvalue=7.71e-05;qvalue=0.0467;sequence=TAGACTT;
2	fimo	nucleotide_motif	14532744	14532750	22.2	-	.	Name=DARACWW_2:14532741-14532755(-)+;Alias=MEME-1;ID=DARACWW-MEME-1-1-2:14532741-14532755(-);pvalue=0.00599;qvalue=0.0965;sequence=AAAACCT;
2	fimo	nucleotide_motif	14532793	14532799	22	-	.	Name=DARACWW_2:14532783-14532800(-)+;Alias=MEME-1;ID=DARACWW-MEME-1-1-2:14532783-14532800(-);pvalue=0.00626;qvalue=0.0978;sequence=TGAACTC;
2	fimo	nucleotide_motif	14562821	14562827	23.9	+	.	Name=DARACWW_2:14562816-14562831(+)+;Alias=MEME-1;ID=DARACWW-MEME-1-1-2:14562816-14562831(+);pvalue=0.00407;qvalue=0.0905;sequence=GGGACTC;
2	fimo	nucleotide_motif	14568867	14568873	26	-	.	Name=DARACWW_2:14568862-14568876(-)+;Alias=MEME-1;ID=DARACWW-MEME-1-1-2:14568862-14568876(-);pvalue=0.00252;qvalue=0.0778;sequence=AAAACTC;
2	fimo	nucleotide_motif	14649875	14649881	26.5	-	.	Name=DARACWW_2:14649871-14649884(-)+;Alias=MEME-1;ID=DARACWW-MEME-1-1-2:14649871-14649884(-);pvalue=0.00222;qvalue=0.0769;sequence=AAAACTA;
2	fimo	nucleotide_motif	14649901	14649907	35	-	.	Name=DARACWW_2:14649897-14649910(-)+;Alias=MEME-1;ID=DARACWW-MEME-1-1-2:14649897-14649910(-);pvalue=0.000319;qvalue=0.0508;sequence=TAAACTT;
2	fimo	nucleotide_motif	14660324	14660330	28	-	.	Name=DARACWW_2:14660320-14660333(-)+;Alias=MEME-1;ID=DARACWW-MEME-1-1-2:14660320-14660333(-);pvalue=0.00159;qvalue=0.0732;sequence=GAAACAT;
2	fimo	nucleotide_motif	14660353	14660359	23	-	.	Name=DARACWW_2:14660350-14660364(-)+;Alias=MEME-1;ID=DARACWW-MEME-1-1-2:14660350-14660364(-);pvalue=0.00506;qvalue=0.0905;sequence=AAAACTG;
2	fimo	nucleotide_motif	14660378	14660384	23.3	-	.	Name=DARACWW_2:14660374-14660387(-)+;Alias=MEME-1;ID=DARACWW-MEME-1-1-2:14660374-14660387(-);pvalue=0.00471;qvalue=0.0905;sequence=GAAACAA;
2	fimo	nucleotide_motif	14668074	14668080	26.5	+	.	Name=DARACWW_2:14668066-14668080(+)+;Alias=MEME-1;ID=DARACWW-MEME-1-1-2:14668066-14668080(+);pvalue=0.00222;qvalue=0.0769;sequence=AAAACTA;
2	fimo	nucleotide_motif	14710088	14710094	28.2	+	.	Name=DARACWW_2:14710082-14710095(+)+;Alias=MEME-1;ID=DARACWW-MEME-1-1-2:14710082-14710095(+);pvalue=0.00151;qvalue=0.0732;sequence=TAAACAT;
2	fimo	nucleotide_motif	14710117	14710123	24.7	+	.	Name=DARACWW_2:14710111-14710124(+)+;Alias=MEME-1;ID=DARACWW-MEME-1-1-2:14710111-14710124(+);pvalue=0.00342;qvalue=0.0846;sequence=CAGACTA;
2	fimo	nucleotide_motif	14765248	14765254	23	-	.	Name=DARACWW_2:14765244-14765257(-)+;Alias=MEME-1;ID=DARACWW-MEME-1-1-2:14765244-14765257(-);pvalue=0.00506;qvalue=0.0905;sequence=AAAACTG;
2	fimo	nucleotide_motif	14845004	14845010	29.7	-	.	Name=DARACWW_2:14845002-14845015(-)+;Alias=MEME-1;ID=DARACWW-MEME-1-1-2:14845002-14845015(-);pvalue=0.00108;qvalue=0.0664;sequence=TAGACTC;
2	fimo	nucleotide_motif	14851771	14851777	21.9	+	.	Name=DARACWW_2:14851766-14851779(+)+;Alias=MEME-1;ID=DARACWW-MEME-1-1-2:14851766-14851779(+);pvalue=0.00642;qvalue=0.0978;sequence=AGAACTA;
2	fimo	nucleotide_motif	14892167	14892173	24.3	+	.	Name=DARACWW_2:14892163-14892176(+)+;Alias=MEME-1;ID=DARACWW-MEME-1-1-2:14892163-14892176(+);pvalue=0.00367;qvalue=0.0857;sequence=GAGACCT;
2	fimo	nucleotide_motif	14912243	14912249	31.9	-	.	Name=DARACWW_2:14912237-14912250(-)+;Alias=MEME-1;ID=DARACWW-MEME-1-1-2:14912237-14912250(-);pvalue=0.000651;qvalue=0.0555;sequence=GAGACAT;
2	fimo	nucleotide_motif	14916831	14916837	22.5	-	.	Name=DARACWW_2:14916827-14916840(-)+;Alias=MEME-1;ID=DARACWW-MEME-1-1-2:14916827-14916840(-);pvalue=0.00567;qvalue=0.0952;sequence=GTGACTT;
2	fimo	nucleotide_motif	14922756	14922762	21.9	+	.	Name=DARACWW_2:14922753-14922766(+)+;Alias=MEME-1;ID=DARACWW-MEME-1-1-2:14922753-14922766(+);pvalue=0.00642;qvalue=0.0978;sequence=GAGATTT;
2	fimo	nucleotide_motif	14947128	14947134	30.9	+	.	Name=DARACWW_2:14947122-14947135(+)+;Alias=MEME-1;ID=DARACWW-MEME-1-1-2:14947122-14947135(+);pvalue=0.000818;qvalue=0.0606;sequence=TAGACTA;
2	fimo	nucleotide_motif	14960992	14960998	22.7	-	.	Name=DARACWW_2:14960988-14961001(-)+;Alias=MEME-1;ID=DARACWW-MEME-1-1-2:14960988-14961001(-);pvalue=0.00537;qvalue=0.0935;sequence=GAAACAC;
2	fimo	nucleotide_motif	14981966	14981972	23.6	+	.	Name=DARACWW_2:14981960-14981973(+)+;Alias=MEME-1;ID=DARACWW-MEME-1-1-2:14981960-14981973(+);pvalue=0.00439;qvalue=0.0905;sequence=CAAACAT;
2	fimo	nucleotide_motif	14996769	14996775	28.2	-	.	Name=DARACWW_2:14996765-14996778(-)+;Alias=MEME-1;ID=DARACWW-MEME-1-1-2:14996765-14996778(-);pvalue=0.00151;qvalue=0.0732;sequence=TAAACAT;
2	fimo	nucleotide_motif	14996839	14996845	33	-	.	Name=DARACWW_2:14996838-14996855(-)+;Alias=MEME-1;ID=DARACWW-MEME-1-1-2:14996838-14996855(-);pvalue=0.0005;qvalue=0.0508;sequence=AAAACTT;
2	fimo	nucleotide_motif	15037721	15037727	24.3	-	.	Name=DARACWW_2:15037717-15037730(-)+;Alias=MEME-1;ID=DARACWW-MEME-1-1-2:15037717-15037730(-);pvalue=0.00367;qvalue=0.0857;sequence=AAGACAC;
2	fimo	nucleotide_motif	15043351	15043357	36.5	+	.	Name=DARACWW_2:15043347-15043361(+)+;Alias=MEME-1;ID=DARACWW-MEME-1-1-2:15043347-15043361(+);pvalue=0.000224;qvalue=0.0467;sequence=AAGACTT;
2	fimo	nucleotide_motif	15055912	15055918	26	+	.	Name=DARACWW_2:15055908-15055923(+)+;Alias=MEME-1;ID=DARACWW-MEME-1-1-2:15055908-15055923(+);pvalue=0.00252;qvalue=0.0778;sequence=AAAACTC;
2	fimo	nucleotide_motif	15142933	15142939	23	-	.	Name=DARACWW_2:15142930-15142943(-)+;Alias=MEME-1;ID=DARACWW-MEME-1-1-2:15142930-15142943(-);pvalue=0.00506;qvalue=0.0905;sequence=AAAACAA;
2	fimo	nucleotide_motif	15168362	15168368	25.7	+	.	Name=DARACWW_2:15168356-15168369(+)+;Alias=MEME-1;ID=DARACWW-MEME-1-1-2:15168356-15168369(+);pvalue=0.00267;qvalue=0.0794;sequence=TAGACTG;
2	fimo	nucleotide_motif	15169371	15169377	28.2	+	.	Name=DARACWW_2:15169365-15169378(+)+;Alias=MEME-1;ID=DARACWW-MEME-1-1-2:15169365-15169378(+);pvalue=0.00151;qvalue=0.0732;sequence=TAAACAT;
2	fimo	nucleotide_motif	15169462	15169468	31.9	+	.	Name=DARACWW_2:15169458-15169471(+)+;Alias=MEME-1;ID=DARACWW-MEME-1-1-2:15169458-15169471(+);pvalue=0.000651;qvalue=0.0555;sequence=GAGACAT;
2	fimo	nucleotide_motif	15173098	15173104	28.5	+	.	Name=DARACWW_2:15173092-15173105(+)+;Alias=MEME-1;ID=DARACWW-MEME-1-1-2:15173092-15173105(+);pvalue=0.00141;qvalue=0.0732;sequence=AAGACTC;
2	fimo	nucleotide_motif	15197174	15197180	27.4	+	.	Name=DARACWW_2:15197173-15197186(+)+;Alias=MEME-1;ID=DARACWW-MEME-1-1-2:15197173-15197186(+);pvalue=0.0018;qvalue=0.0746;sequence=TAAACTA;
2	fimo	nucleotide_motif	15197409	15197415	28.2	-	.	Name=DARACWW_2:15197406-15197419(-)+;Alias=MEME-1;ID=DARACWW-MEME-1-1-2:15197406-15197419(-);pvalue=0.00151;qvalue=0.0732;sequence=TAAACAT;
2	fimo	nucleotide_motif	15280488	15280494	26.1	+	.	Name=DARACWW_2:15280485-15280498(+)+;Alias=MEME-1;ID=DARACWW-MEME-1-1-2:15280485-15280498(+);pvalue=0.00244;qvalue=0.0778;sequence=GAAACTC;
2	fimo	nucleotide_motif	15320906	15320912	28	-	.	Name=DARACWW_2:15320904-15320917(-)+;Alias=MEME-1;ID=DARACWW-MEME-1-1-2:15320904-15320917(-);pvalue=0.00159;qvalue=0.0732;sequence=GAAACAT;
2	fimo	nucleotide_motif	15350421	15350427	33	-	.	Name=DARACWW_2:15350417-15350431(-)+;Alias=MEME-1;ID=DARACWW-MEME-1-1-2:15350417-15350431(-);pvalue=0.0005;qvalue=0.0508;sequence=AAAACTT;
2	fimo	nucleotide_motif	15368918	15368924	23.7	-	.	Name=DARACWW_2:15368914-15368927(-)+;Alias=MEME-1;ID=DARACWW-MEME-1-1-2:15368914-15368927(-);pvalue=0.00431;qvalue=0.0905;sequence=TAAACAA;
2	fimo	nucleotide_motif	15454883	15454889	32.3	-	.	Name=DARACWW_2:15454881-15454894(-)+;Alias=MEME-1;ID=DARACWW-MEME-1-1-2:15454881-15454894(-);pvalue=0.000582;qvalue=0.0548;sequence=TAGACAT;
2	fimo	nucleotide_motif	15507128	15507134	26	+	.	Name=DARACWW_2:15507123-15507137(+)+;Alias=MEME-1;ID=DARACWW-MEME-1-1-2:15507123-15507137(+);pvalue=0.00252;qvalue=0.0778;sequence=AAAACTC;
2	fimo	nucleotide_motif	15509943	15509949	26.5	-	.	Name=DARACWW_2:15509937-15509950(-)+;Alias=MEME-1;ID=DARACWW-MEME-1-1-2:15509937-15509950(-);pvalue=0.00222;qvalue=0.0769;sequence=AAAACTA;
2	fimo	nucleotide_motif	15581483	15581489	32.3	-	.	Name=DARACWW_2:15581479-15581492(-)+;Alias=MEME-1;ID=DARACWW-MEME-1-1-2:15581479-15581492(-);pvalue=0.000582;qvalue=0.0548;sequence=TAGACAT;
2	fimo	nucleotide_motif	15593907	15593913	23	+	.	Name=DARACWW_2:15593900-15593913(+)+;Alias=MEME-1;ID=DARACWW-MEME-1-1-2:15593900-15593913(+);pvalue=0.00506;qvalue=0.0905;sequence=AAAACAA;
2	fimo	nucleotide_motif	15593911	15593917	23.6	+	.	Name=DARACWW_2:15593905-15593918(+)+;Alias=MEME-1;ID=DARACWW-MEME-1-1-2:15593905-15593918(+);pvalue=0.00439;qvalue=0.0905;sequence=CAAACAT;
2	fimo	nucleotide_motif	15594143	15594149	30.9	-	.	Name=DARACWW_2:15594141-15594154(-)+;Alias=MEME-1;ID=DARACWW-MEME-1-1-2:15594141-15594154(-);pvalue=0.000818;qvalue=0.0606;sequence=TAGACTA;
2	fimo	nucleotide_motif	15634695	15634701	23.3	-	.	Name=DARACWW_2:15634691-15634704(-)+;Alias=MEME-1;ID=DARACWW-MEME-1-1-2:15634691-15634704(-);pvalue=0.00471;qvalue=0.0905;sequence=GAAACTG;
2	fimo	nucleotide_motif	15670234	15670240	31.9	-	.	Name=DARACWW_2:15670230-15670243(-)+;Alias=MEME-1;ID=DARACWW-MEME-1-1-2:15670230-15670243(-);pvalue=0.000651;qvalue=0.0555;sequence=GAGACAT;
2	fimo	nucleotide_motif	15755208	15755214	27.4	-	.	Name=DARACWW_2:15755204-15755217(-)+;Alias=MEME-1;ID=DARACWW-MEME-1-1-2:15755204-15755217(-);pvalue=0.0018;qvalue=0.0746;sequence=TAAACTA;
2	fimo	nucleotide_motif	15781682	15781688	41.1	-	.	Name=DARACWW_2:15781680-15781693(-)+;Alias=MEME-1;ID=DARACWW-MEME-1-1-2:15781680-15781693(-);pvalue=7.71e-05;qvalue=0.0467;sequence=TAGACTT;
2	fimo	nucleotide_motif	15833785	15833791	24.7	+	.	Name=DARACWW_2:15833777-15833791(+)+;Alias=MEME-1;ID=DARACWW-MEME-1-1-2:15833777-15833791(+);pvalue=0.00342;qvalue=0.0846;sequence=AGGACAT;
2	fimo	nucleotide_motif	15903144	15903150	23	+	.	Name=DARACWW_2:15903140-15903153(+)+;Alias=MEME-1;ID=DARACWW-MEME-1-1-2:15903140-15903153(+);pvalue=0.00506;qvalue=0.0905;sequence=TTGACTT;
2	fimo	nucleotide_motif	15920978	15920984	22.9	+	.	Name=DARACWW_2:15920973-15920986(+)+;Alias=MEME-1;ID=DARACWW-MEME-1-1-2:15920973-15920986(+);pvalue=0.00513;qvalue=0.0914;sequence=GGAACAT;
2	fimo	nucleotide_motif	15921014	15921020	23	+	.	Name=DARACWW_2:15921010-15921023(+)+;Alias=MEME-1;ID=DARACWW-MEME-1-1-2:15921010-15921023(+);pvalue=0.00506;qvalue=0.0905;sequence=TTGACTT;
2	fimo	nucleotide_motif	15921119	15921125	22.2	+	.	Name=DARACWW_2:15921112-15921125(+)+;Alias=MEME-1;ID=DARACWW-MEME-1-1-2:15921112-15921125(+);pvalue=0.00599;qvalue=0.0965;sequence=AAAACCT;
2	fimo	nucleotide_motif	15981547	15981553	27.7	+	.	Name=DARACWW_2:15981540-15981555(+)+;Alias=MEME-1;ID=DARACWW-MEME-1-1-2:15981540-15981555(+);pvalue=0.0017;qvalue=0.0732;sequence=AAAACAT;
2	fimo	nucleotide_motif	15989196	15989202	22.5	-	.	Name=DARACWW_2:15989192-15989205(-)+;Alias=MEME-1;ID=DARACWW-MEME-1-1-2:15989192-15989205(-);pvalue=0.00567;qvalue=0.0952;sequence=TGAACTA;
2	fimo	nucleotide_motif	15989234	15989240	26.2	-	.	Name=DARACWW_2:15989230-15989243(-)+;Alias=MEME-1;ID=DARACWW-MEME-1-1-2:15989230-15989243(-);pvalue=0.00237;qvalue=0.0778;sequence=AGAACTT;
2	fimo	nucleotide_motif	16031365	16031371	27.1	-	.	Name=DARACWW_2:16031362-16031375(-)+;Alias=MEME-1;ID=DARACWW-MEME-1-1-2:16031362-16031375(-);pvalue=0.00195;qvalue=0.0766;sequence=TGAACTT;
2	fimo	nucleotide_motif	16100946	16100952	25.6	+	.	Name=DARACWW_2:16100942-16100955(+)+;Alias=MEME-1;ID=DARACWW-MEME-1-1-2:16100942-16100955(+);pvalue=0.00274;qvalue=0.0794;sequence=CAGACAT;
2	fimo	nucleotide_motif	16147161	16147167	22.5	-	.	Name=DARACWW_2:16147159-16147172(-)+;Alias=MEME-1;ID=DARACWW-MEME-1-1-2:16147159-16147172(-);pvalue=0.00567;qvalue=0.0952;sequence=AAAACAC;
2	fimo	nucleotide_motif	16147168	16147174	23.7	-	.	Name=DARACWW_2:16147164-16147177(-)+;Alias=MEME-1;ID=DARACWW-MEME-1-1-2:16147164-16147177(-);pvalue=0.00431;qvalue=0.0905;sequence=TAAACAA;
2	fimo	nucleotide_motif	16147174	16147180	28.2	-	.	Name=DARACWW_2:16147170-16147184(-)+;Alias=MEME-1;ID=DARACWW-MEME-1-1-2:16147170-16147184(-);pvalue=0.00151;qvalue=0.0732;sequence=TAAACAT;
2	fimo	nucleotide_motif	16219008	16219014	35	+	.	Name=DARACWW_2:16219002-16219015(+)+;Alias=MEME-1;ID=DARACWW-MEME-1-1-2:16219002-16219015(+);pvalue=0.000319;qvalue=0.0508;sequence=TAAACTT;
2	fimo	nucleotide_motif	16219093	16219099	24.3	+	.	Name=DARACWW_2:16219089-16219102(+)+;Alias=MEME-1;ID=DARACWW-MEME-1-1-2:16219089-16219102(+);pvalue=0.00367;qvalue=0.0857;sequence=TGGACTA;
2	fimo	nucleotide_motif	16309893	16309899	22.1	-	.	Name=DARACWW_2:16309886-16309900(-)+;Alias=MEME-1;ID=DARACWW-MEME-1-1-2:16309886-16309900(-);pvalue=0.00612;qvalue=0.0968;sequence=CAAACTC;
2	fimo	nucleotide_motif	16334687	16334693	25.2	-	.	Name=DARACWW_2:16334683-16334696(-)+;Alias=MEME-1;ID=DARACWW-MEME-1-1-2:16334683-16334696(-);pvalue=0.003;qvalue=0.0822;sequence=GAGACTG;
2	fimo	nucleotide_motif	16355945	16355951	24.3	+	.	Name=DARACWW_2:16355939-16355952(+)+;Alias=MEME-1;ID=DARACWW-MEME-1-1-2:16355939-16355952(+);pvalue=0.00367;qvalue=0.0857;sequence=GAGACCT;
2	fimo	nucleotide_motif	16471665	16471671	25.7	-	.	Name=DARACWW_2:16471661-16471674(-)+;Alias=MEME-1;ID=DARACWW-MEME-1-1-2:16471661-16471674(-);pvalue=0.00267;qvalue=0.0794;sequence=TAGACAA;
2	fimo	nucleotide_motif	16475928	16475934	29.3	+	.	Name=DARACWW_2:16475920-16475935(+)+;Alias=MEME-1;ID=DARACWW-MEME-1-1-2:16475920-16475935(+);pvalue=0.00116;qvalue=0.0681;sequence=AAGACTA;
2	fimo	nucleotide_motif	16489466	16489472	24.1	+	.	Name=DARACWW_2:16489460-16489473(+)+;Alias=MEME-1;ID=DARACWW-MEME-1-1-2:16489460-16489473(+);pvalue=0.00384;qvalue=0.0872;sequence=CAGACTC;
2	fimo	nucleotide_motif	16593591	16593597	22.2	+	.	Name=DARACWW_2:16593586-16593599(+)+;Alias=MEME-1;ID=DARACWW-MEME-1-1-2:16593586-16593599(+);pvalue=0.00599;qvalue=0.0965;sequence=AAAACCT;
2	fimo	nucleotide_motif	16617897	16617903	25.2	+	.	Name=DARACWW_2:16617893-16617906(+)+;Alias=MEME-1;ID=DARACWW-MEME-1-1-2:16617893-16617906(+);pvalue=0.003;qvalue=0.0822;sequence=GAGACTG;
2	fimo	nucleotide_motif	16645328	16645334	27.7	+	.	Name=DARACWW_2:16645321-16645334(+)+;Alias=MEME-1;ID=DARACWW-MEME-1-1-2:16645321-16645334(+);pvalue=0.0017;qvalue=0.0732;sequence=AAAACAT;
2	fimo	nucleotide_motif	16676708	16676714	26	-	.	Name=DARACWW_2:16676702-16676715(-)+;Alias=MEME-1;ID=DARACWW-MEME-1-1-2:16676702-16676715(-);pvalue=0.00252;qvalue=0.0778;sequence=AAAACTC;
2	fimo	nucleotide_motif	16681574	16681580	26.7	-	.	Name=DARACWW_2:16681570-16681583(-)+;Alias=MEME-1;ID=DARACWW-MEME-1-1-2:16681570-16681583(-);pvalue=0.00212;qvalue=0.0766;sequence=GAAACTA;
2	fimo	nucleotide_motif	16681592	16681598	22.5	-	.	Name=DARACWW_2:16681588-16681601(-)+;Alias=MEME-1;ID=DARACWW-MEME-1-1-2:16681588-16681601(-);pvalue=0.00567;qvalue=0.0952;sequence=GTGACTT;
2	fimo	nucleotide_motif	16698198	16698204	24.9	-	.	Name=DARACWW_2:16698196-16698211(-)+;Alias=MEME-1;ID=DARACWW-MEME-1-1-2:16698196-16698211(-);pvalue=0.00323;qvalue=0.0822;sequence=AAGACAA;
2	fimo	nucleotide_motif	16728084	16728090	21.9	+	.	Name=DARACWW_2:16728081-16728094(+)+;Alias=MEME-1;ID=DARACWW-MEME-1-1-2:16728081-16728094(+);pvalue=0.00642;qvalue=0.0978;sequence=GAGATTT;
2	fimo	nucleotide_motif	16828940	16828946	22.2	-	.	Name=DARACWW_2:16828937-16828950(-)+;Alias=MEME-1;ID=DARACWW-MEME-1-1-2:16828937-16828950(-);pvalue=0.00599;qvalue=0.0965;sequence=AAAACCT;
2	fimo	nucleotide_motif	16831405	16831411	41.1	-	.	Name=DARACWW_2:16831401-16831414(-)+;Alias=MEME-1;ID=DARACWW-MEME-1-1-2:16831401-16831414(-);pvalue=7.71e-05;qvalue=0.0467;sequence=TAGACTT;
2	fimo	nucleotide_motif	16872684	16872690	23.3	+	.	Name=DARACWW_2:16872678-16872691(+)+;Alias=MEME-1;ID=DARACWW-MEME-1-1-2:16872678-16872691(+);pvalue=0.00471;qvalue=0.0905;sequence=GAAACAA;
2	fimo	nucleotide_motif	16875264	16875270	24.9	+	.	Name=DARACWW_2:16875257-16875271(+)+;Alias=MEME-1;ID=DARACWW-MEME-1-1-2:16875257-16875271(+);pvalue=0.00323;qvalue=0.0822;sequence=AAGACAA;
2	fimo	nucleotide_motif	16875359	16875365	31.9	+	.	Name=DARACWW_2:16875355-16875368(+)+;Alias=MEME-1;ID=DARACWW-MEME-1-1-2:16875355-16875368(+);pvalue=0.000651;qvalue=0.0555;sequence=GAGACAT;
2	fimo	nucleotide_motif	16915110	16915116	30.9	+	.	Name=DARACWW_2:16915104-16915117(+)+;Alias=MEME-1;ID=DARACWW-MEME-1-1-2:16915104-16915117(+);pvalue=0.000818;qvalue=0.0606;sequence=TAGACTA;
2	fimo	nucleotide_motif	16919731	16919737	22.8	+	.	Name=DARACWW_2:16919724-16919740(+)+;Alias=MEME-1;ID=DARACWW-MEME-1-1-2:16919724-16919740(+);pvalue=0.0053;qvalue=0.093;sequence=CAAACTA;
2	fimo	nucleotide_motif	16934513	16934519	23	+	.	Name=DARACWW_2:16934509-16934522(+)+;Alias=MEME-1;ID=DARACWW-MEME-1-1-2:16934509-16934522(+);pvalue=0.00506;qvalue=0.0905;sequence=TTGACTT;
2	fimo	nucleotide_motif	16945065	16945071	23	-	.	Name=DARACWW_2:16945061-16945075(-)+;Alias=MEME-1;ID=DARACWW-MEME-1-1-2:16945061-16945075(-);pvalue=0.00506;qvalue=0.0905;sequence=TAAACCT;
2	fimo	nucleotide_motif	17050882	17050888	31.3	+	.	Name=DARACWW_2:17050875-17050889(+)+;Alias=MEME-1;ID=DARACWW-MEME-1-1-2:17050875-17050889(+);pvalue=0.000737;qvalue=0.0566;sequence=AAGACAT;
2	fimo	nucleotide_motif	17058036	17058042	34	+	.	Name=DARACWW_2:17058030-17058043(+)+;Alias=MEME-1;ID=DARACWW-MEME-1-1-2:17058030-17058043(+);pvalue=0.0004;qvalue=0.0508;sequence=GAAACTT;
2	fimo	nucleotide_motif	17058201	17058207	33	-	.	Name=DARACWW_2:17058195-17058208(-)+;Alias=MEME-1;ID=DARACWW-MEME-1-1-2:17058195-17058208(-);pvalue=0.0005;qvalue=0.0508;sequence=AAAACTT;
2	fimo	nucleotide_motif	17058230	17058236	32.3	-	.	Name=DARACWW_2:17058226-17058239(-)+;Alias=MEME-1;ID=DARACWW-MEME-1-1-2:17058226-17058239(-);pvalue=0.000582;qvalue=0.0548;sequence=TAGACAT;
2	fimo	nucleotide_motif	17141318	17141324	21.8	+	.	Name=DARACWW_2:17141312-17141327(+)+;Alias=MEME-1;ID=DARACWW-MEME-1-1-2:17141312-17141327(+);pvalue=0.00665;qvalue=0.0986;sequence=AAGACAG;
2	fimo	nucleotide_motif	17153585	17153591	31.9	+	.	Name=DARACWW_2:17153581-17153594(+)+;Alias=MEME-1;ID=DARACWW-MEME-1-1-2:17153581-17153594(+);pvalue=0.000651;qvalue=0.0555;sequence=GAGACAT;
2	fimo	nucleotide_motif	17266568	17266574	24.6	-	.	Name=DARACWW_2:17266563-17266577(-)+;Alias=MEME-1;ID=DARACWW-MEME-1-1-2:17266563-17266577(-);pvalue=0.00348;qvalue=0.0846;sequence=GAGACAC;
2	fimo	nucleotide_motif	17266723	17266729	22.2	-	.	Name=DARACWW_2:17266720-17266733(-)+;Alias=MEME-1;ID=DARACWW-MEME-1-1-2:17266720-17266733(-);pvalue=0.00599;qvalue=0.0965;sequence=AAAACCT;
2	fimo	nucleotide_motif	17270454	17270460	27.3	+	.	Name=DARACWW_2:17270449-17270462(+)+;Alias=MEME-1;ID=DARACWW-MEME-1-1-2:17270449-17270462(+);pvalue=0.00188;qvalue=0.0756;sequence=CAAACTT;
2	fimo	nucleotide_motif	17295229	17295235	28.9	-	.	Name=DARACWW_2:17295223-17295236(-)+;Alias=MEME-1;ID=DARACWW-MEME-1-1-2:17295223-17295236(-);pvalue=0.00128;qvalue=0.0722;sequence=AGGACTT;
2	fimo	nucleotide_motif	17295235	17295241	23	-	.	Name=DARACWW_2:17295232-17295245(-)+;Alias=MEME-1;ID=DARACWW-MEME-1-1-2:17295232-17295245(-);pvalue=0.00506;qvalue=0.0905;sequence=AAAACAA;
2	fimo	nucleotide_motif	17323584	17323590	30.2	-	.	Name=DARACWW_2:17323580-17323593(-)+;Alias=MEME-1;ID=DARACWW-MEME-1-1-2:17323580-17323593(-);pvalue=0.000945;qvalue=0.0635;sequence=TGGACTT;
2	fimo	nucleotide_motif	17376233	17376239	23.7	-	.	Name=DARACWW_2:17376229-17376242(-)+;Alias=MEME-1;ID=DARACWW-MEME-1-1-2:17376229-17376242(-);pvalue=0.00431;qvalue=0.0905;sequence=TAAACAA;
2	fimo	nucleotide_motif	17410757	17410763	21.8	-	.	Name=DARACWW_2:17410753-17410766(-)+;Alias=MEME-1;ID=DARACWW-MEME-1-1-2:17410753-17410766(-);pvalue=0.00658;qvalue=0.0983;sequence=GAGACAG;
2	fimo	nucleotide_motif	17429414	17429420	24.9	-	.	Name=DARACWW_2:17429412-17429425(-)+;Alias=MEME-1;ID=DARACWW-MEME-1-1-2:17429412-17429425(-);pvalue=0.00323;qvalue=0.0822;sequence=AAGACAA;
2	fimo	nucleotide_motif	17459893	17459899	22.8	-	.	Name=DARACWW_2:17459887-17459900(-)+;Alias=MEME-1;ID=DARACWW-MEME-1-1-2:17459887-17459900(-);pvalue=0.0053;qvalue=0.093;sequence=CAAACTA;
2	fimo	nucleotide_motif	17593421	17593427	21.9	+	.	Name=DARACWW_2:17593417-17593431(+)+;Alias=MEME-1;ID=DARACWW-MEME-1-1-2:17593417-17593431(+);pvalue=0.00652;qvalue=0.0978;sequence=AAGATTT;
2	fimo	nucleotide_motif	17593480	17593486	24.9	+	.	Name=DARACWW_2:17593474-17593487(+)+;Alias=MEME-1;ID=DARACWW-MEME-1-1-2:17593474-17593487(+);pvalue=0.00323;qvalue=0.0822;sequence=AAGACAA;
2	fimo	nucleotide_motif	17625689	17625695	24.9	+	.	Name=DARACWW_2:17625682-17625696(+)+;Alias=MEME-1;ID=DARACWW-MEME-1-1-2:17625682-17625696(+);pvalue=0.00323;qvalue=0.0822;sequence=AAGACTG;
2	fimo	nucleotide_motif	17625721	17625727	27.1	+	.	Name=DARACWW_2:17625716-17625729(+)+;Alias=MEME-1;ID=DARACWW-MEME-1-1-2:17625716-17625729(+);pvalue=0.00195;qvalue=0.0766;sequence=TGAACTT;
2	fimo	nucleotide_motif	17691473	17691479	29.3	-	.	Name=DARACWW_2:17691471-17691485(-)+;Alias=MEME-1;ID=DARACWW-MEME-1-1-2:17691471-17691485(-);pvalue=0.00116;qvalue=0.0681;sequence=AAGACTA;
2	fimo	nucleotide_motif	17731882	17731888	34	-	.	Name=DARACWW_2:17731878-17731891(-)+;Alias=MEME-1;ID=DARACWW-MEME-1-1-2:17731878-17731891(-);pvalue=0.0004;qvalue=0.0508;sequence=GAAACTT;
2	fimo	nucleotide_motif	17776256	17776262	26.7	+	.	Name=DARACWW_2:17776253-17776267(+)+;Alias=MEME-1;ID=DARACWW-MEME-1-1-2:17776253-17776267(+);pvalue=0.00212;qvalue=0.0766;sequence=TAAACTC;
2	fimo	nucleotide_motif	17795511	17795517	24.9	+	.	Name=DARACWW_2:17795505-17795518(+)+;Alias=MEME-1;ID=DARACWW-MEME-1-1-2:17795505-17795518(+);pvalue=0.00323;qvalue=0.0822;sequence=TAGACCT;
2	fimo	nucleotide_motif	17795553	17795559	23	+	.	Name=DARACWW_2:17795544-17795559(+)+;Alias=MEME-1;ID=DARACWW-MEME-1-1-2:17795544-17795559(+);pvalue=0.00506;qvalue=0.0905;sequence=AAAACAA;
2	fimo	nucleotide_motif	17812128	17812134	21.9	-	.	Name=DARACWW_2:17812123-17812136(-)+;Alias=MEME-1;ID=DARACWW-MEME-1-1-2:17812123-17812136(-);pvalue=0.00652;qvalue=0.0978;sequence=AAGATTT;
2	fimo	nucleotide_motif	17812267	17812273	28	-	.	Name=DARACWW_2:17812263-17812276(-)+;Alias=MEME-1;ID=DARACWW-MEME-1-1-2:17812263-17812276(-);pvalue=0.00159;qvalue=0.0732;sequence=GAAACAT;
2	fimo	nucleotide_motif	17854379	17854385	28	+	.	Name=DARACWW_2:17854373-17854386(+)+;Alias=MEME-1;ID=DARACWW-MEME-1-1-2:17854373-17854386(+);pvalue=0.00159;qvalue=0.0732;sequence=GAAACAT;
2	fimo	nucleotide_motif	17858430	17858436	30.2	+	.	Name=DARACWW_2:17858424-17858439(+)+;Alias=MEME-1;ID=DARACWW-MEME-1-1-2:17858424-17858439(+);pvalue=0.000945;qvalue=0.0635;sequence=TGGACTT;
2	fimo	nucleotide_motif	17858515	17858521	22.1	+	.	Name=DARACWW_2:17858509-17858522(+)+;Alias=MEME-1;ID=DARACWW-MEME-1-1-2:17858509-17858522(+);pvalue=0.00612;qvalue=0.0968;sequence=TAGACAG;
2	fimo	nucleotide_motif	17888886	17888892	23.5	+	.	Name=DARACWW_2:17888881-17888894(+)+;Alias=MEME-1;ID=DARACWW-MEME-1-1-2:17888881-17888894(+);pvalue=0.00447;qvalue=0.0905;sequence=TGAACAT;
2	fimo	nucleotide_motif	17894496	17894502	26.7	+	.	Name=DARACWW_2:17894490-17894503(+)+;Alias=MEME-1;ID=DARACWW-MEME-1-1-2:17894490-17894503(+);pvalue=0.00212;qvalue=0.0766;sequence=GAAACTA;
2	fimo	nucleotide_motif	17895721	17895727	28.7	+	.	Name=DARACWW_2:17895717-17895730(+)+;Alias=MEME-1;ID=DARACWW-MEME-1-1-2:17895717-17895730(+);pvalue=0.00134;qvalue=0.073;sequence=GAGACTC;
2	fimo	nucleotide_motif	17895745	17895751	23	+	.	Name=DARACWW_2:17895741-17895754(+)+;Alias=MEME-1;ID=DARACWW-MEME-1-1-2:17895741-17895754(+);pvalue=0.00506;qvalue=0.0905;sequence=TTGACTT;
2	fimo	nucleotide_motif	17911058	17911064	24.3	-	.	Name=DARACWW_2:17911057-17911070(-)+;Alias=MEME-1;ID=DARACWW-MEME-1-1-2:17911057-17911070(-);pvalue=0.00367;qvalue=0.0857;sequence=AAGACAC;
2	fimo	nucleotide_motif	17918610	17918616	33	+	.	Name=DARACWW_2:17918603-17918616(+)+;Alias=MEME-1;ID=DARACWW-MEME-1-1-2:17918603-17918616(+);pvalue=0.0005;qvalue=0.0508;sequence=AAAACTT;
2	fimo	nucleotide_motif	17929686	17929692	35	-	.	Name=DARACWW_2:17929682-17929695(-)+;Alias=MEME-1;ID=DARACWW-MEME-1-1-2:17929682-17929695(-);pvalue=0.000319;qvalue=0.0508;sequence=TAAACTT;
2	fimo	nucleotide_motif	18008666	18008672	28	-	.	Name=DARACWW_2:18008662-18008675(-)+;Alias=MEME-1;ID=DARACWW-MEME-1-1-2:18008662-18008675(-);pvalue=0.00159;qvalue=0.0732;sequence=GAAACAT;
2	fimo	nucleotide_motif	18046077	18046083	30.5	-	.	Name=DARACWW_2:18046075-18046088(-)+;Alias=MEME-1;ID=DARACWW-MEME-1-1-2:18046075-18046088(-);pvalue=0.000882;qvalue=0.0619;sequence=CAGACTT;
2	fimo	nucleotide_motif	18046170	18046176	38.4	-	.	Name=DARACWW_2:18046166-18046179(-)+;Alias=MEME-1;ID=DARACWW-MEME-1-1-2:18046166-18046179(-);pvalue=0.000143;qvalue=0.0467;sequence=GAGACTT;
2	fimo	nucleotide_motif	18073897	18073903	22.8	-	.	Name=DARACWW_2:18073893-18073906(-)+;Alias=MEME-1;ID=DARACWW-MEME-1-1-2:18073893-18073906(-);pvalue=0.0053;qvalue=0.093;sequence=AGAACAT;
2	fimo	nucleotide_motif	18097531	18097537	21.9	-	.	Name=DARACWW_2:18097526-18097539(-)+;Alias=MEME-1;ID=DARACWW-MEME-1-1-2:18097526-18097539(-);pvalue=0.00652;qvalue=0.0978;sequence=AAGATTT;
2	fimo	nucleotide_motif	18111600	18111606	23.5	+	.	Name=DARACWW_2:18111593-18111606(+)+;Alias=MEME-1;ID=DARACWW-MEME-1-1-2:18111593-18111606(+);pvalue=0.00447;qvalue=0.0905;sequence=TGAACAT;
2	fimo	nucleotide_motif	18133913	18133919	25.7	+	.	Name=DARACWW_2:18133907-18133920(+)+;Alias=MEME-1;ID=DARACWW-MEME-1-1-2:18133907-18133920(+);pvalue=0.00267;qvalue=0.0794;sequence=TAGACAA;
2	fimo	nucleotide_motif	18134197	18134203	31.9	-	.	Name=DARACWW_2:18134190-18134203(-)+;Alias=MEME-1;ID=DARACWW-MEME-1-1-2:18134190-18134203(-);pvalue=0.000651;qvalue=0.0555;sequence=GAGACAT;
2	fimo	nucleotide_motif	18189227	18189233	23.7	-	.	Name=DARACWW_2:18189223-18189236(-)+;Alias=MEME-1;ID=DARACWW-MEME-1-1-2:18189223-18189236(-);pvalue=0.00431;qvalue=0.0905;sequence=TAAACTG;
2	fimo	nucleotide_motif	18197913	18197919	23.7	-	.	Name=DARACWW_2:18197907-18197920(-)+;Alias=MEME-1;ID=DARACWW-MEME-1-1-2:18197907-18197920(-);pvalue=0.00431;qvalue=0.0905;sequence=TAAACAA;
2	fimo	nucleotide_motif	18205334	18205340	26.5	-	.	Name=DARACWW_2:18205327-18205346(-)+;Alias=MEME-1;ID=DARACWW-MEME-1-1-2:18205327-18205346(-);pvalue=0.00222;qvalue=0.0769;sequence=AAAACTA;
2	fimo	nucleotide_motif	18205345	18205351	23.3	-	.	Name=DARACWW_2:18205341-18205354(-)+;Alias=MEME-1;ID=DARACWW-MEME-1-1-2:18205341-18205354(-);pvalue=0.00471;qvalue=0.0905;sequence=GAAACAA;
2	fimo	nucleotide_motif	18205405	18205411	30.5	-	.	Name=DARACWW_2:18205403-18205416(-)+;Alias=MEME-1;ID=DARACWW-MEME-1-1-2:18205403-18205416(-);pvalue=0.000882;qvalue=0.0619;sequence=CAGACTT;
2	fimo	nucleotide_motif	18205441	18205447	21.9	-	.	Name=DARACWW_2:18205436-18205449(-)+;Alias=MEME-1;ID=DARACWW-MEME-1-1-2:18205436-18205449(-);pvalue=0.00642;qvalue=0.0978;sequence=GAGATTT;
2	fimo	nucleotide_motif	18228073	18228079	36.5	+	.	Name=DARACWW_2:18228067-18228080(+)+;Alias=MEME-1;ID=DARACWW-MEME-1-1-2:18228067-18228080(+);pvalue=0.000224;qvalue=0.0467;sequence=AAGACTT;
2	fimo	nucleotide_motif	18228110	18228116	30.5	+	.	Name=DARACWW_2:18228104-18228117(+)+;Alias=MEME-1;ID=DARACWW-MEME-1-1-2:18228104-18228117(+);pvalue=0.000882;qvalue=0.0619;sequence=CAGACTT;
2	fimo	nucleotide_motif	18228139	18228145	30.2	+	.	Name=DARACWW_2:18228135-18228148(+)+;Alias=MEME-1;ID=DARACWW-MEME-1-1-2:18228135-18228148(+);pvalue=0.000945;qvalue=0.0635;sequence=TGGACTT;
2	fimo	nucleotide_motif	18230480	18230486	26.7	+	.	Name=DARACWW_2:18230474-18230487(+)+;Alias=MEME-1;ID=DARACWW-MEME-1-1-2:18230474-18230487(+);pvalue=0.00212;qvalue=0.0766;sequence=GAAACTA;
2	fimo	nucleotide_motif	18249144	18249150	38.4	-	.	Name=DARACWW_2:18249140-18249153(-)+;Alias=MEME-1;ID=DARACWW-MEME-1-1-2:18249140-18249153(-);pvalue=0.000143;qvalue=0.0467;sequence=GAGACTT;
2	fimo	nucleotide_motif	18249187	18249193	21.9	-	.	Name=DARACWW_2:18249182-18249195(-)+;Alias=MEME-1;ID=DARACWW-MEME-1-1-2:18249182-18249195(-);pvalue=0.00652;qvalue=0.0978;sequence=AAGATTT;
2	fimo	nucleotide_motif	18282643	18282649	27.7	+	.	Name=DARACWW_2:18282634-18282649(+)+;Alias=MEME-1;ID=DARACWW-MEME-1-1-2:18282634-18282649(+);pvalue=0.0017;qvalue=0.0732;sequence=AAAACAT;
2	fimo	nucleotide_motif	18305373	18305379	25.5	-	.	Name=DARACWW_2:18305369-18305382(-)+;Alias=MEME-1;ID=DARACWW-MEME-1-1-2:18305369-18305382(-);pvalue=0.00281;qvalue=0.0801;sequence=TGGACAT;
2	fimo	nucleotide_motif	18320694	18320700	26.1	+	.	Name=DARACWW_2:18320692-18320705(+)+;Alias=MEME-1;ID=DARACWW-MEME-1-1-2:18320692-18320705(+);pvalue=0.00244;qvalue=0.0778;sequence=GAAACTC;
2	fimo	nucleotide_motif	18320742	18320748	23.6	+	.	Name=DARACWW_2:18320736-18320749(+)+;Alias=MEME-1;ID=DARACWW-MEME-1-1-2:18320736-18320749(+);pvalue=0.00439;qvalue=0.0905;sequence=CAAACAT;
2	fimo	nucleotide_motif	18367579	18367585	21.9	+	.	Name=DARACWW_2:18367572-18367585(+)+;Alias=MEME-1;ID=DARACWW-MEME-1-1-2:18367572-18367585(+);pvalue=0.00642;qvalue=0.0978;sequence=AGAACTA;
2	fimo	nucleotide_motif	18383370	18383376	24.3	+	.	Name=DARACWW_2:18383366-18383379(+)+;Alias=MEME-1;ID=DARACWW-MEME-1-1-2:18383366-18383379(+);pvalue=0.00367;qvalue=0.0857;sequence=GAGACCT;
2	fimo	nucleotide_motif	18383496	18383502	29.7	+	.	Name=DARACWW_2:18383492-18383505(+)+;Alias=MEME-1;ID=DARACWW-MEME-1-1-2:18383492-18383505(+);pvalue=0.00108;qvalue=0.0664;sequence=GAGACTA;
2	fimo	nucleotide_motif	18386065	18386071	41.1	+	.	Name=DARACWW_2:18386059-18386072(+)+;Alias=MEME-1;ID=DARACWW-MEME-1-1-2:18386059-18386072(+);pvalue=7.71e-05;qvalue=0.0467;sequence=TAGACTT;
2	fimo	nucleotide_motif	18504610	18504616	38.4	+	.	Name=DARACWW_2:18504606-18504619(+)+;Alias=MEME-1;ID=DARACWW-MEME-1-1-2:18504606-18504619(+);pvalue=0.000143;qvalue=0.0467;sequence=GAGACTT;
2	fimo	nucleotide_motif	18504621	18504627	26.1	+	.	Name=DARACWW_2:18504615-18504628(+)+;Alias=MEME-1;ID=DARACWW-MEME-1-1-2:18504615-18504628(+);pvalue=0.00244;qvalue=0.0778;sequence=GAAACTC;
2	fimo	nucleotide_motif	18549017	18549023	26	-	.	Name=DARACWW_2:18549011-18549024(-)+;Alias=MEME-1;ID=DARACWW-MEME-1-1-2:18549011-18549024(-);pvalue=0.00252;qvalue=0.0778;sequence=AAAACTC;
2	fimo	nucleotide_motif	18587183	18587189	24.9	-	.	Name=DARACWW_2:18587179-18587194(-)+;Alias=MEME-1;ID=DARACWW-MEME-1-1-2:18587179-18587194(-);pvalue=0.00323;qvalue=0.0822;sequence=AAGACAA;
2	fimo	nucleotide_motif	18613147	18613153	36.5	+	.	Name=DARACWW_2:18613140-18613154(+)+;Alias=MEME-1;ID=DARACWW-MEME-1-1-2:18613140-18613154(+);pvalue=0.000224;qvalue=0.0467;sequence=AAGACTT;
2	fimo	nucleotide_motif	18617999	18618005	25.2	-	.	Name=DARACWW_2:18617995-18618008(-)+;Alias=MEME-1;ID=DARACWW-MEME-1-1-2:18617995-18618008(-);pvalue=0.003;qvalue=0.0822;sequence=GAGACTG;
2	fimo	nucleotide_motif	18625663	18625669	30.9	+	.	Name=DARACWW_2:18625657-18625670(+)+;Alias=MEME-1;ID=DARACWW-MEME-1-1-2:18625657-18625670(+);pvalue=0.000818;qvalue=0.0606;sequence=TAGACTA;
2	fimo	nucleotide_motif	18662922	18662928	26.7	+	.	Name=DARACWW_2:18662916-18662929(+)+;Alias=MEME-1;ID=DARACWW-MEME-1-1-2:18662916-18662929(+);pvalue=0.00212;qvalue=0.0766;sequence=TAAACTC;
2	fimo	nucleotide_motif	18662988	18662994	28.7	+	.	Name=DARACWW_2:18662982-18662995(+)+;Alias=MEME-1;ID=DARACWW-MEME-1-1-2:18662982-18662995(+);pvalue=0.00134;qvalue=0.073;sequence=GAGACTC;
2	fimo	nucleotide_motif	18679866	18679872	23.7	+	.	Name=DARACWW_2:18679860-18679873(+)+;Alias=MEME-1;ID=DARACWW-MEME-1-1-2:18679860-18679873(+);pvalue=0.00431;qvalue=0.0905;sequence=TAAACAA;
2	fimo	nucleotide_motif	18679873	18679879	26.7	+	.	Name=DARACWW_2:18679867-18679880(+)+;Alias=MEME-1;ID=DARACWW-MEME-1-1-2:18679867-18679880(+);pvalue=0.00212;qvalue=0.0766;sequence=TAAACTC;
2	fimo	nucleotide_motif	18694652	18694658	23	+	.	Name=DARACWW_2:18694645-18694658(+)+;Alias=MEME-1;ID=DARACWW-MEME-1-1-2:18694645-18694658(+);pvalue=0.00506;qvalue=0.0905;sequence=AAAACAA;
2	fimo	nucleotide_motif	18732966	18732972	26	+	.	Name=DARACWW_2:18732964-18732977(+)+;Alias=MEME-1;ID=DARACWW-MEME-1-1-2:18732964-18732977(+);pvalue=0.00252;qvalue=0.0778;sequence=AAAACTC;
2	fimo	nucleotide_motif	18757752	18757758	25.5	-	.	Name=DARACWW_2:18757748-18757761(-)+;Alias=MEME-1;ID=DARACWW-MEME-1-1-2:18757748-18757761(-);pvalue=0.00281;qvalue=0.0801;sequence=TGGACAT;
2	fimo	nucleotide_motif	18795757	18795763	27.7	+	.	Name=DARACWW_2:18795750-18795766(+)+;Alias=MEME-1;ID=DARACWW-MEME-1-1-2:18795750-18795766(+);pvalue=0.0017;qvalue=0.0732;sequence=AAAACAT;
2	fimo	nucleotide_motif	18799784	18799790	32.3	-	.	Name=DARACWW_2:18799780-18799793(-)+;Alias=MEME-1;ID=DARACWW-MEME-1-1-2:18799780-18799793(-);pvalue=0.000582;qvalue=0.0548;sequence=TAGACAT;
2	fimo	nucleotide_motif	18799795	18799801	35	-	.	Name=DARACWW_2:18799790-18799805(-)+;Alias=MEME-1;ID=DARACWW-MEME-1-1-2:18799790-18799805(-);pvalue=0.000319;qvalue=0.0508;sequence=TAAACTT;
2	fimo	nucleotide_motif	18807710	18807716	26	-	.	Name=DARACWW_2:18807705-18807718(-)+;Alias=MEME-1;ID=DARACWW-MEME-1-1-2:18807705-18807718(-);pvalue=0.00252;qvalue=0.0778;sequence=AAAACTC;
2	fimo	nucleotide_motif	18814879	18814885	24.3	-	.	Name=DARACWW_2:18814875-18814888(-)+;Alias=MEME-1;ID=DARACWW-MEME-1-1-2:18814875-18814888(-);pvalue=0.00367;qvalue=0.0857;sequence=TGGACTA;
2	fimo	nucleotide_motif	18841190	18841196	27.7	+	.	Name=DARACWW_2:18841183-18841196(+)+;Alias=MEME-1;ID=DARACWW-MEME-1-1-2:18841183-18841196(+);pvalue=0.0017;qvalue=0.0732;sequence=AAAACAT;
2	fimo	nucleotide_motif	18862644	18862650	36.5	+	.	Name=DARACWW_2:18862640-18862653(+)+;Alias=MEME-1;ID=DARACWW-MEME-1-1-2:18862640-18862653(+);pvalue=0.000224;qvalue=0.0467;sequence=AAGACTT;
2	fimo	nucleotide_motif	18862754	18862760	36.5	+	.	Name=DARACWW_2:18862750-18862763(+)+;Alias=MEME-1;ID=DARACWW-MEME-1-1-2:18862750-18862763(+);pvalue=0.000224;qvalue=0.0467;sequence=AAGACTT;
2	fimo	nucleotide_motif	18862796	18862802	31.3	+	.	Name=DARACWW_2:18862790-18862803(+)+;Alias=MEME-1;ID=DARACWW-MEME-1-1-2:18862790-18862803(+);pvalue=0.000737;qvalue=0.0566;sequence=AAGACAT;
2	fimo	nucleotide_motif	18911815	18911821	38.4	+	.	Name=DARACWW_2:18911811-18911824(+)+;Alias=MEME-1;ID=DARACWW-MEME-1-1-2:18911811-18911824(+);pvalue=0.000143;qvalue=0.0467;sequence=GAGACTT;
2	fimo	nucleotide_motif	18911826	18911832	23	+	.	Name=DARACWW_2:18911825-18911839(+)+;Alias=MEME-1;ID=DARACWW-MEME-1-2-2:18911825-18911839(+);pvalue=0.00506;qvalue=0.0905;sequence=AAAACAA;
2	fimo	nucleotide_motif	18911832	18911838	31.3	+	.	Name=DARACWW_2:18911825-18911839(+)+;Alias=MEME-1;ID=DARACWW-MEME-1-1-2:18911825-18911839(+);pvalue=0.000737;qvalue=0.0566;sequence=AAGACAT;
2	fimo	nucleotide_motif	18917460	18917466	23.3	-	.	Name=DARACWW_2:18917456-18917469(-)+;Alias=MEME-1;ID=DARACWW-MEME-1-1-2:18917456-18917469(-);pvalue=0.00471;qvalue=0.0905;sequence=GAAACTG;
2	fimo	nucleotide_motif	18921108	18921114	26.7	+	.	Name=DARACWW_2:18921102-18921115(+)+;Alias=MEME-1;ID=DARACWW-MEME-1-1-2:18921102-18921115(+);pvalue=0.00212;qvalue=0.0766;sequence=GAAACTA;
2	fimo	nucleotide_motif	18921120	18921126	23.6	+	.	Name=DARACWW_2:18921114-18921127(+)+;Alias=MEME-1;ID=DARACWW-MEME-1-1-2:18921114-18921127(+);pvalue=0.00439;qvalue=0.0905;sequence=CAAACAT;
2	fimo	nucleotide_motif	18932113	18932119	24	-	.	Name=DARACWW_2:18932109-18932122(-)+;Alias=MEME-1;ID=DARACWW-MEME-1-1-2:18932109-18932122(-);pvalue=0.00402;qvalue=0.0901;sequence=AGGACTA;
2	fimo	nucleotide_motif	18954536	18954542	26.7	+	.	Name=DARACWW_2:18954530-18954543(+)+;Alias=MEME-1;ID=DARACWW-MEME-1-1-2:18954530-18954543(+);pvalue=0.00212;qvalue=0.0766;sequence=GAAACTA;
2	fimo	nucleotide_motif	19003177	19003183	24.9	+	.	Name=DARACWW_2:19003171-19003184(+)+;Alias=MEME-1;ID=DARACWW-MEME-1-1-2:19003171-19003184(+);pvalue=0.00323;qvalue=0.0822;sequence=TAGACCT;
2	fimo	nucleotide_motif	19022331	19022337	35	-	.	Name=DARACWW_2:19022324-19022338(-)+;Alias=MEME-1;ID=DARACWW-MEME-1-1-2:19022324-19022338(-);pvalue=0.000319;qvalue=0.0508;sequence=TAAACTT;
2	fimo	nucleotide_motif	19022403	19022409	23	-	.	Name=DARACWW_2:19022399-19022412(-)+;Alias=MEME-1;ID=DARACWW-MEME-1-1-2:19022399-19022412(-);pvalue=0.00506;qvalue=0.0905;sequence=AAAACTG;
2	fimo	nucleotide_motif	19036477	19036483	35	+	.	Name=DARACWW_2:19036471-19036484(+)+;Alias=MEME-1;ID=DARACWW-MEME-1-1-2:19036471-19036484(+);pvalue=0.000319;qvalue=0.0508;sequence=TAAACTT;
2	fimo	nucleotide_motif	19074979	19074985	26.5	+	.	Name=DARACWW_2:19074973-19074986(+)+;Alias=MEME-1;ID=DARACWW-MEME-1-1-2:19074973-19074986(+);pvalue=0.00222;qvalue=0.0769;sequence=AAAACTA;
2	fimo	nucleotide_motif	19086595	19086601	25.6	-	.	Name=DARACWW_2:19086593-19086606(-)+;Alias=MEME-1;ID=DARACWW-MEME-1-1-2:19086593-19086606(-);pvalue=0.00274;qvalue=0.0794;sequence=CAGACAT;
2	fimo	nucleotide_motif	19086628	19086634	25.5	-	.	Name=DARACWW_2:19086624-19086637(-)+;Alias=MEME-1;ID=DARACWW-MEME-1-1-2:19086624-19086637(-);pvalue=0.00281;qvalue=0.0801;sequence=TGGACAT;
2	fimo	nucleotide_motif	19086714	19086720	26	-	.	Name=DARACWW_2:19086710-19086723(-)+;Alias=MEME-1;ID=DARACWW-MEME-1-1-2:19086710-19086723(-);pvalue=0.00252;qvalue=0.0778;sequence=AAAACTC;
2	fimo	nucleotide_motif	19108162	19108168	29.3	+	.	Name=DARACWW_2:19108155-19108169(+)+;Alias=MEME-1;ID=DARACWW-MEME-1-1-2:19108155-19108169(+);pvalue=0.00116;qvalue=0.0681;sequence=AAGACTA;
2	fimo	nucleotide_motif	19110571	19110577	34	-	.	Name=DARACWW_2:19110567-19110580(-)+;Alias=MEME-1;ID=DARACWW-MEME-1-1-2:19110567-19110580(-);pvalue=0.0004;qvalue=0.0508;sequence=GAAACTT;
2	fimo	nucleotide_motif	19110591	19110597	24.1	-	.	Name=DARACWW_2:19110589-19110602(-)+;Alias=MEME-1;ID=DARACWW-MEME-1-1-2:19110589-19110602(-);pvalue=0.00384;qvalue=0.0872;sequence=CAGACTC;
2	fimo	nucleotide_motif	19245082	19245088	29.3	+	.	Name=DARACWW_2:19245074-19245091(+)+;Alias=MEME-1;ID=DARACWW-MEME-1-1-2:19245074-19245091(+);pvalue=0.00116;qvalue=0.0681;sequence=AAGACTA;
2	fimo	nucleotide_motif	19340660	19340666	31.9	+	.	Name=DARACWW_2:19340656-19340669(+)+;Alias=MEME-1;ID=DARACWW-MEME-1-1-2:19340656-19340669(+);pvalue=0.000651;qvalue=0.0555;sequence=GAGACAT;
2	fimo	nucleotide_motif	19345263	19345269	27.1	+	.	Name=DARACWW_2:19345258-19345271(+)+;Alias=MEME-1;ID=DARACWW-MEME-1-1-2:19345258-19345271(+);pvalue=0.00195;qvalue=0.0766;sequence=TGAACTT;
2	fimo	nucleotide_motif	19368567	19368573	21.8	+	.	Name=DARACWW_2:19368561-19368574(+)+;Alias=MEME-1;ID=DARACWW-MEME-1-1-2:19368561-19368574(+);pvalue=0.00665;qvalue=0.0986;sequence=AAGACAG;
2	fimo	nucleotide_motif	19368596	19368602	21.9	+	.	Name=DARACWW_2:19368592-19368606(+)+;Alias=MEME-1;ID=DARACWW-MEME-1-1-2:19368592-19368606(+);pvalue=0.00652;qvalue=0.0978;sequence=AAGATTT;
2	fimo	nucleotide_motif	19441975	19441981	23.7	+	.	Name=DARACWW_2:19441968-19441982(+)+;Alias=MEME-1;ID=DARACWW-MEME-1-1-2:19441968-19441982(+);pvalue=0.00431;qvalue=0.0905;sequence=TAAACAA;
2	fimo	nucleotide_motif	19442026	19442032	25.6	+	.	Name=DARACWW_2:19442020-19442033(+)+;Alias=MEME-1;ID=DARACWW-MEME-1-1-2:19442020-19442033(+);pvalue=0.00274;qvalue=0.0794;sequence=CAGACAT;
2	fimo	nucleotide_motif	19442114	19442120	22.7	-	.	Name=DARACWW_2:19442110-19442123(-)+;Alias=MEME-1;ID=DARACWW-MEME-1-1-2:19442110-19442123(-);pvalue=0.00537;qvalue=0.0935;sequence=GAAACAC;
2	fimo	nucleotide_motif	19518684	19518690	25.7	+	.	Name=DARACWW_2:19518678-19518691(+)+;Alias=MEME-1;ID=DARACWW-MEME-1-1-2:19518678-19518691(+);pvalue=0.00267;qvalue=0.0794;sequence=TAGACAA;
2	fimo	nucleotide_motif	19523847	19523853	34	+	.	Name=DARACWW_2:19523841-19523854(+)+;Alias=MEME-1;ID=DARACWW-MEME-1-1-2:19523841-19523854(+);pvalue=0.0004;qvalue=0.0508;sequence=GAAACTT;
2	fimo	nucleotide_motif	19523983	19523989	36.5	+	.	Name=DARACWW_2:19523977-19523990(+)+;Alias=MEME-1;ID=DARACWW-MEME-1-1-2:19523977-19523990(+);pvalue=0.000224;qvalue=0.0467;sequence=AAGACTT;
2	fimo	nucleotide_motif	19531441	19531447	33	+	.	Name=DARACWW_2:19531434-19531451(+)+;Alias=MEME-1;ID=DARACWW-MEME-1-1-2:19531434-19531451(+);pvalue=0.0005;qvalue=0.0508;sequence=AAAACTT;
2	fimo	nucleotide_motif	19538448	19538454	31.9	+	.	Name=DARACWW_2:19538444-19538457(+)+;Alias=MEME-1;ID=DARACWW-MEME-1-1-2:19538444-19538457(+);pvalue=0.000651;qvalue=0.0555;sequence=GAGACAT;
2	fimo	nucleotide_motif	19538571	19538577	31.3	+	.	Name=DARACWW_2:19538569-19538582(+)+;Alias=MEME-1;ID=DARACWW-MEME-1-1-2:19538569-19538582(+);pvalue=0.000737;qvalue=0.0566;sequence=AAGACAT;
2	fimo	nucleotide_motif	19552422	19552428	29.1	-	.	Name=DARACWW_2:19552418-19552431(-)+;Alias=MEME-1;ID=DARACWW-MEME-1-1-2:19552418-19552431(-);pvalue=0.00122;qvalue=0.0702;sequence=GGGACTT;
2	fimo	nucleotide_motif	19552429	19552435	23	-	.	Name=DARACWW_2:19552425-19552438(-)+;Alias=MEME-1;ID=DARACWW-MEME-1-1-2:19552425-19552438(-);pvalue=0.00506;qvalue=0.0905;sequence=AAAACTG;
2	fimo	nucleotide_motif	19554873	19554879	25.7	-	.	Name=DARACWW_2:19554869-19554882(-)+;Alias=MEME-1;ID=DARACWW-MEME-1-1-2:19554869-19554882(-);pvalue=0.00267;qvalue=0.0794;sequence=TAGACAA;
2	fimo	nucleotide_motif	19554936	19554942	24.9	-	.	Name=DARACWW_2:19554932-19554945(-)+;Alias=MEME-1;ID=DARACWW-MEME-1-1-2:19554932-19554945(-);pvalue=0.00323;qvalue=0.0822;sequence=AAGACAA;
2	fimo	nucleotide_motif	19554949	19554955	23.3	-	.	Name=DARACWW_2:19554945-19554958(-)+;Alias=MEME-1;ID=DARACWW-MEME-1-1-2:19554945-19554958(-);pvalue=0.00471;qvalue=0.0905;sequence=GAAACAA;
2	fimo	nucleotide_motif	19610985	19610991	24.7	-	.	Name=DARACWW_2:19610983-19610996(-)+;Alias=MEME-1;ID=DARACWW-MEME-1-1-2:19610983-19610996(-);pvalue=0.00342;qvalue=0.0846;sequence=CAGACTA;
2	fimo	nucleotide_motif	19611046	19611052	21.8	-	.	Name=DARACWW_2:19611042-19611055(-)+;Alias=MEME-1;ID=DARACWW-MEME-1-1-2:19611042-19611055(-);pvalue=0.00665;qvalue=0.0986;sequence=AAGACAG;
2	fimo	nucleotide_motif	19611132	19611138	24.9	-	.	Name=DARACWW_2:19611128-19611141(-)+;Alias=MEME-1;ID=DARACWW-MEME-1-1-2:19611128-19611141(-);pvalue=0.00323;qvalue=0.0822;sequence=AAGACTG;
2	fimo	nucleotide_motif	19647047	19647053	24.8	+	.	Name=DARACWW_2:19647042-19647056(+)+;Alias=MEME-1;ID=DARACWW-MEME-1-1-2:19647042-19647056(+);pvalue=0.00328;qvalue=0.0832;sequence=GGGACAT;
2	fimo	nucleotide_motif	19647147	19647153	30.2	+	.	Name=DARACWW_2:19647143-19647156(+)+;Alias=MEME-1;ID=DARACWW-MEME-1-1-2:19647143-19647156(+);pvalue=0.000945;qvalue=0.0635;sequence=TGGACTT;
2	fimo	nucleotide_motif	19663915	19663921	22.5	+	.	Name=DARACWW_2:19663910-19663923(+)+;Alias=MEME-1;ID=DARACWW-MEME-1-1-2:19663910-19663923(+);pvalue=0.00567;qvalue=0.0952;sequence=TGAACTA;
3	fimo	nucleotide_motif	16686	16692	25.6	-	.	Name=DARACWW_3:16682-16695(-)+;Alias=MEME-1;ID=DARACWW-MEME-1-1-3:16682-16695(-);pvalue=0.00274;qvalue=0.0794;sequence=CAGACAT;
3	fimo	nucleotide_motif	16740	16746	23.3	-	.	Name=DARACWW_3:16736-16749(-)+;Alias=MEME-1;ID=DARACWW-MEME-1-1-3:16736-16749(-);pvalue=0.00471;qvalue=0.0905;sequence=GAAACAA;
3	fimo	nucleotide_motif	31264	31270	24.9	-	.	Name=DARACWW_3:31262-31276(-)+;Alias=MEME-1;ID=DARACWW-MEME-1-1-3:31262-31276(-);pvalue=0.00323;qvalue=0.0822;sequence=AAGACTG;
3	fimo	nucleotide_motif	39138	39144	22.5	-	.	Name=DARACWW_3:39133-39147(-)+;Alias=MEME-1;ID=DARACWW-MEME-1-1-3:39133-39147(-);pvalue=0.00567;qvalue=0.0952;sequence=TGAACTA;
3	fimo	nucleotide_motif	44535	44541	23	-	.	Name=DARACWW_3:44531-44545(-)+;Alias=MEME-1;ID=DARACWW-MEME-1-1-3:44531-44545(-);pvalue=0.00506;qvalue=0.0905;sequence=TAAACCT;
3	fimo	nucleotide_motif	87648	87654	27.4	+	.	Name=DARACWW_3:87642-87656(+)+;Alias=MEME-1;ID=DARACWW-MEME-1-1-3:87642-87656(+);pvalue=0.0018;qvalue=0.0746;sequence=TAAACTA;
3	fimo	nucleotide_motif	143456	143462	36.5	+	.	Name=DARACWW_3:143449-143463(+)+;Alias=MEME-1;ID=DARACWW-MEME-1-1-3:143449-143463(+);pvalue=0.000224;qvalue=0.0467;sequence=AAGACTT;
3	fimo	nucleotide_motif	212908	212914	26.5	-	.	Name=DARACWW_3:212901-212915(-)+;Alias=MEME-1;ID=DARACWW-MEME-1-1-3:212901-212915(-);pvalue=0.00222;qvalue=0.0769;sequence=AAAACTA;
3	fimo	nucleotide_motif	212941	212947	24.9	-	.	Name=DARACWW_3:212937-212950(-)+;Alias=MEME-1;ID=DARACWW-MEME-1-1-3:212937-212950(-);pvalue=0.00323;qvalue=0.0822;sequence=AAGACTG;
3	fimo	nucleotide_motif	212955	212961	23	-	.	Name=DARACWW_3:212948-212962(-)+;Alias=MEME-1;ID=DARACWW-MEME-1-1-3:212948-212962(-);pvalue=0.00506;qvalue=0.0905;sequence=AAAACAA;
3	fimo	nucleotide_motif	212970	212976	23.3	-	.	Name=DARACWW_3:212966-212979(-)+;Alias=MEME-1;ID=DARACWW-MEME-1-1-3:212966-212979(-);pvalue=0.00471;qvalue=0.0905;sequence=GAAACAA;
3	fimo	nucleotide_motif	255401	255407	24.8	+	.	Name=DARACWW_3:255397-255410(+)+;Alias=MEME-1;ID=DARACWW-MEME-1-1-3:255397-255410(+);pvalue=0.00328;qvalue=0.0832;sequence=GGGACAT;
3	fimo	nucleotide_motif	275467	275473	23.7	-	.	Name=DARACWW_3:275463-275476(-)+;Alias=MEME-1;ID=DARACWW-MEME-1-1-3:275463-275476(-);pvalue=0.00431;qvalue=0.0905;sequence=TAAACAA;
3	fimo	nucleotide_motif	283510	283516	23.3	+	.	Name=DARACWW_3:283508-283521(+)+;Alias=MEME-1;ID=DARACWW-MEME-1-1-3:283508-283521(+);pvalue=0.00471;qvalue=0.0905;sequence=GAAACAA;
3	fimo	nucleotide_motif	314867	314873	21.9	-	.	Name=DARACWW_3:314863-314876(-)+;Alias=MEME-1;ID=DARACWW-MEME-1-1-3:314863-314876(-);pvalue=0.00642;qvalue=0.0978;sequence=AGAACTA;
3	fimo	nucleotide_motif	363977	363983	34	-	.	Name=DARACWW_3:363971-363984(-)+;Alias=MEME-1;ID=DARACWW-MEME-1-1-3:363971-363984(-);pvalue=0.0004;qvalue=0.0508;sequence=GAAACTT;
3	fimo	nucleotide_motif	363985	363991	25.5	-	.	Name=DARACWW_3:363981-363994(-)+;Alias=MEME-1;ID=DARACWW-MEME-1-1-3:363981-363994(-);pvalue=0.00281;qvalue=0.0801;sequence=TGGACAT;
3	fimo	nucleotide_motif	368796	368802	33	+	.	Name=DARACWW_3:368789-368802(+)+;Alias=MEME-1;ID=DARACWW-MEME-1-1-3:368789-368802(+);pvalue=0.0005;qvalue=0.0508;sequence=AAAACTT;
3	fimo	nucleotide_motif	396233	396239	38.4	-	.	Name=DARACWW_3:396229-396242(-)+;Alias=MEME-1;ID=DARACWW-MEME-1-1-3:396229-396242(-);pvalue=0.000143;qvalue=0.0467;sequence=GAGACTT;
3	fimo	nucleotide_motif	409067	409073	38.4	+	.	Name=DARACWW_3:409061-409074(+)+;Alias=MEME-1;ID=DARACWW-MEME-1-1-3:409061-409074(+);pvalue=0.000143;qvalue=0.0467;sequence=GAGACTT;
3	fimo	nucleotide_motif	412097	412103	29.3	-	.	Name=DARACWW_3:412095-412108(-)+;Alias=MEME-1;ID=DARACWW-MEME-1-1-3:412095-412108(-);pvalue=0.00116;qvalue=0.0681;sequence=AAGACTA;
3	fimo	nucleotide_motif	412152	412158	24.9	-	.	Name=DARACWW_3:412150-412164(-)+;Alias=MEME-1;ID=DARACWW-MEME-1-1-3:412150-412164(-);pvalue=0.00323;qvalue=0.0822;sequence=AAGACTG;
3	fimo	nucleotide_motif	417474	417480	25.2	+	.	Name=DARACWW_3:417468-417481(+)+;Alias=MEME-1;ID=DARACWW-MEME-1-1-3:417468-417481(+);pvalue=0.003;qvalue=0.0822;sequence=GAGACAA;
3	fimo	nucleotide_motif	431036	431042	24.6	-	.	Name=DARACWW_3:431031-431045(-)+;Alias=MEME-1;ID=DARACWW-MEME-1-1-3:431031-431045(-);pvalue=0.00348;qvalue=0.0846;sequence=GAGACAC;
3	fimo	nucleotide_motif	431044	431050	28.2	-	.	Name=DARACWW_3:431040-431053(-)+;Alias=MEME-1;ID=DARACWW-MEME-1-1-3:431040-431053(-);pvalue=0.00151;qvalue=0.0732;sequence=TAAACAT;
3	fimo	nucleotide_motif	481372	481378	26.7	+	.	Name=DARACWW_3:481366-481379(+)+;Alias=MEME-1;ID=DARACWW-MEME-1-1-3:481366-481379(+);pvalue=0.00212;qvalue=0.0766;sequence=TAAACTC;
3	fimo	nucleotide_motif	511383	511389	33	+	.	Name=DARACWW_3:511376-511391(+)+;Alias=MEME-1;ID=DARACWW-MEME-1-1-3:511376-511391(+);pvalue=0.0005;qvalue=0.0508;sequence=AAAACTT;
3	fimo	nucleotide_motif	511494	511500	36.5	+	.	Name=DARACWW_3:511487-511501(+)+;Alias=MEME-1;ID=DARACWW-MEME-1-1-3:511487-511501(+);pvalue=0.000224;qvalue=0.0467;sequence=AAGACTT;
3	fimo	nucleotide_motif	526742	526748	27.7	-	.	Name=DARACWW_3:526738-526752(-)+;Alias=MEME-1;ID=DARACWW-MEME-1-1-3:526738-526752(-);pvalue=0.0017;qvalue=0.0732;sequence=AAAACAT;
3	fimo	nucleotide_motif	543245	543251	21.9	+	.	Name=DARACWW_3:543242-543255(+)+;Alias=MEME-1;ID=DARACWW-MEME-1-1-3:543242-543255(+);pvalue=0.00652;qvalue=0.0978;sequence=AAGATTT;
3	fimo	nucleotide_motif	564765	564771	36.5	+	.	Name=DARACWW_3:564758-564772(+)+;Alias=MEME-1;ID=DARACWW-MEME-1-1-3:564758-564772(+);pvalue=0.000224;qvalue=0.0467;sequence=AAGACTT;
3	fimo	nucleotide_motif	581498	581504	35	+	.	Name=DARACWW_3:581492-581506(+)+;Alias=MEME-1;ID=DARACWW-MEME-1-1-3:581492-581506(+);pvalue=0.000319;qvalue=0.0508;sequence=TAAACTT;
3	fimo	nucleotide_motif	588102	588108	28.2	+	.	Name=DARACWW_3:588096-588109(+)+;Alias=MEME-1;ID=DARACWW-MEME-1-1-3:588096-588109(+);pvalue=0.00151;qvalue=0.0732;sequence=TAAACAT;
3	fimo	nucleotide_motif	588267	588273	36.5	+	.	Name=DARACWW_3:588261-588274(+)+;Alias=MEME-1;ID=DARACWW-MEME-1-1-3:588261-588274(+);pvalue=0.000224;qvalue=0.0467;sequence=AAGACTT;
3	fimo	nucleotide_motif	593338	593344	27.7	-	.	Name=DARACWW_3:593335-593348(-)+;Alias=MEME-1;ID=DARACWW-MEME-1-1-3:593335-593348(-);pvalue=0.0017;qvalue=0.0732;sequence=AAAACAT;
3	fimo	nucleotide_motif	597427	597433	21.9	-	.	Name=DARACWW_3:597422-597435(-)+;Alias=MEME-1;ID=DARACWW-MEME-1-1-3:597422-597435(-);pvalue=0.00642;qvalue=0.0978;sequence=GAGATTT;
3	fimo	nucleotide_motif	597441	597447	25.2	-	.	Name=DARACWW_3:597437-597450(-)+;Alias=MEME-1;ID=DARACWW-MEME-1-1-3:597437-597450(-);pvalue=0.003;qvalue=0.0822;sequence=GAGACAA;
3	fimo	nucleotide_motif	602489	602495	24.6	-	.	Name=DARACWW_3:602485-602498(-)+;Alias=MEME-1;ID=DARACWW-MEME-1-1-3:602485-602498(-);pvalue=0.00348;qvalue=0.0846;sequence=GAGACAC;
3	fimo	nucleotide_motif	602574	602580	23.5	-	.	Name=DARACWW_3:602570-602583(-)+;Alias=MEME-1;ID=DARACWW-MEME-1-1-3:602570-602583(-);pvalue=0.00447;qvalue=0.0905;sequence=TGAACAT;
3	fimo	nucleotide_motif	602581	602587	22.1	-	.	Name=DARACWW_3:602575-602588(-)+;Alias=MEME-1;ID=DARACWW-MEME-1-1-3:602575-602588(-);pvalue=0.00612;qvalue=0.0968;sequence=CAAACTC;
3	fimo	nucleotide_motif	602600	602606	32.3	-	.	Name=DARACWW_3:602598-602611(-)+;Alias=MEME-1;ID=DARACWW-MEME-1-1-3:602598-602611(-);pvalue=0.000582;qvalue=0.0548;sequence=TAGACAT;
3	fimo	nucleotide_motif	627690	627696	22.1	-	.	Name=DARACWW_3:627688-627701(-)+;Alias=MEME-1;ID=DARACWW-MEME-1-1-3:627688-627701(-);pvalue=0.00612;qvalue=0.0968;sequence=CAAACTC;
3	fimo	nucleotide_motif	637138	637144	24.3	+	.	Name=DARACWW_3:637132-637145(+)+;Alias=MEME-1;ID=DARACWW-MEME-1-1-3:637132-637145(+);pvalue=0.00367;qvalue=0.0857;sequence=GAGACCT;
3	fimo	nucleotide_motif	677957	677963	31.3	+	.	Name=DARACWW_3:677949-677964(+)+;Alias=MEME-1;ID=DARACWW-MEME-1-1-3:677949-677964(+);pvalue=0.000737;qvalue=0.0566;sequence=AAGACAT;
3	fimo	nucleotide_motif	681859	681865	27.4	+	.	Name=DARACWW_3:681853-681866(+)+;Alias=MEME-1;ID=DARACWW-MEME-1-1-3:681853-681866(+);pvalue=0.0018;qvalue=0.0746;sequence=TAAACTA;
3	fimo	nucleotide_motif	691794	691800	24.7	+	.	Name=DARACWW_3:691790-691803(+)+;Alias=MEME-1;ID=DARACWW-MEME-1-1-3:691790-691803(+);pvalue=0.00342;qvalue=0.0846;sequence=AGGACAT;
3	fimo	nucleotide_motif	705528	705534	38.4	-	.	Name=DARACWW_3:705524-705537(-)+;Alias=MEME-1;ID=DARACWW-MEME-1-1-3:705524-705537(-);pvalue=0.000143;qvalue=0.0467;sequence=GAGACTT;
3	fimo	nucleotide_motif	727673	727679	23.7	-	.	Name=DARACWW_3:727669-727682(-)+;Alias=MEME-1;ID=DARACWW-MEME-1-1-3:727669-727682(-);pvalue=0.00431;qvalue=0.0905;sequence=TAAACAA;
3	fimo	nucleotide_motif	778747	778753	27.4	-	.	Name=DARACWW_3:778743-778756(-)+;Alias=MEME-1;ID=DARACWW-MEME-1-1-3:778743-778756(-);pvalue=0.0018;qvalue=0.0746;sequence=TAAACTA;
3	fimo	nucleotide_motif	925175	925181	25.6	+	.	Name=DARACWW_3:925171-925184(+)+;Alias=MEME-1;ID=DARACWW-MEME-1-1-3:925171-925184(+);pvalue=0.00274;qvalue=0.0794;sequence=CAGACAT;
3	fimo	nucleotide_motif	994404	994410	22.2	+	.	Name=DARACWW_3:994397-994410(+)+;Alias=MEME-1;ID=DARACWW-MEME-1-1-3:994397-994410(+);pvalue=0.00599;qvalue=0.0965;sequence=ATGACTT;
3	fimo	nucleotide_motif	999486	999492	21.9	-	.	Name=DARACWW_3:999481-999494(-)+;Alias=MEME-1;ID=DARACWW-MEME-1-1-3:999481-999494(-);pvalue=0.00652;qvalue=0.0978;sequence=AAGATTT;
3	fimo	nucleotide_motif	999522	999528	21.9	-	.	Name=DARACWW_3:999521-999534(-)+;Alias=MEME-1;ID=DARACWW-MEME-1-2-3:999521-999534(-);pvalue=0.00642;qvalue=0.0978;sequence=AGAACTA;
3	fimo	nucleotide_motif	999528	999534	29.3	-	.	Name=DARACWW_3:999521-999534(-)+;Alias=MEME-1;ID=DARACWW-MEME-1-1-3:999521-999534(-);pvalue=0.00116;qvalue=0.0681;sequence=AAGACTA;
3	fimo	nucleotide_motif	1036514	1036520	28	+	.	Name=DARACWW_3:1036508-1036521(+)+;Alias=MEME-1;ID=DARACWW-MEME-1-1-3:1036508-1036521(+);pvalue=0.00159;qvalue=0.0732;sequence=GAAACAT;
3	fimo	nucleotide_motif	1072112	1072118	28	-	.	Name=DARACWW_3:1072108-1072121(-)+;Alias=MEME-1;ID=DARACWW-MEME-1-1-3:1072108-1072121(-);pvalue=0.00159;qvalue=0.0732;sequence=GAAACAT;
3	fimo	nucleotide_motif	1083225	1083231	27.1	+	.	Name=DARACWW_3:1083220-1083233(+)+;Alias=MEME-1;ID=DARACWW-MEME-1-1-3:1083220-1083233(+);pvalue=0.00195;qvalue=0.0766;sequence=TGAACTT;
3	fimo	nucleotide_motif	1083232	1083238	26.4	+	.	Name=DARACWW_3:1083227-1083240(+)+;Alias=MEME-1;ID=DARACWW-MEME-1-1-3:1083227-1083240(+);pvalue=0.00229;qvalue=0.0778;sequence=GGAACTT;
3	fimo	nucleotide_motif	1113103	1113109	38.4	-	.	Name=DARACWW_3:1113099-1113112(-)+;Alias=MEME-1;ID=DARACWW-MEME-1-1-3:1113099-1113112(-);pvalue=0.000143;qvalue=0.0467;sequence=GAGACTT;
3	fimo	nucleotide_motif	1146859	1146865	23	-	.	Name=DARACWW_3:1146855-1146868(-)+;Alias=MEME-1;ID=DARACWW-MEME-1-1-3:1146855-1146868(-);pvalue=0.00506;qvalue=0.0905;sequence=AAAACAA;
3	fimo	nucleotide_motif	1153803	1153809	24.2	-	.	Name=DARACWW_3:1153800-1153814(-)+;Alias=MEME-1;ID=DARACWW-MEME-1-1-3:1153800-1153814(-);pvalue=0.00379;qvalue=0.0872;sequence=AAGACCT;
3	fimo	nucleotide_motif	1168385	1168391	41.1	+	.	Name=DARACWW_3:1168379-1168392(+)+;Alias=MEME-1;ID=DARACWW-MEME-1-1-3:1168379-1168392(+);pvalue=7.71e-05;qvalue=0.0467;sequence=TAGACTT;
3	fimo	nucleotide_motif	1168477	1168483	35	+	.	Name=DARACWW_3:1168471-1168484(+)+;Alias=MEME-1;ID=DARACWW-MEME-1-1-3:1168471-1168484(+);pvalue=0.000319;qvalue=0.0508;sequence=TAAACTT;
3	fimo	nucleotide_motif	1168529	1168535	27.7	+	.	Name=DARACWW_3:1168521-1168535(+)+;Alias=MEME-1;ID=DARACWW-MEME-1-1-3:1168521-1168535(+);pvalue=0.0017;qvalue=0.0732;sequence=AAAACAT;
3	fimo	nucleotide_motif	1189679	1189685	23.6	-	.	Name=DARACWW_3:1189675-1189688(-)+;Alias=MEME-1;ID=DARACWW-MEME-1-1-3:1189675-1189688(-);pvalue=0.00439;qvalue=0.0905;sequence=CAAACAT;
3	fimo	nucleotide_motif	1260714	1260720	28.5	+	.	Name=DARACWW_3:1260707-1260721(+)+;Alias=MEME-1;ID=DARACWW-MEME-1-1-3:1260707-1260721(+);pvalue=0.00141;qvalue=0.0732;sequence=AAGACTC;
3	fimo	nucleotide_motif	1303617	1303623	23.3	-	.	Name=DARACWW_3:1303613-1303626(-)+;Alias=MEME-1;ID=DARACWW-MEME-1-1-3:1303613-1303626(-);pvalue=0.00471;qvalue=0.0905;sequence=TAAACAC;
3	fimo	nucleotide_motif	1303895	1303901	25.6	-	.	Name=DARACWW_3:1303891-1303904(-)+;Alias=MEME-1;ID=DARACWW-MEME-1-1-3:1303891-1303904(-);pvalue=0.00274;qvalue=0.0794;sequence=CAGACAT;
3	fimo	nucleotide_motif	1331514	1331520	22.2	+	.	Name=DARACWW_3:1331510-1331523(+)+;Alias=MEME-1;ID=DARACWW-MEME-1-1-3:1331510-1331523(+);pvalue=0.00599;qvalue=0.0965;sequence=ATGACTT;
3	fimo	nucleotide_motif	1331530	1331536	35	+	.	Name=DARACWW_3:1331524-1331538(+)+;Alias=MEME-1;ID=DARACWW-MEME-1-1-3:1331524-1331538(+);pvalue=0.000319;qvalue=0.0508;sequence=TAAACTT;
3	fimo	nucleotide_motif	1346240	1346246	24.6	+	.	Name=DARACWW_3:1346236-1346249(+)+;Alias=MEME-1;ID=DARACWW-MEME-1-1-3:1346236-1346249(+);pvalue=0.00348;qvalue=0.0846;sequence=GAGACAC;
3	fimo	nucleotide_motif	1358105	1358111	36.5	+	.	Name=DARACWW_3:1358097-1358112(+)+;Alias=MEME-1;ID=DARACWW-MEME-1-1-3:1358097-1358112(+);pvalue=0.000224;qvalue=0.0467;sequence=AAGACTT;
3	fimo	nucleotide_motif	1362161	1362167	32.3	+	.	Name=DARACWW_3:1362156-1362170(+)+;Alias=MEME-1;ID=DARACWW-MEME-1-1-3:1362156-1362170(+);pvalue=0.000582;qvalue=0.0548;sequence=TAGACAT;
3	fimo	nucleotide_motif	1362231	1362237	28	+	.	Name=DARACWW_3:1362225-1362238(+)+;Alias=MEME-1;ID=DARACWW-MEME-1-1-3:1362225-1362238(+);pvalue=0.00159;qvalue=0.0732;sequence=GAAACAT;
3	fimo	nucleotide_motif	1367591	1367597	27.1	+	.	Name=DARACWW_3:1367590-1367603(+)+;Alias=MEME-1;ID=DARACWW-MEME-1-1-3:1367590-1367603(+);pvalue=0.00195;qvalue=0.0766;sequence=TGAACTT;
3	fimo	nucleotide_motif	1367704	1367710	33	+	.	Name=DARACWW_3:1367697-1367710(+)+;Alias=MEME-1;ID=DARACWW-MEME-1-1-3:1367697-1367710(+);pvalue=0.0005;qvalue=0.0508;sequence=AAAACTT;
3	fimo	nucleotide_motif	1391825	1391831	27.4	-	.	Name=DARACWW_3:1391821-1391834(-)+;Alias=MEME-1;ID=DARACWW-MEME-1-1-3:1391821-1391834(-);pvalue=0.0018;qvalue=0.0746;sequence=TAAACTA;
3	fimo	nucleotide_motif	1425946	1425952	24.9	+	.	Name=DARACWW_3:1425939-1425953(+)+;Alias=MEME-1;ID=DARACWW-MEME-1-1-3:1425939-1425953(+);pvalue=0.00323;qvalue=0.0822;sequence=AAGACAA;
3	fimo	nucleotide_motif	1453173	1453179	23	-	.	Name=DARACWW_3:1453170-1453183(-)+;Alias=MEME-1;ID=DARACWW-MEME-1-1-3:1453170-1453183(-);pvalue=0.00506;qvalue=0.0905;sequence=TAAACCT;
3	fimo	nucleotide_motif	1453228	1453234	23.6	-	.	Name=DARACWW_3:1453224-1453237(-)+;Alias=MEME-1;ID=DARACWW-MEME-1-1-3:1453224-1453237(-);pvalue=0.00439;qvalue=0.0905;sequence=CAAACAT;
3	fimo	nucleotide_motif	1493518	1493524	41.1	+	.	Name=DARACWW_3:1493512-1493525(+)+;Alias=MEME-1;ID=DARACWW-MEME-1-1-3:1493512-1493525(+);pvalue=7.71e-05;qvalue=0.0467;sequence=TAGACTT;
3	fimo	nucleotide_motif	1527062	1527068	41.1	-	.	Name=DARACWW_3:1527060-1527073(-)+;Alias=MEME-1;ID=DARACWW-MEME-1-1-3:1527060-1527073(-);pvalue=7.71e-05;qvalue=0.0467;sequence=TAGACTT;
3	fimo	nucleotide_motif	1594907	1594913	27.1	+	.	Name=DARACWW_3:1594902-1594915(+)+;Alias=MEME-1;ID=DARACWW-MEME-1-1-3:1594902-1594915(+);pvalue=0.00195;qvalue=0.0766;sequence=TGAACTT;
3	fimo	nucleotide_motif	1612248	1612254	23	+	.	Name=DARACWW_3:1612240-1612254(+)+;Alias=MEME-1;ID=DARACWW-MEME-1-1-3:1612240-1612254(+);pvalue=0.00506;qvalue=0.0905;sequence=AAAACTG;
3	fimo	nucleotide_motif	1622794	1622800	30.2	+	.	Name=DARACWW_3:1622790-1622803(+)+;Alias=MEME-1;ID=DARACWW-MEME-1-1-3:1622790-1622803(+);pvalue=0.000945;qvalue=0.0635;sequence=TGGACTT;
3	fimo	nucleotide_motif	1622854	1622860	21.7	+	.	Name=DARACWW_3:1622849-1622862(+)+;Alias=MEME-1;ID=DARACWW-MEME-1-1-3:1622849-1622862(+);pvalue=0.00671;qvalue=0.0992;sequence=GGAACTC;
3	fimo	nucleotide_motif	1622880	1622886	25.6	+	.	Name=DARACWW_3:1622874-1622890(+)+;Alias=MEME-1;ID=DARACWW-MEME-1-1-3:1622874-1622890(+);pvalue=0.00274;qvalue=0.0794;sequence=CAGACAT;
3	fimo	nucleotide_motif	1622949	1622955	35	+	.	Name=DARACWW_3:1622943-1622958(+)+;Alias=MEME-1;ID=DARACWW-MEME-1-1-3:1622943-1622958(+);pvalue=0.000319;qvalue=0.0508;sequence=TAAACTT;
3	fimo	nucleotide_motif	1731156	1731162	22.1	-	.	Name=DARACWW_3:1731152-1731165(-)+;Alias=MEME-1;ID=DARACWW-MEME-1-1-3:1731152-1731165(-);pvalue=0.00612;qvalue=0.0968;sequence=TAGACAG;
3	fimo	nucleotide_motif	1755576	1755582	21.9	-	.	Name=DARACWW_3:1755571-1755584(-)+;Alias=MEME-1;ID=DARACWW-MEME-1-1-3:1755571-1755584(-);pvalue=0.00652;qvalue=0.0978;sequence=AAGATTT;
3	fimo	nucleotide_motif	1826174	1826180	33	-	.	Name=DARACWW_3:1826170-1826183(-)+;Alias=MEME-1;ID=DARACWW-MEME-1-1-3:1826170-1826183(-);pvalue=0.0005;qvalue=0.0508;sequence=AAAACTT;
3	fimo	nucleotide_motif	1869853	1869859	41.1	+	.	Name=DARACWW_3:1869847-1869860(+)+;Alias=MEME-1;ID=DARACWW-MEME-1-1-3:1869847-1869860(+);pvalue=7.71e-05;qvalue=0.0467;sequence=TAGACTT;
3	fimo	nucleotide_motif	1909675	1909681	36.5	+	.	Name=DARACWW_3:1909669-1909682(+)+;Alias=MEME-1;ID=DARACWW-MEME-1-1-3:1909669-1909682(+);pvalue=0.000224;qvalue=0.0467;sequence=AAGACTT;
3	fimo	nucleotide_motif	1913141	1913147	24.2	-	.	Name=DARACWW_3:1913137-1913150(-)+;Alias=MEME-1;ID=DARACWW-MEME-1-1-3:1913137-1913150(-);pvalue=0.00379;qvalue=0.0872;sequence=AAGACCT;
3	fimo	nucleotide_motif	1946760	1946766	27.7	+	.	Name=DARACWW_3:1946753-1946766(+)+;Alias=MEME-1;ID=DARACWW-MEME-1-1-3:1946753-1946766(+);pvalue=0.0017;qvalue=0.0732;sequence=AAAACAT;
3	fimo	nucleotide_motif	1946810	1946816	23	+	.	Name=DARACWW_3:1946806-1946819(+)+;Alias=MEME-1;ID=DARACWW-MEME-1-1-3:1946806-1946819(+);pvalue=0.00506;qvalue=0.0905;sequence=TTGACTT;
3	fimo	nucleotide_motif	1990567	1990573	29.7	-	.	Name=DARACWW_3:1990565-1990578(-)+;Alias=MEME-1;ID=DARACWW-MEME-1-1-3:1990565-1990578(-);pvalue=0.00108;qvalue=0.0664;sequence=TAGACTC;
3	fimo	nucleotide_motif	1990610	1990616	24.7	-	.	Name=DARACWW_3:1990604-1990617(-)+;Alias=MEME-1;ID=DARACWW-MEME-1-1-3:1990604-1990617(-);pvalue=0.00342;qvalue=0.0846;sequence=CAGACTA;
3	fimo	nucleotide_motif	2019562	2019568	22.1	+	.	Name=DARACWW_3:2019559-2019573(+)+;Alias=MEME-1;ID=DARACWW-MEME-1-1-3:2019559-2019573(+);pvalue=0.00612;qvalue=0.0968;sequence=CAAACTC;
3	fimo	nucleotide_motif	2105635	2105641	31.3	-	.	Name=DARACWW_3:2105633-2105646(-)+;Alias=MEME-1;ID=DARACWW-MEME-1-1-3:2105633-2105646(-);pvalue=0.000737;qvalue=0.0566;sequence=AAGACAT;
3	fimo	nucleotide_motif	2114341	2114347	25.7	-	.	Name=DARACWW_3:2114337-2114350(-)+;Alias=MEME-1;ID=DARACWW-MEME-1-1-3:2114337-2114350(-);pvalue=0.00267;qvalue=0.0794;sequence=TAGACAA;
3	fimo	nucleotide_motif	2117453	2117459	25.7	-	.	Name=DARACWW_3:2117446-2117460(-)+;Alias=MEME-1;ID=DARACWW-MEME-1-1-3:2117446-2117460(-);pvalue=0.00267;qvalue=0.0794;sequence=TAGACAA;
3	fimo	nucleotide_motif	2117463	2117469	36.5	-	.	Name=DARACWW_3:2117457-2117470(-)+;Alias=MEME-1;ID=DARACWW-MEME-1-1-3:2117457-2117470(-);pvalue=0.000224;qvalue=0.0467;sequence=AAGACTT;
3	fimo	nucleotide_motif	2117495	2117501	31.9	-	.	Name=DARACWW_3:2117488-2117502(-)+;Alias=MEME-1;ID=DARACWW-MEME-1-1-3:2117488-2117502(-);pvalue=0.000651;qvalue=0.0555;sequence=GAGACAT;
3	fimo	nucleotide_motif	2123897	2123903	33	+	.	Name=DARACWW_3:2123893-2123906(+)+;Alias=MEME-1;ID=DARACWW-MEME-1-1-3:2123893-2123906(+);pvalue=0.0005;qvalue=0.0508;sequence=AAAACTT;
3	fimo	nucleotide_motif	2125859	2125865	22.5	+	.	Name=DARACWW_3:2125858-2125871(+)+;Alias=MEME-1;ID=DARACWW-MEME-1-1-3:2125858-2125871(+);pvalue=0.00567;qvalue=0.0952;sequence=AAAACAC;
3	fimo	nucleotide_motif	2125983	2125989	31.3	+	.	Name=DARACWW_3:2125979-2125992(+)+;Alias=MEME-1;ID=DARACWW-MEME-1-1-3:2125979-2125992(+);pvalue=0.000737;qvalue=0.0566;sequence=AAGACAT;
3	fimo	nucleotide_motif	2158116	2158122	23.7	-	.	Name=DARACWW_3:2158112-2158125(-)+;Alias=MEME-1;ID=DARACWW-MEME-1-1-3:2158112-2158125(-);pvalue=0.00431;qvalue=0.0905;sequence=TAAACAA;
3	fimo	nucleotide_motif	2169075	2169081	25.5	+	.	Name=DARACWW_3:2169071-2169084(+)+;Alias=MEME-1;ID=DARACWW-MEME-1-1-3:2169071-2169084(+);pvalue=0.00281;qvalue=0.0801;sequence=TGGACAT;
3	fimo	nucleotide_motif	2194253	2194259	28	+	.	Name=DARACWW_3:2194247-2194260(+)+;Alias=MEME-1;ID=DARACWW-MEME-1-1-3:2194247-2194260(+);pvalue=0.00159;qvalue=0.0732;sequence=GAAACAT;
3	fimo	nucleotide_motif	2194297	2194303	25.7	-	.	Name=DARACWW_3:2194293-2194306(-)+;Alias=MEME-1;ID=DARACWW-MEME-1-1-3:2194293-2194306(-);pvalue=0.00267;qvalue=0.0794;sequence=TAGACAA;
3	fimo	nucleotide_motif	2243129	2243135	28	-	.	Name=DARACWW_3:2243125-2243138(-)+;Alias=MEME-1;ID=DARACWW-MEME-1-1-3:2243125-2243138(-);pvalue=0.00159;qvalue=0.0732;sequence=GAAACAT;
3	fimo	nucleotide_motif	2253377	2253383	25.6	+	.	Name=DARACWW_3:2253371-2253384(+)+;Alias=MEME-1;ID=DARACWW-MEME-1-1-3:2253371-2253384(+);pvalue=0.00274;qvalue=0.0794;sequence=CAGACAT;
3	fimo	nucleotide_motif	2253421	2253427	23	+	.	Name=DARACWW_3:2253417-2253430(+)+;Alias=MEME-1;ID=DARACWW-MEME-1-1-3:2253417-2253430(+);pvalue=0.00506;qvalue=0.0905;sequence=TTGACTT;
3	fimo	nucleotide_motif	2263637	2263643	33	+	.	Name=DARACWW_3:2263630-2263643(+)+;Alias=MEME-1;ID=DARACWW-MEME-1-1-3:2263630-2263643(+);pvalue=0.0005;qvalue=0.0508;sequence=AAAACTT;
3	fimo	nucleotide_motif	2264983	2264989	27.7	-	.	Name=DARACWW_3:2264979-2264992(-)+;Alias=MEME-1;ID=DARACWW-MEME-1-1-3:2264979-2264992(-);pvalue=0.0017;qvalue=0.0732;sequence=AAAACAT;
3	fimo	nucleotide_motif	2265138	2265144	35	-	.	Name=DARACWW_3:2265134-2265147(-)+;Alias=MEME-1;ID=DARACWW-MEME-1-1-3:2265134-2265147(-);pvalue=0.000319;qvalue=0.0508;sequence=TAAACTT;
3	fimo	nucleotide_motif	2265161	2265167	25.2	-	.	Name=DARACWW_3:2265158-2265171(-)+;Alias=MEME-1;ID=DARACWW-MEME-1-1-3:2265158-2265171(-);pvalue=0.003;qvalue=0.0822;sequence=GAGACAA;
3	fimo	nucleotide_motif	2282236	2282242	32.3	+	.	Name=DARACWW_3:2282232-2282245(+)+;Alias=MEME-1;ID=DARACWW-MEME-1-1-3:2282232-2282245(+);pvalue=0.000582;qvalue=0.0548;sequence=TAGACAT;
3	fimo	nucleotide_motif	2282357	2282363	21.7	-	.	Name=DARACWW_3:2282351-2282364(-)+;Alias=MEME-1;ID=DARACWW-MEME-1-1-3:2282351-2282364(-);pvalue=0.00671;qvalue=0.0992;sequence=GGAACTC;
3	fimo	nucleotide_motif	2335745	2335751	28	-	.	Name=DARACWW_3:2335741-2335754(-)+;Alias=MEME-1;ID=DARACWW-MEME-1-1-3:2335741-2335754(-);pvalue=0.00159;qvalue=0.0732;sequence=GAAACAT;
3	fimo	nucleotide_motif	2380102	2380108	23	+	.	Name=DARACWW_3:2380096-2380111(+)+;Alias=MEME-1;ID=DARACWW-MEME-1-1-3:2380096-2380111(+);pvalue=0.00506;qvalue=0.0905;sequence=TTGACTT;
3	fimo	nucleotide_motif	2380161	2380167	24.7	+	.	Name=DARACWW_3:2380155-2380168(+)+;Alias=MEME-1;ID=DARACWW-MEME-1-1-3:2380155-2380168(+);pvalue=0.00342;qvalue=0.0846;sequence=CAGACTA;
3	fimo	nucleotide_motif	2384469	2384475	25.6	-	.	Name=DARACWW_3:2384465-2384478(-)+;Alias=MEME-1;ID=DARACWW-MEME-1-1-3:2384465-2384478(-);pvalue=0.00274;qvalue=0.0794;sequence=CAGACAT;
3	fimo	nucleotide_motif	2411362	2411368	24.2	-	.	Name=DARACWW_3:2411360-2411375(-)+;Alias=MEME-1;ID=DARACWW-MEME-1-1-3:2411360-2411375(-);pvalue=0.00379;qvalue=0.0872;sequence=AAGACCT;
3	fimo	nucleotide_motif	2444932	2444938	24.9	-	.	Name=DARACWW_3:2444930-2444943(-)+;Alias=MEME-1;ID=DARACWW-MEME-1-1-3:2444930-2444943(-);pvalue=0.00323;qvalue=0.0822;sequence=AAGACAA;
3	fimo	nucleotide_motif	2456669	2456675	22.2	+	.	Name=DARACWW_3:2456665-2456678(+)+;Alias=MEME-1;ID=DARACWW-MEME-1-1-3:2456665-2456678(+);pvalue=0.00599;qvalue=0.0965;sequence=ATGACTT;
3	fimo	nucleotide_motif	2459525	2459531	25.2	-	.	Name=DARACWW_3:2459521-2459534(-)+;Alias=MEME-1;ID=DARACWW-MEME-1-1-3:2459521-2459534(-);pvalue=0.003;qvalue=0.0822;sequence=GAGACTG;
3	fimo	nucleotide_motif	2484057	2484063	26	+	.	Name=DARACWW_3:2484055-2484068(+)+;Alias=MEME-1;ID=DARACWW-MEME-1-1-3:2484055-2484068(+);pvalue=0.00252;qvalue=0.0778;sequence=AAAACTC;
3	fimo	nucleotide_motif	2495729	2495735	26.5	+	.	Name=DARACWW_3:2495722-2495735(+)+;Alias=MEME-1;ID=DARACWW-MEME-1-1-3:2495722-2495735(+);pvalue=0.00222;qvalue=0.0769;sequence=AAAACTA;
3	fimo	nucleotide_motif	2531412	2531418	21.9	+	.	Name=DARACWW_3:2531409-2531422(+)+;Alias=MEME-1;ID=DARACWW-MEME-1-1-3:2531409-2531422(+);pvalue=0.00652;qvalue=0.0978;sequence=AAGATTT;
3	fimo	nucleotide_motif	2565858	2565864	25.7	+	.	Name=DARACWW_3:2565854-2565867(+)+;Alias=MEME-1;ID=DARACWW-MEME-1-1-3:2565854-2565867(+);pvalue=0.00267;qvalue=0.0794;sequence=TAGACTG;
3	fimo	nucleotide_motif	2565869	2565875	30.2	+	.	Name=DARACWW_3:2565865-2565878(+)+;Alias=MEME-1;ID=DARACWW-MEME-1-1-3:2565865-2565878(+);pvalue=0.000945;qvalue=0.0635;sequence=TGGACTT;
3	fimo	nucleotide_motif	2605517	2605523	29.7	-	.	Name=DARACWW_3:2605511-2605528(-)+;Alias=MEME-1;ID=DARACWW-MEME-1-1-3:2605511-2605528(-);pvalue=0.00108;qvalue=0.0664;sequence=TAGACTC;
3	fimo	nucleotide_motif	2605613	2605619	36.5	-	.	Name=DARACWW_3:2605609-2605622(-)+;Alias=MEME-1;ID=DARACWW-MEME-1-1-3:2605609-2605622(-);pvalue=0.000224;qvalue=0.0467;sequence=AAGACTT;
3	fimo	nucleotide_motif	2605646	2605652	23.7	-	.	Name=DARACWW_3:2605640-2605653(-)+;Alias=MEME-1;ID=DARACWW-MEME-1-1-3:2605640-2605653(-);pvalue=0.00431;qvalue=0.0905;sequence=TAAACTG;
3	fimo	nucleotide_motif	2608515	2608521	24.7	-	.	Name=DARACWW_3:2608513-2608526(-)+;Alias=MEME-1;ID=DARACWW-MEME-1-1-3:2608513-2608526(-);pvalue=0.00342;qvalue=0.0846;sequence=CAGACTA;
3	fimo	nucleotide_motif	2608628	2608634	29.7	-	.	Name=DARACWW_3:2608626-2608639(-)+;Alias=MEME-1;ID=DARACWW-MEME-1-1-3:2608626-2608639(-);pvalue=0.00108;qvalue=0.0664;sequence=TAGACTC;
3	fimo	nucleotide_motif	2615584	2615590	25.5	-	.	Name=DARACWW_3:2615578-2615591(-)+;Alias=MEME-1;ID=DARACWW-MEME-1-1-3:2615578-2615591(-);pvalue=0.00281;qvalue=0.0801;sequence=TGGACAT;
3	fimo	nucleotide_motif	2642633	2642639	27.4	+	.	Name=DARACWW_3:2642627-2642641(+)+;Alias=MEME-1;ID=DARACWW-MEME-1-1-3:2642627-2642641(+);pvalue=0.0018;qvalue=0.0746;sequence=TAAACTA;
3	fimo	nucleotide_motif	2651505	2651511	33	-	.	Name=DARACWW_3:2651499-2651512(-)+;Alias=MEME-1;ID=DARACWW-MEME-1-1-3:2651499-2651512(-);pvalue=0.0005;qvalue=0.0508;sequence=AAAACTT;
3	fimo	nucleotide_motif	2654676	2654682	23.5	-	.	Name=DARACWW_3:2654672-2654685(-)+;Alias=MEME-1;ID=DARACWW-MEME-1-1-3:2654672-2654685(-);pvalue=0.00447;qvalue=0.0905;sequence=TGAACAT;
3	fimo	nucleotide_motif	2713142	2713148	31.3	+	.	Name=DARACWW_3:2713136-2713149(+)+;Alias=MEME-1;ID=DARACWW-MEME-1-1-3:2713136-2713149(+);pvalue=0.000737;qvalue=0.0566;sequence=AAGACAT;
3	fimo	nucleotide_motif	2717147	2717153	28.7	+	.	Name=DARACWW_3:2717143-2717156(+)+;Alias=MEME-1;ID=DARACWW-MEME-1-1-3:2717143-2717156(+);pvalue=0.00134;qvalue=0.073;sequence=GAGACTC;
3	fimo	nucleotide_motif	2760250	2760256	23.7	+	.	Name=DARACWW_3:2760244-2760257(+)+;Alias=MEME-1;ID=DARACWW-MEME-1-1-3:2760244-2760257(+);pvalue=0.00431;qvalue=0.0905;sequence=TAAACTG;
3	fimo	nucleotide_motif	2823226	2823232	21.9	-	.	Name=DARACWW_3:2823221-2823235(-)+;Alias=MEME-1;ID=DARACWW-MEME-1-1-3:2823221-2823235(-);pvalue=0.00652;qvalue=0.0978;sequence=AAGATTT;
3	fimo	nucleotide_motif	2840543	2840549	25.7	+	.	Name=DARACWW_3:2840539-2840552(+)+;Alias=MEME-1;ID=DARACWW-MEME-1-1-3:2840539-2840552(+);pvalue=0.00267;qvalue=0.0794;sequence=TAGACAA;
3	fimo	nucleotide_motif	2860477	2860483	21.8	+	.	Name=DARACWW_3:2860469-2860484(+)+;Alias=MEME-1;ID=DARACWW-MEME-1-1-3:2860469-2860484(+);pvalue=0.00665;qvalue=0.0986;sequence=AAGACAG;
3	fimo	nucleotide_motif	2860503	2860509	23.3	+	.	Name=DARACWW_3:2860497-2860510(+)+;Alias=MEME-1;ID=DARACWW-MEME-1-1-3:2860497-2860510(+);pvalue=0.00471;qvalue=0.0905;sequence=GAAACAA;
3	fimo	nucleotide_motif	2917909	2917915	22.7	+	.	Name=DARACWW_3:2917903-2917916(+)+;Alias=MEME-1;ID=DARACWW-MEME-1-1-3:2917903-2917916(+);pvalue=0.00537;qvalue=0.0935;sequence=GAAACAC;
3	fimo	nucleotide_motif	2917939	2917945	34	+	.	Name=DARACWW_3:2917933-2917946(+)+;Alias=MEME-1;ID=DARACWW-MEME-1-1-3:2917933-2917946(+);pvalue=0.0004;qvalue=0.0508;sequence=GAAACTT;
3	fimo	nucleotide_motif	2955486	2955492	21.9	+	.	Name=DARACWW_3:2955483-2955496(+)+;Alias=MEME-1;ID=DARACWW-MEME-1-1-3:2955483-2955496(+);pvalue=0.00652;qvalue=0.0978;sequence=AAGATTT;
3	fimo	nucleotide_motif	2986754	2986760	26.2	-	.	Name=DARACWW_3:2986750-2986763(-)+;Alias=MEME-1;ID=DARACWW-MEME-1-1-3:2986750-2986763(-);pvalue=0.00237;qvalue=0.0778;sequence=AGAACTT;
3	fimo	nucleotide_motif	2986760	2986766	24.3	-	.	Name=DARACWW_3:2986753-2986766(-)+;Alias=MEME-1;ID=DARACWW-MEME-1-2-3:2986753-2986766(-);pvalue=0.00367;qvalue=0.0857;sequence=TGGACTA;
3	fimo	nucleotide_motif	3014702	3014708	26.7	+	.	Name=DARACWW_3:3014696-3014709(+)+;Alias=MEME-1;ID=DARACWW-MEME-1-1-3:3014696-3014709(+);pvalue=0.00212;qvalue=0.0766;sequence=TAAACTC;
3	fimo	nucleotide_motif	3022868	3022874	26	+	.	Name=DARACWW_3:3022862-3022879(+)+;Alias=MEME-1;ID=DARACWW-MEME-1-1-3:3022862-3022879(+);pvalue=0.00252;qvalue=0.0778;sequence=AAAACTC;
3	fimo	nucleotide_motif	3023283	3023289	36.5	-	.	Name=DARACWW_3:3023281-3023294(-)+;Alias=MEME-1;ID=DARACWW-MEME-1-1-3:3023281-3023294(-);pvalue=0.000224;qvalue=0.0467;sequence=AAGACTT;
3	fimo	nucleotide_motif	3036535	3036541	25.7	+	.	Name=DARACWW_3:3036529-3036542(+)+;Alias=MEME-1;ID=DARACWW-MEME-1-1-3:3036529-3036542(+);pvalue=0.00267;qvalue=0.0794;sequence=TAGACAA;
3	fimo	nucleotide_motif	3036554	3036560	35	+	.	Name=DARACWW_3:3036548-3036561(+)+;Alias=MEME-1;ID=DARACWW-MEME-1-1-3:3036548-3036561(+);pvalue=0.000319;qvalue=0.0508;sequence=TAAACTT;
3	fimo	nucleotide_motif	3103854	3103860	26.5	+	.	Name=DARACWW_3:3103846-3103860(+)+;Alias=MEME-1;ID=DARACWW-MEME-1-1-3:3103846-3103860(+);pvalue=0.00222;qvalue=0.0769;sequence=AAAACTA;
3	fimo	nucleotide_motif	3164162	3164168	22.7	+	.	Name=DARACWW_3:3164158-3164171(+)+;Alias=MEME-1;ID=DARACWW-MEME-1-1-3:3164158-3164171(+);pvalue=0.00537;qvalue=0.0935;sequence=GAAACAC;
3	fimo	nucleotide_motif	3164195	3164201	22.5	+	.	Name=DARACWW_3:3164190-3164203(+)+;Alias=MEME-1;ID=DARACWW-MEME-1-1-3:3164190-3164203(+);pvalue=0.00567;qvalue=0.0952;sequence=TGAACTA;
3	fimo	nucleotide_motif	3171283	3171289	23.7	-	.	Name=DARACWW_3:3171279-3171292(-)+;Alias=MEME-1;ID=DARACWW-MEME-1-1-3:3171279-3171292(-);pvalue=0.00431;qvalue=0.0905;sequence=TAAACAA;
3	fimo	nucleotide_motif	3173571	3173577	22	-	.	Name=DARACWW_3:3173564-3173577(-)+;Alias=MEME-1;ID=DARACWW-MEME-1-1-3:3173564-3173577(-);pvalue=0.00626;qvalue=0.0978;sequence=GGAACTA;
3	fimo	nucleotide_motif	3219610	3219616	21.9	-	.	Name=DARACWW_3:3219605-3219618(-)+;Alias=MEME-1;ID=DARACWW-MEME-1-1-3:3219605-3219618(-);pvalue=0.00642;qvalue=0.0978;sequence=GAGATTT;
3	fimo	nucleotide_motif	3219654	3219660	24.2	-	.	Name=DARACWW_3:3219652-3219667(-)+;Alias=MEME-1;ID=DARACWW-MEME-1-1-3:3219652-3219667(-);pvalue=0.00379;qvalue=0.0872;sequence=AAGACCT;
3	fimo	nucleotide_motif	3219699	3219705	26.7	-	.	Name=DARACWW_3:3219695-3219708(-)+;Alias=MEME-1;ID=DARACWW-MEME-1-1-3:3219695-3219708(-);pvalue=0.00212;qvalue=0.0766;sequence=TAAACTC;
3	fimo	nucleotide_motif	3233775	3233781	25.5	-	.	Name=DARACWW_3:3233771-3233784(-)+;Alias=MEME-1;ID=DARACWW-MEME-1-1-3:3233771-3233784(-);pvalue=0.00281;qvalue=0.0801;sequence=TGGACAT;
3	fimo	nucleotide_motif	3242367	3242373	23.7	+	.	Name=DARACWW_3:3242361-3242374(+)+;Alias=MEME-1;ID=DARACWW-MEME-1-1-3:3242361-3242374(+);pvalue=0.00431;qvalue=0.0905;sequence=TAAACTG;
3	fimo	nucleotide_motif	3270825	3270831	22.8	+	.	Name=DARACWW_3:3270820-3270833(+)+;Alias=MEME-1;ID=DARACWW-MEME-1-1-3:3270820-3270833(+);pvalue=0.0053;qvalue=0.093;sequence=AGAACAT;
3	fimo	nucleotide_motif	3325246	3325252	22.5	-	.	Name=DARACWW_3:3325244-3325257(-)+;Alias=MEME-1;ID=DARACWW-MEME-1-1-3:3325244-3325257(-);pvalue=0.00567;qvalue=0.0952;sequence=AAAACAC;
3	fimo	nucleotide_motif	3335165	3335171	22.8	-	.	Name=DARACWW_3:3335157-3335171(-)+;Alias=MEME-1;ID=DARACWW-MEME-1-1-3:3335157-3335171(-);pvalue=0.0053;qvalue=0.093;sequence=CAAACTA;
3	fimo	nucleotide_motif	3372332	3372338	31.3	-	.	Name=DARACWW_3:3372328-3372341(-)+;Alias=MEME-1;ID=DARACWW-MEME-1-1-3:3372328-3372341(-);pvalue=0.000737;qvalue=0.0566;sequence=AAGACAT;
3	fimo	nucleotide_motif	3381800	3381806	33	-	.	Name=DARACWW_3:3381796-3381809(-)+;Alias=MEME-1;ID=DARACWW-MEME-1-1-3:3381796-3381809(-);pvalue=0.0005;qvalue=0.0508;sequence=AAAACTT;
3	fimo	nucleotide_motif	3391173	3391179	29.3	-	.	Name=DARACWW_3:3391171-3391185(-)+;Alias=MEME-1;ID=DARACWW-MEME-1-1-3:3391171-3391185(-);pvalue=0.00116;qvalue=0.0681;sequence=AAGACTA;
3	fimo	nucleotide_motif	3400593	3400599	26	+	.	Name=DARACWW_3:3400586-3400599(+)+;Alias=MEME-1;ID=DARACWW-MEME-1-1-3:3400586-3400599(+);pvalue=0.00252;qvalue=0.0778;sequence=AAAACTC;
3	fimo	nucleotide_motif	3400629	3400635	26.1	+	.	Name=DARACWW_3:3400623-3400636(+)+;Alias=MEME-1;ID=DARACWW-MEME-1-1-3:3400623-3400636(+);pvalue=0.00244;qvalue=0.0778;sequence=GAAACTC;
3	fimo	nucleotide_motif	3419647	3419653	23.3	+	.	Name=DARACWW_3:3419641-3419654(+)+;Alias=MEME-1;ID=DARACWW-MEME-1-1-3:3419641-3419654(+);pvalue=0.00471;qvalue=0.0905;sequence=GAAACAA;
3	fimo	nucleotide_motif	3419651	3419657	27.3	+	.	Name=DARACWW_3:3419646-3419660(+)+;Alias=MEME-1;ID=DARACWW-MEME-1-1-3:3419646-3419660(+);pvalue=0.00188;qvalue=0.0756;sequence=CAAACTT;
3	fimo	nucleotide_motif	3422177	3422183	22.2	-	.	Name=DARACWW_3:3422174-3422187(-)+;Alias=MEME-1;ID=DARACWW-MEME-1-1-3:3422174-3422187(-);pvalue=0.00599;qvalue=0.0965;sequence=AAAACCT;
3	fimo	nucleotide_motif	3482324	3482330	28.7	-	.	Name=DARACWW_3:3482320-3482335(-)+;Alias=MEME-1;ID=DARACWW-MEME-1-1-3:3482320-3482335(-);pvalue=0.00134;qvalue=0.073;sequence=GAGACTC;
3	fimo	nucleotide_motif	3502249	3502255	23.3	+	.	Name=DARACWW_3:3502243-3502256(+)+;Alias=MEME-1;ID=DARACWW-MEME-1-1-3:3502243-3502256(+);pvalue=0.00471;qvalue=0.0905;sequence=GAAACAA;
3	fimo	nucleotide_motif	3522928	3522934	24.9	+	.	Name=DARACWW_3:3522921-3522935(+)+;Alias=MEME-1;ID=DARACWW-MEME-1-1-3:3522921-3522935(+);pvalue=0.00323;qvalue=0.0822;sequence=AAGACAA;
3	fimo	nucleotide_motif	3535654	3535660	21.9	-	.	Name=DARACWW_3:3535649-3535662(-)+;Alias=MEME-1;ID=DARACWW-MEME-1-1-3:3535649-3535662(-);pvalue=0.00652;qvalue=0.0978;sequence=AAGATTT;
3	fimo	nucleotide_motif	3577966	3577972	21.9	+	.	Name=DARACWW_3:3577962-3577977(+)+;Alias=MEME-1;ID=DARACWW-MEME-1-1-3:3577962-3577977(+);pvalue=0.00642;qvalue=0.0978;sequence=AGAACTA;
3	fimo	nucleotide_motif	3580385	3580391	24.3	+	.	Name=DARACWW_3:3580379-3580392(+)+;Alias=MEME-1;ID=DARACWW-MEME-1-1-3:3580379-3580392(+);pvalue=0.00367;qvalue=0.0857;sequence=GAGACCT;
3	fimo	nucleotide_motif	3580393	3580399	26	+	.	Name=DARACWW_3:3580386-3580400(+)+;Alias=MEME-1;ID=DARACWW-MEME-1-1-3:3580386-3580400(+);pvalue=0.00252;qvalue=0.0778;sequence=AAAACTC;
3	fimo	nucleotide_motif	3605371	3605377	33	-	.	Name=DARACWW_3:3605367-3605381(-)+;Alias=MEME-1;ID=DARACWW-MEME-1-1-3:3605367-3605381(-);pvalue=0.0005;qvalue=0.0508;sequence=AAAACTT;
3	fimo	nucleotide_motif	3605378	3605384	24.2	-	.	Name=DARACWW_3:3605374-3605387(-)+;Alias=MEME-1;ID=DARACWW-MEME-1-1-3:3605374-3605387(-);pvalue=0.00379;qvalue=0.0872;sequence=AAGACCT;
3	fimo	nucleotide_motif	3621572	3621578	23	-	.	Name=DARACWW_3:3621568-3621582(-)+;Alias=MEME-1;ID=DARACWW-MEME-1-1-3:3621568-3621582(-);pvalue=0.00506;qvalue=0.0905;sequence=TTGACTT;
3	fimo	nucleotide_motif	3623636	3623642	22.8	-	.	Name=DARACWW_3:3623632-3623645(-)+;Alias=MEME-1;ID=DARACWW-MEME-1-1-3:3623632-3623645(-);pvalue=0.0053;qvalue=0.093;sequence=AGAACAT;
3	fimo	nucleotide_motif	3645692	3645698	22	+	.	Name=DARACWW_3:3645690-3645703(+)+;Alias=MEME-1;ID=DARACWW-MEME-1-1-3:3645690-3645703(+);pvalue=0.00626;qvalue=0.0978;sequence=TGAACTC;
3	fimo	nucleotide_motif	3674008	3674014	23	+	.	Name=DARACWW_3:3674002-3674016(+)+;Alias=MEME-1;ID=DARACWW-MEME-1-1-3:3674002-3674016(+);pvalue=0.00506;qvalue=0.0905;sequence=AAAACAA;
3	fimo	nucleotide_motif	3674056	3674062	33	+	.	Name=DARACWW_3:3674048-3674062(+)+;Alias=MEME-1;ID=DARACWW-MEME-1-1-3:3674048-3674062(+);pvalue=0.0005;qvalue=0.0508;sequence=AAAACTT;
3	fimo	nucleotide_motif	3701340	3701346	21.7	+	.	Name=DARACWW_3:3701337-3701351(+)+;Alias=MEME-1;ID=DARACWW-MEME-1-1-3:3701337-3701351(+);pvalue=0.00677;qvalue=0.0998;sequence=AGAACTC;
3	fimo	nucleotide_motif	3702221	3702227	36.5	-	.	Name=DARACWW_3:3702219-3702233(-)+;Alias=MEME-1;ID=DARACWW-MEME-1-1-3:3702219-3702233(-);pvalue=0.000224;qvalue=0.0467;sequence=AAGACTT;
3	fimo	nucleotide_motif	3702232	3702238	22.2	-	.	Name=DARACWW_3:3702228-3702243(-)+;Alias=MEME-1;ID=DARACWW-MEME-1-1-3:3702228-3702243(-);pvalue=0.00599;qvalue=0.0965;sequence=AAAACCT;
3	fimo	nucleotide_motif	3709398	3709404	23	-	.	Name=DARACWW_3:3709391-3709404(-)+;Alias=MEME-1;ID=DARACWW-MEME-1-1-3:3709391-3709404(-);pvalue=0.00506;qvalue=0.0905;sequence=AAAACAA;
3	fimo	nucleotide_motif	3709454	3709460	28.7	-	.	Name=DARACWW_3:3709452-3709465(-)+;Alias=MEME-1;ID=DARACWW-MEME-1-1-3:3709452-3709465(-);pvalue=0.00134;qvalue=0.073;sequence=GAGACTC;
3	fimo	nucleotide_motif	3709464	3709470	26.5	-	.	Name=DARACWW_3:3709460-3709473(-)+;Alias=MEME-1;ID=DARACWW-MEME-1-1-3:3709460-3709473(-);pvalue=0.00222;qvalue=0.0769;sequence=AAAACTA;
3	fimo	nucleotide_motif	3728947	3728953	23	+	.	Name=DARACWW_3:3728940-3728953(+)+;Alias=MEME-1;ID=DARACWW-MEME-1-1-3:3728940-3728953(+);pvalue=0.00506;qvalue=0.0905;sequence=AAAACTG;
3	fimo	nucleotide_motif	3736240	3736246	22.2	+	.	Name=DARACWW_3:3736235-3736249(+)+;Alias=MEME-1;ID=DARACWW-MEME-1-1-3:3736235-3736249(+);pvalue=0.00599;qvalue=0.0965;sequence=AAAACCT;
3	fimo	nucleotide_motif	3736310	3736316	28	+	.	Name=DARACWW_3:3736304-3736317(+)+;Alias=MEME-1;ID=DARACWW-MEME-1-1-3:3736304-3736317(+);pvalue=0.00159;qvalue=0.0732;sequence=GAAACAT;
3	fimo	nucleotide_motif	3760271	3760277	23.7	+	.	Name=DARACWW_3:3760265-3760278(+)+;Alias=MEME-1;ID=DARACWW-MEME-1-1-3:3760265-3760278(+);pvalue=0.00431;qvalue=0.0905;sequence=TAAACAA;
3	fimo	nucleotide_motif	3761494	3761500	24.9	-	.	Name=DARACWW_3:3761492-3761505(-)+;Alias=MEME-1;ID=DARACWW-MEME-1-1-3:3761492-3761505(-);pvalue=0.00323;qvalue=0.0822;sequence=AAGACAA;
3	fimo	nucleotide_motif	3761673	3761679	22.2	-	.	Name=DARACWW_3:3761668-3761681(-)+;Alias=MEME-1;ID=DARACWW-MEME-1-1-3:3761668-3761681(-);pvalue=0.00599;qvalue=0.0965;sequence=TAGATTT;
3	fimo	nucleotide_motif	3761685	3761691	28.7	-	.	Name=DARACWW_3:3761681-3761696(-)+;Alias=MEME-1;ID=DARACWW-MEME-1-1-3:3761681-3761696(-);pvalue=0.00134;qvalue=0.073;sequence=GAGACTC;
3	fimo	nucleotide_motif	3778046	3778052	22.5	-	.	Name=DARACWW_3:3778042-3778056(-)+;Alias=MEME-1;ID=DARACWW-MEME-1-1-3:3778042-3778056(-);pvalue=0.00567;qvalue=0.0952;sequence=TGAACTA;
3	fimo	nucleotide_motif	3860365	3860371	26	-	.	Name=DARACWW_3:3860362-3860375(-)+;Alias=MEME-1;ID=DARACWW-MEME-1-1-3:3860362-3860375(-);pvalue=0.00252;qvalue=0.0778;sequence=AAAACTC;
3	fimo	nucleotide_motif	3925353	3925359	23	+	.	Name=DARACWW_3:3925347-3925360(+)+;Alias=MEME-1;ID=DARACWW-MEME-1-1-3:3925347-3925360(+);pvalue=0.00506;qvalue=0.0905;sequence=TTGACTT;
3	fimo	nucleotide_motif	3930208	3930214	21.9	-	.	Name=DARACWW_3:3930203-3930216(-)+;Alias=MEME-1;ID=DARACWW-MEME-1-1-3:3930203-3930216(-);pvalue=0.00652;qvalue=0.0978;sequence=AAGATTT;
3	fimo	nucleotide_motif	3937382	3937388	28.2	-	.	Name=DARACWW_3:3937378-3937391(-)+;Alias=MEME-1;ID=DARACWW-MEME-1-1-3:3937378-3937391(-);pvalue=0.00151;qvalue=0.0732;sequence=TAAACAT;
3	fimo	nucleotide_motif	3943718	3943724	23	+	.	Name=DARACWW_3:3943713-3943727(+)+;Alias=MEME-1;ID=DARACWW-MEME-1-1-3:3943713-3943727(+);pvalue=0.00506;qvalue=0.0905;sequence=TAAACCT;
3	fimo	nucleotide_motif	3960441	3960447	22.2	-	.	Name=DARACWW_3:3960436-3960449(-)+;Alias=MEME-1;ID=DARACWW-MEME-1-1-3:3960436-3960449(-);pvalue=0.00599;qvalue=0.0965;sequence=AAAACCT;
3	fimo	nucleotide_motif	3960449	3960455	26	-	.	Name=DARACWW_3:3960442-3960459(-)+;Alias=MEME-1;ID=DARACWW-MEME-1-1-3:3960442-3960459(-);pvalue=0.00252;qvalue=0.0778;sequence=AAAACTC;
3	fimo	nucleotide_motif	4020141	4020147	26.5	-	.	Name=DARACWW_3:4020138-4020151(-)+;Alias=MEME-1;ID=DARACWW-MEME-1-1-3:4020138-4020151(-);pvalue=0.00222;qvalue=0.0769;sequence=AAAACTA;
3	fimo	nucleotide_motif	4061009	4061015	26	-	.	Name=DARACWW_3:4061003-4061016(-)+;Alias=MEME-1;ID=DARACWW-MEME-1-1-3:4061003-4061016(-);pvalue=0.00252;qvalue=0.0778;sequence=AAAACTC;
3	fimo	nucleotide_motif	4061049	4061055	33	-	.	Name=DARACWW_3:4061043-4061056(-)+;Alias=MEME-1;ID=DARACWW-MEME-1-1-3:4061043-4061056(-);pvalue=0.0005;qvalue=0.0508;sequence=AAAACTT;
3	fimo	nucleotide_motif	4061121	4061127	26.1	-	.	Name=DARACWW_3:4061119-4061132(-)+;Alias=MEME-1;ID=DARACWW-MEME-1-1-3:4061119-4061132(-);pvalue=0.00244;qvalue=0.0778;sequence=GAAACTC;
3	fimo	nucleotide_motif	4063354	4063360	22.8	-	.	Name=DARACWW_3:4063349-4063363(-)+;Alias=MEME-1;ID=DARACWW-MEME-1-1-3:4063349-4063363(-);pvalue=0.0053;qvalue=0.093;sequence=CAAACTA;
3	fimo	nucleotide_motif	4063388	4063394	25.2	-	.	Name=DARACWW_3:4063384-4063398(-)+;Alias=MEME-1;ID=DARACWW-MEME-1-1-3:4063384-4063398(-);pvalue=0.003;qvalue=0.0822;sequence=GAGACTG;
3	fimo	nucleotide_motif	4074016	4074022	22.2	+	.	Name=DARACWW_3:4074008-4074022(+)+;Alias=MEME-1;ID=DARACWW-MEME-1-1-3:4074008-4074022(+);pvalue=0.00599;qvalue=0.0965;sequence=AAAACCT;
3	fimo	nucleotide_motif	4129816	4129822	25.6	+	.	Name=DARACWW_3:4129810-4129823(+)+;Alias=MEME-1;ID=DARACWW-MEME-1-1-3:4129810-4129823(+);pvalue=0.00274;qvalue=0.0794;sequence=CAGACAT;
3	fimo	nucleotide_motif	4129927	4129933	28.5	+	.	Name=DARACWW_3:4129920-4129933(+)+;Alias=MEME-1;ID=DARACWW-MEME-1-1-3:4129920-4129933(+);pvalue=0.00141;qvalue=0.0732;sequence=AAGACTC;
3	fimo	nucleotide_motif	4172302	4172308	35	-	.	Name=DARACWW_3:4172295-4172309(-)+;Alias=MEME-1;ID=DARACWW-MEME-1-1-3:4172295-4172309(-);pvalue=0.000319;qvalue=0.0508;sequence=TAAACTT;
3	fimo	nucleotide_motif	4183656	4183662	29.3	+	.	Name=DARACWW_3:4183650-4183663(+)+;Alias=MEME-1;ID=DARACWW-MEME-1-1-3:4183650-4183663(+);pvalue=0.00116;qvalue=0.0681;sequence=AAGACTA;
3	fimo	nucleotide_motif	4186968	4186974	36.5	+	.	Name=DARACWW_3:4186962-4186975(+)+;Alias=MEME-1;ID=DARACWW-MEME-1-1-3:4186962-4186975(+);pvalue=0.000224;qvalue=0.0467;sequence=AAGACTT;
3	fimo	nucleotide_motif	4186999	4187005	33	+	.	Name=DARACWW_3:4186992-4187005(+)+;Alias=MEME-1;ID=DARACWW-MEME-1-1-3:4186992-4187005(+);pvalue=0.0005;qvalue=0.0508;sequence=AAAACTT;
3	fimo	nucleotide_motif	4191517	4191523	23.3	-	.	Name=DARACWW_3:4191513-4191526(-)+;Alias=MEME-1;ID=DARACWW-MEME-1-1-3:4191513-4191526(-);pvalue=0.00471;qvalue=0.0905;sequence=GAAACAA;
3	fimo	nucleotide_motif	4219926	4219932	23.5	-	.	Name=DARACWW_3:4219922-4219935(-)+;Alias=MEME-1;ID=DARACWW-MEME-1-1-3:4219922-4219935(-);pvalue=0.00447;qvalue=0.0905;sequence=TGAACAT;
3	fimo	nucleotide_motif	4271090	4271096	28	+	.	Name=DARACWW_3:4271084-4271097(+)+;Alias=MEME-1;ID=DARACWW-MEME-1-1-3:4271084-4271097(+);pvalue=0.00159;qvalue=0.0732;sequence=GAAACAT;
3	fimo	nucleotide_motif	4271141	4271147	23.3	+	.	Name=DARACWW_3:4271135-4271148(+)+;Alias=MEME-1;ID=DARACWW-MEME-1-1-3:4271135-4271148(+);pvalue=0.00471;qvalue=0.0905;sequence=GAAACAA;
3	fimo	nucleotide_motif	4310044	4310050	22.2	+	.	Name=DARACWW_3:4310042-4310055(+)+;Alias=MEME-1;ID=DARACWW-MEME-1-1-3:4310042-4310055(+);pvalue=0.00599;qvalue=0.0965;sequence=TAGATTT;
3	fimo	nucleotide_motif	4362027	4362033	23	-	.	Name=DARACWW_3:4362023-4362036(-)+;Alias=MEME-1;ID=DARACWW-MEME-1-1-3:4362023-4362036(-);pvalue=0.00506;qvalue=0.0905;sequence=AAAACAA;
3	fimo	nucleotide_motif	4384843	4384849	30.5	-	.	Name=DARACWW_3:4384841-4384854(-)+;Alias=MEME-1;ID=DARACWW-MEME-1-1-3:4384841-4384854(-);pvalue=0.000882;qvalue=0.0619;sequence=CAGACTT;
3	fimo	nucleotide_motif	4395856	4395862	23	-	.	Name=DARACWW_3:4395852-4395865(-)+;Alias=MEME-1;ID=DARACWW-MEME-1-1-3:4395852-4395865(-);pvalue=0.00506;qvalue=0.0905;sequence=AAAACAA;
3	fimo	nucleotide_motif	4429460	4429466	22.1	-	.	Name=DARACWW_3:4429454-4429467(-)+;Alias=MEME-1;ID=DARACWW-MEME-1-1-3:4429454-4429467(-);pvalue=0.00612;qvalue=0.0968;sequence=TAGACAG;
3	fimo	nucleotide_motif	4435163	4435169	33	+	.	Name=DARACWW_3:4435159-4435172(+)+;Alias=MEME-1;ID=DARACWW-MEME-1-1-3:4435159-4435172(+);pvalue=0.0005;qvalue=0.0508;sequence=AAAACTT;
3	fimo	nucleotide_motif	4435204	4435210	28.2	+	.	Name=DARACWW_3:4435199-4435213(+)+;Alias=MEME-1;ID=DARACWW-MEME-1-1-3:4435199-4435213(+);pvalue=0.00151;qvalue=0.0732;sequence=TAAACAT;
3	fimo	nucleotide_motif	4473233	4473239	38.4	+	.	Name=DARACWW_3:4473229-4473242(+)+;Alias=MEME-1;ID=DARACWW-MEME-1-1-3:4473229-4473242(+);pvalue=0.000143;qvalue=0.0467;sequence=GAGACTT;
3	fimo	nucleotide_motif	4506182	4506188	28.2	+	.	Name=DARACWW_3:4506176-4506189(+)+;Alias=MEME-1;ID=DARACWW-MEME-1-1-3:4506176-4506189(+);pvalue=0.00151;qvalue=0.0732;sequence=TAAACAT;
3	fimo	nucleotide_motif	4516153	4516159	31.9	+	.	Name=DARACWW_3:4516149-4516162(+)+;Alias=MEME-1;ID=DARACWW-MEME-1-1-3:4516149-4516162(+);pvalue=0.000651;qvalue=0.0555;sequence=GAGACAT;
3	fimo	nucleotide_motif	4565533	4565539	26	-	.	Name=DARACWW_3:4565527-4565541(-)+;Alias=MEME-1;ID=DARACWW-MEME-1-1-3:4565527-4565541(-);pvalue=0.00252;qvalue=0.0778;sequence=AAAACTC;
3	fimo	nucleotide_motif	4565541	4565547	23	-	.	Name=DARACWW_3:4565537-4565550(-)+;Alias=MEME-1;ID=DARACWW-MEME-1-1-3:4565537-4565550(-);pvalue=0.00506;qvalue=0.0905;sequence=AAAACAA;
3	fimo	nucleotide_motif	4565565	4565571	30.9	-	.	Name=DARACWW_3:4565563-4565576(-)+;Alias=MEME-1;ID=DARACWW-MEME-1-1-3:4565563-4565576(-);pvalue=0.000818;qvalue=0.0606;sequence=TAGACTA;
3	fimo	nucleotide_motif	4676120	4676126	24.9	+	.	Name=DARACWW_3:4676113-4676127(+)+;Alias=MEME-1;ID=DARACWW-MEME-1-1-3:4676113-4676127(+);pvalue=0.00323;qvalue=0.0822;sequence=AAGACAA;
3	fimo	nucleotide_motif	4737268	4737274	21.8	-	.	Name=DARACWW_3:4737264-4737278(-)+;Alias=MEME-1;ID=DARACWW-MEME-1-1-3:4737264-4737278(-);pvalue=0.00665;qvalue=0.0986;sequence=AAGACAG;
3	fimo	nucleotide_motif	4820849	4820855	33	+	.	Name=DARACWW_3:4820842-4820855(+)+;Alias=MEME-1;ID=DARACWW-MEME-1-1-3:4820842-4820855(+);pvalue=0.0005;qvalue=0.0508;sequence=AAAACTT;
3	fimo	nucleotide_motif	4824008	4824014	36.5	+	.	Name=DARACWW_3:4824001-4824017(+)+;Alias=MEME-1;ID=DARACWW-MEME-1-1-3:4824001-4824017(+);pvalue=0.000224;qvalue=0.0467;sequence=AAGACTT;
3	fimo	nucleotide_motif	4910368	4910374	27.7	+	.	Name=DARACWW_3:4910366-4910379(+)+;Alias=MEME-1;ID=DARACWW-MEME-1-1-3:4910366-4910379(+);pvalue=0.0017;qvalue=0.0732;sequence=AAAACAT;
3	fimo	nucleotide_motif	4924219	4924225	23.3	+	.	Name=DARACWW_3:4924213-4924226(+)+;Alias=MEME-1;ID=DARACWW-MEME-1-1-3:4924213-4924226(+);pvalue=0.00471;qvalue=0.0905;sequence=GAAACAA;
3	fimo	nucleotide_motif	4924589	4924595	26	+	.	Name=DARACWW_3:4924585-4924598(+)+;Alias=MEME-1;ID=DARACWW-MEME-1-1-3:4924585-4924598(+);pvalue=0.00252;qvalue=0.0778;sequence=AAAACTC;
3	fimo	nucleotide_motif	4926917	4926923	26.7	+	.	Name=DARACWW_3:4926914-4926928(+)+;Alias=MEME-1;ID=DARACWW-MEME-1-1-3:4926914-4926928(+);pvalue=0.00212;qvalue=0.0766;sequence=TAAACTC;
3	fimo	nucleotide_motif	5022885	5022891	23.6	+	.	Name=DARACWW_3:5022878-5022893(+)+;Alias=MEME-1;ID=DARACWW-MEME-1-1-3:5022878-5022893(+);pvalue=0.00439;qvalue=0.0905;sequence=CAAACAT;
3	fimo	nucleotide_motif	5035947	5035953	26.7	-	.	Name=DARACWW_3:5035943-5035956(-)+;Alias=MEME-1;ID=DARACWW-MEME-1-1-3:5035943-5035956(-);pvalue=0.00212;qvalue=0.0766;sequence=GAAACTA;
3	fimo	nucleotide_motif	5035965	5035971	28.2	-	.	Name=DARACWW_3:5035961-5035974(-)+;Alias=MEME-1;ID=DARACWW-MEME-1-1-3:5035961-5035974(-);pvalue=0.00151;qvalue=0.0732;sequence=TAAACAT;
3	fimo	nucleotide_motif	5052208	5052214	36.5	+	.	Name=DARACWW_3:5052201-5052215(+)+;Alias=MEME-1;ID=DARACWW-MEME-1-1-3:5052201-5052215(+);pvalue=0.000224;qvalue=0.0467;sequence=AAGACTT;
3	fimo	nucleotide_motif	5052216	5052222	26	+	.	Name=DARACWW_3:5052212-5052227(+)+;Alias=MEME-1;ID=DARACWW-MEME-1-1-3:5052212-5052227(+);pvalue=0.00252;qvalue=0.0778;sequence=AAAACTC;
3	fimo	nucleotide_motif	5057969	5057975	24.3	+	.	Name=DARACWW_3:5057968-5057981(+)+;Alias=MEME-1;ID=DARACWW-MEME-1-2-3:5057968-5057981(+);pvalue=0.00367;qvalue=0.0857;sequence=TGGACTA;
3	fimo	nucleotide_motif	5057974	5057980	35	+	.	Name=DARACWW_3:5057968-5057981(+)+;Alias=MEME-1;ID=DARACWW-MEME-1-1-3:5057968-5057981(+);pvalue=0.000319;qvalue=0.0508;sequence=TAAACTT;
3	fimo	nucleotide_motif	5079030	5079036	41.1	+	.	Name=DARACWW_3:5079024-5079037(+)+;Alias=MEME-1;ID=DARACWW-MEME-1-1-3:5079024-5079037(+);pvalue=7.71e-05;qvalue=0.0467;sequence=TAGACTT;
3	fimo	nucleotide_motif	5117500	5117506	24.1	+	.	Name=DARACWW_3:5117494-5117507(+)+;Alias=MEME-1;ID=DARACWW-MEME-1-1-3:5117494-5117507(+);pvalue=0.00384;qvalue=0.0872;sequence=CAGACTC;
3	fimo	nucleotide_motif	5142626	5142632	33	+	.	Name=DARACWW_3:5142619-5142632(+)+;Alias=MEME-1;ID=DARACWW-MEME-1-1-3:5142619-5142632(+);pvalue=0.0005;qvalue=0.0508;sequence=AAAACTT;
3	fimo	nucleotide_motif	5201378	5201384	22.2	+	.	Name=DARACWW_3:5201374-5201387(+)+;Alias=MEME-1;ID=DARACWW-MEME-1-1-3:5201374-5201387(+);pvalue=0.00599;qvalue=0.0965;sequence=ATGACTT;
3	fimo	nucleotide_motif	5216621	5216627	23	-	.	Name=DARACWW_3:5216618-5216631(-)+;Alias=MEME-1;ID=DARACWW-MEME-1-1-3:5216618-5216631(-);pvalue=0.00506;qvalue=0.0905;sequence=AAAACTG;
3	fimo	nucleotide_motif	5249700	5249706	36.5	-	.	Name=DARACWW_3:5249698-5249712(-)+;Alias=MEME-1;ID=DARACWW-MEME-1-1-3:5249698-5249712(-);pvalue=0.000224;qvalue=0.0467;sequence=AAGACTT;
3	fimo	nucleotide_motif	5274006	5274012	31.3	-	.	Name=DARACWW_3:5274004-5274019(-)+;Alias=MEME-1;ID=DARACWW-MEME-1-1-3:5274004-5274019(-);pvalue=0.000737;qvalue=0.0566;sequence=AAGACAT;
3	fimo	nucleotide_motif	5274032	5274038	28.2	-	.	Name=DARACWW_3:5274028-5274042(-)+;Alias=MEME-1;ID=DARACWW-MEME-1-1-3:5274028-5274042(-);pvalue=0.00151;qvalue=0.0732;sequence=TAAACAT;
3	fimo	nucleotide_motif	5301451	5301457	23	+	.	Name=DARACWW_3:5301444-5301457(+)+;Alias=MEME-1;ID=DARACWW-MEME-1-1-3:5301444-5301457(+);pvalue=0.00506;qvalue=0.0905;sequence=AAAACAA;
3	fimo	nucleotide_motif	5301514	5301520	28.5	+	.	Name=DARACWW_3:5301507-5301521(+)+;Alias=MEME-1;ID=DARACWW-MEME-1-1-3:5301507-5301521(+);pvalue=0.00141;qvalue=0.0732;sequence=AAGACTC;
3	fimo	nucleotide_motif	5307995	5308001	33	-	.	Name=DARACWW_3:5307988-5308001(-)+;Alias=MEME-1;ID=DARACWW-MEME-1-1-3:5307988-5308001(-);pvalue=0.0005;qvalue=0.0508;sequence=AAAACTT;
3	fimo	nucleotide_motif	5319496	5319502	34	+	.	Name=DARACWW_3:5319490-5319503(+)+;Alias=MEME-1;ID=DARACWW-MEME-1-1-3:5319490-5319503(+);pvalue=0.0004;qvalue=0.0508;sequence=GAAACTT;
3	fimo	nucleotide_motif	5319549	5319555	28.5	+	.	Name=DARACWW_3:5319542-5319556(+)+;Alias=MEME-1;ID=DARACWW-MEME-1-1-3:5319542-5319556(+);pvalue=0.00141;qvalue=0.0732;sequence=AAGACTC;
3	fimo	nucleotide_motif	5333543	5333549	33	+	.	Name=DARACWW_3:5333536-5333549(+)+;Alias=MEME-1;ID=DARACWW-MEME-1-1-3:5333536-5333549(+);pvalue=0.0005;qvalue=0.0508;sequence=AAAACTT;
3	fimo	nucleotide_motif	5333690	5333696	30.2	+	.	Name=DARACWW_3:5333683-5333700(+)+;Alias=MEME-1;ID=DARACWW-MEME-1-1-3:5333683-5333700(+);pvalue=0.000945;qvalue=0.0635;sequence=TGGACTT;
3	fimo	nucleotide_motif	5342409	5342415	36.5	+	.	Name=DARACWW_3:5342402-5342416(+)+;Alias=MEME-1;ID=DARACWW-MEME-1-1-3:5342402-5342416(+);pvalue=0.000224;qvalue=0.0467;sequence=AAGACTT;
3	fimo	nucleotide_motif	5342493	5342499	23.3	+	.	Name=DARACWW_3:5342487-5342500(+)+;Alias=MEME-1;ID=DARACWW-MEME-1-1-3:5342487-5342500(+);pvalue=0.00471;qvalue=0.0905;sequence=GAAACAA;
3	fimo	nucleotide_motif	5353554	5353560	28.5	+	.	Name=DARACWW_3:5353548-5353561(+)+;Alias=MEME-1;ID=DARACWW-MEME-1-1-3:5353548-5353561(+);pvalue=0.00141;qvalue=0.0732;sequence=AAGACTC;
3	fimo	nucleotide_motif	5356777	5356783	21.9	-	.	Name=DARACWW_3:5356771-5356784(-)+;Alias=MEME-1;ID=DARACWW-MEME-1-1-3:5356771-5356784(-);pvalue=0.00642;qvalue=0.0978;sequence=AGAACTA;
3	fimo	nucleotide_motif	5397692	5397698	38.4	-	.	Name=DARACWW_3:5397690-5397703(-)+;Alias=MEME-1;ID=DARACWW-MEME-1-1-3:5397690-5397703(-);pvalue=0.000143;qvalue=0.0467;sequence=GAGACTT;
3	fimo	nucleotide_motif	5430965	5430971	23	-	.	Name=DARACWW_3:5430961-5430976(-)+;Alias=MEME-1;ID=DARACWW-MEME-1-1-3:5430961-5430976(-);pvalue=0.00506;qvalue=0.0905;sequence=TAAACCT;
3	fimo	nucleotide_motif	5468629	5468635	26	-	.	Name=DARACWW_3:5468623-5468637(-)+;Alias=MEME-1;ID=DARACWW-MEME-1-1-3:5468623-5468637(-);pvalue=0.00252;qvalue=0.0778;sequence=AAAACTC;
3	fimo	nucleotide_motif	5669440	5669446	26.7	-	.	Name=DARACWW_3:5669436-5669449(-)+;Alias=MEME-1;ID=DARACWW-MEME-1-1-3:5669436-5669449(-);pvalue=0.00212;qvalue=0.0766;sequence=TAAACTC;
3	fimo	nucleotide_motif	5802579	5802585	24.1	-	.	Name=DARACWW_3:5802577-5802590(-)+;Alias=MEME-1;ID=DARACWW-MEME-1-1-3:5802577-5802590(-);pvalue=0.00384;qvalue=0.0872;sequence=CAGACTC;
3	fimo	nucleotide_motif	5802607	5802613	23.7	-	.	Name=DARACWW_3:5802598-5802618(-)+;Alias=MEME-1;ID=DARACWW-MEME-1-1-3:5802598-5802618(-);pvalue=0.00431;qvalue=0.0905;sequence=TAAACAA;
3	fimo	nucleotide_motif	5829372	5829378	22.2	+	.	Name=DARACWW_3:5829365-5829378(+)+;Alias=MEME-1;ID=DARACWW-MEME-1-1-3:5829365-5829378(+);pvalue=0.00599;qvalue=0.0965;sequence=ATGACTT;
3	fimo	nucleotide_motif	5829432	5829438	23	+	.	Name=DARACWW_3:5829425-5829438(+)+;Alias=MEME-1;ID=DARACWW-MEME-1-1-3:5829425-5829438(+);pvalue=0.00506;qvalue=0.0905;sequence=AAAACAA;
3	fimo	nucleotide_motif	5883104	5883110	24.1	+	.	Name=DARACWW_3:5883098-5883111(+)+;Alias=MEME-1;ID=DARACWW-MEME-1-1-3:5883098-5883111(+);pvalue=0.00384;qvalue=0.0872;sequence=CAGACTC;
3	fimo	nucleotide_motif	5968984	5968990	32.3	+	.	Name=DARACWW_3:5968978-5968991(+)+;Alias=MEME-1;ID=DARACWW-MEME-1-1-3:5968978-5968991(+);pvalue=0.000582;qvalue=0.0548;sequence=TAGACAT;
3	fimo	nucleotide_motif	5989118	5989124	21.9	-	.	Name=DARACWW_3:5989113-5989126(-)+;Alias=MEME-1;ID=DARACWW-MEME-1-1-3:5989113-5989126(-);pvalue=0.00642;qvalue=0.0978;sequence=GAGATTT;
3	fimo	nucleotide_motif	6078496	6078502	25.6	+	.	Name=DARACWW_3:6078490-6078503(+)+;Alias=MEME-1;ID=DARACWW-MEME-1-1-3:6078490-6078503(+);pvalue=0.00274;qvalue=0.0794;sequence=CAGACAT;
3	fimo	nucleotide_motif	6091242	6091248	27.7	-	.	Name=DARACWW_3:6091239-6091252(-)+;Alias=MEME-1;ID=DARACWW-MEME-1-1-3:6091239-6091252(-);pvalue=0.0017;qvalue=0.0732;sequence=AAAACAT;
3	fimo	nucleotide_motif	6186787	6186793	36.5	+	.	Name=DARACWW_3:6186780-6186794(+)+;Alias=MEME-1;ID=DARACWW-MEME-1-1-3:6186780-6186794(+);pvalue=0.000224;qvalue=0.0467;sequence=AAGACTT;
3	fimo	nucleotide_motif	6186971	6186977	23.3	+	.	Name=DARACWW_3:6186965-6186978(+)+;Alias=MEME-1;ID=DARACWW-MEME-1-1-3:6186965-6186978(+);pvalue=0.00471;qvalue=0.0905;sequence=GAAACTG;
3	fimo	nucleotide_motif	6212674	6212680	26.7	-	.	Name=DARACWW_3:6212670-6212683(-)+;Alias=MEME-1;ID=DARACWW-MEME-1-1-3:6212670-6212683(-);pvalue=0.00212;qvalue=0.0766;sequence=TAAACTC;
3	fimo	nucleotide_motif	6212704	6212710	22.8	-	.	Name=DARACWW_3:6212698-6212711(-)+;Alias=MEME-1;ID=DARACWW-MEME-1-1-3:6212698-6212711(-);pvalue=0.0053;qvalue=0.093;sequence=CAAACTA;
3	fimo	nucleotide_motif	6212738	6212744	22.2	-	.	Name=DARACWW_3:6212734-6212747(-)+;Alias=MEME-1;ID=DARACWW-MEME-1-1-3:6212734-6212747(-);pvalue=0.00599;qvalue=0.0965;sequence=AAAACCT;
3	fimo	nucleotide_motif	6234021	6234027	22.5	+	.	Name=DARACWW_3:6234017-6234031(+)+;Alias=MEME-1;ID=DARACWW-MEME-1-1-3:6234017-6234031(+);pvalue=0.00567;qvalue=0.0952;sequence=GTGACTT;
3	fimo	nucleotide_motif	6238080	6238086	24.1	-	.	Name=DARACWW_3:6238078-6238091(-)+;Alias=MEME-1;ID=DARACWW-MEME-1-1-3:6238078-6238091(-);pvalue=0.00384;qvalue=0.0872;sequence=CAGACTC;
3	fimo	nucleotide_motif	6280308	6280314	21.9	+	.	Name=DARACWW_3:6280305-6280318(+)+;Alias=MEME-1;ID=DARACWW-MEME-1-1-3:6280305-6280318(+);pvalue=0.00652;qvalue=0.0978;sequence=AAGATTT;
3	fimo	nucleotide_motif	6310533	6310539	23	+	.	Name=DARACWW_3:6310526-6310539(+)+;Alias=MEME-1;ID=DARACWW-MEME-1-1-3:6310526-6310539(+);pvalue=0.00506;qvalue=0.0905;sequence=AAAACTG;
3	fimo	nucleotide_motif	6324659	6324665	26.1	-	.	Name=DARACWW_3:6324655-6324668(-)+;Alias=MEME-1;ID=DARACWW-MEME-1-1-3:6324655-6324668(-);pvalue=0.00244;qvalue=0.0778;sequence=GAAACTC;
3	fimo	nucleotide_motif	6324667	6324673	27.1	-	.	Name=DARACWW_3:6324661-6324674(-)+;Alias=MEME-1;ID=DARACWW-MEME-1-1-3:6324661-6324674(-);pvalue=0.00195;qvalue=0.0766;sequence=TGAACTT;
3	fimo	nucleotide_motif	6330706	6330712	23.7	+	.	Name=DARACWW_3:6330700-6330713(+)+;Alias=MEME-1;ID=DARACWW-MEME-1-1-3:6330700-6330713(+);pvalue=0.00431;qvalue=0.0905;sequence=TAAACTG;
3	fimo	nucleotide_motif	6330721	6330727	26.5	+	.	Name=DARACWW_3:6330714-6330727(+)+;Alias=MEME-1;ID=DARACWW-MEME-1-1-3:6330714-6330727(+);pvalue=0.00222;qvalue=0.0769;sequence=AAAACTA;
3	fimo	nucleotide_motif	6453932	6453938	36.5	+	.	Name=DARACWW_3:6453922-6453939(+)+;Alias=MEME-1;ID=DARACWW-MEME-1-1-3:6453922-6453939(+);pvalue=0.000224;qvalue=0.0467;sequence=AAGACTT;
3	fimo	nucleotide_motif	6476971	6476977	22.1	+	.	Name=DARACWW_3:6476965-6476978(+)+;Alias=MEME-1;ID=DARACWW-MEME-1-1-3:6476965-6476978(+);pvalue=0.00612;qvalue=0.0968;sequence=CAAACTC;
3	fimo	nucleotide_motif	6477111	6477117	26	+	.	Name=DARACWW_3:6477104-6477117(+)+;Alias=MEME-1;ID=DARACWW-MEME-1-1-3:6477104-6477117(+);pvalue=0.00252;qvalue=0.0778;sequence=AAAACTC;
3	fimo	nucleotide_motif	6477124	6477130	22.2	+	.	Name=DARACWW_3:6477118-6477131(+)+;Alias=MEME-1;ID=DARACWW-MEME-1-1-3:6477118-6477131(+);pvalue=0.00599;qvalue=0.0965;sequence=AAAACCT;
3	fimo	nucleotide_motif	6477132	6477138	26.1	+	.	Name=DARACWW_3:6477126-6477139(+)+;Alias=MEME-1;ID=DARACWW-MEME-1-1-3:6477126-6477139(+);pvalue=0.00244;qvalue=0.0778;sequence=GAAACTC;
3	fimo	nucleotide_motif	6486149	6486155	21.9	+	.	Name=DARACWW_3:6486146-6486159(+)+;Alias=MEME-1;ID=DARACWW-MEME-1-1-3:6486146-6486159(+);pvalue=0.00642;qvalue=0.0978;sequence=GAGATTT;
3	fimo	nucleotide_motif	6549003	6549009	23	-	.	Name=DARACWW_3:6548996-6549009(-)+;Alias=MEME-1;ID=DARACWW-MEME-1-1-3:6548996-6549009(-);pvalue=0.00506;qvalue=0.0905;sequence=AAAACAA;
3	fimo	nucleotide_motif	6553645	6553651	23	-	.	Name=DARACWW_3:6553641-6553655(-)+;Alias=MEME-1;ID=DARACWW-MEME-1-1-3:6553641-6553655(-);pvalue=0.00506;qvalue=0.0905;sequence=TAAACCT;
3	fimo	nucleotide_motif	6556237	6556243	29.1	-	.	Name=DARACWW_3:6556233-6556246(-)+;Alias=MEME-1;ID=DARACWW-MEME-1-1-3:6556233-6556246(-);pvalue=0.00122;qvalue=0.0702;sequence=GGGACTT;
3	fimo	nucleotide_motif	6611244	6611250	24.7	-	.	Name=DARACWW_3:6611242-6611255(-)+;Alias=MEME-1;ID=DARACWW-MEME-1-1-3:6611242-6611255(-);pvalue=0.00342;qvalue=0.0846;sequence=CAGACTA;
3	fimo	nucleotide_motif	6611294	6611300	41.1	-	.	Name=DARACWW_3:6611292-6611305(-)+;Alias=MEME-1;ID=DARACWW-MEME-1-1-3:6611292-6611305(-);pvalue=7.71e-05;qvalue=0.0467;sequence=TAGACTT;
3	fimo	nucleotide_motif	6690018	6690024	31.3	+	.	Name=DARACWW_3:6690014-6690027(+)+;Alias=MEME-1;ID=DARACWW-MEME-1-1-3:6690014-6690027(+);pvalue=0.000737;qvalue=0.0566;sequence=AAGACAT;
3	fimo	nucleotide_motif	6754681	6754687	26	+	.	Name=DARACWW_3:6754678-6754692(+)+;Alias=MEME-1;ID=DARACWW-MEME-1-1-3:6754678-6754692(+);pvalue=0.00252;qvalue=0.0778;sequence=AAAACTC;
3	fimo	nucleotide_motif	6754750	6754756	23.3	+	.	Name=DARACWW_3:6754744-6754757(+)+;Alias=MEME-1;ID=DARACWW-MEME-1-1-3:6754744-6754757(+);pvalue=0.00471;qvalue=0.0905;sequence=GAAACAA;
3	fimo	nucleotide_motif	6818647	6818653	25.6	-	.	Name=DARACWW_3:6818645-6818658(-)+;Alias=MEME-1;ID=DARACWW-MEME-1-1-3:6818645-6818658(-);pvalue=0.00274;qvalue=0.0794;sequence=CAGACAT;
3	fimo	nucleotide_motif	6823170	6823176	36.5	+	.	Name=DARACWW_3:6823164-6823177(+)+;Alias=MEME-1;ID=DARACWW-MEME-1-1-3:6823164-6823177(+);pvalue=0.000224;qvalue=0.0467;sequence=AAGACTT;
3	fimo	nucleotide_motif	6850496	6850502	27.7	-	.	Name=DARACWW_3:6850493-6850506(-)+;Alias=MEME-1;ID=DARACWW-MEME-1-1-3:6850493-6850506(-);pvalue=0.0017;qvalue=0.0732;sequence=AAAACAT;
3	fimo	nucleotide_motif	6850545	6850551	23.3	-	.	Name=DARACWW_3:6850541-6850554(-)+;Alias=MEME-1;ID=DARACWW-MEME-1-1-3:6850541-6850554(-);pvalue=0.00471;qvalue=0.0905;sequence=GAAACAA;
3	fimo	nucleotide_motif	6866377	6866383	27.3	+	.	Name=DARACWW_3:6866375-6866391(+)+;Alias=MEME-1;ID=DARACWW-MEME-1-1-3:6866375-6866391(+);pvalue=0.00188;qvalue=0.0756;sequence=CAAACTT;
3	fimo	nucleotide_motif	6866383	6866389	26.7	+	.	Name=DARACWW_3:6866375-6866391(+)+;Alias=MEME-1;ID=DARACWW-MEME-1-2-3:6866375-6866391(+);pvalue=0.00212;qvalue=0.0766;sequence=TAAACTC;
3	fimo	nucleotide_motif	6866408	6866414	22.2	+	.	Name=DARACWW_3:6866404-6866419(+)+;Alias=MEME-1;ID=DARACWW-MEME-1-1-3:6866404-6866419(+);pvalue=0.00599;qvalue=0.0965;sequence=ATGACTT;
3	fimo	nucleotide_motif	6866504	6866510	26	+	.	Name=DARACWW_3:6866502-6866515(+)+;Alias=MEME-1;ID=DARACWW-MEME-1-1-3:6866502-6866515(+);pvalue=0.00252;qvalue=0.0778;sequence=AAAACTC;
3	fimo	nucleotide_motif	6866529	6866535	36.5	+	.	Name=DARACWW_3:6866522-6866536(+)+;Alias=MEME-1;ID=DARACWW-MEME-1-1-3:6866522-6866536(+);pvalue=0.000224;qvalue=0.0467;sequence=AAGACTT;
3	fimo	nucleotide_motif	6877565	6877571	22.5	+	.	Name=DARACWW_3:6877558-6877572(+)+;Alias=MEME-1;ID=DARACWW-MEME-1-1-3:6877558-6877572(+);pvalue=0.00567;qvalue=0.0952;sequence=AAAACAC;
3	fimo	nucleotide_motif	6877752	6877758	26.7	-	.	Name=DARACWW_3:6877748-6877761(-)+;Alias=MEME-1;ID=DARACWW-MEME-1-1-3:6877748-6877761(-);pvalue=0.00212;qvalue=0.0766;sequence=TAAACTC;
3	fimo	nucleotide_motif	6879725	6879731	28.5	-	.	Name=DARACWW_3:6879721-6879734(-)+;Alias=MEME-1;ID=DARACWW-MEME-1-1-3:6879721-6879734(-);pvalue=0.00141;qvalue=0.0732;sequence=AAGACTC;
3	fimo	nucleotide_motif	6906049	6906055	26	+	.	Name=DARACWW_3:6906047-6906061(+)+;Alias=MEME-1;ID=DARACWW-MEME-1-1-3:6906047-6906061(+);pvalue=0.00252;qvalue=0.0778;sequence=AAAACTC;
3	fimo	nucleotide_motif	6922673	6922679	25.2	-	.	Name=DARACWW_3:6922667-6922680(-)+;Alias=MEME-1;ID=DARACWW-MEME-1-1-3:6922667-6922680(-);pvalue=0.003;qvalue=0.0822;sequence=TAGACAC;
3	fimo	nucleotide_motif	6929405	6929411	23.7	+	.	Name=DARACWW_3:6929399-6929412(+)+;Alias=MEME-1;ID=DARACWW-MEME-1-1-3:6929399-6929412(+);pvalue=0.00431;qvalue=0.0905;sequence=TAAACAA;
3	fimo	nucleotide_motif	7055393	7055399	31.3	-	.	Name=DARACWW_3:7055391-7055404(-)+;Alias=MEME-1;ID=DARACWW-MEME-1-1-3:7055391-7055404(-);pvalue=0.000737;qvalue=0.0566;sequence=AAGACAT;
3	fimo	nucleotide_motif	7055660	7055666	22.9	-	.	Name=DARACWW_3:7055657-7055670(-)+;Alias=MEME-1;ID=DARACWW-MEME-1-1-3:7055657-7055670(-);pvalue=0.00513;qvalue=0.0914;sequence=GGAACAT;
3	fimo	nucleotide_motif	7074977	7074983	22.5	-	.	Name=DARACWW_3:7074973-7074986(-)+;Alias=MEME-1;ID=DARACWW-MEME-1-1-3:7074973-7074986(-);pvalue=0.00567;qvalue=0.0952;sequence=GTGACTT;
3	fimo	nucleotide_motif	7110172	7110178	23	-	.	Name=DARACWW_3:7110168-7110181(-)+;Alias=MEME-1;ID=DARACWW-MEME-1-1-3:7110168-7110181(-);pvalue=0.00506;qvalue=0.0905;sequence=AAAACAA;
3	fimo	nucleotide_motif	7248896	7248902	21.9	-	.	Name=DARACWW_3:7248891-7248904(-)+;Alias=MEME-1;ID=DARACWW-MEME-1-1-3:7248891-7248904(-);pvalue=0.00642;qvalue=0.0978;sequence=GAGATTT;
3	fimo	nucleotide_motif	7260564	7260570	26	-	.	Name=DARACWW_3:7260558-7260571(-)+;Alias=MEME-1;ID=DARACWW-MEME-1-1-3:7260558-7260571(-);pvalue=0.00252;qvalue=0.0778;sequence=AAAACTC;
3	fimo	nucleotide_motif	7271124	7271130	29.7	+	.	Name=DARACWW_3:7271118-7271131(+)+;Alias=MEME-1;ID=DARACWW-MEME-1-1-3:7271118-7271131(+);pvalue=0.00108;qvalue=0.0664;sequence=TAGACTC;
3	fimo	nucleotide_motif	7282058	7282064	31.9	+	.	Name=DARACWW_3:7282054-7282067(+)+;Alias=MEME-1;ID=DARACWW-MEME-1-1-3:7282054-7282067(+);pvalue=0.000651;qvalue=0.0555;sequence=GAGACAT;
3	fimo	nucleotide_motif	7309395	7309401	23.7	-	.	Name=DARACWW_3:7309391-7309404(-)+;Alias=MEME-1;ID=DARACWW-MEME-1-1-3:7309391-7309404(-);pvalue=0.00431;qvalue=0.0905;sequence=TAAACAA;
3	fimo	nucleotide_motif	7328665	7328671	21.9	-	.	Name=DARACWW_3:7328660-7328673(-)+;Alias=MEME-1;ID=DARACWW-MEME-1-1-3:7328660-7328673(-);pvalue=0.00652;qvalue=0.0978;sequence=AAGATTT;
3	fimo	nucleotide_motif	7350213	7350219	23	+	.	Name=DARACWW_3:7350209-7350222(+)+;Alias=MEME-1;ID=DARACWW-MEME-1-1-3:7350209-7350222(+);pvalue=0.00506;qvalue=0.0905;sequence=TTGACTT;
3	fimo	nucleotide_motif	7402591	7402597	24.9	-	.	Name=DARACWW_3:7402584-7402597(-)+;Alias=MEME-1;ID=DARACWW-MEME-1-1-3:7402584-7402597(-);pvalue=0.00323;qvalue=0.0822;sequence=AAGACAA;
3	fimo	nucleotide_motif	7437854	7437860	22.2	+	.	Name=DARACWW_3:7437846-7437860(+)+;Alias=MEME-1;ID=DARACWW-MEME-1-1-3:7437846-7437860(+);pvalue=0.00599;qvalue=0.0965;sequence=ATGACTT;
3	fimo	nucleotide_motif	7493498	7493504	25.7	-	.	Name=DARACWW_3:7493496-7493509(-)+;Alias=MEME-1;ID=DARACWW-MEME-1-1-3:7493496-7493509(-);pvalue=0.00267;qvalue=0.0794;sequence=TAGACAA;
3	fimo	nucleotide_motif	7641974	7641980	35	+	.	Name=DARACWW_3:7641969-7641982(+)+;Alias=MEME-1;ID=DARACWW-MEME-1-1-3:7641969-7641982(+);pvalue=0.000319;qvalue=0.0508;sequence=TAAACTT;
3	fimo	nucleotide_motif	7701074	7701080	23.7	-	.	Name=DARACWW_3:7701070-7701083(-)+;Alias=MEME-1;ID=DARACWW-MEME-1-1-3:7701070-7701083(-);pvalue=0.00431;qvalue=0.0905;sequence=TAAACAA;
3	fimo	nucleotide_motif	7701218	7701224	34	-	.	Name=DARACWW_3:7701214-7701227(-)+;Alias=MEME-1;ID=DARACWW-MEME-1-1-3:7701214-7701227(-);pvalue=0.0004;qvalue=0.0508;sequence=GAAACTT;
3	fimo	nucleotide_motif	7701225	7701231	34	-	.	Name=DARACWW_3:7701221-7701234(-)+;Alias=MEME-1;ID=DARACWW-MEME-1-1-3:7701221-7701234(-);pvalue=0.0004;qvalue=0.0508;sequence=GAAACTT;
3	fimo	nucleotide_motif	7792698	7792704	26.7	-	.	Name=DARACWW_3:7792694-7792707(-)+;Alias=MEME-1;ID=DARACWW-MEME-1-1-3:7792694-7792707(-);pvalue=0.00212;qvalue=0.0766;sequence=GAAACTA;
3	fimo	nucleotide_motif	7792724	7792730	27.1	-	.	Name=DARACWW_3:7792718-7792731(-)+;Alias=MEME-1;ID=DARACWW-MEME-1-1-3:7792718-7792731(-);pvalue=0.00195;qvalue=0.0766;sequence=TGAACTT;
3	fimo	nucleotide_motif	7838981	7838987	23.7	+	.	Name=DARACWW_3:7838975-7838988(+)+;Alias=MEME-1;ID=DARACWW-MEME-1-1-3:7838975-7838988(+);pvalue=0.00431;qvalue=0.0905;sequence=TAAACAA;
3	fimo	nucleotide_motif	7844056	7844062	24.2	-	.	Name=DARACWW_3:7844051-7844068(-)+;Alias=MEME-1;ID=DARACWW-MEME-1-1-3:7844051-7844068(-);pvalue=0.00379;qvalue=0.0872;sequence=AAGACCT;
3	fimo	nucleotide_motif	7885475	7885481	27.4	+	.	Name=DARACWW_3:7885469-7885482(+)+;Alias=MEME-1;ID=DARACWW-MEME-1-1-3:7885469-7885482(+);pvalue=0.0018;qvalue=0.0746;sequence=TAAACTA;
3	fimo	nucleotide_motif	7890984	7890990	28	-	.	Name=DARACWW_3:7890980-7890993(-)+;Alias=MEME-1;ID=DARACWW-MEME-1-1-3:7890980-7890993(-);pvalue=0.00159;qvalue=0.0732;sequence=GAAACAT;
3	fimo	nucleotide_motif	7895281	7895287	23	+	.	Name=DARACWW_3:7895274-7895288(+)+;Alias=MEME-1;ID=DARACWW-MEME-1-1-3:7895274-7895288(+);pvalue=0.00506;qvalue=0.0905;sequence=AAAACAA;
3	fimo	nucleotide_motif	7918911	7918917	28.5	+	.	Name=DARACWW_3:7918907-7918920(+)+;Alias=MEME-1;ID=DARACWW-MEME-1-1-3:7918907-7918920(+);pvalue=0.00141;qvalue=0.0732;sequence=AAGACTC;
3	fimo	nucleotide_motif	7919156	7919162	22.2	+	.	Name=DARACWW_3:7919152-7919165(+)+;Alias=MEME-1;ID=DARACWW-MEME-1-1-3:7919152-7919165(+);pvalue=0.00599;qvalue=0.0965;sequence=AAAACCT;
3	fimo	nucleotide_motif	7953077	7953083	23	+	.	Name=DARACWW_3:7953072-7953085(+)+;Alias=MEME-1;ID=DARACWW-MEME-1-1-3:7953072-7953085(+);pvalue=0.00506;qvalue=0.0905;sequence=TAAACCT;
3	fimo	nucleotide_motif	7962101	7962107	23	+	.	Name=DARACWW_3:7962094-7962107(+)+;Alias=MEME-1;ID=DARACWW-MEME-1-1-3:7962094-7962107(+);pvalue=0.00506;qvalue=0.0905;sequence=AAAACAA;
3	fimo	nucleotide_motif	7962106	7962112	26	+	.	Name=DARACWW_3:7962102-7962115(+)+;Alias=MEME-1;ID=DARACWW-MEME-1-1-3:7962102-7962115(+);pvalue=0.00252;qvalue=0.0778;sequence=AAAACTC;
3	fimo	nucleotide_motif	7977502	7977508	41.1	+	.	Name=DARACWW_3:7977496-7977509(+)+;Alias=MEME-1;ID=DARACWW-MEME-1-1-3:7977496-7977509(+);pvalue=7.71e-05;qvalue=0.0467;sequence=TAGACTT;
3	fimo	nucleotide_motif	7977544	7977550	26.7	+	.	Name=DARACWW_3:7977538-7977551(+)+;Alias=MEME-1;ID=DARACWW-MEME-1-1-3:7977538-7977551(+);pvalue=0.00212;qvalue=0.0766;sequence=GAAACTA;
3	fimo	nucleotide_motif	8088608	8088614	22.5	+	.	Name=DARACWW_3:8088604-8088617(+)+;Alias=MEME-1;ID=DARACWW-MEME-1-1-3:8088604-8088617(+);pvalue=0.00567;qvalue=0.0952;sequence=AAAACAC;
3	fimo	nucleotide_motif	8088657	8088663	36.5	+	.	Name=DARACWW_3:8088655-8088670(+)+;Alias=MEME-1;ID=DARACWW-MEME-1-1-3:8088655-8088670(+);pvalue=0.000224;qvalue=0.0467;sequence=AAGACTT;
3	fimo	nucleotide_motif	8114866	8114872	24.9	+	.	Name=DARACWW_3:8114860-8114873(+)+;Alias=MEME-1;ID=DARACWW-MEME-1-1-3:8114860-8114873(+);pvalue=0.00323;qvalue=0.0822;sequence=AAGACTG;
3	fimo	nucleotide_motif	8141841	8141847	30.9	+	.	Name=DARACWW_3:8141835-8141848(+)+;Alias=MEME-1;ID=DARACWW-MEME-1-1-3:8141835-8141848(+);pvalue=0.000818;qvalue=0.0606;sequence=TAGACTA;
3	fimo	nucleotide_motif	8196906	8196912	34	+	.	Name=DARACWW_3:8196900-8196913(+)+;Alias=MEME-1;ID=DARACWW-MEME-1-1-3:8196900-8196913(+);pvalue=0.0004;qvalue=0.0508;sequence=GAAACTT;
3	fimo	nucleotide_motif	8207439	8207445	23.6	-	.	Name=DARACWW_3:8207435-8207448(-)+;Alias=MEME-1;ID=DARACWW-MEME-1-1-3:8207435-8207448(-);pvalue=0.00439;qvalue=0.0905;sequence=CAAACAT;
3	fimo	nucleotide_motif	8207542	8207548	22.7	-	.	Name=DARACWW_3:8207538-8207551(-)+;Alias=MEME-1;ID=DARACWW-MEME-1-1-3:8207538-8207551(-);pvalue=0.00537;qvalue=0.0935;sequence=GAAACAC;
3	fimo	nucleotide_motif	8324153	8324159	22.5	+	.	Name=DARACWW_3:8324148-8324161(+)+;Alias=MEME-1;ID=DARACWW-MEME-1-1-3:8324148-8324161(+);pvalue=0.00567;qvalue=0.0952;sequence=TGAACTA;
3	fimo	nucleotide_motif	8324162	8324168	26.7	+	.	Name=DARACWW_3:8324156-8324169(+)+;Alias=MEME-1;ID=DARACWW-MEME-1-1-3:8324156-8324169(+);pvalue=0.00212;qvalue=0.0766;sequence=GAAACTA;
3	fimo	nucleotide_motif	8324225	8324231	23	+	.	Name=DARACWW_3:8324218-8324231(+)+;Alias=MEME-1;ID=DARACWW-MEME-1-1-3:8324218-8324231(+);pvalue=0.00506;qvalue=0.0905;sequence=AAAACAA;
3	fimo	nucleotide_motif	8336130	8336136	26.7	+	.	Name=DARACWW_3:8336126-8336139(+)+;Alias=MEME-1;ID=DARACWW-MEME-1-1-3:8336126-8336139(+);pvalue=0.00212;qvalue=0.0766;sequence=TAAACTC;
3	fimo	nucleotide_motif	8346999	8347005	28.2	+	.	Name=DARACWW_3:8346993-8347006(+)+;Alias=MEME-1;ID=DARACWW-MEME-1-1-3:8346993-8347006(+);pvalue=0.00151;qvalue=0.0732;sequence=TAAACAT;
3	fimo	nucleotide_motif	8423083	8423089	22.2	-	.	Name=DARACWW_3:8423079-8423093(-)+;Alias=MEME-1;ID=DARACWW-MEME-1-1-3:8423079-8423093(-);pvalue=0.00599;qvalue=0.0965;sequence=AAAACCT;
3	fimo	nucleotide_motif	8423092	8423098	33	-	.	Name=DARACWW_3:8423088-8423101(-)+;Alias=MEME-1;ID=DARACWW-MEME-1-1-3:8423088-8423101(-);pvalue=0.0005;qvalue=0.0508;sequence=AAAACTT;
3	fimo	nucleotide_motif	8423097	8423103	23.7	-	.	Name=DARACWW_3:8423093-8423106(-)+;Alias=MEME-1;ID=DARACWW-MEME-1-1-3:8423093-8423106(-);pvalue=0.00431;qvalue=0.0905;sequence=TAAACAA;
3	fimo	nucleotide_motif	8442724	8442730	21.9	+	.	Name=DARACWW_3:8442720-8442733(+)+;Alias=MEME-1;ID=DARACWW-MEME-1-1-3:8442720-8442733(+);pvalue=0.00642;qvalue=0.0978;sequence=GAGATTT;
3	fimo	nucleotide_motif	8457885	8457891	28	-	.	Name=DARACWW_3:8457881-8457894(-)+;Alias=MEME-1;ID=DARACWW-MEME-1-1-3:8457881-8457894(-);pvalue=0.00159;qvalue=0.0732;sequence=GAAACAT;
3	fimo	nucleotide_motif	8475718	8475724	25.2	+	.	Name=DARACWW_3:8475713-8475727(+)+;Alias=MEME-1;ID=DARACWW-MEME-1-1-3:8475713-8475727(+);pvalue=0.003;qvalue=0.0822;sequence=GAGACAA;
3	fimo	nucleotide_motif	8475728	8475734	26	+	.	Name=DARACWW_3:8475724-8475737(+)+;Alias=MEME-1;ID=DARACWW-MEME-1-1-3:8475724-8475737(+);pvalue=0.00252;qvalue=0.0778;sequence=AAAACTC;
3	fimo	nucleotide_motif	8531595	8531601	29.7	-	.	Name=DARACWW_3:8531589-8531602(-)+;Alias=MEME-1;ID=DARACWW-MEME-1-1-3:8531589-8531602(-);pvalue=0.00108;qvalue=0.0664;sequence=GAGACTA;
3	fimo	nucleotide_motif	8606644	8606650	35	-	.	Name=DARACWW_3:8606640-8606653(-)+;Alias=MEME-1;ID=DARACWW-MEME-1-1-3:8606640-8606653(-);pvalue=0.000319;qvalue=0.0508;sequence=TAAACTT;
3	fimo	nucleotide_motif	8652533	8652539	21.8	+	.	Name=DARACWW_3:8652526-8652540(+)+;Alias=MEME-1;ID=DARACWW-MEME-1-1-3:8652526-8652540(+);pvalue=0.00665;qvalue=0.0986;sequence=AAGACAG;
3	fimo	nucleotide_motif	8687496	8687502	34	+	.	Name=DARACWW_3:8687490-8687503(+)+;Alias=MEME-1;ID=DARACWW-MEME-1-1-3:8687490-8687503(+);pvalue=0.0004;qvalue=0.0508;sequence=GAAACTT;
3	fimo	nucleotide_motif	8704156	8704162	41.1	+	.	Name=DARACWW_3:8704150-8704163(+)+;Alias=MEME-1;ID=DARACWW-MEME-1-1-3:8704150-8704163(+);pvalue=7.71e-05;qvalue=0.0467;sequence=TAGACTT;
3	fimo	nucleotide_motif	8729169	8729175	34	+	.	Name=DARACWW_3:8729163-8729176(+)+;Alias=MEME-1;ID=DARACWW-MEME-1-1-3:8729163-8729176(+);pvalue=0.0004;qvalue=0.0508;sequence=GAAACTT;
3	fimo	nucleotide_motif	8729725	8729731	26	-	.	Name=DARACWW_3:8729718-8729734(-)+;Alias=MEME-1;ID=DARACWW-MEME-1-1-3:8729718-8729734(-);pvalue=0.00252;qvalue=0.0778;sequence=AAAACTC;
3	fimo	nucleotide_motif	8839400	8839406	28.2	+	.	Name=DARACWW_3:8839394-8839407(+)+;Alias=MEME-1;ID=DARACWW-MEME-1-1-3:8839394-8839407(+);pvalue=0.00151;qvalue=0.0732;sequence=TAAACAT;
3	fimo	nucleotide_motif	8839408	8839414	29.7	+	.	Name=DARACWW_3:8839404-8839417(+)+;Alias=MEME-1;ID=DARACWW-MEME-1-1-3:8839404-8839417(+);pvalue=0.00108;qvalue=0.0664;sequence=GAGACTA;
3	fimo	nucleotide_motif	8919700	8919706	33	-	.	Name=DARACWW_3:8919697-8919711(-)+;Alias=MEME-1;ID=DARACWW-MEME-1-1-3:8919697-8919711(-);pvalue=0.0005;qvalue=0.0508;sequence=AAAACTT;
3	fimo	nucleotide_motif	8928312	8928318	31.9	-	.	Name=DARACWW_3:8928306-8928319(-)+;Alias=MEME-1;ID=DARACWW-MEME-1-1-3:8928306-8928319(-);pvalue=0.000651;qvalue=0.0555;sequence=GAGACAT;
3	fimo	nucleotide_motif	8963361	8963367	21.9	+	.	Name=DARACWW_3:8963358-8963371(+)+;Alias=MEME-1;ID=DARACWW-MEME-1-1-3:8963358-8963371(+);pvalue=0.00652;qvalue=0.0978;sequence=AAGATTT;
3	fimo	nucleotide_motif	8972059	8972065	22.7	+	.	Name=DARACWW_3:8972053-8972066(+)+;Alias=MEME-1;ID=DARACWW-MEME-1-1-3:8972053-8972066(+);pvalue=0.00537;qvalue=0.0935;sequence=GAAACAC;
3	fimo	nucleotide_motif	9047200	9047206	30.2	+	.	Name=DARACWW_3:9047196-9047209(+)+;Alias=MEME-1;ID=DARACWW-MEME-1-1-3:9047196-9047209(+);pvalue=0.000945;qvalue=0.0635;sequence=TGGACTT;
3	fimo	nucleotide_motif	9103800	9103806	24.3	+	.	Name=DARACWW_3:9103794-9103807(+)+;Alias=MEME-1;ID=DARACWW-MEME-1-1-3:9103794-9103807(+);pvalue=0.00367;qvalue=0.0857;sequence=AAGACAC;
3	fimo	nucleotide_motif	9126173	9126179	26.7	+	.	Name=DARACWW_3:9126171-9126184(+)+;Alias=MEME-1;ID=DARACWW-MEME-1-1-3:9126171-9126184(+);pvalue=0.00212;qvalue=0.0766;sequence=TAAACTC;
3	fimo	nucleotide_motif	9149610	9149616	31.9	-	.	Name=DARACWW_3:9149606-9149619(-)+;Alias=MEME-1;ID=DARACWW-MEME-1-1-3:9149606-9149619(-);pvalue=0.000651;qvalue=0.0555;sequence=GAGACAT;
3	fimo	nucleotide_motif	9149665	9149671	38.4	-	.	Name=DARACWW_3:9149661-9149674(-)+;Alias=MEME-1;ID=DARACWW-MEME-1-1-3:9149661-9149674(-);pvalue=0.000143;qvalue=0.0467;sequence=GAGACTT;
3	fimo	nucleotide_motif	9157089	9157095	22.5	-	.	Name=DARACWW_3:9157087-9157102(-)+;Alias=MEME-1;ID=DARACWW-MEME-1-1-3:9157087-9157102(-);pvalue=0.00567;qvalue=0.0952;sequence=AAAACAC;
3	fimo	nucleotide_motif	9191261	9191267	24.6	+	.	Name=DARACWW_3:9191257-9191270(+)+;Alias=MEME-1;ID=DARACWW-MEME-1-1-3:9191257-9191270(+);pvalue=0.00348;qvalue=0.0846;sequence=GAGACAC;
3	fimo	nucleotide_motif	9235023	9235029	41.1	+	.	Name=DARACWW_3:9235017-9235030(+)+;Alias=MEME-1;ID=DARACWW-MEME-1-1-3:9235017-9235030(+);pvalue=7.71e-05;qvalue=0.0467;sequence=TAGACTT;
3	fimo	nucleotide_motif	9235150	9235156	35	+	.	Name=DARACWW_3:9235146-9235160(+)+;Alias=MEME-1;ID=DARACWW-MEME-1-1-3:9235146-9235160(+);pvalue=0.000319;qvalue=0.0508;sequence=TAAACTT;
3	fimo	nucleotide_motif	9235320	9235326	38.4	-	.	Name=DARACWW_3:9235316-9235329(-)+;Alias=MEME-1;ID=DARACWW-MEME-1-1-3:9235316-9235329(-);pvalue=0.000143;qvalue=0.0467;sequence=GAGACTT;
3	fimo	nucleotide_motif	9269483	9269489	22.5	-	.	Name=DARACWW_3:9269479-9269494(-)+;Alias=MEME-1;ID=DARACWW-MEME-1-1-3:9269479-9269494(-);pvalue=0.00567;qvalue=0.0952;sequence=AAAACAC;
3	fimo	nucleotide_motif	9269489	9269495	24.7	-	.	Name=DARACWW_3:9269485-9269498(-)+;Alias=MEME-1;ID=DARACWW-MEME-1-1-3:9269485-9269498(-);pvalue=0.00342;qvalue=0.0846;sequence=CAGACTA;
3	fimo	nucleotide_motif	9271872	9271878	21.9	-	.	Name=DARACWW_3:9271867-9271880(-)+;Alias=MEME-1;ID=DARACWW-MEME-1-1-3:9271867-9271880(-);pvalue=0.00642;qvalue=0.0978;sequence=GAGATTT;
3	fimo	nucleotide_motif	9278506	9278512	24.3	+	.	Name=DARACWW_3:9278502-9278515(+)+;Alias=MEME-1;ID=DARACWW-MEME-1-1-3:9278502-9278515(+);pvalue=0.00367;qvalue=0.0857;sequence=GAGACCT;
3	fimo	nucleotide_motif	9357750	9357756	23.7	+	.	Name=DARACWW_3:9357744-9357757(+)+;Alias=MEME-1;ID=DARACWW-MEME-1-1-3:9357744-9357757(+);pvalue=0.00431;qvalue=0.0905;sequence=TAAACTG;
3	fimo	nucleotide_motif	9422697	9422703	22.8	-	.	Name=DARACWW_3:9422691-9422704(-)+;Alias=MEME-1;ID=DARACWW-MEME-1-1-3:9422691-9422704(-);pvalue=0.0053;qvalue=0.093;sequence=CAAACTA;
3	fimo	nucleotide_motif	9422749	9422755	36.5	-	.	Name=DARACWW_3:9422747-9422760(-)+;Alias=MEME-1;ID=DARACWW-MEME-1-1-3:9422747-9422760(-);pvalue=0.000224;qvalue=0.0467;sequence=AAGACTT;
3	fimo	nucleotide_motif	9491158	9491164	21.9	-	.	Name=DARACWW_3:9491151-9491164(-)+;Alias=MEME-1;ID=DARACWW-MEME-1-1-3:9491151-9491164(-);pvalue=0.00642;qvalue=0.0978;sequence=GAGATTT;
3	fimo	nucleotide_motif	9519392	9519398	29.3	+	.	Name=DARACWW_3:9519388-9519401(+)+;Alias=MEME-1;ID=DARACWW-MEME-1-1-3:9519388-9519401(+);pvalue=0.00116;qvalue=0.0681;sequence=AAGACTA;
3	fimo	nucleotide_motif	9540244	9540250	36.5	+	.	Name=DARACWW_3:9540238-9540251(+)+;Alias=MEME-1;ID=DARACWW-MEME-1-1-3:9540238-9540251(+);pvalue=0.000224;qvalue=0.0467;sequence=AAGACTT;
3	fimo	nucleotide_motif	9673293	9673299	26.7	+	.	Name=DARACWW_3:9673287-9673300(+)+;Alias=MEME-1;ID=DARACWW-MEME-1-1-3:9673287-9673300(+);pvalue=0.00212;qvalue=0.0766;sequence=TAAACTC;
3	fimo	nucleotide_motif	9673380	9673386	25.2	+	.	Name=DARACWW_3:9673374-9673387(+)+;Alias=MEME-1;ID=DARACWW-MEME-1-1-3:9673374-9673387(+);pvalue=0.003;qvalue=0.0822;sequence=GAGACAA;
3	fimo	nucleotide_motif	9758444	9758450	22.8	+	.	Name=DARACWW_3:9758439-9758452(+)+;Alias=MEME-1;ID=DARACWW-MEME-1-1-3:9758439-9758452(+);pvalue=0.0053;qvalue=0.093;sequence=AGAACAT;
3	fimo	nucleotide_motif	9796855	9796861	27.3	+	.	Name=DARACWW_3:9796849-9796863(+)+;Alias=MEME-1;ID=DARACWW-MEME-1-1-3:9796849-9796863(+);pvalue=0.00188;qvalue=0.0756;sequence=CAAACTT;
3	fimo	nucleotide_motif	9796927	9796933	24.9	+	.	Name=DARACWW_3:9796920-9796936(+)+;Alias=MEME-1;ID=DARACWW-MEME-1-1-3:9796920-9796936(+);pvalue=0.00323;qvalue=0.0822;sequence=AAGACTG;
3	fimo	nucleotide_motif	9796968	9796974	27.4	+	.	Name=DARACWW_3:9796962-9796977(+)+;Alias=MEME-1;ID=DARACWW-MEME-1-1-3:9796962-9796977(+);pvalue=0.0018;qvalue=0.0746;sequence=TAAACTA;
3	fimo	nucleotide_motif	9796977	9796983	27.3	+	.	Name=DARACWW_3:9796970-9796985(+)+;Alias=MEME-1;ID=DARACWW-MEME-1-1-3:9796970-9796985(+);pvalue=0.00188;qvalue=0.0756;sequence=CAAACTT;
3	fimo	nucleotide_motif	9798006	9798012	26.7	+	.	Name=DARACWW_3:9798000-9798013(+)+;Alias=MEME-1;ID=DARACWW-MEME-1-1-3:9798000-9798013(+);pvalue=0.00212;qvalue=0.0766;sequence=TAAACTC;
3	fimo	nucleotide_motif	9814680	9814686	22.2	+	.	Name=DARACWW_3:9814673-9814686(+)+;Alias=MEME-1;ID=DARACWW-MEME-1-1-3:9814673-9814686(+);pvalue=0.00599;qvalue=0.0965;sequence=ATGACTT;
3	fimo	nucleotide_motif	9850426	9850432	23.7	+	.	Name=DARACWW_3:9850420-9850433(+)+;Alias=MEME-1;ID=DARACWW-MEME-1-1-3:9850420-9850433(+);pvalue=0.00431;qvalue=0.0905;sequence=TAAACAA;
3	fimo	nucleotide_motif	9870554	9870560	24.9	+	.	Name=DARACWW_3:9870547-9870561(+)+;Alias=MEME-1;ID=DARACWW-MEME-1-1-3:9870547-9870561(+);pvalue=0.00323;qvalue=0.0822;sequence=AAGACAA;
3	fimo	nucleotide_motif	9907304	9907310	23	-	.	Name=DARACWW_3:9907300-9907313(-)+;Alias=MEME-1;ID=DARACWW-MEME-1-1-3:9907300-9907313(-);pvalue=0.00506;qvalue=0.0905;sequence=AAAACTG;
3	fimo	nucleotide_motif	9907392	9907398	30.2	-	.	Name=DARACWW_3:9907388-9907401(-)+;Alias=MEME-1;ID=DARACWW-MEME-1-1-3:9907388-9907401(-);pvalue=0.000945;qvalue=0.0635;sequence=TGGACTT;
3	fimo	nucleotide_motif	9911972	9911978	23	-	.	Name=DARACWW_3:9911971-9911984(-)+;Alias=MEME-1;ID=DARACWW-MEME-1-1-3:9911971-9911984(-);pvalue=0.00506;qvalue=0.0905;sequence=AAAACAA;
3	fimo	nucleotide_motif	9978173	9978179	22.2	-	.	Name=DARACWW_3:9978170-9978183(-)+;Alias=MEME-1;ID=DARACWW-MEME-1-1-3:9978170-9978183(-);pvalue=0.00599;qvalue=0.0965;sequence=AAAACCT;
3	fimo	nucleotide_motif	9991481	9991487	24.2	+	.	Name=DARACWW_3:9991474-9991490(+)+;Alias=MEME-1;ID=DARACWW-MEME-1-1-3:9991474-9991490(+);pvalue=0.00379;qvalue=0.0872;sequence=AAGACCT;
3	fimo	nucleotide_motif	9991687	9991693	23.3	+	.	Name=DARACWW_3:9991681-9991694(+)+;Alias=MEME-1;ID=DARACWW-MEME-1-1-3:9991681-9991694(+);pvalue=0.00471;qvalue=0.0905;sequence=GAAACAA;
3	fimo	nucleotide_motif	9991723	9991729	29.3	+	.	Name=DARACWW_3:9991717-9991730(+)+;Alias=MEME-1;ID=DARACWW-MEME-1-1-3:9991717-9991730(+);pvalue=0.00116;qvalue=0.0681;sequence=AAGACTA;
3	fimo	nucleotide_motif	10018853	10018859	22.7	+	.	Name=DARACWW_3:10018847-10018860(+)+;Alias=MEME-1;ID=DARACWW-MEME-1-1-3:10018847-10018860(+);pvalue=0.00537;qvalue=0.0935;sequence=GAAACAC;
3	fimo	nucleotide_motif	10055915	10055921	33	-	.	Name=DARACWW_3:10055911-10055924(-)+;Alias=MEME-1;ID=DARACWW-MEME-1-1-3:10055911-10055924(-);pvalue=0.0005;qvalue=0.0508;sequence=AAAACTT;
3	fimo	nucleotide_motif	10055978	10055984	24.2	-	.	Name=DARACWW_3:10055974-10055987(-)+;Alias=MEME-1;ID=DARACWW-MEME-1-1-3:10055974-10055987(-);pvalue=0.00379;qvalue=0.0872;sequence=AAGACCT;
3	fimo	nucleotide_motif	10083166	10083172	24.7	-	.	Name=DARACWW_3:10083162-10083175(-)+;Alias=MEME-1;ID=DARACWW-MEME-1-1-3:10083162-10083175(-);pvalue=0.00342;qvalue=0.0846;sequence=AGGACAT;
3	fimo	nucleotide_motif	10083228	10083234	26	-	.	Name=DARACWW_3:10083225-10083238(-)+;Alias=MEME-1;ID=DARACWW-MEME-1-1-3:10083225-10083238(-);pvalue=0.00252;qvalue=0.0778;sequence=AAAACTC;
3	fimo	nucleotide_motif	10092621	10092627	28.5	+	.	Name=DARACWW_3:10092617-10092630(+)+;Alias=MEME-1;ID=DARACWW-MEME-1-1-3:10092617-10092630(+);pvalue=0.00141;qvalue=0.0732;sequence=AAGACTC;
3	fimo	nucleotide_motif	10102350	10102356	24.7	+	.	Name=DARACWW_3:10102344-10102357(+)+;Alias=MEME-1;ID=DARACWW-MEME-1-1-3:10102344-10102357(+);pvalue=0.00342;qvalue=0.0846;sequence=CAGACTA;
3	fimo	nucleotide_motif	10122757	10122763	22.5	+	.	Name=DARACWW_3:10122753-10122766(+)+;Alias=MEME-1;ID=DARACWW-MEME-1-1-3:10122753-10122766(+);pvalue=0.00567;qvalue=0.0952;sequence=GAAACCT;
3	fimo	nucleotide_motif	10130992	10130998	26	-	.	Name=DARACWW_3:10130987-10131001(-)+;Alias=MEME-1;ID=DARACWW-MEME-1-1-3:10130987-10131001(-);pvalue=0.00252;qvalue=0.0778;sequence=AAAACTC;
3	fimo	nucleotide_motif	10133286	10133292	21.9	-	.	Name=DARACWW_3:10133281-10133294(-)+;Alias=MEME-1;ID=DARACWW-MEME-1-1-3:10133281-10133294(-);pvalue=0.00652;qvalue=0.0978;sequence=AAGATTT;
3	fimo	nucleotide_motif	10155211	10155217	24.1	+	.	Name=DARACWW_3:10155205-10155218(+)+;Alias=MEME-1;ID=DARACWW-MEME-1-1-3:10155205-10155218(+);pvalue=0.00384;qvalue=0.0872;sequence=CAGACTC;
3	fimo	nucleotide_motif	10214231	10214237	34	-	.	Name=DARACWW_3:10214227-10214240(-)+;Alias=MEME-1;ID=DARACWW-MEME-1-1-3:10214227-10214240(-);pvalue=0.0004;qvalue=0.0508;sequence=GAAACTT;
3	fimo	nucleotide_motif	10285673	10285679	27.4	-	.	Name=DARACWW_3:10285669-10285682(-)+;Alias=MEME-1;ID=DARACWW-MEME-1-1-3:10285669-10285682(-);pvalue=0.0018;qvalue=0.0746;sequence=TAAACTA;
3	fimo	nucleotide_motif	10285746	10285752	23.3	-	.	Name=DARACWW_3:10285742-10285755(-)+;Alias=MEME-1;ID=DARACWW-MEME-1-1-3:10285742-10285755(-);pvalue=0.00471;qvalue=0.0905;sequence=GAAACAA;
3	fimo	nucleotide_motif	10317974	10317980	22.8	+	.	Name=DARACWW_3:10317968-10317982(+)+;Alias=MEME-1;ID=DARACWW-MEME-1-1-3:10317968-10317982(+);pvalue=0.0053;qvalue=0.093;sequence=CAAACTA;
3	fimo	nucleotide_motif	10445299	10445305	25.2	+	.	Name=DARACWW_3:10445295-10445308(+)+;Alias=MEME-1;ID=DARACWW-MEME-1-1-3:10445295-10445308(+);pvalue=0.003;qvalue=0.0822;sequence=GAGACAA;
3	fimo	nucleotide_motif	10509186	10509192	26.2	+	.	Name=DARACWW_3:10509184-10509197(+)+;Alias=MEME-1;ID=DARACWW-MEME-1-1-3:10509184-10509197(+);pvalue=0.00237;qvalue=0.0778;sequence=AGAACTT;
3	fimo	nucleotide_motif	10669253	10669259	24.6	+	.	Name=DARACWW_3:10669249-10669262(+)+;Alias=MEME-1;ID=DARACWW-MEME-1-1-3:10669249-10669262(+);pvalue=0.00348;qvalue=0.0846;sequence=GAGACAC;
3	fimo	nucleotide_motif	10757819	10757825	22.2	+	.	Name=DARACWW_3:10757812-10757825(+)+;Alias=MEME-1;ID=DARACWW-MEME-1-1-3:10757812-10757825(+);pvalue=0.00599;qvalue=0.0965;sequence=AAAACCT;
3	fimo	nucleotide_motif	10780506	10780512	23	+	.	Name=DARACWW_3:10780498-10780512(+)+;Alias=MEME-1;ID=DARACWW-MEME-1-1-3:10780498-10780512(+);pvalue=0.00506;qvalue=0.0905;sequence=AAAACTG;
3	fimo	nucleotide_motif	10784387	10784393	36.5	+	.	Name=DARACWW_3:10784383-10784396(+)+;Alias=MEME-1;ID=DARACWW-MEME-1-1-3:10784383-10784396(+);pvalue=0.000224;qvalue=0.0467;sequence=AAGACTT;
3	fimo	nucleotide_motif	10784472	10784478	25.2	+	.	Name=DARACWW_3:10784468-10784481(+)+;Alias=MEME-1;ID=DARACWW-MEME-1-1-3:10784468-10784481(+);pvalue=0.003;qvalue=0.0822;sequence=GAGACAA;
3	fimo	nucleotide_motif	10870201	10870207	24.3	-	.	Name=DARACWW_3:10870195-10870208(-)+;Alias=MEME-1;ID=DARACWW-MEME-1-1-3:10870195-10870208(-);pvalue=0.00367;qvalue=0.0857;sequence=TGGACTA;
3	fimo	nucleotide_motif	10870226	10870232	33	-	.	Name=DARACWW_3:10870220-10870233(-)+;Alias=MEME-1;ID=DARACWW-MEME-1-1-3:10870220-10870233(-);pvalue=0.0005;qvalue=0.0508;sequence=AAAACTT;
3	fimo	nucleotide_motif	10870263	10870269	23	-	.	Name=DARACWW_3:10870260-10870273(-)+;Alias=MEME-1;ID=DARACWW-MEME-1-1-3:10870260-10870273(-);pvalue=0.00506;qvalue=0.0905;sequence=AAAACAA;
3	fimo	nucleotide_motif	10902799	10902805	32.3	-	.	Name=DARACWW_3:10902795-10902808(-)+;Alias=MEME-1;ID=DARACWW-MEME-1-1-3:10902795-10902808(-);pvalue=0.000582;qvalue=0.0548;sequence=TAGACAT;
3	fimo	nucleotide_motif	10902822	10902828	34	-	.	Name=DARACWW_3:10902815-10902828(-)+;Alias=MEME-1;ID=DARACWW-MEME-1-1-3:10902815-10902828(-);pvalue=0.0004;qvalue=0.0508;sequence=GAAACTT;
3	fimo	nucleotide_motif	10968227	10968233	24.9	-	.	Name=DARACWW_3:10968223-10968236(-)+;Alias=MEME-1;ID=DARACWW-MEME-1-1-3:10968223-10968236(-);pvalue=0.00323;qvalue=0.0822;sequence=AAGACAA;
3	fimo	nucleotide_motif	11136106	11136112	22.1	-	.	Name=DARACWW_3:11136104-11136117(-)+;Alias=MEME-1;ID=DARACWW-MEME-1-1-3:11136104-11136117(-);pvalue=0.00612;qvalue=0.0968;sequence=TAGACAG;
3	fimo	nucleotide_motif	11155009	11155015	23	-	.	Name=DARACWW_3:11155005-11155018(-)+;Alias=MEME-1;ID=DARACWW-MEME-1-1-3:11155005-11155018(-);pvalue=0.00506;qvalue=0.0905;sequence=TTGACTT;
[truncated: 1,872 more rows]
