# Supplementary material for: Nanopore direct RNA sequencing maps the complexity of Arabidopsis mRNA processing and m6A modification
Source: eLife. 2020 Jan 14;9:e49658. doi: 10.7554/eLife.49658 (PMC6959997; doi:10.7554/eLife.49658)
Supplement: Figure 5—source data 3. [file elife-49658-fig5-data3.tds]

1	10478004	10478005	.	1000	+	5.000000	5.000000	10478004	10478005	14.29180	10478004	10478005	inf
1	10722261	10722262	.	1000	+	5.000000	5.000000	10722261	10722262	14.29180	10722261	10722262	inf
1	25049274	25049275	.	1000	-	5.000000	5.000000	25049274	25049275	14.29180	25049274	25049275	inf
2	3705	3706	.	1000	+	5.000000	5.000000	3705	3706	14.29180	3705	3706	inf
2	4556	4557	.	1000	+	5.000000	5.000000	4556	4557	6.92519	4556	4557	inf
2	4901	4902	.	1000	+	5.000000	5.000000	4901	4902	11.25520	4901	4902	inf
2	5452	5453	.	1000	+	5.000000	5.000000	5452	5453	12.66990	5452	5453	inf
2	5453	5454	.	1000	+	5.000000	5.000000	5453	5454	14.28250	5453	5454	inf
2	5454	5455	.	1000	+	5.000000	5.000000	5454	5455	13.54470	5454	5455	inf
2	5455	5456	.	1000	+	5.000000	5.000000	5455	5456	10.30190	5455	5456	inf
2	5780	5781	.	1000	+	5.000000	5.000000	5780	5781	14.29180	5780	5781	inf
2	5781	5782	.	1000	+	5.000000	5.000000	5781	5782	14.29180	5781	5782	inf
2	5782	5783	.	1000	+	5.000000	5.000000	5782	5783	14.29180	5782	5783	inf
2	5783	5784	.	1000	+	5.000000	5.000000	5783	5784	14.29180	5783	5784	inf
2	5784	5785	.	1000	+	5.000000	5.000000	5784	5785	14.29180	5784	5785	inf
2	5785	5786	.	1000	+	5.000000	5.000000	5785	5786	14.29180	5785	5786	inf
2	6790	6791	.	1000	+	5.000000	5.000000	6790	6791	14.29180	6790	6791	inf
2	6791	6792	.	1000	+	5.000000	5.000000	6791	6792	14.29180	6791	6792	inf
2	7346	7347	.	1000	+	5.000000	5.000000	7346	7347	14.29180	7346	7347	inf
2	8737696	8737697	.	1000	+	5.000000	5.000000	8737696	8737697	14.29180	8737696	8737697	inf
2	8760531	8760532	.	1000	+	5.000000	5.000000	8760531	8760532	9.10412	8760531	8760532	inf
2	14523563	14523564	.	1000	-	5.000000	5.000000	14523563	14523564	14.29180	14523563	14523564	inf
3	14197676	14197677	.	1000	+	5.000000	5.000000	14197676	14197677	14.29180	14197676	14197677	inf
3	14198527	14198528	.	1000	+	5.000000	5.000000	14198527	14198528	6.68064	14198527	14198528	inf
3	14198872	14198873	.	1000	+	5.000000	5.000000	14198872	14198873	11.01730	14198872	14198873	inf
3	14199423	14199424	.	1000	+	5.000000	5.000000	14199423	14199424	12.66990	14199423	14199424	inf
3	14199424	14199425	.	1000	+	5.000000	5.000000	14199424	14199425	14.29180	14199424	14199425	inf
3	14199425	14199426	.	1000	+	5.000000	5.000000	14199425	14199426	13.54470	14199425	14199426	inf
3	14199426	14199427	.	1000	+	5.000000	5.000000	14199426	14199427	10.06290	14199426	14199427	inf
3	14199447	14199448	.	1000	+	5.000000	5.000000	14199447	14199448	14.25560	14199447	14199448	inf
3	14199751	14199752	.	1000	+	5.000000	5.000000	14199751	14199752	14.29180	14199751	14199752	inf
3	14199752	14199753	.	1000	+	5.000000	5.000000	14199752	14199753	14.29180	14199752	14199753	inf
3	14199753	14199754	.	1000	+	5.000000	5.000000	14199753	14199754	14.29180	14199753	14199754	inf
3	14199754	14199755	.	1000	+	5.000000	5.000000	14199754	14199755	14.29180	14199754	14199755	inf
3	14199755	14199756	.	1000	+	5.000000	5.000000	14199755	14199756	14.29180	14199755	14199756	inf
3	14199756	14199757	.	1000	+	5.000000	5.000000	14199756	14199757	14.29180	14199756	14199757	inf
3	14200761	14200762	.	1000	+	5.000000	5.000000	14200761	14200762	14.29180	14200761	14200762	inf
3	14200762	14200763	.	1000	+	5.000000	5.000000	14200762	14200763	14.29180	14200762	14200763	inf
3	14201317	14201318	.	1000	+	5.000000	5.000000	14201317	14201318	14.29180	14201317	14201318	inf
3	22747132	22747133	.	1000	+	5.000000	5.000000	22747132	22747133	14.29180	22747132	22747133	inf
3	5669559	5669560	.	1000	-	5.000000	5.000000	5669559	5669560	14.29180	5669559	5669560	inf
4	7522552	7522553	.	1000	+	5.000000	5.000000	7522552	7522553	14.29180	7522552	7522553	inf
4	7522568	7522569	.	1000	+	5.000000	5.000000	7522568	7522569	14.29180	7522568	7522569	inf
4	7522577	7522578	.	1000	+	5.000000	5.000000	7522577	7522578	14.29180	7522577	7522578	inf
4	7522578	7522579	.	1000	+	5.000000	5.000000	7522578	7522579	14.29180	7522578	7522579	inf
5	210285	210286	.	1000	+	5.000000	5.000000	210285	210286	14.29180	210285	210286	inf
5	210301	210302	.	1000	+	5.000000	5.000000	210301	210302	14.29180	210301	210302	inf
5	12593558	12593559	.	1000	-	5.000000	5.000000	12593558	12593559	inf	12593558	12593559	13.03290
5	12593559	12593560	.	1000	-	5.000000	5.000000	12593559	12593560	inf	12593559	12593560	12.49760
Pt	101011	101012	.	1000	+	5.000000	5.000000	101011	101012	8.38159	101011	101012	inf
Pt	101926	101927	.	1000	+	5.000000	5.000000	101926	101927	14.25560	101926	101927	inf
Pt	101928	101929	.	1000	+	5.000000	5.000000	101928	101929	9.82368	101928	101929	inf
Pt	102458	102459	.	1000	+	5.000000	5.000000	102458	102459	14.18370	102458	102459	inf
Pt	104690	104691	.	1000	+	5.000000	5.000000	104690	104691	14.29180	104690	104691	inf
Pt	104691	104692	.	1000	+	5.000000	5.000000	104691	104692	14.29180	104691	104692	inf
Pt	106446	106447	.	1000	+	5.000000	5.000000	106446	106447	9.34428	106446	106447	inf
Pt	106620	106621	.	1000	+	5.000000	5.000000	106620	106621	14.29180	106620	106621	inf
Pt	132027	132028	.	1000	-	5.000000	5.000000	132027	132028	14.29180	132027	132028	inf
Pt	132201	132202	.	1000	-	5.000000	5.000000	132201	132202	9.34428	132201	132202	inf
Pt	133956	133957	.	1000	-	5.000000	5.000000	133956	133957	14.29180	133956	133957	inf
Pt	133957	133958	.	1000	-	5.000000	5.000000	133957	133958	14.29180	133957	133958	inf
Pt	136189	136190	.	1000	-	5.000000	5.000000	136189	136190	14.18370	136189	136190	inf
Pt	136721	136722	.	1000	-	5.000000	5.000000	136721	136722	14.25560	136721	136722	inf
Pt	137636	137637	.	1000	-	5.000000	5.000000	137636	137637	8.38159	137636	137637	inf
2	5476	5477	.	1000	+	5.000000	5.000000	5476	5477	14.25560	5476	5477	14.80850
1	18986493	18986494	.	1000	+	5.000000	5.000000	18986493	18986494	14.29180	18986493	18986494	14.19870
Pt	104865	104866	.	1000	+	5.000000	5.000000	104865	104866	14.29180	104865	104866	14.05150
4	7522569	7522570	.	1000	+	5.000000	5.000000	7522569	7522570	14.29180	7522569	7522570	13.91320
3	14199757	14199758	.	1000	+	5.000000	5.000000	14199757	14199758	14.29180	14199757	14199758	13.78140
4	14202892	14202893	.	1000	-	5.000000	5.000000	14202892	14202893	14.29180	14202892	14202893	13.78140
Pt	133782	133783	.	1000	-	5.000000	5.000000	133782	133783	14.29180	133782	133783	13.78140
4	1441821	1441822	.	1000	+	5.000000	5.000000	1441821	1441822	14.29180	1441821	1441822	13.65570
4	14202886	14202887	.	1000	-	5.000000	5.000000	14202886	14202887	14.29180	14202886	14202887	13.41300
5	13086873	13086874	.	1000	+	5.000000	5.000000	13086873	13086874	13.34070	13086873	13086874	14.36350
2	6539	6540	.	1000	+	5.000000	5.000000	6539	6540	13.72930	6539	6540	13.91320
2	5786	5787	.	1000	+	5.000000	5.000000	5786	5787	14.29180	5786	5787	13.17860
5	210280	210281	.	1000	+	5.000000	5.000000	210280	210281	14.29180	210280	210281	12.94860
Pt	104834	104835	.	1000	+	5.000000	5.000000	104834	104835	14.11570	104834	104835	13.06310
3	14200510	14200511	.	1000	+	5.000000	5.000000	14200510	14200511	13.72930	14200510	14200511	13.41300
Pt	104759	104760	.	1000	+	5.000000	5.000000	104759	104760	13.89010	104759	104760	13.17860
1	29736873	29736874	.	1000	+	5.000000	5.000000	29736873	29736874	14.29180	29736873	29736874	12.72180
3	14199418	14199419	.	1000	+	5.000000	5.000000	14199418	14199419	12.20250	14199418	14199419	14.80850
Pt	133813	133814	.	1000	-	5.000000	5.000000	133813	133814	14.11570	133813	133814	12.72180
3	5468630	5468631	.	1000	-	5.000000	5.000000	5468630	5468631	14.29180	5468630	5468631	12.49640
2	5450	5451	.	1000	+	5.000000	5.000000	5450	5451	12.20250	5450	5451	14.55660
Pt	133888	133889	.	1000	-	5.000000	5.000000	133888	133889	13.72930	133888	133889	12.83500
1	2047882	2047883	.	1000	+	5.000000	5.000000	2047882	2047883	14.29180	2047882	2047883	12.27160
Pt	107948	107949	.	1000	+	5.000000	5.000000	107948	107949	14.29180	107948	107949	12.27160
4	7522558	7522559	.	1000	+	5.000000	5.000000	7522558	7522559	14.29180	7522558	7522559	12.15940
Pt	130699	130700	.	1000	-	5.000000	5.000000	130699	130700	14.29180	130699	130700	12.15940
5	210274	210275	.	1000	+	5.000000	5.000000	210274	210275	14.29180	210274	210275	12.04730
2	5449	5450	.	1000	+	5.000000	5.000000	5449	5450	11.49280	5449	5450	14.80850
3	22747107	22747108	.	1000	+	5.000000	5.000000	22747107	22747108	14.29180	22747107	22747108	11.93520
4	7522567	7522568	.	1000	+	5.000000	5.000000	7522567	7522568	14.29180	7522567	7522568	11.93520
Pt	107949	107950	.	1000	+	5.000000	5.000000	107949	107950	13.89010	107949	107950	12.27160
Pt	130698	130699	.	1000	-	5.000000	5.000000	130698	130699	13.89010	130698	130699	12.27160
2	5447	5448	.	1000	+	5.000000	5.000000	5447	5448	12.20250	5447	5448	13.91320
3	14199421	14199422	.	1000	+	5.000000	5.000000	14199421	14199422	12.20250	14199421	14199422	13.91320
2	8430	8431	.	1000	+	5.000000	5.000000	8430	8431	12.43710	8430	8431	13.65570
3	14202401	14202402	.	1000	+	5.000000	5.000000	14202401	14202402	12.43710	14202401	14202402	13.41300
4	7522553	7522554	.	1000	+	5.000000	5.000000	7522553	7522554	14.29180	7522553	7522554	11.48700
5	210284	210285	.	1000	+	5.000000	5.000000	210284	210285	14.28250	210284	210285	11.37490
3	14199420	14199421	.	1000	+	5.000000	5.000000	14199420	14199421	11.73000	14199420	14199421	13.91320
3	5669591	5669592	.	1000	-	5.000000	5.000000	5669591	5669592	14.29180	5669591	5669592	11.15060
4	17831826	17831827	.	1000	-	5.000000	5.000000	17831826	17831827	14.29180	17831826	17831827	11.15060
Pt	104780	104781	.	1000	+	5.000000	5.000000	104780	104781	14.29180	104780	104781	11.03840
2	8914	8915	.	1000	+	5.000000	5.000000	8914	8915	11.73000	8914	8915	13.53300
3	22747125	22747126	.	1000	+	5.000000	5.000000	22747125	22747126	14.29180	22747125	22747126	10.92620
4	7522550	7522551	.	1000	+	5.000000	5.000000	7522550	7522551	14.29180	7522550	7522551	10.92620
5	19962835	19962836	.	1000	+	5.000000	5.000000	19962835	19962836	14.29180	19962835	19962836	10.92620
Pt	133867	133868	.	1000	-	5.000000	5.000000	133867	133868	14.29180	133867	133868	10.92620
3	14199758	14199759	.	1000	+	5.000000	5.000000	14199758	14199759	11.01730	14199758	14199759	14.19870
3	20339667	20339668	.	1000	-	5.000000	5.000000	20339667	20339668	14.02010	20339667	20339668	11.15060
1	2641785	2641786	.	1000	-	5.000000	5.000000	2641785	2641786	14.29180	2641785	2641786	10.70160
3	22747122	22747123	.	1000	+	5.000000	5.000000	22747122	22747123	14.29180	22747122	22747123	10.70160
2	15422777	15422778	.	1000	+	5.000000	5.000000	15422777	15422778	14.29180	15422777	15422778	10.58920
3	7376677	7376678	.	1000	-	5.000000	5.000000	7376677	7376678	14.29180	7376677	7376678	10.58920
Pt	136719	136720	.	1000	-	5.000000	5.000000	136719	136720	10.06290	136719	136720	14.80850
2	5787	5788	.	1000	+	5.000000	5.000000	5787	5788	11.01730	5787	5788	13.78140
2	8431	8432	.	1000	+	5.000000	5.000000	8431	8432	11.01730	8431	8432	13.78140
2	8432	8433	.	1000	+	5.000000	5.000000	8432	8433	11.73000	8432	8433	13.06310
3	14202885	14202886	.	1000	+	5.000000	5.000000	14202885	14202886	11.73000	14202885	14202886	13.06310
3	14199465	14199466	.	1000	+	5.000000	5.000000	14199465	14199466	10.77910	14199465	14199466	13.91320
3	20339651	20339652	.	1000	-	5.000000	5.000000	20339651	20339652	14.29180	20339651	20339652	10.36430
4	7522547	7522548	.	1000	+	5.000000	5.000000	7522547	7522548	14.29180	7522547	7522548	10.36430
4	7522556	7522557	.	1000	+	5.000000	5.000000	7522556	7522557	14.29180	7522556	7522557	10.36430
3	14200509	14200510	.	1000	+	5.000000	5.000000	14200509	14200510	13.34070	14200509	14200510	11.26280
5	210283	210284	.	1000	+	5.000000	5.000000	210283	210284	14.11570	210283	210284	10.47680
3	14202403	14202404	.	1000	+	5.000000	5.000000	14202403	14202404	11.49280	14202403	14202404	13.06310
1	7043325	7043326	.	1000	-	5.000000	5.000000	7043325	7043326	14.29180	7043325	7043326	10.25170
3	6463557	6463558	.	1000	+	5.000000	5.000000	6463557	6463558	14.29180	6463557	6463558	10.25170
3	22747105	22747106	.	1000	+	5.000000	5.000000	22747105	22747106	14.29180	22747105	22747106	10.25170
3	2605630	2605631	.	1000	-	5.000000	5.000000	2605630	2605631	14.29180	2605630	2605631	10.25170
4	7522546	7522547	.	1000	+	5.000000	5.000000	7522546	7522547	14.29180	7522546	7522547	10.25170
4	7522562	7522563	.	1000	+	5.000000	5.000000	7522562	7522563	14.29180	7522562	7522563	10.25170
2	6538	6539	.	1000	+	5.000000	5.000000	6538	6539	13.34070	6538	6539	11.15060
5	210276	210277	.	1000	+	5.000000	5.000000	210276	210277	14.11570	210276	210277	10.36430
Pt	104693	104694	.	1000	+	5.000000	5.000000	104693	104694	14.29180	104693	104694	10.13910
2	8401	8402	.	1000	+	5.000000	5.000000	8401	8402	9.58413	8401	8402	14.80850
3	14197677	14197678	.	1000	+	5.000000	5.000000	14197677	14197678	9.58413	14197677	14197678	14.80850
2	3706	3707	.	1000	+	5.000000	5.000000	3706	3707	9.82368	3706	3707	14.55660
1	5447760	5447761	.	1000	-	5.000000	5.000000	5447760	5447761	14.29180	5447760	5447761	10.02650
1	11214937	11214938	.	1000	-	5.000000	5.000000	11214937	11214938	14.29180	11214937	11214938	10.02650
3	14202402	14202403	.	1000	+	5.000000	5.000000	14202402	14202403	11.25520	14202402	14202403	13.06310
Pt	133866	133867	.	1000	-	5.000000	5.000000	133866	133867	14.18370	133866	133867	10.02650
2	8737691	8737692	.	1000	+	5.000000	5.000000	8737691	8737692	14.29180	8737691	8737692	9.91376
4	7522548	7522549	.	1000	+	5.000000	5.000000	7522548	7522549	14.29180	7522548	7522549	9.91376
4	7522576	7522577	.	1000	+	5.000000	5.000000	7522576	7522577	14.29180	7522576	7522577	9.91376
1	8268682	8268683	.	1000	-	5.000000	5.000000	8268682	8268683	14.29180	8268682	8268683	9.80098
3	22747124	22747125	.	1000	+	5.000000	5.000000	22747124	22747125	14.29180	22747124	22747125	9.80098
5	21632645	21632646	.	1000	-	5.000000	5.000000	21632645	21632646	14.29180	21632645	21632646	9.80098
2	6643	6644	.	1000	+	5.000000	5.000000	6643	6644	13.12400	6643	6644	10.92620
3	14200614	14200615	.	1000	+	5.000000	5.000000	14200614	14200615	13.12400	14200614	14200615	10.92620
Pt	104781	104782	.	1000	+	5.000000	5.000000	104781	104782	14.11570	104781	104782	9.91376
2	6614	6615	.	1000	+	5.000000	5.000000	6614	6615	12.20250	6614	6615	11.82320
3	14200585	14200586	.	1000	+	5.000000	5.000000	14200585	14200586	12.20250	14200585	14200586	11.82320
1	10723064	10723065	.	1000	+	5.000000	5.000000	10723064	10723065	14.29180	10723064	10723065	9.68813
1	10723065	10723066	.	1000	+	5.000000	5.000000	10723065	10723066	14.29180	10723065	10723066	9.68813
5	26451094	26451095	.	1000	-	5.000000	5.000000	26451094	26451095	14.29180	26451094	26451095	9.68813
4	7522564	7522565	.	1000	+	5.000000	5.000000	7522564	7522565	14.28250	7522564	7522565	9.68813
3	14202372	14202373	.	1000	+	5.000000	5.000000	14202372	14202373	9.58413	14202372	14202373	14.36350
1	17498479	17498480	.	1000	-	5.000000	5.000000	17498479	17498480	12.66990	17498479	17498480	11.26280
1	29736862	29736863	.	1000	+	5.000000	5.000000	29736862	29736863	14.29180	29736862	29736863	9.57521
3	22747116	22747117	.	1000	+	5.000000	5.000000	22747116	22747117	14.29180	22747116	22747117	9.57521
1	8268674	8268675	.	1000	-	5.000000	5.000000	8268674	8268675	14.25560	8268674	8268675	9.57521
1	11661633	11661634	.	1000	+	5.000000	5.000000	11661633	11661634	14.29180	11661633	11661634	9.46223
1	8268654	8268655	.	1000	-	5.000000	5.000000	8268654	8268655	14.29180	8268654	8268655	9.46223
4	494750	494751	.	1000	+	5.000000	5.000000	494750	494751	14.29180	494750	494751	9.46223
5	26451107	26451108	.	1000	-	5.000000	5.000000	26451107	26451108	14.27330	26451107	26451108	9.46223
2	5494	5495	.	1000	+	5.000000	5.000000	5494	5495	10.06290	5494	5495	13.65570
5	507243	507244	.	1000	-	5.000000	5.000000	507243	507244	14.02010	507243	507244	9.68813
5	7016401	7016402	.	1000	+	5.000000	5.000000	7016401	7016402	14.11570	7016401	7016402	9.57521
Pt	105132	105133	.	1000	+	5.000000	5.000000	105132	105133	14.11570	105132	105133	9.57521
3	23053670	23053671	.	1000	+	5.000000	5.000000	23053670	23053671	14.29180	23053670	23053671	9.34917
Pt	133954	133955	.	1000	-	5.000000	5.000000	133954	133955	14.29180	133954	133955	9.34917
Pt	133515	133516	.	1000	-	5.000000	5.000000	133515	133516	14.02010	133515	133516	9.57521
1	9207239	9207240	.	1000	+	5.000000	5.000000	9207239	9207240	14.29180	9207239	9207240	9.23605
1	29736871	29736872	.	1000	+	5.000000	5.000000	29736871	29736872	14.29180	29736871	29736872	9.23605
3	5669607	5669608	.	1000	-	5.000000	5.000000	5669607	5669608	14.29180	5669607	5669608	9.23605
4	1441811	1441812	.	1000	+	5.000000	5.000000	1441811	1441812	14.29180	1441811	1441812	9.23605
4	2672027	2672028	.	1000	-	5.000000	5.000000	2672027	2672028	14.29180	2672027	2672028	9.23605
2	14524755	14524756	.	1000	+	5.000000	5.000000	14524755	14524756	13.34070	14524755	14524756	10.13910
3	5669593	5669594	.	1000	-	5.000000	5.000000	5669593	5669594	14.11570	5669593	5669594	9.34917
4	14202896	14202897	.	1000	-	5.000000	5.000000	14202896	14202897	14.29180	14202896	14202897	9.12284
3	5669558	5669559	.	1000	-	5.000000	5.000000	5669558	5669559	14.28250	5669558	5669559	9.12284
2	8407	8408	.	1000	+	5.000000	5.000000	8407	8408	10.06290	8407	8408	13.29470
2	11270823	11270824	.	1000	+	5.000000	5.000000	11270823	11270824	14.18370	11270823	11270824	9.12284
5	3111062	3111063	.	1000	-	5.000000	5.000000	3111062	3111063	13.72930	3111062	3111063	9.57521
1	22444513	22444514	.	1000	+	5.000000	5.000000	22444513	22444514	14.29180	22444513	22444514	9.00957
1	29736874	29736875	.	1000	+	5.000000	5.000000	29736874	29736875	14.29180	29736874	29736875	9.00957
3	14202378	14202379	.	1000	+	5.000000	5.000000	14202378	14202379	9.82368	14202378	14202379	13.41300
1	29736872	29736873	.	1000	+	5.000000	5.000000	29736872	29736873	14.29180	29736872	29736873	8.89621
4	1441800	1441801	.	1000	+	5.000000	5.000000	1441800	1441801	14.27330	1441800	1441801	8.89621
2	9395	9396	.	1000	+	5.000000	5.000000	9395	9396	11.25520	9395	9396	11.82320
3	20339665	20339666	.	1000	-	5.000000	5.000000	20339665	20339666	14.29180	20339665	20339666	8.78278
4	17831816	17831817	.	1000	-	5.000000	5.000000	17831816	17831817	14.29180	17831816	17831817	8.78278
Pt	133868	133869	.	1000	-	5.000000	5.000000	133868	133869	13.34070	133868	133869	9.68813
3	14192957	14192958	.	1000	+	5.000000	5.000000	14192957	14192958	11.49280	14192957	14192958	11.48700
2	1966267	1966268	.	1000	+	5.000000	5.000000	1966267	1966268	14.29180	1966267	1966268	8.66926
Pt	105131	105132	.	1000	+	5.000000	5.000000	105131	105132	12.66990	105131	105132	10.25170
2	9820964	9820965	.	1000	-	5.000000	5.000000	9820964	9820965	14.29180	9820964	9820965	8.55565
3	4824039	4824040	.	1000	+	5.000000	5.000000	4824039	4824040	14.29180	4824039	4824040	8.55565
4	17831817	17831818	.	1000	-	5.000000	5.000000	17831817	17831818	14.29180	17831817	17831818	8.55565
1	29830852	29830853	.	1000	+	5.000000	5.000000	29830852	29830853	14.25560	29830852	29830853	8.55565
4	1441813	1441814	.	1000	+	5.000000	5.000000	1441813	1441814	14.02010	1441813	1441814	8.78278
3	22747098	22747099	.	1000	+	5.000000	5.000000	22747098	22747099	13.89010	22747098	22747099	8.89621
5	6851607	6851608	.	1000	-	5.000000	5.000000	6851607	6851608	14.11570	6851607	6851608	8.66926
Pt	133952	133953	.	1000	-	5.000000	5.000000	133952	133953	13.54470	133952	133953	9.23605
2	4568	4569	.	1000	+	5.000000	5.000000	4568	4569	8.38159	4568	4569	14.36350
3	14203366	14203367	.	1000	+	5.000000	5.000000	14203366	14203367	11.25520	14203366	14203367	11.48700
1	28354728	28354729	.	1000	-	5.000000	5.000000	28354728	28354729	14.29180	28354728	28354729	8.44196
3	22747129	22747130	.	1000	+	5.000000	5.000000	22747129	22747130	14.29180	22747129	22747130	8.44196
Pt	104695	104696	.	1000	+	5.000000	5.000000	104695	104696	13.54470	104695	104696	9.12284
3	14200125	14200126	.	1000	+	5.000000	5.000000	14200125	14200126	11.73000	14200125	14200126	10.92620
2	4712	4713	.	1000	+	5.000000	5.000000	4712	4713	8.86363	4712	4713	13.78140
1	29736808	29736809	.	1000	+	5.000000	5.000000	29736808	29736809	14.29180	29736808	29736809	8.32818
4	7522584	7522585	.	1000	+	5.000000	5.000000	7522584	7522585	14.29180	7522584	7522585	8.32818
1	29736863	29736864	.	1000	+	5.000000	5.000000	29736863	29736864	12.89960	29736863	29736864	9.68813
5	16905152	16905153	.	1000	+	5.000000	5.000000	16905152	16905153	14.25560	16905152	16905153	8.32818
5	26290031	26290032	.	1000	-	5.000000	5.000000	26290031	26290032	14.25560	26290031	26290032	8.32818
Pt	104779	104780	.	1000	+	5.000000	5.000000	104779	104780	13.34070	104779	104780	9.23605
2	6669	6670	.	1000	+	5.000000	5.000000	6669	6670	14.02010	6669	6670	8.55565
3	14200640	14200641	.	1000	+	5.000000	5.000000	14200640	14200641	14.02010	14200640	14200641	8.55565
3	14202400	14202401	.	1000	+	5.000000	5.000000	14202400	14202401	10.30190	14202400	14202401	12.27160
3	14198683	14198684	.	1000	+	5.000000	5.000000	14198683	14198684	8.62279	14198683	14198684	13.91320
4	7522545	7522546	.	1000	+	5.000000	5.000000	7522545	7522546	13.72930	7522545	7522546	8.78278
3	22747123	22747124	.	1000	+	5.000000	5.000000	22747123	22747124	14.28250	22747123	22747124	8.21430
3	5669605	5669606	.	1000	-	5.000000	5.000000	5669605	5669606	14.27330	5669605	5669606	8.21430
2	8429	8430	.	1000	+	5.000000	5.000000	8429	8430	10.54070	8429	8430	11.93520
3	14198539	14198540	.	1000	+	5.000000	5.000000	14198539	14198540	8.38159	14198539	14198540	14.05150
5	15378351	15378352	.	1000	-	5.000000	5.000000	15378351	15378352	14.29180	15378351	15378352	8.10033
5	15378356	15378357	.	1000	-	5.000000	5.000000	15378356	15378357	14.29180	15378356	15378357	8.10033
3	22745696	22745697	.	1000	+	5.000000	5.000000	22745696	22745697	14.28250	22745696	22745697	8.10033
2	6672	6673	.	1000	+	5.000000	5.000000	6672	6673	10.77910	6672	6673	11.59900
5	20778249	20778250	.	1000	-	5.000000	5.000000	20778249	20778250	14.25560	20778249	20778250	8.10033
4	1441795	1441796	.	1000	+	5.000000	5.000000	1441795	1441796	14.23030	1441795	1441796	8.10033
5	651867	651868	.	1000	+	5.000000	5.000000	651867	651868	14.11570	651867	651868	8.21430
2	6154	6155	.	1000	+	5.000000	5.000000	6154	6155	11.73000	6154	6155	10.58920
3	19506784	19506785	.	1000	+	5.000000	5.000000	19506784	19506785	14.29180	19506784	19506785	7.98626
5	21632654	21632655	.	1000	-	5.000000	5.000000	21632654	21632655	14.29180	21632654	21632655	7.98626
3	14200643	14200644	.	1000	+	5.000000	5.000000	14200643	14200644	10.77910	14200643	14200644	11.48700
3	5669604	5669605	.	1000	-	5.000000	5.000000	5669604	5669605	14.27330	5669604	5669605	7.98626
4	1441797	1441798	.	1000	+	5.000000	5.000000	1441797	1441798	14.25560	1441797	1441798	7.98626
3	5669545	5669546	.	1000	-	5.000000	5.000000	5669545	5669546	13.34070	5669545	5669546	8.89621
Pt	107947	107948	.	1000	+	5.000000	5.000000	107947	107948	12.20250	107947	107948	10.02650
Pt	133516	133517	.	1000	-	5.000000	5.000000	133516	133517	12.20250	133516	133517	10.02650
3	20339650	20339651	.	1000	-	5.000000	5.000000	20339650	20339651	14.23030	20339650	20339651	7.98626
4	17483213	17483214	.	1000	+	5.000000	5.000000	17483213	17483214	14.23030	17483213	17483214	7.98626
2	8915	8916	.	1000	+	5.000000	5.000000	8915	8916	11.01730	8915	8916	11.15060
3	14202886	14202887	.	1000	+	5.000000	5.000000	14202886	14202887	11.01730	14202886	14202887	11.15060
2	9068	9069	.	1000	+	5.000000	5.000000	9068	9069	9.10412	9068	9069	13.06310
3	14203039	14203040	.	1000	+	5.000000	5.000000	14203039	14203040	9.10412	14203039	14203040	13.06310
2	13019169	13019170	.	1000	-	5.000000	5.000000	13019169	13019170	14.29180	13019169	13019170	7.87209
4	2672041	2672042	.	1000	-	5.000000	5.000000	2672041	2672042	14.29180	2672041	2672042	7.87209
2	13019218	13019219	.	1000	-	5.000000	5.000000	13019218	13019219	14.28250	13019218	13019219	7.87209
4	7522574	7522575	.	1000	+	5.000000	5.000000	7522574	7522575	13.12400	7522574	7522575	9.00957
Pt	130700	130701	.	1000	-	5.000000	5.000000	130700	130701	12.20250	130700	130701	9.91376
1	28272780	28272781	.	1000	+	5.000000	5.000000	28272780	28272781	13.72930	28272780	28272781	8.32818
3	22747103	22747104	.	1000	+	5.000000	5.000000	22747103	22747104	14.29180	22747103	22747104	7.75781
3	22747131	22747132	.	1000	+	5.000000	5.000000	22747131	22747132	14.29180	22747131	22747132	7.75781
1	29736849	29736850	.	1000	+	5.000000	5.000000	29736849	29736850	13.12400	29736849	29736850	8.89621
3	5669560	5669561	.	1000	-	5.000000	5.000000	5669560	5669561	14.02010	5669560	5669561	7.98626
3	364058	364059	.	1000	-	5.000000	5.000000	364058	364059	14.23030	364058	364059	7.75781
3	23053623	23053624	.	1000	+	5.000000	5.000000	23053623	23053624	14.11570	23053623	23053624	7.87209
1	23835354	23835355	.	1000	+	5.000000	5.000000	23835354	23835355	13.54470	23835354	23835355	8.44196
1	25263724	25263725	.	1000	+	5.000000	5.000000	25263724	25263725	14.29180	25263724	25263725	7.64343
4	18085505	18085506	.	1000	+	5.000000	5.000000	18085505	18085506	14.29180	18085505	18085506	7.64343
5	21632653	21632654	.	1000	-	5.000000	5.000000	21632653	21632654	14.29180	21632653	21632654	7.64343
1	10723060	10723061	.	1000	+	5.000000	5.000000	10723060	10723061	13.12400	10723060	10723061	8.78278
1	7056110	7056111	.	1000	+	5.000000	5.000000	7056110	7056111	14.11570	7056110	7056111	7.75781
1	29830851	29830852	.	1000	+	5.000000	5.000000	29830851	29830852	14.29180	29830851	29830852	7.52893
2	14523561	14523562	.	1000	-	5.000000	5.000000	14523561	14523562	14.29180	14523561	14523562	7.52893
3	22747104	22747105	.	1000	+	5.000000	5.000000	22747104	22747105	14.29180	22747104	22747105	7.52893
4	1441812	1441813	.	1000	+	5.000000	5.000000	1441812	1441813	14.29180	1441812	1441813	7.52893
5	11849334	11849335	.	1000	+	5.000000	5.000000	11849334	11849335	12.43710	11849334	11849335	9.34917
1	2049259	2049260	.	1000	+	5.000000	5.000000	2049259	2049260	14.23030	2049259	2049260	7.52893
2	6862	6863	.	1000	+	5.000000	5.000000	6862	6863	11.49280	6862	6863	10.25170
3	14200833	14200834	.	1000	+	5.000000	5.000000	14200833	14200834	11.49280	14200833	14200834	10.25170
2	18244970	18244971	.	1000	+	5.000000	5.000000	18244970	18244971	14.18370	18244970	18244971	7.52893
4	17831818	17831819	.	1000	-	5.000000	5.000000	17831818	17831819	14.18370	17831818	17831819	7.52893
2	1824391	1824392	.	1000	-	5.000000	5.000000	1824391	1824392	14.29180	1824391	1824392	7.41431
2	14532778	14532779	.	1000	-	5.000000	5.000000	14532778	14532779	14.29180	14532778	14532779	7.41431
3	3674033	3674034	.	1000	+	5.000000	5.000000	3674033	3674034	14.29180	3674033	3674034	7.41431
3	22747120	22747121	.	1000	+	5.000000	5.000000	22747120	22747121	14.29180	22747120	22747121	7.41431
1	29736868	29736869	.	1000	+	5.000000	5.000000	29736868	29736869	13.89010	29736868	29736869	7.75781
1	26191169	26191170	.	1000	+	5.000000	5.000000	26191169	26191170	14.29180	26191169	26191170	7.29958
1	607968	607969	.	1000	-	5.000000	5.000000	607968	607969	14.29180	607968	607969	7.29958
3	2917996	2917997	.	1000	+	5.000000	5.000000	2917996	2917997	14.29180	2917996	2917997	7.29958
3	22747130	22747131	.	1000	+	5.000000	5.000000	22747130	22747131	14.27330	22747130	22747131	7.29958
3	20339622	20339623	.	1000	-	5.000000	5.000000	20339622	20339623	14.27330	20339622	20339623	7.29958
5	25988134	25988135	.	1000	-	5.000000	5.000000	25988134	25988135	14.27330	25988134	25988135	7.29958
1	29736870	29736871	.	1000	+	5.000000	5.000000	29736870	29736871	13.12400	29736870	29736871	8.44196
2	8241	8242	.	1000	+	5.000000	5.000000	8241	8242	10.30190	8241	8242	11.26280
4	17831814	17831815	.	1000	-	5.000000	5.000000	17831814	17831815	14.25560	17831814	17831815	7.29958
2	8657	8658	.	1000	+	5.000000	5.000000	8657	8658	9.82368	8657	8658	11.71110
2	16570867	16570868	.	1000	-	5.000000	5.000000	16570867	16570868	14.11570	16570867	16570868	7.41431
3	5468603	5468604	.	1000	-	5.000000	5.000000	5468603	5468604	14.29180	5468603	5468604	7.18472
2	15634687	15634688	.	1000	-	5.000000	5.000000	15634687	15634688	14.25560	15634687	15634688	7.18472
2	8737686	8737687	.	1000	+	5.000000	5.000000	8737686	8737687	11.01730	8737686	8737687	10.36430
2	16337215	16337216	.	1000	-	5.000000	5.000000	16337215	16337216	14.29180	16337215	16337216	7.06974
2	16570842	16570843	.	1000	-	5.000000	5.000000	16570842	16570843	14.29180	16570842	16570843	7.06974
3	9796961	9796962	.	1000	+	5.000000	5.000000	9796961	9796962	14.29180	9796961	9796962	7.06974
5	534497	534498	.	1000	+	5.000000	5.000000	534497	534498	14.29180	534497	534498	7.06974
2	4711	4712	.	1000	+	5.000000	5.000000	4711	4712	8.62279	4711	4712	12.72180
3	20339652	20339653	.	1000	-	5.000000	5.000000	20339652	20339653	13.34070	20339652	20339653	7.98626
3	14202212	14202213	.	1000	+	5.000000	5.000000	14202212	14202213	10.06290	14202212	14202213	11.26280
3	4820873	4820874	.	1000	+	5.000000	5.000000	4820873	4820874	14.11570	4820873	4820874	7.18472
3	14202628	14202629	.	1000	+	5.000000	5.000000	14202628	14202629	9.58413	14202628	14202629	11.71110
1	18986508	18986509	.	1000	+	5.000000	5.000000	18986508	18986509	11.01730	18986508	18986509	10.25170
3	14202395	14202396	.	1000	+	5.000000	5.000000	14202395	14202396	8.86363	14202395	14202396	12.38390
1	29736861	29736862	.	1000	+	5.000000	5.000000	29736861	29736862	13.34070	29736861	29736862	7.87209
4	7522544	7522545	.	1000	+	5.000000	5.000000	7522544	7522545	12.20250	7522544	7522545	9.00957
2	6792	6793	.	1000	+	5.000000	5.000000	6792	6793	11.73000	6792	6793	9.46223
1	8268625	8268626	.	1000	-	5.000000	5.000000	8268625	8268626	14.18370	8268625	8268626	6.95462
2	8424	8425	.	1000	+	5.000000	5.000000	8424	8425	8.86363	8424	8425	12.27160
3	23053671	23053672	.	1000	+	5.000000	5.000000	23053671	23053672	14.29180	23053671	23053672	6.83936
5	21632723	21632724	.	1000	-	5.000000	5.000000	21632723	21632724	14.29180	21632723	21632724	6.83936
1	17498483	17498484	.	1000	-	5.000000	5.000000	17498483	17498484	10.54070	17498483	17498484	10.58920
3	5669608	5669609	.	1000	-	5.000000	5.000000	5669608	5669609	13.34070	5669608	5669609	7.75781
5	2993530	2993531	.	1000	-	5.000000	5.000000	2993530	2993531	14.25560	2993530	2993531	6.83936
3	9796930	9796931	.	1000	+	5.000000	5.000000	9796930	9796931	14.23030	9796930	9796931	6.83936
5	3111061	3111062	.	1000	-	5.000000	5.000000	3111061	3111062	11.01730	3111061	3111062	10.02650
4	7945657	7945658	.	1000	+	5.000000	5.000000	7945657	7945658	13.72930	7945657	7945658	7.29958
5	24683708	24683709	.	1000	-	5.000000	5.000000	24683708	24683709	14.18370	24683708	24683709	6.83936
2	8026	8027	.	1000	+	5.000000	5.000000	8026	8027	8.86363	8026	8027	12.15940
3	2917978	2917979	.	1000	+	5.000000	5.000000	2917978	2917979	14.29180	2917978	2917979	6.72396
5	8343775	8343776	.	1000	+	5.000000	5.000000	8343775	8343776	14.29180	8343775	8343776	6.72396
1	10723061	10723062	.	1000	+	5.000000	5.000000	10723061	10723062	12.89960	10723061	10723062	8.10033
2	13019226	13019227	.	1000	-	5.000000	5.000000	13019226	13019227	12.66990	13019226	13019227	8.32818
4	17831825	17831826	.	1000	-	5.000000	5.000000	17831825	17831826	13.12400	17831825	17831826	7.87209
5	20097973	20097974	.	1000	-	5.000000	5.000000	20097973	20097974	13.12400	20097973	20097974	7.87209
2	11270814	11270815	.	1000	+	5.000000	5.000000	11270814	11270815	13.34070	11270814	11270815	7.64343
5	210282	210283	.	1000	+	5.000000	5.000000	210282	210283	13.34070	210282	210283	7.64343
2	9390	9391	.	1000	+	5.000000	5.000000	9390	9391	11.73000	9390	9391	9.23605
3	14192952	14192953	.	1000	+	5.000000	5.000000	14192952	14192953	11.73000	14192952	14192953	9.23605
3	14203361	14203362	.	1000	+	5.000000	5.000000	14203361	14203362	11.73000	14203361	14203362	9.23605
1	3867725	3867726	.	1000	-	5.000000	5.000000	3867725	3867726	14.11570	3867725	3867726	6.83936
3	7376675	7376676	.	1000	-	5.000000	5.000000	7376675	7376676	14.11570	7376675	7376676	6.83936
3	14198538	14198539	.	1000	+	5.000000	5.000000	14198538	14198539	9.34428	14198538	14198539	11.59900
1	8268655	8268656	.	1000	-	5.000000	5.000000	8268655	8268656	14.18370	8268655	8268656	6.72396
3	2917989	2917990	.	1000	+	5.000000	5.000000	2917989	2917990	14.29180	2917989	2917990	6.60842
3	14202685	14202686	.	1000	+	5.000000	5.000000	14202685	14202686	10.30190	14202685	14202686	10.58920
1	10723085	10723086	.	1000	+	5.000000	5.000000	10723085	10723086	12.43710	10723085	10723086	8.44196
3	14200763	14200764	.	1000	+	5.000000	5.000000	14200763	14200764	11.96660	14200763	14200764	8.89621
2	13177142	13177143	.	1000	+	5.000000	5.000000	13177142	13177143	14.02010	13177142	13177143	6.83936
3	22747113	22747114	.	1000	+	5.000000	5.000000	22747113	22747114	13.89010	22747113	22747114	6.95462
4	16692822	16692823	.	1000	+	5.000000	5.000000	16692822	16692823	13.89010	16692822	16692823	6.95462
3	14192951	14192952	.	1000	+	5.000000	5.000000	14192951	14192952	11.01730	14192951	14192952	9.80098
2	8236	8237	.	1000	+	5.000000	5.000000	8236	8237	9.10412	8236	8237	11.71110
2	7417	7418	.	1000	+	5.000000	5.000000	7417	7418	10.77910	7417	7418	10.02650
2	9087	9088	.	1000	+	5.000000	5.000000	9087	9088	10.54070	9087	9088	10.25170
3	22747106	22747107	.	1000	+	5.000000	5.000000	22747106	22747107	14.29180	22747106	22747107	6.49272
3	22747133	22747134	.	1000	+	5.000000	5.000000	22747133	22747134	14.29180	22747133	22747134	6.49272
5	21632655	21632656	.	1000	-	5.000000	5.000000	21632655	21632656	14.29180	21632655	21632656	6.49272
3	14201997	14201998	.	1000	+	5.000000	5.000000	14201997	14201998	8.62279	14201997	14201998	12.15940
2	8714	8715	.	1000	+	5.000000	5.000000	8714	8715	10.30190	8714	8715	10.47680
3	14749424	14749425	.	1000	-	5.000000	5.000000	14749424	14749425	14.28250	14749424	14749425	6.49272
1	2408319	2408320	.	1000	-	5.000000	5.000000	2408319	2408320	12.89960	2408319	2408320	7.87209
5	3284351	3284352	.	1000	-	5.000000	5.000000	3284351	3284352	13.12400	3284351	3284352	7.64343
4	7522551	7522552	.	1000	+	5.000000	5.000000	7522551	7522552	11.96660	7522551	7522552	8.78278
4	12009381	12009382	.	1000	+	5.000000	5.000000	12009381	12009382	14.02010	12009381	12009382	6.72396
4	6408815	6408816	.	1000	+	5.000000	5.000000	6408815	6408816	14.11570	6408815	6408816	6.60842
2	9389	9390	.	1000	+	5.000000	5.000000	9389	9390	11.01730	9389	9390	9.68813
3	14202207	14202208	.	1000	+	5.000000	5.000000	14202207	14202208	9.10412	14202207	14202208	11.59900
3	14198682	14198683	.	1000	+	5.000000	5.000000	14198682	14198683	8.86363	14198682	14198683	11.82320
3	14201388	14201389	.	1000	+	5.000000	5.000000	14201388	14201389	10.54070	14201388	14201389	10.13910
3	17493487	17493488	.	1000	-	5.000000	5.000000	17493487	17493488	14.29180	17493487	17493488	6.37686
4	18163628	18163629	.	1000	-	5.000000	5.000000	18163628	18163629	14.29180	18163628	18163629	6.37686
5	4762509	4762510	.	1000	+	5.000000	5.000000	4762509	4762510	14.29180	4762509	4762510	6.37686
5	4935037	4935038	.	1000	-	5.000000	5.000000	4935037	4935038	14.29180	4935037	4935038	6.37686
2	9397	9398	.	1000	+	5.000000	5.000000	9397	9398	10.30190	9397	9398	10.36430
3	14192959	14192960	.	1000	+	5.000000	5.000000	14192959	14192960	10.30190	14192959	14192960	10.36430
3	14203368	14203369	.	1000	+	5.000000	5.000000	14203368	14203369	10.30190	14203368	14203369	10.36430
Pt	105636	105637	.	1000	+	5.000000	5.000000	105636	105637	10.30190	105636	105637	10.36430
Pt	133011	133012	.	1000	-	5.000000	5.000000	133011	133012	10.30190	133011	133012	10.36430
3	2823326	2823327	.	1000	-	5.000000	5.000000	2823326	2823327	14.27330	2823326	2823327	6.37686
Pt	105157	105158	.	1000	+	5.000000	5.000000	105157	105158	11.96660	105157	105158	8.66926
Pt	133490	133491	.	1000	-	5.000000	5.000000	133490	133491	11.96660	133490	133491	8.66926
5	20715651	20715652	.	1000	-	5.000000	5.000000	20715651	20715652	14.02010	20715651	20715652	6.60842
3	5669611	5669612	.	1000	-	5.000000	5.000000	5669611	5669612	11.73000	5669611	5669612	8.89621
2	16570883	16570884	.	1000	-	5.000000	5.000000	16570883	16570884	13.89010	16570883	16570884	6.72396
5	26062584	26062585	.	1000	+	5.000000	5.000000	26062584	26062585	13.89010	26062584	26062585	6.72396
2	3778	3779	.	1000	+	5.000000	5.000000	3778	3779	9.10412	3778	3779	11.48700
3	14203360	14203361	.	1000	+	5.000000	5.000000	14203360	14203361	10.77910	14203360	14203361	9.80098
1	23830635	23830636	.	1000	+	5.000000	5.000000	23830635	23830636	13.72930	23830635	23830636	6.83936
3	14203058	14203059	.	1000	+	5.000000	5.000000	14203058	14203059	10.54070	14203058	14203059	10.02650
1	29736867	29736868	.	1000	+	5.000000	5.000000	29736867	29736868	11.96660	29736867	29736868	8.55565
3	22612730	22612731	.	1000	+	5.000000	5.000000	22612730	22612731	13.54470	22612730	22612731	6.95462
2	15320907	15320908	.	1000	-	5.000000	5.000000	15320907	15320908	13.89010	15320907	15320908	6.60842
2	4567	4568	.	1000	+	5.000000	5.000000	4567	4568	9.34428	4567	4568	11.15060
2	4703	4704	.	1000	+	5.000000	5.000000	4703	4704	9.34428	4703	4704	11.15060
5	15378348	15378349	.	1000	-	5.000000	5.000000	15378348	15378349	14.23030	15378348	15378349	6.26083
3	14197749	14197750	.	1000	+	5.000000	5.000000	14197749	14197750	9.10412	14197749	14197750	11.37490
3	14200507	14200508	.	1000	+	5.000000	5.000000	14200507	14200508	8.62279	14200507	14200508	11.82320
2	16570816	16570817	.	1000	-	5.000000	5.000000	16570816	16570817	14.29180	16570816	16570817	6.14463
3	2917988	2917989	.	1000	+	5.000000	5.000000	2917988	2917989	14.29180	2917988	2917989	6.14463
3	5566763	5566764	.	1000	-	5.000000	5.000000	5566763	5566764	14.29180	5566763	5566764	6.14463
4	12871134	12871135	.	1000	+	5.000000	5.000000	12871134	12871135	14.29180	12871134	12871135	6.14463
4	1441794	1441795	.	1000	+	5.000000	5.000000	1441794	1441795	12.66990	1441794	1441795	7.75781
1	10723067	10723068	.	1000	+	5.000000	5.000000	10723067	10723068	13.12400	10723067	10723068	7.29958
3	23053639	23053640	.	1000	+	5.000000	5.000000	23053639	23053640	11.96660	23053639	23053640	8.44196
Pt	133514	133515	.	1000	-	5.000000	5.000000	133514	133515	11.96660	133514	133515	8.44196
3	14200147	14200148	.	1000	+	5.000000	5.000000	14200147	14200148	11.73000	14200147	14200148	8.66926
3	14198684	14198685	.	1000	+	5.000000	5.000000	14198684	14198685	7.16917	14198684	14198685	13.17860
2	6536	6537	.	1000	+	5.000000	5.000000	6536	6537	8.62279	6536	6537	11.71110
2	6641	6642	.	1000	+	5.000000	5.000000	6641	6642	10.30190	6641	6642	10.02650
3	2917987	2917988	.	1000	+	4.981592	5.000000	2917987	2917988	14.29180	2917987	2917988	6.02825
3	4824011	4824012	.	1000	+	5.000000	5.000000	4824011	4824012	14.29180	4824011	4824012	6.02825
3	22747121	22747122	.	1000	+	4.995524	5.000000	22747121	22747122	14.29180	22747121	22747122	6.02825
5	26570137	26570138	.	1000	+	5.000000	5.000000	26570137	26570138	13.12400	26570137	26570138	7.18472
1	10723063	10723064	.	1000	+	5.000000	5.000000	10723063	10723064	12.20250	10723063	10723064	8.10033
1	10473298	10473299	.	1000	-	5.000000	5.000000	10473298	10473299	13.34070	10473298	10473299	6.95462
1	10478963	10478964	.	1000	+	5.000000	5.000000	10478963	10478964	11.96660	10478963	10478964	8.32818
1	11534505	11534506	.	1000	+	4.971258	5.000000	11534505	11534506	14.02010	11534505	11534506	6.26083
3	14198674	14198675	.	1000	+	5.000000	5.000000	14198674	14198675	9.34428	14198674	14198675	10.92620
3	5468622	5468623	.	1000	-	5.000000	5.000000	5468622	5468623	13.54470	5468622	5468623	6.72396
4	1229919	1229920	.	1000	-	5.000000	5.000000	1229919	1229920	13.54470	1229919	1229920	6.72396
2	4713	4714	.	1000	+	5.000000	5.000000	4713	4714	7.16917	4713	4714	13.06310
2	8535	8536	.	1000	+	5.000000	5.000000	8535	8536	8.62279	8535	8536	11.59900
3	14202506	14202507	.	1000	+	5.000000	5.000000	14202506	14202507	8.62279	14202506	14202507	11.59900
1	11410999	11411000	.	1000	-	5.000000	5.000000	11410999	11411000	14.29180	11410999	11411000	5.91168
3	2917990	2917991	.	1000	+	5.000000	5.000000	2917990	2917991	14.29180	2917990	2917991	5.91168
4	8572409	8572410	.	1000	+	5.000000	5.000000	8572409	8572410	14.29180	8572409	8572410	5.91168
3	14200504	14200505	.	1000	+	5.000000	5.000000	14200504	14200505	10.06290	14200504	14200505	10.13910
5	16609241	16609242	.	1000	-	4.937687	5.000000	16609241	16609242	14.28250	16609241	16609242	5.91168
2	5241	5242	.	1000	+	5.000000	5.000000	5241	5242	8.13999	5241	5242	12.04730
3	14199212	14199213	.	1000	+	5.000000	5.000000	14199212	14199213	8.13999	14199212	14199213	12.04730
3	22975199	22975200	.	1000	+	4.971689	5.000000	22975199	22975200	14.02010	22975199	22975200	6.14463
3	14200126	14200127	.	1000	+	5.000000	5.000000	14200126	14200127	11.49280	14200126	14200127	8.66926
1	22397112	22397113	.	1000	+	5.000000	5.000000	22397112	22397113	13.54470	22397112	22397113	6.60842
3	20340987	20340988	.	1000	-	4.998004	5.000000	20340987	20340988	13.89010	20340987	20340988	6.26083
3	22747099	22747100	.	1000	+	4.913909	5.000000	22747099	22747100	14.11570	22747099	22747100	6.02825
1	25263723	25263724	.	1000	+	5.000000	5.000000	25263723	25263724	13.72930	25263723	25263724	6.37686
4	1441796	1441797	.	1000	+	4.987314	5.000000	1441796	1441797	13.72930	1441796	1441797	6.37686
3	14200612	14200613	.	1000	+	5.000000	5.000000	14200612	14200613	10.30190	14200612	14200613	9.80098
2	10327180	10327181	.	1000	-	4.984815	5.000000	10327180	10327181	14.29180	10327180	10327181	5.79491
4	13594056	13594057	.	1000	-	5.000000	5.000000	13594056	13594057	12.89960	13594056	13594057	7.18472
5	18700387	18700388	.	1000	+	5.000000	5.000000	18700387	18700388	11.96660	18700387	18700388	8.10033
2	16570888	16570889	.	1000	-	5.000000	5.000000	16570888	16570889	13.34070	16570888	16570889	6.72396
1	29346949	29346950	.	1000	+	4.925819	5.000000	29346949	29346950	14.02010	29346949	29346950	6.02825
4	15057181	15057182	.	1000	-	4.877190	5.000000	15057181	15057182	14.23030	15057181	15057182	5.79491
3	14198509	14198510	.	1000	+	5.000000	5.000000	14198509	14198510	8.38159	14198509	14198510	11.59900
2	6533	6534	.	1000	+	5.000000	5.000000	6533	6534	10.06290	6533	6534	9.91376
4	9714343	9714344	.	1000	-	5.000000	5.000000	9714343	9714344	14.29180	9714343	9714344	5.67794
5	3284291	3284292	.	1000	-	5.000000	5.000000	3284291	3284292	12.66990	3284291	3284292	7.29958
4	2672026	2672027	.	1000	-	5.000000	5.000000	2672026	2672027	11.49280	2672026	2672027	8.44196
3	14202542	14202543	.	1000	+	5.000000	5.000000	14202542	14202543	7.65553	14202542	14202543	12.27160
2	8737692	8737693	.	1000	+	5.000000	5.000000	8737692	8737693	10.54070	8737692	8737693	9.34917
3	1622910	1622911	.	1000	+	4.941664	5.000000	1622910	1622911	13.72930	1622910	1622911	6.14463
1	29736854	29736855	.	1000	+	5.000000	5.000000	29736854	29736855	10.06290	29736854	29736855	9.80098
1	20968146	20968147	.	1000	-	5.000000	5.000000	20968146	20968147	11.96660	20968146	20968147	7.87209
5	21632701	21632702	.	1000	-	5.000000	5.000000	21632701	21632702	11.73000	21632701	21632702	8.10033
2	6155	6156	.	1000	+	5.000000	5.000000	6155	6156	11.49280	6155	6156	8.32818
3	5669592	5669593	.	1000	-	4.783831	5.000000	5669592	5669593	14.25560	5669592	5669593	5.56075
Pt	136720	136721	.	1000	-	5.000000	5.000000	136720	136721	9.10412	136720	136721	10.70160
2	8571	8572	.	1000	+	5.000000	5.000000	8571	8572	7.41260	8571	8572	12.38390
2	4538	4539	.	1000	+	5.000000	5.000000	4538	4539	8.13999	4538	4539	11.59900
2	19244995	19244996	.	1000	+	5.000000	5.000000	19244995	19244996	12.89960	19244995	19244996	6.83936
1	8268652	8268653	.	1000	-	4.834987	5.000000	8268652	8268653	14.29180	8268652	8268653	5.44334
2	1800386	1800387	.	1000	-	4.760216	5.000000	1800386	1800387	14.28250	1800386	1800387	5.44334
4	1441809	1441810	.	1000	+	5.000000	5.000000	1441809	1441810	11.96660	1441809	1441810	7.75781
3	5669532	5669533	.	1000	-	4.983996	5.000000	5669532	5669533	13.34070	5669532	5669533	6.37686
2	6176	6177	.	1000	+	5.000000	5.000000	6176	6177	11.73000	6176	6177	7.98626
3	22747102	22747103	.	1000	+	5.000000	5.000000	22747102	22747103	11.25520	22747102	22747103	8.44196
2	132882	132883	.	1000	-	4.910850	5.000000	132882	132883	13.54470	132882	132883	6.14463
5	4762508	4762509	.	1000	+	4.902726	5.000000	4762508	4762509	13.54470	4762508	4762509	6.14463
5	7780533	7780534	.	1000	+	4.923449	5.000000	7780533	7780534	13.54470	7780533	7780534	6.14463
2	8737690	8737691	.	1000	+	5.000000	5.000000	8737690	8737691	11.01730	8737690	8737691	8.66926
5	13973654	13973655	.	1000	+	5.000000	5.000000	13973654	13973655	12.66990	13973654	13973655	6.95462
5	3284364	3284365	.	1000	-	5.000000	5.000000	3284364	3284365	12.66990	3284364	3284365	6.95462
3	5669557	5669558	.	1000	-	5.000000	5.000000	5669557	5669558	12.20250	5669557	5669558	7.41431
3	2917977	2917978	.	1000	+	5.000000	5.000000	2917977	2917978	13.12400	2917977	2917978	6.49272
4	6976013	6976014	.	1000	-	5.000000	5.000000	6976013	6976014	11.96660	6976013	6976014	7.64343
1	29577526	29577527	.	1000	+	4.769405	5.000000	29577526	29577527	14.02010	29577526	29577527	5.56075
3	19913788	19913789	.	1000	-	4.768991	5.000000	19913788	19913789	14.02010	19913788	19913789	5.56075
5	1138347	1138348	.	1000	+	4.766109	5.000000	1138347	1138348	14.02010	1138347	1138348	5.56075
3	23053705	23053706	.	1000	+	4.785894	5.000000	23053705	23053706	13.89010	23053705	23053706	5.67794
Pt	133487	133488	.	1000	-	5.000000	5.000000	133487	133488	10.30190	133487	133488	9.23605
3	14197945	14197946	.	1000	+	5.000000	5.000000	14197945	14197946	6.92519	14197945	14197946	12.60900
2	18244972	18244973	.	1000	+	4.814826	5.000000	18244972	18244973	13.72930	18244972	18244973	5.79491
4	12871123	12871124	.	1000	+	4.814931	5.000000	12871123	12871124	13.72930	12871123	12871124	5.79491
4	16710058	16710059	.	1000	+	4.838016	5.000000	16710058	16710059	13.72930	16710058	16710059	5.79491
4	6409567	6409568	.	1000	+	5.000000	5.000000	6409567	6409568	12.66990	6409567	6409568	6.83936
5	210300	210301	.	1000	+	5.000000	5.000000	210300	210301	12.66990	210300	210301	6.83936
3	22745695	22745696	.	1000	+	5.000000	5.000000	22745695	22745696	12.43710	22745695	22745696	7.06974
3	7376708	7376709	.	1000	-	5.000000	5.000000	7376708	7376709	12.43710	7376708	7376709	7.06974
3	17493505	17493506	.	1000	-	4.952817	5.000000	17493505	17493506	13.12400	17493505	17493506	6.37686
2	5442	5443	.	1000	+	5.000000	5.000000	5442	5443	7.89798	5442	5443	11.59900
3	14193042	14193043	.	1000	+	5.000000	5.000000	14193042	14193043	7.89798	14193042	14193043	11.59900
5	24741490	24741491	.	1000	-	4.594452	4.995589	24741490	24741491	5.12369	24741490	24741491	14.36350
1	17498476	17498477	.	1000	-	5.000000	5.000000	17498476	17498477	10.77910	17498476	17498477	8.66926
4	7522571	7522572	.	1000	+	5.000000	5.000000	7522571	7522572	10.77910	7522571	7522572	8.66926
3	14198932	14198933	.	1000	+	5.000000	5.000000	14198932	14198933	6.92519	14198932	14198933	12.49640
Pt	105160	105161	.	1000	+	5.000000	5.000000	105160	105161	10.06290	105160	105161	9.34917
4	8887467	8887468	.	1000	+	4.795758	5.000000	8887467	8887468	13.72930	8887467	8887468	5.67794
Pt	104833	104834	.	1000	+	5.000000	5.000000	104833	104834	12.66990	104833	104834	6.72396
5	26570138	26570139	.	1000	+	5.000000	5.000000	26570138	26570139	11.96660	26570138	26570139	7.41431
3	195063	195064	.	1000	-	4.862104	5.000000	195063	195064	13.34070	195063	195064	6.02825
Pt	105133	105134	.	1000	+	5.000000	5.000000	105133	105134	11.49280	105133	105134	7.87209
1	29346953	29346954	.	1000	+	4.700790	5.000000	29346953	29346954	14.02010	29346953	29346954	5.32570
3	2917979	2917980	.	1000	+	4.681327	5.000000	2917979	2917980	14.02010	2917979	2917980	5.32570
1	10723058	10723059	.	1000	+	5.000000	5.000000	10723058	10723059	11.01730	10723058	10723059	8.32818
4	7522575	7522576	.	1000	+	5.000000	5.000000	7522575	7522576	11.01730	7522575	7522576	8.32818
4	12871142	12871143	.	1000	+	4.654846	5.000000	12871142	12871143	14.25560	12871142	12871143	5.08965
2	6668	6669	.	1000	+	5.000000	5.000000	6668	6669	10.77910	6668	6669	8.55565
4	7522600	7522601	.	1000	+	4.623918	5.000000	7522600	7522601	14.23030	7522600	7522601	5.08965
4	17831821	17831822	.	1000	-	5.000000	5.000000	17831821	17831822	10.06290	17831821	17831822	9.23605
5	21632660	21632661	.	1000	-	4.746209	5.000000	21632660	21632661	13.72930	21632660	21632661	5.56075
3	5669567	5669568	.	1000	-	5.000000	5.000000	5669567	5669568	9.82368	5669567	5669568	9.46223
3	7377114	7377115	.	1000	-	5.000000	5.000000	7377114	7377115	12.66990	7377114	7377115	6.60842
1	8268684	8268685	.	1000	-	4.965650	5.000000	8268684	8268685	12.89960	8268684	8268685	6.37686
5	13086872	13086873	.	1000	+	4.641664	5.000000	13086872	13086873	14.18370	13086872	13086873	5.08965
1	22397109	22397110	.	1000	+	4.903724	5.000000	22397109	22397110	13.12400	22397109	22397110	6.14463
1	11411020	11411021	.	1000	-	5.000000	5.000000	11411020	11411021	11.96660	11411020	11411021	7.29958
3	22747126	22747127	.	1000	+	5.000000	5.000000	22747126	22747127	11.96660	22747126	22747127	7.29958
3	4820894	4820895	.	1000	+	4.635104	5.000000	4820894	4820895	14.28250	4820894	4820895	4.97122
3	4820909	4820910	.	1000	+	4.824740	5.000000	4820909	4820910	13.34070	4820909	4820910	5.91168
Pt	107950	107951	.	1000	+	5.000000	5.000000	107950	107951	11.25520	107950	107951	7.98626
5	9807476	9807477	.	1000	-	4.632809	5.000000	9807476	9807477	14.02010	9807476	9807477	5.20780
4	17831831	17831832	.	1000	-	4.794013	5.000000	17831831	17831832	13.54470	17831831	17831832	5.67794
2	8534	8535	.	1000	+	5.000000	5.000000	8534	8535	10.77910	8534	8535	8.44196
3	14200639	14200640	.	1000	+	5.000000	5.000000	14200639	14200640	10.77910	14200639	14200640	8.44196
2	3974	3975	.	1000	+	5.000000	5.000000	3974	3975	6.92519	3974	3975	12.27160
4	7522561	7522562	.	1000	+	5.000000	5.000000	7522561	7522562	9.82368	7522561	7522562	9.34917
2	13177120	13177121	.	1000	+	4.989541	5.000000	13177120	13177121	12.66990	13177120	13177121	6.49272
3	22747112	22747113	.	1000	+	5.000000	5.000000	22747112	22747113	12.43710	22747112	22747113	6.72396
3	5669547	5669548	.	1000	-	5.000000	5.000000	5669547	5669548	12.43710	5669547	5669548	6.72396
3	14203451	14203452	.	1000	+	5.000000	5.000000	14203451	14203452	7.89798	14203451	14203452	11.26280
1	19518377	19518378	.	1000	-	4.877758	5.000000	19518377	19518378	13.12400	19518377	19518378	6.02825
4	3990033	3990034	.	1000	-	4.851008	5.000000	3990033	3990034	13.12400	3990033	3990034	6.02825
Pt	133953	133954	.	1000	-	5.000000	5.000000	133953	133954	11.96660	133953	133954	7.18472
3	3674011	3674012	.	1000	+	4.616919	5.000000	3674011	3674012	14.02010	3674011	3674012	5.08965
5	24290773	24290774	.	1000	+	4.625450	5.000000	24290773	24290774	14.02010	24290773	24290774	5.08965
3	22747127	22747128	.	1000	+	5.000000	5.000000	22747127	22747128	10.77910	22747127	22747128	8.32818
4	38211	38212	.	1000	+	4.751087	5.000000	38211	38212	13.54470	38211	38212	5.56075
3	14198939	14198940	.	1000	+	5.000000	5.000000	14198939	14198940	6.68064	14198939	14198940	12.38390
4	12009402	12009403	.	1000	+	4.667440	5.000000	12009402	12009403	13.72930	12009402	12009403	5.32570
3	14202198	14202199	.	1000	+	5.000000	5.000000	14202198	14202199	7.89798	14202198	14202199	11.15060
Pt	133814	133815	.	1000	-	5.000000	5.000000	133814	133815	12.43710	133814	133815	6.60842
5	22184446	22184447	.	1000	+	4.834685	5.000000	22184446	22184447	13.12400	22184446	22184447	5.91168
Pt	101927	101928	.	1000	+	5.000000	5.000000	101927	101928	9.34428	101927	101928	9.68813
3	14202747	14202748	.	1000	+	5.000000	5.000000	14202747	14202748	7.65553	14202747	14202748	11.37490
4	18268752	18268753	.	1000	-	5.000000	5.000000	18268752	18268753	11.73000	18268752	18268753	7.29958
1	16129624	16129625	.	1000	+	5.000000	5.000000	16129624	16129625	11.49280	16129624	16129625	7.52893
1	29736859	29736860	.	1000	+	5.000000	5.000000	29736859	29736860	11.25520	29736859	29736860	7.75781
Pt	130697	130698	.	1000	-	5.000000	5.000000	130697	130698	11.01730	130697	130698	7.98626
5	4762507	4762508	.	1000	+	4.587661	4.986421	4762507	4762508	14.02010	4762507	4762508	4.97122
3	5117485	5117486	.	1000	+	4.692623	5.000000	5117485	5117486	13.54470	5117485	5117486	5.44334
5	659607	659608	.	1000	+	4.714548	5.000000	659607	659608	13.54470	659607	659608	5.44334
1	10475943	10475944	.	1000	-	4.603574	5.000000	10475943	10475944	13.89010	10475943	10475944	5.08965
4	7925135	7925136	.	1000	+	4.603895	5.000000	7925135	7925136	13.89010	7925135	7925136	5.08965
2	9480	9481	.	1000	+	5.000000	5.000000	9480	9481	7.89798	9480	9481	11.03840
3	22747096	22747097	.	1000	+	4.963998	5.000000	22747096	22747097	12.43710	22747096	22747097	6.49272
Pt	104694	104695	.	1000	+	5.000000	5.000000	104694	104695	11.96660	104694	104695	6.95462
5	24683692	24683693	.	1000	-	5.000000	5.000000	24683692	24683693	11.73000	24683692	24683693	7.18472
2	6673	6674	.	1000	+	5.000000	5.000000	6673	6674	10.30190	6673	6674	8.55565
1	29736860	29736861	.	1000	+	5.000000	5.000000	29736860	29736861	10.06290	29736860	29736861	8.78278
Pt	104880	104881	.	1000	+	5.000000	5.000000	104880	104881	10.06290	104880	104881	8.78278
5	17828708	17828709	.	1000	-	4.611287	5.000000	17828708	17828709	13.72930	17828708	17828709	5.08965
1	8268677	8268678	.	1000	-	4.943723	5.000000	8268677	8268678	12.43710	8268677	8268678	6.37686
2	13019217	13019218	.	1000	-	4.932976	5.000000	13019217	13019218	12.43710	13019217	13019218	6.37686
4	17831827	17831828	.	1000	-	4.936666	5.000000	17831827	17831828	12.43710	17831827	17831828	6.37686
1	6079766	6079767	.	1000	-	4.835597	5.000000	6079766	6079767	12.89960	6079766	6079767	5.91168
4	1562497	1562498	.	1000	-	5.000000	5.000000	1562497	1562498	12.20250	1562497	1562498	6.60842
3	14198535	14198536	.	1000	+	5.000000	5.000000	14198535	14198536	7.65553	14198535	14198536	11.15060
5	22248019	22248020	.	1000	+	5.000000	5.000000	22248019	22248020	11.96660	22248019	22248020	6.83936
3	22747097	22747098	.	1000	+	5.000000	5.000000	22747097	22747098	11.49280	22747097	22747098	7.29958
2	4564	4565	.	1000	+	5.000000	5.000000	4564	4565	7.41260	4564	4565	11.37490
2	8737687	8737688	.	1000	+	5.000000	5.000000	8737687	8737688	11.25520	8737687	8737688	7.52893
3	14202505	14202506	.	1000	+	5.000000	5.000000	14202505	14202506	10.77910	14202505	14202506	7.98626
Pt	104808	104809	.	1000	+	5.000000	5.000000	104808	104809	10.77910	104808	104809	7.98626
2	5443	5444	.	1000	+	5.000000	5.000000	5443	5444	8.62279	5443	5444	10.13910
3	14199414	14199415	.	1000	+	5.000000	5.000000	14199414	14199415	8.38159	14199414	14199415	10.36430
2	8729	8730	.	1000	+	5.000000	5.000000	8729	8730	8.13999	8729	8730	10.58920
3	14202700	14202701	.	1000	+	5.000000	5.000000	14202700	14202701	8.13999	14202700	14202701	10.58920
2	6167	6168	.	1000	+	5.000000	5.000000	6167	6168	7.89798	6167	6168	10.81390
2	8227	8228	.	1000	+	5.000000	5.000000	8227	8228	7.89798	8227	8228	10.81390
3	14200138	14200139	.	1000	+	5.000000	5.000000	14200138	14200139	7.89798	14200138	14200139	10.81390
1	16873283	16873284	.	1000	+	4.536055	4.923867	16873283	16873284	13.72930	16873283	16873284	4.97122
3	20339649	20339650	.	1000	-	4.962151	5.000000	20339649	20339650	12.20250	20339649	20339650	6.49272
2	7196	7197	.	1000	+	5.000000	5.000000	7196	7197	9.34428	7196	7197	9.34917
3	4820853	4820854	.	1000	+	5.000000	5.000000	4820853	4820854	11.96660	4820853	4820854	6.72396
5	24282295	24282296	.	1000	+	5.000000	5.000000	24282295	24282296	11.96660	24282295	24282296	6.72396
Pt	133839	133840	.	1000	-	5.000000	5.000000	133839	133840	10.77910	133839	133840	7.87209
3	19913818	19913819	.	1000	-	4.585768	4.984728	19913818	19913819	13.54470	19913818	19913819	5.08965
4	1441822	1441823	.	1000	+	4.590911	4.992121	1441822	1441823	13.54470	1441822	1441823	5.08965
Pt	133767	133768	.	1000	-	5.000000	5.000000	133767	133768	10.06290	133767	133768	8.55565
3	14202373	14202374	.	1000	+	5.000000	5.000000	14202373	14202374	8.13999	14202373	14202374	10.47680
3	14199422	14199423	.	1000	+	5.000000	5.000000	14199422	14199423	7.89798	14199422	14199423	10.70160
2	1800388	1800389	.	1000	-	4.517370	4.904655	1800388	1800389	13.72930	1800388	1800389	4.85251
4	17831829	17831830	.	1000	-	4.870186	5.000000	17831829	17831830	12.43710	17831829	17831830	6.14463
3	14201167	14201168	.	1000	+	5.000000	5.000000	14201167	14201168	9.34428	14201167	14201168	9.23605
Pt	133836	133837	.	1000	-	5.000000	5.000000	133836	133837	9.34428	133836	133837	9.23605
2	8383520	8383521	.	1000	+	4.924588	5.000000	8383520	8383521	12.20250	8383520	8383521	6.37686
4	6408242	6408243	.	1000	+	4.608965	5.000000	6408242	6408243	13.34070	6408242	6408243	5.20780
2	8460	8461	.	1000	+	5.000000	5.000000	8460	8461	8.13999	8460	8461	10.36430
3	14202431	14202432	.	1000	+	5.000000	5.000000	14202431	14202432	8.13999	14202431	14202432	10.36430
2	17459952	17459953	.	1000	-	4.441389	4.829179	17459952	17459953	13.89010	17459952	17459953	4.61415
4	38268	38269	.	1000	+	4.445402	4.835586	38268	38269	13.89010	38268	38269	4.61415
4	15926748	15926749	.	1000	-	4.450479	4.839478	15926748	15926749	13.89010	15926748	15926749	4.61415
1	11534494	11534495	.	1000	+	4.772936	5.000000	11534494	11534495	12.66990	11534494	11534495	5.79491
2	17459928	17459929	.	1000	-	4.479773	4.869575	17459928	17459929	13.72930	17459928	17459929	4.73349
3	14199279	14199280	.	1000	+	4.901881	5.000000	14199279	14199280	6.18958	14199279	14199280	12.27160
5	9807464	9807465	.	1000	-	4.712590	5.000000	9807464	9807465	12.89960	9807464	9807465	5.56075
3	21674683	21674684	.	1000	+	4.994772	5.000000	21674683	21674684	11.73000	21674683	21674684	6.72396
5	210277	210278	.	1000	+	5.000000	5.000000	210277	210278	11.25520	210277	210278	7.18472
5	4935013	4935014	.	1000	-	4.319776	4.719238	4935013	4935014	14.29180	4935013	4935014	4.13319
1	22444514	22444515	.	1000	+	4.273923	4.671701	22444514	22444515	14.28250	22444514	22444515	4.13319
3	22975193	22975194	.	1000	+	5.000000	5.000000	22975193	22975194	10.30190	22975193	22975194	8.10033
3	4820882	4820883	.	1000	+	4.522018	4.907511	4820882	4820883	13.54470	4820882	4820883	4.85251
3	21078325	21078326	.	1000	+	4.367918	4.763977	21078325	21078326	14.02010	21078325	21078326	4.37444
2	8402	8403	.	1000	+	5.000000	5.000000	8402	8403	8.13999	8402	8403	10.25170
Pt	104811	104812	.	1000	+	5.000000	5.000000	104811	104812	9.34428	104811	104812	9.00957
3	19952843	19952844	.	1000	+	4.843160	5.000000	19952843	19952844	12.20250	19952843	19952844	6.14463
5	21632644	21632645	.	1000	-	4.857849	5.000000	21632644	21632645	12.20250	21632644	21632645	6.14463
2	5539368	5539369	.	1000	-	4.904850	5.000000	5539368	5539369	11.96660	5539368	5539369	6.37686
4	17831810	17831811	.	1000	-	4.921331	5.000000	17831810	17831811	11.96660	17831810	17831811	6.37686
4	1441820	1441821	.	1000	+	4.444776	4.835155	1441820	1441821	13.72930	1441820	1441821	4.61415
3	7376674	7376675	.	1000	-	4.679962	5.000000	7376674	7376675	12.89960	7376674	7376675	5.44334
2	4671	4672	.	1000	+	5.000000	5.000000	4671	4672	7.41260	4671	4672	10.92620
4	7522597	7522598	.	1000	+	5.000000	5.000000	7522597	7522598	11.49280	7522597	7522598	6.83936
1	10723068	10723069	.	1000	+	5.000000	5.000000	10723068	10723069	11.25520	10723068	10723069	7.06974
5	9837193	9837194	.	1000	+	5.000000	5.000000	9837193	9837194	11.25520	9837193	9837194	7.06974
3	14197719	14197720	.	1000	+	5.000000	5.000000	14197719	14197720	7.16917	14197719	14197720	11.15060
3	5669590	5669591	.	1000	-	5.000000	5.000000	5669590	5669591	11.01730	5669590	5669591	7.29958
4	10303262	10303263	.	1000	+	4.537583	4.927327	10303262	10303263	13.34070	10303262	10303263	4.97122
4	11335647	11335648	.	1000	+	5.000000	5.000000	11335647	11335648	10.30190	11335647	11335648	7.98626
3	14192958	14192959	.	1000	+	5.000000	5.000000	14192958	14192959	9.82368	14192958	14192959	8.44196
2	8554	8555	.	1000	+	5.000000	5.000000	8554	8555	7.89798	8554	8555	10.36430
2	6166	6167	.	1000	+	5.000000	5.000000	6166	6167	9.58413	6166	6167	8.66926
3	14200137	14200138	.	1000	+	5.000000	5.000000	14200137	14200138	9.58413	14200137	14200138	8.66926
2	16221354	16221355	.	1000	-	4.771029	5.000000	16221354	16221355	12.43710	16221354	16221355	5.79491
3	22747110	22747111	.	1000	+	4.808183	5.000000	22747110	22747111	12.20250	22747110	22747111	6.02825
3	5469471	5469472	.	1000	-	4.804799	5.000000	5469471	5469472	12.20250	5469471	5469472	6.02825
3	12066768	12066769	.	1000	-	4.700491	5.000000	12066768	12066769	12.66990	12066768	12066769	5.56075
3	14198937	14198938	.	1000	+	5.000000	5.000000	14198937	14198938	7.41260	14198937	14198938	10.81390
4	2672025	2672026	.	1000	-	4.959107	5.000000	2672025	2672026	11.49280	2672025	2672026	6.72396
1	24542009	24542010	.	1000	+	4.588841	4.988692	24542009	24542010	13.12400	24542009	24542010	5.08965
2	9128374	9128375	.	1000	-	4.566531	4.957994	9128374	9128375	13.12400	9128374	9128375	5.08965
5	22246594	22246595	.	1000	+	5.000000	5.000000	22246594	22246595	8.86363	22246594	22246595	9.34917
1	16175859	16175860	.	1000	+	5.000000	5.000000	16175859	16175860	11.25520	16175859	16175860	6.95462
4	2672045	2672046	.	1000	-	5.000000	5.000000	2672045	2672046	11.01730	2672045	2672046	7.18472
1	10723059	10723060	.	1000	+	5.000000	5.000000	10723059	10723060	10.77910	10723059	10723060	7.41431
2	5267	5268	.	1000	+	5.000000	5.000000	5267	5268	6.68064	5267	5268	11.48700
3	14199238	14199239	.	1000	+	5.000000	5.000000	14199238	14199239	6.68064	14199238	14199239	11.48700
2	9396	9397	.	1000	+	5.000000	5.000000	9396	9397	9.82368	9396	9397	8.32818
3	14200644	14200645	.	1000	+	5.000000	5.000000	14200644	14200645	9.82368	14200644	14200645	8.32818
3	14203367	14203368	.	1000	+	5.000000	5.000000	14203367	14203368	9.82368	14203367	14203368	8.32818
3	14199413	14199414	.	1000	+	5.000000	5.000000	14199413	14199414	7.65553	14199413	14199414	10.47680
2	4968	4969	.	1000	+	4.886084	5.000000	4968	4969	6.18958	4968	4969	11.93520
1	25495820	25495821	.	1000	+	4.744084	5.000000	25495820	25495821	12.43710	25495820	25495821	5.67794
3	22747114	22747115	.	1000	+	4.734815	5.000000	22747114	22747115	12.43710	22747114	22747115	5.67794
3	14202385	14202386	.	1000	+	5.000000	5.000000	14202385	14202386	7.41260	14202385	14202386	10.70160
2	13019225	13019226	.	1000	-	4.788989	5.000000	13019225	13019226	12.20250	13019225	13019226	5.91168
3	17493483	17493484	.	1000	-	4.779383	5.000000	17493483	17493484	12.20250	17493483	17493484	5.91168
3	3674026	3674027	.	1000	+	4.860537	5.000000	3674026	3674027	11.96660	3674026	3674027	6.14463
1	25495848	25495849	.	1000	+	4.604671	5.000000	25495848	25495849	12.89960	25495848	25495849	5.20780
3	22747079	22747080	.	1000	+	5.000000	5.000000	22747079	22747080	11.01730	22747079	22747080	7.06974
4	1441810	1441811	.	1000	+	5.000000	5.000000	1441810	1441811	11.01730	1441810	1441811	7.06974
Pt	131049	131050	.	1000	-	5.000000	5.000000	131049	131050	11.01730	131049	131050	7.06974
1	10723055	10723056	.	1000	+	5.000000	5.000000	10723055	10723056	10.77910	10723055	10723056	7.29958
1	50189	50190	.	1000	-	4.443570	4.833864	50189	50190	13.34070	50189	50190	4.73349
4	7522559	7522560	.	1000	+	5.000000	5.000000	7522559	7522560	10.54070	7522559	7522560	7.52893
3	5669596	5669597	.	1000	-	5.000000	5.000000	5669596	5669597	10.30190	5669596	5669597	7.75781
3	14202182	14202183	.	1000	+	5.000000	5.000000	14202182	14202183	8.13999	14202182	14202183	9.91376
Pt	105022	105023	.	1000	+	5.000000	5.000000	105022	105023	9.58413	105022	105023	8.44196
2	5828	5829	.	1000	+	5.000000	5.000000	5828	5829	7.65553	5828	5829	10.36430
3	14202525	14202526	.	1000	+	5.000000	5.000000	14202525	14202526	7.65553	14202525	14202526	10.36430
1	10151220	10151221	.	1000	+	4.702554	5.000000	10151220	10151221	12.43710	10151220	10151221	5.56075
2	9755087	9755088	.	1000	-	4.684163	5.000000	9755087	9755088	12.43710	9755087	9755088	5.56075
5	6090135	6090136	.	1000	-	4.676941	5.000000	6090135	6090136	12.43710	6090135	6090136	5.56075
1	5446650	5446651	.	1000	-	4.877300	5.000000	5446650	5446651	11.73000	5446650	5446651	6.26083
2	9820962	9820963	.	1000	-	4.862336	5.000000	9820962	9820963	11.73000	9820962	9820963	6.26083
5	21632755	21632756	.	1000	-	4.865407	5.000000	21632755	21632756	11.73000	21632755	21632756	6.26083
5	693156	693157	.	1000	-	4.560190	4.950673	693156	693157	12.89960	693156	693157	5.08965
2	8393	8394	.	1000	+	5.000000	5.000000	8393	8394	8.86363	8393	8394	9.12284
3	14198642	14198643	.	1000	+	5.000000	5.000000	14198642	14198643	7.16917	14198642	14198643	10.81390
4	2345977	2345978	.	1000	-	4.963622	5.000000	2345977	2345978	11.25520	2345977	2345978	6.72396
3	14202364	14202365	.	1000	+	5.000000	5.000000	14202364	14202365	8.62279	14202364	14202365	9.34917
4	7360416	7360417	.	1000	+	4.998820	5.000000	7360416	7360417	11.01730	7360416	7360417	6.95462
2	4371	4372	.	1000	+	4.735123	5.000000	4371	4372	5.69555	4371	4372	12.27160
1	29736858	29736859	.	1000	+	5.000000	5.000000	29736858	29736859	8.38159	29736858	29736859	9.57521
3	5669549	5669550	.	1000	-	5.000000	5.000000	5669549	5669550	10.54070	5669549	5669550	7.41431
1	29736869	29736870	.	1000	+	5.000000	5.000000	29736869	29736870	9.82368	29736869	29736870	8.10033
3	14200511	14200512	.	1000	+	5.000000	5.000000	14200511	14200512	9.82368	14200511	14200512	8.10033
5	3111063	3111064	.	1000	-	5.000000	5.000000	3111063	3111064	9.58413	3111063	3111064	8.32818
2	5308	5309	.	1000	+	4.925882	5.000000	5308	5309	6.18958	5308	5309	11.71110
2	8414	8415	.	1000	+	5.000000	5.000000	8414	8415	7.41260	8414	8415	10.47680
2	16570890	16570891	.	1000	-	4.727677	5.000000	16570890	16570891	12.20250	16570890	16570891	5.67794
3	4061100	4061101	.	1000	-	4.727075	5.000000	4061100	4061101	12.20250	4061100	4061101	5.67794
1	16129645	16129646	.	1000	+	4.766822	5.000000	16129645	16129646	11.96660	16129645	16129646	5.91168
3	2917981	2917982	.	1000	+	4.805735	5.000000	2917981	2917982	11.73000	2917981	2917982	6.14463
5	16677318	16677319	.	1000	+	4.809885	5.000000	16677318	16677319	11.73000	16677318	16677319	6.14463
1	6152465	6152466	.	1000	-	4.525945	4.910359	6152465	6152466	12.89960	6152465	6152466	4.97122
5	3284327	3284328	.	1000	-	4.864505	5.000000	3284327	3284328	11.49280	3284327	3284328	6.37686
4	12884504	12884505	.	1000	-	4.429090	4.816615	12884504	12884505	13.12400	12884504	12884505	4.73349
1	607967	607968	.	1000	-	4.957941	5.000000	607967	607968	11.01730	607967	607968	6.83936
2	3748	3749	.	1000	+	5.000000	5.000000	3748	3749	6.92519	3748	3749	10.92620
3	14201591	14201592	.	1000	+	5.000000	5.000000	14201591	14201592	8.38159	14201591	14201592	9.46223
5	210311	210312	.	1000	+	5.000000	5.000000	210311	210312	9.82368	210311	210312	7.98626
2	8537	8538	.	1000	+	5.000000	5.000000	8537	8538	7.65553	8537	8538	10.13910
2	5477	5478	.	1000	+	4.467378	4.856554	5477	5478	4.94764	5477	5478	12.83500
3	20339656	20339657	.	1000	-	5.000000	5.000000	20339656	20339657	9.10412	20339656	20339657	8.66926
3	14202202	14202203	.	1000	+	4.798378	5.000000	14202202	14202203	5.94297	14202202	14202203	11.82320
2	16570893	16570894	.	1000	-	4.675354	5.000000	16570893	16570894	12.20250	16570893	16570894	5.56075
2	5852667	5852668	.	1000	+	4.758265	5.000000	5852667	5852668	11.96660	5852667	5852668	5.79491
1	8268683	8268684	.	1000	-	4.542901	4.931831	8268683	8268684	12.66990	8268683	8268684	5.08965
4	1441799	1441800	.	1000	+	4.780497	5.000000	1441799	1441800	11.73000	1441799	1441800	6.02825
3	5468610	5468611	.	1000	-	4.860709	5.000000	5468610	5468611	11.49280	5468610	5468611	6.26083
2	18244971	18244972	.	1000	+	4.898874	5.000000	18244971	18244972	11.25520	18244971	18244972	6.49272
Pt	107598	107599	.	1000	+	4.925852	5.000000	107598	107599	11.01730	107598	107599	6.72396
1	8268680	8268681	.	1000	-	4.210274	4.615331	8268680	8268681	13.72930	8268680	8268681	4.01193
4	8242623	8242624	.	1000	-	4.400356	4.795017	8242623	8242624	13.12400	8242623	8242624	4.61415
1	8268656	8268657	.	1000	-	4.975175	5.000000	8268656	8268657	10.77910	8268656	8268657	6.95462
1	29736888	29736889	.	1000	+	5.000000	5.000000	29736888	29736889	10.54070	29736888	29736889	7.18472
4	9153417	9153418	.	1000	-	5.000000	5.000000	9153417	9153418	9.58413	9153417	9153418	8.10033
3	14202508	14202509	.	1000	+	5.000000	5.000000	14202508	14202509	7.65553	14202508	14202509	10.02650
1	29736822	29736823	.	1000	+	5.000000	5.000000	29736822	29736823	9.34428	29736822	29736823	8.32818
4	17831832	17831833	.	1000	-	5.000000	5.000000	17831832	17831833	8.86363	17831832	17831833	8.78278
2	15634666	15634667	.	1000	-	4.711532	5.000000	15634666	15634667	11.96660	15634666	15634667	5.67794
1	25675498	25675499	.	1000	+	4.754302	5.000000	25675498	25675499	11.73000	25675498	25675499	5.91168
4	12766129	12766130	.	1000	-	4.779616	5.000000	12766129	12766130	11.73000	12766129	12766130	5.91168
5	9807505	9807506	.	1000	-	4.533522	4.919959	9807505	9807506	12.66990	9807505	9807506	4.97122
2	16570860	16570861	.	1000	-	4.807386	5.000000	16570860	16570861	11.49280	16570860	16570861	6.14463
5	2993542	2993543	.	1000	-	4.853705	5.000000	2993542	2993543	11.25520	2993542	2993543	6.37686
3	14198342	14198343	.	1000	+	4.742143	5.000000	14198342	14198343	5.69555	14198342	14198343	11.93520
3	14198118	14198119	.	1000	+	5.000000	5.000000	14198118	14198119	6.92519	14198118	14198119	10.70160
4	7521427	7521428	.	1000	+	4.918052	5.000000	7521427	7521428	11.01730	7521427	7521428	6.60842
1	7042653	7042654	.	1000	-	4.368085	4.764371	7042653	7042654	13.12400	7042653	7042654	4.49447
1	25048431	25048432	.	1000	-	4.946207	5.000000	25048431	25048432	10.77910	25048431	25048432	6.83936
3	18166850	18166851	.	1000	-	4.275562	4.673078	18166850	18166851	13.34070	18166850	18166851	4.25402
3	14203389	14203390	.	1000	+	5.000000	5.000000	14203389	14203390	7.89798	14203389	14203390	9.68813
Pt	101879	101880	.	1000	+	5.000000	5.000000	101879	101880	9.58413	101879	101880	7.98626
3	14199799	14199800	.	1000	+	5.000000	5.000000	14199799	14199800	7.65553	14199799	14199800	9.91376
3	14199448	14199449	.	1000	+	4.466951	4.855669	14199448	14199449	4.94764	14199448	14199449	12.60900
2	8231	8232	.	1000	+	4.793075	5.000000	8231	8232	5.94297	8231	8232	11.59900
2	8760573	8760574	.	1000	-	4.350957	4.748739	8760573	8760574	4.69612	8760573	8760574	12.83500
1	50187	50188	.	1000	-	4.621847	5.000000	50187	50188	12.20250	50187	50188	5.32570
1	11534495	11534496	.	1000	+	4.731322	5.000000	11534495	11534496	11.73000	11534495	11534496	5.79491
4	17831822	17831823	.	1000	-	4.786994	5.000000	17831822	17831823	11.49280	17831822	17831823	6.02825
2	7198	7199	.	1000	+	5.000000	5.000000	7198	7199	6.92519	7198	7199	10.58920
3	20339653	20339654	.	1000	-	4.870571	5.000000	20339653	20339654	11.01730	20339653	20339654	6.49272
5	16677312	16677313	.	1000	+	4.890108	5.000000	16677312	16677313	11.01730	16677312	16677313	6.49272
2	8574	8575	.	1000	+	5.000000	5.000000	8574	8575	8.38159	8574	8575	9.12284
5	10358578	10358579	.	1000	+	4.925089	5.000000	10358578	10358579	10.77910	10358578	10358579	6.72396
5	26570134	26570135	.	1000	+	4.939295	5.000000	26570134	26570135	10.54070	26570134	26570135	6.95462
2	4961	4962	.	1000	+	4.970898	5.000000	4961	4962	6.68064	4961	4962	10.81390
1	10723069	10723070	.	1000	+	5.000000	5.000000	10723069	10723070	10.06290	10723069	10723070	7.41431
2	4043	4044	.	1000	+	5.000000	5.000000	4043	4044	7.89798	4043	4044	9.57521
2	5451	5452	.	1000	+	5.000000	5.000000	5451	5452	7.89798	5451	5452	9.57521
3	14192980	14192981	.	1000	+	5.000000	5.000000	14192980	14192981	7.89798	14192980	14192981	9.57521
4	14202900	14202901	.	1000	-	5.000000	5.000000	14202900	14202901	9.58413	14202900	14202901	7.87209
2	8641	8642	.	1000	+	5.000000	5.000000	8641	8642	7.16917	8641	8642	10.25170
4	7522563	7522564	.	1000	+	4.640650	5.000000	7522563	7522564	11.96660	7522563	7522564	5.44334
5	13833305	13833306	.	1000	+	4.633315	5.000000	13833305	13833306	11.96660	13833305	13833306	5.44334
5	26570161	26570162	.	1000	+	4.617792	5.000000	26570161	26570162	11.96660	26570161	26570162	5.44334
1	11534506	11534507	.	1000	+	4.509435	4.896184	11534506	11534507	12.43710	11534506	11534507	4.97122
1	22701248	22701249	.	1000	+	4.488458	4.875927	22701248	22701249	12.43710	22701248	22701249	4.97122
3	18888586	18888587	.	1000	+	4.497758	4.883673	18888586	18888587	12.43710	18888586	18888587	4.97122
2	16570882	16570883	.	1000	-	4.674296	5.000000	16570882	16570883	11.73000	16570882	16570883	5.67794
3	7376676	7376677	.	1000	-	4.689898	5.000000	7376676	7376677	11.73000	7376676	7376677	5.67794
2	16570891	16570892	.	1000	-	4.808078	5.000000	16570891	16570892	11.25520	16570891	16570892	6.14463
3	22747149	22747150	.	1000	+	4.800904	5.000000	22747149	22747150	11.25520	22747149	22747150	6.14463
4	17831812	17831813	.	1000	-	4.802869	5.000000	17831812	17831813	11.25520	17831812	17831813	6.14463
3	22975210	22975211	.	1000	+	4.851987	5.000000	22975210	22975211	11.01730	22975210	22975211	6.37686
1	2537779	2537780	.	1000	+	4.893896	5.000000	2537779	2537780	10.77910	2537779	2537780	6.60842
2	9418	9419	.	1000	+	5.000000	5.000000	9418	9419	7.89798	9418	9419	9.46223
2	6540	6541	.	1000	+	5.000000	5.000000	6540	6541	9.82368	6540	6541	7.52893
2	7339	7340	.	1000	+	5.000000	5.000000	7339	7340	7.65553	7339	7340	9.68813
2	13019224	13019225	.	1000	-	5.000000	5.000000	13019224	13019225	9.34428	13019224	13019225	7.98626
Pt	136768	136769	.	1000	-	5.000000	5.000000	136768	136769	9.34428	136768	136769	7.98626
3	14198706	14198707	.	1000	+	5.000000	5.000000	14198706	14198707	7.41260	14198706	14198707	9.91376
Pt	133625	133626	.	1000	-	5.000000	5.000000	133625	133626	9.10412	133625	133626	8.21430
Pt	133554	133555	.	1000	-	5.000000	5.000000	133554	133555	8.86363	133554	133555	8.44196
3	22747082	22747083	.	1000	+	4.648241	5.000000	22747082	22747083	11.73000	22747082	22747083	5.56075
3	14201169	14201170	.	1000	+	5.000000	5.000000	14201169	14201170	6.92519	14201169	14201170	10.36430
2	8737717	8737718	.	1000	+	4.769305	5.000000	8737717	8737718	11.25520	8737717	8737718	6.02825
4	7522595	7522596	.	1000	+	4.758329	5.000000	7522595	7522596	11.25520	7522595	7522596	6.02825
2	13019219	13019220	.	1000	-	4.804314	5.000000	13019219	13019220	11.01730	13019219	13019220	6.26083
4	2672048	2672049	.	1000	-	4.815134	5.000000	2672048	2672049	11.01730	2672048	2672049	6.26083
5	22184472	22184473	.	1000	+	4.855353	5.000000	22184472	22184473	10.77910	22184472	22184473	6.49272
1	3136325	3136326	.	1000	-	4.889198	5.000000	3136325	3136326	10.54070	3136325	3136326	6.72396
2	15043377	15043378	.	1000	+	4.897931	5.000000	15043377	15043378	10.54070	15043377	15043378	6.72396
3	22747111	22747112	.	1000	+	4.900062	5.000000	22747111	22747112	10.54070	22747111	22747112	6.72396
Pt	105128	105129	.	1000	+	4.967658	5.000000	105128	105129	10.06290	105128	105129	7.18472
Pt	133519	133520	.	1000	-	4.954856	5.000000	133519	133520	10.06290	133519	133520	7.18472
3	14198014	14198015	.	1000	+	5.000000	5.000000	14198014	14198015	7.89798	14198014	14198015	9.34917
1	11411027	11411028	.	1000	-	4.974386	5.000000	11411027	11411028	9.82368	11411027	11411028	7.41431
2	8576	8577	.	1000	+	5.000000	5.000000	8576	8577	7.65553	8576	8577	9.57521
3	14201310	14201311	.	1000	+	5.000000	5.000000	14201310	14201311	7.65553	14201310	14201311	9.57521
3	14202612	14202613	.	1000	+	5.000000	5.000000	14202612	14202613	7.16917	14202612	14202613	10.02650
Pt	105144	105145	.	1000	+	5.000000	5.000000	105144	105145	8.86363	105144	105145	8.32818
Pt	133503	133504	.	1000	-	5.000000	5.000000	133503	133504	8.86363	133503	133504	8.32818
2	8737688	8737689	.	1000	+	5.000000	5.000000	8737688	8737689	8.62279	8737688	8737689	8.55565
Pt	104807	104808	.	1000	+	5.000000	5.000000	104807	104808	8.62279	104807	104808	8.55565
3	9796919	9796920	.	1000	+	4.570275	4.964372	9796919	9796920	11.96660	9796919	9796920	5.20780
3	21674741	21674742	.	1000	+	4.608462	5.000000	21674741	21674742	11.73000	21674741	21674742	5.44334
1	26191196	26191197	.	1000	+	4.409134	4.803675	26191196	26191197	12.43710	26191196	26191197	4.73349
5	11619223	11619224	.	1000	-	4.719667	5.000000	11619223	11619224	11.25520	11619223	11619224	5.91168
3	22747165	22747166	.	1000	+	4.349585	4.746041	22747165	22747166	12.66990	22747165	22747166	4.49447
1	2339384	2339385	.	1000	-	4.793285	5.000000	2339384	2339385	11.01730	2339384	2339385	6.14463
3	14198117	14198118	.	1000	+	4.917611	5.000000	14198117	14198118	6.43545	14198117	14198118	10.70160
2	8737689	8737690	.	1000	+	4.947491	5.000000	8737689	8737690	10.06290	8737689	8737690	7.06974
3	20339685	20339686	.	1000	-	4.973042	5.000000	20339685	20339686	9.58413	20339685	20339686	7.52893
2	4537	4538	.	1000	+	4.824159	5.000000	4537	4538	5.94297	4537	4538	11.15060
3	14198533	14198534	.	1000	+	4.817338	5.000000	14198533	14198534	5.94297	14198533	14198534	11.15060
3	14199001	14199002	.	1000	+	4.780559	5.000000	14199001	14199002	5.94297	14199001	14199002	11.15060
4	7522509	7522510	.	1000	+	5.000000	5.000000	7522509	7522510	8.86363	7522509	7522510	8.21430
4	14202898	14202899	.	1000	-	5.000000	5.000000	14202898	14202899	8.62279	14202898	14202899	8.44196
Pt	105093	105094	.	1000	+	5.000000	5.000000	105093	105094	8.62279	105093	105094	8.44196
Pt	133840	133841	.	1000	-	5.000000	5.000000	133840	133841	8.62279	133840	133841	8.44196
3	14199207	14199208	.	1000	+	4.960089	5.000000	14199207	14199208	6.92519	14199207	14199208	10.13910
2	19507667	19507668	.	1000	+	4.509527	4.896652	19507667	19507668	11.96660	19507667	19507668	5.08965
3	15265174	15265175	.	1000	+	4.440599	4.828335	15265174	15265175	12.20250	15265174	15265175	4.85251
4	18163622	18163623	.	1000	-	4.648328	5.000000	18163622	18163623	11.49280	18163622	18163623	5.56075
3	23456009	23456010	.	1000	+	4.713924	5.000000	23456009	23456010	11.25520	23456009	23456010	5.79491
3	14198646	14198647	.	1000	+	4.941664	5.000000	14198646	14198647	6.68064	14198646	14198647	10.36430
3	14202549	14202550	.	1000	+	4.909993	5.000000	14202549	14202550	6.68064	14202549	14202550	10.36430
3	5468629	5468630	.	1000	-	4.831282	5.000000	5468629	5468630	10.54070	5468629	5468630	6.49272
5	210299	210300	.	1000	+	4.852458	5.000000	210299	210300	10.30190	210299	210300	6.72396
3	14199130	14199131	.	1000	+	4.880097	5.000000	14199130	14199131	6.43545	14199130	14199131	10.58920
2	8737712	8737713	.	1000	+	4.925063	5.000000	8737712	8737713	10.06290	8737712	8737713	6.95462
4	7522565	7522566	.	1000	+	4.900778	5.000000	7522565	7522566	10.06290	7522565	7522566	6.95462
Pt	133615	133616	.	1000	-	4.968769	5.000000	133615	133616	9.58413	133615	133616	7.41431
2	8572	8573	.	1000	+	5.000000	5.000000	8572	8573	7.41260	8572	8573	9.57521
3	14201170	14201171	.	1000	+	4.994037	5.000000	14201170	14201171	7.41260	14201170	14201171	9.57521
Pt	105030	105031	.	1000	+	4.980246	5.000000	105030	105031	9.34428	105030	105031	7.64343
3	14199210	14199211	.	1000	+	4.760348	5.000000	14199210	14199211	5.94297	14199210	14199211	11.03840
3	5468634	5468635	.	1000	-	5.000000	5.000000	5468634	5468635	8.86363	5468634	5468635	8.10033
3	14198508	14198509	.	1000	+	4.737541	5.000000	14198508	14198509	5.69555	14198508	14198509	11.26280
3	14199080	14199081	.	1000	+	4.981224	5.000000	14199080	14199081	6.92519	14199080	14199081	10.02650
5	210292	210293	.	1000	+	5.000000	5.000000	210292	210293	8.38159	210292	210293	8.55565
5	210293	210294	.	1000	+	4.607620	5.000000	210293	210294	11.49280	210293	210294	5.44334
5	1028419	1028420	.	1000	-	4.424188	4.814120	1028419	1028420	12.20250	1028419	1028420	4.73349
3	23456011	23456012	.	1000	+	4.650640	5.000000	23456011	23456012	11.25520	23456011	23456012	5.67794
2	4675	4676	.	1000	+	4.948186	5.000000	4675	4676	6.68064	4675	4676	10.25170
2	5236	5237	.	1000	+	4.924066	5.000000	5236	5237	6.68064	5236	5237	10.25170
3	20339674	20339675	.	1000	-	4.743576	5.000000	20339674	20339675	10.77910	20339674	20339675	6.14463
4	1441798	1441799	.	1000	+	4.766415	5.000000	1441798	1441799	10.77910	1441798	1441799	6.14463
4	7521439	7521440	.	1000	+	4.752106	5.000000	7521439	7521440	10.77910	7521439	7521440	6.14463
3	14192984	14192985	.	1000	+	5.000000	5.000000	14192984	14192985	8.13999	14192984	14192985	8.78278
3	14202547	14202548	.	1000	+	5.000000	5.000000	14202547	14202548	8.13999	14202547	14202548	8.78278
1	20802826	20802827	.	1000	-	4.803373	5.000000	20802826	20802827	10.54070	20802826	20802827	6.37686
2	5159	5160	.	1000	+	4.886266	5.000000	5159	5160	6.43545	5159	5160	10.47680
1	29736841	29736842	.	1000	+	4.913519	5.000000	29736841	29736842	9.82368	29736841	29736842	7.06974
3	5669556	5669557	.	1000	-	4.921780	5.000000	5669556	5669557	9.82368	5669556	5669557	7.06974
5	9807504	9807505	.	1000	-	4.058661	4.462461	9807504	9807505	13.12400	9807504	9807505	3.76800
2	8403	8404	.	1000	+	5.000000	5.000000	8403	8404	7.65553	8403	8404	9.23605
3	14199105	14199106	.	1000	+	4.998540	5.000000	14199105	14199106	7.65553	14199105	14199106	9.23605
2	4735	4736	.	1000	+	5.000000	5.000000	4735	4736	7.41260	4735	4736	9.46223
Pt	105032	105033	.	1000	+	4.966845	5.000000	105032	105033	9.34428	105032	105033	7.52893
Pt	133617	133618	.	1000	-	4.951557	5.000000	133617	133618	9.34428	133617	133618	7.52893
3	14200497	14200498	.	1000	+	4.956405	5.000000	14200497	14200498	7.16917	14200497	14200498	9.68813
Pt	104983	104984	.	1000	+	4.976128	5.000000	104983	104984	7.16917	104983	104984	9.68813
3	14201746	14201747	.	1000	+	4.689229	5.000000	14201746	14201747	5.69555	14201746	14201747	11.15060
2	5109	5110	.	1000	+	4.943375	5.000000	5109	5110	6.92519	5109	5110	9.91376
3	14203117	14203118	.	1000	+	4.976844	5.000000	14203117	14203118	6.92519	14203117	14203118	9.91376
3	14202545	14202546	.	1000	+	5.000000	5.000000	14202545	14202546	8.38159	14202545	14202546	8.44196
2	8578	8579	.	1000	+	4.909958	5.000000	8578	8579	6.68064	8578	8579	10.13910
1	22701273	22701274	.	1000	+	4.519582	4.906559	22701273	22701274	11.73000	22701273	22701274	5.08965
4	12871143	12871144	.	1000	+	4.501010	4.887338	12871143	12871144	11.73000	12871143	12871144	5.08965
5	3284320	3284321	.	1000	-	4.523085	4.908460	3284320	3284321	11.73000	3284320	3284321	5.08965
3	3674034	3674035	.	1000	+	4.547675	4.936866	3674034	3674035	11.49280	3674034	3674035	5.32570
3	22269828	22269829	.	1000	+	4.566282	4.956945	22269828	22269829	11.49280	22269828	22269829	5.32570
4	13594033	13594034	.	1000	-	4.567772	4.960637	13594033	13594034	11.49280	13594033	13594034	5.32570
5	4935017	4935018	.	1000	-	4.569522	4.963301	4935017	4935018	11.49280	4935017	4935018	5.32570
1	16873263	16873264	.	1000	+	4.397215	4.792139	16873263	16873264	12.20250	16873263	16873264	4.61415
3	16388355	16388356	.	1000	+	4.631481	5.000000	16388355	16388356	11.25520	16388355	16388356	5.56075
3	23242737	23242738	.	1000	-	4.616553	5.000000	23242737	23242738	11.25520	23242737	23242738	5.56075
3	14203393	14203394	.	1000	+	5.000000	5.000000	14203393	14203394	8.13999	14203393	14203394	8.66926
5	210306	210307	.	1000	+	4.759431	5.000000	210306	210307	10.54070	210306	210307	6.26083
3	5669561	5669562	.	1000	-	4.807099	5.000000	5669561	5669562	10.30190	5669561	5669562	6.49272
2	2588275	2588276	.	1000	-	4.882485	5.000000	2588275	2588276	9.82368	2588275	2588276	6.95462
3	5213002	5213003	.	1000	+	4.872965	5.000000	5213002	5213003	9.82368	5213002	5213003	6.95462
5	210279	210280	.	1000	+	4.886362	5.000000	210279	210280	9.82368	210279	210280	6.95462
Pt	104854	104855	.	1000	+	4.880740	5.000000	104854	104855	9.82368	104854	104855	6.95462
2	5239	5240	.	1000	+	4.792656	5.000000	5239	5240	5.94297	5239	5240	10.81390
2	3747	3748	.	1000	+	4.953536	5.000000	3747	3748	7.16917	3747	3748	9.57521
3	14202543	14202544	.	1000	+	4.965305	5.000000	14202543	14202544	7.16917	14202543	14202544	9.57521
Pt	133664	133665	.	1000	-	4.969409	5.000000	133664	133665	7.16917	133664	133665	9.57521
2	7775	7776	.	1000	+	4.737755	5.000000	7775	7776	5.69555	7775	7776	11.03840
3	14202184	14202185	.	1000	+	4.976820	5.000000	14202184	14202185	8.62279	14202184	14202185	8.10033
2	9146	9147	.	1000	+	4.923408	5.000000	9146	9147	6.68064	9146	9147	10.02650
3	14202245	14202246	.	1000	+	4.923905	5.000000	14202245	14202246	6.68064	14202245	14202246	10.02650
3	4820854	4820855	.	1000	+	4.484703	4.872753	4820854	4820855	11.73000	4820854	4820855	4.97122
4	10916801	10916802	.	1000	+	4.426850	4.815784	10916801	10916802	11.96660	10916801	10916802	4.73349
2	9422	9423	.	1000	+	4.985022	5.000000	9422	9423	8.13999	9422	9423	8.55565
2	1824390	1824391	.	1000	-	4.243496	4.650575	1824390	1824391	12.43710	1824390	1824391	4.25402
3	22747093	22747094	.	1000	+	4.685994	5.000000	22747093	22747094	10.77910	22747093	22747094	5.91168
3	5669606	5669607	.	1000	-	4.702598	5.000000	5669606	5669607	10.77910	5669606	5669607	5.91168
2	16570862	16570863	.	1000	-	4.782400	5.000000	16570862	16570863	10.30190	16570862	16570863	6.37686
4	2672051	2672052	.	1000	-	4.812682	5.000000	2672051	2672052	10.06290	2672051	2672052	6.60842
5	507242	507243	.	1000	-	4.862584	5.000000	507242	507243	9.82368	507242	507243	6.83936
Pt	104819	104820	.	1000	+	4.852226	5.000000	104819	104820	9.82368	104819	104820	6.83936
1	10723066	10723067	.	1000	+	4.872576	5.000000	10723066	10723067	9.58413	10723066	10723067	7.06974
1	8268676	8268677	.	1000	-	4.876126	5.000000	8268676	8268677	9.58413	8268676	8268677	7.06974
3	14203452	14203453	.	1000	+	4.885670	5.000000	14203452	14203453	9.58413	14203452	14203453	7.06974
2	7199	7200	.	1000	+	4.963334	5.000000	7199	7200	7.41260	7199	7200	9.23605
2	3859	3860	.	1000	+	4.748645	5.000000	3859	3860	5.94297	3859	3860	10.70160
2	4562	4563	.	1000	+	4.740163	5.000000	4562	4563	5.94297	4562	4563	10.70160
3	22612714	22612715	.	1000	+	4.909380	5.000000	22612714	22612715	9.34428	22612714	22612715	7.29958
3	14197718	14197719	.	1000	+	4.966796	5.000000	14197718	14197719	7.16917	14197718	14197719	9.46223
2	3979	3980	.	1000	+	4.616131	5.000000	3979	3980	5.44725	3979	3980	11.15060
3	14199789	14199790	.	1000	+	4.944337	5.000000	14199789	14199790	8.38159	14199789	14199790	8.21430
3	14200876	14200877	.	1000	+	4.880856	5.000000	14200876	14200877	6.68064	14200876	14200877	9.91376
1	11214947	11214948	.	1000	-	4.504740	4.892444	11214947	11214948	11.49280	11214947	11214948	5.08965
4	38243	38244	.	1000	+	4.494571	4.880029	38243	38244	11.49280	38243	38244	5.08965
4	9714356	9714357	.	1000	-	4.537303	4.926829	9714356	9714357	11.25520	9714356	9714357	5.32570
1	25263688	25263689	.	1000	+	4.623859	5.000000	25263688	25263689	11.01730	25263688	25263689	5.56075
1	20968164	20968165	.	1000	-	4.651902	5.000000	20968164	20968165	10.77910	20968164	20968165	5.79491
5	13833251	13833252	.	1000	+	4.681276	5.000000	13833251	13833252	10.77910	13833251	13833252	5.79491
3	22747087	22747088	.	1000	+	4.707153	5.000000	22747087	22747088	10.54070	22747087	22747088	6.02825
5	21365421	21365422	.	1000	+	3.706467	4.123209	21365421	21365422	13.54470	21365421	21365422	3.02192
1	10478434	10478435	.	1000	+	4.751553	5.000000	10478434	10478435	10.30190	10478434	10478435	6.26083
3	14201994	14201995	.	1000	+	4.979435	5.000000	14201994	14201995	7.65553	14201994	14201995	8.89621
Pt	133828	133829	.	1000	-	4.824001	5.000000	133828	133829	9.82368	133828	133829	6.72396
2	1966819	1966820	.	1000	+	4.957825	5.000000	1966819	1966820	7.41260	1966819	1966820	9.12284
5	210286	210287	.	1000	+	4.906221	5.000000	210286	210287	9.10412	210286	210287	7.41431
3	7376679	7376680	.	1000	-	4.915755	5.000000	7376679	7376680	8.86363	7376679	7376680	7.64343
2	6526	6527	.	1000	+	4.930529	5.000000	6526	6527	6.92519	6526	6527	9.57521
3	14197950	14197951	.	1000	+	4.637753	5.000000	14197950	14197951	5.44725	14197950	14197951	11.03840
2	5818	5819	.	1000	+	4.953919	5.000000	5818	5819	8.38159	5818	5819	8.10033
2	6905	6906	.	1000	+	4.895162	5.000000	6905	6906	6.68064	6905	6906	9.80098
2	8274	8275	.	1000	+	4.862608	5.000000	8274	8275	6.68064	8274	8275	9.80098
3	14201972	14201973	.	1000	+	4.899613	5.000000	14201972	14201973	6.68064	14201972	14201973	9.80098
3	193364	193365	.	1000	-	4.383210	4.779144	193364	193365	11.73000	193364	193365	4.73349
1	3018079	3018080	.	1000	+	4.341885	4.738384	3018079	3018080	11.96660	3018079	3018080	4.49447
4	7522599	7522600	.	1000	+	4.316762	4.715901	7522599	7522600	11.96660	7522599	7522600	4.49447
1	10723070	10723071	.	1000	+	4.575024	4.971414	10723070	10723071	11.01730	10723070	10723071	5.44334
3	22747086	22747087	.	1000	+	4.590721	4.991547	22747086	22747087	11.01730	22747086	22747087	5.44334
4	2672042	2672043	.	1000	-	4.589885	4.989262	2672042	2672043	11.01730	2672042	2672043	5.44334
4	15926764	15926765	.	1000	-	4.569350	4.962767	15926764	15926765	11.01730	15926764	15926765	5.44334
5	24282219	24282220	.	1000	+	4.585013	4.982481	24282219	24282220	11.01730	24282219	24282220	5.44334
1	29736641	29736642	.	1000	+	4.630677	5.000000	29736641	29736642	10.77910	29736641	29736642	5.67794
3	5669576	5669577	.	1000	-	4.962676	5.000000	5669576	5669577	7.89798	5669576	5669577	8.55565
5	15104223	15104224	.	1000	+	4.679443	5.000000	15104223	15104224	10.54070	15104223	15104224	5.91168
5	2993512	2993513	.	1000	-	4.161880	4.563370	2993512	2993513	12.43710	2993512	2993513	4.01193
1	10478892	10478893	.	1000	+	4.712397	5.000000	10478892	10478893	10.30190	10478892	10478893	6.14463
5	2993540	2993541	.	1000	-	4.725372	5.000000	2993540	2993541	10.30190	2993540	2993541	6.14463
2	8737695	8737696	.	1000	+	4.774446	5.000000	8737695	8737696	10.06290	8737695	8737696	6.37686
2	2588276	2588277	.	1000	-	4.790052	5.000000	2588276	2588277	9.82368	2588276	2588277	6.60842
3	7376697	7376698	.	1000	-	4.785198	5.000000	7376697	7376698	9.82368	7376697	7376698	6.60842
3	14202374	14202375	.	1000	+	4.947124	5.000000	14202374	14202375	7.41260	14202374	14202375	9.00957
3	14197830	14197831	.	1000	+	4.745411	5.000000	14197830	14197831	5.94297	14197830	14197831	10.47680
Pt	105156	105157	.	1000	+	4.860857	5.000000	105156	105157	9.34428	105156	105157	7.06974
Pt	133793	133794	.	1000	-	4.857548	5.000000	133793	133794	9.34428	133793	133794	7.06974
2	4682	4683	.	1000	+	4.909079	5.000000	4682	4683	7.16917	4682	4683	9.23605
2	8776	8777	.	1000	+	4.901645	5.000000	8776	8777	6.68064	8776	8777	9.68813
3	14202037	14202038	.	1000	+	4.850881	5.000000	14202037	14202038	6.68064	14202037	14202038	9.68813
1	3663787	3663788	.	1000	+	4.917156	5.000000	3663787	3663788	8.38159	3663787	3663788	7.98626
1	4761041	4761042	.	1000	+	4.531658	4.917536	4761041	4761042	5.19798	4761041	4761042	11.15060
4	14202897	14202898	.	1000	-	4.488862	4.877293	14202897	14202898	11.25520	14202897	14202898	5.08965
3	21078334	21078335	.	1000	+	4.348048	4.745272	21078334	21078335	11.73000	21078334	21078335	4.61415
3	2917997	2917998	.	1000	+	4.298438	4.696214	2917997	2917998	11.96660	2917997	2917998	4.37444
3	14203084	14203085	.	1000	+	4.943101	5.000000	14203084	14203085	7.89798	14203084	14203085	8.44196
4	7522542	7522543	.	1000	+	4.952089	5.000000	7522542	7522543	7.89798	7522542	7522543	8.44196
3	22747094	22747095	.	1000	+	4.597081	4.997909	22747094	22747095	10.77910	22747094	22747095	5.56075
4	1441819	1441820	.	1000	+	4.581517	4.979686	1441819	1441820	10.77910	1441819	1441820	5.56075
2	11678478	11678479	.	1000	-	4.221592	4.629236	11678478	11678479	12.20250	11678478	11678479	4.13319
1	25375984	25375985	.	1000	+	4.647148	5.000000	25375984	25375985	10.54070	25375984	25375985	5.79491
4	15470469	15470470	.	1000	+	4.634103	5.000000	15470469	15470470	10.54070	15470469	15470470	5.79491
2	13019223	13019224	.	1000	-	4.701905	5.000000	13019223	13019224	10.30190	13019223	13019224	6.02825
3	19506783	19506784	.	1000	+	4.692155	5.000000	19506783	19506784	10.30190	19506783	19506784	6.02825
2	8023	8024	.	1000	+	4.942829	5.000000	8023	8024	7.65553	8023	8024	8.66926
3	14200997	14200998	.	1000	+	4.929709	5.000000	14200997	14200998	7.65553	14200997	14200998	8.66926
4	17831845	17831846	.	1000	-	4.784055	5.000000	17831845	17831846	9.82368	17831845	17831846	6.49272
5	16677313	16677314	.	1000	+	4.769483	5.000000	16677313	16677314	9.82368	16677313	16677314	6.49272
Pt	104945	104946	.	1000	+	4.775217	5.000000	104945	104946	9.82368	104945	104946	6.49272
3	23133201	23133202	.	1000	+	3.996275	4.405581	23133201	23133202	12.66990	23133201	23133202	3.64525
5	4791759	4791760	.	1000	+	3.986389	4.395772	4791759	4791760	12.66990	4791759	4791760	3.64525
2	6133	6134	.	1000	+	2.335654	2.827298	6133	6134	14.29180	6133	6134	2.01358
3	14200104	14200105	.	1000	+	2.849296	3.306507	14200104	14200105	14.29180	14200104	14200105	2.00723
3	10018927	10018928	.	1000	+	4.831407	5.000000	10018927	10018928	9.34428	10018927	10018928	6.95462
5	9285138	9285139	.	1000	-	4.823831	5.000000	9285138	9285139	9.34428	9285138	9285139	6.95462
2	9438	9439	.	1000	+	4.896247	5.000000	9438	9439	7.16917	9438	9439	9.12284
2	4543	4544	.	1000	+	4.284384	4.681738	4543	4544	4.44327	4543	4544	11.82320
3	14198514	14198515	.	1000	+	4.320183	4.719984	14198514	14198515	4.44327	14198514	14198515	11.82320
1	27243084	27243085	.	1000	-	4.389068	4.783588	27243084	27243085	11.49280	27243084	27243085	4.73349
2	12959335	12959336	.	1000	-	4.398194	4.793781	12959335	12959336	11.49280	12959335	12959336	4.73349
2	9113	9114	.	1000	+	4.911061	5.000000	9113	9114	7.89798	9113	9114	8.32818
3	1168411	1168412	.	1000	+	4.313877	4.713311	1168411	1168412	11.73000	1168411	1168412	4.49447
1	20715656	20715657	.	1000	-	4.570390	4.964909	20715656	20715657	10.77910	20715656	20715657	5.44334
4	7522598	7522599	.	1000	+	4.555780	4.946023	7522598	7522599	10.77910	7522598	7522599	5.44334
3	14201418	14201419	.	1000	+	4.816640	5.000000	14201418	14201419	6.18958	14201418	14201419	10.02650
1	10723062	10723063	.	1000	+	4.644002	5.000000	10723062	10723063	10.30190	10723062	10723063	5.91168
1	29736851	29736852	.	1000	+	4.746914	5.000000	29736851	29736852	9.82368	29736851	29736852	6.37686
4	7522507	7522508	.	1000	+	4.737086	5.000000	7522507	7522508	9.82368	7522507	7522508	6.37686
1	11214948	11214949	.	1000	-	4.772559	5.000000	11214948	11214949	9.58413	11214948	11214949	6.60842
3	14193043	14193044	.	1000	+	4.767630	5.000000	14193043	14193044	9.58413	14193043	14193044	6.60842
3	22975216	22975217	.	1000	+	4.779192	5.000000	22975216	22975217	9.58413	22975216	22975217	6.60842
2	9481	9482	.	1000	+	4.810847	5.000000	9481	9482	9.34428	9481	9482	6.83936
2	9829567	9829568	.	1000	-	4.812596	5.000000	9829567	9829568	9.34428	9829567	9829568	6.83936
3	14198653	14198654	.	1000	+	4.893306	5.000000	14198653	14198654	7.16917	14198653	14198654	9.00957
3	14201171	14201172	.	1000	+	4.916304	5.000000	14201171	14201172	7.16917	14201171	14201172	9.00957
2	6436	6437	.	1000	+	4.836399	5.000000	6436	6437	8.86363	6436	6437	7.29958
4	9714333	9714334	.	1000	-	4.405365	4.798707	9714333	9714334	11.25520	9714333	9714334	4.85251
5	21632702	21632703	.	1000	-	4.434369	4.822870	21632702	21632703	11.25520	21632702	21632703	4.85251
4	1112255	1112256	.	1000	-	4.472544	4.862356	1112255	1112256	11.01730	1112255	1112256	5.08965
1	2049274	2049275	.	1000	+	4.543370	4.932831	2049274	2049275	10.77910	2049274	2049275	5.32570
1	7375716	7375717	.	1000	+	4.540116	4.930324	7375716	7375717	10.77910	7375716	7375717	5.32570
3	10319239	10319240	.	1000	+	4.532305	4.918987	10319239	10319240	10.77910	10319239	10319240	5.32570
5	26451106	26451107	.	1000	-	4.544778	4.935348	26451106	26451107	10.77910	26451106	26451107	5.32570
5	20715628	20715629	.	1000	-	4.592353	4.993852	20715628	20715629	10.54070	20715628	20715629	5.56075
2	6156	6157	.	1000	+	4.877831	5.000000	6156	6157	7.65553	6156	6157	8.44196
1	10723056	10723057	.	1000	+	4.680279	5.000000	10723056	10723057	10.06290	10723056	10723057	6.02825
3	3674031	3674032	.	1000	+	4.684779	5.000000	3674031	3674032	10.06290	3674031	3674032	6.02825
2	5134	5135	.	1000	+	4.904536	5.000000	5134	5135	7.41260	5134	5135	8.66926
Pt	105018	105019	.	1000	+	4.881076	5.000000	105018	105019	7.41260	105018	105019	8.66926
Pt	105037	105038	.	1000	+	4.885419	5.000000	105037	105038	7.41260	105037	105038	8.66926
Pt	133702	133703	.	1000	-	4.758536	5.000000	133702	133703	9.58413	133702	133703	6.49272
3	14199444	14199445	.	1000	+	4.319447	4.718494	14199444	14199445	4.69612	14199444	14199445	11.37490
2	7200	7201	.	1000	+	4.874712	5.000000	7200	7201	7.16917	7200	7201	8.89621
3	14193000	14193001	.	1000	+	4.881980	5.000000	14193000	14193001	7.16917	14193000	14193001	8.89621
3	14203409	14203410	.	1000	+	4.866135	5.000000	14203409	14203410	7.16917	14203409	14203410	8.89621
3	14199131	14199132	.	1000	+	4.682171	5.000000	14199131	14199132	5.69555	14199131	14199132	10.36430
5	209048	209049	.	1000	+	4.816383	5.000000	209048	209049	9.10412	209048	209049	6.95462
5	25750244	25750245	.	1000	+	4.820788	5.000000	25750244	25750245	8.86363	25750244	25750245	7.18472
2	7763	7764	.	1000	+	4.841318	5.000000	7763	7764	6.68064	7763	7764	9.34917
2	7396	7397	.	1000	+	4.857595	5.000000	7396	7397	8.38159	7396	7397	7.64343
2	8234	8235	.	1000	+	4.871319	5.000000	8234	8235	8.38159	8234	8235	7.64343
3	14201367	14201368	.	1000	+	4.873773	5.000000	14201367	14201368	8.38159	14201367	14201368	7.64343
Pt	104992	104993	.	1000	+	4.862076	5.000000	104992	104993	8.38159	104992	104993	7.64343
Pt	133655	133656	.	1000	-	4.848140	5.000000	133655	133656	8.38159	133655	133656	7.64343
2	4312	4313	.	1000	+	4.514550	4.899929	4312	4313	5.19798	4312	4313	10.81390
3	14198283	14198284	.	1000	+	4.587652	4.985857	14198283	14198284	5.19798	14198283	14198284	10.81390
1	11534507	11534508	.	1000	+	4.371079	4.768333	11534507	11534508	11.25520	11534507	11534508	4.73349
1	16268690	16268691	.	1000	+	4.362549	4.758865	16268690	16268691	11.25520	16268690	16268691	4.73349
3	4824062	4824063	.	1000	+	4.441443	4.829601	4824062	4824063	11.01730	4824062	4824063	4.97122
3	2917975	2917976	.	1000	+	4.553833	4.942957	2917975	2917976	10.54070	2917975	2917976	5.44334
4	1441802	1441803	.	1000	+	4.554263	4.943466	1441802	1441803	10.54070	1441802	1441803	5.44334
1	4889536	4889537	.	1000	+	4.219049	4.626559	4889536	4889537	11.73000	4889536	4889537	4.25402
3	17468478	17468479	.	1000	+	4.229163	4.634942	17468478	17468479	11.73000	17468478	17468479	4.25402
3	14203358	14203359	.	1000	+	4.861918	5.000000	14203358	14203359	7.65553	14203358	14203359	8.32818
1	25048584	25048585	.	1000	-	4.642841	5.000000	25048584	25048585	10.06290	25048584	25048585	5.91168
2	10243491	10243492	.	1000	+	4.648355	5.000000	10243491	10243492	10.06290	10243491	10243492	5.91168
2	8273	8274	.	1000	+	4.881644	5.000000	8273	8274	7.41260	8273	8274	8.55565
3	14202244	14202245	.	1000	+	4.869236	5.000000	14202244	14202245	7.41260	14202244	14202245	8.55565
Pt	133610	133611	.	1000	-	4.866563	5.000000	133610	133611	7.41260	133610	133611	8.55565
4	17831811	17831812	.	1000	-	4.733034	5.000000	17831811	17831812	9.58413	17831811	17831812	6.37686
5	16677314	16677315	.	1000	+	4.734400	5.000000	16677314	16677315	9.58413	16677314	16677315	6.37686
2	1800385	1800386	.	1000	-	3.962518	4.370752	1800385	1800386	12.43710	1800385	1800386	3.52193
2	5473	5474	.	1000	+	4.358276	4.755741	5473	5474	4.69612	5473	5474	11.26280
2	5160	5161	.	1000	+	4.675716	5.000000	5160	5161	5.69555	5160	5161	10.25170
4	494749	494750	.	1000	+	4.801424	5.000000	494749	494750	9.10412	494749	494750	6.83936
3	14201734	14201735	.	1000	+	4.825751	5.000000	14201734	14201735	6.68064	14201734	14201735	9.23605
2	3911	3912	.	1000	+	4.575991	4.973060	3911	3912	5.19798	3911	3912	10.70160
3	14197882	14197883	.	1000	+	4.519076	4.906082	14197882	14197883	5.19798	14197882	14197883	10.70160
1	29736338	29736339	.	1000	+	4.409776	4.804927	29736338	29736339	11.01730	29736338	29736339	4.85251
1	21380246	21380247	.	1000	+	4.508635	4.894784	21380246	21380247	10.54070	21380246	21380247	5.32570
2	18626346	18626347	.	1000	+	4.503753	4.891046	18626346	18626347	10.54070	18626346	18626347	5.32570
3	18504856	18504857	.	1000	+	4.528647	4.913691	18504856	18504857	10.54070	18504856	18504857	5.32570
2	16570892	16570893	.	1000	-	4.568426	4.961701	16570892	16570893	10.30190	16570892	16570893	5.56075
4	14202909	14202910	.	1000	-	4.580691	4.978016	14202909	14202910	10.30190	14202909	14202910	5.56075
5	21632658	21632659	.	1000	-	4.574819	4.970867	21632658	21632659	10.30190	21632658	21632659	5.56075
3	9796950	9796951	.	1000	+	4.615318	5.000000	9796950	9796951	10.06290	9796950	9796951	5.79491
2	5135	5136	.	1000	+	4.713978	5.000000	5135	5136	5.94297	5135	5136	9.91376
2	9387	9388	.	1000	+	4.871210	5.000000	9387	9388	7.41260	9387	9388	8.44196
3	14200127	14200128	.	1000	+	4.864215	5.000000	14200127	14200128	7.41260	14200127	14200128	8.44196
2	8737721	8737722	.	1000	+	4.678017	5.000000	8737721	8737722	9.58413	8737721	8737722	6.26083
1	11534497	11534498	.	1000	+	4.729291	5.000000	11534497	11534498	9.34428	11534497	11534498	6.49272
1	2640931	2640932	.	1000	-	4.756190	5.000000	2640931	2640932	9.10412	2640931	2640932	6.72396
2	6525	6526	.	1000	+	4.761348	5.000000	6525	6526	9.10412	6525	6526	6.72396
3	5669641	5669642	.	1000	-	4.752526	5.000000	5669641	5669642	9.10412	5669641	5669642	6.72396
5	16677319	16677320	.	1000	+	4.760327	5.000000	16677319	16677320	9.10412	16677319	16677320	6.72396
3	14200637	14200638	.	1000	+	4.859357	5.000000	14200637	14200638	6.92519	14200637	14200638	8.89621
3	14200496	14200497	.	1000	+	4.765925	5.000000	14200496	14200497	8.86363	14200496	14200497	6.95462
5	3111060	3111061	.	1000	-	4.760962	5.000000	3111060	3111061	8.86363	3111060	3111061	6.95462
Pt	104849	104850	.	1000	+	4.789700	5.000000	104849	104850	8.86363	104849	104850	6.95462
2	8001	8002	.	1000	+	4.800299	5.000000	8001	8002	6.68064	8001	8002	9.12284
3	14200499	14200500	.	1000	+	4.808566	5.000000	14200499	14200500	8.38159	14200499	14200500	7.41431
3	14202205	14202206	.	1000	+	4.813734	5.000000	14202205	14202206	8.38159	14202205	14202206	7.41431
Pt	104747	104748	.	1000	+	4.798138	5.000000	104747	104748	8.38159	104747	104748	7.41431
Pt	133900	133901	.	1000	-	4.799697	5.000000	133900	133901	8.38159	133900	133901	7.41431
2	3850	3851	.	1000	+	4.812806	5.000000	3850	3851	6.43545	3850	3851	9.34917
3	14199208	14199209	.	1000	+	4.791060	5.000000	14199208	14199209	6.43545	14199208	14199209	9.34917
3	14202684	14202685	.	1000	+	4.783999	5.000000	14202684	14202685	6.43545	14202684	14202685	9.34917
5	11839705	11839706	.	992	+	1.869995	2.389614	11839705	11839706	14.29180	11839705	11839706	1.47514
2	11839602	11839603	.	1000	+	4.083513	4.488546	11839602	11839603	3.93729	11839602	11839603	11.81890
1	12358020	12358021	.	1000	-	4.376390	4.773119	12358020	12358021	11.01730	12358020	12358021	4.73349
5	26142531	26142532	.	1000	-	4.440059	4.827913	26142531	26142532	10.77910	26142531	26142532	4.97122
3	2917983	2917984	.	1000	+	4.301380	4.699799	2917983	2917984	11.25520	2917983	2917984	4.49447
5	4762495	4762496	.	1000	+	4.298309	4.695857	4762495	4762496	11.25520	4762495	4762496	4.49447
1	5776240	5776241	.	1000	+	4.463905	4.853458	5776240	5776241	10.54070	5776240	5776241	5.20780
1	10640602	10640603	.	1000	+	4.470213	4.859670	10640602	10640603	10.54070	10640602	10640603	5.20780
2	13177123	13177124	.	1000	+	4.539838	4.929823	13177123	13177124	10.30190	13177123	13177124	5.44334
4	1441803	1441804	.	1000	+	4.536350	4.924851	1441803	1441804	10.30190	1441803	1441804	5.44334
3	2717677	2717678	.	1000	+	4.590109	4.989831	2717677	2717678	10.06290	2717677	2717678	5.67794
3	14192949	14192950	.	1000	+	4.819130	5.000000	14192949	14192950	7.41260	14192949	14192950	8.32818
1	8338501	8338502	.	1000	+	4.640076	5.000000	8338501	8338502	9.82368	8338501	8338502	5.91168
4	7522603	7522604	.	1000	+	4.634260	5.000000	7522603	7522604	9.82368	7522603	7522604	5.91168
5	21632722	21632723	.	1000	-	4.617753	5.000000	21632722	21632723	9.82368	21632722	21632723	5.91168
3	3674012	3674013	.	1000	+	4.700342	5.000000	3674012	3674013	9.34428	3674012	3674013	6.37686
2	8989223	8989224	.	1000	+	4.709500	5.000000	8989223	8989224	9.10412	8989223	8989224	6.60842
5	26570136	26570137	.	1000	+	4.749828	5.000000	26570136	26570137	9.10412	26570136	26570137	6.60842
5	3284331	3284332	.	1000	-	4.739822	5.000000	3284331	3284332	9.10412	3284331	3284332	6.60842
Pt	133491	133492	.	1000	-	4.736403	5.000000	133491	133492	9.10412	133491	133492	6.60842
2	6666	6667	.	1000	+	4.807194	5.000000	6666	6667	6.92519	6666	6667	8.78278
1	17868249	17868250	.	1000	+	4.761912	5.000000	17868249	17868250	8.86363	17868249	17868250	6.83936
Pt	133798	133799	.	1000	-	4.749150	5.000000	133798	133799	8.86363	133798	133799	6.83936
3	14199079	14199080	.	1000	+	4.616060	5.000000	14199079	14199080	5.44725	14199079	14199080	10.25170
3	14201639	14201640	.	1000	+	4.800673	5.000000	14201639	14201640	8.38159	14201639	14201640	7.29958
2	8713	8714	.	1000	+	4.781022	5.000000	8713	8714	6.43545	8713	8714	9.23605
2	5237	5238	.	1000	+	4.727276	5.000000	5237	5238	6.18958	5237	5238	9.46223
2	8644	8645	.	1000	+	4.797879	5.000000	8644	8645	7.65553	8644	8645	7.98626
3	14202615	14202616	.	1000	+	4.824664	5.000000	14202615	14202616	7.65553	14202615	14202616	7.98626
2	4966	4967	.	1000	+	4.685458	5.000000	4966	4967	5.94297	4966	4967	9.68813
1	16873249	16873250	.	1000	+	4.273517	4.671014	16873249	16873250	11.25520	16873249	16873250	4.37444
3	5669594	5669595	.	1000	-	4.566967	4.959576	5669594	5669595	10.06290	5669594	5669595	5.56075
3	7376678	7376679	.	1000	-	4.562552	4.954320	7376678	7376679	10.06290	7376678	7376679	5.56075
3	20339687	20339688	.	1000	-	4.537102	4.925838	20339687	20339688	10.06290	20339687	20339688	5.56075
4	14202887	14202888	.	1000	-	4.607193	5.000000	14202887	14202888	9.82368	14202887	14202888	5.79491
4	17831851	17831852	.	1000	-	4.660848	5.000000	17831851	17831852	9.34428	17831851	17831852	6.26083
1	8268681	8268682	.	1000	-	4.704741	5.000000	8268681	8268682	9.10412	8268681	8268682	6.49272
2	5448	5449	.	1000	+	4.784094	5.000000	5448	5449	6.92519	5448	5449	8.66926
3	14200407	14200408	.	1000	+	4.732348	5.000000	14200407	14200408	8.86363	14200407	14200408	6.72396
Pt	105009	105010	.	746	+	1.241398	1.798391	105009	105010	14.29180	105009	105010	1.29504
2	5108	5109	.	1000	+	4.587980	4.987554	5108	5109	5.44725	5108	5109	10.13910
3	14202922	14202923	.	1000	+	4.612587	5.000000	14202922	14202923	5.44725	14202922	14202923	10.13910
2	6132	6133	.	1000	+	4.806378	5.000000	6132	6133	6.68064	6132	6133	8.89621
3	14200103	14200104	.	1000	+	4.760033	5.000000	14200103	14200104	6.68064	14200103	14200104	8.89621
3	22975195	22975196	.	1000	+	4.762972	5.000000	22975195	22975196	8.38159	22975195	22975196	7.18472
Pt	104888	104889	.	859	+	1.526881	2.069447	104888	104889	1.71044	104888	104889	13.85420
Pt	133759	133760	.	860	-	1.528834	2.071922	133759	133760	1.71044	133759	133760	13.85420
3	14193014	14193015	.	1000	+	4.759759	5.000000	14193014	14193015	6.43545	14193014	14193015	9.12284
Pt	133638	133639	.	874	-	1.565031	2.105890	133638	133639	14.29180	133638	133639	1.26366
2	6528	6529	.	1000	+	4.784197	5.000000	6528	6529	8.13999	6528	6529	7.41431
3	14197821	14197822	.	1000	+	4.686434	5.000000	14197821	14197822	6.18958	14197821	14197822	9.34917
2	6640	6641	.	1000	+	4.789249	5.000000	6640	6641	7.65553	6640	6641	7.87209
2	9046	9047	.	1000	+	4.814022	5.000000	9046	9047	7.65553	9046	9047	7.87209
3	14203017	14203018	.	1000	+	4.785131	5.000000	14203017	14203018	7.65553	14203017	14203018	7.87209
2	7361	7362	.	1000	+	4.801992	5.000000	7361	7362	7.41260	7361	7362	8.10033
3	14201332	14201333	.	1000	+	4.786954	5.000000	14201332	14201333	7.41260	14201332	14201333	8.10033
Pt	133869	133870	.	1000	-	4.810368	5.000000	133869	133870	7.41260	133869	133870	8.10033
3	7377113	7377114	.	1000	-	4.367617	4.763583	7377113	7377114	10.77910	7377113	7377114	4.73349
5	6851583	6851584	.	1000	-	4.424562	4.814536	6851583	6851584	10.54070	6851583	6851584	4.97122
5	15384255	15384256	.	1000	-	4.424086	4.813705	15384255	15384256	10.54070	15384255	15384256	4.97122
1	2049273	2049274	.	1000	+	4.463606	4.853017	2049273	2049274	10.30190	2049273	2049274	5.20780
1	11214938	11214939	.	1000	-	4.473513	4.862805	11214938	11214939	10.30190	11214938	11214939	5.20780
4	7522596	7522597	.	1000	+	4.459747	4.848628	7522596	7522597	10.30190	7522596	7522597	5.20780
1	29736847	29736848	.	1000	+	4.530071	4.915608	29736847	29736848	10.06290	29736847	29736848	5.44334
3	22975202	22975203	.	1000	+	4.517125	4.904180	22975202	22975203	10.06290	22975202	22975203	5.44334
1	28402158	28402159	.	1000	+	4.114598	4.518609	28402158	28402159	11.49280	28402158	28402159	4.01193
3	7376694	7376695	.	1000	-	4.560274	4.951191	7376694	7376695	9.82368	7376694	7376695	5.67794
4	11335673	11335674	.	1000	+	4.570159	4.963837	11335673	11335674	9.82368	11335673	11335674	5.67794
4	15470468	15470469	.	1000	+	4.552294	4.941938	15470468	15470469	9.82368	15470468	15470469	5.67794
4	17831819	17831820	.	1000	-	4.554676	4.943976	17831819	17831820	9.82368	17831819	17831820	5.67794
4	17831835	17831836	.	1000	-	4.550216	4.940409	17831835	17831836	9.82368	17831835	17831836	5.67794
5	1138363	1138364	.	1000	+	4.570719	4.965448	1138363	1138364	9.82368	1138363	1138364	5.67794
Pt	104835	104836	.	689	+	1.094042	1.659562	104835	104836	14.29180	104835	104836	1.20748
2	16573429	16573430	.	1000	-	4.052311	4.457311	16573429	16573430	11.73000	16573429	16573430	3.76800
4	18163609	18163610	.	1000	-	4.067128	4.471810	18163609	18163610	11.73000	18163609	18163610	3.76800
Pt	133629	133630	.	1000	-	4.802761	5.000000	133629	133630	7.16917	133629	133630	8.32818
3	14197999	14198000	.	1000	+	4.616165	5.000000	14197999	14198000	5.69555	14197999	14198000	9.80098
2	13019216	13019217	.	1000	-	4.621728	5.000000	13019216	13019217	9.58413	13019216	13019217	5.91168
Pt	133812	133813	.	703	-	1.129726	1.693358	133812	133813	14.29180	133812	133813	1.19875
2	11270813	11270814	.	1000	+	4.632435	5.000000	11270813	11270814	9.34428	11270813	11270814	6.14463
3	14199419	14199420	.	1000	+	4.804188	5.000000	14199419	14199420	6.92519	14199419	14199420	8.55565
2	5436	5437	.	1000	+	4.555309	4.944998	5436	5437	5.44725	5436	5437	10.02650
2	8951	8952	.	1000	+	4.574198	4.969777	8951	8952	5.44725	8951	8952	10.02650
3	14199407	14199408	.	1000	+	4.601356	5.000000	14199407	14199408	5.44725	14199407	14199408	10.02650
Pt	105123	105124	.	1000	+	4.702429	5.000000	105123	105124	8.86363	105123	105124	6.60842
Pt	133493	133494	.	1000	-	4.719823	5.000000	133493	133494	8.62279	133493	133494	6.83936
4	6409527	6409528	.	1000	+	4.748979	5.000000	6409527	6409528	8.38159	6409527	6409528	7.06974
5	24282213	24282214	.	1000	+	4.752949	5.000000	24282213	24282214	8.38159	24282213	24282214	7.06974
Pt	105023	105024	.	566	+	0.802425	1.364358	105023	105024	14.29180	105023	105024	1.15825
2	9452	9453	.	1000	+	4.767252	5.000000	9452	9453	6.43545	9452	9453	9.00957
3	5669573	5669574	.	1000	-	4.748381	5.000000	5669573	5669574	8.13999	5669573	5669574	7.29958
Pt	133624	133625	.	668	-	1.045387	1.610781	133624	133625	14.29180	133624	133625	1.13306
3	14200611	14200612	.	1000	+	4.789074	5.000000	14200611	14200612	7.65553	14200611	14200612	7.75781
Pt	132544	132545	.	1000	-	4.673691	5.000000	132544	132545	5.94297	132544	132545	9.46223
Pt	104778	104779	.	1000	+	4.804152	5.000000	104778	104779	7.41260	104778	104779	7.98626
4	10730088	10730089	.	1000	+	4.315113	4.714790	10730088	10730089	10.77910	10730088	10730089	4.61415
1	3867726	3867727	.	1000	-	4.388923	4.783185	3867726	3867727	10.54070	3867726	3867727	4.85251
3	22747134	22747135	.	1000	+	4.359482	4.756523	22747134	22747135	10.54070	22747134	22747135	4.85251
3	7376673	7376674	.	1000	-	4.386314	4.781972	7376673	7376674	10.54070	7376673	7376674	4.85251
4	10427181	10427182	.	1000	-	4.374646	4.770725	10427181	10427182	10.54070	10427181	10427182	4.85251
5	4935015	4935016	.	1000	-	4.362265	4.758084	4935015	4935016	10.54070	4935015	4935016	4.85251
4	17831839	17831840	.	1000	-	4.432431	4.820363	17831839	17831840	10.30190	17831839	17831840	5.08965
2	18244957	18244958	.	1000	+	4.175311	4.579004	18244957	18244958	11.25520	18244957	18244958	4.13319
4	12871153	12871154	.	1000	+	4.151276	4.551079	12871153	12871154	11.25520	12871153	12871154	4.13319
5	25214219	25214220	.	1000	-	4.172341	4.574440	25214219	25214220	11.25520	25214219	25214220	4.13319
1	12024624	12024625	.	1000	+	4.536181	4.924358	12024624	12024625	9.82368	12024624	12024625	5.56075
1	50248	50249	.	1000	-	4.544621	4.934843	50248	50249	9.82368	50248	50249	5.56075
3	14198643	14198644	.	1000	+	4.632574	5.000000	14198643	14198644	5.69555	14198643	14198644	9.68813
3	14199106	14199107	.	1000	+	4.643093	5.000000	14199106	14199107	5.69555	14199106	14199107	9.68813
2	4673	4674	.	1000	+	4.789759	5.000000	4673	4674	7.16917	4673	4674	8.21430
3	14198644	14198645	.	1000	+	4.790716	5.000000	14198644	14198645	7.16917	14198644	14198645	8.21430
4	1441824	1441825	.	1000	+	4.648011	5.000000	1441824	1441825	9.10412	1441824	1441825	6.26083
2	8588	8589	.	1000	+	4.551558	4.941428	8588	8589	5.44725	8588	8589	9.91376
1	3918028	3918029	.	1000	+	4.674369	5.000000	3918028	3918029	8.86363	3918028	3918029	6.49272
Pt	133524	133525	.	1000	-	4.691078	5.000000	133524	133525	8.86363	133524	133525	6.49272
1	20968161	20968162	.	1000	-	4.706921	5.000000	20968161	20968162	8.62279	20968161	20968162	6.72396
Pt	105033	105034	.	1000	+	4.724914	5.000000	105033	105034	8.38159	105033	105034	6.95462
3	14203423	14203424	.	1000	+	4.723849	5.000000	14203423	14203424	6.43545	14203423	14203424	8.89621
3	14198397	14198398	.	1000	+	4.663870	5.000000	14198397	14198398	6.18958	14198397	14198398	9.12284
Pt	106103	106104	.	1000	+	4.640071	5.000000	106103	106104	5.94297	106103	106104	9.34917
1	608022	608023	.	1000	-	4.283550	4.681388	608022	608023	10.77910	608022	608023	4.49447
3	2917985	2917986	.	1000	+	4.294573	4.691244	2917985	2917986	10.77910	2917985	2917986	4.49447
4	9714342	9714343	.	1000	-	4.272957	4.670670	9714342	9714343	10.77910	9714342	9714343	4.49447
1	8268653	8268654	.	1000	-	4.385883	4.781568	8268653	8268654	10.30190	8268653	8268654	4.97122
3	4824064	4824065	.	1000	+	4.383730	4.779951	4824064	4824065	10.30190	4824064	4824065	4.97122
4	6409574	6409575	.	1000	+	4.390473	4.785205	6409574	6409575	10.30190	6409574	6409575	4.97122
3	5505462	5505463	.	1000	+	4.207711	4.612092	5505462	5505463	11.01730	5505462	5505463	4.25402
2	5133	5134	.	1000	+	4.629305	5.000000	5133	5134	5.69555	5133	5134	9.57521
3	14202396	14202397	.	1000	+	4.573503	4.969233	14202396	14202397	5.69555	14202396	14202397	9.57521
1	916984	916985	.	1000	-	4.444329	4.834724	916984	916985	10.06290	916984	916985	5.20780
2	14300850	14300851	.	1000	-	4.442103	4.830873	14300850	14300851	10.06290	14300850	14300851	5.20780
3	20339662	20339663	.	1000	-	4.452749	4.842943	20339662	20339663	10.06290	20339662	20339663	5.20780
4	2350653	2350654	.	1000	-	4.441109	4.828757	2350653	2350654	10.06290	2350653	2350654	5.20780
Pt	104777	104778	.	1000	+	4.731084	5.000000	104777	104778	7.16917	104777	104778	8.10033
Pt	133870	133871	.	1000	-	4.767767	5.000000	133870	133871	7.16917	133870	133871	8.10033
1	1766675	1766676	.	1000	-	4.496826	4.882304	1766675	1766676	9.82368	1766675	1766676	5.44334
2	18244969	18244970	.	1000	+	4.475984	4.865950	18244969	18244970	9.82368	18244969	18244970	5.44334
Pt	105159	105160	.	1000	+	4.475305	4.864600	105159	105160	9.82368	105159	105160	5.44334
2	11763365	11763366	.	1000	-	4.577025	4.973611	11763365	11763366	9.34428	11763365	11763366	5.91168
4	11335649	11335650	.	1000	+	4.580533	4.977462	11335649	11335650	9.34428	11335649	11335650	5.91168
1	28272769	28272770	.	1000	+	4.616624	5.000000	28272769	28272770	9.10412	28272769	28272770	6.14463
5	210302	210303	.	1000	+	4.629482	5.000000	210302	210303	9.10412	210302	210303	6.14463
4	14202882	14202883	.	1000	-	4.665642	5.000000	14202882	14202883	8.86363	14202882	14202883	6.37686
2	8446	8447	.	1000	+	4.467642	4.857442	8446	8447	5.19798	8446	8447	10.02650
3	14202417	14202418	.	1000	+	4.537710	4.927825	14202417	14202418	5.19798	14202417	14202418	10.02650
2	4427	4428	.	1000	+	4.704697	5.000000	4427	4428	6.43545	4427	4428	8.78278
2	8228	8229	.	1000	+	4.713380	5.000000	8228	8229	8.13999	8228	8229	7.06974
3	14201597	14201598	.	1000	+	4.731302	5.000000	14201597	14201598	8.13999	14201597	14201598	7.06974
3	14199412	14199413	.	1000	+	4.397394	4.792549	14199412	14199413	4.94764	14199412	14199413	10.25170
2	4738	4739	.	1000	+	4.682992	5.000000	4738	4739	6.18958	4738	4739	9.00957
2	6277	6278	.	1000	+	4.722789	5.000000	6277	6278	7.89798	6277	6278	7.29958
3	14200248	14200249	.	1000	+	4.730727	5.000000	14200248	14200249	7.89798	14200248	14200249	7.29958
3	14201195	14201196	.	1000	+	4.620261	5.000000	14201195	14201196	5.94297	14201195	14201196	9.23605
5	24282290	24282291	.	1000	+	4.732546	5.000000	24282290	24282291	7.41260	24282290	24282291	7.75781
2	4028	4029	.	1000	+	4.560673	4.952231	4028	4029	5.69555	4028	4029	9.46223
3	14199104	14199105	.	1000	+	4.585051	4.983041	14199104	14199105	5.69555	14199104	14199105	9.46223
2	7548238	7548239	.	1000	+	4.286832	4.684888	7548238	7548239	10.54070	7548238	7548239	4.61415
3	6453911	6453912	.	1000	+	4.305403	4.705610	6453911	6453912	10.54070	6453911	6453912	4.61415
3	22747077	22747078	.	1000	+	4.363963	4.760829	22747077	22747078	10.30190	22747077	22747078	4.85251
2	1966268	1966269	.	1000	+	4.411388	4.805763	1966268	1966269	10.06290	1966268	1966269	5.08965
2	14532777	14532778	.	1000	-	4.157936	4.558363	14532777	14532778	11.01730	14532777	14532778	4.13319
4	15510539	15510540	.	1000	+	4.451693	4.841206	15510539	15510540	9.82368	15510539	15510540	5.32570
3	4820881	4820882	.	1000	+	4.529754	4.915128	4820881	4820882	9.58413	4820881	4820882	5.56075
5	20715652	20715653	.	1000	-	4.488579	4.876381	20715652	20715653	9.58413	20715652	20715653	5.56075
5	21632661	21632662	.	1000	-	4.518156	4.905131	21632661	21632662	9.58413	21632661	21632662	5.56075
3	14192997	14192998	.	1000	+	4.730400	5.000000	14192997	14192998	6.92519	14192997	14192998	8.21430
3	5669548	5669549	.	1000	-	4.561727	4.953274	5669548	5669549	9.34428	5669548	5669549	5.79491
2	5838	5839	.	1000	+	4.549320	4.938887	5838	5839	5.44725	5838	5839	9.68813
3	14199809	14199810	.	1000	+	4.577524	4.974161	14199809	14199810	5.44725	14199809	14199810	9.68813
3	14202559	14202560	.	1000	+	4.530725	4.917053	14202559	14202560	5.44725	14202559	14202560	9.68813
1	3136335	3136336	.	1000	-	4.587667	4.986987	3136335	3136336	9.10412	3136335	3136336	6.02825
2	8240	8241	.	1000	+	4.735286	5.000000	8240	8241	6.68064	8240	8241	8.44196
3	14200613	14200614	.	1000	+	4.714953	5.000000	14200613	14200614	6.68064	14200613	14200614	8.44196
1	2047884	2047885	.	1000	+	4.665690	5.000000	2047884	2047885	8.62279	2047884	2047885	6.49272
2	5156	5157	.	1000	+	4.477461	4.867760	5156	5157	5.19798	5156	5157	9.91376
3	14202884	14202885	.	1000	+	4.513688	4.898994	14202884	14202885	5.19798	14202884	14202885	9.91376
4	7522531	7522532	.	1000	+	4.674507	5.000000	7522531	7522532	8.38159	7522531	7522532	6.72396
Pt	133614	133615	.	1000	-	4.686583	5.000000	133614	133615	8.38159	133614	133615	6.72396
3	14200628	14200629	.	1000	+	4.691052	5.000000	14200628	14200629	6.43545	14200628	14200629	8.66926
3	14192953	14192954	.	918	+	1.676676	2.212207	14192953	14192954	13.72930	14192953	14192954	1.37164
4	7522538	7522539	.	1000	+	4.697361	5.000000	7522538	7522539	8.13999	7522538	7522539	6.95462
3	14203362	14203363	.	919	+	1.679779	2.215459	14203362	14203363	13.72930	14203362	14203363	1.36409
2	9391	9392	.	917	+	1.675253	2.210725	9391	9392	13.72930	9391	9392	1.35651
3	14198473	14198474	.	1000	+	4.705541	5.000000	14198473	14198474	6.18958	14198473	14198474	8.89621
2	8452	8453	.	1000	+	4.658341	5.000000	8452	8453	5.94297	8452	8453	9.12284
3	14201612	14201613	.	1000	+	4.724479	5.000000	14201612	14201613	7.41260	14201612	14201613	7.64343
2	8732	8733	.	1000	+	4.614492	5.000000	8732	8733	5.69555	8732	8733	9.34917
3	14202703	14202704	.	1000	+	4.591760	4.993274	14202703	14202704	5.69555	14202703	14202704	9.34917
2	6449	6450	.	576	+	0.829129	1.389263	6449	6450	1.44703	6449	6450	13.58910
3	14200420	14200421	.	576	+	0.827126	1.387302	14200420	14200421	1.44703	14200420	14200421	13.58910
1	27847158	27847159	.	1000	-	4.339467	4.735363	27847158	27847159	10.30190	27847158	27847159	4.73349
1	11214950	11214951	.	1000	-	4.245609	4.652647	11214950	11214951	10.54070	11214950	11214951	4.49447
3	1622883	1622884	.	1000	+	4.261433	4.664468	1622883	1622884	10.54070	1622883	1622884	4.49447
1	1189229	1189230	.	1000	-	4.370765	4.767142	1189229	1189230	10.06290	1189229	1189230	4.97122
4	7522572	7522573	.	1000	+	4.380385	4.776728	7522572	7522573	10.06290	7522572	7522573	4.97122
5	2993539	2993540	.	1000	-	4.368288	4.765161	2993539	2993540	10.06290	2993539	2993540	4.97122
3	22747100	22747101	.	1000	+	4.205266	4.609833	22747100	22747101	10.77910	22747100	22747101	4.25402
4	7521428	7521429	.	1000	+	4.179222	4.581761	7521428	7521429	10.77910	7521428	7521429	4.25402
3	14198998	14198999	.	1000	+	4.237135	4.642368	14198998	14198999	4.44327	14198998	14198999	10.58920
2	8760565	8760566	.	1000	-	4.429539	4.817858	8760565	8760566	9.82368	8760565	8760566	5.20780
3	16388346	16388347	.	1000	+	4.417031	4.809518	16388346	16388347	9.82368	16388346	16388347	5.20780
5	26570233	26570234	.	1000	+	4.429355	4.817028	26570233	26570234	9.82368	26570233	26570234	5.20780
4	7521429	7521430	.	1000	+	4.475977	4.865500	7521429	7521430	9.58413	7521429	7521430	5.44334
4	1229226	1229227	.	1000	-	4.478853	4.868668	1229226	1229227	9.58413	1229226	1229227	5.44334
1	2049276	2049277	.	1000	+	4.505372	4.893379	2049276	2049277	9.34428	2049276	2049277	5.67794
5	26570171	26570172	.	1000	+	4.556307	4.947567	26570171	26570172	9.10412	26570171	26570172	5.91168
2	5338	5339	.	1000	+	4.689456	5.000000	5338	5339	6.68064	5338	5339	8.32818
3	14202211	14202212	.	1000	+	4.688175	5.000000	14202211	14202212	6.68064	14202211	14202212	8.32818
3	21708783	21708784	.	1000	+	4.601913	5.000000	21708783	21708784	8.86363	21708783	21708784	6.14463
Pt	133486	133487	.	1000	-	4.602253	5.000000	133486	133487	8.86363	133486	133487	6.14463
3	20175540	20175541	.	1000	-	2.935786	3.390033	20175540	20175541	12.89960	20175540	20175541	2.10857
3	5669575	5669576	.	1000	-	4.621512	5.000000	5669575	5669576	8.62279	5669575	5669576	6.37686
2	7170	7171	.	1000	+	4.671800	5.000000	7170	7171	6.43545	7170	7171	8.55565
3	14198398	14198399	.	1000	+	4.701803	5.000000	14198398	14198399	6.43545	14198398	14198399	8.55565
3	14202330	14202331	.	1000	+	4.704891	5.000000	14202330	14202331	6.43545	14202330	14202331	8.55565
Pt	105154	105155	.	1000	+	4.628408	5.000000	105154	105155	8.38159	105154	105155	6.60842
2	5132	5133	.	1000	+	4.456535	4.846436	5132	5133	4.94764	5132	5133	10.02650
3	14199103	14199104	.	1000	+	4.375453	4.771522	14199103	14199104	4.94764	14199103	14199104	10.02650
2	4426	4427	.	1000	+	4.687489	5.000000	4426	4427	6.18958	4426	4427	8.78278
2	4502	4503	.	1000	+	4.644441	5.000000	4502	4503	6.18958	4502	4503	8.78278
2	7224	7225	.	1000	+	4.612591	5.000000	7224	7225	5.94297	7224	7225	9.00957
2	8066	8067	.	1000	+	4.641136	5.000000	8066	8067	5.94297	8066	8067	9.00957
3	14202423	14202424	.	1000	+	4.630531	5.000000	14202423	14202424	5.94297	14202423	14202424	9.00957
3	14192999	14193000	.	1000	+	4.607174	5.000000	14192999	14193000	5.69555	14192999	14193000	9.23605
5	24282296	24282297	.	1000	+	4.301612	4.700159	24282296	24282297	10.30190	24282296	24282297	4.61415
2	13177143	13177144	.	1000	+	4.339144	4.734610	13177143	13177144	10.06290	13177143	13177144	4.85251
3	3674046	3674047	.	1000	+	4.342174	4.739524	3674046	3674047	10.06290	3674046	3674047	4.85251
3	20339679	20339680	.	1000	-	4.408543	4.802430	20339679	20339680	9.82368	20339679	20339680	5.08965
5	13833313	13833314	.	1000	+	4.414721	4.807851	13833313	13833314	9.82368	13833313	13833314	5.08965
2	18911835	18911836	.	1000	+	4.156092	4.556313	18911835	18911836	10.77910	18911835	18911836	4.13319
2	5071	5072	.	1000	+	4.701523	5.000000	5071	5072	6.92519	5071	5072	7.98626
2	9435	9436	.	1000	+	4.682337	5.000000	9435	9436	6.92519	9435	9436	7.98626
3	14203406	14203407	.	1000	+	4.707365	5.000000	14203406	14203407	6.92519	14203406	14203407	7.98626
1	10640614	10640615	.	1000	+	4.437031	4.825389	10640614	10640615	9.58413	10640614	10640615	5.32570
3	20711470	20711471	.	1000	+	4.463590	4.852576	20711470	20711471	9.58413	20711470	20711471	5.32570
4	12403626	12403627	.	1000	-	4.435077	4.823290	12403626	12403627	9.58413	12403626	12403627	5.32570
5	1138362	1138363	.	1000	+	4.452102	4.841639	1138362	1138363	9.58413	1138362	1138363	5.32570
5	2993545	2993546	.	1000	-	4.462151	4.850818	2993545	2993546	9.58413	2993545	2993546	5.32570
2	4672	4673	.	1000	+	4.534014	4.920445	4672	4673	5.44725	4672	4673	9.46223
3	20339658	20339659	.	1000	-	4.532675	4.919473	20339658	20339659	9.10412	20339658	20339659	5.79491
4	12871130	12871131	.	1000	+	4.525301	4.909884	12871130	12871131	9.10412	12871130	12871131	5.79491
2	6642	6643	.	1000	+	4.684192	5.000000	6642	6643	6.68064	6642	6643	8.21430
3	14199309	14199310	.	1000	+	4.704343	5.000000	14199309	14199310	6.68064	14199309	14199310	8.21430
2	13177124	13177125	.	1000	+	4.562816	4.954844	13177124	13177125	8.86363	13177124	13177125	6.02825
3	22747128	22747129	.	1000	+	4.565605	4.956421	22747128	22747129	8.86363	22747128	22747129	6.02825
4	16692818	16692819	.	1000	+	4.549880	4.939901	16692818	16692819	8.86363	16692818	16692819	6.02825
4	17831837	17831838	.	1000	-	4.561592	4.952753	17831837	17831838	8.86363	17831837	17831838	6.02825
5	21632657	21632658	.	1000	-	4.580110	4.975808	21632657	21632658	8.86363	21632657	21632658	6.02825
Pt	105161	105162	.	1000	+	4.563358	4.955894	105161	105162	8.86363	105161	105162	6.02825
3	14199127	14199128	.	1000	+	4.469105	4.858778	14199127	14199128	5.19798	14199127	14199128	9.68813
1	5776204	5776205	.	1000	+	4.622760	5.000000	5776204	5776205	8.62279	5776204	5776205	6.26083
1	29736852	29736853	.	1000	+	4.600542	5.000000	29736852	29736853	8.62279	29736852	29736853	6.26083
5	13833271	13833272	.	1000	+	4.592724	4.994430	13833271	13833272	8.62279	13833271	13833272	6.26083
4	12871145	12871146	.	1000	+	3.758021	4.174077	12871145	12871146	11.73000	12871145	12871146	3.14805
3	14200508	14200509	.	1000	+	4.675739	5.000000	14200508	14200509	6.43545	14200508	14200509	8.44196
3	14202199	14202200	.	1000	+	4.658158	5.000000	14202199	14202200	8.13999	14202199	14202200	6.72396
5	26570215	26570216	.	1000	+	3.646547	4.073390	26570215	26570216	11.96660	26570215	26570216	2.89492
2	5444	5445	.	1000	+	4.629110	5.000000	5444	5445	6.18958	5444	5445	8.66926
3	14198930	14198931	.	1000	+	4.636130	5.000000	14198930	14198931	6.18958	14198930	14198931	8.66926
5	210267	210268	.	1000	+	4.670330	5.000000	210267	210268	7.89798	210267	210268	6.95462
Pt	133830	133831	.	1000	-	4.675162	5.000000	133830	133831	7.89798	133830	133831	6.95462
1	16129623	16129624	.	1000	+	4.697335	5.000000	16129623	16129624	7.65553	16129623	16129624	7.18472
3	14201993	14201994	.	1000	+	4.626277	5.000000	14201993	14201994	5.94297	14201993	14201994	8.89621
3	14201017	14201018	.	1000	+	4.688853	5.000000	14201017	14201018	7.41260	14201017	14201018	7.41431
2	8395	8396	.	1000	+	4.538524	4.928823	8395	8396	5.69555	8395	8396	9.12284
Pt	105057	105058	.	1000	+	4.662210	5.000000	105057	105058	6.92519	105057	105058	7.87209
Pt	133590	133591	.	1000	-	4.676687	5.000000	133590	133591	6.92519	133590	133591	7.87209
3	14198173	14198174	.	1000	+	4.534309	4.920931	14198173	14198174	5.44725	14198173	14198174	9.34917
1	608021	608022	.	1000	-	4.311686	4.710730	608021	608022	10.06290	608021	608022	4.73349
2	676665	676666	.	1000	-	4.296260	4.692656	676665	676666	10.06290	676665	676666	4.73349
2	17731946	17731947	.	1000	-	4.301176	4.699439	17731946	17731947	10.06290	17731946	17731947	4.73349
3	22747119	22747120	.	1000	+	4.296268	4.693010	22747119	22747120	10.06290	22747119	22747120	4.73349
3	20339621	20339622	.	1000	-	4.297113	4.694786	20339621	20339622	10.06290	20339621	20339622	4.73349
4	494751	494752	.	1000	+	4.297747	4.695500	494751	494752	10.06290	494751	494752	4.73349
1	28135562	28135563	.	1000	-	4.251595	4.657855	28135562	28135563	10.30190	28135562	28135563	4.49447
1	13210332	13210333	.	1000	+	4.361681	4.757694	13210332	13210333	9.82368	13210332	13210333	4.97122
1	21031989	21031990	.	1000	+	4.379954	4.775925	21031989	21031990	9.82368	21031989	21031990	4.97122
3	4061050	4061051	.	1000	-	4.372299	4.769130	4061050	4061051	9.82368	4061050	4061051	4.97122
3	5468621	5468622	.	1000	-	4.367216	4.763189	5468621	5468622	9.82368	5468621	5468622	4.97122
4	13469797	13469798	.	1000	+	4.383084	4.778742	13469797	13469798	9.82368	13469797	13469798	4.97122
4	18258548	18258549	.	1000	+	4.358982	4.756132	18258548	18258549	9.82368	18258548	18258549	4.97122
3	20339678	20339679	.	1000	-	4.179896	4.582374	20339678	20339679	10.54070	20339678	20339679	4.25402
4	6796952	6796953	.	1000	+	4.189243	4.592924	6796952	6796953	10.54070	6796952	6796953	4.25402
2	15634667	15634668	.	1000	-	4.416841	4.809102	15634667	15634668	9.58413	15634667	15634668	5.20780
4	7522601	7522602	.	1000	+	4.408898	4.802844	7522601	7522602	9.58413	7522601	7522602	5.20780
5	9807486	9807487	.	1000	-	4.405315	4.798296	9807486	9807487	9.58413	9807486	9807487	5.20780
5	18662934	18662935	.	1000	-	4.405528	4.799530	18662934	18662935	9.58413	18662934	18662935	5.20780
2	14523562	14523563	.	1000	-	4.097274	4.504385	14523562	14523563	10.77910	14523562	14523563	4.01193
3	20705247	20705248	.	1000	+	4.097717	4.505218	20705247	20705248	10.77910	20705247	20705248	4.01193
2	19244998	19244999	.	1000	+	4.459753	4.849066	19244998	19244999	9.34428	19244998	19244999	5.44334
2	16570889	16570890	.	1000	-	4.478011	4.868214	16570889	16570890	9.34428	16570889	16570890	5.44334
3	5669546	5669547	.	1000	-	4.442652	4.832151	5669546	5669547	9.34428	5669546	5669547	5.44334
Pt	104692	104693	.	1000	+	4.454967	4.845123	104692	104693	9.34428	104692	104693	5.44334
2	10669924	10669925	.	1000	+	4.497180	4.883216	10669924	10669925	9.10412	10669924	10669925	5.67794
3	19506778	19506779	.	1000	+	4.487896	4.875020	19506778	19506779	9.10412	19506778	19506779	5.67794
4	7522510	7522511	.	1000	+	4.498683	4.884131	7522510	7522511	9.10412	7522510	7522511	5.67794
3	20339668	20339669	.	1000	-	4.559640	4.950155	20339668	20339669	8.62279	20339668	20339669	6.14463
2	6537	6538	.	1000	+	4.643752	5.000000	6537	6538	6.43545	6537	6538	8.32818
3	14200246	14200247	.	1000	+	4.661096	5.000000	14200246	14200247	6.43545	14200246	14200247	8.32818
3	14201141	14201142	.	1000	+	4.631389	5.000000	14201141	14201142	6.43545	14201141	14201142	8.32818
3	23053622	23053623	.	1000	+	4.621170	5.000000	23053622	23053623	8.38159	23053622	23053623	6.37686
4	2672046	2672047	.	1000	-	4.597803	4.999071	2672046	2672047	8.38159	2672046	2672047	6.37686
5	24282220	24282221	.	1000	+	4.588451	4.988123	24282220	24282221	8.38159	24282220	24282221	6.37686
Pt	133841	133842	.	1000	-	4.622483	5.000000	133841	133842	8.13999	133841	133842	6.60842
3	14198709	14198710	.	1000	+	4.633489	5.000000	14198709	14198710	6.18958	14198709	14198710	8.55565
Pt	104806	104807	.	1000	+	4.635089	5.000000	104806	104807	7.89798	104806	104807	6.83936
Pt	104817	104818	.	1000	+	4.633026	5.000000	104817	104818	7.89798	104817	104818	6.83936
2	8022	8023	.	1000	+	4.583001	4.980803	8022	8023	5.94297	8022	8023	8.78278
3	14202611	14202612	.	1000	+	4.575451	4.971962	14202611	14202612	5.94297	14202611	14202612	8.78278
3	14202329	14202330	.	1000	+	4.670630	5.000000	14202329	14202330	7.65553	14202329	14202330	7.06974
Pt	104703	104704	.	1000	+	4.652732	5.000000	104703	104704	7.65553	104703	104704	7.06974
Pt	130696	130697	.	1000	-	4.669999	5.000000	130696	130697	7.65553	130696	130697	7.06974
2	8731	8732	.	1000	+	4.691616	5.000000	8731	8732	7.41260	8731	8732	7.29958
2	4805	4806	.	1000	+	4.568069	4.961168	4805	4806	5.69555	4805	4806	9.00957
3	9827807	9827808	.	1000	+	4.569046	4.962234	9827807	9827808	5.69555	9827807	9827808	9.00957
3	14198936	14198937	.	1000	+	4.590382	4.990402	14198936	14198937	5.69555	14198936	14198937	9.00957
3	14202366	14202367	.	1000	+	4.585359	4.984165	14202366	14202367	5.69555	14202366	14202367	9.00957
3	14203408	14203409	.	1000	+	4.574488	4.970322	14203408	14203409	5.69555	14203408	14203409	9.00957
2	4202	4203	.	1000	+	4.492949	4.879574	4202	4203	5.44725	4202	4203	9.23605
3	14198237	14198238	.	1000	+	4.500987	4.886879	14198237	14198238	5.44725	14198237	14198238	9.23605
2	6949	6950	.	1000	+	4.647323	5.000000	6949	6950	6.92519	6949	6950	7.75781
2	8024	8025	.	1000	+	4.664353	5.000000	8024	8025	6.92519	8024	8025	7.75781
1	6542240	6542241	.	1000	+	4.183907	4.588245	6542240	6542241	10.30190	6542240	6542241	4.37444
3	6625450	6625451	.	1000	-	4.182818	4.587000	6625450	6625451	10.30190	6625450	6625451	4.37444
1	20440962	20440963	.	1000	+	4.330401	4.728216	20440962	20440963	9.82368	20440962	20440963	4.85251
3	4824073	4824074	.	1000	+	4.344509	4.742204	4824073	4824074	9.82368	4824073	4824074	4.85251
3	4061081	4061082	.	1000	-	4.342115	4.739143	4061081	4061082	9.82368	4061081	4061082	4.85251
3	22747143	22747144	.	1000	+	4.122646	4.526492	22747143	22747144	10.54070	22747143	22747144	4.13319
2	5852596	5852597	.	1000	+	4.381575	4.777936	5852596	5852597	9.58413	5852596	5852597	5.08965
1	16129629	16129630	.	1000	+	4.434190	4.822452	16129629	16129630	9.34428	16129629	16129630	5.32570
2	9638579	9638580	.	1000	+	4.417205	4.809936	9638579	9638580	9.34428	9638579	9638580	5.32570
2	13019236	13019237	.	1000	-	4.405965	4.800357	13019236	13019237	9.34428	13019236	13019237	5.32570
1	25877040	25877041	.	1000	-	4.037883	4.443084	25877040	25877041	10.77910	25877040	25877041	3.89022
5	6079057	6079058	.	1000	+	4.060985	4.464779	6079057	6079058	10.77910	6079057	6079058	3.89022
3	14199042	14199043	.	1000	+	4.631841	5.000000	14199042	14199043	6.68064	14199042	14199043	7.98626
3	14200896	14200897	.	1000	+	4.669284	5.000000	14200896	14200897	6.68064	14200896	14200897	7.98626
3	14200920	14200921	.	1000	+	4.633983	5.000000	14200920	14200921	6.68064	14200920	14200921	7.98626
1	20968136	20968137	.	1000	-	4.464404	4.853901	20968136	20968137	9.10412	20968136	20968137	5.56075
4	14202877	14202878	.	1000	-	4.457195	4.846874	14202877	14202878	9.10412	14202877	14202878	5.56075
2	14523515	14523516	.	1000	-	4.506707	4.894316	14523515	14523516	8.86363	14523515	14523516	5.79491
5	210304	210305	.	1000	+	4.496396	4.881849	210304	210305	8.86363	210304	210305	5.79491
5	6851620	6851621	.	1000	-	4.535180	4.922885	6851620	6851621	8.62279	6851620	6851621	6.02825
2	6275	6276	.	1000	+	4.645806	5.000000	6275	6276	6.43545	6275	6276	8.21430
2	8410	8411	.	1000	+	4.660105	5.000000	8410	8411	6.43545	8410	8411	8.21430
4	12009394	12009395	.	1000	+	4.566392	4.957468	12009394	12009395	8.38159	12009394	12009395	6.26083
Pt	102155	102156	.	1000	+	4.430517	4.819944	102155	102156	4.94764	102155	102156	9.68813
3	7376699	7376700	.	1000	-	4.584179	4.981922	7376699	7376700	8.13999	7376699	7376700	6.49272
Pt	107630	107631	.	1000	+	4.580699	4.978571	107630	107631	8.13999	107630	107631	6.49272
Pt	131017	131018	.	1000	-	4.597542	4.998490	131017	131018	8.13999	131017	131018	6.49272
2	6657	6658	.	1000	+	4.601997	5.000000	6657	6658	6.18958	6657	6658	8.44196
3	14201430	14201431	.	1000	+	4.622353	5.000000	14201430	14201431	6.18958	14201430	14201431	8.44196
Pt	105835	105836	.	1000	+	4.625478	5.000000	105835	105836	6.18958	105835	105836	8.44196
Pt	132812	132813	.	1000	-	4.605495	5.000000	132812	132813	6.18958	132812	132813	8.44196
1	29736850	29736851	.	1000	+	4.610590	5.000000	29736850	29736851	5.94297	29736850	29736851	8.66926
2	8640	8641	.	1000	+	4.592919	4.995009	8640	8641	5.94297	8640	8641	8.66926
Pt	107951	107952	.	1000	+	4.642172	5.000000	107951	107952	7.65553	107951	107952	6.95462
Pt	133944	133945	.	1000	-	4.623208	5.000000	133944	133945	7.65553	133944	133945	6.95462
3	14197887	14197888	.	1000	+	4.296357	4.693364	14197887	14197888	4.69612	14197887	14197888	9.91376
Pt	133598	133599	.	1000	-	4.644638	5.000000	133598	133599	7.41260	133598	133599	7.18472
2	3986	3987	.	1000	+	4.530510	4.916570	3986	3987	5.69555	3986	3987	8.89621
2	8425	8426	.	1000	+	4.514682	4.900867	8425	8426	5.69555	8425	8426	8.89621
2	9437	9438	.	1000	+	4.573481	4.968690	9437	9438	5.69555	9437	9438	8.89621
3	14197957	14197958	.	1000	+	4.558950	4.949637	14197957	14197958	5.69555	14197957	14197958	8.89621
3	14198776	14198777	.	1000	+	4.557607	4.948601	14198776	14198777	5.69555	14198776	14198777	8.89621
3	14199005	14199006	.	1000	+	4.562275	4.953797	14199005	14199006	5.69555	14199005	14199006	8.89621
3	14202702	14202703	.	1000	+	4.651320	5.000000	14202702	14202703	7.16917	14202702	14202703	7.41431
3	14200983	14200984	.	1000	+	4.656784	5.000000	14200983	14200984	6.92519	14200983	14200984	7.64343
3	19913834	19913835	.	1000	-	4.235159	4.641011	19913834	19913835	10.06290	19913834	19913835	4.49447
4	1441808	1441809	.	1000	+	4.220368	4.627895	1441808	1441809	10.06290	1441808	1441809	4.49447
5	24282238	24282239	.	1000	+	4.232656	4.637974	24282238	24282239	10.06290	24282238	24282239	4.49447
3	17231117	17231118	.	1000	+	4.302564	4.701604	17231117	17231118	9.82368	17231117	17231118	4.73349
4	13469789	13469790	.	1000	+	4.302570	4.701966	13469789	13469790	9.82368	13469789	13469790	4.73349
5	25750271	25750272	.	1000	+	4.284562	4.682087	25750271	25750272	9.82368	25750271	25750272	4.73349
5	20097979	20097980	.	1000	-	4.273775	4.671358	20097979	20097980	9.82368	20097979	20097980	4.73349
1	16129644	16129645	.	1000	+	4.185519	4.589805	16129644	16129645	10.30190	16129644	16129645	4.25402
4	12871146	12871147	.	1000	+	4.175858	4.579618	12871146	12871147	10.30190	12871146	12871147	4.25402
1	8069231	8069232	.	1000	+	4.340461	4.736116	8069231	8069232	9.58413	8069231	8069232	4.97122
3	4824012	4824013	.	1000	+	4.357797	4.754960	4824012	4824013	9.58413	4824012	4824013	4.97122
1	19475081	19475082	.	1000	-	4.072456	4.477863	19475081	19475082	10.54070	19475081	19475082	4.01193
5	7016402	7016403	.	1000	+	4.097734	4.505774	7016402	7016403	10.54070	7016402	7016403	4.01193
4	17831813	17831814	.	1000	-	4.383374	4.779547	17831813	17831814	9.34428	17831813	17831814	5.20780
5	22943900	22943901	.	1000	-	4.392003	4.787237	22943900	22943901	9.34428	22943900	22943901	5.20780
1	3918030	3918031	.	1000	+	4.450897	4.839909	3918030	3918031	9.10412	3918030	3918031	5.44334
1	11410980	11410981	.	1000	-	4.432915	4.820780	11410980	11410981	9.10412	11410980	11410981	5.44334
3	5469472	5469473	.	1000	-	4.439058	4.826651	5469472	5469473	9.10412	5469472	5469473	5.44334
3	14198396	14198397	.	1000	+	4.452581	4.842508	14198396	14198397	5.19798	14198396	14198397	9.34917
1	16129612	16129613	.	1000	+	4.483151	4.871845	16129612	16129613	8.86363	16129612	16129613	5.67794
4	7522554	7522555	.	1000	+	4.504147	4.891977	7522554	7522555	8.86363	7522554	7522555	5.67794
4	18149075	18149076	.	1000	+	4.488412	4.875473	18149075	18149076	8.86363	18149075	18149076	5.67794
1	19455583	19455584	.	1000	+	3.914844	4.330405	19455583	19455584	11.01730	19455583	19455584	3.52193
2	1800387	1800388	.	1000	-	3.893965	4.307844	1800387	1800388	11.01730	1800387	1800388	3.52193
3	14201573	14201574	.	1000	+	4.604647	5.000000	14201573	14201574	6.43545	14201573	14201574	8.10033
1	25049272	25049273	.	1000	-	4.528563	4.913214	25049272	25049273	8.62279	25049272	25049273	5.91168
4	1441788	1441789	.	1000	+	4.523575	4.908935	1441788	1441789	8.62279	1441788	1441789	5.91168
4	17831807	17831808	.	1000	-	4.515724	4.903230	17831807	17831808	8.62279	17831807	17831808	5.91168
2	8737713	8737714	.	1000	+	4.531966	4.918019	8737713	8737714	8.38159	8737713	8737714	6.14463
3	5669644	5669645	.	1000	-	4.535539	4.923376	5669644	5669645	8.38159	5669644	5669645	6.14463
2	8469	8470	.	1000	+	4.615367	5.000000	8469	8470	6.18958	8469	8470	8.32818
3	14199415	14199416	.	1000	+	4.604938	5.000000	14199415	14199416	6.18958	14199415	14199416	8.32818
3	14202440	14202441	.	1000	+	4.630388	5.000000	14202440	14202441	6.18958	14202440	14202441	8.32818
5	3284340	3284341	.	1000	-	4.572286	4.966527	3284340	3284341	8.13999	3284340	3284341	6.37686
2	6928	6929	.	1000	+	4.598888	5.000000	6928	6929	7.89798	6928	6929	6.60842
Pt	133627	133628	.	1000	-	4.596647	4.997330	133627	133628	7.89798	133627	133628	6.60842
2	3916	3917	.	1000	+	4.282571	4.679995	3916	3917	4.69612	3916	3917	9.80098
3	14199128	14199129	.	1000	+	4.603706	5.000000	14199128	14199129	7.65553	14199128	14199129	6.83936
4	7522543	7522544	.	1000	+	4.624387	5.000000	7522543	7522544	7.16917	7522543	7522544	7.29958
2	4266	4267	.	1000	+	4.474465	4.863702	4266	4267	5.44725	4266	4267	9.00957
2	4549	4550	.	1000	+	4.514975	4.902282	4549	4550	5.44725	4549	4550	9.00957
3	14198520	14198521	.	1000	+	4.522736	4.907986	14198520	14198521	5.44725	14198520	14198521	9.00957
3	14201241	14201242	.	1000	+	4.452137	4.842073	14201241	14201242	5.44725	14201241	14201242	9.00957
3	14201995	14201996	.	1000	+	4.615088	5.000000	14201995	14201996	6.92519	14201995	14201996	7.52893
3	14199445	14199446	.	1000	+	4.061997	4.466073	14199445	14199446	4.18894	14199445	14199446	10.25170
2	6925	6926	.	1000	+	4.591476	4.992697	6925	6926	6.68064	6925	6926	7.75781
3	14202287	14202288	.	1000	+	4.610677	5.000000	14202287	14202288	6.68064	14202287	14202288	7.75781
3	17493516	17493517	.	1000	-	4.237947	4.643385	17493516	17493517	9.82368	17493516	17493517	4.61415
3	20339664	20339665	.	1000	-	4.247155	4.654033	20339664	20339665	9.82368	20339664	20339665	4.61415
5	4762511	4762512	.	1000	+	4.242293	4.648853	4762511	4762512	9.82368	4762511	4762512	4.61415
3	20892205	20892206	.	1000	-	4.182226	4.585451	20892205	20892206	10.06290	20892205	20892206	4.37444
5	5243885	5243886	.	1000	-	4.220378	4.628230	5243885	5243886	10.06290	5243885	5243886	4.37444
3	22975196	22975197	.	1000	+	4.321958	4.721477	22975196	22975197	9.58413	22975196	22975197	4.85251
4	18163626	18163627	.	1000	-	4.312129	4.712203	18163626	18163627	9.58413	18163626	18163627	4.85251
4	12009379	12009380	.	1000	+	4.114871	4.518889	12009379	12009380	10.30190	12009379	12009380	4.13319
2	8913	8914	.	1000	+	4.465998	4.854786	8913	8914	5.19798	8913	8914	9.23605
1	8268701	8268702	.	1000	-	4.366694	4.762796	8268701	8268702	9.34428	8268701	8268702	5.08965
4	8242615	8242616	.	1000	-	4.352840	4.750679	8242615	8242616	9.34428	8242615	8242616	5.08965
5	15378349	15378350	.	1000	-	4.350352	4.747194	15378349	15378350	9.34428	15378349	15378350	5.08965
Pt	133488	133489	.	1000	-	4.357037	4.753791	133488	133489	9.34428	133488	133489	5.08965
1	11214945	11214946	.	1000	-	4.409404	4.804509	11214945	11214946	9.10412	11214945	11214946	5.32570
4	1441807	1441808	.	1000	+	4.407209	4.801186	1441807	1441808	9.10412	1441807	1441808	5.32570
4	2672050	2672051	.	1000	-	4.408113	4.802015	2672050	2672051	9.10412	2672050	2672051	5.32570
2	10327181	10327182	.	1000	-	4.445484	4.836017	10327181	10327182	8.86363	10327181	10327182	5.56075
4	6409549	6409550	.	1000	+	4.441807	4.830025	6409549	6409550	8.86363	6409549	6409550	5.56075
4	8877672	8877673	.	1000	+	4.449108	4.838615	8877672	8877673	8.86363	8877672	8877673	5.56075
4	12871135	12871136	.	1000	+	3.945781	4.356901	12871135	12871136	10.77910	12871135	12871136	3.64525
2	8531	8532	.	1000	+	4.614329	5.000000	8531	8532	6.43545	8531	8532	7.98626
3	14198774	14198775	.	1000	+	4.618456	5.000000	14198774	14198775	6.43545	14198774	14198775	7.98626
3	14202502	14202503	.	1000	+	4.598460	4.999653	14202502	14202503	6.43545	14202502	14202503	7.98626
3	14202781	14202782	.	1000	+	4.612176	5.000000	14202781	14202782	6.43545	14202781	14202782	7.98626
1	2049296	2049297	.	1000	+	4.501743	4.888723	2049296	2049297	8.62279	2049296	2049297	5.79491
2	6656	6657	.	1000	+	4.500165	4.885960	6656	6657	8.62279	6656	6657	5.79491
4	7522555	7522556	.	1000	+	4.479245	4.869121	7522555	7522556	8.62279	7522555	7522556	5.79491
5	18334252	18334253	.	1000	+	4.488687	4.876837	18334252	18334253	8.62279	18334252	18334253	5.79491
2	13177144	13177145	.	1000	+	4.525074	4.909411	13177144	13177145	8.38159	13177144	13177145	6.02825
4	2672044	2672045	.	1000	-	4.537089	4.925345	2672044	2672045	8.38159	2672044	2672045	6.02825
2	5124	5125	.	1000	+	3.931980	4.345152	5124	5125	3.93292	5124	5125	10.47680
2	8521	8522	.	1000	+	4.610820	5.000000	8521	8522	6.18958	8521	8522	8.21430
Pt	133829	133830	.	1000	-	4.555074	4.944486	133829	133830	8.13999	133829	133830	6.26083
1	10723072	10723073	.	1000	+	4.571306	4.965987	10723072	10723073	7.89798	10723072	10723073	6.49272
1	29736827	29736828	.	1000	+	4.580115	4.976358	29736827	29736828	7.89798	29736827	29736828	6.49272
3	14200899	14200900	.	1000	+	4.586785	4.985293	14200899	14200900	7.89798	14200899	14200900	6.49272
5	427213	427214	.	1000	+	4.572670	4.967606	427213	427214	7.89798	427213	427214	6.49272
2	5803	5804	.	1000	+	4.585156	4.983602	5803	5804	5.94297	5803	5804	8.44196
2	8737694	8737695	.	1000	+	4.566722	4.958520	8737694	8737695	5.94297	8737694	8737695	8.44196
3	14200235	14200236	.	1000	+	4.538407	4.928324	14200235	14200236	5.94297	14200235	14200236	8.44196
Pt	105639	105640	.	1000	+	4.548592	4.937875	105639	105640	5.94297	105639	105640	8.44196
2	5873	5874	.	1000	+	4.308006	4.707075	5873	5874	4.69612	5873	5874	9.68813
3	14199844	14199845	.	1000	+	4.252935	4.658900	14199844	14199845	4.69612	14199844	14199845	9.68813
2	5157	5158	.	1000	+	4.590686	4.990974	5157	5158	7.65553	5157	5158	6.72396
4	2672049	2672050	.	1000	-	4.594950	4.996749	2672049	2672050	7.41260	2672049	2672050	6.95462
2	3955	3956	.	1000	+	4.505305	4.892912	3955	3956	5.69555	3955	3956	8.66926
3	14201033	14201034	.	1000	+	4.543340	4.932331	14201033	14201034	5.69555	14201033	14201034	8.66926
3	14201743	14201744	.	1000	+	4.218725	4.625892	14201743	14201744	4.44327	14201743	14201744	9.91376
Pt	105049	105050	.	1000	+	4.606726	5.000000	105049	105050	7.16917	105049	105050	7.18472
2	4254	4255	.	1000	+	4.502177	4.889650	4254	4255	5.44725	4254	4255	8.89621
2	8445	8446	.	1000	+	4.503828	4.891511	8445	8446	5.44725	8445	8446	8.89621
2	6812	6813	.	1000	+	4.621536	5.000000	6812	6813	6.68064	6812	6813	7.64343
3	14193045	14193046	.	1000	+	4.612942	5.000000	14193045	14193046	6.68064	14193045	14193046	7.64343
2	4425	4426	.	1000	+	4.412516	4.806180	4425	4426	5.19798	4425	4426	9.12284
1	24542010	24542011	.	1000	+	4.197216	4.603393	24542010	24542011	9.82368	24542010	24542011	4.49447
1	25263722	25263723	.	1000	+	4.224777	4.631919	25263722	25263723	9.82368	25263722	25263723	4.49447
3	5468631	5468632	.	1000	-	4.209756	4.614357	5468631	5468632	9.82368	5468631	5468632	4.49447
4	9714335	9714336	.	1000	-	4.205758	4.610155	9714335	9714336	9.82368	9714335	9714336	4.49447
1	3136333	3136334	.	1000	-	4.300084	4.697645	3136333	3136334	9.58413	3136333	3136334	4.73349
3	19216137	19216138	.	1000	-	4.270218	4.668616	19216137	19216138	9.58413	19216137	19216138	4.73349
4	9400064	9400065	.	1000	-	4.286674	4.684537	9400064	9400065	9.58413	9400064	9400065	4.73349
5	3563512	3563513	.	1000	+	4.138783	4.540151	3563512	3563513	10.06290	3563512	3563513	4.25402
3	2917991	2917992	.	1000	+	4.341368	4.737249	2917991	2917992	9.34428	2917991	2917992	4.97122
3	2955529	2955530	.	1000	+	4.318086	4.716642	2955529	2955530	9.34428	2955529	2955530	4.97122
4	1441787	1441788	.	1000	+	4.331644	4.729342	1441787	1441788	9.34428	1441787	1441788	4.97122
4	15160472	15160473	.	1000	+	4.078418	4.483726	15160472	15160473	10.30190	15160472	15160473	4.01193
4	12333707	12333708	.	1000	-	4.369860	4.766745	12333707	12333708	9.10412	12333707	12333708	5.20780
5	3284301	3284302	.	1000	-	4.364048	4.761222	3284301	3284302	9.10412	3284301	3284302	5.20780
Pt	133955	133956	.	1000	-	4.382382	4.778339	133955	133956	9.10412	133955	133956	5.20780
1	20963407	20963408	.	1000	+	3.994936	4.403895	20963407	20963408	10.54070	20963407	20963408	3.76800
3	23242757	23242758	.	1000	-	3.984422	4.393633	23242757	23242758	10.54070	23242757	23242758	3.76800
4	6408816	6408817	.	1000	+	3.993652	4.401737	6408816	6408817	10.54070	6408816	6408817	3.76800
2	4803	4804	.	1000	+	4.575475	4.972510	4803	4804	6.43545	4803	4804	7.87209
3	14193038	14193039	.	1000	+	4.579671	4.974711	14193038	14193039	6.43545	14193038	14193039	7.87209
3	14202743	14202744	.	1000	+	4.552881	4.942447	14202743	14202744	6.43545	14202743	14202744	7.87209
4	7522583	7522584	.	1000	+	4.392420	4.787644	7522583	7522584	8.86363	7522583	7522584	5.44334
2	17731924	17731925	.	1000	-	3.880917	4.297456	17731924	17731925	10.77910	17731924	17731925	3.52193
1	16873284	16873285	.	1000	+	4.476125	4.866402	16873284	16873285	8.62279	16873284	16873285	5.67794
1	3136324	3136325	.	1000	-	4.461912	4.850380	3136324	3136325	8.62279	3136324	3136325	5.67794
3	14200627	14200628	.	1000	+	4.476652	4.866855	14200627	14200628	8.62279	14200627	14200628	5.67794
4	1441815	1441816	.	1000	+	4.462304	4.851257	1441815	1441816	8.62279	1441815	1441816	5.67794
5	24282312	24282313	.	1000	+	4.475716	4.865050	24282312	24282313	8.62279	24282312	24282313	5.67794
3	14199095	14199096	.	1000	+	4.014308	4.420100	14199095	14199096	3.93292	14199095	14199096	10.36430
3	14199337	14199338	.	1000	+	4.400121	4.794606	14199337	14199338	4.94764	14199337	14199338	9.34917
Pt	136492	136493	.	1000	-	4.394934	4.790091	136492	136493	4.94764	136492	136493	9.34917
1	25375942	25375943	.	1000	+	4.494889	4.880483	25375942	25375943	8.38159	25375942	25375943	5.91168
2	9829566	9829567	.	1000	-	4.502805	4.890580	9829566	9829567	8.38159	9829566	9829567	5.91168
2	13020151	13020152	.	1000	-	4.468517	4.857888	13020151	13020152	8.38159	13020151	13020152	5.91168
4	11335646	11335647	.	1000	+	3.827458	4.247561	11335646	11335647	11.01730	11335646	11335647	3.27338
3	14202183	14202184	.	1000	+	4.544432	4.934339	14202183	14202184	6.18958	14202183	14202184	8.10033
3	14202381	14202382	.	1000	+	4.583272	4.981362	14202381	14202382	6.18958	14202381	14202382	8.10033
1	2339382	2339383	.	1000	-	4.530474	4.916089	2339382	2339383	8.13999	2339382	2339383	6.14463
4	2672043	2672044	.	1000	-	4.501143	4.887799	2672043	2672044	8.13999	2672043	2672044	6.14463
Pt	104818	104819	.	1000	+	4.492309	4.879118	104818	104819	8.13999	104818	104819	6.14463
Pt	133531	133532	.	1000	-	4.543712	4.933333	133531	133532	7.89798	133531	133532	6.37686
2	6264	6265	.	1000	+	4.556167	4.946537	6264	6265	5.94297	6264	6265	8.32818
3	14199774	14199775	.	1000	+	4.527791	4.912261	14199774	14199775	5.94297	14199774	14199775	8.32818
3	14201029	14201030	.	1000	+	4.545580	4.935854	14201029	14201030	5.94297	14201029	14201030	8.32818
Pt	133008	133009	.	1000	-	4.555537	4.945510	133008	133009	5.94297	133008	133009	8.32818
2	9388	9389	.	1000	+	4.567239	4.960106	9388	9389	7.41260	9388	9389	6.83936
3	14192950	14192951	.	1000	+	4.605429	5.000000	14192950	14192951	7.41260	14192950	14192951	6.83936
2	7193	7194	.	1000	+	4.500096	4.885503	7193	7194	5.69555	7193	7194	8.55565
2	8052	8053	.	1000	+	4.495055	4.880938	8052	8053	5.69555	8052	8053	8.55565
2	8223	8224	.	1000	+	4.539348	4.929323	8223	8224	5.69555	8223	8224	8.55565
2	8939	8940	.	1000	+	4.534759	4.922395	8939	8940	5.69555	8939	8940	8.55565
3	14197926	14197927	.	1000	+	4.481836	4.870938	14197926	14197927	5.69555	14197926	14197927	8.55565
3	14202023	14202024	.	1000	+	4.526728	4.911309	14202023	14202024	5.69555	14202023	14202024	8.55565
2	7772	7773	.	1000	+	4.158873	4.558656	7772	7773	4.44327	7772	7773	9.80098
2	7270	7271	.	1000	+	4.472144	4.861461	7270	7271	5.44725	7270	7271	8.78278
2	5234	5235	.	1000	+	3.737831	4.153373	5234	5235	3.41482	5234	5235	10.81390
2	8701	8702	.	1000	+	4.594560	4.996168	8701	8702	6.92519	8701	8702	7.29958
3	14202590	14202591	.	1000	+	4.580414	4.976909	14202590	14202591	6.92519	14202590	14202591	7.29958
3	14202672	14202673	.	1000	+	4.573064	4.968147	14202672	14202673	6.92519	14202672	14202673	7.29958
Pt	107320	107321	.	1000	+	4.084150	4.489353	107320	107321	4.18894	107320	107321	10.02650
3	14200783	14200784	.	1000	+	4.582179	4.980244	14200783	14200784	6.68064	14200783	14200784	7.52893
3	14202741	14202742	.	1000	+	4.447907	4.838182	14202741	14202742	5.19798	14202741	14202742	9.00957
1	27243030	27243031	.	1000	-	4.235373	4.641689	27243030	27243031	9.58413	27243030	27243031	4.61415
1	28547982	28547983	.	1000	-	4.245118	4.651266	28547982	28547983	9.58413	28547982	28547983	4.61415
1	19455542	19455543	.	1000	+	4.160446	4.560712	19455542	19455543	9.82368	19455542	19455543	4.37444
4	7522579	7522580	.	1000	+	4.159268	4.559535	7522579	7522580	9.82368	7522579	7522580	4.37444
5	7016414	7016415	.	1000	+	4.195042	4.601150	7016414	7016415	9.82368	7016414	7016415	4.37444
1	16873286	16873287	.	1000	+	4.297139	4.695143	16873286	16873287	9.34428	16873286	16873287	4.85251
5	24660272	24660273	.	1000	+	4.300041	4.697287	24660272	24660273	9.34428	24660272	24660273	4.85251
1	16873230	16873231	.	1000	+	4.128714	4.531020	16873230	16873231	10.06290	16873230	16873231	4.13319
1	4003341	4003342	.	1000	+	4.357200	4.754569	4003341	4003342	9.10412	4003341	4003342	5.08965
3	19952839	19952840	.	1000	+	4.347696	4.744888	19952839	19952840	9.10412	19952839	19952840	5.08965
5	22038359	22038360	.	1000	+	4.346522	4.743738	22038359	22038360	9.10412	22038359	22038360	5.08965
3	14201549	14201550	.	1000	+	4.580050	4.975259	14201549	14201550	6.43545	14201549	14201550	7.75781
2	16570876	16570877	.	1000	-	4.029811	4.434102	16570876	16570877	10.30190	16570876	16570877	3.89022
3	14199807	14199808	.	1000	+	3.555408	3.983564	14199807	14199808	3.15208	14199807	14199808	11.03840
1	3018073	3018074	.	1000	+	4.394001	4.789273	3018073	3018074	8.86363	3018073	3018074	5.32570
5	4762487	4762488	.	1000	+	4.389775	4.784396	4762487	4762488	8.86363	4762487	4762488	5.32570
5	3284261	3284262	.	1000	-	3.960506	4.369839	3284261	3284262	10.54070	3284261	3284262	3.64525
1	29736882	29736883	.	1000	+	4.404130	4.796657	29736882	29736883	8.62279	29736882	29736883	5.56075
2	8760540	8760541	.	1000	+	4.418390	4.811190	8760540	8760541	8.62279	8760540	8760541	5.56075
1	21464078	21464079	.	1000	-	3.839084	4.258007	21464078	21464079	10.77910	21464078	21464079	3.39799
1	11214946	11214947	.	1000	-	4.470390	4.860564	11214946	11214947	8.38159	11214946	11214947	5.79491
2	2587780	2587781	.	1000	-	4.438576	4.826230	2587780	2587781	8.38159	2587780	2587781	5.79491
3	3674029	3674030	.	1000	+	4.455473	4.845560	3674029	3674030	8.38159	3674029	3674030	5.79491
3	22975198	22975199	.	1000	+	4.463407	4.852136	22975198	22975199	8.38159	22975198	22975199	5.79491
3	14201392	14201393	.	1000	+	4.537186	4.926333	14201392	14201393	6.18958	14201392	14201393	7.98626
5	17828707	17828708	.	1000	-	4.499255	4.884588	17828707	17828708	8.13999	17828707	17828708	6.02825
2	8459	8460	.	1000	+	4.516419	4.903705	8459	8460	5.94297	8459	8460	8.21430
1	29736845	29736846	.	1000	+	4.540640	4.931328	29736845	29736846	7.65553	29736845	29736846	6.49272
4	1229233	1229234	.	1000	-	4.546156	4.936359	1229233	1229234	7.65553	1229233	1229234	6.49272
5	16147716	16147717	.	1000	-	4.548848	4.938380	16147716	16147717	7.65553	16147716	16147717	6.49272
2	9145	9146	.	1000	+	4.511133	4.897122	9145	9146	5.69555	9145	9146	8.44196
3	14201164	14201165	.	1000	+	4.468749	4.858333	14201164	14201165	5.69555	14201164	14201165	8.44196
3	14202194	14202195	.	1000	+	4.514592	4.900398	14202194	14202195	5.69555	14202194	14202195	8.44196
3	14202910	14202911	.	1000	+	4.472399	4.861908	14202910	14202911	5.69555	14202910	14202911	8.44196
3	14203359	14203360	.	1000	+	4.548432	4.937370	14203359	14203360	7.41260	14203359	14203360	6.72396
4	6409530	6409531	.	1000	+	4.540118	4.930825	6409530	6409531	7.41260	6409530	6409531	6.72396
3	5669609	5669610	.	1000	-	4.557488	4.948085	5669609	5669610	7.16917	5669609	5669610	6.95462
3	14198225	14198226	.	1000	+	4.454945	4.844687	14198225	14198226	5.44725	14198225	14198226	8.66926
3	14200996	14200997	.	1000	+	4.462780	4.851696	14200996	14200997	5.44725	14200996	14200997	8.66926
3	14202416	14202417	.	1000	+	4.458335	4.848189	14202416	14202417	5.44725	14202416	14202417	8.66926
2	5474	5475	.	1000	+	4.145365	4.545600	5474	5475	4.18894	5474	5475	9.91376
3	14199427	14199428	.	1000	+	4.061606	4.465814	14199427	14199428	4.18894	14199427	14199428	9.91376
2	8619	8620	.	1000	+	4.581229	4.979128	8619	8620	6.68064	8619	8620	7.41431
2	9483	9484	.	1000	+	4.572562	4.967066	9483	9484	6.68064	9483	9484	7.41431
3	14203454	14203455	.	1000	+	4.566754	4.959047	14203454	14203455	6.68064	14203454	14203455	7.41431
Pt	132495	132496	.	1000	-	4.406271	4.800771	132495	132496	5.19798	132495	132496	8.89621
3	14201584	14201585	.	1000	+	4.550926	4.940919	14201584	14201585	6.43545	14201584	14201585	7.64343
Pt	104799	104800	.	1000	+	4.549821	4.939393	104799	104800	6.43545	104799	104800	7.64343
Pt	133848	133849	.	1000	-	4.557890	4.949119	133848	133849	6.43545	133848	133849	7.64343
1	8268585	8268586	.	1000	-	4.193165	4.599551	8268585	8268586	9.58413	8268585	8268586	4.49447
4	737395	737396	.	1000	-	4.200799	4.606286	737395	737396	9.58413	737395	737396	4.49447
5	16912509	16912510	.	1000	-	4.217319	4.624561	16912509	16912510	9.58413	16912509	16912510	4.49447
1	16873285	16873286	.	1000	+	4.257459	4.662033	16873285	16873286	9.34428	16873285	16873286	4.73349
3	22747091	22747092	.	1000	+	4.272419	4.669300	22747091	22747092	9.34428	22747091	22747092	4.73349
4	1441793	1441794	.	1000	+	4.280945	4.677912	1441793	1441794	9.34428	1441793	1441794	4.73349
4	9644808	9644809	.	1000	-	4.252256	4.658551	9644808	9644809	9.34428	9644808	9644809	4.73349
1	2637821	2637822	.	1000	+	4.151256	4.550790	2637821	2637822	9.82368	2637821	2637822	4.25402
3	2917984	2917985	.	1000	+	4.133383	4.535576	2917984	2917985	9.82368	2917984	2917985	4.25402
1	16129621	16129622	.	1000	+	4.333779	4.730468	16129621	16129622	9.10412	16129621	16129622	4.97122
3	2917967	2917968	.	1000	+	4.334841	4.731594	2917967	2917968	9.10412	2917967	2917968	4.97122
2	8383523	8383524	.	1000	+	4.079067	4.484260	8383523	8383524	10.06290	8383523	8383524	4.01193
4	14202891	14202892	.	1000	-	4.066952	4.471548	14202891	14202892	10.06290	14202891	14202892	4.01193
3	14198369	14198370	.	1000	+	3.912800	4.328414	14198369	14198370	3.93292	14198369	14198370	10.13910
1	10472881	10472882	.	1000	-	4.362906	4.760434	10472881	10472882	8.86363	10472881	10472882	5.20780
5	1138346	1138347	.	1000	+	3.967612	4.376253	1138346	1138347	10.30190	1138346	1138347	3.76800
1	11214936	11214937	.	1000	-	4.395214	4.790909	11214936	11214937	8.62279	11214936	11214937	5.44334
5	210288	210289	.	1000	+	4.402781	4.795839	210288	210289	8.62279	210288	210289	5.44334
5	26570170	26570171	.	1000	+	4.369519	4.766349	26570170	26570171	8.62279	26570170	26570171	5.44334
2	7421	7422	.	1000	+	4.512053	4.898056	7421	7422	6.18958	7421	7422	7.87209
3	14199302	14199303	.	1000	+	4.515590	4.902756	14199302	14199303	6.18958	14199302	14199303	7.87209
1	16127169	16127170	.	1000	+	4.426429	4.815368	16127169	16127170	8.38159	16127169	16127170	5.67794
1	7043324	7043325	.	1000	-	4.445641	4.836448	7043324	7043325	8.38159	7043324	7043325	5.67794
3	5669574	5669575	.	1000	-	4.437017	4.824969	5669574	5669575	8.38159	5669574	5669575	5.67794
4	17831850	17831851	.	1000	-	4.466868	4.855228	17831850	17831851	8.13999	17831850	17831851	5.91168
2	5441	5442	.	1000	+	4.311451	4.709997	5441	5442	4.69612	5441	5442	9.34917
2	7578	7579	.	1000	+	4.492091	4.878663	7578	7579	5.94297	7578	7579	8.10033
Pt	105116	105117	.	1000	+	4.495621	4.881393	105116	105117	7.89798	105116	105117	6.14463
2	13177121	13177122	.	1000	+	4.512362	4.898525	13177121	13177122	7.65553	13177121	13177122	6.37686
3	14202422	14202423	.	1000	+	4.501722	4.888261	14202422	14202423	7.65553	14202422	14202423	6.37686
Pt	133589	133590	.	1000	-	4.534585	4.921418	133589	133590	7.65553	133589	133590	6.37686
2	14047658	14047659	.	1000	-	4.529216	4.914170	14047658	14047659	7.41260	14047658	14047659	6.60842
3	14198929	14198930	.	1000	+	4.534725	4.921906	14198929	14198930	7.41260	14198929	14198930	6.60842
2	4734	4735	.	1000	+	4.179128	4.581454	4734	4735	4.44327	4734	4735	9.57521
3	14198284	14198285	.	1000	+	4.206553	4.611445	14198284	14198285	4.44327	14198284	14198285	9.57521
3	14198955	14198956	.	1000	+	4.563159	4.955369	14198955	14198956	7.16917	14198955	14198956	6.83936
4	14202899	14202900	.	1000	-	4.556258	4.947051	14202899	14202900	7.16917	14202899	14202900	6.83936
3	14199827	14199828	.	1000	+	3.739509	4.154751	14199827	14199828	3.41482	14199827	14199828	10.58920
1	6944955	6944956	.	1000	+	4.529497	4.914648	6944955	6944956	6.92519	6944955	6944956	7.06974
Pt	131327	131328	.	1000	-	4.064746	4.469977	131327	131328	4.18894	131327	131328	9.80098
3	14197829	14197830	.	1000	+	4.396209	4.791319	14197829	14197830	5.19798	14197829	14197830	8.78278
Pt	106152	106153	.	1000	+	4.386571	4.782377	106152	106153	5.19798	106152	106153	8.78278
3	14199205	14199206	.	1000	+	3.449198	3.875943	14199205	14199206	3.15208	14199205	14199206	10.81390
2	7012	7013	.	1000	+	4.527968	4.912737	7012	7013	6.43545	7012	7013	7.52893
3	14203447	14203448	.	1000	+	4.560475	4.951711	14203447	14203448	6.43545	14203447	14203448	7.52893
2	4398	4399	.	1000	+	3.941223	4.354178	4398	4399	3.93292	4398	4399	10.02650
1	11661635	11661636	.	1000	+	4.173430	4.575956	11661635	11661636	9.58413	11661635	11661636	4.37444
1	12024565	12024566	.	1000	+	4.171697	4.573233	12024565	12024566	9.58413	12024565	12024566	4.37444
1	8268665	8268666	.	1000	-	4.161141	4.561890	8268665	8268666	9.58413	8268665	8268666	4.37444
1	18591306	18591307	.	1000	-	4.169251	4.570827	18591306	18591307	9.58413	18591306	18591307	4.37444
2	19244994	19244995	.	1000	+	4.159123	4.559242	19244994	19244995	9.58413	19244994	19244995	4.37444
2	14523560	14523561	.	1000	-	4.166743	4.567838	14523560	14523561	9.58413	14523560	14523561	4.37444
3	17231112	17231113	.	1000	+	4.163715	4.565451	17231112	17231113	9.58413	17231112	17231113	4.37444
4	6801810	6801811	.	1000	+	4.174439	4.577477	6801810	6801811	9.58413	6801810	6801811	4.37444
1	16129627	16129628	.	1000	+	4.248301	4.654727	16129627	16129628	9.34428	16129627	16129628	4.61415
1	27243068	27243069	.	1000	-	4.240831	4.647139	27243068	27243069	9.34428	27243068	27243069	4.61415
3	9528295	9528296	.	1000	+	4.237666	4.643046	9528295	9528296	9.34428	9528295	9528296	4.61415
3	22747108	22747109	.	1000	+	4.211481	4.617615	22747108	22747109	9.34428	22747108	22747109	4.61415
5	21632622	21632623	.	1000	-	4.215782	4.623894	21632622	21632623	9.34428	21632622	21632623	4.61415
2	5366	5367	.	1000	+	4.352877	4.751067	5366	5367	4.94764	5366	5367	9.00957
3	14198540	14198541	.	1000	+	4.311491	4.710364	14198540	14198541	4.94764	14198540	14198541	9.00957
1	6457322	6457323	.	1000	-	4.277056	4.674802	6457322	6457323	9.10412	6457322	6457323	4.85251
5	210310	210311	.	1000	+	4.260672	4.663774	210310	210311	9.10412	210310	210311	4.85251
5	16609250	16609251	.	1000	-	4.272478	4.669642	16609250	16609251	9.10412	16609250	16609251	4.85251
1	10723084	10723085	.	1000	+	4.324508	4.723348	10723084	10723085	8.86363	10723084	10723085	5.08965
1	16129626	16129627	.	1000	+	4.331172	4.728591	16129626	16129627	8.86363	16129626	16129627	5.08965
4	6409551	6409552	.	1000	+	4.321563	4.720730	6409551	6409552	8.86363	6409551	6409552	5.08965
4	6409559	6409560	.	1000	+	4.323704	4.722600	6409559	6409560	8.86363	6409559	6409560	5.08965
5	1138374	1138375	.	1000	+	4.325376	4.724096	1138374	1138375	8.86363	1138374	1138375	5.08965
5	21632706	21632707	.	1000	-	4.310561	4.708901	21632706	21632707	8.86363	21632706	21632707	5.08965
3	5669588	5669589	.	1000	-	4.346141	4.743354	5669588	5669589	8.62279	5669588	5669589	5.32570
4	17831828	17831829	.	1000	-	4.356317	4.752626	17831828	17831829	8.62279	17831828	17831829	5.32570
2	5331	5332	.	1000	+	4.527185	4.911785	5331	5332	6.18958	5331	5332	7.75781
3	22747092	22747093	.	1000	+	4.408994	4.803260	22747092	22747093	8.38159	22747092	22747093	5.56075
4	17831820	17831821	.	1000	-	4.380902	4.777532	17831820	17831821	8.38159	17831820	17831821	5.56075
5	2993541	2993542	.	1000	-	3.827729	4.248362	2993541	2993542	10.54070	2993541	2993542	3.39799
Pt	105113	105114	.	1000	+	4.443340	4.833435	105113	105114	8.13999	105113	105114	5.79491
3	14202430	14202431	.	1000	+	4.475154	4.864151	14202430	14202431	5.94297	14202430	14202431	7.98626
1	19687831	19687832	.	1000	+	3.703244	4.119909	19687831	19687832	10.77910	19687831	19687832	3.14805
1	16129628	16129629	.	1000	+	4.480302	4.870029	16129628	16129629	7.89798	16129628	16129629	6.02825
5	16677323	16677324	.	1000	+	4.502482	4.890114	16677323	16677324	7.65553	16677323	16677324	6.26083
Pt	133887	133888	.	1000	-	4.490767	4.878207	133887	133888	7.65553	133887	133888	6.26083
2	5034	5035	.	1000	+	4.427447	4.816199	5034	5035	5.69555	5034	5035	8.21430
2	4313	4314	.	1000	+	4.146357	4.546463	4313	4314	4.44327	4313	4314	9.46223
2	8631	8632	.	1000	+	4.411340	4.805346	8631	8632	5.44725	8631	8632	8.44196
3	14203116	14203117	.	1000	+	4.442747	4.832579	14203116	14203117	5.44725	14203116	14203117	8.44196
3	14201248	14201249	.	1000	+	4.518376	4.905606	14201248	14201249	6.92519	14201248	14201249	6.95462
3	14202539	14202540	.	1000	+	4.544163	4.933836	14202539	14202540	6.92519	14202539	14202540	6.95462
Pt	133883	133884	.	1000	-	4.520462	4.907035	133883	133884	6.92519	133883	133884	6.95462
2	4347	4348	.	1000	+	4.038401	4.443838	4347	4348	4.18894	4347	4348	9.68813
2	5456	5457	.	1000	+	4.060865	4.464521	5456	5457	4.18894	5456	5457	9.68813
3	14202745	14202746	.	1000	+	2.066993	2.574026	14202745	14202746	12.43710	14202745	14202746	1.43862
2	3858	3859	.	1000	+	4.418784	4.811609	3858	3859	5.19798	3858	3859	8.66926
3	14197832	14197833	.	1000	+	4.368912	4.765557	14197832	14197833	5.19798	14197832	14197833	8.66926
2	5836	5837	.	1000	+	3.556730	3.984416	5836	5837	3.15208	5836	5837	10.70160
2	9476	9477	.	1000	+	4.502171	4.889186	9476	9477	6.43545	9476	9477	7.41431
1	25049178	25049179	.	1000	-	4.198537	4.604356	25049178	25049179	9.34428	25049178	25049179	4.49447
1	25777964	25777965	.	1000	-	4.177842	4.580842	25777964	25777965	9.34428	25777964	25777965	4.49447
3	2917982	2917983	.	1000	+	4.182848	4.587311	2917982	2917983	9.34428	2917982	2917983	4.49447
3	15265173	15265174	.	1000	+	4.173787	4.576563	15265173	15265174	9.34428	15265173	15265174	4.49447
5	25432690	25432691	.	1000	+	4.192621	4.597960	25432690	25432691	9.34428	25432690	25432691	4.49447
5	26568712	26568713	.	1000	+	4.179938	4.582680	26568712	26568713	9.34428	26568712	26568713	4.49447
1	9207251	9207252	.	1000	+	4.124342	4.527341	9207251	9207252	9.58413	9207251	9207252	4.25402
3	19913800	19913801	.	1000	-	4.122608	4.526209	19913800	19913801	9.58413	19913800	19913801	4.25402
1	10478423	10478424	.	1000	+	4.249957	4.656115	10478423	10478424	9.10412	10478423	10478424	4.73349
4	7522526	7522527	.	1000	+	4.234461	4.639659	7522526	7522527	9.10412	7522526	7522527	4.73349
1	25263719	25263720	.	1000	+	4.068090	4.473383	25263719	25263720	9.82368	25263719	25263720	4.01193
1	26303950	26303951	.	1000	+	4.071844	4.476805	26303950	26303951	9.82368	26303950	26303951	4.01193
5	25390182	25390183	.	1000	-	4.064380	4.469193	25390182	25390183	9.82368	25390182	25390183	4.01193
1	50188	50189	.	1000	-	4.300873	4.698720	50188	50189	8.86363	50188	50189	4.97122
2	12356615	12356616	.	1000	-	4.293365	4.690538	12356615	12356616	8.86363	12356615	12356616	4.97122
3	364067	364068	.	1000	-	4.304340	4.703785	364067	364068	8.86363	364067	364068	4.97122
4	1441814	1441815	.	1000	+	4.303096	4.703056	1441814	1441815	8.86363	1441814	1441815	4.97122
4	18163629	18163630	.	1000	-	4.287594	4.685591	18163629	18163630	8.86363	18163629	18163630	4.97122
5	15382024	15382025	.	1000	-	4.310062	4.708536	15382024	15382025	8.86363	15382024	15382025	4.97122
2	8427	8428	.	1000	+	4.511958	4.897589	8427	8428	6.18958	8427	8428	7.64343
3	5669584	5669585	.	1000	-	4.340620	4.736870	5669584	5669585	8.62279	5669584	5669585	5.20780
5	17243843	17243844	.	1000	+	4.347605	4.744504	17243843	17243844	8.62279	17243843	17243844	5.20780
5	25750218	25750219	.	1000	+	4.327590	4.725219	25750218	25750219	8.62279	25750218	25750219	5.20780
5	4935014	4935015	.	1000	-	4.336218	4.733477	4935014	4935015	8.62279	4935014	4935015	5.20780
3	9796938	9796939	.	1000	+	4.350602	4.747965	9796938	9796939	8.38159	9796938	9796939	5.44334
3	20339655	20339656	.	1000	-	4.375877	4.771921	20339655	20339656	8.38159	20339655	20339656	5.44334
2	9128373	9128374	.	1000	-	3.863193	4.280512	9128373	9128374	10.30190	9128373	9128374	3.52193
2	4674	4675	.	1000	+	4.275011	4.672734	4674	4675	4.69612	4674	4675	9.12284
3	14198645	14198646	.	1000	+	4.220006	4.627227	14198645	14198646	4.69612	14198645	14198646	9.12284
3	9526220	9526221	.	1000	+	4.429714	4.818273	9526220	9526221	8.13999	9526220	9526221	5.67794
3	5669629	5669630	.	1000	-	4.404501	4.797475	5669629	5669630	8.13999	5669629	5669630	5.67794
4	16841829	16841830	.	1000	+	4.403555	4.796248	16841829	16841830	8.13999	16841829	16841830	5.67794
Pt	133534	133535	.	1000	-	4.417501	4.810353	133534	133535	8.13999	133534	133535	5.67794
3	14202492	14202493	.	1000	+	4.482593	4.871391	14202492	14202493	5.94297	14202492	14202493	7.87209
Pt	104820	104821	.	1000	+	4.487191	4.874566	104820	104821	7.65553	104820	104821	6.14463
Pt	104946	104947	.	1000	+	4.467280	4.856111	104946	104947	7.65553	104946	104947	6.14463
Pt	105020	105021	.	1000	+	4.470698	4.861012	105020	105021	7.65553	105020	105021	6.14463
Pt	105058	105059	.	1000	+	4.464789	4.854343	105058	105059	7.65553	105058	105059	6.14463
Pt	133827	133828	.	1000	-	4.461522	4.849942	133827	133828	7.65553	133827	133828	6.14463
3	14198705	14198706	.	1000	+	4.174263	4.576868	14198705	14198706	4.44327	14198705	14198706	9.34917
1	16129636	16129637	.	1000	+	4.485214	4.873207	16129636	16129637	7.41260	16129636	16129637	6.37686
3	22975192	22975193	.	1000	+	4.509212	4.895717	22975192	22975193	7.41260	22975192	22975193	6.37686
4	7522505	7522506	.	1000	+	4.470356	4.860116	7522505	7522506	7.41260	7522505	7522506	6.37686
Pt	107627	107628	.	1000	+	4.467548	4.856998	107627	107628	7.41260	107627	107628	6.37686
Pt	131020	131021	.	1000	-	4.473810	4.863253	131020	131021	7.41260	131020	131021	6.37686
Pt	133891	133892	.	1000	-	4.486016	4.873660	133891	133892	7.41260	133891	133892	6.37686
2	5856	5857	.	1000	+	3.603469	4.029527	5856	5857	3.41482	5856	5857	10.36430
3	14198954	14198955	.	1000	+	4.415359	4.808268	14198954	14198955	5.44725	14198954	14198955	8.32818
3	14202248	14202249	.	1000	+	4.435163	4.823709	14202248	14202249	5.44725	14202248	14202249	8.32818
2	7277	7278	.	1000	+	4.514777	4.901338	7277	7278	6.92519	7277	7278	6.83936
2	8568	8569	.	1000	+	4.514338	4.899461	8568	8569	6.92519	8568	8569	6.83936
3	14200889	14200890	.	1000	+	4.514909	4.901810	14200889	14200890	6.92519	14200889	14200890	6.83936
5	210275	210276	.	1000	+	4.532155	4.918503	210275	210276	6.92519	210275	210276	6.83936
3	14198318	14198319	.	1000	+	4.111274	4.515534	14198318	14198319	4.18894	14198318	14198319	9.57521
3	14198542	14198543	.	1000	+	4.384326	4.780355	14198542	14198543	5.19798	14198542	14198543	8.55565
5	16677292	16677293	.	1000	+	4.500618	4.886419	16677292	16677293	6.68064	16677292	16677293	7.06974
Pt	104764	104765	.	1000	+	4.483370	4.872299	104764	104765	6.68064	104764	104765	7.06974
3	14202614	14202615	.	1000	+	4.509206	4.895250	14202614	14202615	6.43545	14202614	14202615	7.29958
Pt	107628	107629	.	1000	+	4.526253	4.910834	107628	107629	6.43545	107628	107629	7.29958
Pt	131019	131020	.	1000	-	4.506023	4.893847	131019	131020	6.43545	131019	131020	7.29958
3	14202778	14202779	.	1000	+	3.938028	4.351457	14202778	14202779	3.93292	14202778	14202779	9.80098
1	16873272	16873273	.	1000	+	4.147360	4.547327	16873272	16873273	9.34428	16873272	16873273	4.37444
5	659618	659619	.	1000	+	4.148586	4.548480	659618	659619	9.34428	659618	659619	4.37444
3	14202200	14202201	.	1000	+	4.497090	4.882760	14202200	14202201	6.18958	14202200	14202201	7.52893
1	5446632	5446633	.	1000	-	4.229544	4.635615	5446632	5446633	9.10412	5446632	5446633	4.61415
1	19453645	19453646	.	1000	-	4.206448	4.611122	19453645	19453646	9.10412	19453645	19453646	4.61415
4	16233278	16233279	.	1000	-	4.199563	4.605642	16233278	16233279	9.10412	16233278	16233279	4.61415
3	22460393	22460394	.	1000	-	4.062155	4.466591	22460393	22460394	9.58413	22460393	22460394	4.13319
3	1168365	1168366	.	1000	+	4.266326	4.666547	1168365	1168366	8.86363	1168365	1168366	4.85251
3	2917968	2917969	.	1000	+	4.272601	4.669984	2917968	2917969	8.86363	2917968	2917969	4.85251
5	534485	534486	.	1000	+	4.272409	4.668959	534485	534486	8.86363	534485	534486	4.85251
5	5939278	5939279	.	1000	+	4.260909	4.664121	5939278	5939279	8.86363	5939278	5939279	4.85251
1	5446649	5446650	.	1000	-	4.312969	4.712573	5446649	5446650	8.62279	5446649	5446650	5.08965
4	14202903	14202904	.	1000	-	4.304873	4.705244	14202903	14202904	8.62279	14202903	14202904	5.08965
4	15346193	15346194	.	1000	-	3.916258	4.332624	15346193	15346194	10.06290	15346193	15346194	3.64525
1	29486506	29486507	.	1000	-	4.351806	4.749514	29486506	29486507	8.38159	29486506	29486507	5.32570
3	14199000	14199001	.	1000	+	4.238529	4.644065	14199000	14199001	4.69612	14199000	14199001	9.00957
Pt	133559	133560	.	1000	-	4.397991	4.793370	133559	133560	8.13999	133559	133560	5.56075
3	543203	543204	.	1000	+	3.834944	4.253378	543203	543204	10.30190	543203	543204	3.39799
Pt	133701	133702	.	1000	-	4.418044	4.810772	133701	133702	7.89798	133701	133702	5.79491
3	23053636	23053637	.	1000	+	4.457478	4.847312	23053636	23053637	7.65553	23053636	23053637	6.02825
Pt	104760	104761	.	1000	+	4.420451	4.812866	104760	104761	7.65553	104760	104761	6.02825
2	4563	4564	.	1000	+	4.412616	4.806597	4563	4564	5.69555	4563	4564	7.98626
2	7776	7777	.	1000	+	4.442003	4.830449	7776	7777	5.69555	7776	7777	7.98626
3	14201747	14201748	.	1000	+	4.450242	4.839047	14201747	14201748	5.69555	14201747	14201748	7.98626
1	10478044	10478045	.	1000	+	4.455555	4.845998	10478044	10478045	7.41260	10478044	10478045	6.26083
2	8451	8452	.	1000	+	4.454451	4.843815	8451	8452	7.41260	8451	8452	6.26083
Pt	104756	104757	.	1000	+	4.444252	4.834294	104756	104757	7.41260	104756	104757	6.26083
2	4454	4455	.	1000	+	4.390609	4.785610	4454	4455	5.44725	4454	4455	8.21430
2	8277	8278	.	1000	+	4.371826	4.768732	8277	8278	5.44725	8277	8278	8.21430
2	4627	4628	.	1000	+	4.046624	4.451696	4627	4628	4.18894	4627	4628	9.46223
2	6786	6787	.	1000	+	4.041622	4.447882	6786	6787	4.18894	6786	6787	9.46223
3	14198598	14198599	.	1000	+	4.062013	4.466332	14198598	14198599	4.18894	14198598	14198599	9.46223
3	14199762	14199763	.	1000	+	4.116943	4.520569	14199762	14199763	4.18894	14199762	14199763	9.46223
3	14200757	14200758	.	1000	+	4.033663	4.439069	14200757	14200758	4.18894	14200757	14200758	9.46223
2	6918	6919	.	1000	+	4.486635	4.874113	6918	6919	6.92519	6918	6919	6.72396
Pt	133603	133604	.	1000	-	4.499567	4.885045	133603	133604	6.92519	133603	133604	6.72396
2	4571	4572	.	1000	+	4.394991	4.790500	4571	4572	5.19798	4571	4572	8.44196
2	6912	6913	.	1000	+	4.325133	4.723722	6912	6913	5.19798	6912	6913	8.44196
3	14199836	14199837	.	1000	+	4.390066	4.784800	14199836	14199837	5.19798	14199836	14199837	8.44196
3	14200883	14200884	.	1000	+	4.333115	4.730093	14200883	14200884	5.19798	14200883	14200884	8.44196
1	10723043	10723044	.	1000	+	4.489802	4.877750	10723043	10723044	6.68064	10723043	10723044	6.95462
2	4569	4570	.	1000	+	4.298512	4.696572	4569	4570	4.94764	4569	4570	8.66926
2	4565	4566	.	1000	+	4.445864	4.836881	4565	4566	6.18958	4565	4566	7.41431
3	14202398	14202399	.	1000	+	4.453256	4.843379	14202398	14202399	6.18958	14202398	14202399	7.41431
1	25048318	25048319	.	1000	-	4.179495	4.582067	25048318	25048319	9.10412	25048318	25048319	4.49447
1	25048332	25048333	.	1000	-	4.180243	4.582988	25048332	25048333	9.10412	25048332	25048333	4.49447
5	534481	534482	.	1000	+	4.171368	4.572931	534481	534482	9.10412	534481	534482	4.49447
1	3918002	3918003	.	1000	+	4.092718	4.499684	3918002	3918003	9.34428	3918002	3918003	4.25402
5	25021337	25021338	.	1000	-	4.132591	4.535005	25021337	25021338	9.34428	25021337	25021338	4.25402
1	8268651	8268652	.	1000	-	4.234179	4.639322	8268651	8268652	8.86363	8268651	8268652	4.73349
3	20790730	20790731	.	1000	-	4.238859	4.644746	20790730	20790731	8.86363	20790730	20790731	4.73349
3	20790747	20790748	.	1000	-	4.214027	4.621237	20790747	20790748	8.86363	20790747	20790748	4.73349
1	439810	439811	.	1000	+	4.048379	4.452968	439810	439811	9.58413	439810	439811	4.01193
1	26563999	26564000	.	1000	-	4.053543	4.459368	26563999	26564000	9.58413	26563999	26564000	4.01193
5	553915	553916	.	1000	-	4.030953	4.434597	553915	553916	9.58413	553915	553916	4.01193
5	23084011	23084012	.	1000	-	4.250975	4.657507	23084011	23084012	8.62279	23084011	23084012	4.97122
5	4762499	4762500	.	1000	+	3.955535	4.364594	4762499	4762500	9.82368	4762499	4762500	3.76800
2	19368645	19368646	.	1000	+	4.304505	4.704149	19368645	19368646	8.38159	19368645	19368646	5.20780
3	22747109	22747110	.	1000	+	4.313309	4.712942	22747109	22747110	8.38159	22747109	22747110	5.20780
3	2605586	2605587	.	1000	-	4.292768	4.690184	2605586	2605587	8.38159	2605586	2605587	5.20780
4	16534965	16534966	.	1000	-	4.311273	4.709632	16534965	16534966	8.38159	16534965	16534966	5.20780
3	1622928	1622929	.	1000	+	3.890119	4.303394	1622928	1622929	10.06290	1622928	1622929	3.52193
3	150165	150166	.	1000	-	4.353402	4.751847	150165	150166	8.13999	150165	150166	5.44334
Pt	105088	105089	.	1000	+	4.328553	4.725966	105088	105089	8.13999	105088	105089	5.44334
4	7522525	7522526	.	1000	+	4.378803	4.774723	7522525	7522526	7.89798	7522525	7522526	5.67794
3	2917992	2917993	.	1000	+	3.794903	4.212297	2917992	2917993	10.30190	2917992	2917993	3.27338
2	4040	4041	.	1000	+	4.397633	4.792959	4040	4041	5.69555	4040	4041	7.87209
2	4959	4960	.	1000	+	4.429492	4.817443	4959	4960	5.69555	4959	4960	7.87209
2	8389	8390	.	1000	+	4.442477	4.831724	8389	8390	5.69555	8389	8390	7.87209
3	14198011	14198012	.	1000	+	4.420556	4.813285	14198011	14198012	5.69555	14198011	14198012	7.87209
1	2537797	2537798	.	1000	+	4.438148	4.825810	2537797	2537798	7.65553	2537797	2537798	5.91168
1	25048359	25048360	.	1000	-	4.419915	4.812446	25048359	25048360	7.65553	25048359	25048360	5.91168
2	4309	4310	.	1000	+	4.116933	4.520289	4309	4310	4.44327	4309	4310	9.12284
3	14197819	14197820	.	1000	+	4.160822	4.561006	14197819	14197820	4.44327	14197819	14197820	9.12284
1	16873243	16873244	.	1000	+	4.442304	4.831298	16873243	16873244	7.41260	16873243	16873244	6.14463
4	8518067	8518068	.	1000	-	4.443290	4.833007	8518067	8518068	7.41260	8518067	8518068	6.14463
2	4958	4959	.	1000	+	4.425285	4.814952	4958	4959	7.16917	4958	4959	6.37686
4	7522580	7522581	.	1000	+	4.446405	4.837748	7522580	7522581	7.16917	7522580	7522581	6.37686
2	5791	5792	.	1000	+	4.095512	4.502996	5791	5792	4.18894	5791	5792	9.34917
3	14199775	14199776	.	1000	+	4.090294	4.496397	14199775	14199776	4.18894	14199775	14199776	9.34917
Pt	105044	105045	.	1000	+	4.470157	4.859225	105044	105045	6.92519	105044	105045	6.60842
2	7089	7090	.	1000	+	4.345268	4.742588	7089	7090	5.19798	7089	7090	8.32818
3	14192882	14192883	.	1000	+	4.352357	4.750290	14192882	14192883	5.19798	14192882	14192883	8.32818
3	14202602	14202603	.	1000	+	4.358028	4.755350	14202602	14202603	5.19798	14202602	14202603	8.32818
3	14203291	14203292	.	1000	+	4.376724	4.773520	14203291	14203292	5.19798	14203291	14203292	8.32818
2	8737700	8737701	.	1000	+	4.480967	4.870483	8737700	8737701	6.68064	8737700	8737701	6.83936
2	4147	4148	.	1000	+	3.575450	4.005260	4147	4148	3.15208	4147	4148	10.36430
2	6136	6137	.	1000	+	4.477365	4.867308	6136	6137	6.43545	6136	6137	7.06974
2	6279	6280	.	1000	+	4.436390	4.824549	6279	6280	6.43545	6279	6280	7.06974
2	7026	7027	.	1000	+	4.461006	4.849504	7026	7027	6.43545	7026	7027	7.06974
3	14200250	14200251	.	1000	+	4.451592	4.840773	14200250	14200251	6.43545	14200250	14200251	7.06974
2	7783	7784	.	1000	+	4.278041	4.675148	7783	7784	4.94764	7783	7784	8.55565
3	14199416	14199417	.	1000	+	4.285205	4.682786	14199416	14199417	4.94764	14199416	14199417	8.55565
3	14201754	14201755	.	1000	+	4.281081	4.678605	14201754	14201755	4.94764	14201754	14201755	8.55565
3	14202783	14202784	.	1000	+	4.304646	4.704878	14202783	14202784	4.94764	14202783	14202784	8.55565
2	8229	8230	.	1000	+	4.451570	4.840341	8229	8230	6.18958	8229	8230	7.29958
2	8772	8773	.	1000	+	4.435981	4.824129	8772	8773	6.18958	8772	8773	7.29958
3	14198526	14198527	.	1000	+	4.433944	4.822033	14198526	14198527	6.18958	14198526	14198527	7.29958
3	14200794	14200795	.	1000	+	4.433026	4.821197	14200794	14200795	6.18958	14200794	14200795	7.29958
2	4964	4965	.	1000	+	4.231864	4.637636	4964	4965	4.69612	4964	4965	8.78278
1	8263510	8263511	.	1000	+	4.144744	4.545025	8263510	8263511	9.10412	8263510	8263511	4.37444
1	20968160	20968161	.	1000	-	4.193811	4.600510	20968160	20968161	8.86363	20968160	20968161	4.61415
3	14960794	14960795	.	1000	-	4.189972	4.593864	14960794	14960795	8.86363	14960794	14960795	4.61415
5	4762510	4762511	.	1000	+	4.187303	4.590741	4762510	4762511	8.86363	4762510	4762511	4.61415
2	13177126	13177127	.	1000	+	4.085451	4.490701	13177126	13177127	9.34428	13177126	13177127	4.13319
2	6406686	6406687	.	1000	-	4.062901	4.467631	6406686	6406687	9.34428	6406686	6406687	4.13319
1	14026885	14026886	.	1000	+	4.264186	4.665856	14026885	14026886	8.62279	14026885	14026886	4.85251
2	8760542	8760543	.	1000	+	4.248661	4.655074	8760542	8760543	8.62279	8760542	8760543	4.85251
2	9070827	9070828	.	1000	-	4.242075	4.648167	9070827	9070828	8.62279	9070827	9070828	4.85251
3	22612713	22612714	.	1000	+	4.246194	4.652993	22612713	22612714	8.62279	22612713	22612714	4.85251
5	2180587	2180588	.	1000	-	4.237097	4.642029	2180587	2180588	8.62279	2180587	2180588	4.85251
5	6090136	6090137	.	1000	-	4.257187	4.661685	6090136	6090137	8.62279	6090136	6090137	4.85251
4	12333710	12333711	.	1000	-	3.984956	4.394583	12333710	12333711	9.58413	12333710	12333711	3.89022
3	14203057	14203058	.	1000	+	4.454562	4.844251	14203057	14203058	5.94297	14203057	14203058	7.52893
1	8268675	8268676	.	1000	-	4.276612	4.673767	8268675	8268676	8.38159	8268675	8268676	5.08965
1	19475102	19475103	.	1000	-	4.287954	4.685943	19475102	19475103	8.38159	19475102	19475103	5.08965
1	20958947	20958948	.	1000	-	4.295277	4.691598	20958947	20958948	8.38159	20958947	20958948	5.08965
3	19506768	19506769	.	1000	+	4.266301	4.666202	19506768	19506769	8.38159	19506768	19506769	5.08965
3	20339666	20339667	.	1000	-	4.278262	4.675493	20339666	20339667	8.38159	20339666	20339667	5.08965
5	210309	210310	.	1000	+	4.287286	4.685240	210309	210310	8.38159	210309	210310	5.08965
2	1824389	1824390	.	1000	-	3.909030	4.323368	1824389	1824390	9.82368	1824389	1824390	3.64525
3	20339654	20339655	.	1000	-	4.318635	4.717012	20339654	20339655	8.13999	20339654	20339655	5.32570
3	14198534	14198535	.	1000	+	4.404386	4.797066	14198534	14198535	5.69555	14198534	14198535	7.75781
3	14199311	14199312	.	1000	+	4.114391	4.518050	14199311	14199312	4.44327	14199311	14199312	9.00957
1	4016935	4016936	.	1000	-	4.380315	4.776326	4016935	4016936	7.65553	4016935	4016936	5.79491
Pt	105051	105052	.	1000	+	4.385865	4.781164	105051	105052	7.65553	105051	105052	5.79491
5	18314106	18314107	.	1000	+	3.702217	4.118759	18314106	18314107	10.30190	18314106	18314107	3.14805
1	16268688	16268689	.	1000	+	4.430317	4.819526	16268688	16268689	7.41260	16268688	16268689	6.02825
4	186023	186024	.	1000	-	3.602936	4.029076	186023	186024	10.54070	186023	186024	2.89492
2	4453	4454	.	1000	+	4.379153	4.775123	4453	4454	5.44725	4453	4454	7.98626
3	14198424	14198425	.	1000	+	4.362804	4.760041	14198424	14198425	5.44725	14198424	14198425	7.98626
3	14198425	14198426	.	1000	+	4.376273	4.772719	14198425	14198426	5.44725	14198425	14198426	7.98626
3	14200879	14200880	.	1000	+	4.353278	4.751457	14200879	14200880	5.44725	14200879	14200880	7.98626
1	29736865	29736866	.	1000	+	4.439705	4.827492	29736865	29736866	7.16917	29736865	29736866	6.26083
2	13019240	13019241	.	1000	-	4.433205	4.821615	13019240	13019241	7.16917	13019240	13019241	6.26083
5	210250	210251	.	1000	+	4.445987	4.837314	210250	210251	7.16917	210250	210251	6.26083
2	5804	5805	.	1000	+	4.031136	4.435091	5804	5805	4.18894	5804	5805	9.23605
5	4387523	4387524	.	1000	-	3.429324	3.856308	4387523	4387524	10.77910	4387523	4387524	2.63795
2	4052	4053	.	1000	+	4.303491	4.703420	4052	4053	5.19798	4052	4053	8.21430
2	5865	5866	.	1000	+	4.362704	4.759256	5865	5866	5.19798	5865	5866	8.21430
3	14198023	14198024	.	1000	+	4.345684	4.742971	14198023	14198024	5.19798	14198023	14198024	8.21430
3	14201567	14201568	.	1000	+	4.300224	4.698003	14201567	14201568	5.19798	14201567	14201568	8.21430
1	29736833	29736834	.	1000	+	4.439672	4.827071	29736833	29736834	6.68064	29736833	29736834	6.72396
3	14197834	14197835	.	1000	+	3.931302	4.344480	14197834	14197835	3.93292	14197834	14197835	9.46223
2	8737699	8737700	.	1000	+	4.429840	4.819107	8737699	8737700	6.43545	8737699	8737700	6.95462
3	14200107	14200108	.	1000	+	4.416178	4.808685	14200107	14200108	6.43545	14200107	14200108	6.95462
2	3861	3862	.	1000	+	4.324151	4.722974	3861	3862	4.94764	3861	3862	8.44196
2	6823	6824	.	1000	+	4.419587	4.812028	6823	6824	6.18958	6823	6824	7.18472
2	8643	8644	.	1000	+	4.457949	4.847751	8643	8644	6.18958	8643	8644	7.18472
3	14198536	14198537	.	1000	+	4.404987	4.797886	14198536	14198537	6.18958	14198536	14198537	7.18472
3	14202174	14202175	.	1000	+	4.429820	4.818690	14202174	14202175	6.18958	14202174	14202175	7.18472
2	4372	4373	.	1000	+	3.763400	4.180508	4372	4373	3.67498	4372	4373	9.68813
3	14198343	14198344	.	1000	+	3.743521	4.161356	14198343	14198344	3.67498	14198343	14198344	9.68813
3	14199856	14199857	.	1000	+	3.826354	4.245965	14199856	14199857	3.67498	14199856	14199857	9.68813
2	8557888	8557889	.	1000	-	4.080933	4.485863	8557888	8557889	9.10412	8557888	8557889	4.25402
5	9654253	9654254	.	1000	+	4.100535	4.508011	9654253	9654254	9.10412	9654253	9654254	4.25402
5	22383697	22383698	.	1000	-	4.085270	4.490431	22383697	22383698	9.10412	22383697	22383698	4.25402
5	24683700	24683701	.	1000	-	4.117160	4.520849	24683700	24683701	9.10412	24683700	24683701	4.25402
2	14522701	14522702	.	1000	-	4.170380	4.571728	14522701	14522702	8.86363	14522701	14522702	4.49447
3	17494872	17494873	.	1000	-	4.149347	4.549345	17494872	17494873	8.86363	17494872	17494873	4.49447
4	18163610	18163611	.	1000	-	4.170974	4.572630	18163610	18163611	8.86363	18163610	18163611	4.49447
4	18163623	18163624	.	1000	-	4.152185	4.551948	18163623	18163624	8.86363	18163623	18163624	4.49447
2	5235	5236	.	1000	+	4.394331	4.789682	5235	5236	5.94297	5235	5236	7.41431
3	14199206	14199207	.	1000	+	4.398350	4.794193	14199206	14199207	5.94297	14199206	14199207	7.41431
1	26191131	26191132	.	1000	+	4.213056	4.619917	26191131	26191132	8.62279	26191131	26191132	4.73349
1	13668945	13668946	.	1000	-	4.214315	4.621899	13668945	13668946	8.62279	13668945	13668946	4.73349
3	21069492	21069493	.	1000	-	4.206987	4.611769	21069492	21069493	8.62279	21069492	21069493	4.73349
5	20715620	20715621	.	1000	-	4.214147	4.621568	20715620	20715621	8.62279	20715620	20715621	4.73349
4	8242606	8242607	.	1000	-	4.053308	4.458596	8242606	8242607	9.34428	8242606	8242607	4.01193
5	6851584	6851585	.	1000	-	4.004970	4.412110	6851584	6851585	9.34428	6851584	6851585	4.01193
1	8268661	8268662	.	1000	-	4.245602	4.652301	8268661	8268662	8.38159	8268661	8268662	4.97122
2	13177108	13177109	.	1000	+	4.264034	4.665510	13177108	13177109	8.38159	13177108	13177109	4.97122
2	13019168	13019169	.	1000	-	4.256592	4.661337	13019168	13019169	8.38159	13019168	13019169	4.97122
1	16129622	16129623	.	1000	+	4.291256	4.689476	16129622	16129623	8.13999	16129622	16129623	5.20780
1	608016	608017	.	1000	-	4.284873	4.682436	608016	608017	8.13999	608016	608017	5.20780
1	7042654	7042655	.	1000	-	4.279259	4.675839	7042654	7042655	8.13999	7042654	7042655	5.20780
4	1229219	1229220	.	1000	-	4.281955	4.678953	1229219	1229220	8.13999	1229219	1229220	5.20780
4	7522549	7522550	.	1000	+	4.320089	4.719611	7522549	7522550	7.89798	7522549	7522550	5.44334
5	210251	210252	.	1000	+	4.337124	4.734232	210251	210252	7.89798	210251	210252	5.44334
1	6447164	6447165	.	1000	+	3.796224	4.213616	6447164	6447165	10.06290	6447164	6447165	3.27338
2	13177122	13177123	.	1000	+	4.362281	4.758474	13177122	13177123	7.65553	13177122	13177123	5.67794
3	22612718	22612719	.	1000	+	4.375946	4.772320	22612718	22612719	7.65553	22612718	22612719	5.67794
3	22975201	22975202	.	1000	+	4.343114	4.741054	22975201	22975202	7.65553	22975201	22975202	5.67794
Pt	133596	133597	.	1000	-	4.351209	4.749126	133596	133597	7.65553	133596	133597	5.67794
Pt	136897	136898	.	1000	-	3.617608	4.042496	136897	136898	3.41482	136897	136898	9.91376
Pt	105453	105454	.	1000	+	4.334545	4.731218	105453	105454	5.44725	105453	105454	7.87209
Pt	104766	104767	.	1000	+	4.409401	4.804092	104766	104767	7.16917	104766	104767	6.14463
2	3848	3849	.	1000	+	4.041163	4.446867	3848	3849	4.18894	3848	3849	9.12284
[truncated: 91,046 more rows]
