# Supplementary material for: Nanopore direct RNA sequencing maps the complexity of Arabidopsis mRNA processing and m6A modification
Source: eLife. 2020 Jan 14;9:e49658. doi: 10.7554/eLife.49658 (PMC6959997; doi:10.7554/eLife.49658)
Supplement: Figure 6—figure supplement 1—source data 2. [file elife-49658-fig6-figsupp1-data2.xlsx]

## Sheet: Sheet1
	gene	well	dye	content	bio_sample	efficiency	Ct	tech	cond	bio	is_housekeeping	is_control_cond
0	UBC	A1	SYB	Sample	Col-1	28.76%	21.07	0	Col	0	TRUE	TRUE
1	UBC	A2	SYB	Sample	Col-1	40.31%	20.86	1	Col	0	TRUE	TRUE
2	UBC	A3	SYB	Sample	Col-1	34.85%	21.26	2	Col	0	TRUE	TRUE
3	UBC	B1	SYB	Sample	Col-2	29.45%	21.66	0	Col	1	TRUE	TRUE
4	UBC	B2	SYB	Sample	Col-2	39.14%	21.74	1	Col	1	TRUE	TRUE
5	UBC	B3	SYB	Sample	Col-2	38.77%	21.86	2	Col	1	TRUE	TRUE
6	UBC	C1	SYB	Sample	Col-3	59.15%	22.13	0	Col	2	TRUE	TRUE
7	UBC	C2	SYB	Sample	Col-3	76.93%	22.46	1	Col	2	TRUE	TRUE
8	UBC	C3	SYB	Sample	Col-3	40.21%	21.66	2	Col	2	TRUE	TRUE
9	UBC	D1	SYB	Sample	vir1	55.57%	22.57	0	vir	0	TRUE	FALSE
10	UBC	D2	SYB	Sample	vir1	58.33%	22.42	1	vir	0	TRUE	FALSE
11	UBC	D3	SYB	Sample	vir1	59.28%	22.53	2	vir	0	TRUE	FALSE
12	UBC	E1	SYB	Sample	vir2	34.14%	21.11	0	vir	1	TRUE	FALSE
13	UBC	E2	SYB	Sample	vir2	58.85%	22.61	1	vir	1	TRUE	FALSE
14	UBC	E3	SYB	Sample	vir2	80.17%	22.28	2	vir	1	TRUE	FALSE
15	UBC	F1	SYB	Sample	vir3	23.79%	21.35	0	vir	2	TRUE	FALSE
16	UBC	F2	SYB	Sample	vir3	72.97%	22.91	1	vir	2	TRUE	FALSE
17	UBC	F3	SYB	Sample	vir3	98.87%	22.96	2	vir	2	TRUE	FALSE
18	UBC	B4	SYB	Sample	vircom1	88.90%	22.25	0	vircom	0	TRUE	FALSE
19	UBC	B5	SYB	Sample	vircom1	54.68%	21.92	1	vircom	0	TRUE	FALSE
20	UBC	B6	SYB	Sample	vircom1	15.94%	20.55	2	vircom	0	TRUE	FALSE
21	UBC	C4	SYB	Sample	vircom2	36.07%	21.95	0	vircom	1	TRUE	FALSE
22	UBC	C5	SYB	Sample	vircom2	57.53%	21.93	1	vircom	1	TRUE	FALSE
23	UBC	C6	SYB	Sample	vircom2	38.32%	21.99	2	vircom	1	TRUE	FALSE
24	UBC	D4	SYB	Sample	vircom3	31.30%	21.92	0	vircom	2	TRUE	FALSE
25	UBC	D5	SYB	Sample	vircom3	33.13%	21.65	1	vircom	2	TRUE	FALSE
26	UBC	D6	SYB	Sample	vircom3	69.83%	22.24	2	vircom	2	TRUE	FALSE
45	FLC	A1	SYB	Sample	Col-1	59.57%	23.6	0	Col	0	FALSE	TRUE
46	FLC	A2	SYB	Sample	Col-1	32.09%	22.87	1	Col	0	FALSE	TRUE
47	FLC	A3	SYB	Sample	Col-1	61.62%	23.57	2	Col	0	FALSE	TRUE
48	FLC	B1	SYB	Sample	Col-2	46.38%	24.18	0	Col	1	FALSE	TRUE
49	FLC	B2	SYB	Sample	Col-2	50.57%	24.2	1	Col	1	FALSE	TRUE
50	FLC	B3	SYB	Sample	Col-2	47.85%	24.2	2	Col	1	FALSE	TRUE
51	FLC	C1	SYB	Sample	Col-3	35.88%	23.61	0	Col	2	FALSE	TRUE
52	FLC	C2	SYB	Sample	Col-3	76.69%	24.78	1	Col	2	FALSE	TRUE
53	FLC	C3	SYB	Sample	Col-3	41.60%	24.53	2	Col	2	FALSE	TRUE
54	FLC	D1	SYB	Sample	vir1	35.86%	30.38	0	vir	0	FALSE	FALSE
55	FLC	D2	SYB	Sample	vir1	77.07%	31.42	1	vir	0	FALSE	FALSE
56	FLC	D3	SYB	Sample	vir1	19.82%	30.75	2	vir	0	FALSE	FALSE
57	FLC	E1	SYB	Sample	vir2	19.40%	30.21	0	vir	1	FALSE	FALSE
58	FLC	E2	SYB	Sample	vir2	66.74%	30.27	1	vir	1	FALSE	FALSE
59	FLC	E3	SYB	Sample	vir2	51.96%	30.11	2	vir	1	FALSE	FALSE
60	FLC	F1	SYB	Sample	vir3	79.73%	29.84	0	vir	2	FALSE	FALSE
61	FLC	F2	SYB	Sample	vir3	64.65%	30.56	1	vir	2	FALSE	FALSE
62	FLC	F3	SYB	Sample	vir3	46.75%	30.7	2	vir	2	FALSE	FALSE
63	FLC	B4	SYB	Sample	vircom1	76.51%	24.26	0	vircom	0	FALSE	FALSE
64	FLC	B5	SYB	Sample	vircom1	98.23%	24.53	1	vircom	0	FALSE	FALSE
65	FLC	B6	SYB	Sample	vircom1	53.24%	24.04	2	vircom	0	FALSE	FALSE
66	FLC	C4	SYB	Sample	vircom2	53.14%	23.09	0	vircom	1	FALSE	FALSE
67	FLC	C5	SYB	Sample	vircom2	82.96%	23.55	1	vircom	1	FALSE	FALSE
68	FLC	C6	SYB	Sample	vircom2	63.17%	23.49	2	vircom	1	FALSE	FALSE
69	FLC	D4	SYB	Sample	vircom3	70.35%	24.09	0	vircom	2	FALSE	FALSE
70	FLC	D5	SYB	Sample	vircom3	78.77%	24.07	1	vircom	2	FALSE	FALSE
71	FLC	D6	SYB	Sample	vircom3	76.19%	23.7	2	vircom	2	FALSE	FALSE
90	CCA1	A1	SYB	Sample	Col-1	44.83%	23.42	0	Col	0	FALSE	TRUE
91	CCA1	A2	SYB	Sample	Col-1	38.36%	22.48	1	Col	0	FALSE	TRUE
92	CCA1	A3	SYB	Sample	Col-1	75.65%	22.64	2	Col	0	FALSE	TRUE
93	CCA1	B1	SYB	Sample	Col-2	51.14%	24.08	0	Col	1	FALSE	TRUE
94	CCA1	B2	SYB	Sample	Col-2	51.76%	23.3	1	Col	1	FALSE	TRUE
95	CCA1	B3	SYB	Sample	Col-2	68.07%	23.54	2	Col	1	FALSE	TRUE
96	CCA1	C1	SYB	Sample	Col-3	52.27%	23.37	0	Col	2	FALSE	TRUE
97	CCA1	C2	SYB	Sample	Col-3	65.03%	24.24	1	Col	2	FALSE	TRUE
98	CCA1	C3	SYB	Sample	Col-3	38.87%	23.33	2	Col	2	FALSE	TRUE
99	CCA1	D1	SYB	Sample	vir1	55.09%	24.05	0	vir	0	FALSE	FALSE
100	CCA1	D2	SYB	Sample	vir1	48.58%	23.6	1	vir	0	FALSE	FALSE
101	CCA1	D3	SYB	Sample	vir1	65.26%	23.83	2	vir	0	FALSE	FALSE
102	CCA1	E1	SYB	Sample	vir2	57.36%	23.22	0	vir	1	FALSE	FALSE
103	CCA1	E2	SYB	Sample	vir2	52.94%	22.86	1	vir	1	FALSE	FALSE
104	CCA1	E3	SYB	Sample	vir2	63.49%	23.44	2	vir	1	FALSE	FALSE
105	CCA1	F1	SYB	Sample	vir3	27.29%	22.95	0	vir	2	FALSE	FALSE
106	CCA1	F2	SYB	Sample	vir3	57.83%	23.34	1	vir	2	FALSE	FALSE
107	CCA1	F3	SYB	Sample	vir3	72.80%	23.59	2	vir	2	FALSE	FALSE
108	CCA1	B4	SYB	Sample	vircom1	73.97%	24.43	0	vircom	0	FALSE	FALSE
109	CCA1	B5	SYB	Sample	vircom1	49.63%	23.94	1	vircom	0	FALSE	FALSE
110	CCA1	B6	SYB	Sample	vircom1	71.02%	24.44	2	vircom	0	FALSE	FALSE
111	CCA1	C4	SYB	Sample	vircom2	74.00%	24.02	0	vircom	1	FALSE	FALSE
112	CCA1	C5	SYB	Sample	vircom2	49.75%	23.02	1	vircom	1	FALSE	FALSE
113	CCA1	C6	SYB	Sample	vircom2	69.44%	23.49	2	vircom	1	FALSE	FALSE
114	CCA1	D4	SYB	Sample	vircom3	73.97%	24.16	0	vircom	2	FALSE	FALSE
115	CCA1	D5	SYB	Sample	vircom3	54.13%	23.86	1	vircom	2	FALSE	FALSE
116	CCA1	D6	SYB	Sample	vircom3	54.52%	23.96	2	vircom	2	FALSE	FALSE
