# Supplementary material for: Nanopore direct RNA sequencing maps the complexity of Arabidopsis mRNA processing and m6A modification
Source: eLife. 2020 Jan 14;9:e49658. doi: 10.7554/eLife.49658 (PMC6959997; doi:10.7554/eLife.49658)
Supplement: Figure 6—source data 2. [file elife-49658-fig6-data2.xlsx]

## Sheet: experiment_1
hours	WT_0	WT_1	WT_2	WT_3	WT_4	WT_5	WT_6	WT_7	WT_8	WT_9	WT_10	WT_11	WT_12	WT_13	WT_14	WT_15	WT_16	WT_17	WT_18	WT_19	WT_20	WT_21	WT_22	WT_23	WT_24	WT_25	WT_26	WT_27	WT_28	WT_29	WT_30	WT_31	WT_32	WT_33	WT_34	WT_35	WT_36	WT_37	WT_38	WT_39	WT_40	WT_41	WT_42	WT_43	WT_44	WT_45	WT_46	WT_47	WT_48
8	0.991507	1.10363	1.08415	1.09471	1.06938	1.03028	1.03747	0.962419	0.979376	1.06455	0.964883	0.983956	0.985034	0.979698	0.999411	0.970931	0.970257	0.976119	0.990906	0.977078	0.975373	0.977396	0.991382	0.983795	0.987379	0.989118	0.981946	0.980849	0.993369	0.989246	1.01583	0.990038	0.955069	0.93717	1.117	0.985622	0.989379	0.990208	0.968238	0.984695	0.995261	0.977205	0.985369	0.981787	0.974238	0.984081	0.983334	0.983272	0.998825
9	1.00433	1.11006	1.08613	1.09098	1.07175	1.03914	1.04062	0.970849	0.99013	1.08025	0.983679	1.00049	0.999652	0.987981	1.00582	0.980524	0.980448	0.983049	0.998616	0.986026	0.98868	0.989326	0.993894	0.993653	0.993595	0.995168	0.991928	0.990736	1.00171	1.00661	1.03186	1.00909	0.972222	0.962885	1.13634	0.994968	1.00029	1.00435	0.985498	1.00211	1.00909	0.984653	0.993194	0.994145	0.983989	0.998182	0.996551	0.991511	1.00311
10	1.01906	1.10561	1.07822	1.0836	1.0688	1.0466	1.04336	0.981614	1.00508	1.0971	0.996466	1.02266	1.01612	1.00185	1.00807	0.987038	0.989984	0.989758	1.00394	0.990606	1.00047	0.999939	0.995833	0.999013	1.0019	1.00397	0.997843	1.00176	1.00692	1.02087	1.04919	1.01702	0.990493	0.976739	1.14034	1.00211	1.01547	1.01193	0.996797	1.01775	1.02184	0.991034	0.999048	1.00395	0.991255	1.01058	1.00451	0.998182	1.00479
11	1.01579	1.09356	1.06431	1.06982	1.05818	1.04015	1.03623	0.983942	1.00242	1.08073	0.987512	1.01872	1.00749	1.00405	1.0099	0.992214	0.991652	0.987411	1.0064	0.99248	0.996351	0.998241	0.997811	1.00304	1.00572	1.00442	1.00241	1.004	1.01038	1.02414	1.04684	1.0197	0.98755	0.979216	1.12921	1.00621	1.01235	1.01383	1.00526	1.01778	1.02352	0.992776	1.00311	1.00702	0.993075	1.0145	1.00866	1.00203	1.00438
12	1.0133	1.07843	1.04756	1.05871	1.04796	1.03497	1.02982	0.985236	0.999165	1.07562	0.990999	1.01997	1.01201	1.00578	1.01186	0.992041	0.99283	0.990539	1.00436	0.994346	0.993118	0.998424	1.00029	0.997314	1.00569	0.998052	0.999514	1.00058	1.00639	1.01967	1.04643	1.01605	0.986817	0.981924	1.11553	1.00853	1.01747	1.01324	1.00364	1.01953	1.02123	0.991625	1.00155	1.00533	0.996658	1.01826	1.00637	1.00373	1.00459
13	1.0069	1.06002	1.03692	1.04762	1.04061	1.02928	1.027	0.9884	0.988677	1.05815	0.983592	1.02012	1.00621	0.997225	1.00836	0.990941	0.991597	0.988493	1.00058	0.994652	0.991433	0.992384	0.997371	0.996102	1.00268	0.994581	0.999777	1.0014	1.00566	1.01703	1.03489	1.00805	0.983434	0.974758	1.09295	1.00691	1.01548	1.00989	1.00462	1.01352	1.01493	0.990849	1.00387	0.997535	0.995206	1.01091	1.00251	1.00534	1.00371
14	1.00437	1.04746	1.02392	1.0353	1.03195	1.02093	1.02057	0.987594	0.982703	1.04885	0.975838	1.01145	1.00039	0.994339	1.01054	0.987511	0.988771	0.98857	0.99831	0.997206	0.989865	0.993259	0.999312	0.994044	1.00374	0.991475	0.993291	0.996388	1.00245	1.0105	1.02455	0.995755	0.977553	0.969134	1.07293	1.00396	1.00531	1.01033	1.0021	1.00779	1.00904	0.989358	1.00459	0.993632	0.990388	1.00873	1.00369	1.00255	1.00359
15	0.999762	1.03679	1.01712	1.02855	1.02927	1.01709	1.01537	0.985879	0.984991	1.0404	0.982048	1.01489	1.00226	0.995966	1.00917	0.988051	0.993304	0.989017	0.99809	0.994428	0.990769	0.991028	0.99948	0.994207	1.00205	0.991595	0.994153	0.996689	0.99935	1.00678	1.02419	0.995889	0.981814	0.968382	1.05951	1.00238	1.00832	1.00814	1.00296	1.00261	1.00514	0.987	1.00269	0.993478	0.991381	1.00853	1.00163	1.00264	1.00274
16	0.999735	1.02767	1.01259	1.02041	1.02495	1.01621	1.01261	0.987792	0.986324	1.03638	0.986103	1.01378	1.00043	0.991915	1.00902	0.988047	0.993171	0.988722	0.998276	0.996188	0.988735	0.990019	0.999668	0.992234	1.00251	0.989821	0.992475	0.993986	0.9991	1.00625	1.02241	0.99268	0.979765	0.971006	1.04932	1.00193	1.00474	1.00623	0.998227	1.00233	0.999122	0.986501	1.0009	0.991248	0.992005	1.00704	0.998308	0.998792	1.00431
17	0.997129	1.01813	1.00631	1.01175	1.01525	1.00877	1.00582	0.983641	0.982391	1.02931	0.980792	1.00931	0.994683	0.985123	1.00416	0.984116	0.987915	0.983595	0.9961	0.990974	0.985884	0.985374	0.999014	0.990428	0.997755	0.98905	0.990523	0.991179	0.999799	1.00375	1.0138	0.986754	0.97134	0.968448	1.03647	0.999325	0.999231	1.00528	0.999182	0.998289	0.995248	0.984557	0.999611	0.99316	0.990304	1.00174	0.999601	0.997228	1.00202
18	0.996831	1.01537	1.00562	1.00917	1.0135	1.00572	1.00381	0.980842	0.982074	1.02717	0.983443	1.00716	0.997066	0.986901	1.00697	0.987886	0.990733	0.981958	0.993504	0.990079	0.989508	0.986531	0.99721	0.99279	0.997835	0.989583	0.989798	0.995802	0.999878	1.0038	1.01299	0.988535	0.973044	0.965548	1.02996	1.00009	0.996327	1.00174	0.99451	0.996563	0.994049	0.982293	1.00012	0.988691	0.992428	1.00126	0.994902	0.997856	1.00096
19	0.994857	1.00827	1.00101	1.00368	1.00618	1.00436	0.999609	0.979714	0.983845	1.02044	0.983966	1.00383	0.997231	0.98697	1.0045	0.986935	0.994335	0.982196	0.994985	0.99037	0.988414	0.987535	0.998499	0.990943	0.997439	0.989674	0.991249	0.991736	0.998267	0.999126	1.00911	0.988779	0.976059	0.966532	1.0204	0.996028	0.98937	1.0003	0.994369	0.997168	0.990998	0.983148	0.999906	0.987194	0.991803	1.00074	0.993866	0.995571	1.00156
20	0.993571	1.00359	0.996214	0.996491	1.0032	1.00021	0.998571	0.980951	0.986345	1.01776	0.986453	1.00374	0.994369	0.989065	1.00165	0.987896	0.990293	0.981409	0.994642	0.992799	0.988241	0.988594	0.996989	0.992475	0.998711	0.990542	0.993246	0.99415	1.00138	0.9998	1.0094	0.988247	0.97512	0.968652	1.01608	0.993378	0.991092	0.997068	0.992872	0.99569	0.99066	0.983513	0.997202	0.986074	0.99346	0.997053	0.99635	0.998569	1.00113
21	0.992206	0.999747	0.992005	0.995407	1.00037	0.998592	0.996396	0.982304	0.99468	1.01409	0.992734	1.0045	0.999646	0.988732	1.00322	0.992722	0.993513	0.986118	0.997577	0.992745	0.991406	0.991467	0.997177	0.990776	0.997794	0.992289	0.991175	0.989907	1.00059	1.00005	1.01062	0.98765	0.976202	0.970647	1.01402	0.997723	0.991808	0.997767	0.993197	0.995047	0.987881	0.98494	0.995785	0.989986	0.995059	0.996219	0.995103	0.996429	1.00326
22	0.992111	0.995187	0.989467	0.990417	0.996587	0.995275	0.990581	0.981009	0.992029	1.01125	0.992079	1.00142	0.996028	0.985128	1.00338	0.990667	0.990732	0.986497	0.994081	0.988958	0.989102	0.988872	0.997379	0.992037	0.996076	0.99156	0.991755	0.99037	0.999362	1.00298	1.00667	0.985185	0.971995	0.967263	1.00921	0.992028	0.987136	0.994797	0.989314	0.991849	0.98706	0.982141	0.997122	0.98533	0.994261	0.996147	0.992204	0.99517	0.999787
23	0.987171	0.994771	0.989973	0.987677	0.992903	0.993013	0.989342	0.980678	0.99445	1.00614	0.990417	1.00091	0.992896	0.988067	1.00368	0.989071	0.986012	0.984606	0.993405	0.992049	0.988023	0.987662	0.996302	0.991774	0.995437	0.989648	0.992511	0.988963	0.996435	0.998478	1.00751	0.986417	0.97716	0.968567	1.00168	0.993964	0.988154	0.994375	0.990342	0.98921	0.985337	0.984951	0.995103	0.987071	0.991501	0.994399	0.991616	0.992164	0.998566
24	0.985797	0.988737	0.984076	0.981613	0.988872	0.991076	0.985534	0.979388	0.996924	1.00035	0.991982	1.00065	0.996068	0.986967	1.00139	0.98655	0.999743	0.98663	0.99468	0.98813	0.987708	0.989883	0.996725	0.98944	0.995779	0.990569	0.987931	0.985605	0.994599	0.99205	1.00216	0.98153	0.973568	0.962204	0.997801	0.990861	0.987846	0.993522	0.986724	0.988757	0.98483	0.983963	0.995648	0.987211	0.988466	0.991741	0.987329	0.992414	1.00028
25	0.984237	0.98413	0.983563	0.979546	0.985603	0.989621	0.984947	0.977494	0.998497	0.996325	0.99026	0.998319	0.993704	0.985467	1.00142	0.987908	0.986383	0.985167	0.992287	0.989468	0.987668	0.989331	0.997179	0.990978	0.995291	0.99043	0.991312	0.984528	0.994594	0.992454	1.00063	0.976159	0.975893	0.960105	0.993739	0.992179	0.98623	0.993502	0.985136	0.989317	0.986244	0.985064	0.99446	0.984158	0.985526	0.989662	0.985882	0.9914	0.996831
26	0.983143	0.982611	0.980489	0.979259	0.984334	0.989511	0.984235	0.9786	0.993244	0.991557	0.989028	0.993138	0.992156	0.982731	1.00012	0.991353	0.98568	0.983934	0.992425	0.991429	0.985112	0.987746	0.997696	0.991826	0.994467	0.989423	0.990349	0.985538	0.996574	0.989781	0.996577	0.97327	0.97099	0.961664	0.991657	0.994501	0.987261	0.991156	0.984343	0.990063	0.986071	0.989139	0.996441	0.984906	0.987627	0.988356	0.982853	0.993151	0.996392
27	0.983063	0.983048	0.98063	0.979363	0.979842	0.989534	0.984558	0.979675	1.00068	0.990628	0.994797	0.99803	0.999439	0.986098	1.00059	0.992881	0.985836	0.988523	0.992598	0.994114	0.987011	0.991847	0.996703	0.989505	0.994569	0.99244	0.989491	0.986189	0.993391	0.988149	1.00247	0.97185	0.969155	0.96205	0.994772	0.987359	0.993361	0.990044	0.989494	0.990716	0.989259	0.993288	0.994677	0.981676	0.986472	0.987427	0.984696	0.992524	0.99772
28	0.984351	0.982724	0.98255	0.978838	0.982574	0.989508	0.983288	0.97977	0.995196	0.984932	0.98911	0.996843	0.992885	0.984969	0.999264	0.993454	0.986824	0.987778	0.99105	0.989755	0.985375	0.991231	0.998818	0.991138	0.996612	0.991039	0.989593	0.987633	0.996323	0.986463	1.00402	0.975526	0.971012	0.958121	0.995597	0.992403	0.990599	0.993316	0.989932	0.989567	0.993343	0.995895	0.993728	0.980717	0.988189	0.987262	0.983639	0.992048	0.994418
29	0.986914	0.983311	0.982814	0.981106	0.985004	0.992626	0.989526	0.987565	0.996401	0.987602	0.995632	0.998497	0.998582	0.985827	0.998	0.997233	0.992767	0.98961	0.995082	0.993153	0.990269	0.994147	0.999471	0.993958	0.995657	0.991431	0.989429	0.986921	0.995311	0.988838	1.00721	0.97628	0.978109	0.967827	0.998031	0.993256	0.997424	0.998517	0.993973	0.994522	0.993759	0.994099	0.992935	0.985808	0.990622	0.99209	0.986723	0.99265	0.994591
30	0.987498	0.984148	0.988921	0.987151	0.986056	0.996397	0.991108	0.991399	1.00384	0.990913	1.00705	1.01116	1.00625	0.99483	0.999688	0.999932	0.994974	0.994714	0.99889	0.99372	0.993822	0.999693	0.998971	0.996122	0.997467	0.992634	0.995319	0.989536	0.996801	0.98729	1.014	0.979548	0.98619	0.972445	0.999127	0.99515	1.00005	0.999569	0.999638	0.996664	1.00052	0.999714	0.994327	0.991964	0.993297	0.994704	0.99073	0.99069	0.995407
31	0.99316	0.989563	0.989345	0.993072	0.989616	0.999515	0.995181	0.995234	0.999996	0.995444	1.0111	1.01521	1.00524	0.999687	0.998969	1.00509	0.998722	0.9969	0.998924	0.995705	0.998414	1.00103	0.999376	0.998691	0.997145	0.99624	0.997109	0.997588	0.999386	0.988479	1.01506	0.985956	0.991424	0.9779	1.0037	0.996493	1.00074	1.00527	1.00045	0.998581	1.00393	1.00361	0.995624	0.994865	0.998559	0.998106	0.991091	0.992359	0.99437
32	1	0.990803	0.995122	0.997954	0.994011	1.0035	0.997493	0.996542	1.00917	1.00029	1.02701	1.02359	1.01429	1.01065	0.998753	1.0081	1.00605	1.00133	1.00332	0.995905	1.00314	1.00243	0.998901	0.997077	0.999876	0.997496	0.999193	1.0013	1.00048	0.992059	1.01789	0.995376	1.00228	0.990231	0.99964	0.998632	1.0068	1.00838	1.0016	1.00488	1.00786	1.00722	0.999993	1.00038	0.998719	0.999584	0.995903	0.994031	0.99477
33	1.01107	0.998402	1.00138	1.00225	0.996494	1.00904	1.00369	1.01025	1.01468	1.00802	1.03558	1.03492	1.02587	1.01712	1.00175	1.01358	1.01039	1.00753	1.00681	1.00603	1.01196	1.00825	1.00124	1.00721	1.00217	1.00459	1.0048	1.00654	1.00615	1.00488	1.02865	1.01174	1.01578	1.00616	1.00542	1.00337	1.01293	1.01778	1.01263	1.01491	1.01515	1.00898	1.00248	1.00521	1.01	1.01132	1.00008	0.999697	0.995643
34	1.01997	1.00354	1.00562	1.00396	1.0014	1.0197	1.0062	1.0156	1.02127	1.01378	1.04257	1.04243	1.02934	1.02414	1.00094	1.01812	1.0147	1.01052	1.01219	1.00606	1.01875	1.0115	1.003	1.00876	0.996233	1.00629	1.01164	1.01211	1.01231	1.0123	1.03763	1.02012	1.02859	1.01824	1.00905	1.00674	1.01702	1.02099	1.01806	1.02103	1.02006	1.01576	1.00789	1.01211	1.01158	1.00941	1.00868	0.999385	0.997571
35	1.02534	1.00712	1.00577	1.00902	1.00381	1.01759	1.0085	1.01807	1.02189	1.01976	1.0524	1.04717	1.03729	1.02189	1.00248	1.02452	1.0196	1.01435	1.01711	1.01062	1.02471	1.01328	1.00715	1.01221	0.999192	1.01253	1.01621	1.01359	1.01461	1.01609	1.04291	1.02399	1.03068	1.02665	1.01022	1.0109	1.0253	1.02771	1.02286	1.0266	1.0237	1.01305	1.01226	1.01749	1.01433	1.01759	1.01253	1.01244	1.00056
36	1.02834	1.00661	0.998042	1.00015	0.999597	1.01686	1.00661	1.02107	1.01689	1.01739	1.04948	1.04338	1.03373	1.0212	1.0028	1.02111	1.01602	1.01148	1.01717	1.0134	1.0241	1.01292	1.00605	1.00978	1.00873	1.01444	1.01724	1.01595	1.01623	1.01769	1.04163	1.02842	1.03299	1.02775	1.00515	1.01139	1.02615	1.02084	1.02605	1.02765	1.02683	1.0137	1.01082	1.01836	1.01958	1.02081	1.0165	1.01033	0.998358
37	1.02684	1.00271	0.989472	0.994934	0.997416	1.01214	1.0032	1.01829	1.01925	1.01269	1.04591	1.03637	1.03594	1.01986	1.00349	1.01862	1.01239	1.01181	1.01183	1.01341	1.0173	1.01066	1.00629	1.01234	1.00695	1.01368	1.01477	1.01062	1.01578	1.01118	1.03783	1.02346	1.02784	1.02697	1.00043	1.01064	1.02799	1.01567	1.01875	1.02026	1.02252	1.01434	1.01004	1.0174	1.0163	1.0166	1.01517	1.01383	1.00121
38	1.02304	0.994392	0.985064	0.990175	0.992396	1.00445	0.999334	1.02178	1.01381	1.00564	1.04266	1.03333	1.03279	1.01657	1.00346	1.01289	1.01148	1.01024	1.01183	1.00989	1.01119	1.00712	1.00495	1.01107	1.0076	1.01115	1.01238	1.00705	1.01104	1.00652	1.02954	1.01181	1.01886	1.02	0.990627	1.00885	1.02156	1.01501	1.017	1.01561	1.01899	1.01065	1.0087	1.01492	1.01302	1.01441	1.01178	1.00755	1.00181
39	1.01836	0.991693	0.980865	0.98849	0.994253	1.00126	0.998903	1.01601	1.0113	1.00109	1.03851	1.02377	1.0238	1.00745	1.00329	1.0136	1.01186	1.0088	1.00877	1.01278	1.00625	1.00611	1.0044	1.00911	1.00688	1.01236	1.0098	1.00459	1.00702	1.00113	1.02429	1.00697	1.01517	1.01819	0.987168	1.0064	1.021	1.00982	1.01235	1.0098	1.01517	1.00811	1.01068	1.01215	1.01207	1.01089	1.01028	1.00812	0.999838
40	1.0158	0.987304	0.980177	0.985917	0.989092	0.995943	0.996919	1.01786	1.00668	0.997372	1.03226	1.02212	1.01855	1.00412	1.00318	1.01122	1.00908	1.006	1.00771	1.01003	1.0062	1.00271	1.00422	1.00981	1.00431	1.00734	1.00681	1.00334	1.00404	0.999944	1.01877	1.0031	1.00924	1.0101	0.978649	1.00817	1.01632	1.00742	1.0061	1.00968	1.01322	1.00811	1.00544	1.01231	1.01004	1.0081	1.00908	1.00799	0.998181
41	1.01572	0.982898	0.981359	0.987201	0.988165	0.995844	0.994266	1.01694	1.00762	0.991305	1.03436	1.01774	1.01877	1.00727	1.00144	1.01091	1.00926	1.0067	1.00593	1.00992	1.00648	1.00273	1.00506	1.00877	1.00679	1.00836	1.00799	1.00328	1.00293	0.998545	1.01599	1.0014	1.01084	1.01227	0.976896	1.0051	1.0143	1.00918	1.00585	1.01006	1.01313	1.00888	1.00872	1.01283	1.0058	1.00398	1.00588	1.00607	1.0008
42	1.00997	0.983343	0.977962	0.983375	0.986099	0.991374	0.991215	1.01492	1.00914	0.991193	1.02887	1.00778	1.0142	1.00102	1.00138	1.00909	1.00773	1.00442	1.00237	1.00583	1.00217	1.00264	1.00252	1.00645	1.00394	1.00744	1.00517	1.00064	1.00141	0.996527	1.00975	1.00241	1.01014	1.00789	0.971816	1.00353	1.01098	1.00623	1.00282	1.00594	1.00937	1.00696	1.00349	1.00716	1.0075	1.00378	1.00582	1.00734	0.998296
43	1.00858	0.977938	0.974769	0.9822	0.983875	0.990423	0.992397	1.01158	1.01441	0.985672	1.02571	1.00539	1.00924	1.0027	0.999497	1.0059	1.00337	1.00114	1.00061	1.00453	1.00079	1.00098	1.00192	0.999821	1.00271	1.00583	1.00423	0.999199	0.999109	0.991958	1.00362	0.995999	1.00464	1.00427	0.965507	1.00404	1.00624	0.999672	1.00248	1.00602	1.0047	1.00018	1.00254	1.00598	1.00425	1.00446	1.00409	0.999518	0.998308
44	1.00711	0.974947	0.974457	0.978927	0.985051	0.989393	0.989304	1.01251	1.01478	0.982335	1.0251	1.00484	1.00861	0.998707	1.00033	1.00506	1.00311	1.00355	0.999357	1.00119	1.00055	0.999013	0.998501	1.00164	1.00281	1.00373	1.00516	1.0003	1.00003	0.994465	0.996439	0.996351	1.00547	1.00453	0.966409	1.0015	1.00506	1.00127	0.999513	1.00212	1.00492	1.00562	1.00006	1.00246	1.0061	1.00317	1.00371	0.998406	0.997973
45	1.00939	0.975403	0.974155	0.979452	0.982815	0.986374	0.987663	1.01052	1.01637	0.982085	1.02213	0.996631	1.00934	1.00538	0.998146	1.00581	1.00105	1.00308	1.00054	1.00382	1.0029	0.998847	0.999088	1.00652	1.00524	1.00247	1.00296	0.995344	1.00063	0.996511	0.99654	0.998988	1.00689	1.0063	0.965234	0.998762	1.00278	0.999591	0.999771	1.00251	1.00158	1.00494	1.00541	1.00385	1.00482	1.00127	1.00296	0.999042	0.998711
46	1.00266	0.969564	0.975171	0.976042	0.97926	0.983011	0.98391	1.00877	1.01526	0.976795	1.01519	0.996204	1.00201	1.00183	0.998694	1.00178	1.0002	0.999948	0.997242	0.99803	1.00101	0.997637	0.999372	1.00416	1.00224	1.00161	1.00209	0.995332	0.998191	0.992331	0.99382	0.992699	1.00032	1.00134	0.964951	0.997498	1.00006	0.995376	0.999764	0.999746	0.997557	0.999789	1.00415	1.00106	1.00258	1.00194	1.00448	0.99791	0.996895
47	0.999066	0.967041	0.974284	0.973653	0.977199	0.978094	0.984271	1.00971	1.0164	0.973161	1.01302	0.988337	1.00167	1.00508	0.995408	1.00068	0.998719	0.996822	0.998235	0.99627	0.999254	0.996069	0.996561	1.00519	1.00223	0.999012	1.00051	0.992158	0.996523	0.990213	0.98824	0.995201	0.995678	1.00322	0.963378	0.992254	0.997297	0.991108	0.996013	0.99591	0.99594	1.00444	0.997367	0.999599	1.00178	0.996694	1.00131	0.998185	0.997604
48	0.998103	0.963543	0.973694	0.971841	0.980719	0.978475	0.983386	1.00982	1.01153	0.966924	1.01103	0.988648	0.997928	1.00433	0.995386	0.997893	0.998792	0.997282	0.996838	0.997465	1.0008	0.997835	0.999011	1.00471	1.00161	0.999398	1.00057	0.99511	0.99343	0.988676	0.988168	0.993919	0.995456	1.00498	0.96207	0.992856	0.996837	0.990939	0.99539	0.996661	0.99369	1.00269	0.998407	1.0029	1.00192	0.991385	1.00158	0.995824	0.99606
49	0.99513	0.963074	0.973096	0.972686	0.974931	0.975056	0.982401	1.00697	1.00759	0.964481	1.00656	0.984061	0.993604	1.00218	0.995213	0.997756	0.995879	0.994751	0.9956	0.99388	0.995277	0.993649	0.999167	1.00105	0.999677	0.996673	0.996664	0.99012	0.993931	0.985954	0.985055	0.990973	0.991113	0.999667	0.958119	0.995824	0.994566	0.991116	0.990014	0.992704	0.99354	1.00497	0.995789	0.99796	0.997669	0.992856	0.996894	0.993292	0.995233
50	0.991089	0.961682	0.972776	0.971634	0.973423	0.972917	0.978477	1.00591	0.999122	0.962368	1.00029	0.981448	0.987851	0.99267	0.993926	0.991673	0.994329	0.993573	0.991932	0.996703	0.994616	0.991677	0.996794	1.00147	0.997082	0.994737	0.995898	0.988156	0.991165	0.984637	0.980069	0.984835	0.981855	0.9951	0.956564	0.987108	0.989027	0.984907	0.990354	0.989215	0.988306	1.00191	0.995278	0.996442	0.997256	0.988417	0.991377	0.989759	0.995567
51	0.994736	0.958864	0.975216	0.974225	0.976644	0.973678	0.984236	1.00739	0.99604	0.961742	1.00127	0.982288	0.987468	0.998304	0.991413	0.99701	0.995306	0.998168	0.993459	1.00062	0.994244	0.993769	0.996597	0.999716	0.996265	0.993713	0.993436	0.988637	0.991099	0.982042	0.982041	0.985091	0.983246	1.00146	0.957544	0.989603	0.991881	0.987917	0.989744	0.989147	0.990391	0.998773	0.994219	1.00064	0.997223	0.986682	0.991354	0.991843	0.992728
52	0.994149	0.959353	0.978646	0.978897	0.977922	0.977855	0.986019	1.00693	0.99405	0.963016	1.0031	0.983861	0.987455	0.998278	0.992057	0.998793	0.998995	0.998237	0.996648	0.997628	0.996057	0.997029	0.995982	0.999706	0.997698	0.994939	0.994067	0.990888	0.990218	0.983823	0.98126	0.991054	0.986825	0.997525	0.957732	0.98941	0.991216	0.991515	0.990573	0.989932	0.988859	1.00221	0.995644	0.996659	0.997755	0.99174	0.992836	0.989585	0.996441
53	0.994161	0.961739	0.981439	0.982149	0.981087	0.980664	0.986826	1.00494	0.994312	0.964732	1.00258	0.985564	0.992032	0.996856	0.992093	0.998698	0.997258	1.00182	0.996992	0.997383	0.996209	0.996563	0.999796	1.00006	0.997292	0.994809	0.992881	0.993515	0.990881	0.98504	0.979873	0.985797	0.984553	0.996901	0.960568	0.989427	0.990576	0.991747	0.990232	0.989249	0.996062	1.00441	0.993716	0.995451	0.999354	0.988982	0.993728	0.991715	0.996173
54	0.998783	0.969262	0.989669	0.987337	0.985193	0.984262	0.991916	1.0037	0.994791	0.970196	1.00448	0.990029	0.994944	0.997745	0.993908	1.00197	0.999628	1.00735	0.99559	0.997684	1.00086	0.999088	0.999308	0.999039	0.998475	0.995199	0.995003	0.999333	0.992028	0.990681	0.979896	0.99511	0.991166	1.00396	0.965805	0.987778	0.992895	0.991637	0.994886	0.992215	0.996469	1.004	0.992494	0.996284	1.00386	0.99174	0.996313	0.993664	0.997238
55	1.00459	0.973396	0.995274	0.988485	0.990257	0.988423	0.994723	1.00353	0.997322	0.976578	1.0071	0.991692	1.00032	1.00695	0.993632	1.00527	1.00467	1.01067	1.00244	0.995538	1.00583	1.0018	1.00037	1.00005	0.998352	0.998145	0.999601	1.00235	0.995702	0.999186	0.983922	1.00794	1.00525	1.01462	0.968842	0.992808	0.995799	1.00215	0.99851	0.998198	0.997962	1.00524	0.99424	0.998424	1.00721	0.996201	0.997917	0.99721	1.00005
56	1.00775	0.977156	1.00284	0.993335	0.995078	0.991555	0.999852	1.00733	1.00248	0.980442	1.01379	0.992715	1.00347	1.00983	0.994136	1.0092	1.00734	1.01511	1.00476	1.00063	1.00854	1.00539	1.00192	1.00221	0.998184	1.00433	1.00264	1.00811	0.997342	1.00646	0.985427	1.01401	1.01441	1.01588	0.972767	0.995656	1.00112	1.00322	1.00308	0.999991	1.00206	1.00895	0.998706	1.00111	1.00873	0.999656	1.00477	0.99845	0.998843
57	1.01375	0.980618	1.0072	0.996129	0.997137	0.996818	1.00436	1.01132	1.00725	0.986645	1.01794	0.998255	1.00724	1.01691	0.994649	1.01061	1.01259	1.01554	1.0074	1.0028	1.01217	1.00999	1.00244	1.0026	1.00244	1.00753	1.00814	1.01015	0.998578	1.00978	0.989297	1.02082	1.01959	1.02709	0.974229	1.00106	1.00328	1.00719	1.00726	1.00624	1.00437	1.01198	0.99993	1.00459	1.01057	1.00451	1.00866	1.00648	0.999703
58	1.01629	0.986134	1.00956	1.00502	1.00221	1.00268	1.00956	1.01219	1.01048	0.992814	1.01971	1.0025	1.01312	1.02324	0.995632	1.01477	1.01529	1.0202	1.01129	1.0099	1.0176	1.01205	1.00244	1.00622	1.00162	1.01127	1.01459	1.01435	1.00471	1.01606	0.996362	1.02369	1.03143	1.03424	0.976092	1.00658	1.00609	1.01205	1.01404	1.00973	1.01087	1.01538	1.00237	1.00672	1.01928	1.00949	1.01237	1.01223	1.00307
59	1.0167	0.987507	1.01361	1.00342	0.997143	1.00662	1.00776	1.01619	1.0015	0.993517	1.02016	1.00549	1.01607	1.02397	0.995919	1.01629	1.01896	1.01775	1.01082	1.01146	1.01734	1.01402	1.00155	1.00386	1.00712	1.01376	1.00963	1.01533	1.00632	1.01458	0.99959	1.02742	1.03277	1.03408	0.978386	1.00604	1.00739	1.00986	1.01387	1.01169	1.01098	1.01705	1.01134	1.01225	1.01708	1.0125	1.01616	1.01487	1.00162
60	1.01738	0.987889	1.01163	0.999793	0.998057	1.0056	1.0099	1.02048	1.01282	0.992446	1.01952	1.00063	1.01313	1.02355	0.998129	1.01408	1.01698	1.02275	1.01278	1.00939	1.02098	1.01292	1.00447	1.00813	0.999868	1.01465	1.01543	1.01555	1.01116	1.01668	0.99789	1.02565	1.04033	1.04043	0.977456	1.01393	1.00892	1.00974	1.01449	1.01325	1.01099	1.01855	1.00866	1.01632	1.01835	1.01218	1.01749	1.01519	1.00539
61	1.01829	0.990839	1.01046	0.995217	0.993897	0.999297	1.00527	1.02305	0.999891	0.988908	1.01836	0.99574	1.01081	1.02208	0.998616	1.00734	1.01463	1.01984	1.01163	1.00978	1.01789	1.01178	1.0046	1.01	1.00273	1.01212	1.01508	1.01412	1.00844	1.01599	0.995386	1.01393	1.03111	1.03807	0.977196	1.01028	1.0076	1.00584	1.01489	1.00966	1.01137	1.01855	1.00935	1.01332	1.01742	1.01173	1.01727	1.01818	1.00239
62	1.01693	0.988408	1.00744	0.995447	0.990806	0.997984	1.00462	1.02691	1.00313	0.985669	1.0092	0.994282	1.00527	1.01246	0.998285	1.00961	1.01567	1.01725	1.00973	1.01095	1.01434	1.01299	1.00275	1.01143	1.00138	1.01401	1.01401	1.01469	1.00891	1.0153	0.9934	1.01109	1.02849	1.0372	0.977689	1.01593	1.0081	1.00122	1.01138	1.00497	1.006	1.01777	1.00987	1.01183	1.01335	1.01301	1.01401	1.01523	1.00117
63	1.01076	0.984437	1.0014	0.989577	0.986678	0.994137	1.00039	1.02098	0.993325	0.978946	1.00485	0.988997	1.0009	1.01201	0.99893	1.00944	1.01221	1.01464	1.00839	1.01385	1.00655	1.01072	1.00384	1.00619	1.00321	1.00926	1.01176	1.01522	1.0085	1.011	0.982612	1.01134	1.02305	1.03401	0.973772	1.01632	1.00061	0.996263	1.00394	1.00393	1.00569	1.01649	1.00969	1.00838	1.01104	1.00977	1.01231	1.01508	1.00131
64	1.01083	0.982474	1.00249	0.986543	0.990094	0.992079	0.999352	1.01962	0.994972	0.974552	1.00093	0.989237	0.996771	1.00616	0.997058	1.00811	1.00897	1.00789	1.00755	1.01586	1.00836	1.00974	1.00476	1.00975	1.0018	1.00956	1.01489	1.01383	1.00517	1.0099	0.98018	1.00299	1.0211	1.02784	0.97108	1.01572	0.999158	0.996389	1.00795	1.00245	1.00305	1.01296	1.00902	1.00855	1.01249	1.00902	1.01019	1.01402	0.999934
65	1.00766	0.981299	1.00042	0.98749	0.987998	0.992282	0.997817	1.0171	1.0021	0.97439	1.0042	0.984039	0.994846	1.00658	0.997668	1.00834	1.00878	1.01074	1.00821	1.01102	1.00948	1.00989	1.0012	1.00623	1.00203	1.00563	1.00793	1.01518	1.0065	1.00789	0.975711	1.00528	1.02185	1.03388	0.967227	1.00851	0.997435	0.991929	1.00871	1.00128	0.999626	1.0137	1.00897	1.00812	1.0107	1.01002	1.00828	1.01418	1.00301
66	1.00491	0.977365	0.997664	0.985473	0.984774	0.990019	0.99587	1.01685	0.996229	0.970381	0.997967	0.981666	0.98965	1.00283	0.994616	1.00471	1.00785	1.0075	1.0057	1.01305	1.00467	1.00761	1.00154	1.00449	1.00106	1.00597	1.01019	1.01312	1.00179	1.00267	0.969749	0.999824	1.01798	1.02841	0.966363	1.00472	0.994286	0.995467	1.00436	0.99582	0.995672	1.00978	1.00639	1.00555	1.00635	1.0037	1.00507	1.00905	0.997919
67	1.00029	0.976145	0.996664	0.984887	0.983361	0.98818	0.994298	1.01452	0.999991	0.973741	0.996968	0.978775	0.987789	0.996613	0.993022	1.00242	1.00515	1.00544	1.00441	1.01055	1.00402	1.0057	1.00212	1.00216	1.00062	1.00464	1.0104	1.00784	1.00182	0.999997	0.966335	0.994588	1.01175	1.02523	0.965521	1.00799	0.991488	0.990594	1.00363	0.99755	0.993022	1.00972	1.00368	1.00299	1.00649	1.00267	1.00398	1.00671	0.998896
68	1.00166	0.975903	0.995499	0.983617	0.987422	0.987181	0.990219	1.01524	1.00013	0.968758	0.99591	0.978615	0.985419	0.998316	0.99496	1.00409	1.00018	1.00491	1.00473	1.01081	1.00551	1.00272	1.00449	1.0046	1.00248	1.00496	1.01147	1.01071	1.00016	1.00033	0.966441	0.999159	1.01514	1.02953	0.96495	1.00212	0.986243	0.988777	1.00161	0.996369	0.989282	1.0111	1.00634	1.00538	1.00573	1.00013	1.00063	1.00696	0.998658
69	0.996912	0.975341	0.993537	0.983229	0.983349	0.984077	0.988989	1.01526	0.99851	0.965636	0.993036	0.977643	0.982019	0.993476	0.993669	1.00052	1.00091	1.00418	1.0026	1.00828	1.00422	1.00424	1.00083	1.00401	0.998606	1.00349	1.00895	1.00854	0.999407	0.998471	0.964098	0.995222	1.01004	1.02495	0.962729	1.00242	0.988023	0.987495	1.00141	0.993228	0.990225	1.00901	1.00389	1.00422	1.00401	0.998283	0.999953	1.00494	0.997094
70	0.997743	0.974672	0.990014	0.978812	0.98228	0.98374	0.988226	1.01514	0.995863	0.968381	0.992756	0.977021	0.981141	0.992804	0.994752	1.0001	0.996443	1.0028	1.00203	1.00645	1.00337	1.0034	1.00243	1.00282	1.00127	1.00173	1.00336	1.00937	1.00013	0.997418	0.96772	0.995381	1.00905	1.02538	0.961841	0.997815	0.986434	0.98535	0.996131	0.990427	0.98948	1.00921	1.00264	1.00469	1.00563	0.996614	1.00003	1.0007	0.996244
71	0.994437	0.975714	0.988239	0.974996	0.978888	0.98137	0.984171	1.01066	0.987962	0.965508	0.989135	0.972111	0.97896	0.99097	0.991742	0.997075	0.995809	1.00024	1.00185	1.00376	1.00019	0.99861	1.00027	1.00014	0.999242	0.9988	1.00477	1.00585	1.00171	0.990461	0.964396	0.99125	1.00783	1.02757	0.95966	1.00038	0.982721	0.983529	0.995208	0.987236	0.985098	1.00228	1.0012	1.00141	1.00269	0.995174	0.996356	0.998548	0.996111
72	0.992539	0.972463	0.985413	0.975377	0.978472	0.981496	0.986873	1.00867	0.986446	0.96395	0.987736	0.971725	0.980032	0.990357	0.990923	0.998058	0.996386	0.997271	1.00046	1.00427	1.00023	0.999532	1.00057	1.00008	0.996211	0.996186	1.00055	1.0045	0.996915	0.98826	0.962479	0.989939	1.00153	1.01977	0.959333	0.994741	0.981647	0.980752	0.990418	0.985259	0.9829	1.00476	0.997175	0.996633	1.00018	0.992887	0.995641	0.996757	0.996914
73	0.984459	0.971701	0.9824	0.972831	0.975183	0.979588	0.984462	1.00586	0.985484	0.962865	0.9802	0.969803	0.976712	0.991257	0.991105	0.99638	0.989952	0.998993	0.997881	1.00116	0.998439	1.00013	1.0013	1.00233	0.995519	0.998498	1.00409	1.00207	0.997303	0.985846	0.961244	0.98544	1.00069	1.02241	0.95597	0.991102	0.982459	0.979591	0.986825	0.982591	0.982943	1.0001	0.996338	0.997365	0.997477	0.987131	0.991205	0.99499	0.997583
74	0.987972	0.971189	0.985427	0.974627	0.975629	0.977955	0.988672	1.00494	0.985563	0.964488	0.978702	0.969563	0.979088	0.990296	0.990146	0.995185	0.991839	0.996227	0.997732	1.00058	0.998251	0.999498	1.00193	1.00175	0.994188	1.00154	0.999749	1.00329	0.993569	0.987263	0.963352	0.982579	0.997777	1.02414	0.956465	0.996963	0.982858	0.981179	0.987638	0.983653	0.984824	0.995937	0.997585	0.995712	0.996297	0.987141	0.993021	0.995573	0.99606
75	0.987605	0.972322	0.985253	0.977792	0.979937	0.981907	0.99031	1.0051	0.983546	0.965643	0.976747	0.97346	0.979886	0.988635	0.98989	0.995594	0.993125	1.00138	0.998868	0.999934	0.997776	1.00106	0.998292	1.00117	0.996477	0.99935	1.00018	0.999176	0.991762	0.987825	0.962669	0.985258	1.00093	1.02315	0.957112	0.987431	0.983663	0.981757	0.988833	0.983671	0.982288	0.998603	0.99464	0.997408	0.998046	0.989188	0.993331	0.995512	0.996688
76	0.989148	0.97557	0.985944	0.986351	0.983056	0.98335	0.991164	1.00373	0.995602	0.967382	0.976276	0.973279	0.98218	0.991806	0.988899	1.00153	0.99681	1.00532	1.00201	1.0029	1.00033	1.00448	0.998233	1.00174	0.994578	0.99901	0.997995	1.00116	0.993885	0.991607	0.96546	0.988466	1.00648	1.03053	0.962229	0.991979	0.982793	0.982929	0.992954	0.987175	0.98755	0.999308	0.99451	0.997764	0.997423	0.987358	0.990364	0.992062	0.998164
77	0.986761	0.980374	0.987806	0.98982	0.985919	0.985098	0.994523	1.0031	0.993106	0.971881	0.975306	0.977352	0.984771	0.992401	0.989339	1.00265	0.996961	1.00649	1.00042	1.00228	1.00229	1.00387	0.999834	0.995962	0.996117	0.9991	1.00103	1.00072	0.993339	0.99187	0.968943	0.986846	1.00604	1.03349	0.962407	0.988305	0.988065	0.986755	0.993316	0.987077	0.988751	1.00137	0.995593	0.998062	0.997722	0.985029	0.99365	0.994989	0.99659
78	0.9894	0.984802	0.992187	0.99356	0.989895	0.990192	0.997494	1.00436	0.999376	0.975903	0.974201	0.980659	0.985556	0.995686	0.990607	1.00588	1.00343	1.00896	0.997562	1.00432	1.002	1.0065	1.00106	0.995193	0.994795	1.00018	0.996775	1.00522	0.993543	0.993085	0.970354	0.988319	1.00927	1.03663	0.966352	0.987683	0.992314	0.989036	0.998982	0.990161	0.990141	0.99907	0.993544	0.995237	0.997605	0.985433	0.995934	0.996781	0.999943
79	0.993696	0.991619	0.995125	0.997253	0.992819	0.997302	1.00157	1.00449	1.00618	0.979467	0.976849	0.986233	0.993164	1.00216	0.988759	1.01114	1.00506	1.01263	1.00017	1.00511	1.006	1.01142	1.00071	1.00003	0.996733	0.998232	0.999306	1.00711	0.995537	0.998531	0.976374	1.00493	1.02539	1.04612	0.969329	0.996917	0.993964	0.992534	1.00249	0.993235	0.993811	0.999721	0.995918	0.997401	1.00066	0.988447	0.997368	0.997177	1.00118
80	0.992566	0.996964	0.998154	1.00338	0.99817	0.999133	1.00553	1.00462	1.01313	0.986009	0.980823	0.987371	0.995376	1.00635	0.990045	1.0128	1.00644	1.01493	1.0003	1.00755	1.00882	1.01362	0.998947	1.00078	0.996475	1.00352	1.00083	1.00857	0.995306	1.00288	0.978419	1.01042	1.02949	1.04846	0.975189	0.993431	1.00044	0.996229	1.00699	0.996953	0.997198	1.00642	0.99586	0.997229	1.00326	0.991983	1.00304	1.00196	1.00164
81	0.99602	1.00492	1.00793	1.00777	1.00292	1.00355	1.00937	1.00304	1.01604	0.990606	0.986462	0.992131	0.997383	1.00442	0.992278	1.01519	1.01233	1.01694	1.00106	1.01129	1.01322	1.01556	1.00053	1.00036	1.00119	1.00612	1.00379	1.00969	0.999939	1.00372	0.981101	1.01266	1.03232	1.05235	0.97506	0.997191	1.00468	0.99956	1.01081	1.00234	1.00098	1.00381	0.993764	1.00099	1.00661	0.997144	1.00419	1.00288	1.00377
82	0.996076	1.01068	1.01295	1.00771	1.00517	1.00469	1.00884	1.00082	1.01737	0.995146	0.988009	0.991725	0.998151	1.01476	0.991987	1.01804	1.01454	1.01736	1.00557	1.01376	1.01584	1.02192	0.999408	1.00403	1.00143	1.00305	1.00599	1.01501	0.999066	1.00748	0.983981	1.02104	1.04118	1.05972	0.97854	0.998749	1.00691	1.00252	1.01558	1.00454	1.00323	1.00674	0.996904	1.00512	1.00865	1.0004	1.00613	1.00111	1.0071
83	1.00087	1.00976	1.01481	1.01085	1.00405	1.00856	1.01038	1.00686	1.01959	0.997009	0.987635	0.993709	0.997163	1.00663	0.99944	1.01825	1.01742	1.01726	1.00422	1.01531	1.01655	1.02223	0.999831	1.00723	1.00325	1.00857	1.0079	1.01078	1.00039	1.00998	0.983711	1.02292	1.04023	1.05848	0.980859	1.00611	1.00676	1.0048	1.01341	1.00632	1.00452	1.00905	0.997824	1.00948	1.00947	1.00142	1.0071	1.00668	1.00396
84	1.00623	1.00985	1.0164	1.01031	1.00247	1.00872	1.00857	1.01101	1.01988	0.996799	0.988852	0.999329	0.999658	1.01668	1.00147	1.01866	1.017	1.01929	1.00258	1.01661	1.0195	1.02305	1.0025	1.00189	1.00119	1.01502	1.00926	1.01615	1.00267	1.01264	0.982213	1.02548	1.04345	1.05935	0.982563	1.0082	1.00985	1.00434	1.01607	1.00536	1.0056	1.00919	1.00182	1.00908	1.01309	1.00539	1.00972	1.00654	1.00752
85	1.00412	1.00762	1.00856	1.00662	1.00192	1.00513	1.00726	1.01296	1.01328	0.993565	0.992424	0.992217	0.996426	1.00567	1.00171	1.01192	1.01535	1.0189	1.00006	1.01322	1.01539	1.01519	1.00254	1.00728	1.00497	1.01117	1.00685	1.01436	1.00474	1.01082	0.978109	1.02365	1.03482	1.05411	0.981175	1.01046	1.00762	0.999899	1.01458	1.0014	1.00257	1.01042	1.00271	1.01101	1.01267	1.00634	1.00898	1.00848	1.0053
86	1.00278	1.00358	1.00754	1.00217	1.00413	1.00499	1.00663	1.01515	1.01125	0.990036	0.988065	0.988425	0.996012	1.00632	1.00134	1.00565	1.01625	1.01543	0.997051	1.01477	1.01128	1.01413	1.00226	1.00571	1.00341	1.01155	1.00345	1.01227	1.00196	1.00815	0.97611	1.02018	1.02598	1.04922	0.978359	1.00997	1.00359	0.999438	1.01317	0.99786	1.00142	1.00953	1.00668	1.00947	1.00995	1.00464	1.00356	1.00686	1.00489
87	0.997967	0.999173	1.00206	1.00149	1.00517	1.00364	1.00697	1.01154	1.00757	0.990303	0.990345	0.98882	0.994657	0.99976	1.00295	1.00334	1.01427	1.0124	0.995208	1.01508	1.01138	1.01844	1.00253	1.00844	1.00691	1.01114	1.00317	1.01037	1.00173	1.00945	0.973399	1.01809	1.02358	1.048	0.97982	1.01155	1.00167	0.995599	1.01262	0.995854	1.00061	1.01148	1.00357	1.0105	1.01021	1.00545	1.00692	1.00479	1.00215
88	0.998545	0.99836	1.00282	1.00303	1.00296	1.0051	1.00471	1.0119	1.00701	0.987835	0.994283	0.990972	0.995155	1.00447	1.00065	1.00295	1.01363	1.01362	0.996387	1.01872	1.00872	1.01748	1.00089	1.00735	1.00169	1.01093	1.00231	1.00951	0.999013	1.00592	0.971439	1.02235	1.0255	1.04338	0.978874	1.01139	1.00208	0.99566	1.0092	0.997137	0.999001	1.00831	1.0098	1.00963	1.01133	1.00498	1.00747	1.00686	1.00667
89	0.989729	0.995234	0.998549	0.995429	0.999753	0.999743	1.00308	1.01467	1.00212	0.981691	0.991999	0.987775	0.991062	0.9989	0.999309	1.00125	1.00895	1.01187	0.993233	1.01678	1.00303	1.01555	1.00036	1.00637	1.00724	1.00985	1.00281	1.00809	0.999628	1.00121	0.968813	1.01117	1.02307	1.03642	0.978254	1.00985	0.997958	0.992771	1.00603	0.992882	0.998225	1.00875	1.00219	1.00915	1.00853	1.00286	1.00282	1.00841	1.00356
90	0.988629	0.995607	0.998092	0.997169	1.0006	1.00083	1.0001	1.0121	0.999942	0.983777	0.991663	0.98731	0.989513	1.00092	1.00161	0.998102	1.01034	1.012	0.992441	1.01181	1.00192	1.01307	1.00206	1.00406	1.00647	1.00998	0.999696	1.00615	0.998816	1.00036	0.967139	1.01154	1.01897	1.02857	0.977259	1.00973	0.998888	0.992349	1.00803	0.995096	0.995967	1.01062	1.00324	1.00772	1.00768	1.00095	1.00384	1.0046	1.0034
91	0.9857	0.995558	0.993032	0.992498	0.998065	1.00091	0.9978	1.00988	0.995426	0.981003	0.98703	0.985293	0.984695	1.00621	0.997162	0.997985	1.0075	1.00763	0.991311	1.0108	0.997444	1.01071	1.00107	1.00493	1.00514	1.00645	0.99791	1.00576	0.992172	0.997763	0.96436	1.0125	1.01952	1.02109	0.975582	1.00636	0.995624	0.988463	1.00018	0.990528	0.99335	1.00618	1.00471	1.009	1.0032	0.995373	1.00189	1.00339	1.00276
92	0.980597	0.993838	0.990668	0.993015	0.993067	0.997372	0.993949	1.0109	0.991622	0.978929	0.985912	0.982447	0.9839	0.997001	0.997265	0.995208	1.00623	1.00576	0.989195	1.0081	0.996324	1.00745	1.00325	1.00172	1.00525	1.00502	0.997923	1.00173	0.991344	0.995883	0.962838	0.998142	1.01251	1.01849	0.976048	1.00625	0.995205	0.988224	0.998898	0.993332	0.989757	1.00533	1.00274	1.00558	1.00324	0.992487	0.999322	1.00029	1.00252
93	0.9853	0.990448	0.988139	0.989394	0.993232	0.995472	0.995137	1.00702	0.991969	0.978721	0.984519	0.982645	0.981827	0.998838	0.997181	0.995891	1.00292	1.00469	0.988249	1.00535	0.997662	1.007	1.00118	1.00022	1.00448	1.00121	0.997667	1.00222	0.993155	0.989245	0.962704	0.998548	1.0128	1.01375	0.975758	1.00459	0.99354	0.986939	0.997127	0.989307	0.989622	1.00444	0.999118	1.00377	1.00216	0.992529	0.99732	0.999456	1.00016
94	0.979783	0.988654	0.985021	0.985351	0.989568	0.992142	0.990299	1.00441	0.986402	0.974888	0.9851	0.982242	0.97782	0.99561	0.997115	0.993569	0.999564	1.00252	0.987571	1.00207	0.994576	1.00206	0.999797	1.00153	1.00379	0.996753	0.99531	0.997938	0.988012	0.99066	0.961161	1.0021	1.00944	1.00743	0.974043	1.00449	0.992305	0.985175	0.99364	0.991314	0.985871	0.999624	1.00164	1.00577	0.997019	0.99257	0.999145	0.997142	1.00092
95	0.979265	0.987884	0.982935	0.978768	0.989567	0.98793	0.987199	0.998182	0.980942	0.972855	0.981851	0.977945	0.972059	0.986174	0.998695	0.993466	0.996891	0.997295	0.98955	0.996142	0.993612	1.00084	1.00003	0.998381	1.0018	0.996705	0.993541	0.995067	0.988338	0.981005	0.961427	0.989931	1.00196	1.00156	0.970681	1.00104	0.988766	0.984904	0.991512	0.986217	0.983274	0.996487	0.99866	0.999708	0.99424	0.984726	0.991999	0.990531	0.99798
96	0.984681	0.989133	0.981129	0.979151	0.993426	0.992967	0.989436	0.999039	0.985554	0.974183	0.983016	0.979967	0.975524	0.998742	0.996501	0.994335	0.99555	0.999448	0.99274	0.994472	0.9974	0.996942	1.00204	0.998841	0.99704	0.996687	0.992183	0.998497	0.992265	0.98625	0.96569	0.998596	1.00712	0.998956	0.973772	1.00447	0.989768	0.98729	0.991961	0.986462	0.986515	0.998713	0.995124	1.00192	0.996098	0.986402	0.995932	0.996156	1.00152
97	0.985533	0.987209	0.983721	0.979036	0.991378	0.990773	0.988855	0.999439	0.981866	0.977196	0.979944	0.977144	0.974568	0.99182	0.997287	0.994623	0.994159	0.999434	0.993677	0.992507	0.997458	0.994589	0.999325	0.996044	1.00077	0.99487	0.993144	0.994968	0.989875	0.983344	0.964627	0.996231	1.0014	0.996344	0.97586	1.00192	0.9897	0.98677	0.993167	0.983889	0.983424	0.99646	0.995317	0.998369	0.992209	0.98839	0.992547	0.992758	0.997366
98	0.983706	0.987302	0.982285	0.978531	0.990915	0.988846	0.990179	0.998073	0.984767	0.975422	0.97847	0.980803	0.974766	0.995617	0.997079	0.993852	0.992092	0.997919	0.990111	0.990679	0.996079	0.992102	0.999513	0.993021	1.00055	0.992056	0.990588	0.993662	0.985724	0.987623	0.970112	0.99312	0.997544	0.993071	0.972838	1.00053	0.989422	0.987438	0.991636	0.984324	0.984938	0.99607	0.993949	0.998307	0.990101	0.984168	0.99054	0.989616	0.997859
99	0.983972	0.987218	0.982961	0.97995	0.993646	0.989623	0.990352	0.995268	0.986294	0.980747	0.979206	0.978578	0.975528	0.993753	0.994882	0.994219	0.993471	0.997224	0.986316	0.991473	0.994775	0.993325	0.998553	0.993255	0.9993	0.990033	0.993403	0.992588	0.991305	0.986437	0.969468	0.992352	0.997758	0.994091	0.9755	0.996282	0.988551	0.989698	0.993834	0.98475	0.98499	0.993261	0.99451	0.997338	0.988386	0.988004	0.989935	0.992136	0.998562
100	0.987172	0.99117	0.986358	0.983264	1.00078	0.991588	0.992485	0.993726	0.987183	0.983252	0.983565	0.979081	0.980423	1.00054	0.999185	0.995587	0.994515	0.998175	0.985651	0.986009	0.999194	0.992352	0.99834	0.993287	0.996955	0.990311	0.991739	0.995843	0.990092	0.985254	0.971491	0.994057	0.999726	0.994688	0.977771	0.99195	0.988438	0.995917	0.991491	0.986153	0.984022	0.992589	0.991727	0.995094	0.990823	0.992893	0.987918	0.991994	0.999617
101	0.986385	0.993568	0.989036	0.983261	1.00483	0.99224	0.995461	0.989859	0.987798	0.984835	0.98187	0.985954	0.984162	0.996899	0.999276	0.997098	0.997452	0.999279	0.984378	0.985982	0.99682	0.992975	1.00043	0.995796	0.997352	0.991969	0.995449	0.992874	0.991853	0.988289	0.98171	0.994891	0.999731	0.992984	0.979129	0.994976	0.991365	0.999038	0.991853	0.984685	0.988804	0.993391	0.9935	0.995551	0.989394	0.988532	0.993801	0.988572	0.999546
102	0.987749	0.995628	0.992519	0.990456	1.00571	0.995769	0.995344	0.988821	0.991726	0.985422	0.980666	0.985055	0.985608	1.00062	0.999897	0.998215	1.00131	1.00239	0.986317	0.98784	1.00073	0.994051	0.999436	0.992983	1.00034	0.994775	0.992719	0.993004	0.99185	0.988575	0.982101	0.996371	1.00122	0.992934	0.980508	0.995632	0.995127	1.00025	0.991979	0.991658	0.990144	0.993339	0.990685	0.994802	0.990266	0.99387	0.993303	0.99301	1.00094
103	0.986248	1.00248	1.00041	0.994562	1.0116	0.999221	1.0011	0.989638	0.995146	0.989285	0.983447	0.992164	0.989752	1.00711	1.00299	1.00068	1.00416	1.00713	0.990607	0.988705	1.00497	0.995649	0.997966	0.994508	0.9967	0.994674	0.995465	0.995844	0.994342	0.99187	0.992083	1.0042	1.01166	0.998479	0.985749	0.996266	0.997825	1.00594	0.995947	0.99304	0.994775	0.995183	0.991161	0.994062	0.9939	0.991043	0.998365	0.996352	1.00378
104	0.990287	1.00425	1.00226	0.997493	1.01943	1.00127	1.00181	0.990498	0.999287	0.99088	0.986633	0.994729	0.995159	1.00776	1.00462	1.00347	1.00558	1.00767	0.9923	0.992556	1.00496	0.998184	0.998589	0.996088	0.995517	0.997493	0.995644	0.99683	0.994655	0.99747	0.996771	1.00417	1.01005	0.997072	0.991964	0.994569	1.00155	1.00827	1.00065	0.997998	0.997114	0.995525	0.991105	0.996083	0.994348	0.998172	0.997386	0.998024	1.00448
105	0.987492	1.00699	1.00694	1.00315	1.01684	1.00782	1.00417	0.990688	1.00535	0.997454	0.992265	0.998787	0.99759	1.01209	1.00166	1.00506	1.00854	1.01166	0.996547	0.993994	1.0088	0.997095	0.999708	0.999161	0.995379	0.999086	1.00033	1.00038	0.998631	1	0.998824	1.01385	1.01305	0.997458	0.993135	0.995305	1.00248	1.00981	1.00359	1.00222	0.99915	0.997409	0.990265	1.00017	1.00125	0.994414	0.996136	0.999421	1.00485
106	0.991204	1.00988	1.0157	1.00147	1.01861	1.0077	1.00417	0.992369	1.01125	0.996565	0.988526	1.00134	0.996614	1.0101	1.00265	1.00345	1.0103	1.01168	0.998187	0.993541	1.00707	1.00173	0.999516	0.998281	0.994802	0.997773	1.0013	1.00024	1.00073	1.00299	1.00335	1.0104	1.01229	0.997286	0.994813	0.996841	1.00087	1.01408	1.00686	1.00402	0.999869	0.997658	0.992541	1.00052	0.994354	0.996009	1.00406	1.00241	1.00458
107	0.99192	1.01829	1.01484	1.02109	1.01641	1.01211	1.00538	0.992561	1.01346	1.00239	0.993176	1.00095	0.999372	1.01434	1.00628	1.00547	1.00901	1.0093	1.00187	0.997113	1.00866	1.00226	0.998266	1.00307	0.995318	1.00291	1.00157	1.00474	1.00113	1.0071	1.00422	1.01884	1.01011	1.0012	0.99976	0.996321	1.00486	1.01268	1.00592	1.00759	1.00092	0.998427	0.996204	1.00564	0.99441	0.997982	1.003	1.0035	1.00845
108	0.995646	1.01704	1.01391	1.01829	1.01213	1.00587	1.00841	0.999042	1.01449	1.0013	0.99538	0.997604	1.00108	1.01348	1.0096	1.00431	1.0087	1.01303	1.00198	0.999278	1.00471	0.999889	1.00024	1.0014	1.00182	1.00463	1.00218	1.00556	1.0001	1.00806	1.00487	1.0217	1.01133	0.994622	0.998156	0.998786	1.00819	1.01168	1.01018	1.00579	1.00028	1.00568	0.996465	1.00854	0.995404	0.996766	1.00457	1.0098	1.00928
109	0.993356	1.01239	1.01619	1.01879	1.0092	1.00845	1.00804	1.00022	1.01196	0.999894	0.995892	0.997166	0.997068	1.00495	1.00751	1.00434	1.0051	1.01038	1.00264	0.99933	1.00543	0.99973	1.00013	1.00368	1.00023	1.00796	1.00388	1.00788	1.00608	1.00887	1.00669	1.02265	1.00714	0.995906	0.99972	1.00016	1.00405	1.01427	1.00807	1.0039	1.00425	1.00418	0.998057	1.00921	0.995487	0.996765	1.00609	1.00779	1.00587
110	0.992992	1.00791	1.00894	1.01728	1.00585	1.00856	1.00245	1.00054	1.007	1.0021	0.989706	0.994542	0.99779	1.00492	1.00587	1.00425	1.00552	1.00852	1.00257	1.00347	1.00526	1.00113	0.999371	1.0021	0.998454	1.00634	1.00371	1.00467	1.00334	1.00842	1.00464	1.01846	1.00489	0.99424	1.00074	1.00116	0.999317	1.00832	1.00437	1.00443	1.00238	1.00538	0.996061	1.00821	0.99824	0.997424	1.00507	1.01041	1.00446
111	0.993856	1.01162	1.00487	1.01382	1.00489	1.0084	1.00427	1.00783	1.01099	1.00591	0.989364	0.997016	1.00036	1.00673	1.01067	1.00396	1.00528	1.00842	1.00322	1.00238	1.00385	1.00119	1.00265	1.00292	1.00034	1.00933	1.00475	1.00201	1.00484	1.00475	1.00464	1.01755	1.00256	0.992379	1.00437	1.00619	0.99881	1.00664	1.00387	1.00692	1.00357	1.00758	1.00604	1.00574	1.00267	0.99847	1.00819	1.00608	1.00766
112	0.991216	1.00989	1.00498	1.01455	0.999303	1.00515	0.9985	1.00413	1.00777	1.0041	0.986698	0.997981	0.997423	1.00459	1.00588	1.00089	1.00339	1.00369	1.00339	1.00427	1.00329	0.999249	0.999849	1.00266	0.997632	1.00847	1.00212	1.00067	1.00389	1.00243	1.00173	1.01385	0.998945	0.987693	1.00199	1.00415	0.996241	1.00485	1.00302	1.00264	1.00395	1.0073	1.00177	1.00987	1.00004	0.999241	1.00286	1.00779	1.00201
113	0.991457	1.00809	1.00005	1.0139	0.997724	1.00294	0.995839	1.00528	1.00577	1.00234	0.988757	0.995699	0.997398	0.998084	1.00585	1.00198	1.00363	1.00388	1.00156	1.00241	0.998831	1.00003	1.00172	1.00153	0.997666	1.00811	1.00118	1.00046	1.00527	1.00153	1.00223	1.00924	0.995259	0.986392	1.00415	1.00537	0.993757	1.0035	1.0022	1.00355	1.00109	1.00204	1.00106	1.00833	0.999885	1.00005	1.00705	1.00814	1.00246
114	0.98738	1.00702	1.00094	1.01158	0.995231	1.0037	0.993369	1.00699	1.0032	1.00478	0.987306	0.996623	0.996526	0.99479	1.01686	0.999873	1.00053	0.999491	1.00049	1.00064	0.998786	0.997282	1.0023	1.00414	1.00208	1.00454	1.00385	0.998605	1.00122	1.00064	0.999799	1.00728	0.995835	0.98414	1.00542	1.0076	0.995549	1.00066	1.00018	1.00131	1.00006	1.00072	1.00406	1.00479	1.00131	0.997014	1.00341	1.01008	1.00036
115	0.989306	1.00028	0.996989	1.00787	0.996258	1.00117	0.991408	1.00457	1.00281	1.00366	0.990464	0.996245	0.993992	0.996606	1.00549	0.997736	0.997707	0.999846	1.00065	1.00041	0.995758	0.995951	1.00281	1.00405	1.00436	1.00515	1.00319	0.997813	1.00147	0.998037	0.998427	1.00507	0.995807	0.981286	1.00485	1.00761	0.994124	1.00174	0.998788	0.998929	1.00031	1.00052	1.00085	1.00558	1.00105	1.00178	1.00465	1.00462	0.999596
116	0.987813	1.00257	0.99098	1.00569	0.989084	1.00019	0.989247	1.00025	0.99782	1.00897	0.987938	0.994479	0.992986	0.991365	1.00376	0.995234	0.995839	0.996442	0.99779	0.995514	0.994353	0.995159	0.99915	1.00194	1.00117	1.00266	1.00031	0.993887	0.996158	0.992627	0.991552	0.99849	0.992234	0.974358	1.00582	1.00493	0.992053	0.998878	0.995963	0.997257	0.995222	1.00044	1.00137	1.00165	0.996457	0.99855	0.998081	1.00171	0.999486
117	0.988816	0.996838	0.987641	0.998372	0.990463	0.996078	0.990352	0.998331	0.995432	1.00498	0.987697	0.995831	0.988602	0.986956	1.00273	0.992115	0.994263	0.993528	0.998432	0.994079	0.992123	0.991778	1.00028	1.00203	1.00042	1.00073	1.00055	0.990955	0.998275	0.992721	0.991228	0.994973	0.990515	0.971888	1.00294	1.00344	0.988425	0.9978	0.993345	0.997851	0.995494	0.998236	0.999262	1.0003	0.996433	0.997935	0.997041	0.998155	0.995066
118	0.990657	0.995229	0.987971	0.998703	0.98866	0.995907	0.988001	0.995399	0.993358	1.00347	0.986274	0.995461	0.98852	0.989083	1.00224	0.991553	0.991628	0.994227	0.998071	0.99413	0.989474	0.990999	0.998295	0.99836	0.997679	0.996029	0.997934	0.989693	0.99821	0.987664	0.991585	0.991596	0.98869	0.968468	1.00402	1.00108	0.988057	0.995715	0.992743	0.994766	0.994926	0.995528	0.998684	0.998436	0.993498	0.997842	0.989228	0.996652	0.995959
119	0.99116	0.996833	0.985366	0.999693	0.988889	0.995196	0.988117	0.993688	0.992652	1.00232	0.985086	0.998247	0.990259	0.987577	1.00394	0.991276	0.990641	0.993256	0.996792	0.993979	0.988032	0.987253	1.00063	0.998904	1.00065	0.996091	0.99747	0.988534	0.996576	0.989426	0.992957	0.991417	0.985074	0.967088	1.004	1.00152	0.990418	0.994645	0.992503	0.996993	0.993772	0.993555	0.999659	0.998819	0.991595	0.999795	0.995578	0.995967	0.994819
120	0.990689	0.994116	0.984589	0.999062	0.990646	0.9938	0.991463	0.991286	0.990595	1.00067	0.987535	0.992873	0.990062	0.989143	1.00194	0.989344	0.987283	0.990359	0.994466	0.987463	0.988857	0.988381	0.999896	0.996335	0.998518	0.994115	0.990897	0.990171	0.997719	0.986342	0.993891	0.986195	0.983474	0.965811	1.00438	0.998568	0.98916	0.992905	0.989465	0.991142	0.993105	0.991794	0.997054	0.993893	0.987176	0.998857	0.987214	0.992548	0.994556
121	1.00001	0.998849	0.987716	0.999931	0.991577	0.991726	0.993373	0.993226	0.990686	1.00268	0.989523	0.995919	0.992007	0.99095	1.00151	0.991886	0.987413	0.993206	0.998197	0.991107	0.984769	0.98982	1.00032	0.996825	1.00164	0.990787	0.992528	0.992349	0.997228	0.989648	1.00206	0.993368	0.988117	0.968839	1.00471	1.00095	0.990639	0.996743	0.991411	0.997241	0.993106	0.989554	0.993728	0.997647	0.989888	1.001	0.993663	0.994903	0.996198
122	0.991716	0.995706	0.981707	0.995094	0.992534	0.992697	0.991605	0.98796	0.989186	1.00074	0.98979	0.997214	0.992313	0.986899	0.999997	0.992067	0.987724	0.989185	0.995351	0.987202	0.986018	0.987335	1.00047	0.996715	0.997953	0.988243	0.987215	0.987123	0.998015	0.988186	1.00036	0.983354	0.981538	0.967219	1.00114	0.994164	0.988796	0.993254	0.9893	0.995638	0.991497	0.988041	0.993181	0.995239	0.987825	0.993787	0.989839	0.989646	0.991546
123	1.00456	0.996314	0.988396	1.00002	0.995646	0.997111	0.993273	0.987396	0.992338	1.0022	0.997021	0.999757	0.996071	0.991287	1.00117	0.991282	0.98877	0.992148	0.999382	0.987201	0.985671	0.990048	1.0026	0.995627	0.996939	0.989229	0.989654	0.990294	0.998088	0.990177	1.00783	0.990537	0.985631	0.969909	1.00401	0.995852	0.995049	0.997264	0.99245	0.997004	0.995223	0.988051	0.992674	0.994263	0.989916	0.999344	0.995666	0.990605	1.00037
124	1.00107	1.00376	0.989367	1.002	0.998	0.997482	0.998433	0.987641	0.995927	1.00636	1.00077	1.0044	0.998719	0.994459	1.00141	0.99477	0.992496	0.9938	0.998288	0.992466	0.991924	0.991728	1.00321	0.994537	0.994907	0.990061	0.989189	0.994385	1.00107	0.991083	1.00808	0.991969	0.986238	0.971292	1.00993	0.997522	0.99691	0.997618	0.992872	1.00081	0.996742	0.988982	0.993031	0.991999	0.993761	0.998658	0.995283	0.994426	1.00174
125	1.00432	1.00191	0.993	1.00158	1.00262	0.999163	0.996964	0.986178	0.998443	1.01056	1.00042	1.00632	1.00087	0.992967	1.00025	0.992373	0.990196	0.992705	0.99731	0.988631	0.990076	0.992611	1.00192	0.996735	0.99654	0.988636	0.991137	0.991988	0.99893	0.994493	1.01182	0.99544	0.988098	0.972907	1.01102	0.9955	0.998002	1.00038	0.994878	1.00281	0.998091	0.988346	0.992947	0.991994	0.993618	0.998472	0.997981	0.992406	0.999596
126	1.00439	1.00503	1.00706	1.00711	1.00817	1.0006	1.0054	0.986715	1.0045	1.01582	1.00537	1.00738	1.00751	0.999221	1.00213	0.997761	0.99531	0.997194	1.00054	0.991005	0.993418	0.996472	0.999997	0.993924	0.995561	0.988034	0.991124	0.996995	0.999902	0.997814	1.01879	0.998821	0.993143	0.978487	1.01681	0.995911	1.00086	1.00349	0.999025	1.00449	1.00021	0.990431	0.992134	0.995423	0.994772	0.997683	0.99943	0.994219	1.00443
127	1.00787	1.00934	1.00744	1.00735	1.00994	1.00459	1.00513	0.986103	1.00097	1.01559	1.00771	1.00963	1.00737	0.994049	1.00041	0.998668	0.996349	0.998798	1.00029	0.992831	0.991809	0.995822	0.999244	0.996515	0.994962	0.990408	0.992228	0.995132	1.00102	0.999628	1.02385	1.00316	0.992873	0.979606	1.02132	0.992918	1.00014	1.00454	0.997193	1.00875	1.00045	0.986854	0.989106	0.994808	0.994318	1.00017	1.00136	0.994036	1.00298
128	1.0055	1.01365	1.00979	1.01078	1.01458	1.00872	1.00555	0.984676	1.00583	1.019	1.00869	1.00894	1.01362	0.997869	1.00045	1.00159	0.997889	0.997478	1.00016	0.996002	0.995003	0.997126	0.995983	0.994919	0.993635	0.99184	0.995955	0.996113	1.00068	1.00233	1.02815	1.00317	0.995991	0.983809	1.02476	0.994099	1.00391	1.00534	1.00262	1.01081	1.00561	0.991997	0.99379	0.997034	0.995697	1.00095	1.00164	0.996387	1.00344
129	1.01569	1.02085	1.01413	1.01478	1.01878	1.01358	1.01042	0.989064	1.00792	1.01985	1.01432	1.01366	1.0148	1.00181	1.00091	1.00277	1.00196	1.00161	1.00333	0.997063	0.998245	1.00035	0.998718	0.99789	0.996761	0.993533	1.00164	0.998096	1.00444	1.00719	1.0328	1.01112	1.00302	0.988284	1.03017	0.994285	1.00824	1.01088	1.00402	1.01272	1.00461	0.992969	0.994678	1.00007	0.998604	1.0071	1.00482	0.998939	1.00724
130	1.01363	1.01993	1.0216	1.01508	1.01717	1.01747	1.0105	0.988398	1.00653	1.02141	1.01576	1.01669	1.02075	1.00588	1.00258	1.00486	1.00112	1.00381	1.00156	0.997415	0.998278	1.00273	0.999058	0.997503	1.0007	0.997543	1.00167	0.998791	1.00216	1.011	1.03706	1.01412	1.00376	0.989692	1.03246	0.997271	1.01142	1.01127	1.00738	1.01695	1.00869	0.992771	0.999508	0.995573	0.99803	1.00808	1.00454	1.00062	1.00703
131	1.01372	1.01868	1.02428	1.01428	1.0191	1.01588	1.01321	0.995454	1.01286	1.02537	1.01856	1.01755	1.02256	1.00265	1.00096	1.00254	1.00381	1.00187	1.00215	1.00179	1.00142	1.00576	0.998427	0.996663	0.997162	0.996693	1.00188	0.999407	1.0062	1.01536	1.03879	1.00842	1.00095	0.993615	1.0341	0.996991	1.01437	1.01354	1.00793	1.01551	1.01076	0.997612	0.998649	0.9981	1.00551	1.00722	1.01291	1.00427	1.00475
132	1.01539	1.0242	1.02376	1.01284	1.01621	1.02016	1.01244	0.989975	1.01347	1.02525	1.02118	1.01955	1.02248	1.00707	1.00192	1.00368	1.00371	1.0017	1.00111	1.00042	1.00093	1.00802	0.999403	0.998488	0.999021	1.00078	1.00101	1.00153	1.00748	1.01572	1.03617	1.01068	0.997505	0.993073	1.03274	0.999092	1.01383	1.01318	1.00626	1.01565	1.01143	0.995662	1.004	0.997348	1.00296	1.00955	1.00378	1.00131	1.00664
133	1.01463	1.02115	1.01978	1.00956	1.01155	1.01469	1.01145	0.990051	1.00564	1.03208	1.01815	1.01637	1.02136	1.00324	1.00311	1.00134	0.999525	0.999876	1.00232	1.00084	0.999516	1.00569	0.997739	0.99806	0.998708	1.00055	1.00099	1.00053	1.00911	1.01253	1.03312	1.00539	0.99376	0.991468	1.03615	0.995587	1.0137	1.01019	1.00553	1.0132	1.01313	0.997947	0.998583	0.997115	1.00254	1.00494	1.00786	0.999891	1.00331
134	1.01422	1.01922	1.01872	1.01292	1.02004	1.0137	1.01589	0.998209	1.00659	1.03507	1.02497	1.01988	1.02074	1.00739	1.00293	1.00343	1.00009	0.998572	1.0061	1.0054	1.00027	1.00538	0.998179	1.00135	1.0003	1.0033	1.00333	1.0017	1.00979	1.01603	1.03359	1.00805	0.994525	0.994857	1.03534	1.00036	1.01409	1.01212	1.00494	1.01468	1.01653	1.00256	1.00394	0.997539	1.00499	1.00316	1.00496	1.00742	1.00357
135	1.01438	1.01717	1.01477	1.02125	1.01615	1.01243	1.01221	0.995534	1.00483	1.038	1.02563	1.01959	1.02028	1.00246	1.00372	1.00159	0.998774	0.992752	1.00242	1.00647	0.999378	1.00438	0.997251	1.00006	0.999021	1.00418	1.00225	1.00306	1.00955	1.01931	1.02977	1.00099	0.990624	0.991144	1.0394	1.00076	1.01352	1.00938	1.00342	1.00993	1.01407	1.00384	1.00271	0.997544	1.00465	1.00298	1.0029	1.00325	0.999747
136	1.01346	1.02698	1.01214	1.01947	1.01499	1.01418	1.01074	0.998683	1.00223	1.03299	1.02512	1.02223	1.01794	1.00479	1.0043	1.00084	1.00002	0.99354	1.00826	1.00528	1.0004	1.0023	0.998587	1.00138	1.00356	1.00624	1.00426	1.0037	1.00803	1.01575	1.02978	1.00186	0.987572	0.991264	1.04226	1.00378	1.01202	1.01143	1.00314	1.00957	1.01486	1.0022	1.00643	0.999759	1.00532	1.00395	1.00196	1.00463	1.00165
137	1.0095	1.02239	1.01478	1.01421	1.00964	1.00893	1.00461	0.999984	0.999193	1.03245	1.01879	1.0168	1.01396	1.0002	1.00366	0.996824	0.998874	0.989665	1.0043	1.00384	0.998775	1.00107	0.99878	1.0012	1.00299	1.00688	1.00196	1.0023	1.00445	1.01117	1.02707	0.997271	0.983214	0.986219	1.03879	1.00212	1.0113	1.0076	1.00021	1.00549	1.01139	1.00225	1.00949	0.99613	1.00272	1.00723	1.00382	0.999908	0.99872
138	1.00825	1.01966	1.01028	1.00986	1.0174	1.00838	1.00546	0.997913	0.995575	1.02798	1.01647	1.01284	1.01605	0.992448	1.00382	0.995679	0.996091	0.989372	1.00474	1.00405	0.998319	0.998537	0.996415	1.00022	1.00333	1.00406	1.00057	0.998708	1.005	1.00941	1.0268	0.993223	0.980776	0.984644	1.03781	1.00258	1.00901	1.00667	0.997346	1.00404	1.01054	1.00134	1.00665	0.996996	1.00356	1.00421	1.00026	0.998823	0.995894
139	1.01	1.01879	1.00824	1.01055	1.0092	1.00634	1.00402	0.99895	0.996869	1.02941	1.01571	1.01715	1.01138	0.996942	1.00347	0.995662	0.991884	0.986858	1.00858	1.00287	0.998624	0.994995	0.997297	0.999066	1.00364	0.999846	1.00276	0.99821	1.00509	1.00738	1.02451	0.990568	0.979058	0.983283	1.03851	1.0074	1.00766	1.00814	0.998746	1.00352	1.01171	1.00105	1.00963	0.99816	1.00443	1.00899	0.999544	1.00194	0.997658
140	1.00933	1.01623	1.00477	1.00554	1.01197	1.00517	1.00866	1.00115	0.995921	1.0246	1.01598	1.02331	1.01109	0.996927	1.00213	0.995347	0.991032	0.98398	1.00722	0.999766	0.997003	0.994189	0.999217	1.00152	1.00305	0.997622	1.0015	0.998275	1.00587	1.00316	1.02548	0.990183	0.979599	0.983178	1.03796	1.00503	1.00543	1.00469	0.997738	1.00313	1.00879	0.999253	1.01292	0.995512	1.00159	1.00812	0.995776	1.00391	0.997074
141	1.00542	1.01126	1.01339	1.00253	1.00541	1.00149	1.00727	0.995852	0.99327	1.0204	1.01082	1.01942	1.01248	0.993857	1.00206	0.994793	0.990963	0.981741	1.00467	0.996336	0.995761	0.992253	0.997766	0.998641	1.0021	0.99757	0.999586	0.99543	0.999508	1.00203	1.02578	0.980712	0.972519	0.981834	1.03848	1.00217	1.00561	1.00121	0.994771	0.999207	1.00607	0.993851	1.01058	0.992966	0.999557	1.00627	0.995602	1.00087	0.993156
142	1.00915	1.01434	1.01124	0.997878	1.00548	1.00449	1.00623	0.995207	0.992426	1.02728	1.01241	1.01753	1.01051	0.993959	1.00043	0.994393	0.991784	0.982679	1.00323	0.997071	0.997987	0.991387	0.99789	0.998594	1.00325	0.998141	0.998379	0.997165	1.00156	1.00059	1.02534	0.980692	0.976181	0.981234	1.04191	0.996886	1.00573	1.00182	0.995315	1.00062	1.00783	0.997357	1.0077	0.992851	0.999772	1.0114	0.998712	0.998268	0.991043
143	1.01413	1.01239	1.00765	1.01731	1.00324	1.00468	1.00959	0.995778	0.994581	1.02271	1.00986	1.02173	1.01202	0.997478	1.00148	0.991065	0.990894	0.982643	1.00298	0.997744	0.995562	0.989999	0.997053	0.996755	1.00169	0.994214	0.996038	0.993486	1.00103	1.0013	1.02694	0.981704	0.975144	0.980667	1.04301	0.997182	1.0063	0.999773	0.993247	1.00096	1.00637	0.993294	1.00786	0.993195	0.996589	1.009	0.995019	0.996563	0.993883
144	1.00909	1.01279	1.00719	1.01398	1.00345	0.999851	1.00485	0.994017	0.991788	1.02187	1.00907	1.02031	1.01072	0.996557	0.997996	0.989758	0.990134	0.979534	1.0033	0.992158	0.994132	0.988731	0.999931	0.996865	1.00095	0.996313	1.00134	0.992758	1	0.998738	1.02917	0.9771	0.971922	0.982713	1.04592	0.996643	1.00309	0.996892	0.993347	0.998983	1.00497	0.991308	1.00409	0.990656	0.996663	1.00792	0.99656	0.99582	0.990762
145	1.01342	1.0119	1.00977	1.01165	1.00505	1.00487	1.00739	0.990833	0.99302	1.02537	1.00846	1.02346	1.01322	0.992577	0.998764	0.990011	0.9876	0.978527	1.00203	0.993701	0.994896	0.986986	1.00051	0.995468	1.00131	0.990571	0.998637	0.994359	1.00167	0.998946	1.03118	0.975651	0.971989	0.982101	1.04595	0.992427	1.00554	0.998044	0.995155	1.00024	1.00564	0.989914	1.00135	0.99084	0.995803	1.00663	0.992047	0.992998	0.992778
146	1.01562	1.01213	1.01156	1.01175	1.00676	1.00497	1.00837	0.99023	0.993921	1.02659	1.01357	1.02998	1.0174	1.00034	0.996378	0.994297	0.991033	0.980172	1.00587	0.991674	0.995227	0.988055	0.998296	0.99346	0.999234	0.9898	0.997638	0.994871	1.00166	1.00189	1.03328	0.977335	0.974146	0.984973	1.04674	0.995651	1.00472	0.999774	0.996809	1.00175	1.00656	0.993343	1.00107	0.991751	0.996699	1.00826	0.995226	0.993011	0.995904
147	1.01403	1.01117	1.01256	1.01094	1.00871	1.00821	1.00976	0.987516	0.993329	1.03021	1.01442	1.02758	1.01895	0.997241	0.993946	0.991342	0.991578	0.977445	1.00233	0.989903	0.99371	0.98715	0.997179	0.991297	0.999412	0.996617	0.995489	0.992476	1.00121	1.00305	1.03306	0.976679	0.97299	0.986933	1.04988	0.991307	1.00946	0.997289	0.997957	1.0008	1.00548	0.994293	0.997653	0.989075	0.992329	1.00454	0.993011	0.991565	0.993629
[truncated: 54 more columns]

## Sheet: experiment_2
hours	WT_0	WT_1	WT_2	WT_3	WT_4	WT_5	WT_6	WT_7	WT_8	WT_9	WT_10	WT_11	WT_12	WT_13	WT_14	WT_15	WT_16	WT_17	WT_18	WT_19	WT_20	WT_21	WT_22	WT_23	WT_24	WT_25	WT_26	WT_27	WT_28	WT_29	WT_30	WT_31	WT_32	WT_33	WT_34	WT_35	WT_36	WT_37	WT_38	WT_39	WT_40	WT_41	WT_42	WT_43	WT_44	WT_45	WT_46	WT_47	WT_48
1	0.987768	0.995162	0.992492	0.977074	0.98941	0.976302	0.983719	1.00249	0.983884	0.970528	0.964206	0.979881	0.978167	0.962097	0.988769	0.985715	0.983824	0.960421	1.08383	1.05999	1.06541	1.0446	1.05179	1.03056	0.997043	0.972915	1.08544	1.06698	1.06359	1.04252	1.04997	1.04565	0.966085	0.975375	0.966656	0.972141	0.964409	0.969171	0.988149	0.991796	0.964626	1.00369	1.02857	1.02763	1.03636	0.999826	0.987034	0.985863	0.975557
2	0.987655	0.988048	0.989327	0.977733	0.989149	0.98269	0.980532	0.998034	0.987045	0.97526	0.964991	0.978522	0.975872	0.967878	0.989329	0.987241	0.981068	0.950441	1.05098	1.03857	1.04301	1.02391	1.03629	1.01933	0.991808	0.969879	1.05489	1.03423	1.03782	1.02082	1.03312	1.0298	0.967139	0.974935	0.969004	0.974098	0.964229	0.972238	0.989084	0.989743	0.966864	0.999382	1.02003	1.01162	1.0298	0.991033	0.981714	0.98574	0.9762
3	0.986388	0.984846	0.986623	0.978056	0.990075	0.98183	0.982033	0.995787	0.985465	0.977466	0.966946	0.979123	0.976123	0.970447	0.987324	0.98739	0.98011	0.954952	1.03567	1.02071	1.02711	1.01273	1.0201	1.0156	0.990062	0.967157	1.04023	1.01999	1.02227	1.00737	1.02213	1.0258	0.964966	0.975741	0.965581	0.969117	0.967689	0.968971	0.989468	0.983494	0.969473	0.996584	1.01433	1.00376	1.01931	0.98955	0.983392	0.981604	0.973335
4	0.987996	0.984824	0.984031	0.983637	0.995145	0.987454	0.982656	0.993458	0.987163	0.983231	0.972114	0.985222	0.983334	0.977982	0.988974	0.991724	0.987252	0.970079	1.03193	1.01512	1.02196	1.00558	1.02059	1.01233	0.995669	0.969796	1.03583	1.01562	1.01989	1.00868	1.02092	1.02968	0.969779	0.982164	0.97193	0.97601	0.973551	0.975964	0.991875	0.986104	0.977289	0.995089	1.0092	1.00419	1.01643	0.993037	0.986039	0.982907	0.978564
5	0.988981	0.987651	0.984666	0.984996	0.997618	0.994485	0.98755	0.995489	0.992435	0.988581	0.975758	0.987419	0.987602	0.980713	0.992162	0.995342	0.991076	0.973883	1.02844	1.01444	1.01859	1.00562	1.01813	1.01218	0.996973	0.977519	1.03355	1.01045	1.01972	1.0097	1.01878	1.03116	0.975707	0.988869	0.975075	0.981879	0.97785	0.984839	0.993772	0.988648	0.984425	1.00019	1.00868	1.00628	1.01458	0.996448	0.991343	0.985124	0.98358
6	0.992417	0.991021	0.988043	0.98967	1.00208	0.999291	0.991639	0.998537	0.994113	0.991747	0.981564	0.990514	0.991395	0.988886	0.994572	0.996303	0.995201	0.98477	1.02976	1.01512	1.01905	1.00733	1.02113	1.01784	1.0041	0.984178	1.03006	1.01446	1.01615	1.00822	1.01915	1.03106	0.981368	0.997015	0.984869	0.983604	0.985752	0.98788	0.995872	0.992437	0.990434	0.99953	1.01091	1.01071	1.01132	1.00135	0.996087	0.987135	0.990045
7	0.994373	0.994038	0.990765	0.992485	1.00437	1.00314	0.997559	0.99937	1.00016	0.99818	0.984306	0.994705	0.993766	0.992589	0.995955	1.00108	0.99751	0.994891	1.0249	1.01746	1.01966	1.00901	1.01802	1.01684	1.00568	0.988155	1.02656	1.01084	1.01462	1.00752	1.01895	1.02801	0.98644	1.00306	0.990256	0.990272	0.991042	0.993988	0.997587	0.996079	0.996252	0.999381	1.01052	1.00759	1.0142	1.00208	1.00148	0.99334	0.995523
8	0.99796	0.996185	0.993844	0.994312	1.011	1.00985	1.00166	1.00362	1.00165	1.00478	0.990447	0.998139	0.998698	0.999026	1.00117	1.00117	1.00412	0.997581	1.02714	1.01832	1.02164	1.00619	1.0216	1.01595	1.01689	0.999861	1.02485	1.01246	1.01278	1.00827	1.01814	1.02643	0.992952	1.01056	0.999267	1.00018	0.999171	0.998721	1.00106	0.997697	1.0013	1.00486	1.01332	1.01457	1.01511	1.00843	1.01037	0.997248	1.00388
9	1.00022	0.998802	0.995318	1.00195	1.01151	1.01426	1.00316	1.00539	1.00743	1.00723	0.995429	1.00343	1.00138	1.00097	1.001	1.0061	1.00568	1.008	1.02719	1.01761	1.02378	1.01074	1.02059	1.01916	1.02027	1.00937	1.02261	1.01256	1.0129	1.00645	1.01978	1.02981	0.994828	1.01184	1.00372	1.00442	1.00445	1.00412	1.00162	1.00088	1.00457	1.00532	1.01645	1.01285	1.01249	1.00866	1.01597	0.997788	1.00392
10	1.00255	1.00289	0.996719	1.00124	1.01191	1.01365	1.00456	1.00613	1.01041	1.0083	0.995995	1.00237	1.00511	1.00317	1.004	1.006	1.00809	1.01486	1.02231	1.01791	1.02238	1.00432	1.02008	1.01812	1.01533	1.0078	1.02153	1.01285	1.0112	1.00698	1.01679	1.02714	0.998544	1.0174	1.00711	1.00912	1.00906	1.00415	1.00428	1.00323	1.0126	1.00578	1.01444	1.011	1.01482	1.00902	1.02009	1.00238	1.01034
11	1.00159	1.00549	0.99984	1.0036	1.01144	1.01791	1.00693	1.00621	1.00865	1.00991	0.996913	1.00556	1.00671	1.00326	1.00674	1.00941	1.01224	1.00934	1.01769	1.01605	1.02005	1.00728	1.01833	1.01754	1.02174	1.01265	1.01755	1.00986	1.01088	1.00726	1.01572	1.02606	1.00313	1.02258	1.01118	1.01396	1.0127	1.00836	1.00819	1.00317	1.01476	1.00895	1.01641	1.00969	1.01177	1.00977	1.01864	1.00334	1.01354
12	1.00227	1.0017	0.99965	1.00429	1.01119	1.01312	1.00751	1.00574	1.00995	1.00922	0.996688	1.00589	1.00597	1.00569	1.00609	1.00926	1.01115	1.00418	1.01003	1.01078	1.01878	1.00595	1.01551	1.01158	1.01686	1.00927	1.01019	1.0081	1.00752	1.00471	1.00935	1.02047	1.00117	1.01556	1.00754	1.01107	1.01012	1.00878	1.00563	1.00372	1.01107	1.00777	1.01281	1.00552	1.01062	1.00753	1.01713	1.00219	1.01083
13	1.00122	1.00219	0.999501	1.00266	1.00983	1.01408	1.00694	1.00317	1.00822	1.00865	0.995476	1.00509	1.0054	1.00358	1.0047	1.00816	1.00999	1.0011	1.00618	1.00727	1.01592	1.00316	1.01102	1.01058	1.0118	1.00867	1.00653	1.00424	1.0057	1.00133	1.00531	1.01689	0.99986	1.01507	1.00554	1.00971	1.00788	1.00735	1.00452	1.00269	1.0096	1.00553	1.01034	1.00197	1.01056	1.00753	1.01702	1.00314	1.01167
14	1.00116	1.00265	0.999036	1.00462	1.00847	1.01155	1.00628	1.00466	1.00698	1.00721	0.996317	1.00315	1.00624	1.00418	1.00309	1.01014	1.00815	1.00079	1.00304	1.00646	1.01307	1.00003	1.00831	1.01117	1.01199	1.00709	1.00386	1.00243	1.00414	1.00045	1.00359	1.01659	1.0013	1.01394	1.00538	1.0079	1.00585	1.00546	1.00638	1.00245	1.0075	1.00269	1.00749	1.00359	1.00697	1.00709	1.01669	1.00154	1.00966
15	1.00211	1.00252	0.998142	1.00424	1.00718	1.01002	1.00472	1.00281	1.00735	1.00388	0.998302	1.00371	1.00641	1.0043	1.00599	1.00609	1.006	0.999371	1.00124	1.00408	1.01173	1.00101	1.00338	1.00819	1.00684	1.00553	1.00112	1.00224	1.00429	0.996941	1.00168	1.01454	1.00006	1.01096	1.00686	1.01135	1.00458	1.00316	1.00145	1.0005	1.00646	1.00359	1.00853	1.0003	1.00751	1.00758	1.01279	1.00174	1.00873
16	0.998998	1.00134	0.995003	1.00053	1.00267	1.00871	1.00338	1.00201	1.00351	1.00621	0.995618	1.00221	1.00257	1.00257	1.00107	1.00352	1.00297	0.993662	0.994931	0.996919	1.00683	0.998524	1.00144	1.00504	1.01063	1.00476	0.995352	0.998148	1.00257	0.994286	0.999671	1.0094	0.995714	1.01154	0.99924	1.00655	1.0029	1.00083	1.00206	0.999661	1.00269	1.00184	1.00326	0.998339	1.00277	1.00418	1.01022	1.00073	1.00608
17	0.997883	0.999243	0.996663	1.00256	1.00062	1.006	0.998643	0.997816	1.00405	1.00005	0.994734	1.00107	1.00166	1.00132	0.998309	1.00231	1.00163	1.00021	0.991678	0.995472	1.00391	0.995118	0.997514	1.00151	1.01038	1.00228	0.99241	0.992973	0.999941	0.991553	0.99695	1.0041	0.996369	1.00782	0.999037	1.00637	1.00077	0.999921	0.999601	0.99687	1.00084	1.00066	0.999935	0.993068	1.00177	0.999235	1.01182	0.99693	1.00406
18	0.997265	0.997233	0.99599	1.00371	1.00405	1.00648	1.0014	0.998785	1.00377	1.00395	0.997225	1.00313	1.00369	0.999746	1.00151	1.0038	1.00325	1.00058	0.992754	0.995778	1.00278	0.99575	0.997452	1.00015	1.00383	1.00599	0.989735	0.993715	0.998925	0.990244	0.996737	1.00648	0.997206	1.01012	1.00222	1.00447	1.00473	1.00236	1.00032	1.00066	0.999808	1.00088	0.999518	0.997182	0.998786	1.00227	1.01067	0.998937	1.00747
19	0.99858	0.997498	0.994658	1.00251	1.00338	1.00242	0.998307	0.995636	1.00134	1.00363	0.996553	0.999277	1.00051	1.00198	1.0021	1.00163	1.00103	1.00085	0.98776	0.992394	1.00043	0.991997	0.993754	0.99796	1.00409	1.00247	0.987131	0.992405	0.998353	0.988448	0.991497	1.0024	0.995425	1.00782	1.00311	1.00328	1.00413	0.999802	1.00137	0.998252	0.998471	0.999781	0.998873	0.99594	1.00033	0.999133	1.00996	0.998498	1.0048
20	1.00048	0.996753	0.992651	1.00045	1.00281	1.00143	0.996319	0.994823	1.00164	1.00339	0.996758	0.997773	0.998562	1.00021	1.00307	1.00328	0.999344	0.998822	0.983035	0.9919	0.999742	0.992262	0.991641	0.996955	1.00399	1.00016	0.984512	0.990932	0.997329	0.984937	0.987978	0.998594	0.99593	1.01234	1.00357	1.0014	1.00113	0.998439	0.998413	0.997088	0.999125	0.998715	0.994424	0.99543	0.997925	0.999072	1.00777	0.998245	1.00267
21	0.998076	0.994867	0.994159	0.999621	0.999995	1.00052	0.998957	0.99202	1.00104	0.999975	0.996294	1.0008	1.00092	0.996795	1.00252	1.00191	0.999696	0.997537	0.983321	0.98899	0.998352	0.991415	0.988308	0.994374	1.00017	0.999516	0.983846	0.988207	0.995252	0.985437	0.987845	0.996839	0.994519	1.00555	0.998134	1.00592	1.00432	0.995711	0.999379	0.996371	1.00047	0.998147	0.992655	0.991011	0.996423	0.996755	1.00817	0.994351	1.0052
22	0.993289	0.992481	0.992802	0.998945	0.999021	0.996581	0.991858	0.990025	0.996483	0.997357	0.992233	0.995774	0.99591	0.995251	1.00104	1.0007	0.995665	0.98931	0.979382	0.984745	0.994303	0.986967	0.985726	0.992701	0.994905	0.992869	0.978363	0.983893	0.991567	0.980384	0.987831	0.990002	0.993341	1.00025	0.994528	1.00022	0.999314	0.993649	0.997282	0.993003	0.9916	0.995374	0.988332	0.989224	0.991805	0.995293	1.00333	0.992501	0.999997
23	0.995833	0.989171	0.991875	0.997612	0.998023	0.993978	0.991262	0.988998	0.998503	0.994529	0.99267	0.992629	0.996296	0.994017	1.00027	0.999485	0.996738	0.991538	0.979184	0.984428	0.991725	0.983268	0.984439	0.989114	0.991879	0.99332	0.975099	0.980798	0.987929	0.977762	0.98456	0.987368	0.991651	0.999104	0.993346	0.998728	0.996711	0.991121	0.996003	0.993267	0.991007	0.993989	0.987329	0.990522	0.992172	0.991835	1.00185	0.991962	0.99683
24	0.994875	0.99208	0.993681	0.997683	0.998449	0.993921	0.991549	0.990774	0.9984	0.998001	0.993387	0.992863	0.997039	0.993365	1.0002	0.999186	0.993942	0.99017	0.975274	0.980952	0.991771	0.985998	0.98416	0.987075	0.989899	0.991232	0.97212	0.980539	0.988984	0.978548	0.982494	0.987513	0.990296	0.99664	0.99369	0.997221	0.99492	0.993645	0.996533	0.995034	0.988525	0.991985	0.987632	0.988249	0.990864	0.990064	0.998384	0.993414	0.996158
25	0.99487	0.9909	0.990786	0.996291	0.994455	0.990516	0.98869	0.98819	0.998351	0.992009	0.991149	0.990364	0.994619	0.991336	1.00147	0.99228	0.993575	0.985534	0.974302	0.981792	0.992002	0.983447	0.983244	0.985207	0.988114	0.988353	0.973751	0.975809	0.988398	0.975912	0.983425	0.984882	0.988496	0.99487	0.989794	0.993951	0.994301	0.992025	0.993936	0.993996	0.986492	0.993881	0.987166	0.989018	0.988104	0.988826	0.996237	0.991587	0.992374
26	0.995202	0.991038	0.992263	0.995719	0.994358	0.987282	0.987882	0.987365	0.996527	0.992669	0.993371	0.991825	0.997452	0.989387	0.997013	0.995411	0.991144	0.98416	0.977191	0.983536	0.99051	0.982232	0.97981	0.98606	0.982541	0.984651	0.971405	0.979491	0.987451	0.977137	0.983915	0.983398	0.988634	0.990553	0.988647	0.993489	0.994494	0.992943	0.99382	0.991074	0.987656	0.99169	0.985074	0.991041	0.98756	0.988828	0.992311	0.990717	0.993493
27	0.996321	0.992275	0.99346	0.99595	0.995254	0.985327	0.989346	0.988334	0.993624	0.993192	0.992244	0.992168	0.996631	0.991631	0.997108	0.993095	0.992053	0.98352	0.978061	0.989833	0.989975	0.98522	0.98143	0.9876	0.988622	0.987483	0.971772	0.983305	0.988419	0.977936	0.987446	0.981034	0.988981	0.987467	0.986656	0.991226	0.991679	0.9902	0.992335	0.994488	0.987277	0.992039	0.987271	0.988911	0.988496	0.989802	0.992348	0.995362	0.993187
28	0.998079	0.993385	0.995052	0.997931	0.995674	0.986505	0.992623	0.990727	0.998093	0.995087	0.995204	0.994563	1.00013	0.991584	0.9975	0.996802	0.991663	0.984081	0.981054	0.990526	0.9943	0.986318	0.985945	0.989706	0.986628	0.981544	0.973503	0.985896	0.988919	0.979598	0.987607	0.983654	0.990788	0.98699	0.987411	0.988533	0.989834	0.992534	0.990997	0.994204	0.986986	0.995177	0.988625	0.992636	0.989366	0.990209	0.990731	0.994262	0.992165
29	0.99905	0.997287	0.998983	1.00274	0.997618	0.988667	0.999942	0.995534	0.998983	0.995876	0.998401	0.998634	1.00344	0.999247	1.00098	0.994042	0.992732	0.994099	0.982581	0.994755	0.997771	0.990689	0.99288	0.993963	0.990201	0.988402	0.982222	0.991362	0.992301	0.985255	0.992359	0.986669	0.994196	0.988151	0.993928	0.991396	0.991115	0.994242	0.993458	0.999169	0.993662	1.00013	0.992357	0.996931	0.992963	0.994729	0.989711	1.00009	0.993308
30	1.00106	1.00182	1.00124	1.00316	0.99832	0.989588	0.998168	0.997554	0.999798	0.993432	1.0039	1.00186	1.00755	1.00436	1.00022	0.994982	0.992562	0.992862	0.991812	0.996996	0.995921	0.991808	0.995538	0.99631	0.989753	0.986516	0.984204	0.99733	0.991252	0.989561	0.997237	0.989126	0.993772	0.990164	0.99539	0.995364	0.999175	0.996211	0.996233	1.00136	0.994886	0.999883	0.994057	0.996918	0.991528	0.995947	0.98989	1.00303	0.991726
31	1.00471	1.00626	1.00437	1.00948	0.998548	0.99526	1.00767	1.00152	1.00128	0.995757	1.0121	1.00325	1.00938	1.00611	1.00226	0.995973	0.993102	1.00721	0.99242	0.998762	0.996126	0.996578	0.998621	0.99941	0.99485	0.991126	0.985576	1.00305	0.992315	0.994719	1.00023	0.990154	0.995328	0.993668	1.00287	1.00232	1.00181	1.00006	0.997515	1.00587	0.99777	1.00395	0.995507	0.999398	0.995739	1.00054	0.993124	1.00758	0.994088
32	1.0076	1.00987	1.00936	1.00887	1.00275	0.997751	1.00833	1.00656	1.00268	1.00111	1.01374	1.00716	1.01378	1.01527	1.00375	0.998079	0.998426	1.01112	0.99491	1.00453	1.00183	1.0026	0.999782	1.00198	0.998387	0.998446	0.990767	1.00756	0.996222	0.996199	1.00454	0.996915	1.00381	0.999301	1.01102	1.00866	1.0061	1.00031	1.00081	1.0054	1.00574	1.00667	0.999788	1.0067	0.995504	1.00668	0.996621	1.01154	1.00132
33	1.00922	1.01049	1.01289	1.01154	1.00451	1.00854	1.01324	1.0054	1.00397	0.999332	1.015	1.01094	1.01546	1.01748	1.00579	1.00108	1.00261	1.01914	1.00154	1.00728	1.00167	1.00475	1.00091	1.00627	1.00591	1.00608	0.995597	1.01127	0.997831	1.00264	1.00661	1.00031	1.00835	1.00966	1.01894	1.01758	1.0153	1.00522	1.00575	1.01122	1.0088	1.0087	1.00266	1.00424	0.995528	1.01034	0.999276	1.01175	0.999881
34	1.01006	1.01286	1.01115	1.01178	1.0078	1.00817	1.01377	1.00899	1.00525	1.00823	1.022	1.01225	1.01544	1.02185	1.01042	1.00335	1.00694	1.02541	1.00285	1.00874	1.00184	1.00803	1.00219	1.00863	1.01034	1.01437	0.997398	1.01181	0.997741	1.00565	1.00892	0.997377	1.01454	1.01253	1.02201	1.02496	1.02037	1.00913	1.01121	1.00946	1.01675	1.01212	1.00353	1.00945	0.995786	1.00695	1.00767	1.01639	1.00755
35	1.0122	1.01408	1.0144	1.01221	1.00666	1.01465	1.01821	1.00796	1.00894	1.01123	1.01678	1.01303	1.01593	1.02515	1.01399	1.00565	1.01123	1.02476	1.003	1.01003	1.00665	1.00776	1.00334	1.00694	1.01013	1.01989	1.00097	1.01278	0.99689	1.00927	1.00623	0.999074	1.01886	1.01969	1.02664	1.03003	1.02888	1.01521	1.01167	1.01259	1.01847	1.0105	1.00678	1.00459	0.995055	1.00797	1.00776	1.01798	1.01468
36	1.00618	1.01148	1.01007	1.01364	1.00672	1.01382	1.01304	1.00553	1.00692	1.01176	1.0151	1.01287	1.0125	1.01971	1.01498	1.00565	1.01202	1.02397	0.997572	1.00564	1.0061	1.0023	0.999382	1.00518	1.00552	1.01862	0.993	1.0054	0.994079	1.0062	1.00173	0.994003	1.01704	1.01666	1.02513	1.02219	1.02592	1.00633	1.0147	1.00771	1.0173	1.00808	0.998117	1.00083	0.994692	1.00692	1.00896	1.01437	1.0095
37	1.00753	1.01073	1.01057	1.00675	1.00661	1.0137	1.01184	1.00507	1.00751	1.01206	1.0124	1.00817	1.00771	1.01577	1.01473	1.00482	1.00992	1.01768	0.99528	1.00219	0.999362	0.999501	0.995576	1.00069	1.00279	1.01779	0.992962	1.00312	0.991145	1.00516	0.998592	0.988806	1.01686	1.01359	1.01781	1.02202	1.02141	1.00254	1.0165	1.00759	1.01694	1.0034	0.999819	1.00067	0.994171	1.00377	1.00708	1.01093	1.01132
38	1.0056	1.00716	1.00642	1.00501	1.00468	1.00998	1.00694	1.00204	1.00743	1.00977	1.00779	1.006	1.00369	1.01279	1.01029	1.00665	1.00812	1.00933	0.989575	0.996698	0.995462	0.998635	0.990922	0.997259	0.998518	1.01205	0.987153	1.0014	0.986856	1.00431	0.99308	0.985217	1.01128	1.00583	1.0125	1.01385	1.02003	1.00783	1.01025	1.00267	1.01371	0.99945	0.994055	0.992556	0.991611	1.00018	1.00021	1.01038	1.01078
39	1.00477	1.00657	1.00641	1.00622	1.00194	1.01194	1.00502	1.00156	1.00744	1.00815	1.00677	1.00555	1.00348	1.01113	1.00807	1.00454	1.00957	1.01006	0.991087	0.994076	0.995435	0.995199	0.993796	0.993703	0.998319	1.01438	0.988885	1.00171	0.984497	1.00072	0.993188	0.986314	1.01541	1.00641	1.01634	1.01283	1.01321	1.00291	1.01167	1.001	1.01263	0.998025	0.996234	0.99869	0.990604	1.00631	1.00347	1.00815	1.00708
40	1.00168	1.00484	1.00569	1.00484	0.999424	1.00779	1.00525	1.00129	1.00627	1.00767	1.00671	1.00451	0.999392	1.01003	1.00766	1.00379	1.0049	1.0083	0.988579	0.994681	0.992535	0.99285	0.991906	0.993291	0.997894	1.01278	0.987795	0.997809	0.980292	1.00033	0.990441	0.98627	1.01288	1.00363	1.01081	1.00739	1.01521	1.00243	1.00414	1.00098	1.01095	0.99346	0.993158	0.990808	0.992563	1.0033	1.00158	1.00693	1.00865
41	0.998899	1.00267	1.00441	1.00234	0.999792	1.0077	1.00407	0.999011	1.00283	1.00678	1.00359	1.00116	1.00184	1.00895	1.00493	1.00131	1.0043	1.00405	0.987966	0.990112	0.990746	0.992056	0.989493	0.99172	0.993968	1.01454	0.987174	0.997584	0.983311	0.99955	0.989773	0.985314	1.01381	1.00152	1.01563	1.01054	1.01515	1.00272	1.01002	0.999699	1.01238	0.994061	0.992802	0.993342	0.992385	1.00345	1.00184	1.0062	1.00588
42	1.00191	1.00184	1.00359	0.999937	0.998755	1.00847	1.00322	0.998356	1.00087	1.00407	1.00463	0.999936	0.998868	1.00961	1.00584	1.0004	1.00304	1.00887	0.985879	0.984612	0.989978	0.989864	0.986026	0.99115	0.996349	1.01358	0.988346	0.99499	0.983841	0.99661	0.987401	0.983082	1.0133	1.00121	1.01169	1.00508	1.0098	1.00351	1.00718	0.996532	1.00942	0.991382	0.990829	0.994052	0.988977	1.00094	0.998624	1.00299	1.00966
43	0.997683	0.998766	1.0004	1.00038	0.997181	1.0005	0.998439	0.995682	1.0007	1.00123	1.00142	0.996527	0.996725	1.00155	1.00179	1.00381	0.999879	1.00111	0.977696	0.982132	0.985344	0.986402	0.985586	0.986768	0.991697	1.00962	0.98403	0.988184	0.979294	0.991483	0.983859	0.979055	1.00855	0.996758	1.00891	1.00018	1.00864	0.998106	1.00027	0.993376	1.00395	0.987531	0.988752	0.987538	0.986905	0.993983	0.993391	1.00033	1.00275
44	0.999843	0.997087	1.00261	1.0019	0.997899	1.00301	0.999802	0.997329	1.00109	1.0034	1.00422	0.99499	0.996439	1.00483	0.997895	0.999981	1.00064	1.00628	0.978121	0.984596	0.984255	0.987862	0.984188	0.988947	0.99466	1.01015	0.983375	0.9901	0.980689	0.988803	0.986443	0.979428	1.00729	0.997582	1.00848	1.00573	1.00605	1.00295	1.00219	0.996612	1.00533	0.990261	0.98716	0.987375	0.989438	0.992837	0.99671	1.00223	1.00146
45	0.994834	0.995371	0.998989	0.999961	0.996018	0.999106	0.995296	0.994156	0.999276	1.00046	0.99885	0.995271	0.996112	1.00112	0.999034	0.998808	1.00043	1.00371	0.979586	0.983827	0.981144	0.983698	0.981401	0.984666	0.991011	1.00393	0.981154	0.986509	0.979132	0.986665	0.981717	0.976439	1.00684	0.995406	1.0054	1.00015	1.00405	0.999487	1.0009	0.994753	1.00002	0.98768	0.985055	0.987985	0.985356	0.989057	0.991572	1.00073	1.0006
46	0.996105	0.992285	0.997413	0.996601	0.994766	1.00053	0.993096	0.991691	0.996598	0.999463	1.00133	0.993919	0.996059	1.00174	0.995314	0.994209	0.998759	1.00875	0.975741	0.982141	0.977785	0.983785	0.984717	0.984685	0.992434	1.00419	0.978776	0.986555	0.980461	0.984636	0.980526	0.972493	1.00577	0.991364	1.00325	0.998056	0.997173	0.999488	1.00007	0.993846	1.0022	0.986858	0.984904	0.989982	0.985525	0.988572	0.992387	1.00205	0.996667
47	0.99373	0.994169	0.996617	0.995163	0.993287	0.99333	0.993756	0.991134	0.995547	0.99332	0.997347	0.992297	0.993304	0.997966	0.997048	0.996869	0.996277	1.00087	0.972793	0.979548	0.976137	0.98449	0.982193	0.979196	0.985852	0.998766	0.977584	0.983477	0.98003	0.986054	0.980751	0.972175	1.00362	0.988175	1.0005	0.994214	0.994201	0.99813	0.998583	0.993627	0.999856	0.987061	0.984418	0.985811	0.98478	0.986949	0.989513	0.995805	0.99618
48	0.995839	0.991978	0.996337	0.997888	0.995466	0.992086	0.991629	0.992743	0.998221	0.994429	0.998098	0.992792	0.994728	0.99674	0.994733	0.994182	0.993548	1.00716	0.973554	0.977523	0.973883	0.986533	0.984645	0.980853	0.988514	0.997564	0.97561	0.986259	0.979877	0.983071	0.978711	0.972383	1.00381	0.985778	0.998387	0.993743	0.991472	0.999587	0.997722	0.994225	0.999012	0.987759	0.981805	0.989059	0.987756	0.985299	0.988898	0.994029	0.994542
49	0.992999	0.995646	0.998939	0.993083	0.992996	0.993577	0.992989	0.991584	0.994712	0.99106	0.99775	0.99699	0.992789	0.997081	0.996255	0.997047	0.992605	1.00282	0.97085	0.981527	0.974347	0.986206	0.982055	0.97924	0.983797	0.995701	0.974068	0.980915	0.982583	0.982793	0.979116	0.972287	1.00046	0.982923	0.993729	0.992729	0.992571	0.99849	0.996609	0.993213	0.994816	0.989206	0.983402	0.989267	0.984252	0.988541	0.987373	0.996834	0.990069
50	0.998118	0.994047	1.00061	0.996606	0.991214	0.986584	0.992769	0.992606	0.992401	0.994436	0.998281	0.998733	0.993415	0.995087	0.995104	0.992851	0.990818	1.00366	0.973683	0.985151	0.975717	0.989288	0.984648	0.981605	0.987154	0.991599	0.977113	0.979981	0.986128	0.986407	0.979715	0.972068	0.998165	0.983658	0.992794	0.988692	0.991912	0.999929	0.994544	0.99536	0.99962	0.99094	0.985308	0.991946	0.986077	0.9879	0.987249	0.995236	0.990019
51	1.00203	0.998123	1.00132	0.995893	0.991604	0.985648	0.995728	0.994711	0.995163	0.988557	0.999259	0.998999	0.993799	0.999958	0.995417	0.996031	0.994743	1.00573	0.975303	0.986697	0.973211	0.98992	0.987103	0.98313	0.987879	0.993829	0.980739	0.9823	0.987087	0.990703	0.985478	0.976163	1.00124	0.97998	0.988595	0.985424	0.989565	0.998844	0.995943	0.998252	0.999367	0.994988	0.987776	0.990877	0.987259	0.991178	0.986904	0.998335	0.991593
52	0.998933	0.999556	1.0023	0.997674	0.990098	0.985564	0.997369	0.997325	0.992843	0.989478	1.00213	1.00062	0.998903	0.99784	0.992733	0.994705	0.993816	1.0088	0.984292	0.991614	0.975486	0.995793	0.988502	0.986067	0.983641	0.989115	0.983257	0.985669	0.992311	0.992745	0.991285	0.975211	0.99987	0.977801	0.989134	0.984276	0.990063	0.997895	0.991571	0.999302	0.998483	0.996202	0.990983	0.996993	0.992312	0.995864	0.984696	0.998805	0.989065
53	1.0043	1.00481	1.00711	0.998499	0.993431	0.983621	1.00384	1.00055	0.993298	0.988721	1.00438	1.00567	0.999566	1.00364	0.992956	0.996524	0.993193	1.00719	0.990084	0.995079	0.977854	0.998139	0.99438	0.991872	0.989085	0.991227	0.988454	0.989571	0.996046	0.997082	0.994678	0.98093	1.00061	0.980389	0.991978	0.984206	0.996591	0.998632	0.993578	1.00237	1.00256	0.999564	0.993338	0.998092	0.990949	0.997069	0.986749	1.00405	0.988172
54	1.00779	1.00955	1.00905	1.00349	0.994028	0.989894	1.00888	1.00686	0.994549	0.992451	1.01181	1.00411	1.00382	1.01072	0.995833	0.996229	0.997076	1.01785	1.00053	1.00328	0.981251	1.0032	0.998316	0.994313	0.997815	0.992937	0.997658	0.993795	0.998996	1.00166	1.00051	0.986754	1.00506	0.984852	0.997862	0.991823	0.99767	1.00343	0.994943	1.01242	1.00932	1.00431	0.997213	1.00614	0.99538	1.00226	0.988761	1.00629	0.991199
55	1.00795	1.01101	1.01297	1.0059	0.996698	0.989374	1.01122	1.00988	0.995847	0.991725	1.01473	1.00619	1.00466	1.01008	0.99462	0.996619	0.994955	1.01711	1.00402	1.00479	0.986305	1.01	1.00044	0.999661	0.995477	0.995301	1.00383	0.994275	1.00022	1.00822	1.00386	0.989175	1.00471	0.990248	1.00413	0.996432	1.00391	1.00473	0.995081	1.01113	1.00933	1.00581	1.00033	1.00242	0.998299	1.00647	0.992962	1.01078	0.992726
56	1.00965	1.01418	1.01719	1.01024	0.996055	0.993376	1.0143	1.01271	0.995895	0.995696	1.01863	1.01033	1.00838	1.01856	0.99936	0.996028	0.999581	1.02372	1.00739	1.01071	0.987832	1.01267	1.00167	1.00236	1.00005	1.00008	1.00582	0.99963	0.999973	1.01118	1.00702	0.992741	1.00725	0.99593	1.0107	1.00526	1.00556	1.00898	0.997064	1.01727	1.0159	1.01245	1.00513	1.00882	0.998777	1.0079	0.994009	1.00929	0.994971
57	1.01279	1.01526	1.01634	1.0112	0.998989	0.997332	1.01634	1.01229	1.00062	1.00116	1.02147	1.01231	1.00905	1.0155	0.999651	0.999199	1.00275	1.02473	1.00974	1.00963	0.988955	1.0131	1.00034	1.00401	1.00137	1.00813	1.01511	1.00548	1.00584	1.01554	1.0102	0.997315	1.00933	1.00305	1.0159	1.00758	1.00987	1.01718	0.999638	1.01469	1.01726	1.01211	1.0041	1.00581	1.00019	1.01133	0.998682	1.01236	0.999262
58	1.00961	1.01376	1.01863	1.00943	1.00092	1.00388	1.01688	1.01321	1.00084	1.00639	1.02332	1.01503	1.00996	1.018	1.00142	0.999552	1.00499	1.02743	1.00956	1.00987	0.987107	1.01283	1.00447	1.0066	1.00484	1.01326	1.01909	1.00528	1.00472	1.01784	1.01046	0.999239	1.01376	1.00425	1.01886	1.00606	1.01885	1.01327	1.00591	1.01949	1.02271	1.01166	1.00569	1.01083	1.00238	1.01243	0.999022	1.01283	1.00138
59	1.01125	1.01545	1.01684	1.0135	1.00371	1.00856	1.0158	1.01471	1.00059	1.01181	1.02639	1.01461	1.01161	1.0161	1.00651	1.00453	1.01224	1.03612	1.00924	1.01094	0.991379	1.01613	1.00647	1.00739	1.00987	1.01783	1.02006	1.0057	1.00387	1.01889	1.00886	1.00041	1.01956	1.01338	1.02425	1.01424	1.02214	1.01929	1.00831	1.01882	1.01692	1.01523	1.00749	1.0059	1.00244	1.01306	1.00585	1.01409	1.00807
60	1.00946	1.01377	1.01544	1.01287	1.00343	1.00827	1.01443	1.01182	0.999875	1.00584	1.02587	1.01154	1.01095	1.01262	1.00391	1.00498	1.00885	1.02861	1.00655	1.00375	0.990182	1.01206	1.00233	1.00166	1.00548	1.02144	1.0166	1.00061	1.0038	1.01787	1.00632	0.997112	1.01703	1.01221	1.01883	1.01101	1.0176	1.01921	1.00797	1.01165	1.01873	1.01402	1.00684	1.0082	1.00084	1.01361	1.00643	1.00736	1.00883
61	1.00819	1.01147	1.01469	1.01098	1.00357	1.00977	1.01335	1.00766	1.00203	1.00789	1.02661	1.01098	1.00974	1.01243	1.00737	1.00801	1.01165	1.02712	1.00497	1.00183	0.991046	1.01195	1.00507	0.999024	1.00696	1.0254	1.0109	0.999958	1.00642	1.0145	1.00469	0.997108	1.02232	1.01156	1.01753	1.01238	1.01943	1.02241	1.00888	1.01591	1.0195	1.00851	1.00474	1.00083	1.00111	1.00769	1.01099	1.00872	1.01373
62	1.00674	1.01134	1.01241	1.01075	1.00267	1.00966	1.01184	1.00469	1.00433	1.00965	1.02558	1.01125	1.00851	1.01044	1.01088	1.00672	1.01196	1.02604	0.999011	0.998103	0.986922	1.00745	1.00124	0.996299	1.00291	1.02287	1.00835	0.995903	0.99914	1.01441	0.999982	0.994847	1.02309	1.01238	1.0152	1.01114	1.01905	1.02099	1.00761	1.00929	1.01753	1.01004	1.00142	0.99974	0.997895	1.0079	1.00866	1.00544	1.01325
63	1.00642	1.00671	1.00881	1.00925	1.00422	1.00614	1.00882	1.00424	1.00245	1.01016	1.01891	1.00837	1.00444	1.00806	1.0049	1.00567	1.0083	1.02644	1.00007	0.99867	0.98696	1.00557	0.998892	0.993997	1.00161	1.02168	1.00056	0.991831	0.999435	1.01159	0.99373	0.992735	1.02234	1.00851	1.00673	1.0022	1.01511	1.0169	1.00532	1.00838	1.00938	1.00341	0.997598	0.999321	0.997099	1.00677	1.00958	1.00522	1.01009
64	1.00463	1.00739	1.00391	1.00629	1.0022	1.00738	1.00679	1.00167	1.00304	1.00729	1.01537	1.00627	1.00318	1.00328	1.00259	1.00473	1.0104	1.01636	0.99644	0.993222	0.980211	0.999421	0.996229	0.992233	0.996727	1.01382	0.998746	0.999671	0.993802	1.00718	0.993492	0.993637	1.02181	1.00648	1.01127	1.0026	1.00897	1.0129	1.00244	1.00535	1.00568	1.00033	0.99513	0.996287	0.997921	1.00256	1.00668	1.00347	1.00865
65	1.00202	1.00662	1.00691	1.00487	1.00101	1.00426	1.0035	1.00118	1.0005	1.00992	1.01648	1.00785	1.00198	1.00372	1.0007	1.00517	1.01206	1.01959	0.996425	0.995908	0.985321	1.00068	0.99432	0.987946	0.999108	1.01272	0.998238	1.00006	0.999682	1.01097	0.991432	0.992015	1.02033	1.00703	1.00924	1.00023	1.0109	1.01542	1.00306	1.00442	1.01082	1.00005	0.99135	0.9955	0.994203	1.00377	1.00463	1.00404	1.00935
66	1.00298	1.00246	1.00235	1.00385	1.00132	1.00599	1.00301	0.99957	1.00265	1.00947	1.01994	1.00523	1.00523	1.0025	1.0018	1.00608	1.00782	1.01911	0.990366	0.991741	0.981966	0.998679	0.991541	0.990194	1.00402	1.01604	0.998399	0.997877	0.997672	1.00767	0.991096	0.989218	1.02036	1.00198	1.00705	0.998457	1.00637	1.00865	1.00322	1.00375	1.00859	0.997461	0.99479	0.995573	0.994942	1.00101	1.00338	1.003	1.00911
67	1.00223	1.00369	1.00097	1.00034	0.998138	1.00219	0.999817	0.997212	1.00154	1.00611	1.01729	1.00382	1.00284	0.999774	0.997951	0.997162	1.0078	1.0108	0.989645	0.987918	0.979926	0.996255	0.985454	0.988547	0.998644	1.00917	0.994853	0.995844	0.997316	1.00713	0.990672	0.985906	1.01585	1.00079	1.00515	0.997675	1.00796	1.01733	0.998195	1.00051	1.00781	0.995005	0.991532	0.995726	0.993993	1.00112	1.00094	1.00195	1.00748
68	0.998207	0.999559	1.00241	1.00242	1.00084	1.00163	0.998855	0.997733	1.00027	1.00762	1.01825	1.00608	1.00302	1.0022	0.996641	1.00093	1.00666	1.01601	0.988034	0.988354	0.977862	0.997074	0.989074	0.988008	1.00395	1.00867	0.992351	0.995545	0.996993	1.0035	0.988883	0.982535	1.01592	0.999655	1.00086	0.999804	1.00106	1.01442	0.99828	1.00117	1.00484	0.99232	0.991938	0.996894	0.994682	0.999236	1.00064	1.00218	1.0059
69	0.996936	0.998009	1.00121	0.999731	0.997885	1.00015	0.994292	0.996778	0.998919	1.00499	1.01523	1.00333	1.00413	0.999574	0.997044	0.999966	1.00684	1.00946	0.985178	0.985233	0.97336	0.991701	0.983645	0.986516	0.998287	1.00904	0.991923	0.99297	0.993411	1.00278	0.988896	0.982433	1.01447	0.997355	1.00013	0.998071	1.00389	1.00639	0.997152	0.998119	1.00179	0.994128	0.99109	0.996734	0.994171	0.998639	0.999425	0.998042	1.00599
70	0.994338	0.996147	0.996664	0.998749	0.995539	1.00079	0.993917	0.995882	1.00066	1.00633	1.01474	1.00007	1.00084	0.998291	0.99362	0.99913	1.00611	1.00932	0.982803	0.982762	0.974744	0.990907	0.984414	0.985063	1.00112	1.00402	0.989116	0.991754	0.991654	1.0009	0.988431	0.982863	1.01124	0.992872	0.99693	0.996279	0.99473	1.00594	0.997703	0.994449	0.99949	0.992694	0.99172	0.994034	0.99265	0.998465	0.998188	0.997038	1.00273
71	0.993296	0.996375	0.997101	0.996678	0.995152	0.998169	0.990807	0.993399	0.997333	1.00331	1.00714	0.998636	0.997697	0.996561	0.994196	0.996345	1.0014	1.00208	0.978493	0.980807	0.968661	0.994252	0.976234	0.984862	0.993394	1.0011	0.983194	0.988067	0.992386	0.993206	0.985108	0.985373	1.00579	0.994825	0.99315	0.993281	0.996266	1.00234	0.993675	0.992259	0.993504	0.989945	0.98834	0.991346	0.99287	0.997283	0.993218	0.995326	1.00334
72	0.996369	0.995276	0.996131	0.995277	0.993781	0.994548	0.988795	0.994098	0.998145	1.00116	1.00471	0.997838	0.995915	0.992311	0.991099	0.996882	0.999497	0.997278	0.987817	0.978965	0.970775	0.994672	0.981602	0.982461	0.994242	0.999159	0.98301	0.983503	0.992877	0.998842	0.987911	0.982249	1.00538	0.991673	0.990824	0.990863	0.988579	1.00522	0.993128	0.989739	0.990755	0.988826	0.988544	0.99215	0.991404	0.995664	0.991953	0.994214	1.0012
73	0.994609	0.993977	0.998522	0.995408	0.991004	0.993418	0.988141	0.993871	0.994139	0.999835	1.0018	0.994788	0.993961	0.991918	0.990289	0.995426	0.996978	0.995961	0.984347	0.978378	0.96741	0.993906	0.981039	0.982314	0.992863	0.997522	0.982371	0.983936	0.986593	0.992135	0.984609	0.985676	1.00069	0.98803	0.990247	0.988795	0.9869	1.00143	0.987625	0.990086	0.988572	0.988747	0.990585	0.992409	0.991536	0.994203	0.987303	0.99274	0.997206
74	0.996076	0.996162	0.999194	0.994317	0.992902	0.992326	0.991539	0.999325	0.997699	0.999493	1.00183	0.995266	0.994328	0.991053	0.991263	0.995769	0.996232	0.993746	0.989226	0.980251	0.977133	0.995725	0.984801	0.984563	0.993954	0.99233	0.984609	0.982012	0.990604	0.998756	0.988268	0.983552	1.00237	0.9888	0.989627	0.987505	0.985708	1.00281	0.99	0.991841	0.990392	0.992639	0.991429	0.99584	0.993753	0.996955	0.987167	0.993124	0.99781
75	1.00017	0.999341	1.00126	0.995789	0.989015	0.98719	0.989289	0.999752	0.995555	1.00073	1.00243	0.994428	0.995327	0.991158	0.9859	0.994412	0.993404	0.993586	0.988038	0.986662	0.978582	0.996773	0.988008	0.987466	0.991951	0.991772	0.986356	0.985214	0.989459	0.998006	0.9915	0.98916	1.00028	0.98696	0.988769	0.985026	0.979431	1.00074	0.990584	0.992385	0.989048	0.993746	0.994788	0.999369	0.994156	0.996256	0.986512	0.995575	0.996425
76	1.00307	1.00243	1.00365	0.996134	0.991333	0.987124	0.994888	1.00425	0.995488	0.997539	1.00411	0.997925	0.997852	0.992437	0.990364	0.995498	0.995043	0.992554	0.993416	0.989591	0.986764	1.00017	0.988403	0.992013	0.995627	0.996449	0.98805	0.994324	0.993274	0.99751	0.993189	0.993962	1.00151	0.99087	0.98888	0.986704	0.97946	1.00208	0.986059	0.996197	0.989049	0.999269	0.998354	0.998615	0.996877	0.995284	0.989442	0.996276	0.997205
77	1.004	1.00301	1.00509	0.99631	0.991704	0.987279	0.996747	1.0062	0.997347	1.00021	1.00367	0.999274	0.997335	0.992539	0.993168	0.995118	0.99291	0.992768	0.99804	0.993934	0.986682	1.00302	0.991654	0.992408	0.998564	0.994889	0.991997	0.997418	0.995219	1.00295	0.994695	0.996949	1.00147	0.993749	0.990698	0.989933	0.980277	1.0004	0.991002	0.998648	0.990776	0.999755	0.999408	1.00172	0.99747	0.998417	0.99464	0.998696	0.997079
78	1.0061	1.00535	1.0074	0.998297	0.993282	0.990172	0.997299	1.00747	0.997616	0.998984	1.00518	0.998967	0.997115	0.994975	0.991307	0.995443	0.995638	0.992136	1.00068	0.995919	0.989508	1.01048	0.998384	0.994394	0.996829	0.99421	0.994247	0.998136	0.998235	1.00733	0.999582	1.00105	1.00204	0.995046	0.992283	0.991427	0.982595	1.00216	0.996436	1.0006	0.992056	1.00227	1.00152	1.00361	1.00026	1.00217	0.989396	1.00214	0.992064
79	1.00855	1.00599	1.01007	1.00035	0.993337	0.991245	1.00208	1.01059	0.99768	1.0001	1.00672	1.00423	0.998777	0.995598	0.99556	0.998192	0.994626	0.99481	1.00162	0.999243	0.996313	1.01369	1.00236	0.999341	1.00522	0.997437	0.997521	1.0032	1.00307	1.00975	1.00283	1.00301	1.00098	0.998448	0.997427	1.00081	0.988848	1.00691	0.997537	1.00438	0.995034	1.00391	1.00522	1.00881	0.999856	1.00297	0.992335	1.00204	0.99465
80	1.00924	1.01111	1.01541	1.00479	0.995647	0.996321	1.00917	1.01552	0.998303	1.00231	1.00971	1.00855	1.00528	1.00029	0.998506	0.998746	0.998182	1.0022	1.00816	0.999734	1	1.01637	1.00594	1.00736	1.00976	1.00135	1.00336	1.00911	1.00864	1.01607	1.00561	1.00662	1.00546	1.00906	1.00231	1.00648	0.9951	1.00854	0.998106	1.00608	1.00007	1.00804	1.00653	1.00901	1.00343	1.006	0.994489	1.00867	0.998214
81	1.01005	1.00894	1.0149	1.00589	0.997225	1.00031	1.01287	1.01433	0.99914	1.00574	1.01534	1.01102	1.00779	1.0056	0.996925	1.00241	0.999359	1.00135	1.00945	1.00038	1.00257	1.01544	1.00809	1.00528	1.01163	1.00961	1.01242	1.01175	1.00499	1.0157	1.00683	1.01129	1.00918	1.01181	1.00947	1.01133	1.00253	1.01107	1.00504	1.01155	1.00566	1.0114	1.01033	1.01321	1.00656	1.00995	1.00266	1.00841	1.00328
82	1.01063	1.01083	1.01251	1.00566	0.998626	1.00377	1.01159	1.01076	1.00123	1.00521	1.013	1.0107	1.00455	1.00499	1.00147	1.00372	1.00558	0.998402	1.00815	1.00107	0.998768	1.01636	1.00716	1.00478	1.01029	1.01079	1.00868	1.0126	1.01274	1.01716	1.00984	1.01125	1.00964	1.01262	1.00914	1.016	1.00437	1.00575	1.00934	1.00746	1.00477	1.01077	1.00697	1.01189	1.00645	1.00692	1.00082	1.00639	1.00007
83	1.00891	1.01019	1.0122	1.00793	1.00053	1.00817	1.01279	1.01288	1.0016	1.00833	1.01237	1.00982	1.00769	1.01092	1.00244	1.0053	1.00193	1.00127	1.00794	0.999732	1.00207	1.01355	1.00988	1.00975	1.01088	1.01283	1.01121	1.01003	1.00875	1.01684	1.00897	1.01236	1.01095	1.01715	1.01344	1.01761	1.01283	1.01041	1.00973	1.01258	1.00642	1.01097	1.00742	1.01108	1.00572	1.00762	1.0014	1.00973	1.00634
84	1.00803	1.0099	1.01084	1.00794	1.00341	1.0096	1.01269	1.01125	1.00337	1.00907	1.01224	1.01026	1.0062	1.0076	1.00459	1.00656	1.00592	0.999532	1.01393	1.00711	1.00907	1.01287	1.00582	1.00936	1.01069	1.01535	1.01014	1.00887	1.00487	1.01622	1.00645	1.0119	1.01383	1.01794	1.01333	1.01823	1.01345	1.00551	1.01048	1.00825	1.00593	1.00835	1.00647	1.00549	1.00663	1.00383	1.00637	1.00823	1.0103
85	1.00776	1.00868	1.00825	1.00698	1.00487	1.01098	1.01272	1.00759	1.00341	1.01231	1.01158	1.00656	1.00524	1.01139	1.00587	1.00814	1.01013	1.00106	1.01157	1.00194	1.00955	1.01126	1.00226	1.00636	1.00999	1.01753	1.01642	1.00938	1.00584	1.01739	1.00361	1.01099	1.01443	1.01818	1.01271	1.01862	1.01344	1.00217	1.01239	1.01234	1.00832	1.00799	1.00535	1.00316	1.00291	1.00348	1.00652	1.00848	1.0102
86	1.00664	1.00495	1.00352	1.00383	1.00312	1.00944	1.01036	1.00322	1.00547	1.01102	1.0089	1.00643	1.00232	1.01053	1.0055	1.00816	1.00993	0.998875	1.01391	1.00297	1.00794	1.00827	1.00544	1.00208	1.00723	1.02001	1.01281	1.00623	1.00565	1.01449	1.00291	1.00994	1.01405	1.0163	1.00872	1.01236	1.01237	1.00608	1.01065	1.01072	1.00644	1.00732	1.00096	1.00101	1.00269	1.00197	1.00754	1.00643	1.01118
87	1.00533	1.00324	1.00335	1.0037	1.00236	1.00845	1.00822	1.00472	1.00378	1.01217	1.00719	1.00644	1.00256	1.00537	1.00337	1.00592	1.00869	0.995086	1.01055	0.998648	1.00542	1.00558	1.0007	1.00299	1.00405	1.01411	1.01282	1.00109	1.0063	1.01226	1.00117	1.00918	1.01308	1.01428	1.00957	1.00973	1.01108	0.993524	1.01009	1.01	1.00575	1.00182	1.00169	1.00139	1.00288	1.00141	1.00904	1.00364	1.01308
88	1.00447	0.999876	0.999449	1.00415	1.00482	1.00839	1.00649	1.0024	1.00264	1.01436	1.0058	1.00497	1.00092	1.0043	1.002	1.00847	1.00671	0.989805	1.01209	0.996046	1.00549	1.00706	1.00278	1.00063	1.0025	1.01186	1.00998	0.995687	1.00401	1.00667	1.00173	1.00335	1.01287	1.01332	1.00641	1.01072	1.00662	0.999448	1.00759	1.00919	1.00192	1.00125	0.997471	0.999425	1.0013	1.00008	1.00636	1.00413	1.01292
89	1.00067	0.998154	0.997953	1.00014	1.00418	1.00772	1.00209	0.996406	1.00582	1.01095	1.00275	1.00168	0.998526	1.00109	1.00319	1.00472	1.00762	0.987905	1.00522	0.998443	1.00476	1.00263	1.00156	1.006	1.00099	1.01139	1.00746	0.994397	1.00397	1.006	0.994636	1.00281	1.01248	1.01178	1.00325	1.00455	1.00699	0.999495	1.00803	1.0056	1.00066	1.00152	0.995472	0.997961	0.997423	0.997998	1.00567	1.00347	1.01207
90	0.999518	0.997412	0.997061	0.999431	1.00278	1.00783	1.00318	0.995878	1.00517	1.01241	1.00044	1.00327	0.99771	0.999714	1.002	1.00753	1.00753	0.987047	1.00405	0.998305	0.999466	1.00075	1.00134	1.00422	1.00681	1.00965	1.00347	0.997218	1.00116	1.00604	0.99798	1.00255	1.01136	1.00978	1.00198	1.00715	1.00321	0.996764	1.00493	1.00455	0.99242	0.999582	0.99732	0.998598	0.999049	0.998919	1.00536	1.00234	1.01119
91	0.996714	0.9925	0.993499	0.996544	1.0008	1.00165	0.998144	0.995035	1.00159	1.00589	0.997342	0.999134	0.994829	0.996959	1.0004	1.00397	1.00216	0.981994	0.998081	0.990428	0.995534	0.998406	0.996827	0.998465	0.995744	1.00526	0.999591	0.99218	0.999364	1.00074	0.992393	0.998132	1.00658	1.0023	0.998788	1.00458	0.994143	0.994689	1.00331	0.999621	0.990164	0.996348	0.997641	0.99591	0.997091	0.994546	0.998197	0.998499	1.00919
92	0.998178	0.994658	0.994836	0.998951	1.00191	1.00435	0.998242	0.9955	1.00042	1.00911	0.996752	0.999026	0.995888	0.996063	0.999002	1.00403	1.005	0.983325	1.00431	0.992743	0.995866	0.999245	1.00014	1.00027	0.996915	1.00576	0.999568	0.99614	1.00084	1.00263	0.993637	0.999806	1.01031	1.00299	0.99843	1.00408	0.993722	0.993382	1.00047	1.00054	0.990441	0.996111	0.999333	0.996253	0.997325	0.997594	1.00596	0.998629	1.00967
93	0.994843	0.990849	0.991112	0.995364	0.99727	0.999859	0.9928	0.990214	0.997462	1.00353	0.993521	0.995901	0.993538	0.992753	0.996613	0.998585	0.997211	0.980243	1.00127	0.983192	0.990532	0.993065	0.994685	0.996406	0.996776	1.00007	0.992246	0.992922	0.995181	0.998669	0.992033	0.998699	1.00161	0.994756	0.991036	0.997214	0.988554	0.998258	1.00364	0.995869	0.986919	0.995404	0.994801	0.992705	0.995932	0.991079	0.998688	0.996239	1.00484
94	0.993494	0.988983	0.990454	0.992455	1.00055	1.00073	0.990572	0.991649	1.00328	1.00234	0.991261	0.994895	0.993713	0.993059	0.997999	1.00062	0.998428	0.97942	0.996772	0.984085	1.00784	0.992604	0.993743	0.996345	0.991628	0.998404	0.988849	0.992681	0.994311	0.994627	0.988954	0.99874	1.00136	0.991878	0.992579	0.994037	0.990383	0.992079	0.996819	0.994184	0.985462	0.993147	0.998408	0.994372	0.99838	0.993537	0.998951	0.994126	1.00482
95	0.99599	0.98791	0.989058	0.994515	0.999181	0.999958	0.989119	0.993608	1.0003	1.00166	0.992484	0.993937	0.994181	0.989546	1.00022	0.997917	0.998597	0.981298	0.9972	0.981951	1.00652	0.99234	0.99053	0.997239	0.994571	0.993369	0.988478	0.991447	0.994847	0.995533	0.990595	0.998806	1.00183	0.991084	0.988455	0.989779	0.988666	0.997452	0.999386	0.994048	0.987919	0.99255	0.997092	0.99278	0.996569	0.994778	0.999093	0.994152	1.00356
96	0.993297	0.987073	0.989273	0.994004	0.997936	0.995195	0.985938	0.990618	1.00052	0.998984	0.98753	0.992085	0.993095	0.990198	0.996504	0.999712	0.996343	0.979917	0.994646	0.992581	1.00686	0.990827	0.990403	0.994527	0.993622	0.990667	0.986897	0.994616	0.998435	0.992683	0.988126	0.995066	0.999222	0.986514	0.991316	0.990989	0.986373	0.99666	0.995542	0.992157	0.985563	0.994306	0.998486	0.99245	0.996932	0.993177	0.995778	0.994359	1.00087
97	0.993762	0.987146	0.988798	0.992496	0.99558	0.991187	0.984603	0.99316	0.995944	0.998745	0.986959	0.992063	0.990284	0.988005	0.994807	0.997564	0.9923	0.977163	0.994117	0.992849	1.00986	0.992339	0.990357	0.992894	0.989553	0.986255	0.985422	0.994778	0.996115	0.994468	0.988183	0.994348	0.993018	0.980434	0.986641	0.987394	0.984842	0.995132	0.992498	0.993734	0.985931	0.99337	1.00153	0.99578	0.999197	0.993187	0.989619	0.991433	0.993916
98	0.994342	0.989732	0.990974	0.99404	0.996136	0.989536	0.986484	0.996578	0.996829	0.995552	0.983277	0.988947	0.993392	0.989785	0.996043	0.998111	0.993585	0.978863	0.993527	0.995197	1.00748	0.993065	0.994674	0.996519	0.993597	0.985223	0.991332	0.995087	0.998911	0.994961	0.989262	0.997456	0.991009	0.981956	0.985304	0.983775	0.982919	0.995689	0.988389	0.994421	0.987954	0.994085	1.00381	0.997646	1.00205	0.994313	0.99374	0.992613	0.996629
99	0.996782	0.992855	0.993503	0.99327	0.993613	0.993007	0.988167	0.997553	0.998179	0.994867	0.985397	0.98942	0.993512	0.988828	0.994144	0.995873	0.992882	0.982187	0.994843	0.998008	1.01195	0.994608	0.995173	0.995542	0.992561	0.983679	0.991995	0.994994	1.00743	0.995176	0.992761	0.998873	0.990947	0.978275	0.982714	0.982051	0.985324	0.995175	0.991367	0.995196	0.986918	0.998007	1.00673	1.00098	1.00386	0.993585	0.991017	0.991974	0.993061
100	0.998818	0.99546	0.99372	0.993785	0.997063	0.989004	0.98939	1.00088	0.99801	0.991688	0.984728	0.993202	0.994634	0.989895	0.991216	0.99609	0.992262	0.982399	0.997123	1.00075	1.00867	0.994804	0.998507	0.999414	0.992443	0.981216	0.999387	1.00078	1.00608	0.996118	0.993438	0.997725	0.990688	0.983098	0.984679	0.982666	0.982874	0.996621	0.992321	0.999333	0.988362	0.998295	1.00776	1.00587	1.00479	0.994833	0.989573	0.992695	0.990812
101	0.998689	0.998103	0.998861	0.996114	0.996967	0.990193	0.991427	1.00504	0.998963	0.992741	0.987272	0.995631	0.996424	0.990386	0.9933	0.995317	0.989856	0.988568	1.01115	1.01422	1.01603	0.996261	1.01132	1.00127	0.998175	0.983735	1.00144	1.00753	1.00842	1.00077	0.998609	1.0026	0.991009	0.984446	0.98825	0.988391	0.987519	0.997433	0.994941	1.00423	0.992833	1.00096	1.01026	1.00883	1.00823	0.996862	0.99413	0.998217	0.990959
102	1.00262	1.00043	0.997032	0.998119	0.996911	0.992876	0.995579	1.00826	0.999011	0.994717	0.990341	0.996173	0.998285	0.993612	0.996285	0.995892	0.98896	0.989491	1.01415	1.01915	1.01913	0.99999	1.01732	1.00607	1.0013	0.983818	1.01053	1.01519	1.01551	1.00241	1.00479	1.00298	0.992092	0.981219	0.995767	0.987982	0.987328	1.00055	0.992752	1.00736	0.995879	1.00597	1.01539	1.01251	1.01083	1.0014	0.996147	0.997125	0.989987
103	1.00628	1.00424	1.00377	1.00061	0.999875	0.992838	0.99978	1.0108	0.999772	0.995192	0.995882	1.00217	1.00251	0.996969	0.996892	0.996122	0.994101	0.998522	1.01898	1.02482	1.02322	1.00062	1.02186	1.00918	1.00728	0.987738	1.0172	1.01997	1.01991	1.00652	1.01245	1.0102	0.992221	0.994882	0.998073	0.997634	0.994121	1.00536	0.998348	1.01223	1.00154	1.00815	1.01793	1.01402	1.01279	1.00492	0.999997	1.00426	0.99578
104	1.00627	1.00654	1.0026	1.00234	0.998327	0.99473	1.00375	1.00939	0.999702	0.993625	0.998441	1.00279	1.00203	1.00044	0.999097	0.999296	0.992187	1.00029	1.01843	1.02169	1.02269	1.00181	1.02006	1.01521	1.00704	0.989551	1.01913	1.01897	1.02064	1.00743	1.01366	1.01032	0.993612	0.998556	1.00246	0.997851	0.994367	1.00354	0.997228	1.01155	0.999575	1.00814	1.01656	1.01629	1.01335	1.00768	1.00139	1.00357	0.996197
105	1.00704	1.0071	1.0058	1.00619	1.00545	1.00145	1.00464	1.01152	0.99843	0.99311	1.00071	1.00622	1.00566	1.00214	0.998897	0.997621	0.993842	1.00405	1.0207	1.02495	1.02552	1.00735	1.02023	1.0185	1.00459	0.995412	1.02004	1.02301	1.02257	1.00857	1.01737	1.0124	0.993751	1.00282	1.00686	1.00646	1.00219	1.0124	1.00171	1.00933	1.00554	1.01146	1.0189	1.01599	1.01674	1.01018	1.00348	1.00685	0.996916
106	1.00704	1.00966	1.00415	1.00723	1.0059	1.00309	1.00773	1.01008	1.00193	0.99549	1.00049	1.00288	1.00623	1.00458	1.00138	0.999805	0.996455	1.00654	1.01864	1.0226	1.02265	1.00722	1.0208	1.01834	1.01266	0.996778	1.02473	1.01906	1.02102	1.01069	1.02267	1.01777	0.993407	1.01067	1.01381	1.00981	1.00319	1.0085	1.00193	1.01155	1.00509	1.01266	1.01607	1.01346	1.01361	1.00884	1.00586	1.0094	0.99752
107	1.00512	1.00657	1.0046	1.00678	1.00478	1.00369	1.00964	1.01012	1.003	0.992489	0.998243	1.005	1.00404	1.00603	1.00185	1.00009	0.998633	1.0084	1.01719	1.01913	1.02231	1.00845	1.0195	1.01894	1.00959	0.997359	1.02211	1.01861	1.01761	1.00574	1.01964	1.01798	0.99338	1.01143	1.00786	1.00977	1.00778	1.01089	1.00294	1.00766	1.00541	1.00802	1.01779	1.00846	1.01077	1.00915	1.00611	1.00987	0.996474
108	1.00523	1.0057	1.00395	1.00581	1.00842	1.00699	1.0138	1.00865	1.00079	0.995217	0.997866	1.0053	1.00525	1.00648	1.00362	1.00176	1.00437	1.00998	1.01854	1.01696	1.02523	1.00706	1.01944	1.01469	1.0081	1.00324	1.02216	1.01807	1.01243	1.00934	1.0188	1.01715	0.992081	1.01678	1.01311	1.01351	1.0134	1.00847	1.00454	1.00662	1.01135	1.00977	1.01657	1.00972	1.00946	1.00584	1.00561	1.006	0.999657
109	1.00048	1.00537	0.999603	1.00331	1.00476	1.00486	1.00804	1.00346	1.00117	0.992963	0.991836	1.00201	1.00238	1.00328	1.0018	1.00169	0.999646	1.00489	1.01314	1.01395	1.02228	1.00275	1.01535	1.01545	1.0043	1.00014	1.01474	1.01231	1.00958	1.00771	1.01754	1.01615	0.989876	1.01481	1.00988	1.01016	1.0097	0.998992	1.00497	1.00116	1.00354	1.0049	1.01344	1.00141	1.00453	1.00532	1.0058	1.00446	0.997966
110	1.00318	1.00438	0.999862	1.00096	1.00744	1.00939	1.00975	1.0023	1.0025	0.996282	0.992703	1.00248	1.00375	1.00325	1.0074	1.00316	1.00297	1.00508	1.01094	1.01225	1.02312	1.00063	1.01872	1.01601	1.00717	1.00288	1.01665	1.01218	1.00894	1.00631	1.01771	1.01739	0.991854	1.01925	1.00905	1.01143	1.01056	1.00337	1.00781	1.00221	1.00666	1.00367	1.01058	1.00168	1.00688	1.00506	1.00809	1.00205	1.00092
111	0.999126	1.00191	1.00004	1.00162	1.00786	1.00889	1.00604	1.00015	1.00207	0.997113	0.993257	1.00145	1.00198	1.00409	1.00894	1.00183	1.00325	1.00332	1.01008	1.01072	1.02264	0.998671	1.01327	1.0123	1.00991	1.00345	1.01396	1.01163	1.00746	1.00658	1.01657	1.01346	0.989171	1.01598	1.00836	1.00532	1.01275	0.997269	1.00859	0.998514	1.00374	1.00341	1.00699	1.00082	1.00462	1.00284	1.00912	1.00241	1.00177
112	0.995259	0.998719	0.995153	0.999993	1.00683	1.00764	1.00259	0.997424	1.00073	0.997082	0.989511	0.998143	0.997891	1.00112	1.00541	1.00165	1.00305	1.00172	1.00666	1.00825	1.01607	0.998076	1.01013	1.0092	1.00319	1.00156	1.01052	1.01074	1.00552	0.999252	1.01345	1.01316	0.987524	1.01533	1.00301	1.00578	1.00783	0.992146	1.0027	0.996544	1.00139	1.00099	1.00121	0.999456	1.00233	1.00255	1.00753	0.99939	0.999312
113	0.996384	0.99493	0.994773	0.997919	1.00482	1.00618	1.00095	0.994412	1.00068	0.997058	0.989364	0.998778	1.00094	1.00021	1.00513	1.00536	1.00129	1.00111	1.00668	1.00494	1.01473	1.00254	1.00719	1.00824	1.00154	1.00288	1.00834	1.00923	1.00316	0.995788	1.0096	1.01314	0.985967	1.01108	1.001	1.00237	1.00566	0.990008	1.00145	0.994044	0.999775	0.998897	0.998499	0.996301	1.00133	0.999857	1.00382	0.996823	1.00149
114	0.992305	0.99631	0.993208	0.998039	1.00522	1.00601	1.00024	0.993365	0.998842	0.99508	0.987935	0.995443	0.998125	0.998054	1.00513	1.00096	1.00464	0.997534	1.00502	1.00263	1.0116	1.00814	1.00558	1.00639	1.00139	1.00017	1.00768	1.01037	0.999641	0.992923	1.00784	1.01403	0.985458	1.00959	0.997608	1.00159	1.00782	0.987513	1.00674	0.989037	0.99969	0.999819	0.996437	0.997332	1.00349	1.00282	1.00877	0.992708	0.999548
115	0.990002	0.994001	0.988683	0.99386	1.00401	1.00244	0.992655	0.989062	0.998657	0.992336	0.984476	0.991322	0.995019	0.993252	1.00401	0.999243	0.999527	0.993333	1.00061	0.997194	1.00526	1.00095	1.00296	1.00465	0.997743	0.995555	0.999798	1.00386	0.994387	0.98849	1.00341	1.0098	0.982306	1.00379	0.994902	0.998345	1.00174	0.981411	1.0037	0.989014	0.997632	0.994426	0.991589	0.995499	1.00058	0.99713	1.00567	0.99295	0.997373
116	0.988868	0.992106	0.988731	0.992678	1.00342	1.00228	0.994878	0.99018	0.99805	0.992894	0.985202	0.992422	0.994598	0.995629	1.00381	0.998042	0.998928	0.996669	1.00047	0.996249	1.00573	1.00145	1.00342	1.00361	1.00039	0.995675	1.00448	0.99974	0.99351	0.985686	1.00609	1.01025	0.98344	1.00133	0.990705	0.99738	1.00329	0.980957	0.999665	0.985617	0.996257	0.995421	0.990679	0.997498	0.999788	0.997128	1.00526	0.990787	0.994216
117	0.988332	0.989093	0.986736	0.989904	0.999684	0.998225	0.991239	0.9867	0.998033	0.994114	0.981817	0.988756	0.996116	0.990642	1.00404	0.996001	0.996168	0.992884	0.995645	1.01033	1.00508	0.995701	1.00072	1.00369	0.996207	0.990301	0.999922	0.997986	0.992091	0.981666	1.00551	1.00942	0.979228	0.99683	0.985757	0.99329	0.99288	0.978265	0.995493	0.983798	0.994701	0.994184	0.990921	0.993303	0.998605	0.992126	1.0038	0.986602	0.993798
118	0.986486	0.988004	0.987685	0.991412	1.00317	0.998407	0.988633	0.987441	0.998377	0.992878	0.981255	0.989294	0.99502	0.992071	1.00044	0.995723	0.996202	0.994964	0.996869	1.01211	1.00542	0.995602	1.00221	1.00116	0.999619	0.987249	1.00105	0.994481	0.998412	0.9793	1.00638	1.01021	0.979189	0.991653	0.985404	0.993902	0.995095	0.979993	0.996043	0.982042	0.99442	0.992009	0.99208	0.991886	1.00231	0.994359	1.00305	0.986856	0.992383
119	0.986674	0.987107	0.985694	0.987689	1.00102	0.996585	0.986114	0.987521	0.99967	0.992738	0.980386	0.983971	0.992986	0.99158	1.00053	0.994743	0.993479	0.993094	0.99397	1.00914	1.00162	0.993273	0.998923	0.99865	0.994391	0.983009	0.996322	0.991734	0.99675	0.978258	1.00066	1.00647	0.97758	0.986483	0.982733	0.985589	0.992038	0.97782	0.987494	0.980612	0.994182	0.992788	0.99329	0.992941	1.00187	0.994301	1.00009	0.98467	0.98725
120	0.987142	0.988765	0.98612	0.990694	0.999386	0.994756	0.985587	0.987008	0.99614	0.993117	0.981023	0.986562	0.992433	0.989501	0.998501	0.99556	0.994656	0.994928	1.00455	1.01262	1.00437	0.993327	1.00023	1.0022	0.996311	0.980794	0.997325	0.989707	0.995232	0.979321	1.00403	1.00768	0.976861	0.985103	0.981571	0.986056	0.988251	0.98173	0.992101	0.981968	0.994814	0.992032	0.9934	0.996059	1.00408	0.994554	0.998929	0.985733	0.984589
121	0.987294	0.990159	0.987821	0.988163	0.998192	0.994042	0.988577	0.988028	0.999169	0.987622	0.98037	0.986883	0.993361	0.990429	0.997537	0.99431	0.993307	0.996983	1.00405	1.01331	1.00057	0.995594	0.998832	1.0022	0.998607	0.978351	0.996353	0.991525	0.994398	0.980438	1.00395	1.0085	0.974809	0.983532	0.979826	0.984656	0.98822	0.981444	0.987833	0.981759	0.99443	0.992686	0.998805	1.00101	1.00556	0.995131	0.998874	0.987093	0.983586
[truncated: 65 more columns]

## Sheet: experiment_1_period_length
	condition	period	gof
0	VIRc	23.89	0.418164
1	VIRc	24.15	0.519941
2	VIRc	24.15	0.278817
3	VIRc	24.48	0.615317
4	VIRc	23.87	0.273744
5	VIRc	23.8	0.558328
6	VIRc	24.26	0.431627
7	VIRc	23.41	0.53802
8	VIRc	24.11	0.348991
9	VIRc	24.02	0.637355
10	VIRc	24.7	0.383534
11	VIRc	23.99	0.358115
12	VIRc	23.91	0.26657
13	VIRc	24.28	0.575963
14	VIRc	24.64	0.45555
15	VIRc	23.58	0.46264
16	VIRc	23.4	0.461887
17	VIRc	24.93	0.487175
18	VIRc	24.13	0.300489
19	VIRc	23.01	0.67918
20	VIRc	24.61	0.380583
21	VIRc	24.3	0.540646
22	VIRc	25.03	0.333364
23	VIRc	24.4	0.557787
24	VIRc	24.46	0.392891
25	VIRc	24.97	0.989733
26	VIRc	24.02	0.530843
27	VIRc	24.33	0.476644
28	VIRc	23.92	0.459945
29	VIRc	24.68	0.355797
30	vir-1	24.61	0.380954
31	vir-1	24.58	0.339438
32	vir-1	24.99	0.390879
33	vir-1	25.1	0.486935
34	vir-1	24.05	0.800747
35	vir-1	25.03	0.464266
36	vir-1	24.75	0.325403
37	vir-1	24.27	0.319527
38	vir-1	24.74	0.309618
39	vir-1	24.25	0.452992
40	vir-1	25.15	0.377262
41	vir-1	25.42	0.533068
42	vir-1	24.76	0.386198
43	vir-1	24.45	0.608899
44	vir-1	25.07	0.327241
45	vir-1	24.7	0.481835
46	vir-1	24.76	0.400508
47	vir-1	24.61	0.341991
48	vir-1	24.49	0.297577
49	vir-1	24.6	0.364655
50	vir-1	24.68	0.316487
51	vir-1	24.92	0.397534
52	vir-1	24.95	0.410677
53	vir-1	25.06	0.471296
54	WT	23.37	0.569255
55	WT	24.32	0.637892
56	WT	24.44	0.422947
57	WT	24.86	0.444652
58	WT	23.66	0.433937
59	WT	24.36	0.513998
60	WT	23.87	0.325255
61	WT	24.91	0.637251
62	WT	23.34	0.434946
63	WT	24.15	0.493265
64	WT	23.88	0.643058
65	WT	27.81	0.89113
66	WT	23.87	0.572164
67	WT	23.73	0.419029
68	WT	23.78	0.435387
69	WT	24.1	0.537941
70	WT	23.67	0.477674
71	WT	23.87	0.370257
72	WT	23.82	0.36456
73	WT	24.41	0.499025
74	WT	24.43	0.279443
75	WT	23.98	0.507908
76	WT	24.05	0.432962
77	WT	26.24	0.836595
78	WT	26.83	0.714032
79	WT	24.65	0.560382
80	WT	25.5	0.545223
81	WT	24.47	0.346142
82	WT	24.07	0.476318
83	WT	24.08	0.460293
84	WT	24.02	0.374946
85	WT	24.12	0.40433
86	WT	23.52	0.3563
87	WT	23.62	0.561882
88	WT	23.52	0.427988
89	WT	23.9	0.345229
90	WT	24.74	0.541211
91	WT	25.62	0.456472
92	WT	23.93	0.507959
93	WT	24.04	0.294093
94	WT	24	0.351318
95	WT	23.64	0.414787
96	WT	24.18	0.380349
97	WT	24.88	0.488278
98	WT	24.95	0.460831
99	WT	24.49	0.548698
100	WT	24.54	0.448449
101	WT	24.19	0.564076
102	WT	23.56	0.476936
103	WT	24.1	0.434339
104	WT	22.64	0.628307

## Sheet: experiment_2_period_length
	condition	period	gof
0	WT	23.84	0.270934
1	WT	24.07	0.350335
2	WT	24.22	0.360081
3	WT	24.58	0.422094
4	WT	24.32	0.35671
5	WT	24.38	0.365449
6	WT	23.3	0.283402
7	WT	24.7	0.505248
8	WT	25.1	0.570092
9	WT	24.61	0.282535
10	WT	24.28	0.339323
11	WT	24.61	0.291255
12	WT	24.59	0.306281
13	WT	25	0.449874
14	WT	24.33	0.393527
15	WT	24.69	0.362756
16	WT	24.13	0.2859
17	WT	24.89	0.436374
18	WT	23.93	0.258082
19	WT	23.71	0.417554
20	WT	23.59	0.437117
21	WT	23.33	0.351124
22	WT	24.22	0.398061
23	WT	23.86	0.320872
24	WT	23.79	0.37151
25	WT	23.58	0.543769
26	WT	24.22	0.308058
27	WT	23.93	0.318674
28	WT	23.59	0.469017
29	WT	23.48	0.614015
30	WT	23.63	0.308759
31	WT	24.22	0.32825
32	WT	23.76	0.368455
33	WT	24.55	0.446909
34	WT	23.92	0.436649
35	WT	24.05	0.428597
36	WT	24.15	0.342522
37	WT	24.36	0.306323
38	WT	23.17	0.474089
39	WT	24.18	0.323403
40	WT	23.95	0.42762
41	WT	23.78	0.294961
42	WT	23.79	0.330885
43	WT	23.08	0.38631
44	WT	23.39	0.450004
45	WT	22.71	0.598186
46	WT	23.59	0.453062
47	WT	23.9	0.480175
48	WT	24.22	0.434779
49	WT	24.45	0.465926
50	WT	24.56	0.304199
51	WT	24.78	0.424274
52	WT	23.79	0.452374
53	WT	23.45	0.425104
54	WT	24.15	0.457093
55	WT	24.6	0.653266
56	WT	25.3	0.349041
57	WT	24.26	0.318884
58	WT	23.85	0.338037
59	WT	24.73	0.383823
60	WT	24.39	0.327362
61	WT	24.49	0.349155
62	VIRc	24.14	0.384492
63	VIRc	24.64	0.390235
64	VIRc	24.39	0.340366
65	VIRc	23.82	0.300104
66	VIRc	24.88	0.453306
67	VIRc	24.46	0.295192
68	VIRc	24.58	0.403133
69	VIRc	24.08	0.410448
70	VIRc	23.93	0.466543
71	VIRc	23.58	0.439497
72	VIRc	23.98	0.662307
73	VIRc	24.02	0.45985
74	VIRc	25.11	0.354812
75	VIRc	23.41	0.38947
76	VIRc	24.29	0.428748
77	VIRc	23.93	0.503017
78	VIRc	23.96	0.285027
79	VIRc	24.82	0.431334
80	VIRc	23.46	0.423981
81	VIRc	24.51	0.322136
82	VIRc	23.79	0.440575
83	VIRc	24.02	0.461515
84	VIRc	24.05	0.477883
85	VIRc	24.4	0.346473
86	VIRc	23.52	0.412838
87	VIRc	24.85	0.466292
88	VIRc	24.3	0.776385
89	VIRc	24.7	0.287981
90	VIRc	23.82	0.436041
91	vir-1	25.61	0.462747
92	vir-1	25.31	0.26831
93	vir-1	26.66	0.359417
94	vir-1	24.25	0.401228
95	vir-1	24.45	0.487963
96	vir-1	25.96	0.463274
97	vir-1	24.64	0.568892
98	vir-1	25.64	0.451164
99	vir-1	24.65	0.429232
100	vir-1	25.72	0.358807
101	vir-1	25.43	0.41257
102	vir-1	26.08	0.294499
103	vir-1	25.33	0.513269
104	vir-1	25.79	0.346012
105	vir-1	25.78	0.418939
106	vir-1	25.22	0.358938
107	vir-1	25.07	0.485305
108	vir-1	25.59	0.360485
109	vir-1	25.41	0.530319
110	vir-1	25.87	0.428953
111	vir-1	26.03	0.438477
112	vir-1	25.76	0.34008
113	vir-1	25.08	0.382051
