# Supplementary material for: Nanopore direct RNA sequencing maps the complexity of Arabidopsis mRNA processing and m6A modification
Source: eLife. 2020 Jan 14;9:e49658. doi: 10.7554/eLife.49658 (PMC6959997; doi:10.7554/eLife.49658)
Supplement: Figure 6—source data 3. [file elife-49658-fig6-data3.tds]

1	6787	9130	AT1G01020	0.4150147585	-	57	38	129.0399933	22.93799973	272.4580078	153.7549973	15.46824994	241.3809948	0.1842105263	0.3845787128	0.709456153	937	0.1345100665	0.3078418858
1	11648	13714	AT1G01030	0.3597181036	-	18	12	67.28499985	12.81974983	162.7254982	93.17500305	15.85199993	120.1752497	0.3055555556	0.4367992625	0.7456996349	91	0.2424320606	0.3910932298
1	23120	31227	AT1G01040	1.280034632	+	35	30	159.4600067	64.75949917	296.3435013	142.8650055	32.30175133	223.265004	0.3238095238	0.05247656117	0.2835414094	377	0.02613042999	0.1387126563
1	31169	33171	AT1G01050	0.106289068	-	165	169	82.29000092	15.40799971	237.7930038	81.87999725	14.72999973	217.8	0.07075488614	0.7829083626	0.9351682236	13294	0.2313394403	0.3840512911
1	33364	37871	AT1G01060	1.084052589	-	117	223	81.61000061	13.46099968	207.327002	65.73000336	9.375500059	257.6409988	0.1420029895	0.08240383263	0.3567887123	11849	0.08241776692	0.2476622374
1	44969	47059	AT1G01080	0.8670041583	-	206	217	86.22000122	19.1624999	202.7025051	82.15000153	16.86599998	216.4880066	0.1113820411	0.1358300441	0.4535942115	21264	0.1936516638	0.3561592981
1	47233	49304	AT1G01090	8.189324834	-	382	713	84.77000046	25.71849937	170.0887478	71.83000183	19.88199959	178.8200043	0.1966545017	6.466587607e-09	6.025118645e-07	110086	8.371460285e-08	5.712637335e-06
1	49908	51210	AT1G01100	2.904266696	-	1397	2374	53.83000183	12.82400017	164.5000061	48.1099987	11.20649996	165.161499	0.06450728755	0.001246617743	0.02544886081	1548459	0.0003368465504	0.00771033797
1	51952	54737	AT1G01110	0.02902991624	+	17	33	81.26999664	24.3579998	164.9579956	91.48999786	20.94199982	266.1600037	0.1532976827	0.9353412412	0.990598863	268	0.4029352924	0.4674859893
1	57163	59215	AT1G01120	0.2048520875	-	203	278	62.36000061	13.17750006	148.6369942	61.06999969	12.96999972	141.6949936	0.06859340114	0.623947304	0.8631510691	26989.5	0.2075448658	0.3671546168
1	64165	67774	AT1G01140	0.4575313951	-	142	90	79.72999954	17.02500048	219.7092445	84.90499878	17.82675033	185.3172501	0.1234741784	0.3487133748	0.6823571489	6238.5	0.3808966004	0.4594428253
1	72338	74096	AT1G01160	1.089351848	+	92	112	91.04000092	11.11150002	218.7989994	72.59500122	11.8467499	230.7290016	0.174689441	0.08140445111	0.355166099	4542	0.07314949443	0.2352274118
1	73930	74737	AT1G01170	0.1503147003	-	279	378	60.95999908	13.59499989	173.9505058	61.375	12.61899989	186.2222492	0.0548728452	0.7074329755	0.9051077236	51742	0.3405138488	0.442123743
1	75389	76845	AT1G01180	0.1352615094	+	60	32	55.96000099	13.00749974	136.9632473	53.71500015	14.08975024	182.9607464	0.1458333333	0.7323833973	0.9157372047	926	0.3918013839	0.4634362626
1	88621	90502	AT1G01210	0.02186917036	+	78	95	68.70500183	18.71824985	202.1422562	71	15.4829999	179.8315002	0.07759784076	0.950891203	0.995748734	3597	0.3714722415	0.4553353739
1	91341	95681	AT1G01220	0.02600011379	+	35	23	86.11000061	16.18200073	205.8190048	80.51999664	11.11200008	247.3125	0.1366459627	0.9418893497	0.9924123562	363	0.2676572794	0.4043625815
1	97411	99240	AT1G01230	1.787417282	+	115	141	75.63999939	14.16200027	145.8644974	58.25	8.375000238	176.6100006	0.1916127043	0.0163148362	0.1501812186	6460.5	0.002602956281	0.03426989995
1	99864	101987	AT1G01240	0.09670927972	+	116	109	81.49499893	14.65249968	203.0937481	82.19000244	15.53000002	251.1279984	0.08446694084	0.8003698499	0.9392425505	6067	0.3009976977	0.4225421611
1	104439	105330	AT1G01250	0.09857363206	-	27	33	41.83000183	7.619500017	93.9519989	46.72000122	12.75999975	109.8699966	0.1616161616	0.7969413624	0.9381531773	407	0.2861598529	0.4156342996
1	108945	111699	AT1G01260	0.2748474265	+	71	96	86.09999847	15.65999961	208.659996	89.13999939	15.58875	252.5350094	0.1238262911	0.5310709839	0.807440498	3278	0.337528043	0.440708777
1	114201	116407	AT1G01290	0.6704570819	+	41	36	88.25	23.55999947	276.8099976	82.69499969	20.08750057	176.7662544	0.2337398374	0.2135713132	0.559270277	614	0.1036795239	0.2740162681
1	116783	118845	AT1G01300	6.447898254	+	177	157	76.23999786	23.81999931	168.376004	57.45999908	20.74599953	154.2570068	0.3012343013	3.565346526e-07	2.432972383e-05	9909.5	3.03655996e-06	0.0001486074041
1	121066	130577	AT1G01320	3.338813026	-	212	273	114.9850006	20.28475003	254.7644955	96.30999756	18.09800034	235.6579956	0.1851890248	0.0004583391699	0.01220139164	24575	0.002189846157	0.03037240494
1	136089	138162	AT1G01350	3.005192985	+	45	40	104.4599991	26.43099995	199.1190018	50.76499939	11.59200037	155.8290024	0.4111111111	0.0009881139154	0.02096676753	476	9.623139938e-05	0.002700966105
1	141869	143261	AT1G01360	1.579572709	+	37	64	65.55999756	14.96200037	172.3230057	50.15999985	9.399749887	159.3632462	0.2951858108	0.02632857117	0.1972607124	903.5	0.02421366126	0.1334137856
1	154366	156178	AT1G01420	0.9090430991	-	39	48	61.40000153	17.77050056	117.9889988	51.42499924	18.99625006	131.6932537	0.2467948718	0.1232982467	0.4338224353	856	0.2487206077	0.3945812604
1	156476	158823	AT1G01430	1.927796221	-	241	309	70.55000305	19.55999947	161.4499969	62.66999817	11.96099997	172.1940063	0.136150613	0.01180874593	0.1235583679	32751	0.007667836941	0.06905150044
1	159627	162953	AT1G01440	0.7653965156	-	23	29	102.6500015	35.0529994	240.170005	88.80999756	22.10099974	187.9110001	0.2968515742	0.1716340634	0.505000225	252	0.06780186188	0.2275456159
1	163277	166353	AT1G01448	0.5188315649	+	27	23	133.6399994	25.22099934	230.9594986	149	22.30050058	230.6850067	0.2640901771	0.3028087602	0.6495874712	254	0.1378390535	0.3108531346
1	171524	172948	AT1G01470	0.5035560606	-	297	379	63.47999954	12.86400013	155.1740021	59.75999832	11.67049994	162.7204979	0.073772021	0.3136490233	0.6570478882	53479	0.1330900523	0.3064740036
1	180016	182749	AT1G01490	0.1038228898	-	207	210	74.79000092	12.43249969	156.5959938	72.65000153	11.30750003	186.0487473	0.06314699793	0.7873668214	0.9354906667	21597.5	0.455675696	0.4859481978
1	185032	187135	AT1G01500	1.407410393	+	57	77	80.19999695	18.34799976	161.7039978	63.75	11.71300039	134.7069962	0.2392344498	0.03913718701	0.2400249001	1661	0.008227592148	0.07213895919
1	187144	190472	AT1G01510	0.08578514488	+	92	79	65.25500107	13.82375021	202.6844982	66.76999664	12.38950009	209.6049942	0.09479911943	0.8207574909	0.9482452328	3418	0.2521698682	0.3972438881
1	190407	192436	AT1G01520	0.1591943798	+	32	45	103.1399994	13.1420001	208.6457516	87.95999908	11.18399992	196.3550064	0.1590277778	0.6931155146	0.8990214175	633	0.1856385517	0.350621937
1	195644	198787	AT1G01540	1.727771322	+	61	119	99.29000092	23.32999992	213.3099976	78.62000275	14.16400042	207.5049995	0.2355696377	0.01871667409	0.1629999148	2873	0.01116432109	0.08687013226
1	199526	201775	AT1G01550	2.796398193	+	635	639	80.16000366	15.30599971	197.2429993	67.5	12.10749989	171.6724983	0.105070669	0.00159809211	0.03060377973	174998.5	1.084994779e-05	0.0004531723883
1	221641	224351	AT1G01610	1.93826281	-	143	266	77.23999786	28.39199972	198.5214966	64.34999847	21.32250023	196.1937542	0.1642567958	0.01152755466	0.1216797436	16084.5	0.005031549392	0.05223826458
1	225664	227543	AT1G01620	12.49316196	-	1499	3084	48.31999969	11.11449976	157.2539993	38.38999939	9.56000042	155.1077499	0.120373591	3.21246232e-13	5.558707122e-11	1963944.5	6.723792434e-17	1.416381493e-14
1	228798	230979	AT1G01630	0.545931797	+	160	184	63.87999916	14.81575036	170.1599953	59.17500114	10.19924991	179.0252495	0.1051630435	0.2844907846	0.6332425044	13293.5	0.06057070317	0.2153608538
1	232839	237905	AT1G01650	0.01783186353	-	86	74	106.4300003	19.61124921	239.9374962	109.0800018	14.0625	206.8055012	0.07856693903	0.959772134	0.9976858763	3096.5	0.3855669431	0.4613361553
1	262827	266324	AT1G01710	0.5486655087	+	36	55	102.9099998	23.23999941	220.5912533	97.63999939	20.79849977	271.5620033	0.2055555556	0.282705652	0.6313962281	940	0.3439288515	0.4430749266
1	267992	269819	AT1G01720	0.9909271561	+	206	247	70.63499832	15.14874995	155.2612553	77.22000122	9.359499598	189.1824944	0.1136747769	0.102111074	0.3946198441	24309	0.2073869738	0.3670266374
1	269791	270859	AT1G01725	0.07201356612	-	46	51	64.92499924	12.72375011	195.5087509	79.5	12.09500027	227.7675018	0.1210571185	0.8472009496	0.9592635197	1085	0.2636437234	0.4028236644
1	270796	272189	AT1G01730	0.09107630884	+	150	125	63.36499977	12.82374997	173.1874962	63.20999908	10.9840004	170.148996	0.076	0.8108185783	0.9437919635	9255	0.4278024985	0.4765930341
1	272110	274930	AT1G01740	0.2493471097	-	18	16	133.0050049	65.62725105	300.5187576	129.0150032	32.54999995	171.2475052	0.2569444444	0.5631873486	0.8278811277	113	0.1463195048	0.3187103256
1	278599	282891	AT1G01770	0.5368364783	+	18	19	140.4850006	94.92225094	234.0447475	150.5800018	31.69800034	293.3139893	0.3070175439	0.290511629	0.6392252575	153	0.2974426568	0.4210878755
1	282760	284245	AT1G01780	0.560207677	+	18	11	133.9350052	22.66049991	310.7240044	97.26999664	45.51250076	183.0425034	0.3585858586	0.2752911962	0.6235528844	75	0.1454278168	0.3183299355
1	284349	291203	AT1G01790	0.1680429682	+	187	149	105.5	24.99300013	249.5339981	104.5699997	17.09800005	313.176004	0.07784517102	0.679136437	0.8908660224	13669.5	0.3837602222	0.4601478059
1	293245	295086	AT1G01800	0.1270939102	+	146	189	60.48500061	13.98250031	145.0750008	57.02999878	11.64400005	155.9130035	0.07371167645	0.7462873666	0.9203746099	13409	0.3296627353	0.4365900544
1	296000	298334	AT1G01820	0.04986517423	-	168	181	63.57999992	11.0337497	191.472998	65.29000092	13.63000011	188.7949982	0.06110234149	0.891527668	0.9760494231	14911	0.3780558148	0.4583870059
1	298450	302310	AT1G01830	0.2513809633	-	25	26	54.36999893	12.63600025	170.6600037	66.9149971	21.15749955	203.1149998	0.2123076923	0.5605560403	0.82612681	279	0.1956336396	0.357812376
1	304132	306310	AT1G01860	0.4567574709	-	50	42	118.4399986	33.24200115	231.4565052	100.795002	27.17200065	266.2387463	0.1895238095	0.3493353452	0.6829306311	931	0.1764766152	0.3434311958
1	310168	313130	AT1G01900	0.02049160948	+	23	15	49.47999954	9.622500157	133.997501	44.38000107	11.04900002	87.17800179	0.1623188406	0.9539121721	0.9959944037	156	0.3163874275	0.4311138332
1	313100	316090	AT1G01910	0.2132992799	-	103	160	73.93000031	15.05250006	230.476004	62.44000053	11.8072504	171.6432465	0.0942961165	0.6119285557	0.8566292553	7361	0.07228405884	0.2341081338
1	315982	319667	AT1G01920	0.2720038905	+	22	36	110.125	21.92099962	231.7530014	83.65499878	20.22249961	267.3687592	0.2095959596	0.5345595707	0.8097082716	344	0.2046020425	0.3648679857
1	319768	322895	AT1G01930	0.2818926224	-	17	29	95.73999786	17.50600033	148.976004	74	14.51600046	151.0400024	0.2373225152	0.5225253653	0.8012349599	188	0.09343156568	0.2619722729
1	322885	324917	AT1G01940	0.01423156653	+	40	66	69.11499786	20.15650082	142.552993	70.2100029	12.12249994	171.7037487	0.09621212121	0.9677617065	0.9994976207	1296	0.4391333701	0.480786449
1	325315	330619	AT1G01950	1.821635492	+	36	22	124.1699982	29.47374916	216.897501	50.47999954	10.40849962	224.7917458	0.4065656566	0.01507872108	0.1440007956	238.5	0.005934981393	0.05864374884
1	330587	337912	AT1G01960	0.62726742	-	72	83	98.625	40.07499914	203.9527477	88.72000122	20.35100069	188.6160034	0.1628179384	0.2359025199	0.5835335477	2521	0.0470955026	0.1888888329
1	338240	340088	AT1G01970	0.2566156055	+	60	68	75.68500137	22.27024961	155.5544945	86.72000122	15.88549993	193.272501	0.137254902	0.5538400968	0.8225313568	1855.5	0.1898129759	0.3532908021
1	342917	344400	AT1G01990	1.323964533	-	108	137	56.09499931	17.9242502	186.0187489	50.04000092	15.57200012	143.4700012	0.1730197351	0.04742807159	0.2670626046	6521.5	0.05585205243	0.2064622538
1	345515	347603	AT1G02000	0.4642412794	+	31	41	75.62000275	21.64749956	185.7749977	53.68999863	14.32999992	133.1399994	0.2155782848	0.3433671317	0.6800188066	514	0.08439936268	0.250663003
1	352611	355124	AT1G02020	0.03836261861	-	33	47	80.04000092	13.36399956	176.2640015	89.30000305	15.18400016	171.2525047	0.1225016119	0.9154558018	0.9826563827	704	0.24387062	0.3917616994
1	359116	360746	AT1G02050	0.8766481944	-	12	11	88.25	27.04225025	137.3749985	113.8600006	23.54250002	248.6874924	0.4545454545	0.1328470166	0.4496812729	41	0.0657938032	0.2239934827
1	373334	386913	AT1G02080	2.298390769	+	86	54	130.4899979	38.28375006	247.4799938	147.6750031	12.56325018	285.4782455	0.2932816537	0.005030477728	0.0701918552	1968	0.06510202511	0.2229111743
1	387276	389808	AT1G02090	1.248520464	-	80	92	79.41999817	14.07625015	188.9965023	62.2349987	13.24800007	180.699247	0.2	0.05642603533	0.2950683135	3011	0.02007261197	0.1224833816
1	389811	392816	AT1G02100	1.125359564	+	85	91	75.72000122	20.9159996	209.2050064	96	11.99000025	253.590004	0.1893988365	0.07492736086	0.3398514775	3300	0.04661136845	0.1876912459
1	392830	395528	AT1G02110	0.1251838788	+	25	50	92.41999817	21.3359993	205.2600006	85.18500137	30.09399986	284.7062431	0.16	0.7495767739	0.9217511345	601	0.3958448058	0.4647712863
1	395688	400001	AT1G02120	0.5995989969	+	97	79	67.54000092	10.29400043	243.2939972	90.93000031	17.13799958	261.7280121	0.151115751	0.2514206837	0.5994750062	3295	0.055434708	0.2056517307
1	399982	401919	AT1G02130	4.334220654	-	179	201	74.27999878	16.9779995	170.923494	50.22000122	12.10999966	147.8099976	0.2342477556	4.632115143e-05	0.001912721409	13051	1.917434771e-06	9.953540858e-05
1	403099	404456	AT1G02140	0.8239359916	-	273	530	65.73999786	13.92600002	176.4819946	58.42000008	13.7737499	174.802998	0.08397263114	0.1499905883	0.4742469437	67572.5	0.06268067512	0.2185853198
1	404599	408619	AT1G02145	0.5553034331	+	59	37	105.4199982	19.54999943	261.5900017	121.6699982	33.56099987	303.4760071	0.2020155749	0.278417524	0.6270279054	923	0.1029896271	0.2732166874
1	408621	410680	AT1G02150	0.3574481646	+	371	367	64.84999847	14.46250033	184.9449997	64.79000092	15.21600008	179.2090027	0.06327254566	0.43908827	0.7467994389	66162	0.254090104	0.3985952296
1	410743	411632	AT1G02160	0.2778359804	+	123	133	64.12000275	14.29549994	177.7889984	60.83000183	12.05600033	185.3460037	0.09970047069	0.5274290175	0.8054404015	7657.5	0.1891455999	0.3528274248
1	411663	413554	AT1G02170	0.5154350845	+	65	61	97.23000336	14.21599998	235.8839996	86.06999969	19.07499981	174.0050049	0.1684741488	0.3051862167	0.6513585722	1935	0.4092643185	0.4695994044
1	413521	414649	AT1G02180	0.5546151541	-	11	15	80.87999725	24.62000036	146.4274998	58.47000122	14.64099998	175.8835022	0.3696969697	0.2788591157	0.6275017427	61	0.1378789239	0.3108531346
1	418415	422579	AT1G02205	1.255391586	+	63	112	66.16000366	13.12850013	181.6369995	60.22500038	10.04275041	212.154998	0.2063492063	0.05554032465	0.2919633341	3179.5	0.1396773462	0.3125688016
1	440199	442972	AT1G02260	0.1991108034	-	17	23	79.19000244	27.55999985	243.6359985	105.3700027	18.95700026	223.4940018	0.2276214834	0.632250522	0.866819542	190	0.445595161	0.4833016689
1	443117	446296	AT1G02270	0.1269005724	-	32	41	90.22000122	13.67074997	220.2187504	80.30999756	13.68000031	181.75	0.1547256098	0.7466196703	0.9205290447	567	0.1625822551	0.3325735415
1	448422	450426	AT1G02280	3.78591401	-	164	259	80.25499725	19.16474986	205.8960033	62.43000031	13.27750006	178.916996	0.2136736039	0.0001637140644	0.005419416796	16319.5	2.979408051e-05	0.001056236488
1	450460	452743	AT1G02290	0.0749366716	-	40	27	72.15500259	19.73800001	216.5840042	66.69999695	12.84099956	186.7109962	0.1481481481	0.841517842	0.9573031098	506.5	0.3365727458	0.4402524172
1	453106	455519	AT1G02300	0.9153735659	+	34	12	153.4950027	80.76249857	280.9047615	181.2799988	102.4065016	328.0567451	0.3774509804	0.1215140327	0.4309923049	135	0.04330374256	0.1808778959
1	455687	458164	AT1G02305	1.905681517	+	233	269	58.41999817	12.20200024	187.123999	47.31000137	11.56200027	167.1750046	0.1410086635	0.01242563187	0.1275470051	27175.5	0.005113316918	0.05286064111
1	461945	463618	AT1G02330	0.4610639033	-	95	109	67.69000244	13.13649974	156.3835014	74.18000031	10.94399967	178.8940048	0.1288266538	0.3458884791	0.681572725	4834	0.2073883573	0.3670266374
1	463753	464981	AT1G02335	1.062462851	-	64	36	81.15999985	13.7915	191.4982494	67.08499908	20.77625084	153.6799984	0.2534722222	0.08660383996	0.3657315865	946.5	0.07049394043	0.2312411248
1	465615	467880	AT1G02340	1.896924462	-	673	800	84.80999756	11.20600033	182.4319946	79.125	9.026499748	197.9222477	0.0826615899	0.01267872371	0.1289326383	257733.5	0.07927836353	0.2435660566
1	469817	470693	AT1G02350	0.0516268766	+	99	114	105.1399994	18.62649984	231.5204987	112.6949997	18.31099977	258.0862465	0.07841573631	0.8879185382	0.9749516676	5543	0.4122396289	0.4710393314
1	474372	476612	AT1G02370	1.070657146	+	25	23	58.33000183	31.26000061	133.5559998	68.69000244	10.15150023	146.745507	0.347826087	0.08498511249	0.3624585123	256	0.2611627538	0.4021560153
1	486799	489651	AT1G02400	0.04164774912	+	50	14	98.11500168	23.85850019	180.2762531	114.7700005	24.16175056	209.1430019	0.1628571429	0.9085571509	0.9813389454	309	0.2553595697	0.3994888973
1	490859	492979	AT1G02410	0.1922220202	+	66	43	98.15999985	12.88624978	195.9900017	88.20999908	24.35199938	221.0040001	0.1412966878	0.6423592462	0.8717732627	1406.5	0.4703462315	0.4908797641
1	493638	495158	AT1G02420	0.3712087462	+	21	13	66.26000214	12.46499968	105.6450005	70.90000153	28.3279995	109.2030029	0.293040293	0.4253938959	0.7394283996	112	0.1975169408	0.3594647651
1	513698	515422	AT1G02475	0.8110017669	-	186	185	94.11500168	13.30124986	217.8999977	81.84999847	15.98800011	230.2040039	0.1158965417	0.1545248153	0.4812480949	15395.5	0.0399280295	0.173534679
1	518090	520495	AT1G02500	2.857334399	+	1601	1290	51.25999832	13.22000027	153.9199982	47.34500122	11.64349999	150.529998	0.07101424013	0.001388882804	0.02772996092	963933	0.001035503235	0.01796066769
1	537739	540127	AT1G02560	2.216647921	+	755	882	80.41999817	19.43800077	173.7090019	84.73500061	16.52075043	202.7010014	0.08389121653	0.006072284049	0.08009133272	309793.5	0.007563759325	0.0684265037
1	553018	556152	AT1G02610	0.25596469	-	46	33	92.06000137	8.278750122	249.880003	69.26999664	8.274000263	186.2079956	0.1752305665	0.5546708082	0.8225313568	669	0.186819445	0.3510258975
1	564017	567771	AT1G02640	0.2832711068	+	30	48	77.24000168	25.83300042	132.8097549	82.42499924	12.01199985	200.0250019	0.1833333333	0.5208694586	0.7994720096	684	0.3577026507	0.448981695
1	571825	575085	AT1G02660	0.1738117608	-	77	51	87.76000214	20.25299921	167.0680054	81.51999664	20.65999937	173.0675011	0.127578304	0.670175025	0.8856254194	1887	0.3557302212	0.447842562
1	580624	582310	AT1G02680	1.687265974	+	34	37	89.98500061	17.00975065	170.7012489	69	19.2340003	143.4210007	0.3473767886	0.02054631898	0.1715362838	492	0.05807430204	0.2113974406
1	584133	587327	AT1G02690	0.5602429043	+	20	20	101.0550003	33.61150017	219.2764942	77.12999725	15.23949955	180.0667461	0.3	0.2752688673	0.6235528844	136	0.04292743998	0.18022829
1	589583	590406	AT1G02705	0.386613561	+	13	16	65.58000183	26.43699989	141.3270027	52.89500046	16.45499969	104.0875015	0.3125	0.4105692686	0.7271972214	75	0.1056849054	0.2761779661
1	591681	594264	AT1G02720	0.6069798684	+	32	26	68.59000015	12.47100031	195.3734947	75.11999893	14.61874986	145.590003	0.2596153846	0.2471838724	0.5945031766	384	0.3111773695	0.4282703405
1	594501	598657	AT1G02730	0.1785503171	-	18	11	63.23999977	24.73549967	144.0507473	49.29000092	16.58250046	111.1775017	0.2626262626	0.6629025397	0.8804978903	83	0.2430036699	0.3911417866
1	599329	602199	AT1G02740	0.04482176357	-	28	23	114.4399986	30.3147501	176.6714993	115.7099991	45.74300041	176.7039986	0.1537267081	0.9019412224	0.9789454072	309	0.4064748334	0.468988732
1	602488	604387	AT1G02750	2.131786347	+	51	48	110.4199982	16.17499995	233.7099991	64.61499786	14.98975029	178.572998	0.3272058824	0.007382673339	0.08994732354	782	0.0009969888133	0.01747318749
1	607798	609534	AT1G02780	9.828113994	-	1849	3227	61.11000061	12.42399998	165.5280029	50.54999924	11.63300018	158.6239952	0.09924626969	1.485545665e-10	1.741323084e-08	2631033	1.171376061e-12	1.606221797e-10
1	621452	623054	AT1G02816	1.006743166	+	75	73	67.08000183	21.85600014	165.7705002	51.31000137	16.18799934	151.2199982	0.197260274	0.09845932055	0.388597325	2420	0.1120289849	0.283729479
1	623655	624567	AT1G02820	0.5732518448	-	82	214	55.72999954	11.71649959	176.2565041	67.43499756	16.74574928	171.8972507	0.1279917939	0.2671456797	0.6151737662	7886.5	0.08916250458	0.2570396711
1	626638	629993	AT1G02840	0.5864666917	+	208	244	88.53499985	14.81700027	319.1852562	79.35499954	12.35599973	276.122496	0.09418348045	0.2591393161	0.6075145097	23921.5	0.1467533689	0.3192511503
1	630373	633420	AT1G02850	0.8744366045	+	265	87	77.12000275	14.57999992	264.902002	99.91999817	15.42099981	276.1674957	0.1414009976	0.1335252487	0.4507174848	10169	0.04957385198	0.1938020276
1	635143	637262	AT1G02860	0.002258315013	+	28	67	78.00499725	16.42474999	190.7679996	77	12.54350004	174.8030037	0.09115138593	0.9948135339	0.9999976789	909	0.4080203613	0.4695994044
1	637213	638681	AT1G02870	0.008730740247	-	85	95	61	16.38800049	137.5689941	56.63999939	11.6874999	152.898999	0.06873065015	0.9800974511	0.9999976789	3973	0.427248522	0.4763859819
1	642504	644903	AT1G02880	0.3953476697	-	26	39	116.0100021	31.79875016	219.2024994	128.3300018	22.60650024	185.4675018	0.2179487179	0.4023947726	0.7215731617	498.5	0.4573445573	0.4867469532
1	645083	652001	AT1G02890	1.212248828	-	107	80	98.83000183	19.22950068	227.3769981	83.05500031	9.78875041	256.8899937	0.1912383178	0.06134104531	0.3088183418	3705	0.05834842417	0.2117784926
1	653603	654457	AT1G02900	1.430341415	-	40	28	53.45499992	14.6877496	187.2149948	36.91499901	13.87875004	138.1892492	0.3357142857	0.03712432659	0.235840073	404	0.02632966632	0.1394165518
1	655567	658216	AT1G02910	0.795964018	-	112	156	101.8699989	24.023	226.7084988	91.49499893	9.542499542	255.0987549	0.1369047619	0.159969056	0.4887849966	8013.5	0.1243183398	0.298327071
1	658577	659980	AT1G02920	0.03907560396	-	1460	17	73.83000183	21.73999977	190.6077488	75.76000214	28.57400055	131.0279968	0.1315471394	0.9139541223	0.9826336944	12066.5	0.4222360624	0.4749211866
1	661087	662475	AT1G02930	0.1515728676	-	1497	22	53.65000153	11.1880003	158.6219971	58.23000145	12.31775031	136.7154976	0.146565859	0.7053864816	0.9042060597	15964.5	0.4029254314	0.4674859893
1	665118	666471	AT1G02950	0.2841034127	-	12	11	82.11500168	21.41674972	176.8224979	60.31000137	39.77499962	164.0199947	0.3181818182	0.5198721917	0.7987954972	56	0.2793799114	0.4115159759
1	666806	669919	AT1G02960	0.8242570653	-	36	35	146.8150024	33.81000042	304.2587624	126.6800003	13.90050037	342.8515045	0.2611111111	0.1498797412	0.4739995733	507	0.07943475782	0.2436659451
1	681330	687385	AT1G02990	0.2801872377	-	36	42	99.57500076	16.35000038	202.0099945	108.5849991	28.41799965	220.812244	0.1785714286	0.5245812484	0.8031165416	655.5	0.1580959084	0.3291211727
1	687794	692660	AT1G03000	0.05554984444	-	41	46	126	38.40000153	283.7799988	124.2749977	20.74249935	289.7587624	0.1224814422	0.8799341149	0.9723897484	935	0.4745753216	0.4927108785
1	701364	703929	AT1G03030	0.3412906956	+	27	30	87.44000244	17.46500049	253.451001	98.35000229	38.36924896	223.0045055	0.2185185185	0.4557317692	0.7592047295	379	0.3418043135	0.4427375771
1	703846	706689	AT1G03040	0.1955441832	-	75	72	79	10.598	229.5764992	80.5	9.463749743	212.4432415	0.12	0.6374642249	0.8695816751	2561	0.2957455116	0.4202810681
1	710017	711857	AT1G03055	0.002170485977	-	14	19	101.5399971	31.59500003	205.7934998	109.7699966	21.83900061	272.1580055	0.1390977444	0.9950147392	0.9999976789	126	0.4064182416	0.468988732
1	712439	727553	AT1G03060	0.6569727557	-	30	29	114.7150002	31.15249925	235.5915009	99.69000244	30.19900036	188.5290054	0.2632183908	0.2203064662	0.5664262977	363	0.13916462	0.3121058095
1	731553	738306	AT1G03080	0.01890468878	-	20	28	77.90499878	29.71575027	140.5212507	74.4600029	14.59100051	144.3195019	0.1428571429	0.9574041623	0.9972908587	267	0.3968913325	0.4653916832
1	739543	744184	AT1G03090	0.2838030602	+	111	158	103.2200012	13.71499991	244.9724998	106.4399986	12.97749999	245.5980022	0.09927015623	0.5202318529	0.799060323	8446	0.3038387918	0.4241233832
1	748100	749034	AT1G03106	0.4588526061	-	35	24	68.04000092	38.80249987	167.799501	55.89500046	39.58549891	123.1402508	0.2380952381	0.3476541307	0.6819307068	346	0.1283700899	0.3016748999
1	749245	751976	AT1G03110	1.270955632	+	51	53	89.68000031	26.90000057	198.7124939	62.04999924	15.00500002	193.5400055	0.2567517573	0.05358513977	0.2868729306	1048.5	0.02459227249	0.1346322714
1	753306	754262	AT1G03130	5.766960386	-	5269	5460	53.90999985	10.87399998	135.2779999	49.88500023	10	144.3065006	0.05092270291	1.7101713e-06	0.0001016880484	13554270	1.135912877e-07	7.504769848e-06
1	754260	756303	AT1G03140	0.985962914	-	114	150	70.31999969	13.63425014	167.0889957	61.80000114	13.86524971	165.3217514	0.1487719298	0.1032849601	0.3965116825	7724	0.08958050057	0.2575744767
1	756413	758678	AT1G03150	0.1548166567	+	47	71	63.18999863	12.29100037	199.9969948	72.91999817	10.21499968	205.3325005	0.1294575966	0.7001375062	0.9024118695	1520.5	0.2087305562	0.367834461
1	761260	766194	AT1G03160	2.141154366	+	77	66	120.0599976	20.17300053	241.5779938	98	19.57625055	241.7624989	0.2748917749	0.007225129473	0.08869700751	1909.5	0.005306533404	0.05462497382
1	775526	780062	AT1G03190	0.2483016936	+	20	17	103.0600014	12.67499976	222.5205006	82.15000153	22.56799984	209.7699982	0.2470588235	0.5645446634	0.8281681962	145	0.2276330793	0.3810806682
1	782903	784346	AT1G03210	0.104527013	+	28	22	122.6049995	17.25625	292.4912582	133.8550034	20.81050053	223.1935009	0.1785714286	0.786091295	0.9351682236	303	0.4649588641	0.4889800901
1	786831	788722	AT1G03220	0.9439600902	+	334	126	57.42499924	14.70775003	153.0672447	53.92000008	14.87124991	126.4925003	0.123467351	0.1137731834	0.4156003624	18876.5	0.04431154247	0.1829739403
1	789819	791689	AT1G03230	0.6612754943	+	67	47	53.04000092	14.31499996	133.9249996	42.45999908	12.13050008	123.9285007	0.1949825341	0.2181345738	0.5642605058	1388	0.1421518864	0.3155433214
1	793314	795403	AT1G03250	0.03864523562	-	72	110	78.45999908	13.94100006	186.3264938	85.52999878	15.42975013	193.1237499	0.08282828283	0.914860263	0.9826336944	3837.5	0.3627773725	0.4510868603
1	795448	798491	AT1G03260	0.04890015538	-	29	31	80.31999969	17.31399965	168.1239975	80.37000275	13.47249961	184.9524994	0.1434927697	0.8935108789	0.9764797463	442	0.4587638212	0.4867713254
1	802969	807066	AT1G03280	0.04959680263	+	67	84	92.97000122	21.34800062	235.4265015	94.52000046	23.1387506	188.3445015	0.09257285004	0.8920787564	0.9760494231	2731.5	0.3793765783	0.4587934575
1	807360	813216	AT1G03290	0.4746764062	+	51	37	104.6299973	18.125	243.220005	72	14.39500017	178.3689941	0.1976682565	0.3352151157	0.671450497	785	0.09084487965	0.2595185389
1	813412	816812	AT1G03310	0.1669542717	+	51	74	75.80999756	27.71249962	145.8249969	80.43000031	22.60374975	199.8065071	0.1274509804	0.6808410429	0.8918551332	1830	0.3882715284	0.4625083319
1	817933	819563	AT1G03330	0.6288661085	-	91	155	53.47000122	12.89499998	139.6999969	61.20999908	14.55899997	174.5474945	0.1342077278	0.2350357316	0.5827779527	6576.5	0.1887578141	0.3525112204
1	822581	824410	AT1G03350	0.3890506725	-	117	113	64.20999908	12.83600006	138.3509933	53.68000031	10.79000015	135.5359955	0.1151955223	0.4082717473	0.7255446689	5981.5	0.1064137758	0.276892988
1	824516	826399	AT1G03360	1.132429333	+	39	33	95.72000122	18.1429997	201.5619942	67	17.34200058	167.0019989	0.2937062937	0.07371751157	0.3367328821	489	0.04089033648	0.1756558399
1	826522	830393	AT1G03365	0.07699762478	+	26	28	91.07999802	23.72000027	154.0900002	86.96500015	14.2757498	196.0264973	0.1620879121	0.8375338627	0.9552381273	361	0.4827393122	0.4952089704
1	830549	835411	AT1G03370	0.3065871304	+	38	18	102.4900017	13.16650007	192.0365017	92.41999817	18.29824991	258.8659908	0.2280701754	0.4936428711	0.7845070075	338	0.475518929	0.4930900872
1	835766	841373	AT1G03380	0.9799554805	+	63	73	95.87000275	17.96650047	201.693499	80.36000061	19.27199993	218.2799927	0.203957382	0.1047235895	0.3999362514	1907	0.04356430846	0.181502077
1	842658	844251	AT1G03400	0.347688164	-	56	80	71.43000031	10.11249995	178.2762508	67.34500122	11.69649982	177.7264935	0.1464285714	0.4490677178	0.7557252841	1923	0.08083534232	0.2456869894
1	844435	847683	AT1G03410	0.3903028843	-	36	62	79.60499954	12.20124996	155.2650013	86.77500153	22.61774948	176.8430019	0.1810035842	0.407096263	0.7247849317	909	0.0640346918	0.2209093389
1	845676	847683	AT1G04183	0.399457542	+	52	70	68.20999908	7.51025008	192.6177517	65.69499969	14.08149955	230.435004	0.1598901099	0.3986047392	0.7193873589	1666	0.2133976042	0.3707990649
1	846663	847739	AT1G03420	0.5231332434	+	53	74	67.41999817	7.543000078	192.2530014	65.69499969	13.25249958	230.4150043	0.1708312086	0.2998242504	0.6470709457	1792	0.205020892	0.3650145351
1	847792	849621	AT1G03430	0.5838943707	+	54	69	122.0299988	14.79875033	345.8707382	88.76999664	21.24400024	220.013002	0.1787439614	0.2606787497	0.6090705989	1644.5	0.1332833543	0.3065453431
1	852150	854297	AT1G03440	1.357566631	+	61	88	68.61000061	22.61000061	127.5800018	54.43000031	12.22574992	135.5484962	0.2250372578	0.04389685124	0.2564472398	2234	0.04134586995	0.1762494939
1	860760	864372	AT1G03457	0.7849790947	-	13	19	107.0699997	20.54700012	157.3089981	58.72000122	12.60000038	154.1365013	0.3805668016	0.1640668747	0.4944457856	82	0.05782581913	0.2108097018
1	868852	871308	AT1G03475	0.04516115406	-	295	298	83.33000183	22.11449986	216.1199982	87.69499969	17.28099942	233.3822506	0.04633147537	0.9012366528	0.9789454072	43877	0.4851819794	0.4962088426
1	877860	880259	AT1G03520	0.001366398756	-	31	38	101.4599991	15.76499987	182.239994	99.91500092	20.83775027	261.0805054	0.09422750424	0.9968586948	0.9999976789	577	0.4448322083	0.4830148026
1	880383	883599	AT1G03530	0.8381973637	-	39	37	82.19000244	13.95500031	177.7610069	82.62999725	11.39700036	151.9059998	0.2543312543	0.145145186	0.4672614128	639	0.1970600324	0.3590207534
1	890154	892492	AT1G03560	0.0384102739	-	25	17	89.31999969	27.81400032	154.0240021	95.15000153	29.03200073	162.097998	0.1670588235	0.915355354	0.9826563827	205	0.4288219452	0.4768800998
1	894237	897718	AT1G03590	0.5879010143	-	56	45	84.90999985	20.74625015	172.9937477	70.87999725	12.03999996	132.6349953	0.1968253968	0.2582848814	0.606976329	1011.5	0.04508454874	0.1842811912
1	898479	899794	AT1G03600	1.153605267	+	2070	2717	56.125	13.83699992	143.2709946	55	12.53199997	149.9970062	0.03761928384	0.07020931462	0.3302750494	2725019.5	0.03302136307	0.1569236375
1	900731	903070	AT1G03610	0.2470439667	+	99	199	93.87999725	17.68199964	204.0074966	87.41000366	16.78999949	205.1544937	0.09517283387	0.5661819675	0.8296657826	9395.5	0.2582655357	0.4007568657
1	907522	909650	AT1G03630	1.127144724	+	394	675	76.45500183	15.11299989	186.5354988	69.31999969	14.58700008	180.3274971	0.08064673811	0.07462000546	0.339258696	122008	0.01216138819	0.09144634113
1	910022	911292	AT1G03650	0.4671876359	-	22	28	49.375	18.81300068	172.8802509	55.09500122	21.17974977	170.8685043	0.2564935065	0.3410455319	0.6785895696	248.5	0.1244288706	0.2984444941
1	916771	918064	AT1G03680	0.4788593132	-	1060	1422	66.57500076	16.68025041	166.1412533	68.04499817	14.35174978	177.2044991	0.0382082106	0.3320019899	0.6696811174	734276.5	0.1362025892	0.3094739149
1	918284	920592	AT1G03687	0.7029655566	+	26	30	84.54499817	11.60625017	150.4337463	55.56999969	14.03374972	137.2694988	0.2769230769	0.1981684185	0.5411192866	324	0.1409442803	0.3141099532
1	930714	931985	AT1G03730	0.1966796854	-	35	26	65.15000153	14.40350032	130.7815033	61.22499847	15.37375021	131.1800003	0.1857142857	0.635799694	0.8683758491	443	0.4334037451	0.4790147848
1	933425	937152	AT1G03740	3.596416598	+	56	46	111.6800003	28.79499984	208.7374954	68.15499878	13.42250001	193.6187458	0.4099378882	0.0002532697967	0.007782825569	826	0.0009557916398	0.01694198961
1	941061	943377	AT1G03760	0.6463064632	-	12	21	70.67499924	35.20600061	192.7580006	49.38999939	14.96500015	143.1800003	0.3571428571	0.2257841945	0.5718624041	94	0.1192273877	0.29263257
1	959789	960916	AT1G03820	0.1037701819	-	26	32	58.46500015	18.86500001	120.776248	60.43499947	15.16925044	121.3417534	0.1658653846	0.7874623854	0.9354937288	372	0.2482109367	0.3943771588
1	961683	966790	AT1G03830	0.3753250252	-	11	16	81.11000061	53.40500069	162.6699982	124.5699959	20.34250021	176.4350052	0.3238636364	0.4213810246	0.7365932883	77	0.3021813573	0.4232109582
1	975870	977911	AT1G03850	0.1366122152	-	63	31	44.24000168	13.17999983	172.5020027	50.06000137	2.834999919	166.2799988	0.1464413722	0.7301091392	0.9146331221	959.5	0.4472160636	0.4838682064
1	979306	982002	AT1G03860	0.1423508	-	161	174	69.45999908	17.67000008	183.3800049	60.80999947	13.8462503	194.9777451	0.07485542943	0.7205252421	0.9109318729	13172	0.173035759	0.3402999718
1	982380	983544	AT1G03870	4.536057422	-	553	858	44.52000046	9.686000061	142.223996	34.27499962	8.414249945	127.8164972	0.1278110076	2.910332295e-05	0.001297597543	199823	2.76128539e-07	1.693471863e-05
1	991105	993126	AT1G03900	0.03630506262	+	179	199	53.56999969	11.86850014	184.459005	55.02999878	12.36499963	230.5635002	0.05620280172	0.919803245	0.985212982	17726	0.4684387909	0.490378591
1	996075	1000629	AT1G03910	0.4502527729	+	58	66	83.54000092	11.40525005	203.4754993	71.06999969	14.00750017	180.9587555	0.1630094044	0.3546069369	0.6867317973	1826	0.3306257682	0.4372346048
1	1004687	1008370	AT1G03930	0.01792314088	+	75	99	107.4199982	13.48700013	238.671994	91.68000031	10.93300023	232.0429985	0.07595959596	0.9595704361	0.9976858763	3514	0.2736829824	0.4074088898
1	1011150	1013365	AT1G03950	0.1362567893	-	29	23	74.33999634	25.50399952	205.2809967	67.97000122	18.11699958	172.585495	0.1844077961	0.7307069038	0.9148785294	291	0.21951909	0.3755985842
1	1013642	1017957	AT1G03960	0.1860031989	+	15	16	171.2100067	72.53900032	318.4265015	160.1900024	32.25749922	248.0074959	0.25	0.6516235944	0.8748746804	102	0.2445477239	0.3920261572
1	1018099	1019247	AT1G03970	0.5188114543	+	49	35	52.38999939	9.794000244	152.226001	68.26000214	11.96999974	156.1050034	0.2081632653	0.3028227825	0.6495874712	757	0.1821250882	0.347860223
1	1027852	1029119	AT1G04000	0.132067272	-	54	81	67.85000229	34.17499847	154.624754	63.34999847	21.20000076	143.1699982	0.1172839506	0.737789938	0.9177387034	2081	0.3178056118	0.43182175
1	1036492	1040262	AT1G04020	1.48588854	+	22	11	101.4749985	38.87099972	180.573	64.15000153	22.11249995	177.1849995	0.5	0.03266716601	0.221050865	71	0.02935370422	0.1470720754
1	1042361	1043887	AT1G04040	1.842850467	-	128	207	57.43499947	12.1904999	148.7374969	41.45999908	11.11600003	154.0654953	0.1740640097	0.01435983774	0.139054125	10618.5	0.001135621077	0.01915576453
1	1050504	1051194	AT1G04070	1.481115498	-	56	66	48.87000084	10.36374998	149.1862488	63.97999763	17.8550005	135.6124954	0.2537878788	0.03302816927	0.2225356882	1541	0.05765996931	0.2106312328
1	1051311	1056827	AT1G04080	0.7194778366	+	136	129	119.7800026	13.14999998	336.6050072	94.93000031	11.95800037	318.8599976	0.1310419517	0.190775308	0.5331297445	7829	0.06534869621	0.2234399669
1	1059469	1061209	AT1G04100	0.1332165976	+	11	11	104.1500015	41.39250183	178.2075005	88.70999908	36.32250023	163.6324997	0.2727272727	0.7358400173	0.917039754	51	0.2772652032	0.4101136965
1	1064263	1071080	AT1G04120	1.062281717	-	61	53	101.9300003	17.18500042	217.1399994	124.9199982	47.28199883	221.3620041	0.2291988865	0.08663996789	0.3657600736	1301.5	0.03699008651	0.1662495076
1	1073273	1075568	AT1G04130	0.009539582937	+	11	13	62.86000061	24.3475008	210.4975052	90.02999878	24.20500011	161.9490036	0.1818181818	0.9782737878	0.9999976789	70	0.4768995863	0.4933970736
1	1075542	1080630	AT1G04140	3.043071322	-	141	204	103	13.14500046	192.034996	77.53499985	16.01725028	209.6014999	0.2118272841	0.0009055838686	0.01988317452	11570	0.001010223844	0.01756411911
1	1096881	1099901	AT1G04170	0.6990165241	+	175	265	85.47000122	22.80999994	232.4245056	77.41999817	14.39400024	194.3519989	0.103180593	0.199978578	0.5436311061	20498.5	0.0197282457	0.1214527959
1	1104492	1106241	AT1G04180	0.8458534343	+	51	42	91.80000305	14.06000018	145.7324944	64.72999954	12.7157496	144.0607517	0.2324929972	0.1426088789	0.4649663649	835	0.03452758931	0.1606975698
1	1106353	1108725	AT1G04190	0.1155216485	-	67	83	74.19000244	17.24849968	190.0630058	67.16999817	16.81449976	158.3785019	0.1069951448	0.7664403341	0.9287428465	2594	0.2409858465	0.3897984954
1	1109394	1114155	AT1G04200	0.8066243166	+	22	19	164.125	42.95825062	260.9292576	84.80999756	14.19549985	289.9989899	0.3373205742	0.1560902166	0.4830048914	140	0.03665564083	0.1658231371
1	1114374	1119739	AT1G04210	0.1967877102	+	72	64	110.3050003	22.2314997	219.0682564	111.9049988	13.99199998	231.1315029	0.125	0.6356415673	0.8682725337	2243	0.3959776216	0.4647712863
1	1125514	1128788	AT1G04230	0.3635397563	+	24	22	79.27999878	35.87949991	205.9032497	84.83499908	13.26725035	161.8582523	0.2462121212	0.4329724306	0.7443648189	215	0.1430957263	0.3163821694
1	1128148	1129689	AT1G04240	1.461719223	-	223	324	86.13999939	18.97099991	169.9139977	81.81000137	15.84174993	193.6857449	0.1225710015	0.03453669516	0.2281070708	33243	0.05626960646	0.2074254958
1	1136077	1138663	AT1G04250	1.561293935	+	153	426	46.5	9.707999992	173.9819946	36.75500107	10.27000022	134.2712498	0.1363343459	0.02746034977	0.2020510853	27728	0.003086334627	0.03857254841
1	1140277	1141564	AT1G04260	0.1288755865	-	91	91	58.88000107	11.84499979	114.8474998	47.93999863	16.55750036	141.1574974	0.0989010989	0.743232023	0.91923736	3820	0.1839325374	0.3491523353
1	1141557	1143130	AT1G04270	18.51502188	-	1075	2052	65.62000275	13.23549981	158.2574982	46.59000015	11.7154999	160.2872448	0.1744226846	3.054767223e-19	9.86689813e-17	877655.5	2.850791373e-21	8.287250523e-19
1	1143435	1147091	AT1G04280	1.67735464	-	115	85	79.26999664	18.04249935	193.9154953	52.38000107	9.496000385	168.3569962	0.2117647059	0.02102061218	0.1736978954	3834	0.004629618082	0.0495884295
1	1147296	1148533	AT1G04290	1.404493224	-	67	80	85	12.01350007	183.6200012	56.79500008	11.98800001	174.7082439	0.2268656716	0.03940095749	0.2408544613	2085.5	0.01043632617	0.08353083752
1	1148563	1154667	AT1G04300	1.97084249	-	65	65	102.5400009	38.13600006	194.8659973	83.31999969	13.51000023	201.2599976	0.2769230769	0.01069442674	0.1154564338	1682	0.02263096429	0.1292322923
1	1154739	1157813	AT1G04310	0.430218221	-	34	38	70.46999741	13.46899991	138.6497547	88.76499939	12.05149992	171.9305046	0.2089783282	0.3713485898	0.6999807745	534	0.1042505374	0.274706592
1	1162904	1164861	AT1G04340	0.117351399	-	39	98	76.12000275	20.52450066	169.1414932	75.77500153	14.12400012	146.9877506	0.1232339089	0.7632179942	0.9273305636	1891	0.4629468115	0.4880281335
1	1164909	1167135	AT1G04350	0.8147899845	+	258	244	77.5150032	14.79524999	215.030751	69.94499969	12.07649972	198.2352501	0.1000444783	0.1531828042	0.4788197976	28765.5	0.04762920379	0.190211813
1	1179309	1183704	AT1G04390	0.8032151294	-	15	21	132.6199951	44.05700097	234.1639984	109.0899963	28.56000042	200.1500015	0.3619047619	0.1573203379	0.4840497696	104	0.0445060531	0.1831527412
1	1185511	1188696	AT1G04400	1.305287584	-	205	262	72.70999908	15.70599966	181.7279999	70.22999954	13.92049985	183.1515003	0.1252839322	0.04951222191	0.2735310321	24966.5	0.09603249786	0.2645626149
1	1188994	1191458	AT1G04410	7.017440771	-	1551	1590	72.59999847	18.09250069	181.7875023	63.25	15.61724982	175.8952435	0.1031373551	9.606368214e-08	7.234640517e-06	1082946.5	1.743258677e-09	1.517261369e-07
1	1191518	1193884	AT1G04420	0.1408028232	+	274	313	61.57999992	12.24775012	165.6202518	64.11000061	12.54599991	197.7380005	0.05671509526	0.7230980274	0.9121789227	41100.5	0.1926124413	0.3553270509
1	1197955	1201579	AT1G04430	2.823026488	+	167	354	70.69999695	12.00299964	187.7615044	54.95499992	11.3109997	185.7920044	0.1758855171	0.00150305029	0.02920905957	24451.5	0.0007246510706	0.01373246846
1	1202159	1206009	AT1G04440	0.2015804631	+	92	84	115.9599991	20.43350067	224.1535057	112.0600014	15.37475028	226.7947437	0.1107660455	0.6286653685	0.8654581982	3790	0.4138315601	0.4714352007
1	1215924	1217471	AT1G04480	6.269413314	+	479	903	72.58999634	12.43599958	170.2915054	53.47999954	10.91899986	178.2314972	0.1543636729	5.377577601e-07	3.536791422e-05	179699	1.112891933e-07	7.386248514e-06
1	1226482	1230947	AT1G04510	0.6134359093	+	115	133	91.47000122	20.39400034	189.6204941	81.56999969	12.60199986	187.035997	0.1284079765	0.2435365171	0.5909605103	6740	0.05369985673	0.2025239796
1	1231451	1234032	AT1G04520	0.2080176802	+	33	27	75.38999939	15.02199955	152.4560028	76.95999908	20.98000054	176.2540009	0.1885521886	0.619415858	0.8608552029	427	0.3945573811	0.4645329108
1	1234175	1236206	AT1G04530	0.9239711321	-	125	186	83.12000275	15.20500011	174.3360031	66.51999664	12.20875013	200.5912552	0.1352688172	0.1191321194	0.4268142359	10571	0.08771000851	0.2552233953
1	1240293	1242157	AT1G04550	0.1328422592	+	111	102	72.5	12.77749991	187.7100067	76.39500046	12.83625002	211.4467525	0.09220985692	0.736474545	0.9172013976	5617	0.4614393964	0.4873580604
1	1242505	1244244	AT1G04555	0.3787608028	+	21	18	67.40000153	9.589999914	123.8050003	44.84500122	4.032000071	113.1027483	0.2698412698	0.4180605593	0.7344877362	137	0.07341107605	0.2356514996
1	1244946	1246059	AT1G04560	1.012197534	+	20	34	71.68499756	20.96500041	169.5917542	51.59000015	9.8230003	163.464003	0.3323529412	0.09723048804	0.3862380825	296	0.2179335255	0.3746497686
1	1258555	1261470	AT1G04590	1.520867244	-	51	60	96.87000275	33.31250095	173.9550056	81.16500092	15.80875018	223.8150021	0.268627451	0.03013927186	0.2109246305	1259	0.0547301949	0.2043228876
1	1282162	1286619	AT1G04620	0.01121009931	-	32	15	62.8049984	24.96349931	186.563504	58.90999985	18.41450019	212.3260025	0.14375	0.9745180796	0.9999976789	223.5	0.3574963876	0.4488390769
1	1289733	1291112	AT1G04630	0.0002082180623	-	123	140	62.09999847	12.91049962	182.7799934	63.15999985	17.08750019	153.3872494	0.04361207898	0.9995206751	0.9999976789	8537.5	0.4534386637	0.4853547012
1	1291299	1292024	AT1G04635	0.09815795011	+	13	15	62.5	9.409999943	187.504007	67.73999786	13.11650009	90.19100304	0.2307692308	0.7977045145	0.9381531773	96	0.4816290841	0.4947312218
1	1292022	1293398	AT1G04640	0.385268432	+	113	139	75.70999908	18.14200058	169.9880005	66.73999786	11.35499988	143.5759987	0.1103966384	0.4118428855	0.7284176613	7256	0.1497681129	0.3214166045
1	1303466	1307973	AT1G04680	2.213288184	-	114	127	62.32999992	12.91625004	191.7869942	44.43999863	11.0965004	164.3959961	0.2157756596	0.006119441901	0.08049419731	5418	0.0003770067052	0.008469540125
1	1313442	1315823	AT1G04690	1.373595092	+	310	335	71.15999985	17.02075047	179.3745014	58.58000183	11.51750007	168.9520035	0.1083293211	0.04230628671	0.2511935774	46796.5	0.01504898546	0.102500939
1	1321884	1324840	AT1G04710	1.721110653	+	32	47	119.2250023	16.51600013	279.7282394	73.05000305	12.96850047	201.3960052	0.3384308511	0.01900593971	0.1639512644	532	0.01418689513	0.09913775035
1	1331465	1333651	AT1G04750	0.5221517043	-	244	341	76.32499695	16.58899999	175.5767544	69.91000366	15.24000025	209.0749969	0.08068121725	0.3005026428	0.6470709457	40420	0.2788897294	0.411186134
1	1336273	1337849	AT1G04770	0.4012739806	-	32	39	90.63999939	23.45675082	182.6832447	76.80000305	13.69350038	192.5644989	0.2067307692	0.3969410548	0.7182295819	492	0.06429980746	0.2213637379
1	1340552	1343793	AT1G04780	0.3044511833	-	90	76	66.72999954	10.26725023	141.8589977	57.34499931	10.81124961	136.6750031	0.1266081871	0.4960766856	0.7863113005	3020	0.09768455043	0.2666375475
1	1344988	1348868	AT1G04790	0.05372763681	+	55	39	109.6800003	19.91899967	189.1739998	102.6699982	16.38150015	232.0195076	0.1188811189	0.8836338883	0.9734471952	1029.5	0.3721587615	0.4556776619
1	1348451	1349478	AT1G04800	0.01672033068	-	165	165	49.20000076	13.49100027	121.7830025	50.90000153	10.93300037	117.9569969	0.05454545455	0.96223172	0.9984321852	13583.5	0.4868819367	0.4968003445
1	1350079	1355466	AT1G04810	0.4095257098	+	73	71	98.45999908	10.63999996	203.5819946	87	20.9649992	200.3925018	0.1470191009	0.3894702508	0.712265843	2247.5	0.08493875885	0.251391745
1	1356083	1358547	AT1G04820	0.147388271	-	788	1073	78.34000015	21.78150005	180.0232502	77.55999756	22.58600044	192.5499969	0.03262119112	0.7122160051	0.9074364831	419125.5	0.3754548577	0.4576063337
1	1358573	1362019	AT1G04830	0.7274288037	-	33	44	119.3199997	24.97800026	240.55	85.84999847	11.14700022	201.0695023	0.2424242424	0.1873144133	0.5273869209	541	0.02877320714	0.1453299781
1	1365106	1368940	AT1G04850	0.1240444548	-	158	142	67.67000198	9.788250422	204.7317482	65.33499908	9.876499891	194.3247498	0.07692993403	0.7515459611	0.9222419563	10968	0.3697229626	0.4543259585
1	1369035	1373103	AT1G04860	0.4949627617	-	67	72	90.91999817	14.53200035	218.5154961	82.32500076	17.85774977	166.1600014	0.1585820896	0.3199169409	0.661751985	2028	0.05298805498	0.2009343541
1	1373233	1375821	AT1G04870	0.02421062893	-	59	87	82.90000153	23.13999939	173.7019974	78.56999969	16.86349993	186.419001	0.08649912332	0.9457783561	0.9938467616	2483	0.3703232727	0.4546025899
1	1383840	1387895	AT1G04900	0.06817633784	+	26	30	76.38999939	23.7662499	176.232502	66.42500114	21.16550078	290.4175049	0.1564102564	0.8547195982	0.9625471145	385	0.470533198	0.4909691337
1	1387870	1391381	AT1G04910	0.4095150596	-	52	50	110.5850029	15.00250022	241.8309982	82.82499695	11.02399988	179.2250004	0.1738461538	0.3894798019	0.712265843	1081	0.07178269799	0.2332032224
1	1396264	1399122	AT1G04930	0.3209651606	-	11	14	84.91000366	28.38249922	121.7075005	59.33000183	17.99324992	132.0152451	0.3181818182	0.4775675829	0.7743807223	67	0.3015051436	0.4230153612
1	1399173	1403112	AT1G04945	0.1631025463	+	164	240	84.38499832	30.2807507	182.5597515	89.01499939	20.18874948	211.1900017	0.07144308943	0.6869062274	0.8953620317	18946	0.2622552097	0.4024426311
1	1399181	1400830	AT1G04940	0.01634480337	+	145	226	87.65000153	30.30800018	186.3159973	88.06499863	22.7012496	212.7299995	0.05260909368	0.9630641058	0.9988680446	16346.5	0.4849626341	0.4960194136
1	1403084	1407531	AT1G04950	1.416497035	-	43	40	99.30000305	20.05749931	216.0325073	59.21000099	20.173	158.8645	0.2994186047	0.03832683568	0.2385654976	568	0.003946712901	0.04488691081
1	1407771	1410933	AT1G04960	1.430668415	-	30	68	93.84000015	28.31574984	186.3162544	63.94000244	15.02999997	151.277248	0.3	0.03709638459	0.235840073	677	0.004144216583	0.0462288473
1	1411087	1413627	AT1G04970	0.1026284794	+	85	84	97.84999847	16.85400066	196.7269989	87.02000046	8.170249891	212.1337566	0.09817927171	0.7895352428	0.9361199734	3206	0.1265325279	0.3005638655
1	1413643	1416218	AT1G04980	0.6198848358	-	32	20	79.97999954	11.62749984	198.0827438	53.30500031	12.09049985	183.5417477	0.28125	0.2399469115	0.5874015764	247	0.08633996581	0.2533380391
1	1416341	1419027	AT1G04985	0.01585741123	-	93	87	72.19999695	9.560999966	193.8879929	71.73999786	12.96150031	222.7765038	0.0730441231	0.9641455226	0.9990819787	3961	0.4049896453	0.4682994824
1	1425538	1428869	AT1G05000	1.056198285	+	27	14	60.04000092	27.45849934	193.7870079	47.99499893	12.1940002	136.7672504	0.3915343915	0.08786212758	0.3680334364	136	0.07445733659	0.2373958265
1	1431176	1433010	AT1G05010	3.687088637	-	1627	1826	51.68000031	12.3179997	158.9969986	46.10000038	11.10874975	154.0662498	0.07274491047	0.0002055471044	0.006523203412	1388439	0.0004541642558	0.009779670309
1	1438047	1441933	AT1G05030	0.005774757403	-	30	28	112.6599998	14.31849964	215.2427452	112.5250015	31.8829998	324.8897484	0.1142857143	0.9867911425	0.9999976789	415	0.4720878836	0.4915169652
1	1448630	1450901	AT1G05055	0.3007335677	-	35	34	66.22000122	9.054500246	155.6120003	80.16999817	17.3909992	171.5507442	0.1924369748	0.5003413918	0.7881013612	498	0.1233847538	0.297067649
1	1451001	1452872	AT1G05060	1.11283527	-	76	74	58.86499977	14.08875012	156.0387478	80.89500046	15.56424932	159.1062527	0.203769559	0.07711959328	0.3445844723	2436.5	0.07932159889	0.2435702626
1	1454605	1455322	AT1G05065	1.213351219	-	12	14	59.95499992	17.94699988	78.62624855	74.16999817	17.22225022	112.3762501	0.4880952381	0.06118553765	0.3084744328	58	0.09483119988	0.2632992341
1	1457006	1458802	AT1G05070	0.3375743047	-	70	108	66.72000122	12.89949968	167.2584984	57.53499985	14.12724972	165.7167503	0.1283068783	0.4596483393	0.7615137023	3413	0.1375520649	0.3106945241
1	1464238	1465875	AT1G05090	0.1856737337	+	69	74	100.5199966	9.220999908	194.4670059	108.1199989	12.46450002	268.4245064	0.1202506855	0.6521181176	0.8748746804	2418	0.2934394336	0.4191373985
1	1471322	1476289	AT1G05120	0.3647833704	-	29	32	116.2799988	41.90499916	196.495993	128.1500015	31.25499973	275.6037437	0.2155172414	0.4317343758	0.7440060224	400	0.17955739	0.3460377034
1	1477486	1478900	AT1G05135	0.2783181305	-	79	106	32.61999893	7.425500059	94.82399826	34.40999985	9.028749824	91.97000027	0.1181036542	0.5268437951	0.8051387407	4109	0.4148389653	0.471806288
1	1482545	1484059	AT1G05140	0.1428212606	+	151	220	59.45999908	16.90749979	159.3549995	57.43999863	14.83275001	158.5247543	0.07242624925	0.7197451373	0.9105834652	16346	0.3975641703	0.4654526956
1	1484066	1486960	AT1G05150	0.2849470241	-	71	98	67.41999817	16.17000079	151.114994	73.67499924	14.30575025	154.2034981	0.124461052	0.5188633268	0.7985682396	3355	0.3470265661	0.4441850096
1	1487377	1491005	AT1G05160	0.1562206051	-	34	14	110.4650002	23.72674971	226.4142483	128.0750008	21.38974938	179.5355019	0.2142857143	0.6978778187	0.9011913173	231	0.4413940903	0.4816925521
1	1490973	1494248	AT1G05170	0.2036258871	-	39	71	83.68000031	16.48450003	151.0695015	91.20999908	15.88750005	176.2900009	0.1455399061	0.6257114652	0.8643234726	1263	0.2248077893	0.3790257762
1	1498113	1501953	AT1G05180	0.2816388184	-	60	71	95.07999802	15.56525028	261.1942535	82.63999939	20.00750065	227.3950081	0.1392018779	0.5228308212	0.8015342248	2047	0.3515598235	0.4469733354
1	1502250	1503853	AT1G05190	3.809045559	-	1100	1360	70.43000031	17.24700003	159.1647564	62.81500053	13.75350022	172.8669945	0.08776737968	0.0001552224167	0.005222587563	671206.5	5.820551677e-06	0.0002619248255
1	1504940	1509152	AT1G05200	0.5249002225	+	64	61	122.2900009	19.24625051	202.2620033	112.1699982	15.10500002	235.4400024	0.1700819672	0.2986068578	0.6462553124	1739.5	0.1475273888	0.3199508499
1	1509102	1510341	AT1G05205	0.4757275709	-	34	54	62.63499832	23.9697504	175.3004997	66.52499771	13.70800004	173.1372498	0.2004357298	0.3344047434	0.6710056954	868.5	0.3372752281	0.4405992443
1	1510403	1511683	AT1G05210	0.1023757297	+	18	17	43.11000061	14.55425005	115.4499979	49.66999817	7.060000038	144.9600037	0.2091503268	0.7899948685	0.9362067194	144	0.3895309289	0.4625301896
1	1512895	1518900	AT1G05230	0.2884342592	-	18	30	123.9799995	32.50449972	205.8537483	104.2600021	20.73549981	208.4412479	0.2333333333	0.5147137153	0.7955512391	248	0.3235259604	0.4336696333
1	1529766	1531484	AT1G05260	0.978575017	+	39	14	65.41999817	13.78700018	154.5040054	42.8200016	8.473000026	114.9912476	0.3608058608	0.1050569971	0.4006831417	178	0.02829483924	0.1444575348
1	1531640	1534767	AT1G05270	0.06866887345	-	39	55	116.9300003	17.1374999	184.3964973	103.9700012	16.37999964	210.7699944	0.1235431235	0.8537508057	0.96247672	1031	0.3765216022	0.4579560448
1	1544926	1547849	AT1G05300	0.6829980218	-	17	15	78.63999939	17.44599991	137.4039948	52.22000122	15.9690002	126.8150024	0.3568627451	0.2074922968	0.5520220276	95	0.1134452091	0.2850840447
1	1550502	1552587	AT1G05310	0.06707226023	-	11	24	60.5	26.46000004	125.5074997	69.51000023	21.78625054	191.3722488	0.2083333333	0.8568952586	0.9632616074	122	0.3678444552	0.4536800302
1	1553567	1557848	AT1G05320	1.00671351	+	51	35	101.4400024	18.90750027	190.6375008	66.95999908	12.7065002	171.9494957	0.2610644258	0.0984660439	0.388597325	733	0.08110398221	0.2459003716
1	1558777	1559917	AT1G05340	0.05252589448	-	50	80	68.04999924	14.08674986	152.7114952	66.59499741	10.55799971	181.2339951	0.1025	0.8860823901	0.9742736724	1962.5	0.4297295357	0.4772765952
1	1560677	1564409	AT1G05350	0.5366568793	-	46	57	88.36999893	18.9000001	200.6324959	88.5	11.52399979	240.3839966	0.1891685736	0.2906317927	0.6392252575	1186	0.2044300395	0.3648116174
1	1564490	1567508	AT1G05360	0.3095770432	+	28	28	130.5999985	28.38849978	239.7289951	95.88499832	14.95625	216.6682529	0.2142857143	0.4902560444	0.7821528598	376	0.3997493276	0.4663444546
1	1576821	1582672	AT1G05380	0.7059711609	+	58	61	95.76000214	19.49299994	204.4957489	93.12000275	18.47000027	237.0850067	0.192481628	0.196801697	0.5390872853	1572	0.1480843856	0.3203939483
1	1582670	1583760	AT1G05385	0.2243399849	-	76	95	69.09999847	12.08125007	135.2262516	65.66999817	12.01549969	161.2925056	0.1157894737	0.5965680839	0.8474508502	3507	0.3750048686	0.4574001988
1	1585370	1587794	AT1G05410	0.4437727893	-	34	49	90.42499924	22.41825056	163.8767548	73.40000153	21.48800087	168.5379944	0.199879952	0.3599375951	0.6895648521	790.5	0.3486653272	0.4454632216
1	1594052	1595923	AT1G05430	0.3062547866	-	74	81	82.04999924	12.93000007	169.7017502	66.95999908	13.60000038	196	0.1307974641	0.4940207758	0.7846024047	2721	0.1618355773	0.3321491268
1	1624918	1629289	AT1G05500	1.18606605	+	103	114	87.23000336	18.5250001	199.5820038	71.96999741	15.11050036	224.1932545	0.1746721172	0.06515292986	0.3182116383	4960.5	0.02440180288	0.1339988168
1	1630848	1636018	AT1G05520	0.1562139529	-	76	70	98.77999878	21.49000001	232.6412563	99.46500015	24.36875052	282.2990086	0.1146616541	0.6978885082	0.9011913173	2554.5	0.3404238033	0.442123743
1	1645299	1647435	AT1G05562	0.4207248065	+	47	52	80.04000092	16.53650084	156.4930016	68.25	22.07674985	156.724501	0.1779869067	0.3795554165	0.7060185689	1062	0.1318610635	0.3056581796
1	1645299	1647435	AT1G05560	1.613780249	-	35	50	57.61999893	12.08950033	101.7735031	73.40000153	10.92674994	150.6332487	0.3171428571	0.02433435007	0.1891442664	678	0.03966152357	0.1729722387
1	1647574	1659611	AT1G05570	0.1604746263	-	36	24	92.57500076	15.55124998	239.4749947	93.05000305	15.74899981	336.6045021	0.1805555556	0.6910753043	0.8980269995	395	0.290899405	0.4180977803
1	1669349	1671902	AT1G05590	0.8433294324	+	38	54	58.09500122	23.72424946	172.0374962	75.14999771	23.57574983	197.9624985	0.2358674464	0.1434400961	0.4656917125	806	0.04087825928	0.1756558399
1	1671915	1673923	AT1G05600	1.719153167	+	43	41	77.68000031	20.08500071	146.7154945	54.18999863	9.56000042	151.9799957	0.3227453205	0.01909179811	0.1643953113	604	0.006591968208	0.06270566617
1	1678880	1681710	AT1G05620	0.01099352328	+	37	26	88.58000183	15.15599966	207.6119995	90.52500153	23.56875038	217.8712482	0.1185031185	0.975004178	0.9999976789	464	0.4089080863	0.4695994044
1	1682223	1687363	AT1G05630	0.295802882	+	14	18	104.2550011	59.47474928	196.8644997	90.58499908	13.41400013	211.7137497	0.2777777778	0.5060542983	0.7905738635	114	0.331110475	0.4374775706
1	1703001	1704838	AT1G05680	0.1064478985	-	85	12	50.08000183	10.07900009	159.5730072	45.19000053	12.70050015	154.6599968	0.1931372549	0.7826220892	0.9350166091	493	0.4282680907	0.4767882817
1	1706735	1709360	AT1G05690	0.0819147353	+	13	13	86.55999756	18.05099964	157.5179993	81.45999908	19.12700081	130.0350037	0.2307692308	0.8281047289	0.9509759212	72	0.2691503745	0.4053150325
1	1714817	1717290	AT1G05710	0.5938846525	+	20	11	94.49499893	22.84649982	168.7942448	104.8099976	47.26749992	178.6750031	0.3590909091	0.2547506774	0.6022969083	82	0.1281103959	0.3014009253
1	1717388	1718909	AT1G05720	0.417172164	-	101	94	60.75999832	13.04000044	132.3349991	54.04500008	13.19125021	148.8127491	0.1275542448	0.3826730132	0.7081328738	4333.5	0.14713748	0.3195820789
1	1721508	1724734	AT1G05750	0.9256561681	+	11	16	115.5599976	55.09499931	193.2400017	86.27999878	13.36500037	287.7350006	0.4375	0.1186707896	0.4257911445	61	0.09549110558	0.2636207445
1	1726557	1728520	AT1G05780	0.5092491157	+	16	39	50.14999962	12.53999984	141.8462543	70.65000153	24.43099937	156.7575012	0.2740384615	0.3095643098	0.6547269614	240	0.09258836945	0.2614164627
1	1730241	1732657	AT1G05785	0.5914715682	+	19	23	100.9700012	12.58799987	232.1330025	65.70999908	23.06200085	188.0799988	0.299771167	0.2561700965	0.6040743787	186	0.2093555353	0.3679765978
1	1732801	1737583	AT1G05790	0.8955778123	+	30	29	131.9400024	29.25449958	229.5630035	107.1900024	34.90600014	178.0349991	0.2942528736	0.127180986	0.4394139394	333	0.06190959098	0.2174689196
1	1744443	1747734	AT1G05805	0.1349897835	+	71	71	93.40000153	15.00750017	225.7324944	101.5400009	14.4150002	279.3549957	0.1126760563	0.7328417727	0.9157372047	2483	0.4400030113	0.4809237256
1	1748258	1749526	AT1G05810	0.2532588975	+	28	41	67.12000275	26.74150033	235.9272522	60.16999817	11.53999996	228.6199951	0.18728223	0.5581373711	0.8243599928	468.5	0.09972469935	0.2687428533
1	1754129	1761909	AT1G05830	1.38474243	+	34	36	141.5149994	52.71975021	275.1527534	176.3799973	30.36374927	342.2074928	0.3218954248	0.04123419971	0.2480708165	451	0.02964628116	0.1479100134
1	1762144	1762814	AT1G05835	0.1260079022	+	134	107	60.36499977	10.27199988	187.1392509	58.40999985	11.98199978	126.7899986	0.08634398103	0.7481558873	0.9211390266	6864.5	0.285919859	0.4155845151
1	1762733	1766283	AT1G05840	0.003560317292	-	85	62	97.08000183	18.49599972	218.1770004	96.79500198	14.48399966	243.5147472	0.07077798861	0.9918355779	0.9999976789	2573.5	0.4054487831	0.4686439811
1	1766502	1768837	AT1G05850	8.796499029	-	1054	2384	54.76999855	12.83925023	164.0809998	43.75	12.33449988	154.9404995	0.1191641303	1.597721103e-09	1.601577671e-07	1062927	2.827324596e-13	4.028937549e-11
1	1768985	1771286	AT1G05860	1.460503669	+	24	37	67.44000244	21.1689996	150.6819962	100.1800003	17.17000008	193.0850037	0.3592342342	0.03463349583	0.2286019811	349	0.08148569273	0.2463895452
1	1771384	1773385	AT1G05870	1.540669732	-	129	114	93.34999847	12.0960001	205.8220001	106.6650009	12.73924997	242.4562511	0.1840065279	0.02879587422	0.2065883671	6234	0.02040628921	0.1233908632
1	1779255	1784675	AT1G05890	1.498178343	+	127	128	111.3499985	18.22800026	224.7965065	91.90000153	16.25375013	264.4304947	0.1772883858	0.03175569759	0.2176186065	7187.5	0.05522016392	0.2053274706
1	1786848	1789737	AT1G05900	0.1192304567	+	50	48	129.0199966	18.81125083	234.1017529	133.4449997	16.12899992	234.018251	0.1316666667	0.7599229197	0.9259304356	1173	0.4253098079	0.4761540199
1	1790215	1796715	AT1G05910	0.106912447	+	39	23	106.2699966	16.81799994	239.2865013	96.44000244	29.10600014	228.1180054	0.1661092531	0.7817853952	0.9348797543	428	0.3853561393	0.46126025
1	1801109	1804000	AT1G05940	1.339957591	-	71	105	101.5500031	15.45499992	249.7874947	79	13.47599983	238.2140015	0.2068410463	0.04571328264	0.2620730215	3005.5	0.01478552762	0.1014193695
1	1807959	1815568	AT1G05960	0.02048963652	-	81	56	81.90000153	21	208.7700043	93.97000122	17.4662497	202.6399975	0.0873015873	0.9539165057	0.9959944037	2206	0.3938605521	0.4642371273
1	1815824	1817336	AT1G05970	0.4985978031	-	26	41	82.72499847	31.58375049	154.8637486	71.12999725	17.54000092	177.0299988	0.2317073171	0.3172504135	0.6590904016	431	0.09578407012	0.2641285257
1	1820307	1821894	AT1G06000	0.1755098812	-	75	47	58.91999817	13.02250004	122.1400021	64.62000275	15.30099993	118.7409992	0.1316312057	0.6675597122	0.8836153736	1671	0.3160611681	0.4310347643
1	1822582	1824236	AT1G06010	1.413182362	+	41	50	63.72000122	18.57999992	140.5800018	45.92000008	9.976250076	122.8984995	0.2873170732	0.03862047737	0.2390002837	792	0.03182897853	0.1537147964
1	1828339	1829983	AT1G06040	4.790055759	-	1126	1537	69.78499985	14.23125029	172.9175053	60.91999817	12.34400005	171.5159973	0.09450718858	1.621601886e-05	0.0007627826349	779376	5.794869382e-06	0.0002615789642
1	1830470	1832555	AT1G06050	1.01936128	-	22	21	100.5349998	15.98600042	390.544989	79.36000061	8.894999981	215.0400009	0.3593073593	0.09563981331	0.3832774764	159	0.04117032136	0.1760796478
1	1832940	1834861	AT1G06060	0.4750717076	+	85	112	68.08000183	17.4159996	155.2070038	62.99000168	15.47099955	206.4742504	0.1331932773	0.3349101366	0.671017342	4574	0.3198777354	0.432745987
1	1834828	1837758	AT1G06070	0.467323291	-	69	71	92.76999664	16.64500084	165.411998	73.48999786	14.2249999	191.472496	0.1551337008	0.3409390204	0.6785895696	2122	0.08645152055	0.2533577174
1	1843462	1846311	AT1G06080	2.777775481	+	657	554	91.76000214	22.11199989	192.7980011	87.36999893	19.04325008	210.0897564	0.1078114611	0.001668109358	0.03106454602	170008	0.0240800161	0.132943933
1	1853058	1855378	AT1G06110	0.3149694789	-	85	82	95.08000183	27.05900021	197.821994	76.35000229	21.68699961	257.1677631	0.1269727403	0.4842063952	0.7781753453	3273	0.2491825546	0.3950123712
1	1857756	1860938	AT1G06130	1.086273695	-	85	86	94.37000275	28.41500092	249.0800049	85.38499832	17.76250052	170.9399986	0.1893296854	0.08198347167	0.3561356129	3105.5	0.04493759012	0.1839449795
1	1868988	1873730	AT1G06150	0.3551792394	-	72	62	117.4099998	40.83449993	230.9060005	124.8650017	32.32549944	229.9627514	0.1465053763	0.4413882426	0.7480069128	2127	0.3204953706	0.4329876881
1	1889361	1891276	AT1G06180	0.6662228008	+	35	46	61.36999893	10.95400004	139.2474953	84.48500061	10.60000002	183.8449936	0.2291925466	0.2156637732	0.5611719198	637.5	0.05567315498	0.2060947572
1	1892230	1894194	AT1G06190	0.5615889366	-	167	215	64.95999908	15.67050004	170.4240005	57	12.64350028	156.9749992	0.1013507868	0.2744170323	0.6227402911	16820	0.1451528298	0.3182196653
1	1894288	1897027	AT1G06200	0.002887250544	-	128	169	52.73999977	11.8415	163.2997498	52.02999878	10.43599968	199.3280029	0.04918639053	0.9933739099	0.9999976789	10766	0.4730772408	0.4919989764
1	1897128	1899237	AT1G06210	1.455802861	+	55	80	54.93000031	10.71000028	141.2769943	65.83499908	12.60900033	134.1027534	0.2431818182	0.03501040531	0.2293268325	1678	0.009762895535	0.08030768908
1	1899950	1904897	AT1G06220	2.621509005	+	123	106	93.83000183	22.34799967	198.7550041	73.90500259	14.87500012	199.2874985	0.2388403129	0.002390512367	0.04059123511	4904	0.000619639145	0.01225368024
1	1906962	1911056	AT1G06230	0.4142401036	+	59	88	79.15000153	16.33699942	181.0594971	78.95999908	11.79050028	176.6725002	0.1488828968	0.3852653014	0.7099066439	2399	0.2187197777	0.3751270121
1	1911094	1913295	AT1G06240	0.1295889648	+	17	24	82.37000275	12.6840004	140.2459961	94.14500046	16.88100054	148.9467514	0.2058823529	0.7420121816	0.9183538028	193	0.3905601206	0.4628586973
1	1922207	1926278	AT1G06290	0.8617994939	+	129	115	90.38999939	14.23199997	198.0120056	71.76999664	10.16349974	232.4989952	0.1458712504	0.1374676492	0.4560813243	6535	0.05450843116	0.203933088
1	1935226	1936841	AT1G06350	0.08573578987	-	18	17	56.60499954	28.9780005	143.7457489	61.86999893	28.04799995	148.2059998	0.2026143791	0.8208507704	0.9482452328	137	0.3044738122	0.4245109699
1	1938861	1940496	AT1G06360	5.010850148	-	167	218	78.75	18.49099941	172.9504997	50.15999985	13.66074991	160.4772518	0.250920178	9.75326112e-06	0.0004805547471	13360	3.822917727e-06	0.0001821839645
1	1944992	1946303	AT1G06380	0.2900452127	+	57	51	67.44000244	17.25600052	129.8240021	58.15000153	15.28000021	144.7699928	0.1537667699	0.5128079948	0.7952271636	1453	0.5	0.5
1	1946745	1950860	AT1G06390	0.3049974376	+	155	196	90.15000153	23.37000008	206.4995071	81.18000031	22.74625039	234.757494	0.08801843318	0.495453114	0.7858370812	14665.5	0.2894194051	0.4173048401
1	1950595	1952880	AT1G06400	0.9417045553	-	115	215	56	12.83550019	133.6110039	45.20999908	8.349500227	135.6930069	0.1360970677	0.1143656084	0.4171403057	10945.5	0.04315053327	0.1804352707
1	1954673	1958866	AT1G06410	1.463178764	+	140	275	82.43000031	17.55099945	194.0564991	67.95999908	14.07049966	164.3065018	0.145974026	0.0344208219	0.2277226428	16007.5	0.002506072538	0.03341813242
1	1960030	1963189	AT1G06430	0.6340208679	-	470	513	62.27000046	14.39749975	152.3417484	64.93000031	12.50799999	202.352002	0.0656920078	0.2322625191	0.578824036	114452	0.08496327288	0.2514131049
1	1967086	1969656	AT1G06460	0.4901044737	-	266	244	70.06000137	14.71750009	162.9299965	67.45999908	15.19025004	175.7085003	0.08353876495	0.3235158227	0.6624994158	31378	0.2592292069	0.401273961
1	1969657	1974526	AT1G06470	0.1995506445	+	49	46	101.5899963	25.51399918	224.7699951	109.8550034	32.13000059	178.0437527	0.149068323	0.6316105208	0.866819542	1051	0.2869748172	0.4160777026
1	1989478	1990730	AT1G06500	0.1599866224	+	52	31	68.31499863	18.5844995	147.3362473	67.87000275	17.3999995	139.3349991	0.1563275434	0.6918522818	0.8982258525	804	0.4943667681	0.4988975195
1	1990633	1992228	AT1G06515	0.4095467675	-	93	106	72.16999817	17.49799976	214.9829971	68.31999969	12.08875012	194.1737499	0.1257861635	0.3894513669	0.712265843	4397	0.09488709015	0.2633301129
1	1992228	1993841	AT1G06510	0.08828123208	+	77	94	84.76999664	23.7199996	200.936998	73.81500244	17.30100002	175.4202492	0.09546836143	0.8160537558	0.9462966136	3311.5	0.1702599538	0.3382080626
1	2001381	2002802	AT1G06530	0.4779086715	+	91	98	57.68999863	15.74000001	129.5799961	51.375	7.806500173	120.23575	0.1350078493	0.3327295162	0.670384795	4012.5	0.117632885	0.2906330075
1	2003626	2007212	AT1G06550	1.654602989	-	54	64	118.3199997	26.47500072	276.371759	82.46500015	20.82300053	230.6529987	0.2702546296	0.02215118737	0.1799706587	1236	0.003966191433	0.04496604219
1	2007614	2012006	AT1G06560	0.1091298691	+	28	30	113.9500008	30.59200015	221.8815067	108.6199989	20.12725024	295.3605026	0.1666666667	0.777803926	0.9333263806	408	0.4289899189	0.4768800998
1	2011884	2013545	AT1G06570	1.427379117	-	312	305	69.03499985	11.95000005	172.8939987	62.08000183	11.65999985	161.547998	0.1124211854	0.03737841512	0.2360261851	43317	0.02708615827	0.1413634867
1	2016305	2024749	AT1G06590	0.386613561	-	16	13	153.3300018	21.41499949	220.0925045	79.16000366	59.71199989	219.3190033	0.3125	0.4105692686	0.7271972214	97	0.3878052713	0.462435808
1	2025543	2027413	AT1G06620	0.9733204613	+	24	14	45.625	24.52250051	173.5077507	68.61999893	22.17375054	130.4372467	0.3869047619	0.1063358088	0.40302242	132	0.1413488561	0.3145774956
1	2027605	2031388	AT1G06630	0.6319744239	+	26	41	97.16500092	13.51249963	261.5212498	114.8399963	16.23999977	244.3200073	0.2504690432	0.2333595486	0.5800474412	436	0.1071904162	0.2779113699
1	2031625	2034112	AT1G06640	0.4835749615	+	146	159	77.52500153	27.9637506	264.8887424	68.45999908	17.96499939	316.4630142	0.1071767037	0.328416553	0.6676272164	10621.5	0.1002303775	0.2695452142
1	2034155	2035824	AT1G06645	0.03023732055	+	37	32	110.6200027	31.39399834	217.1560013	116.6499977	30.39099951	209.8500053	0.1258445946	0.9327444626	0.9898837253	588	0.4832036276	0.4952658294
1	2035717	2037366	AT1G06650	1.013017153	+	143	172	82.16000366	13.68200011	158.4935013	67.15999985	11.49649966	174.5314983	0.1371361197	0.09704716356	0.3860373625	10586	0.01672542428	0.1091621203
1	2040409	2047655	AT1G06670	0.09989530733	+	35	53	103.2600021	17.22950077	190.2719994	97.83000183	16.22600002	177.5000015	0.1369272237	0.7945197416	0.9381531773	878	0.3380638006	0.4409269328
1	2047633	2049439	AT1G06680	21.79534435	+	15806	16794	70.51999664	15.54250002	168.6299992	65.11000061	13.96825023	166.6569954	0.05582015931	1.601974679e-22	7.276469361e-20	122917506.5	3.838020463e-31	2.066134349e-28
1	2049399	2052170	AT1G06690	0.8715000641	-	146	265	93.06500244	12.2387501	227.1849976	78.19999695	12.95200005	229.247998	0.1181442233	0.1344311568	0.4518864164	17228	0.03315121224	0.1571399761
1	2052369	2055548	AT1G06700	0.1858331041	-	175	220	85.54000092	12.86900005	234.5734947	79.23500061	12.32799988	247.6262539	0.07350649351	0.6518788578	0.8748746804	18578.5	0.2758217682	0.4088384051
1	2060443	2067483	AT1G06720	0.00584747291	-	37	31	94.86000061	18.14299946	272.4319946	98.04000092	27.09750128	199.3374977	0.1063644289	0.9866259343	0.9999976789	549	0.383796069	0.4601478059
1	2067508	2070455	AT1G06730	0.4854628262	+	24	30	78.65000153	27.77225008	127.1490032	61.76000023	21.39899993	130.2597488	0.25	0.3269920348	0.6661530884	273	0.0660628922	0.2243514341
1	2076503	2077767	AT1G06760	2.258869109	-	799	698	59.5	11.05899973	138.5975014	50.83999825	11.20675011	145.4162483	0.08836798147	0.005509737282	0.07491490308	258786.5	0.008094064266	0.07143122289
1	2078879	2082097	AT1G06770	1.644126032	-	24	27	101.2750015	21.46675031	185.5757496	73.04000092	21.39000006	150.9864986	0.4027777778	0.02269206234	0.1816903594	190	0.0058791472	0.05825044619
1	2083310	2087141	AT1G06780	0.03872458107	+	46	33	89.97000122	16.05250037	197.7062454	93.04000092	12.75999966	250.4179932	0.1231884058	0.9146931336	0.9826336944	738	0.419262336	0.4734742959
1	2087181	2089786	AT1G06790	0.2538470606	+	30	36	81.19499969	16.88324995	140.3169971	85.81499863	7.035000026	206.1287498	0.1888888889	0.5573819998	0.8235188467	532	0.4615286095	0.4874132028
1	2089416	2091686	AT1G06800	0.3739042971	-	26	20	71.33499908	28.112499	141.7700062	86.54000092	32.92324929	381.0844868	0.25	0.4227617655	0.7368111393	213	0.1514183034	0.3231512589
1	2092945	2096784	AT1G06820	0.4434925694	-	56	74	89.38000107	21.57375073	222.7650032	88.24500275	15.18299959	217.8832516	0.1597490347	0.3601699127	0.6898593815	1921	0.2395999953	0.3894525244
1	2097105	2097655	AT1G06830	0.578405884	+	17	15	42.83000183	17.80999985	169.2200043	58.20000076	19.0534997	116.3614975	0.337254902	0.2639940362	0.6128658866	96	0.1208707278	0.2946619207
1	2097746	2103507	AT1G06840	0.2881292254	-	31	24	110.5599976	25.89000034	251.9799995	99.47999954	13.52324984	213.7205029	0.2137096774	0.5150753599	0.7957051276	320	0.1910558729	0.3544162412
1	2105047	2106749	AT1G06850	0.6136868159	+	32	22	107.6949997	56.5410018	204.7807453	95.11999893	21.22849956	215.0404942	0.2727272727	0.2433958584	0.5909067651	243	0.02806113703	0.1438834778
1	2108511	2110986	AT1G06870	0.288011081	+	32	40	73.11000061	12.78225032	180.5509941	58.19499969	14.24925041	140.9972511	0.1875	0.5152154987	0.7957051276	559.5	0.1823061643	0.347973749
1	2111322	2114686	AT1G06890	2.314894682	-	110	83	99.18000031	27.81300063	226.9080017	65.55999756	20.45600061	230.5035042	0.2474260679	0.004842897956	0.06854091704	3428	0.001547327522	0.02379937094
1	2114764	2120745	AT1G06900	0.6996328811	-	43	50	114.3099976	63.47849846	200.8300064	105.7999992	39.75875034	249.4260033	0.216744186	0.1996949668	0.5431590919	946	0.1610450543	0.3318054155
1	2120990	2123801	AT1G06910	0.6807320655	+	12	20	116.2299995	47.35849934	158.1472534	103.1849976	19.23950009	211.954501	0.3666666667	0.208577729	0.5529230879	85	0.08965044911	0.2575744767
1	2130052	2135703	AT1G06950	1.993724189	-	268	308	95.76499939	25.84025064	205.2575005	81.78000259	16.52550015	192.6997463	0.1343283582	0.01014555503	0.1112346083	36035	0.004288635886	0.04722372925
1	2135809	2137838	AT1G06960	0.2549237548	+	56	58	111.3699989	23.01500034	273.4262505	100.4449997	9.382500076	257.8477592	0.1447044335	0.556001861	0.8231241231	1429.5	0.1357523542	0.3092728006
1	2150157	2152541	AT1G07000	0.03214433193	-	34	20	70.16999817	15.17674971	193.7125061	61.74500084	14.84549987	161.7959969	0.1470588235	0.9286577086	0.9888673842	318	0.3500751723	0.4460328391
1	2152797	2155269	AT1G07010	0.5022650448	+	132	214	89.09999847	20.06324987	204.3960072	87.34500122	12.06225026	194.6554996	0.1047861796	0.3145827867	0.6580250326	13627	0.2913816493	0.4182906359
1	2155212	2156153	AT1G07020	0.02378044298	-	59	46	74.05999756	8.301500034	197.9279938	76.84999847	11.76500034	216.2274933	0.1002210759	0.9467156513	0.9944722116	1319	0.4043147802	0.4681972086
1	2158412	2160818	AT1G07030	0.0310010238	-	75	67	84.80999756	13.78050003	166.5305016	80.19000244	19.59599972	194.091497	0.08895522388	0.9311056805	0.9892274736	2471.5	0.4342734177	0.4793999434
1	2160918	2163387	AT1G07040	0.7901849613	-	88	90	69.72999954	15.37725003	181.5482506	68.16999817	12.55825009	181.5457497	0.1646464646	0.1621119533	0.49120226	3574	0.131022923	0.3048044471
1	2168560	2169957	AT1G07070	0.02528928647	+	66	93	64.99000168	12.66124988	137.4387512	66.61000061	14.01199999	184.7960052	0.08308895406	0.9434322404	0.9931094211	2940.5	0.3272813027	0.4352670633
1	2169976	2172194	AT1G07080	3.313804516	+	329	384	62.34999847	15.38799973	195.6320007	49.34000015	12.63775001	175.6297523	0.1517936297	0.0004855069868	0.01268657002	53932.5	0.0003781217721	0.008481481416
1	2173951	2174894	AT1G07090	1.043917945	-	194	88	69.03499985	13.09150038	153.3987568	55.21999931	12.80674992	137.4254999	0.1572164948	0.09038202247	0.3725200182	7313.5	0.02706034598	0.141325407
1	2178021	2184193	AT1G07110	0.6240902937	-	153	229	108.7300034	17.35999985	246.6640015	93.33000183	12.20999966	268.1089996	0.1062590975	0.2376346172	0.5854476288	15592	0.03427979069	0.1599026822
1	2191678	2193836	AT1G07140	3.047728993	-	336	452	53.20999908	14.06124985	135.2912521	48	12.77949986	145.1559982	0.1401443321	0.0008959236629	0.01976062282	68152.5	0.006889435324	0.0644388304
1	2199996	2201272	AT1G07170	0.1415774462	+	86	111	64.20500183	16.02125037	189.3387489	64.25	16.125	176.357502	0.09773727216	0.7218094338	0.9118002998	4763	0.4904514042	0.4980927353
1	2204103	2207099	AT1G07180	2.931409296	+	187	424	72.41999817	12.73450007	185.8514977	50.02499962	11.69074972	171.4684971	0.1674402179	0.001171091162	0.02414441141	32590	0.0002260437105	0.005549907655
1	2208476	2212718	AT1G07200	0.09834765939	-	21	21	75.80999756	26.17000008	152.4350014	88.55999756	11.86499977	168.5100021	0.1904761905	0.7973561359	0.9381531773	216	0.4599248846	0.4868495688
1	2215215	2216982	AT1G07210	0.1199288312	+	93	113	56.72999954	15.11100025	172.309996	63.02999878	15.18199978	158.628006	0.09220667999	0.758701895	0.925688915	5158	0.4108052819	0.4705693729
1	2216924	2219649	AT1G07220	0.3738407319	-	21	20	83.83999634	24.42999983	186.1449966	62.44499969	22.11725039	173.6265011	0.2619047619	0.4228236472	0.7368111393	182	0.2366081589	0.3879475454
1	2220180	2223018	AT1G07230	0.9752198031	-	106	131	68.02000046	17.85500073	167.3212528	56.45999908	11.96499991	136.1949997	0.1556243699	0.1058717756	0.4020751406	5761	0.01218092396	0.09146453529
1	2223624	2225524	AT1G07240	1.415181881	+	34	37	75.71999741	13.03724983	193.7294956	105	13.45199986	289.5640076	0.3227344992	0.03844307504	0.2388328474	456	0.02354360622	0.1317004268
1	2225758	2227608	AT1G07250	0.7764024239	+	83	111	53.61999893	13.79600029	128.6459999	59.5	10.53499985	157.982502	0.1584717247	0.1673391567	0.4993148898	4179	0.1348893319	0.3082405302
1	2238016	2241471	AT1G07280	1.1586842	+	117	181	93.61000061	29.52099953	187.9199982	81.25	19.50500011	194.6350021	0.1513906597	0.06939302191	0.3278473853	8933	0.01135277061	0.08756425455
1	2247111	2248961	AT1G07310	0.5535963566	-	203	199	57.13999939	13.33300042	188.4839958	50.41999817	10.5809999	156.760498	0.09760625789	0.2795140503	0.6282221603	18011	0.03021516826	0.1491264756
1	2248966	2250529	AT1G07320	0.4147664116	+	739	1040	58.25999832	12.73049965	152.5164993	58.92000008	14.61899989	145.4047482	0.04331737275	0.3847986932	0.7094913375	372679	0.138635139	0.3116550543
1	2257383	2260187	AT1G07350	0.4030194492	-	83	98	134.7899933	22.34049997	234.022496	130.2649994	14.36675019	224.1662479	0.1313007131	0.3953489146	0.7166870134	3759.5	0.1910425628	0.3544162412
1	2260316	2262923	AT1G07360	1.428252453	-	93	158	62	23.65999985	140.2099976	79.70000076	17.5682508	182.2024948	0.1812304342	0.03730332527	0.2360261851	6286	0.02812386577	0.1439247939
1	2263036	2264553	AT1G07370	0.9133817863	+	22	35	90.56499863	29.05574884	154.3272499	67.48000336	19.0100008	154.2545052	0.3090909091	0.1220726054	0.4316481184	290	0.06068586388	0.215612083
1	2264633	2269121	AT1G07380	0.07249114959	-	24	19	93.77500153	26.20424991	199.0104977	108.4100037	28.80349884	201.9460068	0.1798245614	0.8462698146	0.9589562451	225	0.4756240564	0.4930952681
1	2274925	2275783	AT1G07400	0.09815795011	+	13	15	91.06999969	16.32699995	256.5370071	83.45999908	16.19250007	127.6570026	0.2307692308	0.7977045145	0.9381531773	90	0.3735530998	0.4562966905
1	2277554	2280502	AT1G07420	0.370145211	+	69	97	102.7900009	21.36900043	234.8680084	86.44000244	16.20800056	216.0880035	0.1350664874	0.4264369113	0.7399558833	2937.5	0.09036864275	0.2586833535
1	2286184	2287791	AT1G07440	1.535900893	-	59	49	77.23999786	13.61599984	190.6540009	48.70000076	10.81800041	153.6040009	0.2736077482	0.02911381426	0.2080383297	969	0.001654985899	0.02508732551
1	2291368	2294558	AT1G07470	0.1574111853	+	72	76	97.93500137	18.80200028	244.6955017	109.6549988	19.99750018	229.800005	0.1140350877	0.6959672678	0.9001432632	2537	0.2231713625	0.3778445841
1	2296022	2299544	AT1G07480	0.4679857232	-	65	61	101.0400009	21.24600029	213.0319977	78.30000305	14.73999977	208.3650055	0.1634300126	0.3404193803	0.6781792342	1677	0.06825618537	0.2282272037
1	2304434	2312399	AT1G07510	0.2262994505	+	46	42	63.82500076	20.56374931	131.1687565	57.09499931	11.19825001	170.4784935	0.1594202899	0.5938825293	0.8459681575	901	0.2950012597	0.420088499
1	2309533	2312385	AT1G07520	0.9273119892	-	15	19	100.0699997	33.12550039	193.5794952	68.73999786	13.99249978	144.2824982	0.3894736842	0.1182191986	0.4248000126	88	0.03053712465	0.1501546369
1	2313580	2316507	AT1G07530	0.7821511396	-	45	61	92.13999939	28.63900013	148.2329941	80.95999908	17.80500031	181.6549988	0.2134790528	0.1651386996	0.495802168	1169	0.09722126557	0.266140357
1	2331135	2333767	AT1G07570	0.8515514832	-	59	66	99.95999908	17.05899963	207.1349968	84.75500107	9.217500091	262.6662521	0.2013353878	0.1407500367	0.4614937477	1731	0.1432687171	0.3165558809
1	2336476	2339391	AT1G07590	0.1648041647	-	27	23	55.09999847	18.21949997	143.6894974	61.29000092	19.11450024	148.7179947	0.1948470209	0.6842201114	0.8940153214	310	0.5	0.5
1	2341446	2342148	AT1G07610	0.5752202303	+	383	172	45.86999893	10.65900006	156.9500023	43.62999916	10.80599999	154.8989994	0.09104985124	0.2659376151	0.6146292312	31010	0.1349536837	0.3082405302
1	2342197	2344314	AT1G07615	0.1236138887	-	13	15	81	37.70700073	135.034996	102.5699997	48.06300011	145.6139977	0.241025641	0.7522914246	0.9225137818	85	0.2902056192	0.4177615802
1	2348914	2351799	AT1G07630	0.4614817602	+	39	39	109.1699982	18.13550029	250.0745026	90.23999786	20.04099994	223.2650063	0.2051282051	0.3455558421	0.6812225913	675	0.1978189654	0.3595404252
1	2353030	2356413	AT1G07640	0.3924174493	-	100	75	63.43999863	17.71450005	159.7737503	71.95999908	11.21049976	186.065506	0.1333333333	0.4051189428	0.7238966603	3415	0.1565935352	0.3277775108
1	2359110	2366736	AT1G07650	1.348904042	-	53	44	112	36.08300133	219.8510025	97.55999756	18.42250018	245.2722435	0.2731560892	0.04478122381	0.2590111771	948	0.05750606067	0.2102768785
1	2368832	2369735	AT1G07660	0.5200867697	+	172	179	68.95999908	15.37174997	152.2767483	70.20999908	14.71150012	154.7810013	0.1022801091	0.3019348411	0.6490125577	15133.5	0.3921994092	0.463540284
1	2370019	2374607	AT1G07670	0.7472592385	-	74	80	77.22499847	16.56074951	196.770499	63.07999992	15.43425021	224.9444939	0.1733108108	0.1789537327	0.5158850663	2404	0.02227623045	0.1282252066
1	2379594	2381390	AT1G07700	0.1377021014	+	84	186	75.16500092	18.31699958	195.7150036	80.18000031	15.32125008	213.1037502	0.089093702	0.7282791867	0.9146331221	7792.5	0.4872414983	0.4968653286
1	2381554	2386157	AT1G07705	1.710197773	+	30	50	116.5150032	24.73974991	192.5922527	76.21500015	19.33149991	189.9667538	0.34	0.01948956863	0.1665491146	533	0.01571416382	0.1051590106
1	2390530	2392628	AT1G07720	0.4099065687	-	70	134	61.75	19.10624981	118.1490004	56.71500015	11.7992502	133.5772472	0.1304904051	0.3891288507	0.7120706978	4095.5	0.0689201992	0.2290680454
1	2394984	2397399	AT1G07728	0.5588377465	+	46	50	84.17000198	28.17624974	151.1649933	100.4949989	19.8265007	189.4597496	0.1973913043	0.2761609408	0.6241425803	994	0.1270521798	0.3006835721
1	2400588	2402942	AT1G07745	0.05984645816	-	15	12	139.6600037	90.48099937	269.6050079	140.2699966	67.53824892	266.4552502	0.2166666667	0.8712715676	0.9687830657	85	0.4131001017	0.4711188684
1	2403991	2406049	AT1G07750	1.535707264	-	78	101	80.65999985	18.26325049	166.7262482	65.37999725	9.829999924	172.0849991	0.2147753237	0.02912679745	0.2080383297	3038.5	0.004420818862	0.04817481179
1	2407410	2409791	AT1G07770	0.1175478879	-	1463	1870	55.47999954	12.51299977	155.3360023	54.39999962	12.73724971	158.2517467	0.02323187648	0.7628727675	0.9273305636	1363822	0.4411405333	0.4815604695
1	2409864	2412777	AT1G07780	0.1570000722	-	83	74	106.7300034	20.88450012	211.6669983	96.48500061	18.16324987	198.6225018	0.1108759362	0.6966263982	0.900156492	2855	0.2242854411	0.3785885613
1	2412937	2413790	AT1G07790	0.5092615951	+	154	149	46.36000061	9.812499928	120.7164991	54.61999893	10.67099972	159.5589966	0.1092129347	0.3095554146	0.6547269614	10395.5	0.07888810778	0.2430864207
1	2416177	2420829	AT1G07810	0.5643274959	+	73	82	96.65000153	21.85599976	150.4700012	87.32500076	13.00174999	216.3199928	0.1570330772	0.2726920671	0.6199873605	2931	0.412755417	0.4711188684
1	2421088	2422066	AT1G07820	0.3199867155	-	376	331	56.25	11.79874969	154.5287533	57.61999893	12.01749992	157.3050041	0.06280131131	0.4786447332	0.7744427081	61900	0.4519015296	0.4851816171
1	2422125	2423803	AT1G07830	1.329451276	+	64	74	82.83000183	16.98274975	210.9740025	61.65500069	15.27774978	148.2990009	0.2284628378	0.04683264907	0.2654759376	1782	0.006213271623	0.06061067318
1	2424044	2426728	AT1G07840	0.06605935108	+	54	45	84.53499985	18.95549946	202.8605	81.34999847	18.45899982	198.060994	0.1185185185	0.858896136	0.963993669	1207	0.4789836259	0.4938308272
1	2428772	2432091	AT1G07870	0.1009998382	-	16	15	85.52999878	20.31249988	181.8187447	62.38999939	10.38050022	194.9889977	0.2208333333	0.7925016257	0.9371907192	112	0.3834380571	0.4601022237
1	2437280	2439665	AT1G07890	4.912097463	+	1552	1051	70.47000122	15.25775018	183.6300049	61.58000183	13.85249972	193.6825027	0.0973820956	1.224341406e-05	0.0005912226692	755147	0.0006592548597	0.01284486513
1	2445436	2454645	AT1G07910	0.0527367565	+	21	24	121.7099991	36.13500023	206.625	114.875	38.98224967	242.2452549	0.1666666667	0.8856522769	0.9742289748	226	0.2809083902	0.4122342317
1	2454770	2457321	AT1G07920	18.08306262	+	3508	5296	68.38000107	15.94700005	166.3427547	60.29999924	14.5575	161.2087517	0.09988369269	8.259188514e-19	2.449945001e-16	8364053	1.153210044e-15	2.205514209e-13
1	2458183	2460817	AT1G07930	3.814122464	+	1830	2960	65.34000015	15.57599993	165.4527496	61.48999977	14.64874964	161.7715042	0.06449010486	0.0001534184306	0.00517386749	2575869.5	0.00218706697	0.03037240494
1	2462948	2465545	AT1G07940	15.86506746	-	3276	5018	67.69999695	15.66500008	165.5312557	60.29999924	14.43425	160.6230022	0.09663781814	1.364371187e-16	3.305189201e-14	7448924	2.440844482e-13	3.512641044e-11
1	2465728	2467165	AT1G07950	0.1170212722	-	71	73	63.34999847	16.00750041	145.9949989	59	11.47199993	196.776004	0.1088172873	0.763798371	0.9276244421	2563	0.4554570722	0.4859479222
1	2467144	2469316	AT1G07960	1.524856284	+	66	105	78.03499985	17.24500036	197.2587471	55.58000183	12.97200012	191.5579956	0.2229437229	0.02986370698	0.2103397589	2790	0.01617166072	0.1067461801
1	2469217	2472806	AT1G07970	0.3378284857	-	31	29	99.62999725	22.62750006	242.2400017	81.13999939	17.11299987	236.570993	0.212458287	0.4593793981	0.7614413902	390	0.1913952891	0.3545667254
1	2473164	2475128	AT1G07980	0.1768054987	-	21	33	73	26.1449995	184.875	89.45999908	13.70400028	206.9219971	0.1948051948	0.6655711694	0.8821733043	345.5	0.4964606353	0.4994912133
1	2475225	2476167	AT1G07985	2.378297024	+	14	16	48.78499985	15.1407505	155.8790031	22.81499958	10.88750005	94.78625202	0.6071428571	0.004185072406	0.06169373978	49	0.00468624937	0.04979139956
1	2476952	2483196	AT1G07990	0.5756570224	+	27	38	104.6800003	22.6295001	245.4345039	84.96500015	18.67300076	202.8652493	0.2436647173	0.2656702825	0.6144021569	406	0.07813430184	0.2420712807
1	2483239	2485726	AT1G08000	0.1742134779	-	23	21	48.47999954	12.85500007	115.7555023	68.59999847	13.19000006	155.1549988	0.2091097308	0.6695554079	0.8852895346	214	0.2629044767	0.4028018014
1	2485847	2488085	AT1G08010	1.321529991	-	60	62	74.97999954	22.92625017	218.960997	62.81499863	13.05400026	193.0360031	0.2413978495	0.04769468768	0.2677644981	1389.5	0.00804341745	0.07131888603
1	2489408	2493327	AT1G08030	0.1888596902	-	50	44	122.4799995	17.2337503	292.8062477	106.0949974	28.16425071	192.8470051	0.1481818182	0.6473517253	0.8738166166	1016	0.2634618727	0.4028236644
1	2495308	2498764	AT1G08040	0.0003539796698	-	41	50	81.48000336	20	241.9299927	76.88999939	13.56074986	236.4265053	0.0756097561	0.9991852638	0.9999976789	1001	0.4256535399	0.4761540199
1	2535250	2537932	AT1G08110	1.002523331	+	341	485	52.52000046	12.26999998	184.7549973	46.83000183	13.17799988	188.6169937	0.08579980047	0.09942066617	0.3905619954	77267	0.05403783669	0.203008518
1	2539613	2542362	AT1G08125	0.05623018862	-	32	38	87.375	14.18274992	201.6575054	94.74000168	17.92674997	219.0520012	0.1365131579	0.878556733	0.9720362189	585	0.3954033146	0.4646908795
1	2542662	2547946	AT1G08130	0.3907050333	-	63	75	103.7799988	20.29800034	241.9554993	113.3099976	20.94099922	272.8549896	0.1485714286	0.4067194735	0.7246520133	2180	0.2182981788	0.3748216749
1	2559412	2560432	AT1G08160	0.6249909175	-	14	28	71.28499985	28.8255003	136.3219994	55.03499985	15.47150004	129.1479994	0.3214285714	0.2371423299	0.5852247588	145	0.08892162735	0.2566473101
1	2564360	2565318	AT1G08180	0.05535282421	-	28	31	59.8599987	16.57424963	149.0715012	64.68000031	15.80500078	144.5700035	0.1474654378	0.8803333927	0.9723897726	407	0.3437483349	0.4430749266
1	2567419	2573448	AT1G08190	1.455142305	+	71	104	89.58000183	25.74749947	218.6274986	74.80999756	16.65150013	162.6467537	0.2143824485	0.03506369619	0.2293521528	2809	0.00366293116	0.04332034533
1	2573817	2576844	AT1G08200	1.099277108	-	416	806	62.56000137	14.74624979	162.007494	56.77000046	12.35249972	174.338747	0.07607009926	0.07956515114	0.3507672041	157070	0.03519065292	0.1622846865
1	2576983	2580754	AT1G08210	0.1664663623	-	35	56	63.66999817	16.91199999	219.8790016	74.73999786	16.00250041	217.8125019	0.15	0.6816063657	0.8922456713	922.5	0.3209680152	0.4330107393
1	2581021	2583390	AT1G08220	0.0001004673404	-	21	11	105.8799973	23.89000034	231.2399979	101.3600006	20.31499958	215.4724998	0.1212121212	0.9997686922	0.9999976789	111	0.4369510747	0.4804408961
1	2583593	2586969	AT1G08230	0.3172603512	-	47	26	90.5	13.48400035	211.8144936	67.00500107	12.68625033	271.5612469	0.1980360065	0.4816589658	0.7761843056	536.5	0.1969792956	0.3589749828
1	2588775	2590609	AT1G08250	0.595274338	-	62	69	67.57500076	13.3392498	115.7145	55.06000137	15.50500011	158.1080032	0.1734455353	0.2539368114	0.6016876145	1923	0.1602539729	0.3311044305
1	2607876	2609971	AT1G08280	0.0476896582	+	25	32	62.65000153	10.75799999	138.5420013	43.92500114	14.12975013	154.0520069	0.1475	0.8960048115	0.9775667933	391.5	0.4488150891	0.4842941725
1	2614773	2618823	AT1G08300	0.1942012113	+	14	13	142.3899994	51.22625084	258.0705112	124.5800018	39.49400101	256.2320007	0.2692307692	0.6394385111	0.8698245763	84	0.37622138	0.4578347085
1	2620334	2621545	AT1G08315	0.2699291247	-	34	32	76.28499985	10.68149998	140.4885021	74.18000031	13.29574997	204.6277538	0.1911764706	0.5371194452	0.8112047786	519	0.3766299788	0.4579868436
1	2632809	2635866	AT1G08350	0.2697300552	-	21	18	71.08999634	31.51000023	221	97.30000305	25.18250084	187.7407528	0.246031746	0.5373657035	0.8112142681	172	0.3210248679	0.4330107393
1	2635938	2638004	AT1G08360	2.683406008	+	1021	1538	62.36999893	12.37999964	167.875	54.47999954	11.7940002	184.6785053	0.07445465765	0.002072974655	0.03647782882	727434.5	0.0008072690565	0.01494640699
1	2638036	2640663	AT1G08370	0.4471544029	+	90	99	90.72500229	14.69900002	189.778997	78.93000031	12.95	192.4940018	0.1323232323	0.357145841	0.688202943	3910	0.07357346855	0.2359643348
1	2640802	2641934	AT1G08380	20.08200971	-	15606	15734	67.84999847	13.33124995	167.5962505	62.47000122	11.96000004	164.6267517	0.05465337397	8.279236453e-21	2.935090289e-18	113959689	1.813492027e-28	8.502937616e-26
1	2642071	2643285	AT1G08390	1.678939374	+	16	33	118.6850014	21.41500044	213.7774963	79.95999908	15.89800043	155.7439941	0.4393939394	0.02094404807	0.1736211178	180	0.03751577788	0.167267433
1	2643018	2646048	AT1G08400	1.068807035	-	13	16	81.73999786	35.29000092	172.1230042	114.4949989	35.08249903	179.2312527	0.4423076923	0.08534792453	0.3631534201	88	0.248340896	0.3944091248
1	2646143	2649440	AT1G08410	0.2209375187	+	32	41	81.59500122	24.5700006	139.0647526	78.31999969	27.79000092	182.2299957	0.1745426829	0.6012602337	0.8500201741	640	0.4315923792	0.4780706179
1	2649458	2657120	AT1G08420	1.092543183	+	63	84	101.0699997	26.87150049	203.5220062	86.59000015	13.20550039	211.915752	0.2063492063	0.08080845756	0.3536017745	2179	0.03392490215	0.1588872757
1	2667797	2671957	AT1G08450	0.1460949904	-	192	106	59.23500061	12.73250015	200.0052494	55.36999893	11.58749962	191.0212479	0.08313679245	0.714340066	0.908393076	9476.5	0.1631515635	0.3329693872
1	2672197	2674721	AT1G08460	0.09819986151	+	62	58	60.73999977	20.45349984	197.3387455	72.68500137	14.57700012	203.9507519	0.1151279199	0.7976275361	0.9381531773	1778	0.4592174629	0.4867713254
1	2675812	2679824	AT1G08465	1.22796436	+	51	73	65.56999969	17.84749985	164.1849976	56.36999893	12.64400005	176.7200043	0.2360999194	0.05916101816	0.3019781087	1483	0.02746256002	0.1427640593
1	2682057	2684171	AT1G08470	0.4728685427	-	49	31	63	12.26399975	153.0099945	61.63000107	18.03999949	147.744997	0.2093482554	0.3366134441	0.6732623099	753	0.4763747473	0.4931954761
1	2684175	2685702	AT1G08480	0.48654237	+	168	235	60.65999985	11.19174986	175.4757553	70.51999664	11.59200025	193.8985001	0.09483282675	0.3261802266	0.6653142847	18918.5	0.2381944931	0.388524337
1	2685658	2688658	AT1G08490	1.79856391	-	153	139	85.73000336	19.50400085	179.1679932	68.37000275	15.10450001	225.8734985	0.179385903	0.01590142665	0.148443954	9516.5	0.0606432574	0.2155133854
1	2688879	2690250	AT1G08500	0.6450930967	+	13	13	58.22000122	17.36300001	145.4429955	60	16.87500019	161.4779953	0.3846153846	0.2264158904	0.5723930524	69	0.2208391326	0.3762909277
1	2691061	2694547	AT1G08510	2.903412327	-	149	264	93.44999695	17.79900055	200.7509964	70.01000214	11.78875034	224.9652493	0.1941986984	0.001249072575	0.02546321161	15590.5	0.0002328534228	0.005697852695
1	2696380	2701022	AT1G08520	0.1310313266	+	314	337	100.6350021	16.47275038	249.1329952	104.6100006	16.28600006	217.5440033	0.0530250052	0.7395519276	0.9179624656	52810	0.4836163261	0.4954093523
1	2700980	2703162	AT1G08530	0.2638442755	+	29	25	90.38999939	21.64100046	182.1580063	71.37999725	12.0039999	231.0940063	0.2096551724	0.5446979296	0.8167097593	305	0.1613767847	0.3319186531
1	2703294	2706860	AT1G08540	0.2783898553	+	131	156	73.80000305	23.79749966	176.7149963	77.38999939	12.84875	178.1512489	0.09458798199	0.5267567927	0.8051135022	10203	0.4917406946	0.4983299476
1	2706867	2709988	AT1G08550	0.2367728259	+	37	49	85.29000092	15.78099966	199.6899933	79.23000336	12.11600037	232.7540039	0.1643684501	0.5797318677	0.8391995516	850	0.3126155636	0.4288802733
1	2709524	2711000	AT1G08560	0.5260617509	-	48	36	64.08499908	11.59525003	153.1755009	49.22000122	7.388750196	141.4312477	0.2083333333	0.2978092954	0.6453940822	731	0.1155292016	0.2876849315
1	2712693	2714833	AT1G08570	0.4135357817	+	273	390	69.12999725	14.44000034	175.2619995	66.85499954	13.67074986	169.566753	0.0706959707	0.3858906166	0.7105678772	50974.5	0.175898042	0.342739282
1	2714993	2716532	AT1G08580	0.3364634722	-	84	113	69.29499817	16.99024935	144.315744	62.24000168	11.5920002	178.3919952	0.1205225453	0.4608255263	0.7626474023	4677	0.4312906406	0.4780365349
1	2723676	2733613	AT1G08600	0.04323219459	+	27	27	105.1100006	23.34300003	279.1990005	91.63999939	16.38149948	216.538002	0.1481481481	0.9052484824	0.9800790397	323	0.2390694626	0.3891003399
1	2733595	2735819	AT1G08610	0.2769610256	-	16	18	74.15000153	16.66000032	146.8937483	80.47999954	18.85250092	163.5172504	0.2638888889	0.5284926775	0.805879256	116	0.1713509605	0.3387911545
1	2736655	2743881	AT1G08620	0.2791009197	+	37	39	79.23000336	13.61500034	183.1450073	96.26999664	16.20099916	202.5080032	0.1801801802	0.5258950467	0.8046194214	611	0.1264873069	0.3005595015
1	2743760	2747967	AT1G08630	0.01551788929	-	22	34	65.95999908	21.46499977	232.4862431	86.20999908	12.09699998	258.5232479	0.1310160428	0.9648995652	0.9990819787	366	0.449935602	0.4846426526
1	2748360	2751620	AT1G08640	0.3115150486	-	209	243	100.4199982	19.55200043	275.2140076	97.69999695	20.53200045	228.8429932	0.077834879	0.4880731888	0.781207334	23685	0.1086871746	0.2795060303
1	2752123	2753809	AT1G08650	0.7872820289	+	83	53	91.52999878	24.58800068	175.1209984	69.25	21.47599983	192.8189972	0.1920891112	0.1631991795	0.4933604393	1675.5	0.00974579458	0.08025786075
1	2756903	2759889	AT1G08660	0.8699510987	-	67	54	132.2799988	23.59799938	325.4910049	107.9949989	21.28874989	274.787756	0.2070204533	0.1349114784	0.4525742494	1440	0.0273417271	0.1422885798
1	2762583	2768967	AT1G08680	0.6415202514	+	67	87	89.34999847	28.99299984	274.5869934	83	15.65849991	246.562001	0.1655515526	0.2282862471	0.5747138224	2568.5	0.1039887672	0.2742654202
1	2769614	2771477	AT1G08700	0.2297959709	-	90	97	49.64999962	14.10274978	116.933499	48.29000092	13.49799976	133.6920013	0.110882016	0.5891203558	0.8432165802	4109.5	0.2452490004	0.3924539829
1	2771619	2773531	AT1G08710	0.1335976241	+	34	20	77.64500046	18.88550034	170.9044949	81.32999802	15.69850049	177.7477436	0.1852941176	0.7351947141	0.917039754	325	0.3975358615	0.4654526956
1	2773940	2779308	AT1G08720	0.7752662051	+	26	37	127.9049988	47.03499985	199.2525024	105.8700027	14.575	284.6369904	0.2744282744	0.1677775294	0.4996289775	399	0.1275993877	0.3009341392
1	2801041	2804711	AT1G08750	3.485497029	+	44	53	104.2299995	23.67999997	190.2912567	67.30000305	9.622999763	198.6050018	0.4138078902	0.0003269662837	0.009485937992	676	0.0001947931876	0.004906965306
1	2805043	2808623	AT1G08760	0.002662131545	+	24	28	84.19499969	35.42774973	233.1647552	88.04500198	25.08074965	179.1117504	0.1130952381	0.9938889644	0.9999976789	332	0.4743877639	0.4926227464
1	2808759	2809775	AT1G08770	0.2944622633	+	103	106	56.68999863	16.45600014	168.2169998	55.60499954	13.62124991	203.0737514	0.1117420773	0.5076188451	0.7920327354	5102	0.2073688314	0.3670266374
1	2809777	2811313	AT1G08780	0.2745741315	-	53	81	65.30000305	18.82099934	168.437999	73.45999908	8.029999733	152.0399933	0.1392965292	0.5314052841	0.807440498	2102	0.4206563336	0.4741190919
1	2812817	2818071	AT1G08800	0.6176208328	-	27	19	100.3000031	27.92099943	266.3935043	79.51999664	21.80249987	207.7784966	0.2943469786	0.2412010351	0.5883297609	206	0.1323272172	0.3059347294
1	2819064	2820478	AT1G08810	0.1206193361	-	34	36	70.56499863	10.06974995	140.1225052	75.34000015	18.72375047	140.7550049	0.1552287582	0.7574965582	0.925235187	574	0.3297287798	0.4365900544
1	2821353	2825481	AT1G08820	0.1497351624	-	102	114	65.52000046	15.59374936	156.1739986	60.38000107	12.11674969	231.2492531	0.09391124871	0.7083776292	0.9051077236	5565.5	0.2943126902	0.4195601169
1	2827059	2829315	AT1G08830	0.7937150305	+	259	356	83.88999939	12.72250037	224.4049988	75.29499817	16.9849999	186.3287449	0.09072274522	0.160799602	0.4900864364	43785	0.1434889107	0.3167042245
1	2838788	2841134	AT1G08845	0.1537929817	+	22	26	61.50499916	13.60100002	141.5247494	60.03000069	12.5162499	205.1237545	0.1958041958	0.7017897459	0.9031799147	276	0.4220818587	0.4748420911
1	2846893	2848100	AT1G08880	1.35566655	-	334	367	73.67499924	16.7594996	146.3349995	64.55999756	13.3559998	162.2589951	0.1034361794	0.044089325	0.2569852708	54958.5	0.009043109392	0.07686642983
1	2848148	2852270	AT1G08890	1.880475026	+	40	48	136.5999985	30.43249955	228.3567432	99.7349968	32.03325081	221.0620022	0.3291666667	0.01316815633	0.1319994154	731.5	0.02802406923	0.1438311604
1	2852362	2855941	AT1G08900	0.7669004448	+	56	53	127.2250023	28.76374984	232.3774986	139.3800049	18.43000011	270.7799927	0.2068733154	0.1710407354	0.5045236706	1332	0.1791803444	0.3457761957
1	2856161	2861170	AT1G08910	0.3778024727	+	30	19	134.9000015	45.81950145	253.3777523	124.6699982	50.98200092	200.4835007	0.2473684211	0.4189840856	0.7344893646	245	0.208819855	0.3678547049
1	2867202	2870745	AT1G08920	0.1714490648	+	26	26	107.5950012	22.86624932	176.8649979	99.98500061	12.40250021	213.739996	0.1923076923	0.6738309195	0.8877588244	319	0.3674660807	0.4535539693
1	2873299	2877270	AT1G08930	1.579868259	+	246	244	57.39500046	12.21999991	223.2287502	48.25500107	10.5984997	201.3640015	0.131414101	0.0263106599	0.1972595632	26104	0.006326860344	0.06127496015
1	2877429	2879169	AT1G08940	0.3976015489	+	31	19	78.65000153	9.660000324	177.9749985	72	11.13750014	189.080999	0.2495755518	0.4003118545	0.720622318	255	0.2178445344	0.374576836
1	2879505	2882234	AT1G08960	2.364475452	+	27	43	100.8799973	30.34550076	200.3529968	63.91999817	15.12450032	301.6580063	0.4151593454	0.004320405874	0.06304929657	378	0.007400108983	0.06746517785
1	2882490	2884342	AT1G08970	0.9940969667	+	97	146	60.45000076	12.53599987	140.3560028	57.01000023	12.54000008	155.8037472	0.1571811891	0.1013685031	0.3945333032	6650	0.2112057193	0.3692739691
1	2884350	2886621	AT1G08980	0.9592690165	+	108	114	80.76000214	16.80924947	193.2042465	71.78499985	12.46849978	211.6059959	0.1588693957	0.1098325289	0.4083411908	5167.5	0.01943653805	0.1203194551
1	2895165	2899446	AT1G09010	0.3952632509	-	117	96	105.0400009	16.94599934	220.7079941	102.3149986	19.8637495	196.7237492	0.1207264957	0.4024729983	0.7215918379	5163	0.1559956152	0.327383651
1	2899775	2904862	AT1G09020	1.430945089	-	57	107	108.5	44.68800049	178.7660034	92.61000061	33.99650078	208.6150024	0.2264305624	0.03707275929	0.2358255264	2464	0.02168594556	0.1268542923
1	2921063	2925826	AT1G09060	0.3968043159	-	48	62	98.21999741	12.55749989	224.4482548	77.61999893	10.3317503	273.71325	0.1673387097	0.4010473806	0.721122145	1303	0.1330645784	0.3064638959
1	2927501	2929107	AT1G09070	1.137275021	+	528	351	63.54500008	12.5044996	146.0335052	57.15999985	12.67999959	134.4849968	0.08784965035	0.072899572	0.3355955477	83326	0.005656968216	0.056902445
1	2936527	2939363	AT1G09100	1.266096272	-	65	50	81.30000305	21.64599991	204.623996	64.0150013	9.981750202	202.9680008	0.2461538462	0.05418807565	0.2888242316	1242	0.01546392612	0.1041075341
1	2939567	2942345	AT1G09130	1.28999158	-	349	541	75.23000336	14.66800003	213.7349976	81.19999695	13.11999989	231.1600037	0.09211425303	0.05128713277	0.279315653	89679	0.1034833105	0.2738266735
1	2942537	2945976	AT1G09140	0.4728201742	-	117	138	132.9600067	17.55600052	314.6290009	117	16.51174958	293.4642433	0.1164994426	0.3366509356	0.6732623099	7523	0.1745644131	0.3417230632
1	2946029	2949159	AT1G09150	0.02922765354	+	168	130	72.01499939	18.14924998	165.0269947	65.45999908	15.19974997	176.9105034	0.06181318681	0.9349154708	0.990598863	10903.5	0.4913478347	0.4982304897
1	2952596	2955745	AT1G09160	1.008615841	-	66	77	113.5200005	15.01250064	274.2999954	91.11000061	15.21100006	209.7330032	0.2012987013	0.09803567841	0.3878466482	2114	0.04207713865	0.1776332298
1	2965022	2965972	AT1G09180	0.3230542673	+	18	25	79.30500031	27.69774981	142.7797443	94.27999878	21.08599968	181.9879974	0.2488888889	0.4752758341	0.7728083956	192	0.2118279683	0.3697969765
1	2971570	2972334	AT1G09200	1.173613322	-	268	306	53.55500031	12.12675004	138.9924992	47.63999939	10.39499962	128.9949951	0.1078431373	0.06704813127	0.3226968834	37305.5	0.03105556753	0.1515439682
1	2972637	2977002	AT1G09210	0.1154468955	-	259	264	77.51999664	15.81549978	182.2394997	71.41999817	12.49325011	177.7880028	0.05760793261	0.766572269	0.9287428465	32591	0.1777596808	0.3444113155
1	2979510	2982713	AT1G09230	0.434089974	-	42	32	130.1100006	35.49025087	222.4182549	166.8349991	28.27024975	266.1362453	0.2083333333	0.3680527152	0.6965914347	598.5	0.21287039	0.3705474393
1	2984828	2986231	AT1G09240	0.1084390851	+	25	26	64.16999817	14.33600006	151.45	52.87999916	18.1875	118.9274998	0.1769230769	0.7790420768	0.9338464756	301	0.328957959	0.4361003223
1	2989140	2990427	AT1G09250	1.350017326	+	128	201	67.69999695	11.52174978	190.5062458	60.93000031	9.289999962	142.9400024	0.1536069652	0.0446665772	0.2588937959	11011	0.01381980759	0.09760490932
1	2994330	2998222	AT1G09270	0.7292822726	+	150	188	74.26000214	16.95024993	236.8412468	82.96500015	14.62849972	220.0409996	0.1175177305	0.1865167019	0.5265139371	12943.5	0.09763212638	0.2665945814
1	2998099	3001362	AT1G09280	0.5777702866	-	61	40	93.36000061	18	228.5950012	81.86500168	21.09224911	177.5317474	0.1987704918	0.2643806789	0.6131514164	1074	0.156170482	0.3274578701
1	3001438	3003762	AT1G09290	0.732450507	-	40	32	77.97000122	24.43224912	154.3027473	67.23500061	17.91824954	146.7527439	0.25	0.1851609895	0.5244708198	532	0.1115646287	0.2830269216
1	3003494	3008381	AT1G09300	0.7518874347	+	23	27	108.5199966	17.21899986	206.0640015	68.63999939	18.53600011	183.8600021	0.2995169082	0.1770567814	0.512551348	244	0.0994475628	0.2683734875
1	3008909	3009898	AT1G09310	2.546681959	+	2128	4179	38.78999901	11.12625031	114.6270023	36.66999817	10.74899998	119.5359985	0.04806299669	0.002839998043	0.04627732237	4263626.5	0.003747176062	0.04381754148
1	3009889	3012407	AT1G09320	0.1263012917	-	16	24	81.47999954	20.1762501	218.5974979	95.66500092	42.21475105	171.3652523	0.2083333333	0.747650638	0.9207847842	152	0.1377439848	0.3108531346
1	3012738	3015255	AT1G09330	0.4791395404	-	102	162	72.66500092	12.43324976	176.8115044	63.64500046	13.06624997	175.4992451	0.1176470588	0.3317878358	0.6696811174	7347.5	0.06513199153	0.2229612569
1	3015236	3018542	AT1G09340	2.175265899	+	2166	2402	65.69000244	15	172.0812454	69.39500046	16.3114995	182.7749989	0.04984919462	0.006679348465	0.08466436107	2459383.5	0.0007112384984	0.01358456186
1	3031045	3033582	AT1G09390	0.8099637815	+	22	56	78.26499939	16.75624974	159.680748	54.14499855	9.367499828	150.6024952	0.2743506494	0.154894579	0.4814783373	433	0.02135965639	0.1260255954
1	3037753	3038408	AT1G09415	0.2410414748	-	103	46	54.43000031	11.96299982	127.5780029	49.42000008	13.09500003	138.744997	0.1352891515	0.5740616371	0.8351502247	2337	0.4485059391	0.4842135193
1	3038461	3041873	AT1G09420	0.1256655777	-	14	17	136.4350014	41.74299917	241.1147514	165.9299927	58.50800095	256.326001	0.231092437	0.7487458398	0.9212969983	105	0.2960235688	0.420473231
1	3041995	3045541	AT1G09430	0.2756434808	+	246	211	66.61499786	13.07624972	204.1662483	58.72000122	11.00750041	199.642498	0.07496243209	0.5300984315	0.8068887529	24379.5	0.1318735772	0.3056581796
1	3045258	3048006	AT1G09440	0.02891885968	-	11	34	51.75	12.10000014	136.7324944	48.51499939	19.27099998	225.079744	0.1764705882	0.9355804546	0.990598863	184	0.4736776409	0.4923210322
1	3053697	3055360	AT1G09460	0.2641854025	+	22	16	86.06499863	34.164749	210.1757442	76.84499741	15.28125	146.3012486	0.25	0.5442702515	0.8162369073	144.5	0.179680241	0.3460377034
1	3057974	3060757	AT1G09480	0.5926532285	+	14	11	42.75	17.70750015	151.6059977	102.25	10.49000001	213.9724998	0.3831168831	0.2554740374	0.6032025884	54	0.1090193694	0.2799145971
1	3062222	3063396	AT1G09486	1.170977167	-	26	16	95.29499817	39.76499891	236.8562469	80.38499832	29.13249993	152.241251	0.3942307692	0.06745634915	0.3238038424	157	0.09544004409	0.2635715801
1	3063935	3065949	AT1G09490	0.308478649	+	113	98	80.40000153	14.63400002	222.3860016	77.88000107	15.61375029	244.3905018	0.1128770092	0.4914975428	0.7827190318	5438	0.4118871501	0.4708438636
1	3066673	3068796	AT1G09500	0.06228775437	+	168	36	75.04499817	14.49749961	192.1394981	85.86999893	18.17500079	181.7362518	0.1071428571	0.8663876354	0.9662163823	2957	0.4180497533	0.4731137007
1	3070914	3072074	AT1G09520	0.8208898522	-	84	95	77.74499893	16.15999928	194.197744	66.63999939	10.07350001	181.9914986	0.1667919799	0.1510463196	0.4756192062	3345	0.03124209648	0.1519289721
1	3075767	3079654	AT1G09530	0.1122330096	+	55	43	90.68000031	14.05150003	183.5154991	83.63999939	13.29699969	173.9650017	0.1310782241	0.7722661343	0.9305593919	1116	0.3182845981	0.432016515
1	3093643	3094954	AT1G09560	1.225334881	+	343	119	58.88000107	15.06199994	164.698494	53.15999985	13.68200026	117.4095028	0.1390842051	0.05952030103	0.3030219178	17565	0.01174219785	0.0894980838
1	3095159	3100819	AT1G09570	2.998459468	-	542	519	85.93999863	21.54099994	177.2647488	74.37000275	14.32699995	191.9770012	0.1187743958	0.001003553504	0.02126333845	123353	0.0002637424242	0.006325901214
1	3104491	3106366	AT1G09580	1.542121424	+	22	29	106.5649986	29.73324952	139.0909981	61.86999893	15.54099979	140.247995	0.394984326	0.02869978053	0.2065105495	216	0.0256234314	0.1375319702
1	3106366	3107801	AT1G09590	4.157776361	+	496	845	63.58500099	14.21750021	166.7274971	56.63999939	10.07799997	180.0860062	0.1272499523	6.953823111e-05	0.002681003154	188892.5	0.001269230133	0.02072838201
1	3112777	3116699	AT1G09620	3.413688822	-	228	300	79.81499863	19.97524996	178.1777531	69.20000076	11	167.2520035	0.1796491228	0.0003857546574	0.01078258451	27906	0.0001448587329	0.003814350874
1	3118154	3119815	AT1G09630	0.8230497403	-	49	68	59.45999908	12.64399986	121.0699982	63.62999916	13.4772501	161.8565037	0.2076830732	0.1502969819	0.4745029916	1400	0.07121911293	0.232517926
1	3119738	3122542	AT1G09640	2.55128806	+	700	884	62.26499939	13.77500021	150.551503	53.80000114	12.8707499	165.820248	0.09110536522	0.002810036364	0.0458440847	279587.5	0.0004876534751	0.01027252646
1	3122925	3124667	AT1G09645	0.4039443919	+	67	95	52.70999908	14.63050003	188.0830025	50.5	11.64849987	207.499498	0.1402985075	0.3945078125	0.7161874154	3020	0.2908337822	0.4180977803
1	3127761	3131094	AT1G09660	0.5101320518	-	60	50	119.3400002	29.22325015	273.8717499	96.70499802	11.94849992	226.5455009	0.18	0.3089355939	0.6542101022	1265	0.07960936429	0.2438304671
1	3136187	3137684	AT1G09690	3.257529284	-	1155	1896	50.34999847	10.61350017	147.2355064	44.82999992	10.22625005	146.7849979	0.07520275084	0.0005526761405	0.01377898405	1013806	0.000293163211	0.006895818366
1	3147636	3154404	AT1G09730	0.4532780401	-	45	48	85.26999664	20.84400005	222.0169968	110.0599976	19.37100062	259.402993	0.1875	0.3521453515	0.6850878556	1034	0.3632465056	0.4511097026
1	3154389	3156376	AT1G09740	0.1071894435	+	77	58	63.68999863	15.29599972	174.3790054	60.17000008	18.54349957	160.6232487	0.1115091805	0.7812869253	0.9348045324	2141.5	0.3429265164	0.4429429411
1	3157500	3159148	AT1G09750	0.8140763069	+	214	271	62.42499924	14.99899983	153.9529953	57.18999863	12.1849997	200.7750053	0.1023899024	0.1534347369	0.4792980661	26831	0.07882921798	0.2430595425
1	3159124	3161692	AT1G09760	1.117056588	-	156	143	71.00999832	16.13624954	209.3274975	61.02999878	12.26250014	158.381501	0.1456876457	0.07637362625	0.3428321981	9533	0.01500547196	0.1023803004
1	3161831	3165616	AT1G09770	1.004884739	+	158	145	72.03000259	15.96725082	166.6120003	65.26000214	17.28799973	171.8959961	0.1388913138	0.09888154893	0.389496833	10251.5	0.05715765568	0.2096809138
1	3165369	3167924	AT1G09780	0.2950566525	-	220	202	77.53499985	14.63849983	191.244249	71.59000015	16.74824934	180.813007	0.07920792079	0.506924577	0.7914230641	21148.5	0.1960810381	0.3581374872
1	3173533	3176910	AT1G09795	0.7080913117	+	161	158	85.62999725	16.92000008	196	92.59999847	16.5785006	231.2592487	0.1189165815	0.1958432864	0.5382080105	11846	0.1447200517	0.3178942046
1	3176882	3180734	AT1G09800	0.7300276962	-	12	12	93.57500076	38.89800091	207.1255035	111.7649994	36.33949871	123.1294973	0.4166666667	0.186196839	0.5260196414	63	0.3118024422	0.4285625057
1	3180925	3184224	AT1G09810	0.4443474287	-	37	23	85.81999969	8.812000036	173.2860016	110.8600006	11.13599997	176.5335007	0.2361927145	0.3594616565	0.6895648521	365	0.1808195018	0.3468834347
1	3189300	3190242	AT1G09815	0.3956748375	+	118	88	61.0700016	15.64699996	141.3140003	61.80500031	12.60750031	150.9590015	0.123459168	0.40209175	0.7215731617	5174.5	0.4839798906	0.4955846595
1	3190253	3192488	AT1G09820	0.09570866682	-	16	19	71.63999939	27.87375093	270.8924961	71.62000275	18.04750032	124.0614979	0.2072368421	0.802216025	0.9400993385	134	0.2811316887	0.4122342317
1	3192567	3195044	AT1G09830	2.178865605	-	46	91	69.31499863	12.91249979	130.3987522	78.11000061	13.70749998	173.7824974	0.298136646	0.006624214618	0.0843847147	1659	0.02408933825	0.132943933
1	3195718	3200403	AT1G09840	0.9074514234	-	50	72	107.0050011	32.50849986	218.3182472	94.91500092	21.42074933	246.9655033	0.2116666667	0.12375096	0.4344018168	1586	0.1331902316	0.3065453431
1	3201684	3204150	AT1G09850	0.7848190209	+	52	61	73.43999863	16.22124999	146.5049995	56.79999924	16.07499981	140.9449997	0.2055485498	0.1641273582	0.4945255289	1331	0.07131245348	0.2325999147
1	3205578	3208714	AT1G09870	0.7088502485	+	63	60	89.58999634	16.24900045	187.3949951	72.86499786	18.30274971	198.4667492	0.1896825397	0.1955013459	0.5377450073	1619	0.08554969733	0.2523725779
1	3218132	3219929	AT1G09900	0.3981935209	+	65	70	68	21.22400055	149.6919952	67.84000015	10.66874986	168.9024956	0.1505494505	0.3997665747	0.7205560947	2128	0.2594186531	0.401395922
1	3220034	3224541	AT1G09910	0.1644291537	-	29	24	86.58999634	12.80600004	265.7669983	109.2249985	20.14599972	272.2385033	0.1896551724	0.684811187	0.8944347409	339	0.4396397625	0.480786449
1	3224683	3227083	AT1G09920	0.5453354697	-	70	65	60.53999901	13.95600026	188.0367554	83.44000244	9.515999985	168.5480011	0.1659340659	0.2848816856	0.6333366931	2109.5	0.2337331814	0.3860625098
1	3236907	3239554	AT1G09940	2.914270613	-	33	42	67.12000275	17.79400072	131.5099976	37.67500114	12.66699963	186.2162548	0.4329004329	0.001218230271	0.02497457967	510	0.02571305914	0.1378094818
1	3252097	3255782	AT1G09970	0.9750224473	+	170	104	75.27500153	15.29074986	160.7389992	65.2349987	14.88525019	183.0312531	0.1484162896	0.1059198977	0.4020751406	7829	0.05619722266	0.2072637989
1	3256188	3261741	AT1G09980	1.354808598	-	64	61	97.32500076	15.70725005	249.4477478	123.0800018	11.23000002	398.2350006	0.2410348361	0.04417650986	0.25728658	1684	0.09321446958	0.2619722729
1	3262221	3263642	AT1G09995	0.2510212476	-	16	30	117.6100006	51.02125072	230.9262486	101.375	28.79925013	250.9967537	0.2333333333	0.5610205278	0.8264401863	208	0.2337681986	0.3860721244
1	3269538	3272110	AT1G10020	0.04496300289	-	28	62	61.67500114	17.47050047	154.8842537	67.17000198	16.86950021	182.3252506	0.1255760369	0.9016479448	0.9789454072	859	0.4704723598	0.4909691337
1	3273752	3275953	AT1G10030	0.4542689975	+	55	70	62.81999969	15.52800021	168.3429977	46.52000046	17.63375027	155.49025	0.1636363636	0.351342755	0.6842780309	1601	0.05381064421	0.2026788581
1	3284072	3287292	AT1G10060	1.386221439	+	100	59	119.5750008	20.28774972	222.7777519	97.20999908	16.11899996	246.3224907	0.2237288136	0.04109401362	0.2475348065	2199	0.003727441287	0.04365701781
1	3288086	3290471	AT1G10070	0.1708952703	+	95	81	126.3600006	18.92850056	245.6734993	110.25	14.75	290.2600098	0.1069525666	0.674690709	0.8882012006	3664	0.2934999254	0.4191826094
1	3290310	3296198	AT1G10090	0.004241821841	-	44	66	91.72000122	32.65425167	209.9490025	95.10500336	17.31625009	196.7975025	0.08333333333	0.990280388	0.9999976789	1446	0.4866148859	0.496695742
1	3304038	3306956	AT1G10120	0.6474205188	-	37	45	120.8899994	29.71600056	204.1189987	103.5	18.59800091	187.2839981	0.2246246246	0.2252057533	0.5709690606	671	0.0667718321	0.2254421788
1	3310929	3322269	AT1G10130	0.161211305	+	39	48	142.4400024	32.51900029	272.9000076	149.3000031	37.95024958	264.1965069	0.1490384615	0.6899040509	0.8976411724	872	0.2939218033	0.4194966036
1	3322553	3323735	AT1G10140	0.07237083239	-	67	50	74.80999756	11.28250017	211.9834969	67.92499924	12.20899971	171.741004	0.111641791	0.8465042982	0.9589841672	1514	0.1882657004	0.3520898039
1	3325798	3327614	AT1G10150	1.02150913	+	79	81	77.91999817	19.05300064	184.7445045	62.43000031	11.60999966	167.7599945	0.1909673386	0.09516798412	0.3819843307	2699	0.04396275446	0.1821954438
1	3333503	3338188	AT1G10170	0.6781839493	-	60	73	81.17499924	30.83249989	214.8217442	73.95999908	18.52999954	178.0039948	0.1805936073	0.2098051047	0.5538534684	2049	0.2626167725	0.4025664193
1	3338184	3341628	AT1G10180	0.8471710453	-	53	55	76.30000305	16.15199947	149.9049957	86.5	20.33049984	188.535997	0.2154373928	0.1421768719	0.4641825769	1264.5	0.1184018111	0.2918152747
1	3346382	3348139	AT1G10200	1.576045364	-	222	183	84.47000122	19.86499963	199.0980003	72.94000244	17.88200064	210.328006	0.1448825875	0.02654328291	0.1980526782	17325	0.005414010086	0.05541832746
1	3349081	3351180	AT1G10210	0.6532502301	+	28	24	101.6099968	24.60699983	243.9449951	80.15499878	28.92850065	139.5459957	0.2797619048	0.2222029241	0.5674260566	292	0.2122946452	0.3700770769
1	3355674	3356151	AT1G10230	0.8988161375	+	66	60	51.2349987	16.0112505	109.161252	44.15500069	12.17499983	111.07075	0.2045454545	0.1262361854	0.4381034951	1684	0.07444771007	0.2373958265
1	3356626	3359853	AT1G10240	0.04500630199	-	12	23	94.13999939	27.96100025	180.4797531	74.33000183	11.85700002	148.3574974	0.1920289855	0.9015580551	0.9789454072	122	0.2950599677	0.4201309396
1	3363431	3366493	AT1G10270	0.07930901659	+	29	35	68	13.47200012	194.0760025	66.80000305	21.55900002	127.4605003	0.1507389163	0.8330882006	0.9533287575	492	0.4198417737	0.4738256216
1	3370401	3377463	AT1G10290	1.046469851	+	132	140	98.8900032	15.87049956	223.5785057	83.09999847	15.91050005	197.6157486	0.1487012987	0.0898524967	0.3714923676	7874	0.01760385225	0.1127189394
1	3381446	3384003	AT1G10310	0.1374193687	-	48	76	63.68499947	18.28900013	142.1807522	69.96500015	12.19500005	172.1637497	0.1239035088	0.7287534626	0.9146331221	1726	0.308479091	0.4266636039
1	3388598	3390150	AT1G10330	0.8316667064	+	11	11	82.48000336	30.24249983	108.255003	55.41999817	12.11750031	100.9699993	0.4545454545	0.1473442843	0.4708991144	33	0.03811805781	0.1690710925
1	3392942	3395181	AT1G10350	0.1954439093	-	32	33	85.28499985	13.82275019	129.6279938	65.29000092	10.90999966	202.1939941	0.178030303	0.6376114256	0.8695816751	499	0.3542149863	0.4472374863
1	3395550	3396953	AT1G10360	0.4957657014	-	128	193	82.45999908	11.90200002	216.0390038	76.58000183	11.94400005	223.2880005	0.1074319948	0.319326013	0.6614272486	11830.5	0.2611164423	0.4021560153
1	3396882	3398358	AT1G10370	0.9628045507	-	223	293	58.38999939	13.82099996	156.3734993	51.40000153	10.996	151.5259979	0.1059704005	0.1089420264	0.4073182716	29168.5	0.01847299191	0.1164880423
1	3400553	3402420	AT1G10380	0.06802977572	+	33	19	67.88999939	13.95599995	152.4699982	62.25999832	20.93700037	169.4740059	0.1674641148	0.8550080906	0.9626291709	305	0.4395844519	0.480786449
1	3406955	3412874	AT1G10390	3.263715888	-	89	102	101.7699966	18.31399994	191.4079987	74.06999969	13.01975014	184.4982468	0.2881692003	0.0005448589786	0.01367793654	3346	0.0008770600551	0.01590273016
1	3416429	3419691	AT1G10410	1.080883236	-	80	52	91.71999741	10.18299959	217.0499935	109.7449989	24.99700003	289.3100067	0.2192307692	0.08300739109	0.358654111	1685	0.03308746982	0.1570450655
1	3428477	3430924	AT1G10430	0.1540466322	-	53	70	88.16999817	22.88000031	190.3980026	86.67499924	23.27625012	168.8700024	0.1253369272	0.701379984	0.9031260859	1747	0.2914898655	0.4183259474
1	3431763	3438370	AT1G10450	0.3826872864	+	30	32	116.3500023	26.16499861	200.5949982	137.6500015	34.54699883	283.0435089	0.2166666667	0.4142978825	0.7312470822	407	0.153573201	0.3253441884
1	3441987	3444360	AT1G10470	0.8712270022	-	127	229	54.5	12.16550002	167.5210014	63.15999985	10.45399981	180.7409973	0.1266719389	0.1345157068	0.4520241855	13368.5	0.1037408308	0.274059065
1	3453190	3460620	AT1G10490	0.4506444724	+	23	31	128.7299957	31.42849922	200.8994995	113.3799973	28.65250015	231.2999992	0.2454417952	0.3542872534	0.6865171615	299	0.1593576228	0.3303232864
1	3459999	3461485	AT1G10500	0.7934910892	-	204	383	84.61000061	15.55900049	199.7350067	75.08999634	14.74700027	191.6644981	0.09620897968	0.1608825387	0.4901345314	35071.5	0.02061312379	0.1239070588
1	3461634	3465786	AT1G10510	1.193788994	+	65	115	114.6800003	29.06000061	211.1920013	92.30999756	16.02499952	217.988501	0.1993311037	0.06400457321	0.3151444687	3108	0.0305166115	0.150104551
1	3469511	3471488	AT1G10522	2.001501436	+	100	133	75.30500031	13.18374994	146.7707512	54.09999847	12.18099985	201.2299942	0.2117293233	0.00996548786	0.109900126	5513.5	0.01285139603	0.09404665123
1	3479065	3481041	AT1G10550	1.11923083	-	19	29	81.88999939	34.9474988	195.3580002	62.20000076	11.56299977	122.9409966	0.3611615245	0.07599222674	0.3416477005	191	0.03828797724	0.1695660418
1	3487385	3491277	AT1G10570	0.5434837191	+	28	32	183.125	83.64249945	321.5272362	166.0149994	47.40575066	309.7645088	0.2455357143	0.2860989612	0.6342948944	389	0.1930177631	0.3555716381
1	3491257	3493834	AT1G10580	0.2452388311	-	56	103	76.38999939	23.23000026	164.501255	77.30999756	20.59899969	206.4415016	0.1274271845	0.5685401881	0.831569438	2714	0.2705315595	0.4057622099
1	3501987	3503544	AT1G10590	1.062619423	-	316	437	61.25	11.66874969	168.2787495	54.41999817	11.62599964	167.1790039	0.09165628711	0.08657262327	0.3657315865	64418.5	0.05811481417	0.2113997432
1	3503639	3506159	AT1G10600	0.2130768096	+	24	44	85.01499939	16.35625048	201.2744972	88.15000153	13.84899993	260.7197521	0.1856060606	0.6122421006	0.8566336377	522	0.4718650341	0.4914781705
1	3506185	3509006	AT1G10610	0.4252628732	+	30	17	156.125	42.70775042	285.7212547	150.8399963	59.48800049	315.5200012	0.2647058824	0.3756099832	0.7029991123	235	0.332966193	0.4384572836
1	3512738	3514824	AT1G10630	1.354578821	-	214	271	79.82000351	21.94349995	177.0127567	66.70999908	16.31250024	220.3299942	0.1247715281	0.04419988898	0.25728658	25308	0.008047610921	0.07131888603
1	3515181	3518035	AT1G10640	0.0309339531	-	27	29	68.83000183	24.83249979	189.5910011	75.87000275	15.22600002	246.6450027	0.1392081737	0.9312494878	0.9893079451	372	0.3776917709	0.4581815078
1	3523985	3526531	AT1G10650	0.0928604832	-	47	52	82.87999725	15.78949986	245.542495	81.68000031	15.92324989	267.4734959	0.1252045827	0.8074943956	0.9424407515	1175.5	0.3736017846	0.4562966905
1	3530352	3532017	AT1G10657	0.4410387797	+	40	17	76.11500168	15.85149968	155.65975	89.34999847	17.73799992	184.8959991	0.2558823529	0.3622106539	0.6916743438	272	0.1195169114	0.2929968471
1	3532228	3535137	AT1G10660	0.08940439567	+	85	79	75.77999878	13.58699999	199.6439987	84.65000153	11.57700028	237.3600029	0.09724497394	0.8139460208	0.9451182316	3131.5	0.2290081717	0.3821771647
1	3535287	3538439	AT1G10670	3.807590683	+	342	539	71.00500107	13.66449986	172.1732536	59.06000137	10.5110002	229.0739967	0.1490414348	0.0001557432799	0.005228010564	81196	0.001436783608	0.02238501223
1	3544912	3545614	AT1G10682	1.361510671	-	491	339	45.61999893	11.8525002	122.4124985	38.84999847	11.93649993	145.8039993	0.09682245012	0.04350000725	0.2551998805	76733.5	0.02795506946	0.1437375007
1	3549919	3550848	AT1G10690	0.6805168256	-	12	14	85.18500137	28.39824977	138.8565054	64.0150013	17.56224985	143.3784996	0.3928571429	0.2086811274	0.5529954762	48	0.0339309325	0.1588872757
1	3554103	3556544	AT1G10700	1.332133255	+	44	38	99.27000046	21.23250084	177.6552525	68.38999939	13.85099967	156.5437534	0.2942583732	0.04654432588	0.2645763694	563	0.005639062229	0.05688918233
1	3562840	3564850	AT1G10720	0.4523442521	+	44	57	85.11000061	15.73074994	205.5990017	74.76999664	12.04799995	192.8820007	0.1814194577	0.3529033231	0.6854124565	1141	0.2204975141	0.3760482746
1	3565256	3568106	AT1G10730	0.394729795	+	27	16	99.25	35.95950031	193.9354965	116.8349991	39.46125031	202.8875008	0.2685185185	0.4029676707	0.7219422285	178	0.1730392527	0.3402999718
1	3567904	3571053	AT1G10740	0.3562780519	-	56	108	89.01499939	25.57125068	188.6700001	97.63999939	16.09550002	212.5262512	0.1395502646	0.4402728937	0.7475371831	2838	0.2600273583	0.4015615866
1	3580829	3590928	AT1G10760	0.2407859907	-	120	109	117.8250008	23.05574999	280.722007	110.6399994	27.27999954	259.5850006	0.1016055046	0.5743994419	0.835205793	6076	0.1772996754	0.3442493698
1	3600909	3605076	AT1G10820	0.2888741646	-	39	39	126.2099991	30.05249956	214.6990021	132.3699951	31.61450176	375.1614868	0.1794871795	0.5141926156	0.7953916527	676	0.2006100861	0.3617252948
1	3605511	3607580	AT1G10830	0.1271681211	-	63	123	80.97000122	21.82800035	206.307003	86.13999939	13.52850027	177.5494972	0.1029810298	0.7461598542	0.9203746099	3842.5	0.4638861683	0.4885209533
1	3607630	3610616	AT1G10840	2.369135222	-	295	364	77.37000275	17.10600023	192.2720039	65.22500229	12.99000025	186.9162472	0.1359843546	0.004274297809	0.06267184162	45086.5	0.0002000406089	0.005030432959
1	3611489	3614613	AT1G10850	0.09600196276	+	44	57	76.24000168	32.74799967	157.2677517	75.5	30.35600128	134.6560028	0.1255980861	0.8016744403	0.9398562663	1230	0.436065673	0.4800586653
1	3614512	3616308	AT1G10865	0.7485829285	-	102	119	47.92000008	15.00800004	152.0059994	45	11.75750046	159.9665001	0.1456582633	0.1784091284	0.5146212901	5674.5	0.2028588563	0.3633755781
1	3616609	3623806	AT1G10870	0.03229243745	-	32	30	89.38499832	18.99975047	242.2805	106.8699989	13.98549988	264.9440052	0.1333333333	0.9283410666	0.9887475198	471	0.4523484437	0.4851928454
1	3627645	3630808	AT1G10890	0.0584931386	+	34	30	153.515007	49.93800035	261.8909943	140.7099991	35.16924982	226.4864964	0.1431372549	0.8739908006	0.9698035184	453	0.2235913525	0.3783491954
1	3632131	3637250	AT1G10900	0.1524094498	-	65	99	106.2300034	17.80000038	196.4159943	98.54000092	15.99250031	221.8499939	0.11002331	0.7040290023	0.9037411948	3197	0.4731967588	0.4920176615
1	3639834	3644187	AT1G10910	0.2075176282	+	60	57	119.5600014	32.5660008	242.0022564	114.2799988	21.0140007	282.6580078	0.1359649123	0.6201294719	0.8611042354	1605	0.2843931446	0.4144659004
1	3644179	3647784	AT1G10920	0.3107726652	-	13	13	117.3899994	40.34999886	206.1580048	94.68000031	29.16800041	190.9159973	0.3076923077	0.4889082151	0.7813392971	60	0.1092045933	0.2801087219
1	3647875	3655685	AT1G10930	1.373712351e-05	-	12	19	91.79500198	38.74500017	187.5222557	102.8399963	21.70000029	243.5069954	0.1096491228	0.9999683696	0.9999976789	113	0.4919109314	0.4984151832
1	3655672	3658612	AT1G10940	0.0211141116	-	78	97	95.56999969	11.20050004	274.2512589	99.25	9.176000023	197.5279999	0.07692307692	0.9525458481	0.9959944037	3733.5	0.4415285481	0.4818031116
1	3659203	3664264	AT1G10950	0.5034197823	+	286	305	88.45499802	31.18499899	198.3775024	81.55999756	26.66200066	215.7560028	0.07829875043	0.3137474593	0.6570478882	40497	0.06644432659	0.2247017885
1	3664186	3665040	AT1G10960	1.610814214	+	1315	1300	51.25999832	11.40399995	137.8869949	49.01499939	10.60349965	147.1132515	0.05774495467	0.02450111146	0.1897302371	815320	0.02055180902	0.1236471709
1	3671755	3676133	AT1G11000	0.3581768898	-	19	16	118.8700027	47.32499962	201.074501	110.0500031	50.44875097	353.3337517	0.2796052632	0.4383521189	0.7463152775	140	0.351674697	0.4469733354
1	3676690	3678567	AT1G11020	1.392745768	+	40	51	87.47500229	36.5717494	265.3444977	69.93000031	15.125	166.5600014	0.2862745098	0.04048127962	0.2454715892	740	0.01271105467	0.09345743819
1	3681887	3684169	AT1G11050	4.002010731	+	41	40	84.44000244	37.47999954	158.4799957	53.5	13.48199999	131.6577427	0.4792682927	9.953808215e-05	0.003607945197	404	4.337603915e-05	0.00143288802
1	3684567	3689892	AT1G11060	0.05698470501	+	25	16	135.5200043	24.32399979	237.6940002	132.6949959	37.67499924	231.6499939	0.18	0.8770317079	0.9713764666	188	0.3792883279	0.4587637895
1	3694327	3698013	AT1G11080	0.3263357912	-	15	16	124.0800018	13.52100015	168.1490051	78.14999771	29.8925004	207.029995	0.2875	0.4716981889	0.7700924605	111	0.3684384491	0.4539406388
1	3702607	3703779	AT1G11090	1.084267364	+	50	47	68.35499954	14.26499996	123.8317503	56.43999863	8.974999905	136.1915039	0.2493617021	0.08236309076	0.3567887123	975	0.07492040495	0.2381817884
1	3715083	3717659	AT1G11120	0.6447508248	+	11	22	54.59000015	10.97749996	162.3899956	102.954998	14.81974993	227.9459969	0.3636363636	0.2265944013	0.5723930524	89	0.1144943732	0.2864415514
1	3722707	3727450	AT1G11130	0.4338577877	+	31	21	110.25	35.76000023	231.0600014	89.06999969	13.79000044	227.2799988	0.2488479263	0.3682495394	0.6966718059	265	0.1315792162	0.3054936974
1	3744857	3745655	AT1G11175	0.971612913	+	39	29	69.58999634	17.29599953	122.7284992	50.31000137	13.02400017	105.6189987	0.2864721485	0.1067547203	0.4036628146	403	0.02227596244	0.1282252066
1	3745773	3748557	AT1G11180	0.07633300898	+	41	37	66.41999817	13.52000046	243.1900024	70.36000061	16.65099983	175.251004	0.1357943309	0.8388165508	0.9558867482	751	0.4720784122	0.4915169652
1	3753212	3755658	AT1G11200	0.4770019972	+	47	52	60.77000046	16.13149986	176.0914948	54.41500092	8.858250093	154.9272469	0.1849427169	0.3334248795	0.6707724045	1096.5	0.1905439258	0.3539875797
1	3755667	3756998	AT1G11210	0.2194889196	-	66	52	82.23500061	11.55624962	143.2662525	74.54499817	15.09599948	154.6767452	0.1381118881	0.6032690993	0.8514762702	1583	0.2363098624	0.3876271132
1	3766753	3769799	AT1G11240	0.2923422086	-	62	66	68.90499878	12.24050007	242.0459999	59.40500069	14.34000027	254.4737492	0.1417399804	0.5101028986	0.7937060078	1904	0.2499461815	0.3956619198
1	3777235	3780823	AT1G11260	4.501138661	+	392	822	59.6950016	8.996249819	167.4037476	43.23999977	9.305749822	158.3385029	0.143210934	3.153997456e-05	0.001389192516	138651.5	4.208954278e-05	0.001396738594
1	3780385	3787099	AT1G11270	1.605433849	-	22	19	55.4849987	19.04099956	176.8589954	124.4800034	16.42499971	251.6529945	0.4425837321	0.02480653759	0.1910773842	130	0.0200687323	0.1224833816
1	3787317	3790935	AT1G11280	0.6409200122	-	39	64	119.8399963	23.92300062	215.872995	115.6049995	18.76650035	264.1469948	0.2055288462	0.2286019801	0.5752648512	1245	0.4932192017	0.4986048892
1	3800499	3804233	AT1G11310	0.07451623002	-	149	116	94.12000275	22.02099972	192.7900024	91.68500137	14.755	222.2824955	0.07504049988	0.842332912	0.9574170029	8237.5	0.2569769307	0.4002365931
1	3809794	3813809	AT1G11330	0.9627548876	+	21	20	90.95999908	20.08000088	153.4250031	58.28000069	24.32850008	160.3067513	0.3595238095	0.108954485	0.4073182716	160	0.098341382	0.2671311478
1	3817423	3820887	AT1G11350	0.08349115121	-	35	49	94.08000183	14.28749995	216.1375038	96.44000244	19.40799942	215.5519958	0.1346938776	0.8251042969	0.949902762	854	0.4891425761	0.4975479484
1	3821105	3823088	AT1G11360	0.3658474638	-	86	130	62.87000084	18.25750041	132.1124935	53.65999985	11.75150013	165.0095016	0.1191413238	0.4306778499	0.7430356954	5119.5	0.1479438975	0.3202254372
1	3832562	3834462	AT1G11380	0.02349254822	+	25	20	71.83999634	14.83000031	218.2360016	54.52499962	27.61899972	148.3807453	0.15	0.9473434392	0.9949159602	238	0.3963991906	0.4650450415
1	3834431	3837676	AT1G11390	0.008441264222	-	24	31	77.34000015	8.345249844	203.05	83.25	16.8974998	222.8649979	0.122311828	0.9807509462	0.9999976789	370	0.4898453593	0.4978952655
1	3837693	3841218	AT1G11400	0.7803240377	+	85	72	73.37000275	18.51300068	169.162999	54.8900013	13.21975005	156.8647499	0.1748366013	0.1658349111	0.4966282643	2393.5	0.00948352675	0.07923054251
1	3840876	3844479	AT1G11410	0.06592781212	+	27	36	93.76000214	23.10549965	213.400499	97.34000015	27.56124997	204.1687489	0.1481481481	0.8591563175	0.963993669	480	0.4695548546	0.4906880301
1	3847219	3849224	AT1G11430	1.027371324	+	372	540	73.39999771	12.26224992	182.025753	71.56499863	13.88125024	168.6290016	0.08261648746	0.09389201863	0.3792921238	95184.5	0.08944396576	0.2574506919
1	3849200	3850735	AT1G11440	1.891206804	+	44	48	71.94499969	12.42299993	143.7969955	86.97499847	6.814750004	255.4369881	0.321969697	0.01284674774	0.1300330629	773	0.01361831378	0.09722825373
1	3853183	3855507	AT1G11450	0.1878178043	+	16	13	103.8549995	27.59999967	221.9937515	122.4100037	24.04100056	297.5119873	0.2596153846	0.6489066064	0.8740754854	83	0.1843304664	0.3494513277
1	3862398	3864074	AT1G11475	0.8369299631	+	155	268	59.45999908	14.11099997	158.8870041	52.18000031	12.29124997	159.9172527	0.113986519	0.1455693815	0.4682122064	18703	0.04402926855	0.1822744
1	3864042	3867000	AT1G11480	0.1422176971	-	118	117	75.61999893	19.03100085	184.1302437	80.23999786	11.95699997	186.7420059	0.08901926699	0.7207461031	0.9109685665	6552.5	0.2508905595	0.3965286764
1	3874395	3875484	AT1G11530	1.266181371	+	130	134	60.05999947	15.31000018	196.5917484	51.61000061	10.63550003	160.9047493	0.1626865672	0.05417745858	0.2888242316	7352	0.01430975926	0.09959265719
1	3878494	3880391	AT1G11545	0.1969445014	-	56	73	76.30500031	16.11875057	173.4224968	68.06999969	14.26399994	139.971994	0.1291585127	0.6354121262	0.8682725337	1958	0.342267005	0.4427578714
1	3888609	3890824	AT1G11580	1.91997444	+	113	58	72.79000092	18.14400024	174.3079987	50.28500175	8.407750392	168.8507481	0.2526701251	0.01202335195	0.1248090153	2588.5	0.01239306256	0.09242089794
1	3895178	3896934	AT1G11592	2.443753477	-	36	25	107.7099991	36.1737504	201.1262474	60.56000137	24.13199997	165.9860046	0.4455555556	0.003599536015	0.05513093359	301	0.01471382971	0.1011662795
1	3901949	3903895	AT1G11600	0.0008086432319	+	83	50	52.61999893	15.06849995	158.4529938	56.42000008	13.57250001	121.8987509	0.06795180723	0.9981397625	0.9999976789	2036	0.4290299223	0.4768800998
1	3912753	3914465	AT1G11630	0.2719942262	-	28	38	74.33499908	17.34699979	154.8780006	84.5	20.8009995	180.5760063	0.1936090226	0.5345714663	0.8097082716	484	0.2688558311	0.4051273148
1	3914773	3918243	AT1G11650	1.449454128	+	672	797	66.25999832	12.31424999	181.9289974	59.22000122	10.73900042	173.45	0.07386142977	0.03552596408	0.2308044982	245145.5	0.002588385946	0.03412415154
1	3920477	3924566	AT1G11660	0.2215686257	+	57	45	101.0699997	13.53000031	206.204007	78.36000061	12.78500004	223.5290039	0.1485380117	0.6003871304	0.8495548034	1230	0.362998807	0.4510868603
1	3928114	3931701	AT1G11670	2.060635111	-	33	36	105.6800003	25.55400009	220.7679993	54.51499939	10.08000016	230.5637569	0.3838383838	0.008696908269	0.1002454891	403	0.01105766705	0.08631750299
1	3938421	3940871	AT1G11680	2.101860775	+	224	316	67.44500351	16.62475009	148.3635002	60.75	12.62250018	157.0062485	0.1436482821	0.007909321431	0.09415396151	31642.5	0.01792387267	0.1139795668
1	3945583	3946757	AT1G11700	0.7298537604	+	53	43	51.16999817	21.82300053	148.5480042	61.93999863	16.97099924	133.1669971	0.2172005265	0.1862714261	0.5261280954	928	0.0600222237	0.2143534277
1	3951365	3957044	AT1G11720	0.135771769	+	60	66	105.4949989	30.34349937	249.6477448	119.6800003	21.83750057	273.4187469	0.1196969697	0.7315234136	0.9154854197	1926	0.3969176983	0.4653916832
1	3967475	3969877	AT1G11750	0.2128016526	+	331	378	81.54000092	21.32749987	196.8274994	84.39500046	19.36475019	198.2054977	0.0565626049	0.6126301233	0.856718453	62012.5	0.4204761693	0.4741025009
1	3969680	3971911	AT1G11755	0.3199641714	-	37	37	81.80999756	20.78399925	177.2989944	85.55999756	12.81899977	185.4740051	0.1891891892	0.4786695801	0.7744427081	654	0.372845344	0.4559028576
1	3971985	3973294	AT1G11760	0.2562299307	-	39	35	75.27999878	11.94000025	125.4919971	68.83999634	10.51700037	200.1394989	0.1787545788	0.5543321524	0.8225313568	654	0.3808884831	0.4594428253
1	3976838	3979237	AT1G11780	0.07586805386	-	40	38	81.38999939	17.21649971	191.2410019	85.0399971	15.80700006	219.0355064	0.1355263158	0.8397150677	0.9564589339	748	0.4542377455	0.4853547012
1	3981152	3985219	AT1G11790	0.2124817588	+	29	39	88.75	34.00200062	166.6120071	98.45999908	19.34200058	194.8445015	0.1794871795	0.6130815422	0.857005214	539	0.3735711617	0.4562966905
1	3985183	3987290	AT1G11800	0.1988247107	-	16	28	75.52999878	27.8287499	113.3587494	84.30000305	26.05799971	189.9479935	0.2232142857	0.632667156	0.8668756705	202	0.2999493165	0.4221730317
1	3991026	3993707	AT1G11820	0.4681260301	-	137	170	85.79000092	20.2	200.678006	72.61500168	16.60399961	239.659996	0.1062687849	0.3403094192	0.6781792342	11139	0.256616987	0.3999064979
1	3995157	3997965	AT1G11840	1.107199432	+	389	493	65.31999969	15.92800035	166.4209946	58.31999969	12.77500029	182.0080017	0.08560984894	0.07812689556	0.3466409729	87262	0.01083043648	0.0851989961
1	3999156	4000024	AT1G11850	0.2406223114	+	137	129	47	12.60199986	114.5840027	44.72000122	11.24200001	122.302002	0.09432467606	0.5746159656	0.83533684	8208.5	0.1584913342	0.3294703321
1	4001112	4003748	AT1G11860	0.2868631403	+	1410	2094	60.5	13.10024996	164.4449959	59.27500153	12.2632503	166.716753	0.02802942551	0.5165791338	0.7968245474	1435706	0.08359525195	0.2492424589
1	4003756	4007015	AT1G11870	0.2003077316	+	51	74	66.16999817	13.48250008	245.1274986	82.37000275	14.89275019	246.5052536	0.1327503975	0.6305104202	0.8664421007	1757	0.2576716562	0.4005964643
1	4010756	4013104	AT1G11890	0.7455824603	+	114	121	71.15499878	12.52049973	179.5307487	67.37000275	11.05000019	194.5399933	0.1407858489	0.1796459951	0.5172651621	6618.5	0.2967587357	0.4208183632
1	4014781	4016544	AT1G11905	0.1324200403	+	48	56	57.90500069	12.24950035	172.6042515	52.28000069	14.03375018	153.4750023	0.130952381	0.73719089	0.9175432083	1264	0.3020964862	0.4232109582
1	4016711	4021043	AT1G11910	3.90959378	-	1169	1340	72.51999664	13.16799965	204.3080017	63.53499985	13.31825004	197.007999	0.08767986415	0.0001231420049	0.00428923612	708912.5	2.015866405e-05	0.0007630369322
1	4028594	4030656	AT1G11930	0.3404583239	+	117	114	83.08000183	15.96800079	226.8430054	77	16.56100063	278.8955055	0.1106612686	0.4566060653	0.7601523091	6234	0.196098482	0.3581374872
1	4031533	4034155	AT1G11940	1.64019063	-	14	11	116.3050003	34.36724958	244.8452484	48.18999863	24.76000023	178.5749969	0.5649350649	0.02289862317	0.1824389709	39	0.02003951953	0.1224004041
1	4039565	4044046	AT1G11960	0.17142642	-	21	36	120	47.64500046	246.1999969	110.4699974	29.71250081	208.9637451	0.1904761905	0.673866055	0.8877588244	320	0.1707449087	0.3382878013
1	4049895	4053871	AT1G12000	2.396954403	-	134	172	75.13999939	11.72325003	177.6627525	50.35499954	13.25749965	180.2454971	0.2000173551	0.00400908807	0.05970501547	9527	0.004661106173	0.04965685401
1	4061362	4063549	AT1G12020	0.5601420308	-	30	39	52.53499985	12.9040003	153.9282505	54.88000107	11.46149998	113.0800011	0.2333333333	0.2753328113	0.6235528844	472.5	0.08759380944	0.255145495
1	4072740	4076207	AT1G12050	0.522312976	+	103	84	89.01999664	19.38550005	202.9269997	71.875	18.63900089	166.106004	0.140198798	0.3003910743	0.6470709457	3877	0.1115751125	0.2830269216
1	4084161	4085185	AT1G12080	0.06070479299	+	105	55	65.15000153	16.72799988	165.8340027	65.06999969	15.80600052	194.6844971	0.09696969697	0.8695512966	0.9676845644	2824.5	0.4111709245	0.4706914537
1	4089663	4090857	AT1G12090	9.356018254	-	2681	3955	53	10.89000034	138.6900024	46.20999908	9.680000305	145.0755051	0.08316009414	4.405363467e-10	4.743107999e-08	4871341	9.580504442e-09	7.527169301e-07
1	4105222	4109601	AT1G12110	0.4652758815	+	200	120	68.34499741	16.40400007	194.7619957	60.66499901	11.42449958	158.8604958	0.1066666667	0.3425501157	0.6793513346	10407	0.02343221409	0.131399395
1	4114673	4117614	AT1G12120	1.772584026	-	105	129	77.5	19.21799965	141.6660004	67.41999817	12.21599979	169.4599976	0.1995570321	0.01688169205	0.1534555309	5901	0.04540277125	0.1849059345
1	4121284	4124595	AT1G12140	0.6487585794	+	49	56	62.29000092	10.60400009	203.926004	77.80500031	12.24625027	218.2437458	0.1989795918	0.2245129625	0.570132308	1239	0.1973672847	0.3594003362
1	4137510	4140158	AT1G12200	0.1578200075	+	51	16	89.30999756	15.48250031	192.5525017	79.98000145	16.67000031	172.25	0.1948529412	0.6953124288	0.9001269258	392.5	0.4127048173	0.4711188684
1	4147961	4151056	AT1G12230	0.06152929067	+	398	319	71.40499878	13.66550004	213.1222511	73.30000305	17.40800047	212.409005	0.04445424615	0.8679020403	0.9670962663	62995	0.4300883413	0.4774197374
1	4153640	4157653	AT1G12240	2.126814619	+	190	277	86.56000137	12.0180002	193.5342514	69.80999756	9.782000065	204.3949997	0.1555766673	0.007467674528	0.09060321307	22899	0.008562911079	0.07395241386
1	4157653	4159046	AT1G12244	0.2346046119	+	16	28	108.5600014	19.78875005	162.5812511	76.88999939	20.51900048	173.8772549	0.2321428571	0.5826334144	0.8402313031	207	0.3436364192	0.4430749266
1	4159226	4161506	AT1G12250	1.109386164	+	112	199	104.875	17.15900011	195.0684952	85.97000122	14.85149999	238.1144951	0.1481963388	0.0777345047	0.3461247764	9848.5	0.04445554962	0.1830485591
1	4172034	4174730	AT1G12270	0.6924819736	+	104	97	78.43000031	13.77950029	170.5212444	68.18000031	10.78600006	239.3619995	0.1480967486	0.2030102782	0.5467397431	4760	0.2457377697	0.3928074874
1	4186652	4188233	AT1G12310	1.282189448	-	216	277	51.40499878	14.91000009	128.9637451	45.90999985	10.41299963	141.1310028	0.1211224763	0.05221683586	0.2827065468	27222	0.04305924683	0.1803648855
1	4194419	4196749	AT1G12330	0.04760865013	+	44	46	66.20999908	11.61825018	199.6382534	77.94000244	15.68249953	204.691246	0.1175889328	0.896171957	0.9775667933	981	0.4027688717	0.4674859893
1	4198336	4200849	AT1G12350	0.1832289567	+	50	57	109.6500015	21.79774938	207.042746	110.5500031	15.57000027	200.4600006	0.138245614	0.6557994428	0.8770744296	1392	0.4195960742	0.4736770297
1	4200863	4206486	AT1G12360	0.02329942304	+	56	85	94.15999985	17.78375077	207.2150021	105.0800018	16.63399963	216.0139954	0.08781512605	0.9477648044	0.9951427748	2317.5	0.3969546632	0.4653916832
1	4220043	4221803	AT1G12390	0.6564529379	+	51	59	85.90000153	21.24499989	148.2425041	74.58999634	13.75099993	201.8810051	0.1954137587	0.2205703143	0.5664262977	1394	0.2548380968	0.3991538769
1	4221778	4222875	AT1G12400	1.820511424	+	31	25	80.73000336	17.9000001	204.2099991	56.31999969	11.33799973	176.5080048	0.4038709677	0.01511779932	0.1440899758	256	0.01542103474	0.1040114803
1	4223029	4225254	AT1G12410	0.0967947744	+	311	390	75.79000092	11.74750018	199.8674965	71.60500336	11.43500004	200.3924973	0.04853656526	0.8002123055	0.9392425505	59757.5	0.3695703148	0.4542667676
1	4226238	4229211	AT1G12420	0.3728485733	-	15	11	65.29000092	21.34350004	129.3785053	98.68000031	48.09249973	132.6224976	0.3272727273	0.4237907046	0.7379654835	60	0.1267689031	0.3006152606
1	4233716	4238795	AT1G12430	0.8346181437	-	22	25	129.5650024	40.77600031	232.608498	104.5800018	13.92999992	552.1840027	0.32	0.1463463369	0.4698789405	206	0.07208666582	0.2337228837
1	4241420	4243229	AT1G12440	2.028411893	-	410	614	50.73999977	11.20300028	151.6084988	41.6099987	10.18200006	154.2840038	0.103606896	0.009366732278	0.1053234149	112666.5	0.00220495047	0.03052281436
1	4243903	4245993	AT1G12450	1.058673109	+	24	15	105.7799988	46.27174931	248.2342525	69.34999847	22.0500001	131.7240044	0.3916666667	0.08736286965	0.3672894792	105	0.0157527175	0.1052626311
1	4247217	4250758	AT1G12460	0.7092052581	+	33	67	61.70000076	22.30399971	123.7759979	74.31999969	18.72450037	214.9234978	0.2225237449	0.1953416006	0.5375407354	908	0.07435330908	0.2372749409
1	4250944	4257392	AT1G12470	1.539312525	+	67	66	77.55000305	19.99549932	271.3844948	59.38000107	15.25625002	175.3924999	0.2464947987	0.02888600452	0.2069285735	1720	0.01364539989	0.09722825373
1	4257267	4259300	AT1G12480	0.442329343	-	17	14	88.23000336	12.52200012	187.7119934	70.50500107	20.47225022	137.8127525	0.3151260504	0.3611358948	0.6908291629	84	0.08542929249	0.2521569915
1	4263149	4265156	AT1G12500	0.8035980154	-	58	115	83.21500015	14.40849981	172.6399933	71.31999969	11.95700016	196.3960052	0.1776611694	0.1571817011	0.4838280443	3029.5	0.1633608851	0.3330816516
1	4267073	4268982	AT1G12520	0.0803498274	-	94	109	105.579998	28.25825024	270.4549927	101.4199982	23.93400002	268.9050018	0.08617997267	0.831094049	0.9525273618	5058	0.438589535	0.480786449
1	4268985	4270907	AT1G12530	0.4354304488	-	25	28	76.11000061	21.33000069	142.8360001	70.56500244	13.86524966	138.0252506	0.2428571429	0.3669184508	0.695601389	318	0.2873140353	0.4161958843
1	4282793	4285876	AT1G12580	1.645365121	+	61	83	88.06999969	9.795000076	244.8250046	63.77000046	10.73049984	150.275502	0.2466916848	0.02262741171	0.1816558797	1839.5	0.002589129367	0.03412415154
1	4294551	4297178	AT1G12620	0.6283685667	-	16	11	91.64500046	45.59625006	168.6900024	58.88000107	21.1699996	114.8250008	0.3806818182	0.2353051505	0.582803109	56	0.0600432199	0.2143534277
1	4303279	4305907	AT1G12640	1.003228713	-	53	80	71.34999847	16.11500044	142.9539948	59.02499962	15.69400003	186.6397499	0.2117924528	0.09925931798	0.3903501588	1982	0.2637210029	0.4028309222
1	4305790	4308007	AT1G12650	0.005985323823	+	78	77	67.26000214	11.57850022	193.7754967	73.84999847	11.07499962	180.6350021	0.07126207126	0.9863128157	0.9999976789	2932.5	0.4010944829	0.4669577972
1	4319876	4323265	AT1G12680	0.02226869113	-	49	49	73.66999817	17.87599983	168.1480011	75.58999634	14.53999977	175.802005	0.1020408163	0.9500168514	0.9955656046	1170	0.415602521	0.4723051324
1	4326738	4328616	AT1G12710	0.1149385886	-	24	19	119.5099983	50.90975018	243.133992	118.2900009	21.57250042	223.464505	0.1951754386	0.7674700058	0.9291889778	202	0.2664376389	0.4037639023
1	4344942	4348390	AT1G12750	0.005182748243	-	22	34	162.284996	63.19824963	241.0707458	160.7100067	42.12775021	398.8667572	0.1176470588	0.9881372056	0.9999976789	358	0.3974178597	0.4654526956
1	4348497	4350993	AT1G12760	0.2154689315	+	90	134	89.00999832	27.84450068	220.3862553	88.69000244	21.54499946	200.1194981	0.1018242123	0.6088791021	0.8549319535	5923	0.4113932159	0.4708032216
1	4351018	4353797	AT1G12770	1.052212275	+	98	91	66.63000107	10.98025005	166.1322514	56.02999878	13.0875001	144.9324989	0.1781789639	0.08867224936	0.3696160437	3843	0.05071303363	0.1960409425
1	4355925	4358894	AT1G12780	1.926470784	-	211	250	84.25	14.40000033	220.4099998	67.47000122	14.2144999	192.8869968	0.1479052133	0.01184484047	0.1236815777	22340.5	0.002322286706	0.03160527834
1	4361550	4365414	AT1G12800	0.6560544717	-	279	317	98.68000031	16.01700087	231.6665054	91.43000031	14.20700006	249.2569992	0.08524134188	0.220772781	0.5664487859	40789.5	0.0509306362	0.1964315977
1	4367255	4368822	AT1G12810	1.441052361	+	126	136	69.22499847	15.5599997	182.2074966	53.25	13.40750003	195.7724972	0.1722689076	0.03621993269	0.2327656431	7615.5	0.06015863311	0.2144448115
1	4368759	4371298	AT1G12820	0.4788209337	-	103	102	94.33000183	17.49150009	163.4144997	87.43500137	14.66750009	238.6170044	0.1297353893	0.3320313309	0.6696811174	4835.5	0.1630701769	0.3328967726
1	4374204	4378514	AT1G12840	3.532640888	+	294	400	73.68000031	15.25000007	199.9259953	54.28000069	10.59975038	211.1727505	0.1598129252	0.0002933317765	0.008701178308	48324.5	2.988274718e-05	0.001056802263
1	4374248	4375247	AT1G12830	0.1387775897	-	38	50	54.32499886	11.84600031	113.2520002	50.17499924	12.37399986	123.4315029	0.1442105263	0.726477905	0.9138615185	935	0.4513906397	0.485055071
1	4378831	4379607	AT1G12845	0.001607610817	-	65	72	48.79000092	14.82199993	127.7919983	47.18000031	13.58199971	140.7537514	0.06816239316	0.996305182	0.9999976789	2300	0.432400732	0.4785189514
1	4379693	4381764	AT1G12850	0.3896131017	-	159	144	59.04000092	14.67449956	149.5710022	63.50999832	14.37650015	139.3854988	0.1007599581	0.4077433608	0.7252159721	11063.5	0.3070593433	0.4259503298
1	4384303	4386651	AT1G12860	0.7610335117	+	72	92	115.0900002	13.01474993	212.7392506	109.0600014	21.50600023	230.3507446	0.1702898551	0.1733670217	0.5076328888	2960	0.1220703641	0.2957653292
1	4392437	4394454	AT1G12900	10.37091634	-	4084	4593	73.18000031	17.30674925	181.264999	66.25	13.25800018	178.1160065	0.07519117901	4.256804024e-11	5.380230129e-09	8497486	1.897294421e-14	3.169790162e-12
1	4394896	4396291	AT1G12910	0.319294034	-	97	118	57.65999985	16.94599991	141.7500031	58.61999893	13.89899995	143.1322479	0.1131399616	0.4794087607	0.7748929418	5465.5	0.2856287971	0.4153275876
1	4396347	4398193	AT1G12920	0.2401420062	-	170	310	63.69499969	10.92250018	151.2672466	60.07500076	10.36050022	154.9595036	0.07362428843	0.57525181	0.8358319244	24776.5	0.1395629926	0.3125170386
1	4398321	4405669	AT1G12930	0.2180020443	-	21	26	138.6699982	28.52500057	359.230011	123.6749992	37.39750004	335.6125031	0.2142857143	0.6053380253	0.8523055344	248	0.3000517767	0.4221730317
1	4423539	4425936	AT1G12970	1.268375362	+	26	27	71.54499817	16.36000049	193.3237495	89.33999634	20.77600021	185.1334961	0.3547008547	0.05390445227	0.2881578572	242	0.02677655181	0.140453692
1	4433604	4436102	AT1G12990	0.03939835866	+	27	52	83.55999756	36.13499918	140.9169983	79.12000275	16.86250048	162.3192463	0.1282051282	0.9132751512	0.9824698011	664	0.349152872	0.445629013
1	4436100	4439639	AT1G13000	0.9545525117	-	33	45	112.8300018	12.74599998	253.0959961	71.51999664	13.47900038	191.412001	0.2666666667	0.1110318276	0.4099181137	584	0.05502387869	0.2049121385
1	4440403	4443954	AT1G13020	0.2972007589	-	34	62	70.125	19.13624935	166.6807461	66.89500046	21.75725007	167.7134991	0.1707779886	0.5044280646	0.7901259229	1005	0.355115896	0.4477796212
1	4444042	4447412	AT1G13030	1.182641773	-	16	16	113.5400009	22.35624981	201.741251	42.68499947	11.89125013	192.8212528	0.4375	0.06566867095	0.3186958705	79	0.03378134038	0.1586450166
1	4452189	4454900	AT1G13060	0.2763094597	+	226	354	69.19499969	13.04999995	195.2962513	64.70999908	11.78475001	184.742498	0.06814659267	0.5292861628	0.8065815031	37797	0.1313355136	0.3052494898
1	4459001	4460996	AT1G13080	0.3910816184	+	65	67	76.25	14.4960001	152.6859985	64.26000214	12.69049993	220.8234985	0.1513203215	0.4063669521	0.7244626087	2123	0.4029222153	0.4674859893
1	4461737	4463469	AT1G13090	0.3166302085	+	80	85	87.57500076	17.37649941	186.5769936	76.65000153	17.7789999	206.0530045	0.1279411765	0.4823583396	0.7767647314	3108	0.1709464388	0.3384236568
1	4463858	4465725	AT1G13100	0.6056280047	+	16	19	94.15500259	15.14874995	170.4925022	78.05999756	14.09849987	201.8729958	0.3289473684	0.2479545005	0.5952662631	123	0.1726539975	0.3400441537
1	4467093	4469033	AT1G13110	0.1371920616	+	144	159	69.77999878	12.12675002	165.6952496	64.15000153	12.99000001	180.126001	0.07809224319	0.7291349875	0.9146331221	11290	0.4180822495	0.4731137007
1	4469143	4473319	AT1G13120	0.9585298667	-	42	18	95.98500061	12.48574989	216.6607433	133.7050018	18.81350012	229.3992516	0.3253968254	0.1100196181	0.4087768788	282	0.06171385726	0.2172465283
1	4480859	4481334	AT1G13145	0.3744625438	+	54	46	62.85000038	21.25275044	151.2984982	60.47500038	21.97125006	127.5562439	0.1714975845	0.4222186922	0.7368111393	1197	0.3791315956	0.4587637895
1	4484583	4488577	AT1G13160	0.4063646464	+	42	42	93.75499725	17.9712503	244.9792534	69.34500122	18.63850083	205.4569996	0.1904761905	0.3923153975	0.7143564713	784	0.1915384647	0.3546935203
1	4488532	4492667	AT1G13170	0.8640795319	-	30	28	97.18500137	23.70775056	225.5324932	93.72999954	14.51550021	197.0017509	0.2928571429	0.1367478378	0.4548892019	393	0.3400397657	0.4419635155
1	4494923	4498469	AT1G13180	0.08839072273	+	17	19	107.0400009	18.07199993	204.623996	95.94999695	32.0675005	220.0819984	0.2012383901	0.8158480452	0.9462457179	153	0.3999408126	0.4663582965
1	4498763	4501624	AT1G13190	1.065286725	+	29	56	65.16000366	16.83100033	145.9779999	52.95999908	11.53999984	206.9375038	0.2777093596	0.08604255049	0.364827442	653.5	0.07151835176	0.2329346952
1	4501580	4503676	AT1G13195	1.584318129	-	24	19	97.89999771	34.86099882	192.8764957	50	8.7974998	170.763504	0.4320175439	0.0260424519	0.1963314514	153	0.034230751	0.1597251897
1	4508905	4514010	AT1G13210	0.854111215	-	58	20	94.125	28.29874978	157.1622467	79.77000046	19.51924953	121.7412506	0.2879310345	0.1399228959	0.46033936	412	0.02763480274	0.1431688116
1	4515463	4520306	AT1G13220	0.4750438749	+	18	19	73.96500015	17.0812505	304.5259911	113.9400024	17.41149936	349.641993	0.2953216374	0.3349316007	0.671017342	146	0.2282936794	0.38167111
1	4525413	4526204	AT1G13245	0.5380959823	-	998	1156	65.63499832	13.32024992	145.2347443	62.82500076	10.92750025	149.1650009	0.04220898544	0.2896703324	0.6382231744	548701	0.02528124274	0.1363498565
1	4528484	4530222	AT1G13250	1.038847413	-	60	61	78.58499908	17.30624998	161.1632526	63.93000031	10.46000004	139.2600021	0.2202185792	0.09144344662	0.3742307116	1406	0.01406539523	0.09847809232
1	4542167	4543970	AT1G13260	0.3199559979	+	215	207	79.84999847	17.93999977	155.2464981	79.23999786	10.71500034	159.1305016	0.08088978766	0.4786785889	0.7744427081	21297.5	0.2230105117	0.3777873496
1	4544888	4547373	AT1G13270	0.1078648301	+	88	72	84.25999832	13.2877501	218.4804951	85.61499786	19.39799962	165.1179996	0.1022727273	0.7800728628	0.9340517864	2978	0.2578624119	0.4005964643
1	4547387	4548894	AT1G13280	1.655195493	+	128	120	71.50500107	17.61724977	143.1622498	60.97500038	12.11999989	160.6802471	0.1875	0.02212098735	0.1799139056	6417.5	0.01269557082	0.09345743819
1	4563427	4567849	AT1G13320	0.3786145142	-	154	167	71.86500168	16.32199953	214.9437462	67.68000031	14.30699978	218.1969955	0.09709153122	0.4182014034	0.7344877362	11914	0.1277769213	0.3010339422
1	4572303	4576711	AT1G13350	0.03253229997	-	50	37	151.2549973	33.1382504	266.4034996	141.3899994	25.82699966	288.9859955	0.1145945946	0.9278284818	0.9884217793	877	0.3417068748	0.4427375771
1	4576872	4578369	AT1G13360	1.769697297	-	203	232	73.73999786	16.51299934	154.5119957	68.5	15.25574973	209.9732441	0.1465517241	0.0169942774	0.1541896517	21597.5	0.06802013273	0.2277028177
1	4588993	4590501	AT1G13380	0.3486780412	-	128	151	48.37000084	13.49150033	144.8967506	51.83000183	9.877500296	184.1724968	0.1018729305	0.4480453339	0.7546163301	9490.5	0.3983535632	0.4657162274
1	4592303	4594468	AT1G13390	0.7424156626	-	102	104	89.42000198	19.47624993	262.2215004	86.4849968	11.29099996	312.7587418	0.1498868778	0.1809607291	0.5194614948	4922	0.1862413912	0.3508773327
1	4608076	4610878	AT1G13440	11.12157846	-	3602	3461	50.77000046	11.46100004	172.6257549	44.04000092	10.83500004	169.5250015	0.08606602547	7.558254982e-12	1.144367043e-09	5549515	7.225478867e-16	1.400297804e-13
1	4612730	4615353	AT1G13450	0.1684817725	-	49	70	103.5899963	25.71999969	208.2680023	95.67000198	20.25774956	295.0599976	0.1306122449	0.6784505947	0.8905697998	1589	0.2490011605	0.3948109379
1	4615766	4618449	AT1G13460	1.097814891	+	31	48	74.54000092	36.77999878	137.1074944	63.70499992	19.91824918	147.4837444	0.2829301075	0.07983348886	0.351310857	533	0.01728024332	0.1111856293
1	4638467	4642190	AT1G13560	1.877306384	-	191	259	78.26999664	16.84999943	212.1150017	61.81000137	10.94700003	200.2075073	0.1491843377	0.01326458345	0.1326002204	20950	0.002758781172	0.03579831559
1	4642123	4644422	AT1G13570	1.624349033	-	42	32	114.6300011	24.96700025	177.2092506	75.81999969	27.92299981	166.1207508	0.337797619	0.02374930839	0.1861899663	470	0.01395513704	0.09803669254
1	4644520	4647142	AT1G13580	0.2409467872	-	26	29	100.7550011	33.9112494	187.2112503	101.1999969	17.62100086	189.8629974	0.2029177719	0.5741868113	0.8351830129	352	0.3397939114	0.4418415193
1	4677003	4679862	AT1G13640	0.05688042959	-	85	66	66.19000244	19.10100002	149.0769943	66.75	18.72499967	171.017498	0.09465240642	0.8772423112	0.9713764666	2782	0.4663670814	0.4896567492
1	4680289	4682382	AT1G13650	0.4759970947	-	31	85	82.04000092	31.96749926	243.6050072	106.6299973	14.48099966	181.922995	0.1924098672	0.3341972757	0.6710056954	1281	0.411145206	0.4706914537
1	4688017	4689265	AT1G13670	0.417681406	+	38	27	46.01499939	15.04250014	137.4699951	36.08000183	11.60499992	110.1775017	0.2202729045	0.382224564	0.7081328738	396	0.06046834425	0.2151610316
1	4693281	4694410	AT1G13690	0.001038756363	+	79	110	64.48000336	13.12299981	144.293998	63.64500046	14.93150017	153.389497	0.05719217491	0.9976110332	0.9999976789	4263.5	0.4135711688	0.4712864747
1	4694371	4696023	AT1G13700	0.08567565848	-	22	22	142.3600006	17.74325025	211.9482491	127.0099983	14.01925023	226.7840015	0.1818181818	0.8209644313	0.9482452328	223	0.3320557821	0.4379218593
1	4702656	4704694	AT1G13710	0.5646443498	-	23	19	62.40000153	17.53400021	239.0280037	62.45000076	22.34399996	93.88099899	0.295194508	0.2724931882	0.6198441477	182	0.1814793318	0.347307714
1	4709756	4712672	AT1G13730	0.1443912058	+	42	63	72.02499771	16.95800009	146.8159939	55.86000061	11.49449997	170.0675011	0.1349206349	0.7171480043	0.9102118619	1265	0.3534189332	0.4470412756
1	4713432	4715407	AT1G13740	0.5253291412	+	22	33	67.47999954	19.11424956	136.6505009	50.15000153	14.44199972	158.7899994	0.2575757576	0.2983120928	0.6458923722	295	0.1230928726	0.2966707782
1	4721573	4724520	AT1G13770	0.1691603138	+	33	18	71.19000244	6.738000107	225.826004	78.81999969	19.55825038	224.3082489	0.202020202	0.6773914119	0.8899027631	269	0.293896728	0.4194966036
1	4724543	4726558	AT1G13780	0.1430993949	+	16	12	118.6650009	47.98999977	170.1824989	118.8349991	23.0047502	166.0910034	0.25	0.7192843399	0.9105834652	86	0.3295969322	0.4365890285
1	4733990	4735453	AT1G13810	0.1604508271	+	22	37	73.98500061	13.73475029	119.0432497	60.45999908	12.05399976	152.2200058	0.1842751843	0.6911131762	0.8980269995	361	0.2378595514	0.3883888236
1	4735473	4737910	AT1G13820	1.875593566	+	149	162	82.16999817	14.90300026	195.4390015	66.9600029	12.61950037	182.3947525	0.1770237799	0.01331700106	0.1328028643	10262.5	0.01131229797	0.08755284932
1	4743203	4746956	AT1G13860	0.885560946	-	20	23	114.2999992	49.05999794	234.5567493	125.0800018	20.37800016	197.9614967	0.3413043478	0.1301484661	0.4444802526	191	0.174264684	0.3412742095
1	4747185	4748666	AT1G13870	0.3519944334	-	37	56	74.19999695	21.29900045	143.0109985	79.52999878	16.52874994	150.3275032	0.1776061776	0.4446369666	0.7514008034	1025	0.4671572332	0.4898540392
1	4748830	4751234	AT1G13880	0.07410263117	+	55	58	80.48000336	14.07200017	145.0189972	78.18999863	14.22250035	146.4242504	0.1128526646	0.843135487	0.9578660717	1545	0.388072385	0.4624866656
1	4753098	4755656	AT1G13900	0.6088268589	-	58	53	76.55999756	18.76299992	163.7319996	57.86999893	12.10600004	156.4939972	0.1893298634	0.246134868	0.5937876027	1267	0.05579686405	0.2063207414
1	4760956	4762666	AT1G13930	1.582161681	+	1900	2048	50.98500061	11.05224984	128.435751	48.38999939	10.17175012	146.2250008	0.04671772204	0.02617208482	0.1970985419	1893031	0.07091222331	0.2320371827
1	4762478	4766852	AT1G13940	0.7239915605	-	34	46	76.99000168	12.27200003	144.71875	93.72999954	34.5387516	170.3174934	0.2378516624	0.1888028038	0.5297777516	573	0.02121635859	0.1258179405
1	4773433	4774935	AT1G13950	0.7078517642	+	41	31	107.1999969	32.31000137	217.6499939	71.43000031	15.7099998	254.8624992	0.2478363493	0.1959513391	0.5384031596	511	0.07924156759	0.2435044789
1	4776282	4779420	AT1G13960	0.009853751104	+	49	65	87.65000153	15.88600044	177.9200043	83.40000153	17.82000046	235.5859985	0.08759811617	0.9775663615	0.9999976789	1579	0.470342142	0.4908797641
1	4788462	4794654	AT1G13980	0.2800299483	+	96	87	73.56999969	23.30124998	178.5225029	75.08999634	22.26799974	169.6789978	0.117816092	0.5247712715	0.803322847	4000	0.3119201944	0.4286838148
1	4794663	4796599	AT1G13990	0.5868917419	+	80	64	93.21500015	18.15699987	239.8582497	82.15499878	13.77175035	218.0564972	0.165625	0.2588858168	0.6072898435	2323	0.1708453901	0.3383503557
1	4797357	4800283	AT1G14000	0.8272877609	+	99	127	69.83000183	13.8980001	189.6965004	58.77999878	12.54450045	204.0000031	0.1500835123	0.1488374563	0.4726572924	5311.5	0.02284715391	0.1297200711
1	4800168	4801850	AT1G14010	0.08786032072	-	65	61	64.63999939	11.64199982	128.5440018	53.66999817	15.27000046	171.3499985	0.1102143758	0.8168450456	0.9464203059	1949.5	0.4369706251	0.4804408961
1	4802719	4805375	AT1G14020	0.3146327965	+	23	36	103.3600006	28.09349928	206.7425011	94.32999802	19.31499982	257.8512497	0.2149758454	0.4845819168	0.7785341175	372	0.2594692657	0.4014033556
1	4805305	4807517	AT1G14030	0.1795430332	-	81	95	106.5400009	30.70999908	237.2599945	102.1100006	12.08750024	206.4104996	0.1081221572	0.6613889988	0.8798562916	3464.5	0.1281134787	0.3014009253
1	4816927	4818112	AT1G14060	0.727418681	-	44	51	44.69000053	19.6152492	126.7995022	64.12000275	15.25999975	149.7900009	0.2174688057	0.1873187793	0.5273869209	972	0.1322547482	0.3059347294
1	4833395	4835089	AT1G14120	0.8635198294	-	48	45	111.1599998	13.60025005	249.6255009	71.26999664	11.7	197.8509933	0.2333333333	0.1369241869	0.4552193867	860.5	0.046127011	0.18685687
1	4835723	4837771	AT1G14130	1.124207333	-	28	15	70	17.63724983	152.498748	38.22999954	6.394500113	212.0090034	0.3904761905	0.07512641541	0.3399622215	147	0.05561964863	0.2060223223
1	4837926	4839633	AT1G14140	0.4017431852	-	40	47	66.67500305	10.65200031	161.8980072	78.43000031	11.14199967	155.3829956	0.1872340426	0.3965124378	0.7177220777	771	0.07563490234	0.2390242235
1	4839800	4840823	AT1G14150	0.1266793095	+	168	290	74.25	12.25324988	185.1064987	68.2899971	10.53999996	200.9264961	0.06494252874	0.7470001525	0.9207387927	23772.5	0.3335976736	0.438524447
1	4843183	4845913	AT1G14170	0.08587747215	-	14	19	55.69000244	21.09324965	154.1447487	56.20000076	13.62799964	154.7769974	0.2105263158	0.8205830234	0.9482452328	122	0.3510556474	0.446529382
1	4852521	4854307	AT1G14190	0.5731553839	+	14	14	54.49500084	30.75549951	131.1332447	48.84000015	17.41500039	211.9960047	0.3571428571	0.2672050219	0.6151737662	76	0.1616069055	0.3319410588
1	4854223	4855287	AT1G14200	0.4275164397	-	37	34	53.88000107	16.39399991	189.7040009	63.83499908	8.241250038	260.0337498	0.2098569157	0.3736659804	0.7018006235	564	0.2289195042	0.3821020892
1	4856777	4857975	AT1G14210	0.01490707627	-	96	66	63.56999969	14.46999991	200.3725014	62.32499886	17.13124943	182.8762474	0.07765151515	0.966257602	0.9992567944	3102	0.4116625931	0.4708032216
1	4861167	4864094	AT1G14230	0.2559465042	+	54	49	113.9900017	17.52124934	243.3112461	102.7799988	15.92200012	182.8980011	0.1523053666	0.5546940352	0.8225313568	1298	0.4357365759	0.48000309
1	4868345	4871488	AT1G14250	0.2179575447	+	95	113	70.48000336	13.24899998	181.8525002	74.95999908	12.36800022	200.3659973	0.1042384723	0.605400054	0.8523055344	5095	0.2646579327	0.4031625057
1	4874874	4877256	AT1G14270	0.2147139061	-	144	137	118.9750023	31.20424991	227.5182514	125.8799973	19.58800049	252.6380005	0.08931467964	0.6099385654	0.8553436256	9682	0.3949024604	0.4646908795
1	4877505	4879307	AT1G14280	0.2282425806	+	375	383	67.91999817	13.36699982	177.3385002	64.37000275	12.9934999	156.2214973	0.05552654482	0.5912313023	0.8442357448	69538	0.2252817992	0.3793101909
1	4880029	4882265	AT1G14290	1.899059263	-	59	102	80.27999878	15.2200006	153.9410034	57.56999969	16.04600048	170.8139969	0.2545696245	0.01261655359	0.1286888466	2342.5	0.009730389231	0.08025786075
1	4882335	4884818	AT1G14300	0.7970649034	-	33	67	80.23000336	18.98000031	181.3359985	58.11000061	9.56950016	154.0639977	0.2320217096	0.1595640668	0.4883688588	876	0.04660554194	0.1876912459
1	4884950	4886793	AT1G14310	0.5714418217	+	39	37	121.4800034	20.5640008	283.129512	103.4400024	14.14700036	195.2599945	0.2224532225	0.2682613948	0.6164710472	573	0.06201674197	0.2174689196
1	4888113	4889704	AT1G14320	19.96672633	+	1648	2635	68.35499954	14.13175015	185.6047543	52.25	12.34400039	165.145993	0.1511194064	1.079626845e-20	3.736280046e-18	1758632.5	5.375029268e-26	2.367456073e-23
1	4890068	4892332	AT1G14330	0.3985601428	-	35	29	64.22000122	12.17699995	145.1284996	71.91999817	17.34099979	198.4710037	0.2167487685	0.399429243	0.7203013857	400	0.07450163874	0.2374223341
1	4897345	4899035	AT1G14340	0.4272000089	+	29	27	73.56999969	15.56300039	159.562999	50.75999832	16.54349961	130.0355011	0.2349936143	0.373938336	0.7018515796	313	0.100450409	0.2696072335
1	4899044	4900054	AT1G14345	0.7657818404	+	382	404	56.97999954	13.36524978	136.3529991	55.94000053	13.15449965	168.8262543	0.07836555907	0.1714818498	0.5047567206	75168	0.2652514268	0.4033765876
1	4907886	4911168	AT1G14350	0.4927881671	+	22	41	89.93000031	11.45374994	179.6179962	84.16000366	18.67000008	193.6199951	0.2427937916	0.3215228427	0.6620649242	418	0.3196861026	0.4325989643
1	4911092	4913167	AT1G14360	0.5421762991	-	50	56	88.88999939	17.64925008	188.2402527	63.39500046	10.20249975	234.3974953	0.1864285714	0.2869615443	0.6351432993	1187	0.08933443657	0.2573277914
1	4915490	4918138	AT1G14370	0.53289153	+	33	26	83.12000275	11.75799961	157.5040039	99.65499878	20.85375047	317.3787479	0.2470862471	0.2931625361	0.6415413222	346	0.1039106945	0.2741645796
1	4918009	4921682	AT1G14380	1.525791986	-	86	102	80.63500214	15.03125012	159.616251	59.39500046	9.498000026	159.0432514	0.2081623347	0.02979943388	0.210258684	3384	0.003525807661	0.04238843205
1	4926485	4928812	AT1G14400	2.002477921	-	435	489	75.45999908	14.20650024	200.4254944	61.75999832	10.51599998	194.9579956	0.1064381919	0.009943106221	0.1097365595	93506.5	0.0007530210759	0.0141960588
1	4928920	4931080	AT1G14410	0.3073793998	-	53	69	83.87999725	17.53700027	181.6939972	84	19.1460001	229.8459991	0.1482089144	0.4927431553	0.7836999681	1748	0.3397282105	0.4417956105
1	4938753	4941332	AT1G14440	0.6988389125	-	50	60	76.84000015	12.24699998	205.227005	60.54999924	12.5624999	184.0137489	0.2	0.2000603791	0.5436311061	1228	0.05156990116	0.1976189068
1	4946191	4947670	AT1G14450	0.1027481971	-	172	338	48.875	13.41875038	132.603751	49.20000076	12.29825029	169.855743	0.06030686666	0.7893176295	0.9360910366	28871.5	0.4504319487	0.4847815632
1	4948637	4953284	AT1G14460	0.2607374332	-	28	29	95.63000107	17.79925036	146.4095039	89.11000061	20.37399979	172.662001	0.2032019704	0.5486085437	0.8187724801	381	0.3478693547	0.4447428157
1	4961593	4964515	AT1G14510	0.09030259878	-	163	179	80.54000092	19.20249968	191.3620003	82.87000275	16.46399994	165.5475037	0.06796449258	0.8122643661	0.9441233555	14364.5	0.4033297613	0.4676267831
1	4968133	4970311	AT1G14520	0.003051291507	-	13	19	93.77999878	15.9000001	172.373999	68.69000244	10.46649995	197.8389984	0.1457489879	0.9929987653	0.9999976789	118	0.4239309979	0.4757672923
1	4980623	4983367	AT1G14560	0.1112602562	+	41	49	129.5200043	41.88000107	291.2099915	113.1500015	26.56000061	278.8339874	0.1358885017	0.7739978314	0.9309879575	964	0.3729422029	0.4559820759
1	4983488	4987375	AT1G14570	0.6341467701	+	152	133	80.15499878	19.49524937	224.9737511	90.15000153	11.72400026	243.5289978	0.1212406015	0.2321951958	0.578824036	10085	0.4870706499	0.4968653286
1	4989561	4992805	AT1G14580	3.25837857	+	204	155	82.45499802	20.39499922	177.4824989	62.36000061	12.60499997	144.4344994	0.2127134725	0.0005515964082	0.0137756938	11269	1.566569139e-06	8.433363867e-05
1	4998766	5000710	AT1G14590	0.1463664275	-	35	33	75.58999634	36.40199947	134.1190002	78.33999634	29.79199886	161.0239929	0.1636363636	0.713893738	0.9082046662	559	0.4125946783	0.4711188684
1	5000985	5003637	AT1G14600	0.02499347977	-	36	19	120.5849991	21.14375079	224.0274982	110.0299988	19.76900063	253.0925003	0.1432748538	0.94407505	0.9933495621	338	0.4753015922	0.4930506044
1	5008152	5014533	AT1G14610	0.5480701739	-	123	181	91.58000183	13.29599977	198.4294952	76.33000183	12.55499983	195.6349945	0.1136863855	0.2830934533	0.6317769604	9889.5	0.04942802998	0.1937718163
1	5014674	5016708	AT1G14620	0.05857504926	-	62	80	64.58499908	17.48700051	193.9704994	70.09000015	16.0452491	197.366254	0.09798387097	0.873825976	0.9698035184	2412.5	0.391433063	0.4632166269
1	5027315	5031883	AT1G14650	0.2986640108	+	84	107	72.58499908	23.1807508	233.8817516	73.51999664	13.96100073	219.6035011	0.1180462839	0.5027313741	0.7894555448	4434.5	0.4381810699	0.480786449
1	5031942	5036610	AT1G14660	1.442074821	-	12	11	145.0799942	71.1545002	198.2847462	192.3300018	55.80750084	367	0.553030303	0.03613476035	0.2326035171	40	0.05827545977	0.2115997521
1	5037575	5040597	AT1G14670	0.5153387153	+	289	335	61.09000015	13.60600033	168.147995	55.66999817	11.86149998	178.5224953	0.07696121469	0.3052539446	0.6513585722	45357	0.08719243252	0.2546854585
1	5042239	5045556	AT1G14685	0.201290288	+	141	120	77.04000092	17.88499928	272.75	78.31999969	17.39299955	181.4852501	0.0914893617	0.6290855535	0.8656403029	8363	0.4369252348	0.4804408961
1	5051655	5055299	AT1G14690	0.5553287988	-	47	76	100.2300034	12.725	242.7485039	81.97000122	11.0137496	187.7750053	0.1794512878	0.278401263	0.6270279054	1586	0.1495406686	0.3214166045
1	5058582	5061140	AT1G14700	1.012771641	+	80	84	86.00999832	16.45574992	247.3265022	67.64499664	14.85050008	198.886747	0.1880952381	0.09710204117	0.3861499777	2884	0.05887589527	0.2125586532
1	5061693	5065303	AT1G14710	0.1581208623	-	76	115	83.44500351	10.27125025	190.3275051	86.62000275	14.95650024	192.3445015	0.1028604119	0.6948309223	0.9001269258	4232.5	0.357049177	0.4486951345
1	5066524	5068677	AT1G14720	1.723976282	-	133	170	68.5	11.56500015	166.7190033	55.13999939	12.56575012	175.3937489	0.1740822645	0.01888094462	0.1635485876	10313.5	0.09519686564	0.2633693318
1	5073030	5074798	AT1G14730	0.2490339451	+	32	18	69.24499893	14.10124979	197.9047535	90.59500122	12.76900024	198.9742531	0.2222222222	0.5635936028	0.8279805001	257	0.2688005251	0.4051273148
1	5075178	5077981	AT1G14740	0.02176441183	-	49	40	70.44000244	8.25	143.023996	70.07500076	15.72099974	234.819257	0.1071428571	0.9511206003	0.995748734	947.5	0.3959158986	0.4647712863
1	5086594	5088898	AT1G14770	0.2281841345	-	15	21	80.40000153	29.17800016	173.9169937	71.33000183	9.474999905	145.5400009	0.2476190476	0.5913108739	0.8442357448	120	0.1175677298	0.2905214133
1	5102423	5104850	AT1G14810	1.246037341	-	178	259	91.20000076	21.68399959	207.8857529	76.87000275	12.15549994	218.7685013	0.1283024598	0.05674958098	0.2955410819	20720	0.03620233273	0.1648755792
1	5104974	5107107	AT1G14820	0.03579032008	-	50	46	80.70000076	16.38649986	181.9679962	77.1649971	26.4799993	170.7150021	0.1095652174	0.9208940775	0.9860180785	1105.5	0.3734623455	0.4562966905
1	5107415	5111746	AT1G14830	2.353958557	-	132	171	94.6400032	15.03825016	237.3960041	68.43000031	15.56499982	193.5725021	0.1994949495	0.004426306084	0.06408003878	8987	0.001184543362	0.01972203639
1	5111700	5115514	AT1G14840	1.048744227	-	51	76	94.61000061	25.50250006	189.1150055	68.75500107	14.48124969	153.3324966	0.2200722394	0.08938317411	0.3704782174	1395.5	0.003842644994	0.04422236341
1	5116522	5123559	AT1G14850	0.3649022081	-	39	32	88.34999847	20.12550058	292.7729935	81.92500305	23.84074941	199.7520069	0.2011217949	0.4316162547	0.7439276962	565	0.2495073503	0.3953599493
1	5124669	5126280	AT1G14860	0.9725356515	+	41	12	95.58999634	15.72000027	181.1199951	64.20999908	15.68500013	150.483004	0.3780487805	0.106528141	0.4031206795	181	0.08522022501	0.2517399869
1	5128343	5129731	AT1G14870	0.2910648317	-	179	27	62.08000183	12.95299978	179.0914993	78.43000031	13.68549972	188.4220039	0.164494103	0.5116054571	0.7945491313	2290	0.3312793548	0.4375813725
1	5136873	5137982	AT1G14890	0.8397274617	+	234	122	51.17500114	10.04250035	133.3247478	42.03499985	10.26599977	158.6139954	0.1261034048	0.144634713	0.4667303021	13292.5	0.1435554953	0.3167242144
1	5138115	5139467	AT1G14900	1.122340411	-	225	214	63.04000092	12.7460001	167.0660004	57.36499977	12.43274975	194.4125027	0.1207268951	0.07545005992	0.3405796959	22379.5	0.1010373498	0.2703567523
1	5139711	5143735	AT1G14910	0.05521203286	-	110	137	87.07499695	18.43350034	182.0995007	85.04000092	15.11000061	181.2619995	0.07392169874	0.880618829	0.9724809816	7390.5	0.3981917352	0.4656473459
1	5148981	5151415	AT1G14920	1.784032036	+	345	409	69.13999939	18.11199989	167.8299957	62.88000107	11.1	143.7140015	0.1122072216	0.01644250429	0.1508786615	61231.5	0.0008796020323	0.01592156356
1	5165488	5166939	AT1G14980	4.833293042	-	359	583	54.54999924	10.11549988	161.006002	39.88000107	11.13050027	145.4715027	0.1617271151	1.467935446e-05	0.0007041729939	85151	7.640676542e-07	4.460129861e-05
1	5166912	5168336	AT1G14990	0.6685168705	-	30	37	76.15999985	30.51699924	206.0140038	97.23000336	30.79600086	275.2890076	0.2504504505	0.2145275779	0.5600140706	453	0.1003084605	0.2695476934
1	5168595	5170066	AT1G15000	0.8484625635	+	67	40	56.04000092	12.84100022	168.3754959	50.15499878	15.90750008	197.7177494	0.2235074627	0.14175469	0.4635330526	1173	0.1418423524	0.3152895843
1	5171180	5171956	AT1G15010	0.1001379063	+	30	16	55.92000008	9.305000037	130.8775007	42.73500061	15.01625013	132.9150009	0.1916666667	0.794076043	0.9381387535	225	0.3690322441	0.4542439836
1	5172231	5176479	AT1G15020	0.1154821362	-	63	44	91.93000031	13.94899983	176.7825012	80.54999924	11.34200039	220.7195026	0.1273448773	0.7665100684	0.9287428465	1355	0.4234403789	0.4755116502
1	5177479	5180049	AT1G15030	0.9282191043	+	55	80	126.8399963	32.82249947	292.3460098	96.36500168	21.45474968	262.4272476	0.2034090909	0.1179725307	0.4246485224	1742	0.02024398459	0.1230641221
1	5183257	5187106	AT1G15060	0.06356514998	-	75	84	102.4800034	20.09700041	193.918499	101.7999992	12.31274989	205.9339996	0.09333333333	0.863843063	0.9648892239	3116	0.4539903027	0.4853547012
1	5187548	5189673	AT1G15080	0.4897861445	+	18	11	89.93500137	37.88600087	156.1419987	68.91999817	28.5175004	190.9274998	0.3434343434	0.3237530403	0.6624994158	73	0.1258686629	0.2998198977
1	5193283	5194214	AT1G15100	2.370769101	-	49	53	77.55999756	53.54399948	147.0139954	67.04000092	17.24199963	139.8709969	0.3380824028	0.004258247484	0.06258202951	955	0.01079895487	0.0851989961
1	5198939	5202315	AT1G15110	0.4360297536	+	38	12	112.2800026	26.41450062	184.1319977	102.7299995	19.32425013	193.7749989	0.2894736842	0.3664124708	0.6949648938	221	0.4413090916	0.4816359548
1	5202592	5204494	AT1G15120	0.5147350375	+	411	511	67.79000092	14.60249972	177.9100037	62.11999893	13.48000002	166.2849998	0.06361268635	0.3056785485	0.651471804	99066	0.06958421433	0.229812896
1	5206001	5209979	AT1G15130	2.037670517	-	115	111	92.77999878	17.54400001	196.0450027	60.75	10.41749978	221.0649948	0.2144927536	0.009169158555	0.1037957318	4884	0.001150113218	0.01923693397
1	5210180	5212349	AT1G15140	0.3274816696	-	122	207	90.22999954	20.77824998	190.6360065	89.83999634	15.98350029	177.3280014	0.09519284074	0.470455262	0.769446071	12056.5	0.2469937068	0.3938621533
1	5220402	5222973	AT1G15170	0.9409211656	+	21	19	50.43999863	23.65499973	237.1800079	76.48000336	21.23899946	182.4154953	0.3609022556	0.1145720897	0.4173697554	166	0.1857222541	0.350621937
1	5224293	5226778	AT1G15180	0.7068471162	+	98	163	79.10000229	18.87875004	230.4762535	73.69000244	13.51199956	212.4560066	0.1353449355	0.1964051556	0.5387425802	6965	0.04184166095	0.1772052861
1	5228299	5231184	AT1G15200	0.6198691621	-	52	48	112.6399994	15.96700056	326.4152596	90.68000031	10.72600002	248.1329952	0.2003205128	0.2399555713	0.5874015764	1067	0.1065050247	0.2769433913
1	5238043	5240051	AT1G15215	0.311516457	+	21	12	112.4599991	28.99999905	219.75	123.4150047	13.56800029	189.9485008	0.2857142857	0.4880716061	0.781207334	115	0.3471772365	0.4442228612
1	5240028	5241541	AT1G15220	0.1562280733	-	35	37	79.55999756	20.43149986	128.6615017	72.76000214	16.56000042	190.0920059	0.1613899614	0.6978658179	0.9011913173	585	0.2424224312	0.3910932298
1	5242072	5243262	AT1G15230	0.8121510546	-	95	75	58.36000061	14.9105	109.7404991	53.66999817	7.108500099	125.9349972	0.1712280702	0.1541164318	0.4806493453	3208	0.1332897536	0.3065453431
1	5243382	5248693	AT1G15240	0.171429367	+	38	42	118.9049988	25.61699986	221.2182503	122.4150009	21.61100059	230.3247513	0.156641604	0.6738614823	0.8877588244	726	0.2454523203	0.3925680345
1	5248663	5249676	AT1G15250	0.1877002055	-	200	195	74.15999985	15.33799989	159.6539936	67.02999878	15.73300004	201.1014938	0.07320512821	0.649082342	0.8740754854	19161	0.3827066295	0.4598744097
1	5249759	5250573	AT1G15260	0.2089535108	+	169	222	43.70999908	11.60999985	151.0319946	46.82999992	11.1420001	148.8325005	0.07609680687	0.6180825594	0.8605223371	18381	0.3665546239	0.4531273566
1	5250649	5252121	AT1G15270	0.211536335	-	381	568	51.58000183	11.8499999	145.3800049	49.74500084	10.57050033	163.4377472	0.04974862297	0.6144176246	0.8580104559	107067	0.3918212101	0.4634362626
1	5252284	5256863	AT1G15280	0.3172400018	+	97	113	119.4800034	16.89799995	310.0720032	116.1600037	15.14599991	254.026001	0.1140406897	0.481681535	0.7761843056	5471.5	0.4922762813	0.4985713999
1	5256869	5265155	AT1G15290	1.055111821	-	104	93	116.5349998	41.72224989	258.2407425	109.75	21.12999935	237.3399979	0.1749379653	0.08808220514	0.3683976509	4306	0.09250962111	0.2613578613
1	5275615	5277869	AT1G15340	0.5484300266	-	174	235	58.07500076	8.477249932	143.186002	55.04000092	7.677999926	172.0675049	0.09755441428	0.2828589816	0.6315001689	19777	0.2861283769	0.4156342996
1	5278026	5279988	AT1G15350	1.743077659	-	120	115	102.1100006	24.55225005	205.2087547	76.51999664	14.89599996	180.5860008	0.1967391304	0.01806851003	0.1601376789	5667	0.008995013806	0.07663688491
1	5286865	5288640	AT1G15370	2.212473547	+	108	143	56.83500099	12.51599998	133.1654949	46.47999954	8.679500437	164.0005043	0.2132219632	0.006130931349	0.0805464925	6684.5	0.03430995747	0.1599920538
1	5290581	5292582	AT1G15380	1.029031994	+	207	84	65.62000275	15.44750009	179.6860031	50.72000122	12.50450034	159.0732487	0.1573498965	0.09353367674	0.3788996019	7745.5	0.07250097263	0.234282267
1	5294628	5295931	AT1G15390	0.3654447401	+	91	102	66.34999847	12.07500029	148.2824974	65.17499924	10.91449986	139.9035004	0.1234647705	0.4310774051	0.7434039966	4068	0.06971745576	0.2299916522
1	5295755	5297075	AT1G15400	0.9016389336	-	222	184	47.20499992	11.38899992	131.492757	39.99499893	11.00624986	134.2352461	0.115795143	0.1254183452	0.4370548185	18521.5	0.0530562362	0.201140426
1	5297846	5298571	AT1G05163	0.2565945253	-	51	32	36.13000107	11.19250035	104.6125011	29.36500072	7.358499837	73.55449963	0.1734068627	0.5538669803	0.8225313568	666	0.08094784901	0.2457491015
1	5297874	5298166	AT1G15405	0.2565945253	-	51	32	36.13000107	11.19250035	104.6125011	29.36500072	7.358499837	73.55449963	0.1734068627	0.5538669803	0.8225313568	666	0.08094784901	0.2457491015
1	5298323	5300927	AT1G15410	0.2114914371	+	39	61	72.30999756	15.53400004	284.5164963	80.04000092	14.66499996	233.6450043	0.1509037411	0.6144811471	0.8580104559	1109	0.2859149379	0.4155845151
1	5301515	5303522	AT1G15420	0.9674944924	-	55	48	94.36000061	18.31399984	186.3384956	72.24000168	9.238749576	233.6157455	0.2321969697	0.1077718921	0.4051208863	1067.5	0.04785719389	0.1906118161
1	5304097	5306087	AT1G15430	0.1035370889	+	24	41	74.51499939	10.65199969	148.421003	64.45999908	14.36999989	146.3999939	0.1615853659	0.7878851429	0.9356136072	457	0.3195474158	0.4325989643
1	5306026	5309558	AT1G15440	0.09564452041	-	59	35	92.59999847	25.61500034	212.7610054	89.62000275	30.67100129	231.1905006	0.1331719128	0.8023345231	0.9400993385	970	0.3138703551	0.4294489308
1	5315498	5317941	AT1G15470	0.09079874492	+	23	30	83.16000366	18.09350057	150.3805035	91.28499985	10.54175014	177.7092468	0.1695652174	0.8113369499	0.9439941626	341	0.4749584149	0.4929677635
1	5317972	5320630	AT1G15480	0.1272191825	+	15	35	68.65000153	19.69100008	158.1315048	55.56999969	12.99700041	254.5105049	0.2	0.7460721309	0.9203746099	252	0.4161695885	0.4725511075
1	5320614	5323895	AT1G15490	0.9574210922	-	20	18	145.8099976	24.04399955	246.7165016	96.61499786	15.94849975	168.4382553	0.3722222222	0.1103008623	0.409502068	104	0.01364785643	0.09722825373
1	5326289	5328875	AT1G15500	4.386100398	+	462	543	76.75999832	15.14749963	194.0527493	62.75	14.17400007	160.5650002	0.1458587453	4.110546848e-05	0.001741889167	106215	1.391593156e-05	0.0005665772137
1	5329063	5331711	AT1G15510	0.2496341062	+	22	22	82.25	17.4397501	115.7805029	66.59000015	17.3125001	216.629504	0.2272727273	0.5628152983	0.8276981478	219	0.2986966769	0.4216010059
1	5361864	5365559	AT1G15570	1.139926048	+	16	24	75.78499985	26.80124986	182.4362555	112.795002	26.15400085	234.1689896	0.3958333333	0.07245593279	0.3349704145	119	0.02266542321	0.1292943196
1	5365511	5366497	AT1G15580	0.1878280046	-	49	56	65.08000183	20.91999969	185.6119995	66.66500092	10.9799999	182.2425041	0.1403061224	0.6488913657	0.8740754854	1274	0.2655742996	0.403609624
1	5381031	5385380	AT1G15660	0.9143324982	+	29	30	85.23000336	12.77900009	150.8300049	97.41500092	12.30499967	203.8437527	0.2965517241	0.1218056691	0.4313950781	361	0.1325529274	0.305964237
1	5389951	5391672	AT1G15670	1.202252609	+	101	52	71.51999664	11.36000013	177.465004	55.61499977	12.88699994	156.854995	0.2193450114	0.06276931525	0.312128634	2281	0.09226076038	0.2609718361
1	5398925	5402733	AT1G15690	7.709566904	+	711	1206	78.06999969	17.40250063	166.0474968	63.20499992	13.43875027	189.1274986	0.1427461847	1.951790032e-08	1.639842087e-06	362979.5	9.737592596e-09	7.60945744e-07
1	5402568	5403818	AT1G15700	0.1942112458	-	21	22	48.43999863	20.20499945	116.6100006	62.52000046	11.96200008	104.1084986	0.2164502165	0.6394237368	0.8698245763	219	0.3899572031	0.4626325053
1	5404129	5405910	AT1G15710	0.157020823	+	49	65	63.33000183	14.52399979	193.4100006	52	12.40600014	121.0160004	0.1306122449	0.6965931139	0.900156492	1487	0.2739191583	0.407514326
1	5407400	5410043	AT1G15730	0.2261203584	-	97	173	92.5	14.38600025	236.6959991	81.68000031	14.02200012	201.5829956	0.09600143019	0.5941274821	0.8459681575	8029	0.2787985806	0.411186134
1	5410907	5414919	AT1G15740	0.9152058474	+	203	121	94.62000275	16.25699978	251.4149956	86.91000366	13.81000042	218.4799957	0.1338598705	0.1215609688	0.4310535939	10979.5	0.05527735304	0.2053824965
1	5414816	5421033	AT1G15750	0.9362932385	-	198	202	115.8900032	21.18849955	309.3767448	101.5499992	19.61300039	250.6222439	0.1178117812	0.1157995206	0.4199466148	17337	0.01068729427	0.08497802088
1	5430039	5436618	AT1G15780	0.6442777617	-	44	53	90.23500061	16.45450063	208.1119949	82.65000153	16.23400011	219.426001	0.2066895369	0.2268413579	0.572618815	1035	0.1721672343	0.3395916339
1	5441071	5443911	AT1G15800	0.1614683622	-	33	46	88.80999756	26.49599953	165.4460052	80.57999802	17.82124972	170.3950043	0.1574440053	0.6894958202	0.8975301582	690	0.2479589603	0.3942565549
1	5444219	5446564	AT1G15810	0.2590405886	+	87	75	80.45999908	15.09299974	156.7314964	85.16999817	15.89300056	239.2065002	0.1227586207	0.550756221	0.8203772979	3047.5	0.2356085076	0.3872945417
1	5446461	5447880	AT1G15820	16.23171112	-	15251	16797	64.38999939	13.7324996	153.5475006	60.25999832	12.52000046	153.6990021	0.04873177569	5.865281798e-17	1.469859844e-14	120394219.5	7.114281058e-21	1.988578369e-18
1	5454765	5457022	AT1G15860	1.706644199	+	104	112	94.48500061	20.37850046	209.7372505	73.75	17.69350066	182.55	0.2032967033	0.01964969443	0.1674140144	4509	0.002090642584	0.02949622024
1	5458397	5460359	AT1G15880	0.336240313	-	127	102	65.19000244	17.06000042	157.2740036	66.20999908	18.84449968	216.642997	0.111394164	0.4610623791	0.7628391213	6229	0.3096979274	0.4270834322
1	5460476	5461297	AT1G15885	0.5018922389	+	26	31	58.40999985	26.8012507	154.3499985	53.15999985	16.26999998	128.7475014	0.2456575682	0.3148529459	0.6580942722	352	0.2092297344	0.3679765978
1	5465250	5469180	AT1G15910	1.716409692	+	40	37	77.03499985	20.01875081	187.9777546	46.93999863	5.222000003	175.2489944	0.3364864865	0.01921278435	0.1652413139	505	0.008404333747	0.07302044864
1	5469254	5471149	AT1G15920	0.6545875577	+	71	52	64.12000275	12.5999999	146.6425056	55.36000061	15.60825033	142.9455044	0.1866197183	0.2215197448	0.5672638284	1646	0.1535343311	0.3253092568
1	5471315	5473048	AT1G15930	0.7366906111	+	1323	1520	49.29999924	12.73049955	174.3629997	53.06499863	11.29950018	173.7137493	0.04090036599	0.1833620218	0.5227796023	980492.5	0.1261959006	0.300264923
1	5473358	5478405	AT1G15940	2.788468469	+	17	30	134.1399994	20.52999973	343.6839966	67.76499939	10.37299986	158.1087534	0.5470588235	0.001627539475	0.0307224497	105	0.0004665037974	0.009956876205
1	5478602	5482180	AT1G15950	3.064365486	+	385	459	58.54000092	12.99599991	157.7339996	49.47999954	10.46999979	170.7650009	0.1348442407	0.0008622526036	0.01916336635	78681	0.00304428682	0.03821132031
1	5486272	5489132	AT1G15970	1.32315326	-	27	50	106.6399994	20.61199965	150.0559959	75.15499878	21.28100066	249.8622437	0.3155555556	0.04751675123	0.2672817257	493	0.02633903346	0.1394165518
1	5489144	5491363	AT1G15980	1.010507305	+	432	659	76.91999817	18.84474988	182.5735039	83.23000336	16.34599962	205.3190018	0.07547560839	0.09760963629	0.3874265602	134489.5	0.0614068807	0.2165329964
1	5494532	5495359	AT1G16000	0.09912356396	+	42	43	55.23000145	13.67725008	137.6962435	47.74000168	12.08449998	148.5610004	0.1362126246	0.7959328621	0.9381531773	842	0.2974366863	0.4210878755
1	5495372	5497723	AT1G16010	0.09508556221	-	102	95	100.3500023	25.61449981	204.7397537	95.62999725	13.88400011	198.3254959	0.08988648091	0.8033678317	0.9409248346	4650.5	0.3137762556	0.4294489308
1	5498011	5501358	AT1G16020	3.12149326	+	40	42	111.4150009	35.67175059	213.6492439	56.86000061	15.93350039	160.4587502	0.425	0.0007559737919	0.01727685388	417	4.437809321e-05	0.001460904483
1	5501965	5504535	AT1G16030	0.1472419029	-	32	13	70.16500092	16.06150057	154.9272472	71.79000092	21.6220005	97.41599884	0.21875	0.7124560801	0.9075058386	208	0.4950046908	0.4990180929
1	5504607	5507059	AT1G16040	1.45979361	+	36	39	112.1150017	34.04875064	218.3437557	86.16000366	8.481500435	170.7980064	0.3183760684	0.03469016692	0.2286019811	491	0.01279707821	0.09380006649
1	5508310	5511736	AT1G16060	1.181159841	+	34	12	85.86000061	20.95400004	224.3864998	65.79999924	15.1377497	128.1577492	0.4166666667	0.06589313332	0.3194652077	152	0.09881982964	0.2675756751
1	5514261	5516027	AT1G16080	0.9863785751	+	193	323	70.41999817	14.12800026	205.5199982	59.40999985	11.20649967	184.6764954	0.1094659844	0.1031861538	0.3962511879	27661.5	0.016167542	0.1067461801
1	5538665	5540002	AT1G16170	0.7228140012	-	56	87	84.75	22.74249959	167.5475025	78.41000366	13.53200006	155.1429962	0.1816502463	0.1893154242	0.5309086803	2193	0.1579473312	0.3291130358
1	5540049	5542902	AT1G16180	2.041116813	+	359	441	63.84999847	12.79899993	179.0745003	54.40000153	10.38000011	152.1999969	0.1156778403	0.009096685645	0.1032971296	70886.5	0.005467838754	0.05581112099
1	5543118	5546103	AT1G16190	1.811121241	+	45	52	125.2399979	18.61299973	234.8580048	85.90000153	13.82975008	203.9637482	0.3085470085	0.01544823116	0.1461849218	891	0.02197182305	0.1276310538
1	5546098	5547753	AT1G16210	0.4549961685	-	129	183	60.90999985	11.0960001	206.4659973	55.88000107	10.21400003	139.898996	0.105477189	0.3507549685	0.6838038757	10711.5	0.0821152837	0.2472762085
1	5554842	5556844	AT1G16240	0.9095739932	-	228	289	67.90499878	14.97374995	182.4392437	60.40000153	15.86200027	185.9939941	0.1033812906	0.1231476154	0.4338025111	31113	0.1386157762	0.3116550543
1	5556963	5559520	AT1G16250	0.245807584	+	21	30	88.87000275	16.36999989	197.1149979	84.85499954	15.09675004	184.9680035	0.2142857143	0.5677961141	0.8307747653	288	0.3060132674	0.4255352764
1	5559497	5562192	AT1G16260	1.082801287	-	39	35	65.73999786	18.55399914	172.7449974	98.94999695	14.99149981	161.1180023	0.2842490842	0.08264159931	0.3572860339	568	0.1085556233	0.2793159823
1	5562860	5568368	AT1G16270	0.02438243089	+	26	39	117.3850021	26.62874961	251.0137501	113.7699966	20.86099968	303.9544861	0.1282051282	0.9454042909	0.9938467616	489	0.4073623393	0.4693627904
1	5567741	5570679	AT1G16280	0.2191772953	-	20	38	85.20000076	14.60924942	159.1554935	67.38500214	9.940999842	192.9347546	0.2026315789	0.6037021252	0.8516834267	370	0.4382487027	0.480786449
1	5574256	5577622	AT1G16300	0.01525458568	+	20	20	125.6450005	16.94075015	254.218502	113.8950005	26.01875048	289.4437431	0.15	0.9654847409	0.9990819787	196	0.4622863642	0.4876856077
1	5580820	5582154	AT1G16320	0.6850703057	+	298	401	64.93000031	13.79325006	181.9827469	60.20999908	12.89999962	157.3600006	0.08067917455	0.2065045829	0.5509869638	55784	0.06660222322	0.2250786595
1	5587721	5590761	AT1G16340	0.4589515704	-	29	39	103.5899963	19.87999935	242.1259995	89.66999817	11.29299965	187.8560066	0.2210433245	0.3475749185	0.6819307068	486	0.1636345123	0.3333465503
1	5590755	5593098	AT1G16350	0.2133994276	+	113	105	62.58000183	11.91800022	161.2220001	54.81999969	9.931999969	160.6	0.1010535188	0.6117874622	0.8565142326	5387.5	0.1209750247	0.2947815564
1	5602785	5604770	AT1G16390	0.2014389347	+	22	13	57.19000053	12.04599998	172.1637512	42.52000046	11.46899996	214.0179977	0.2482517483	0.6288702721	0.8654581982	134	0.3858372731	0.4613858301
1	5608681	5612064	AT1G16410	4.246943625	+	286	144	67.49000168	17.9312501	153.0087528	46.94999886	13.60899997	148.109248	0.2307206682	5.663127963e-05	0.002270597721	15239	5.389368548e-06	0.0002447952245
1	5614592	5615660	AT1G16430	0.1423446067	+	27	19	95.30000305	13.09399986	207.486499	88.69999695	24.08450036	213.5854965	0.1988304094	0.7205355172	0.9109318729	239	0.3522490561	0.4469733354
1	5619544	5622674	AT1G16460	0.4883503099	-	143	173	85.55000305	14.39199991	262.8034958	76.23000336	14.47300005	229.4719971	0.1060269211	0.3248251817	0.6635747036	11117	0.06072389267	0.2156410859
1	5622745	5625683	AT1G16470	0.1688835196	+	214	219	77.48999786	13.58624976	201.3232525	82.91999817	10.05849977	202.6674957	0.06834378867	0.6778232795	0.8900993467	23358.5	0.4773366102	0.4934979465
1	5629182	5631131	AT1G16489	1.17808115	+	15	22	80.87999725	25.61150007	183.6434998	102.5149994	33.39299984	207.5467445	0.4151515152	0.06636190579	0.3210843359	102	0.02659342738	0.1400490822
1	5638778	5640202	AT1G16500	0.3878256941	+	36	32	62.09000015	18.85375059	191.2525043	76.50999832	12.78300006	255.5094929	0.2083333333	0.4094249511	0.7262986573	533	0.300768933	0.4224170271
1	5644571	5645443	AT1G16510	0.7508262132	-	42	27	73.59999847	22.50349998	147.6250065	57.11999893	16.00599957	130.4515038	0.2619047619	0.1774899581	0.5128105956	456.5	0.08810849539	0.2557733134
1	5647461	5648114	AT1G16515	0.04689165864	-	15	26	58.66999817	10.5019999	117.7000011	52.5	20.08124995	132.534996	0.1769230769	0.8976526997	0.9779102889	194	0.4946011596	0.4989692077
1	5648635	5651167	AT1G16520	1.467320068	+	28	24	75.65999985	23.51049993	195.3142483	49.88999939	15.39875031	139.3389977	0.380952381	0.03409415509	0.2270180023	205	0.008301056426	0.07259678409
1	5665657	5668200	AT1G16550	1.263571606	+	17	14	82.51999664	27.88799934	131.6860016	54.54500008	15.13025045	86.68649788	0.4579831933	0.05450400231	0.2891672147	60	0.01011347319	0.08193942746
1	5668383	5670708	AT1G16560	2.754333109	+	87	111	86.54000092	21.81299982	196.4079987	62.38999939	18.07250071	201.2824974	0.2634358496	0.001760625108	0.03218954207	3608	0.001149488665	0.01923693397
1	5670576	5673600	AT1G16570	0.6066984836	-	26	49	105.375	30.31250024	230.6824951	78.16999817	18.87799988	258.4559875	0.2394034537	0.2473440778	0.5946319796	479	0.03976714646	0.1732141066
1	5673706	5675143	AT1G16590	0.1819740938	+	12	15	86.82499695	34.58524971	157.922245	107.7099991	18.61000018	193.6870026	0.2666666667	0.6576970686	0.8781359895	75	0.2396193482	0.3894525244
1	5675494	5678873	AT1G16610	2.251406506	-	119	170	87.06999969	15.41300006	220.0114967	62.93000221	11.86450024	179.9280003	0.2016806723	0.005605230728	0.07585849966	7941.5	0.0009424162728	0.01676624299
1	5687870	5691369	AT1G16650	1.199750381	+	22	15	137.1999969	46.83724957	232.5852474	101.4700012	14.12099977	224.1980057	0.4181818182	0.06313201031	0.3129685436	100	0.02300674589	0.130269985
1	5697215	5699870	AT1G16670	0.7172500165	+	26	21	76.47500229	37.41874981	182.6525002	60.81999969	21.03000069	205.034996	0.304029304	0.1917564511	0.5345230466	195	0.04862373302	0.1919462139
1	5702152	5705892	AT1G16680	0.3084335109	+	32	42	111.1650009	18.95675073	224.7114986	83.23999786	21.40899978	230.4972446	0.1889880952	0.491548629	0.7827190318	584	0.1698638879	0.3382080626
1	5705896	5709563	AT1G16690	0.28138504	+	17	16	89.37999725	41.39400177	212.9000031	76.82500076	25.81375003	175.107502	0.2683823529	0.5231364248	0.8018502127	110	0.1791230649	0.3457574698
1	5709623	5712043	AT1G16700	0.2168664131	+	140	202	60.30500031	13.78774981	151.1730019	56.59499931	12.7042496	158.1165054	0.08260254597	0.6069229875	0.8534854512	13256.5	0.1630202893	0.3328967726
1	5713793	5722614	AT1G16710	0.4352791546	+	33	26	108.8899994	53.3480011	246.476001	99.10499954	28.89250112	166.5537472	0.2319347319	0.3670462957	0.6957509009	315	0.0415589517	0.1766122009
1	5722890	5726478	AT1G16720	0.608364659	+	306	536	82.98500061	16.44749987	205.191246	82.83499908	14.12249982	205.3487549	0.07261486684	0.2463969576	0.5938928299	79843.5	0.2618944156	0.4023215232
1	5726367	5727406	AT1G16730	1.145709556	-	55	76	49.31000137	16.57699986	135.4984962	63.56000137	11.93499994	157.8862534	0.2229665072	0.07149743216	0.3329750645	1817	0.1018973965	0.2715084617
1	5727621	5729115	AT1G16740	0.08993045313	+	66	105	65.29499817	12.99749982	163.84375	67.45999908	10.27600002	203.873999	0.09783549784	0.8129606913	0.9445550478	3378	0.3918661493	0.4634362626
1	5729056	5731934	AT1G16750	0.03486367521	-	30	16	109.9250031	16.87750065	189.9220039	100.7150002	29.18749952	168.3350029	0.1625	0.9228610672	0.9872514619	231.5	0.426805934	0.4763205858
1	5739467	5744636	AT1G16780	0.8382234757	-	19	22	144.5399933	33.24599981	241.2610008	86.64500046	11.02574981	250.6832497	0.3421052632	0.1451364594	0.4672614128	143	0.04340643661	0.1811405559
1	5744334	5745259	AT1G16790	0.09032263804	+	55	47	48.33000183	11.02449994	129.3705051	58.16999817	12.80149999	157.8209961	0.1230174081	0.8122268874	0.9441233555	1283	0.4759103697	0.4931910046
1	5755587	5756895	AT1G16810	0.08722709838	+	193	279	58.88000107	13.7840004	163.0200012	55.79000092	10.6625001	170.1274956	0.058536223	0.8180369139	0.9470463196	25754	0.2111591448	0.3692739691
1	5758854	5760509	AT1G16825	2.393369255	+	24	28	121.3400002	25.78575039	197.4722507	76.57999802	17.06499987	148.8275019	0.4702380952	0.004042320504	0.05999574559	190	0.003784251477	0.0439329834
1	5762693	5764184	AT1G16840	1.154818238	-	134	139	79.55500031	19.60624924	175.7202538	83.76999664	18.45200071	198.1349998	0.1542467519	0.07001349567	0.3298939087	9140	0.3956928226	0.4647245924
1	5767299	5770602	AT1G16860	0.1357402956	+	53	99	72.95999908	12.35900021	158.7070053	67.75	13.26700015	161.8365021	0.1143510577	0.7315764292	0.9154854197	2423.5	0.2202596643	0.375936381
1	5770731	5773322	AT1G16870	0.8440145752	-	51	84	93	13.01499987	212.6949997	71.375	11.60575013	217.4462524	0.1988795518	0.1432139835	0.4656857383	1831	0.07939450943	0.2436653705
1	5773511	5776308	AT1G16880	8.10988292	+	748	944	104.2999992	33.74825058	235.7924953	86.99499893	24.88275056	238.368998	0.1513980785	7.764564113e-09	7.097983609e-07	294258	1.920080599e-09	1.66121259e-07
1	5776176	5778529	AT1G16890	0.3841924615	-	307	369	58.97000122	14.82700024	191.5019943	69.15000153	13.01800003	211.6980011	0.06774185006	0.4128644969	0.7298163273	54380	0.1855634456	0.3505998547
1	5779007	5782433	AT1G16900	0.5202013437	-	41	42	100.5199966	17.80999947	320.519989	66.79500198	17.90424962	240.5837517	0.2067363531	0.3018551962	0.6489373283	784	0.2429701592	0.3911417866
1	5786556	5787329	AT1G16916	0.007720074347	-	31	48	60.45999908	19.47999954	125.1324997	61.29000092	20.07875013	127.0257517	0.1034946237	0.9823809352	0.9999976789	741	0.4899873592	0.4979699529
1	5787149	5789312	AT1G16920	0.9609892657	-	102	177	50.71500015	12.21074994	140.2479984	58.56000137	9.480000114	138.5080017	0.1473911599	0.1093983405	0.4079615281	8324.5	0.1397176423	0.3125744082
1	5789678	5791752	AT1G16930	3.713761707	+	15	12	130.6699982	70.53800087	301.0040009	59.16499901	18.39900043	140.7874966	0.7833333333	0.0001933028661	0.006202333685	18	0.0002425582109	0.005884337499
1	5799740	5800887	AT1G16960	0.2956640921	+	42	45	141.8450012	14.09349976	296.9125084	118.2600021	20.02900066	326.4829865	0.1714285714	0.5062160468	0.7906092202	861	0.2390818807	0.3891003399
1	5800766	5805811	AT1G16970	0.0873046763	-	13	22	120.5299988	27.61200027	169.0400055	114.3250008	19.32174935	205.7962471	0.2097902098	0.8178908012	0.9470463196	141	0.4795794281	0.4940245916
1	5828914	5831383	AT1G17050	0.1865217091	+	92	184	73.35499954	19.04474936	170.9189949	76.58499908	12.28799956	177.0080032	0.09239130435	0.6508460762	0.8746345892	8264.5	0.3751107014	0.457402185
1	5837589	5840332	AT1G17070	0.007129564606	+	18	29	60.6099987	17.92425056	114.9317478	67.63999939	25.50600071	120.2289978	0.132183908	0.983717586	0.9999976789	250.5	0.4133832996	0.4712200032
1	5840268	5841745	AT1G17080	1.625448389	-	188	196	67.49499893	12.18799982	177.9660007	50.86000061	11.30249977	161.260006	0.1500217108	0.02368926634	0.1860202519	15789	0.007696675895	0.06917556559
1	5844645	5845661	AT1G17100	0.02410397767	+	175	200	55.16999817	15.87450027	163.7244972	57.23999977	15.10624962	177.9182495	0.05357142857	0.9460106428	0.9940189903	17040.5	0.3305829077	0.4372346048
1	5845674	5850934	AT1G17110	1.492013975	-	62	60	110.545002	29.64175043	235.2612442	99.09500122	25.98799977	216.9249969	0.2537634409	0.03220965144	0.2192218525	1566	0.06641250656	0.2247017885
1	5851859	5853987	AT1G17120	1.088166654	+	63	91	71.37999725	17.27750092	176.4590019	61.11999893	15.05000043	201.1299973	0.2026862027	0.08162690795	0.3556496124	2368.5	0.03375853995	0.1586450166
1	5854092	5856697	AT1G17130	0.5933185487	+	88	78	82.68500137	13.73374968	162.5417568	72.70499802	16.74000058	183.998	0.1544289044	0.255082962	0.6028625023	3039.5	0.102341043	0.2719427898
1	5856572	5858550	AT1G17140	0.1127459032	-	60	48	71.6649971	20.29725037	206.9689987	79.34499741	23.19199924	181.356255	0.125	0.7713546409	0.9304343231	1392	0.3845008568	0.460697383
1	5860077	5862890	AT1G17145	0.3155505833	-	46	47	111.2849998	18.64374995	292.1925125	102.8099976	10.9525001	301.4549896	0.1688251619	0.4835589398	0.7779709719	967	0.1915613439	0.3546935203
1	5863108	5864059	AT1G17147	0.01947562293	-	19	13	48.90000153	12.99349966	135.9649982	41.08000183	10.29900026	115.2189995	0.1740890688	0.9561463623	0.9971892948	115.5	0.3867510719	0.4618424007
1	5867534	5869436	AT1G17160	1.630883311	+	52	69	77.91500092	19.41800013	144.6182537	47.72999954	10.06099997	173.8940002	0.2670011148	0.02339465735	0.1847873518	1327	0.007292786839	0.06696521999
1	5869542	5870883	AT1G17170	0.06414433225	+	183	14	55.81999969	16.61750021	149.2189987	65.77499771	19.06525064	147.6787495	0.1600312256	0.8626917955	0.9645557883	1245	0.4314585494	0.4780706179
1	5875294	5876620	AT1G17190	1.071201645	+	38	39	55.53999901	11.02874975	125.3202517	33.63000107	8.138000298	113.4184971	0.2773279352	0.08487862871	0.3624016927	611	0.09351136211	0.2619722729
1	5878389	5880073	AT1G17200	0.9679390811	+	291	383	55.74000168	12.16749978	189.9899979	48.75999832	11.09100018	153.4615059	0.09306164931	0.1076616221	0.4051208863	50732.5	0.02305774801	0.1304571302
1	5879995	5884773	AT1G17210	1.890403783	-	112	128	68.79500198	12.42749996	139.1772541	86.79000092	13.10700006	213.4622429	0.2020089286	0.01287052365	0.1301830628	6012.5	0.01567757309	0.105010841
1	5885006	5890500	AT1G17220	4.074313752	+	456	560	95.91999817	17.05624986	194.1224995	79.33000183	16.1097506	201.8577435	0.1404448622	8.42725719e-05	0.00314077393	107686	8.626476138e-06	0.0003677003832
1	5909084	5911708	AT1G17270	0.4708944387	-	18	14	94.56000137	37.12025042	200.4032482	85.04000092	12.86124995	166.1654999	0.3174603175	0.3381470175	0.6754111446	122	0.4471148777	0.4837947404
1	5916831	5920393	AT1G17280	0.7733895099	-	127	168	82.5	14.18400025	196.3270012	72.62000275	14.73624983	249.7942463	0.1287495313	0.1685041068	0.5005978886	9596	0.06983777375	0.2302840385
1	5922331	5926400	AT1G17290	3.158377419	+	376	394	74.58000183	14.91000009	165.8137474	61.43999863	10.5172497	185.3819992	0.1425639918	0.0006944205771	0.01614944494	62711.5	0.0001156440772	0.003159561394
1	5929825	5931926	AT1G17330	0.1323030149	+	34	41	90.47000122	4.732750046	245.7505035	105.1600037	10.46000004	218.9199982	0.1535150646	0.7373895609	0.9175547699	624	0.22017662	0.3758387752
1	5933779	5938817	AT1G17340	1.324433807	+	15	32	149.6399994	26.43049989	240.6404976	122.2900009	24.52875028	220.4350025	0.4083333333	0.04737685126	0.2670626046	177	0.07688210752	0.240680903
1	5941548	5944465	AT1G17350	0.2358943675	+	24	20	86.29499817	15.28075058	151.6972477	100.4850006	14.74950027	206.6032486	0.225	0.5809056928	0.8392502982	205	0.2080594964	0.3674425335
1	5946447	5951561	AT1G17360	0.2100330629	+	48	64	81.875	16.2994998	194.7219948	83.54000092	15.44975002	162.024752	0.140625	0.6165480622	0.8593715079	1450	0.3075884086	0.426277414
1	5951541	5955143	AT1G17370	1.820891305	-	144	240	85.61500168	15.37800002	225.2257511	61.21000099	10.32825036	212.2642433	0.1625	0.01510458143	0.1440899758	13631.5	0.0002657056073	0.006352522123
1	5968409	5969995	AT1G17410	0.0002463603944	-	24	22	126.7700005	21.70875092	197.8957497	128.8399963	23.61975036	274.7192539	0.1022727273	0.9994328951	0.9999976789	253	0.4086982902	0.4695994044
1	5977322	5981521	AT1G17420	0.1552625633	+	20	19	67.90499878	15.6184999	161.0342445	59.47999954	15.35250001	164.3969971	0.2157894737	0.6994190174	0.9018660677	161.5	0.2157077031	0.3728075464
1	5982144	5984013	AT1G17430	0.9150631051	+	23	18	119.2600021	13.76100054	166.9519997	60.71000099	16.42325053	157.9350056	0.3550724638	0.1216009296	0.4310901247	151	0.07241968557	0.2341236943
1	5983983	5987934	AT1G17440	0.4438491882	-	35	78	100.1800003	21.83550038	179.9959969	80.09000015	15.37549987	203.9355007	0.1827838828	0.3598742824	0.6895648521	1220	0.1847865632	0.3500328263
1	5988279	5997033	AT1G17450	0.152616141	-	11	14	87.59999847	30.38999987	174.1300011	104.3699989	17.15849969	352.5592545	0.2662337662	0.7036940177	0.9035856272	68	0.3208470164	0.4330107393
1	5997056	5998599	AT1G17455	1.514829942	+	26	29	80.75	28.89749908	137.8999977	62.34999847	7.785000134	205.1760025	0.375331565	0.03056117571	0.212946639	310	0.1311248121	0.304943863
1	6002887	6006410	AT1G17470	1.015996049	+	202	257	70.44499969	20.89924941	200.4254959	60.79999924	12.57400036	205.3280029	0.1143814771	0.09638377918	0.3844256657	22930.5	0.01597421302	0.1059722438
1	6008436	6009420	AT1G17490	0.433665522	+	55	50	61.72999954	13.21349959	133.7465065	50.88000107	10.92300005	130.9372482	0.1745454545	0.3684126025	0.6967294916	1204	0.1369894183	0.3104367315
1	6017807	6023503	AT1G17500	0.8434680589	+	22	30	95.25999832	26.1242496	189.2092514	94.57499695	14.06050037	205.8214977	0.3090909091	0.1433943175	0.4656917125	275	0.156383663	0.3276685226
1	6023503	6024309	AT1G17510	0.8231311156	-	46	41	58.21999931	15.03625023	160.887495	42.79000092	11.96000004	108.7399979	0.237009544	0.1502688229	0.4745029916	707.5	0.02284516499	0.1297200711
1	6024635	6027565	AT1G17520	0.640301049	-	33	28	105.0699997	27.89399986	191.8759949	75.94499969	15.83675008	190.2027477	0.2575757576	0.2289280194	0.5755275742	378	0.1134282395	0.2850840447
1	6027486	6029115	AT1G17530	0.3161789225	+	152	102	51.77000046	10.90300033	128.2079987	47.875	11.56474984	134.5299927	0.1055211558	0.4828598304	0.7771418043	7271	0.2012600867	0.3620887931
1	6034269	6037398	AT1G17550	1.012632489	+	89	101	94.22000122	18.05599976	179.8699951	78.23999786	11.07000017	220.4300003	0.1753253977	0.0971331585	0.3861680686	4032	0.1109656705	0.2823001529
1	6037404	6038698	AT1G17560	0.3743601412	-	25	17	99.19999695	35.22199936	173.2660004	89.23000336	16.82400017	211.6840027	0.2635294118	0.4223182591	0.7368111393	191	0.2952462084	0.4201903103
1	6039249	6049685	AT1G17580	1.095642234	+	52	37	139.3050003	27.23750019	285.263739	115.2699966	21.73799987	234.9089951	0.2645530146	0.08023387469	0.3524325683	759	0.04592246951	0.1862916814
1	6061894	6063362	AT1G17620	0.5308064863	+	72	127	52.52999878	13.86399992	135.9897484	48.27000046	9.613999701	146.7545021	0.1414041995	0.2945733907	0.641657811	4300	0.2433807638	0.3914467303
1	6069423	6072140	AT1G17650	2.970498413	-	55	83	95.66999817	25.39200029	251.6199944	70.36000061	15.025	202.4340057	0.3294633078	0.001070290293	0.02251326977	1480	0.000243603998	0.005891487706
1	6076070	6082395	AT1G17680	0.04167012437	+	43	34	81.65000153	19.60200052	235.564505	86.30999756	21.24399931	253.2390049	0.1251709986	0.9085103424	0.9813389454	700	0.3771881957	0.4580404393
1	6082721	6088381	AT1G17690	0.1696519994	-	28	31	110.5250015	39.53500071	289.0797539	134.6300049	30.47750139	389.3974915	0.180875576	0.6766249385	0.8895390269	363	0.1422761219	0.3157708705
1	6089459	6090339	AT1G17700	0.04849758453	+	20	24	41.93000031	10.95974972	116.6882484	43.46500015	12.22550001	110.4012491	0.1666666667	0.8943395061	0.9768608201	234	0.4484271136	0.4841822953
1	6093184	6098443	AT1G17720	0.6556105816	-	42	69	99.72499847	35.14449825	168.8165005	89.97000122	14.90199986	231.4170029	0.1997929607	0.220998547	0.5665835973	1247	0.1102491741	0.2812441689
1	6099038	6100397	AT1G17730	1.929798723	+	63	123	93.04000092	16.26350021	229.049498	62.13999939	11.17599983	191.4014961	0.2431281456	0.01175442197	0.123203144	2891	0.002336198037	0.031748951
1	6100963	6105347	AT1G17745	0.189975249	+	180	14	52.81000137	11.31799994	136.5565002	48.1950016	11.3734997	139.1267494	0.1968253968	0.6456910267	0.8733593033	1080	0.1875316228	0.3513820189
1	6110106	6116617	AT1G17760	0.2538346752	-	38	40	144.1650009	33.40300164	254.5094982	116.4049988	11.96975026	203.9070042	0.1736842105	0.5573978957	0.8235188467	642	0.1200756847	0.2936732421
1	6123566	6125339	AT1G17780	0.886449806	+	72	64	87.46500015	19.13050003	169.780999	80.98500061	12.76950033	243.8819996	0.1961805556	0.1298823668	0.4441976944	2212.5	0.3457762228	0.4439572509
1	6125277	6127567	AT1G17790	0.4440594469	-	16	21	104.3449974	18.97624922	234.7149906	114.8399963	27.47499943	187.3099976	0.2916666667	0.3597000955	0.6895648521	136	0.1670985463	0.3362074768
1	6131063	6135345	AT1G05333	0.9386682612	-	19	14	104.6800003	31.68600054	147.6710007	76.29000092	23.81774983	301.7652538	0.3984962406	0.1151679771	0.4188057412	114	0.2501940472	0.3958608196
1	6131536	6135345	AT1G17820	1.11067289	-	19	15	104.6800003	31.68600054	147.6710007	75.62000275	24.34449987	297.0595039	0.4175438596	0.07750453413	0.3454548922	118	0.2025843868	0.36321254
1	6135750	6138500	AT1G17830	0.2451738258	-	24	13	101.6200027	15.28424981	231.5625038	121.7799988	62.04099998	198.8879929	0.2564102564	0.5686252937	0.831569438	141	0.3222893779	0.4332683802
1	6142401	6146521	AT1G17840	0.5681965544	+	155	297	86.33000183	21.925	174.4994957	77.27999878	20.22000008	196.1079987	0.09779515586	0.2702734875	0.618162886	22026.5	0.2262159261	0.379989424
1	6145925	6148940	AT1G17850	0.3886008611	-	49	47	126.5999985	37.49599915	307.7499939	120.8099976	12.36300001	247.5959976	0.1762917933	0.4086948253	0.7258527963	1012	0.1541580687	0.3255553703
1	6149300	6150038	AT1G17860	0.4485360906	+	171	75	45.36000061	12.06000018	113.3174973	42.63000107	10.62600021	153.7770065	0.1260818713	0.3560114037	0.6871121673	5779.5	0.1091528921	0.2801087219
1	6149938	6152222	AT1G17870	0.7853313457	-	27	41	132.1100006	41.18300056	272.2320061	120.7399979	18.36000061	248.5800018	0.2673893406	0.163933856	0.4944063524	439	0.07651871971	0.2400187242
1	6152383	6153982	AT1G17880	6.74368478	-	677	1073	64.48000336	12.7550004	163.552005	48.31000137	11.39000034	164.1539948	0.1389263251	1.804326884e-07	1.304770709e-05	309569.5	9.436847491e-08	6.379747827e-06
1	6154263	6155804	AT1G17890	0.4485347495	-	80	75	76.55999756	15.32899959	163.1035042	57.16999817	15.57349992	154.894001	0.1458333333	0.356012503	0.6871121673	2860	0.308717071	0.4267033422
1	6166219	6168845	AT1G17930	0.4002676398	-	14	15	104.454998	28.53100014	129.8699972	81.95999908	13.78250017	206.7100021	0.3142857143	0.3978619072	0.7192358165	81.5	0.1577071564	0.3288771188
1	6169284	6173273	AT1G17940	0.2344264116	-	22	30	89.28000259	21.84100037	159.5037491	83.47000122	20.35625052	192.5907501	0.2090909091	0.5828725304	0.8402313031	306	0.3316869214	0.4378411955
1	6184716	6187499	AT1G17970	0.165140189	+	23	31	119.3799973	36.30999908	145.9719986	93.62999725	30.49999952	185.1475029	0.1893408135	0.6836909181	0.8936553503	304	0.1815071332	0.3473151898
1	6187464	6191708	AT1G17980	0.9088376228	-	69	71	83	15.03199987	248.6979996	69.44000244	12.98250031	196.3300018	0.1949377424	0.1233565962	0.4338224353	2041.5	0.04471044691	0.1832783794
1	6192032	6194093	AT1G17990	0.2356357293	-	112	115	101.7999992	36.55125084	277.8912476	108.6399994	34.15000038	292.2125076	0.1013975155	0.5812517463	0.8394767619	6400.5	0.4685811444	0.4904462399
1	6194425	6196343	AT1G18000	0.1574688421	-	93	88	72.04000092	20.10299988	194.9429977	80.16500092	15.26374981	163.34375	0.103372434	0.6958748776	0.9001432632	3983.5	0.3795942444	0.4588943246
1	6199689	6201759	AT1G18010	0.2004100355	+	93	89	72.04000092	20.10299988	194.9429977	80.18000031	15.30999985	163	0.1087350489	0.6303619125	0.8664421007	3993.5	0.3421062857	0.4427375771
1	6202234	6204234	AT1G18020	0.2302591317	+	113	116	101.8099976	36.59000092	277.4099976	108.7399979	34.18500042	291.9337578	0.1003967043	0.5884924132	0.8430857546	6491.5	0.4507785949	0.4848677523
1	6204258	6206988	AT1G18030	0.15722119	+	22	20	113.9650002	36.81049967	159.5140026	114.7700005	25.29525089	243.2197414	0.2090909091	0.6962718065	0.9001432632	187	0.2065387033	0.3662364343
1	6206870	6209528	AT1G18040	0.397295967	-	18	14	96.86500168	24.84150052	158.4294971	48.94499969	20.09899969	154.2550018	0.3015873016	0.4005936243	0.720622318	91	0.09500549032	0.2633693318
1	6211831	6213591	AT1G18060	0.4403897784	-	365	373	65.16999817	16.84900017	156.3640015	63.04000092	19.54499989	180.1210022	0.06726651732	0.3627523392	0.6918478748	66244.5	0.2639748067	0.403022775
1	6213650	6218384	AT1G18070	0.8955686943	-	202	272	85.85499954	13.52074955	203.1497536	76.13000107	12.24799976	220.4602524	0.107709668	0.1271836562	0.4394139394	25610	0.1034286872	0.2737796525
1	6222200	6224242	AT1G18080	12.21601588	+	905	1632	65.87000275	14.24799976	152.176001	50.56500053	11.42424965	151.9222469	0.156524889	6.081127614e-13	1.027781278e-10	615518	1.736469104e-12	2.273835894e-10
1	6224404	6227822	AT1G18090	0.2014784581	+	14	16	98.12999725	18.34450054	173.9252525	131.9249954	34.83624983	177.4800053	0.2589285714	0.6288130437	0.8654581982	85	0.1353135492	0.308660144
1	6244297	6247830	AT1G18150	0.9255240216	-	60	89	100.5999985	17.6062499	207.4045002	85.23999786	15.26599998	228.3359985	0.1940074906	0.118706904	0.4258156096	2327	0.09247436243	0.2613484071
1	6248618	6254080	AT1G18160	0.2682142101	+	49	58	114.5599976	21.29999924	220.8320038	120.6000023	14.66749969	287.5079895	0.151653765	0.5392445815	0.8128092909	1341	0.309563273	0.4269787601
1	6254093	6255734	AT1G18170	0.1950216499	+	86	132	72.46500015	12.2387501	255.3474941	64.97000122	12.89499989	164.6699951	0.1011275546	0.638231669	0.8695816751	5433	0.2970945521	0.4210487101
1	6257850	6261501	AT1G18190	0.5071445589	-	22	41	118.7700005	15.99899976	195.562743	105.7900009	25.20000076	247.8899994	0.2450110865	0.3110680746	0.6555616624	390	0.1915295607	0.3546935203
1	6266608	6268939	AT1G18210	0.1935806877	-	213	157	55	11.31599998	136.6050049	49.93000031	11.15799961	155.3579987	0.07700128585	0.6403527991	0.8701877277	16560	0.4374819979	0.4805260213
1	6276776	6278258	AT1G18250	0.09989530733	-	53	35	63	15.71500015	142.7110031	55.08000183	16.16999993	157.5454941	0.1369272237	0.7945197416	0.9381531773	912	0.4491203141	0.4844140521
1	6278787	6282144	AT1G18260	0.03266058245	-	75	70	70.75	13.16650043	225.3344978	67.70499802	13.09499986	251.2834999	0.08857142857	0.927554459	0.9884217793	2548.5	0.3818176385	0.4598107799
1	6283369	6293993	AT1G18270	0.9776932891	-	50	47	138.0599976	17.33700001	248.9240059	94.31999969	19.00400057	307.4729889	0.2395744681	0.1052705061	0.4009419518	967	0.06708841727	0.2260909216
1	6299668	6301139	AT1G18300	1.017852092	+	25	17	88.30000305	20.23799973	221.0699951	63.15000153	13.95999966	113.5240005	0.3694117647	0.09597274314	0.3834425018	138	0.0289640581	0.1458022242
1	6304359	6305689	AT1G18320	0.5515838314	+	28	21	111.079998	37.94200101	174.1215065	130.5500031	24.85999966	179.7600021	0.2738095238	0.2808123271	0.6291157715	264	0.2755909532	0.4086092421
1	6305813	6308243	AT1G18330	0.07068179114	-	99	139	79.61000061	12.72649984	165.9875053	81.02999878	14.82949948	227.7854996	0.07891868324	0.8498029001	0.959817014	6770	0.4167884515	0.4726142064
1	6311442	6313931	AT1G18340	1.138702193	-	20	43	116.7999992	31.29150095	329.2742485	83.56999969	12.85750036	198.9279991	0.3348837209	0.07266040373	0.3353823335	272	0.01002038588	0.08150633329
1	6316694	6319427	AT1G18360	0.1379776416	-	41	68	92.23000336	17.88999939	204.1900024	89.66500092	15.66100001	241.6662567	0.1327116212	0.7278172732	0.9144903238	1376.5	0.4576560869	0.4867713254
1	6325535	6330179	AT1G18390	0.2109098129	+	18	19	96.29999924	15.5477499	183.2522495	111.4000015	19.56549978	202.5969994	0.2368421053	0.6153046358	0.8585582841	135	0.1403532964	0.3131770285
1	6331397	6333856	AT1G18400	0.5050587558	+	89	82	93.44000244	15.84800034	222.6059998	71.72000122	11.87124991	196.8050064	0.1442861058	0.3125656468	0.6564241433	3274	0.1234495738	0.2971282128
1	6342939	6345787	AT1G18415	0.0553646288	-	11	17	93.70999908	64.39749908	271.1775093	97.63999939	59.82599945	177.1399933	0.2139037433	0.8803094646	0.9723897726	87	0.3888788706	0.4625301896
1	6345973	6347918	AT1G18440	0.1242189595	+	38	50	106.3500023	26.99099951	281.4714996	95.375	18.12450051	245.2937561	0.1410526316	0.7512440416	0.9221630052	883	0.2876726747	0.4162676903
1	6348047	6352010	AT1G18450	0.07315161313	+	91	117	79.55000305	13.13750005	226.1625023	69.44999695	12.82800035	206.3969955	0.08424908425	0.844983808	0.9583956028	5168.5	0.3598784778	0.4503128164
1	6352324	6356113	AT1G18460	2.340006018	+	96	142	106.3050003	31.72624874	212.6212482	87.5	13.61175027	208.9887482	0.226379108	0.004570818555	0.06558425241	5574.5	0.008616887783	0.07428615891
1	6355694	6360344	AT1G18470	0.3578424545	-	54	75	91.1099968	15.65274999	210.3132439	94.54000092	14.69400001	226.3120003	0.1511111111	0.4386898089	0.7466020744	1941	0.3450802442	0.443756319
1	6361585	6363061	AT1G18480	0.06920648332	+	58	61	65.60000229	20.25249982	135.0379974	61.13999939	11.80999994	124.0099983	0.1088185415	0.8526946079	0.9616632624	1751	0.462936791	0.4880281335
1	6363041	6366263	AT1G18485	0.5747884706	+	26	17	75.29000092	26.35874999	164.9212513	47.40999985	16.28799973	146.1080048	0.2986425339	0.266202132	0.6148526828	183	0.1757966281	0.342739282
1	6366519	6368879	AT1G18490	1.143118639	+	32	44	100.2999992	19.15825019	237.3134991	78.58000183	17.06100063	259.8867416	0.2897727273	0.07192524688	0.3341539703	542	0.04465108569	0.1832783794
1	6368965	6373080	AT1G18500	0.2805820155	+	89	164	87	18.79400063	196.0540039	80.03499985	11.05725	193.4134956	0.1050972869	0.5241046158	0.8028315926	6576	0.09713405383	0.266140357
1	6376638	6378580	AT1G18540	4.017781122	-	925	1153	60.66999817	12.80299997	158.498999	51.70999908	11.63199997	156.652002	0.09788706313	9.598842778e-05	0.003487979494	474406.5	7.463217186e-06	0.0003257593447
1	6389398	6391386	AT1G18570	0.0368013212	+	67	21	82.93000031	24.27350073	153.1384941	86.80999756	34.58999825	239.1799927	0.1336176262	0.9187528066	0.9847834066	664.5	0.353128157	0.4470407505
1	6395768	6398274	AT1G18580	0.6633244036	+	42	35	85.11000061	27.00875001	131.0047523	67.04000092	16.29799995	175.3344955	0.2333333333	0.2171078849	0.5630085828	604	0.09093118093	0.2595235208
1	6398530	6400029	AT1G18590	0.06974015038	+	116	60	57.09999847	15.97124958	168.9687519	57.06999969	11.12550008	132.8362549	0.09482758621	0.8516474485	0.9608550542	3255	0.2417530262	0.3905576017
1	6400281	6402794	AT1G18600	0.1069246221	+	50	69	72.70000076	27.30000038	177.3775028	76.68000031	17.3989994	215.361998	0.1188405797	0.7817634788	0.9348797543	1717	0.4838956285	0.4955557642
1	6405606	6409532	AT1G18610	0.3006783125	+	27	30	107.6999969	38.27699928	238.8274925	129.3699989	31.99775085	258.3644913	0.2111111111	0.5004050542	0.7881013612	349	0.1875375369	0.3513820189
1	6409654	6414569	AT1G18620	2.201822033	+	101	131	102.5599976	19.36999989	223.1650009	80.08000183	16.43749952	178.1224937	0.2208449853	0.006283157803	0.08161367174	4991	0.0006774896292	0.01312974901
1	6414608	6416459	AT1G18630	0.661121797	+	44	58	61.92000008	11.93449986	191.1889965	77.75	15.50049951	190.6862541	0.2045454545	0.2182117856	0.5642605058	1116	0.1405868866	0.3136019639
1	6416168	6418693	AT1G18640	0.0572519438	-	79	90	80.48000336	12.21350045	217.2904961	81.2100029	13.71450019	204.4507481	0.08917018284	0.8764922012	0.9713764666	3476	0.4023208463	0.4673963667
1	6418837	6421188	AT1G18650	2.027218708	-	138	228	88.52999878	13.24625003	231.7094975	62.31500053	14.30175011	219.3539997	0.1741037376	0.009392501911	0.1054208612	13545.5	0.01292558572	0.09438992451
1	6420855	6425898	AT1G18660	0.6246288565	+	67	70	131.5800018	16.3365005	289.1179947	98.65999985	12.0752501	241.6307472	0.1722814499	0.2373401123	0.5852247588	2099	0.14523293	0.3182810416
1	6426708	6431093	AT1G18670	2.162035779	-	32	28	115.7350006	18.11050005	179.8172508	80.27000046	11.42899995	197.0577503	0.4196428571	0.00688595564	0.08613370501	335.5	0.04850042404	0.1917263094
1	6431937	6433552	AT1G18680	1.181528584	-	25	30	62.79000092	13.5420002	151.2720016	39.48999977	12.17824974	133.9935032	0.34	0.06583720969	0.3193005815	263	0.02973558226	0.1481174394
1	6433516	6437236	AT1G18690	0.166548522	+	19	15	103.7300034	24.62200079	224.920005	103.3000031	46.54249954	222.2584984	0.2350877193	0.6814774317	0.892228331	140	0.4723480325	0.4915923423
1	6437473	6444076	AT1G18700	0.2984679673	+	47	57	122.7600021	40.68899937	222.9949966	108.4599991	29.6779995	263.7080078	0.1582680105	0.5029583617	0.7895156872	1142	0.0991001897	0.2681350069
1	6450584	6453263	AT1G18710	0.08273198155	+	60	62	82.00499725	18.16550007	171.0735027	80.98500061	15.33750048	157.3664936	0.1107526882	0.8265478841	0.9505398762	1843.5	0.4673478628	0.4898540392
1	6457774	6460405	AT1G18720	1.294832459	-	177	210	68.90000153	12.03800011	182.7980011	58.14499855	12.60575008	177.1697525	0.1364810331	0.05071863317	0.2776630257	16216.5	0.0153850457	0.1039134011
1	6460402	6462344	AT1G18730	0.6133267467	+	322	431	65.77500153	13.7107496	192.3790047	71.41000366	13.01750016	199.7974968	0.0748367944	0.2435977392	0.5909605103	66151.5	0.136352283	0.309717211
1	6463921	6465476	AT1G18740	0.2911302046	+	47	62	72.5	17.89200001	171.0825035	66.32500076	14.80974965	153.4205017	0.1544269046	0.5115284527	0.7945144326	1272	0.1294752721	0.3031227569
1	6465486	6466454	AT1G18745	0.04664417744	-	33	35	117.9599991	14.71199989	221.3059937	113.5800018	14.90649991	250.2749954	0.1341991342	0.8981643697	0.9780355944	548	0.3609745753	0.4507895171
1	6474801	6475979	AT1G18773	0.438107461	+	28	18	122.4249992	26.49649954	267.4962524	138.5699997	44.93300004	334.3310028	0.2658730159	0.3646637041	0.6929516196	197	0.1099758812	0.2807833187
1	6481112	6483646	AT1G18800	0.8584967896	-	109	135	62.45000076	16.41199999	178.870993	48	13.09399991	191.8140022	0.1462453279	0.1385170425	0.4584160255	6368	0.03558720787	0.1632523783
1	6485514	6487153	AT1G18810	0.1575619417	-	30	64	66.52499771	16.90600011	127.1949995	61.51000023	13.06399994	167.5502514	0.1520833333	0.695725719	0.9001432632	913	0.3530255672	0.4470407505
1	6500802	6504567	AT1G18840	0.962891764	-	43	84	82.37999725	14.32949977	196.4214981	53.36999893	16.26824956	168.3057568	0.2203765227	0.1089201513	0.4073182716	1472	0.04465434863	0.1832783794
1	6504676	6506542	AT1G18850	0.1148716876	-	70	60	69.06000137	9.060749984	141.617997	62.98999977	10.11025	153.5917484	0.1142857143	0.7675882399	0.9291889778	1912.5	0.1912448213	0.3545667254
1	6520720	6523368	AT1G18880	0.1970840821	+	33	22	81.87999725	14.86400032	127.023999	78.83000183	13.95225019	187.4812557	0.196969697	0.6352079398	0.8682449275	326	0.2653042434	0.4034101033
1	6522763	6526075	AT1G18890	0.08637759628	-	54	55	82.75500107	14.83799999	194.8762459	94.73000336	13.11100025	197.804998	0.1178451178	0.8196386017	0.9475975361	1451	0.4195556735	0.4736770297
1	6528983	6532697	AT1G18900	1.550882277	+	32	39	70.35499954	28.61625092	139.2164951	55.16999817	11.9349997	185.5975021	0.3365384615	0.02812663148	0.2043540293	449	0.02187039441	0.1273582463
1	6532558	6538145	AT1G18910	0.502188663	-	15	12	111.3700027	47.05200119	183.5750046	141.25	22.1872503	276.630748	0.35	0.314638119	0.6580250326	68	0.1470677558	0.3194822449
1	6546176	6552108	AT1G18950	0.1867211099	+	40	46	83.04000092	23.91200051	208.3294937	65.86999893	12.43124986	195.5449982	0.1543478261	0.650547317	0.8746186345	787	0.1256490089	0.2994239606
1	6560490	6562791	AT1G19000	5.349549019	-	559	655	65.47000122	13.10499988	191.4209984	50.25	9.79399972	164.5179947	0.1458056235	4.471476794e-06	0.00023640561	150675	5.164254144e-08	3.643807475e-06
1	6565493	6567662	AT1G19010	0.170334569	+	19	14	104.2900009	14.95700011	158.9329971	75.33499908	23.24449954	209.1904964	0.2406015038	0.6755623395	0.8890265826	131	0.4782130908	0.4936724815
1	6568001	6568705	AT1G19020	0.4751886786	+	87	20	42.31999969	10.91599989	124.2590019	50.84499931	14.10575025	91.43524952	0.225862069	0.3348199455	0.671017342	836	0.3944649928	0.4645329108
1	6577832	6579314	AT1G19050	0.2903918416	-	26	45	69.55500031	11.77374995	216.2337456	71.38999939	20.67599926	163.1250015	0.1948717949	0.5123988642	0.7947622976	540	0.2976683216	0.4210878755
1	6584240	6586517	AT1G19080	0.09353515861	+	29	40	140.7400055	35.0039999	337.5329956	137.7600021	24.33450007	233.8902534	0.150862069	0.8062409289	0.9422545079	497	0.1579495834	0.3291130358
1	6594882	6601355	AT1G19100	2.012894106	+	34	20	115.5849991	34.6079988	218.5359962	87.93499756	31.74800024	234.230003	0.4411764706	0.009707466355	0.1077084149	266	0.09399231203	0.262171993
1	6602104	6606028	AT1G19110	0.7630967459	+	111	98	96.29000092	21.01000071	222.2475014	86.45999908	20.51950026	242.6482475	0.1505791506	0.1725453477	0.5065535506	5138	0.245495494	0.3925914824
1	6608114	6609369	AT1G19120	2.421969436	+	91	112	74.26999664	19.52000046	187.9899979	53.58499908	12.36875033	177.597504	0.2451923077	0.003784692191	0.05718347297	3762	0.000678575678	0.01313328559
1	6609324	6610613	AT1G19130	0.3068892532	-	121	71	92	26.82999992	274.4599915	86.5	14.94750023	220.9375038	0.1218717262	0.4932995812	0.7841327005	3930	0.1630656008	0.3328967726
1	6610651	6612609	AT1G19140	0.9397457797	-	55	74	77.69000244	18.63699989	203.2830017	61.34499931	14.97925043	204.9239937	0.2076167076	0.1148825906	0.418291196	1628	0.02644014624	0.1397735633
1	6612629	6613972	AT1G19150	5.536116358	+	386	688	68.87000275	12.66000032	161.8625069	52.55500031	10.60050006	148.1144978	0.1635362694	2.909937374e-06	0.0001614348844	109567	9.685752675e-07	5.520879025e-05
1	6616601	6619006	AT1G19170	0.7064679813	+	34	33	56.43499947	20.23850079	205.9304962	89.31999969	15.50600033	202.7519958	0.2540106952	0.1965766903	0.5390872853	460	0.1037639083	0.2740702176
1	6621776	6623668	AT1G19180	0.1864073196	+	167	91	68	15.99450049	151.1974953	72.26999664	18.90499973	168.5699959	0.09422912417	0.651017526	0.8747841121	6960.5	0.132828232	0.3062592564
1	6627682	6633133	AT1G19220	0.002134577428	-	14	34	88.99000168	25.04749908	177.9872467	84.06499863	25.59650006	196.2705002	0.1260504202	0.9950970129	0.9999976789	236	0.4864291626	0.4966805675
1	6649242	6650446	AT1G19240	0.8222798289	-	42	59	53.40999985	18.50825	112.8597506	44.61999893	14.08399987	120.5355007	0.2231638418	0.1505636627	0.4748405523	1015	0.06178105946	0.2173251934
1	6662416	6666032	AT1G19270	0.6050525833	+	23	19	134.1699982	62.53949833	307.389502	101.1999969	25.93850002	203.536496	0.3020594966	0.2482832472	0.5956773093	143	0.0290266295	0.1459363749
1	6666073	6669576	AT1G19290	0.1897217026	+	17	14	102.0599976	42.47599945	305.8640015	100.2799988	53.56550045	202.4887474	0.2521008403	0.6460680991	0.8735091941	102	0.2562485396	0.3998553408
1	6671094	6672777	AT1G19300	0.1934316564	-	28	23	60.02499962	18.50325019	113.7850023	76.59999847	11.31649981	141.5105042	0.200310559	0.6405725786	0.8703984842	276	0.1945240677	0.3569869339
1	6676209	6677680	AT1G19310	0.3724683952	-	61	72	66.94000244	10.83500004	138.0749969	70.11000061	17.64874983	150.7812458	0.1491347905	0.4241618502	0.7381695992	2055.5	0.2636370597	0.4028236644
1	6680422	6683559	AT1G19330	0.6563784729	-	40	36	93.44000244	22.80650082	185.3752567	59.53499985	12.76125002	171.1149998	0.2333333333	0.220608137	0.5664262977	530	0.02433946574	0.1338026227
1	6688462	6691216	AT1G19350	1.217690253	+	286	256	77.97000122	15.7837497	181.9249954	69.17499924	11.72249985	218.1887531	0.1125163899	0.06057727692	0.3066363922	33582.5	0.04826322934	0.1911981571
1	6690398	6692566	AT1G19360	0.03289345309	-	120	98	60.20499992	14.80925038	160.1279953	61.20999908	16.81125035	149.1795059	0.07295918367	0.9270572335	0.9884217793	5597	0.2709988066	0.4060355294
1	6692723	6695055	AT1G19370	0.4215482472	-	25	26	57.81000137	25.06200027	138.85	66.125	19.98750019	166.8299942	0.2446153846	0.3788364452	0.7054949047	271	0.1567130118	0.3278275331
1	6697873	6698858	AT1G19380	0.1674951305	+	47	30	61.79999924	18.97150002	144.8964943	54.60000038	7.766000015	176.3574978	0.1624113475	0.6799936694	0.89122705	660	0.3210267442	0.4330107393
1	6709777	6711788	AT1G19396	0.3892221422	+	22	30	72.46500015	21.69375	202.265752	90.06999969	18.88249942	217.4182438	0.2393939394	0.4081105839	0.7253469475	291	0.2378965048	0.3883888236
1	6712021	6714483	AT1G19400	1.122104807	-	144	276	77.94499969	14.52674963	170.7534977	66.47000122	11.37625027	198.8912487	0.1298309179	0.07549100256	0.3406587154	17465.5	0.02079717854	0.1243467668
1	6724412	6728075	AT1G19430	0.3258151521	-	44	75	83.82500076	14.15024972	186.0787502	72	15.27199965	249.1495071	0.1563636364	0.4722640073	0.7702111303	1503	0.2099899964	0.3686237437
1	6728746	6730931	AT1G19440	0.1196191073	+	36	52	57.79999924	11.9912504	151.5262508	61.625	14.87900014	126.3644964	0.141025641	0.7592431681	0.9257342215	859	0.2580921794	0.4006381226
1	6731410	6735024	AT1G19450	3.390783689	-	115	146	113.6100006	22.17099981	270.7214935	70.27000046	11.6137501	236.2825012	0.2528290649	0.0004066458185	0.01119431245	6010	4.102534989e-05	0.001373362798
1	6744352	6746635	AT1G19480	0.4902367635	+	18	19	74.74000168	19.75774951	139.4544987	65.19999695	21.10950012	189.8315002	0.298245614	0.3234172921	0.6624994158	132	0.1210218211	0.2948185094
1	6746777	6751609	AT1G19485	1.755310725	+	22	32	142.3499985	31.76200056	250.3495071	183.0200043	45.79800134	400.8352638	0.4090909091	0.01756666322	0.1571270461	226	0.0135747723	0.09710104101
1	6756236	6757420	AT1G19510	0.1819740938	-	15	12	48.68000031	28.40750055	176.5884987	50.93000031	22.26399975	107.1490034	0.2666666667	0.6576970686	0.8781359895	86	0.4321973899	0.4784454732
1	6759858	6762847	AT1G19520	0.1239617716	+	45	72	59.47000122	11.56000032	180.0139954	57.34499931	13.74400003	132.5120022	0.125	0.7516890579	0.9222419563	1597	0.4498442451	0.4846426526
1	6763764	6765049	AT1G19530	0.2346014781	+	99	68	57.74000168	12.94100003	163.7454994	52.52000046	15.11125023	157.7207516	0.1197266786	0.5826376187	0.8402313031	3279	0.3890635986	0.4625301896
1	6765652	6768290	AT1G19540	0.07545647764	+	27	28	100.9599991	19.05999937	222.3325005	84.60499954	12.40825002	183.5322487	0.1600529101	0.8405112338	0.9570154103	324	0.1838687783	0.3491264807
1	6773301	6774523	AT1G19570	2.746082851	-	954	1063	66.95500183	15.14974966	157.4697533	58.95999908	13.82150006	176.0775017	0.08306856707	0.001794391275	0.03256114504	463779	0.0004606273507	0.009874953602
1	6774682	6777568	AT1G19580	0.5367305387	+	81	96	73.63999939	16.77000046	158.25	68.80999756	14.53374982	177.4187508	0.1450617284	0.2905825036	0.6392252575	3758.5	0.3520347742	0.4469733354
1	6778886	6781222	AT1G19600	0.04723726408	+	174	184	67.63500214	14.14199977	232.3745026	71.19499969	15.95075049	223.4152481	0.05984507746	0.8969386444	0.9776807058	15763	0.4013606815	0.4670384682
1	6796136	6799764	AT1G19650	1.300315374	-	45	40	130.3600006	31.47800045	298.6839996	87.82500076	15.62324996	256.2262562	0.2861111111	0.05008234158	0.2753202855	696	0.03658910736	0.1657368535
1	6799968	6802906	AT1G19660	0.01684200004	-	423	379	70.41000366	13.70899982	211.4554985	73.38999939	11.51150031	210.5110008	0.03526138837	0.9619621846	0.9984321852	79529.5	0.4239148678	0.4757672923
1	6803485	6805092	AT1G19670	0.9280368955	-	335	294	68.54000092	12.47799988	156.7400009	61.0700016	11.86549981	153.5110069	0.09409077064	0.1180220366	0.4246832993	45290	0.04101161062	0.1758418172
1	6805429	6807862	AT1G19680	0.127807085	+	85	84	81.08000183	14.4579998	158.1729965	74.81499863	12.6885	186.1829979	0.1023809524	0.7450628598	0.9200800483	3372.5	0.2678205127	0.4044278459
1	6807714	6809642	AT1G19690	0.2416172049	-	39	32	136.0800018	11.71349978	263.9170105	150.8199997	30.96749983	224.3420013	0.1802884615	0.5733011264	0.8347958197	585	0.3281903084	0.435646132
1	6809584	6813063	AT1G19700	0.6591742865	-	46	96	89.46500015	26.77125001	153.126255	91.18500137	20.28124976	200.5062561	0.1838768116	0.2191925118	0.5653132297	2184	0.4592030793	0.4867713254
1	6814703	6816876	AT1G19710	0.07342873192	+	46	33	77.83499908	13.88000011	202.5587444	93.23000336	22.06600037	180.95	0.1357048748	0.8444448046	0.9583520825	672.5	0.1963056961	0.3582751497
1	6816701	6819542	AT1G19715	0.2261839043	-	79	69	135.5800018	19.32999954	235.935006	128.8399963	28.13200035	241.7810013	0.1240139424	0.5940405558	0.8459681575	2508	0.2021117708	0.3626189518
1	6819563	6822711	AT1G19720	0.07083489285	-	79	71	107.4300003	21.2910008	266.3409973	101.75	14.35749984	245.7625008	0.0977001248	0.8495033721	0.9596566278	2588	0.208096882	0.3674425335
1	6822846	6824071	AT1G19730	1.694517536	-	46	80	79.64500046	9.320000052	150.1937466	46.99500084	10.60349989	169.3359928	0.2733695652	0.02020609842	0.1701659118	1451	0.02449976953	0.1342269695
1	6824321	6825459	AT1G19740	0.4472173532	+	261	494	67.34999847	13	137.7750015	65.00999832	11.52725005	148.766	0.07021421813	0.3570940771	0.6881944325	62205.5	0.213796612	0.3710522632
1	6832324	6833837	AT1G19770	0.4403909283	+	197	222	66.05999756	12.5499999	170.3020065	62.67499924	13.4250001	145.886998	0.08912973888	0.3627513786	0.6918478748	19850.5	0.05160649026	0.1976548975
1	6846337	6848128	AT1G19800	0.6716134302	+	86	111	76.04999924	19.76250029	171.9474945	62.40999985	12.4775002	181.6300011	0.1490676723	0.2130034167	0.5582410136	4063	0.03691052562	0.1661609637
1	6855898	6860563	AT1G19835	0.4183487737	-	82	81	79.25	12.69325008	161.6952454	70.91000366	9.069999695	158.5399933	0.1392652815	0.3816376617	0.7078998741	2927	0.09576563164	0.2641277905
1	6872274	6873358	AT1G19840	0.840825672	-	21	11	78.08000183	27.89999962	116.6399994	41.56999969	12.96750021	104.4400005	0.4025974026	0.144269434	0.4661974708	67	0.02842599377	0.1445667668
1	6886668	6891404	AT1G19850	0.002393700807	+	48	48	88.48000336	14.67275031	213.8719948	85.95999908	22.12799926	243.4514984	0.08333333333	0.9945034618	0.9999976789	1099	0.350229639	0.446073239
1	6891381	6894752	AT1G19860	0.2143172412	-	50	58	80.11999893	16.57675033	278.2105118	84.24500275	16.20049977	209.13325	0.1427586207	0.6104959101	0.855695087	1379	0.332007105	0.4379218593
1	6895008	6898818	AT1G19870	0.4854446252	-	71	119	90	23.01499987	198.5724983	93.38999939	13.62549963	230.9265045	0.1396614984	0.3270057391	0.6661530884	4127.5	0.3962185102	0.4649633494
1	6900336	6904155	AT1G19880	0.2069819085	-	59	62	103.1900024	21.13449926	231.357003	97.79499817	17.78399982	205.3404984	0.1336796063	0.6208948985	0.8613855973	1631	0.1528864543	0.3245515719
1	6913000	6914634	AT1G19910	5.598783061	+	607	919	61.59999847	15.54049973	176.2869949	47.81999969	13.75750046	174.6070068	0.13542225	2.518934876e-06	0.0001435792879	238424	7.69706861e-07	4.47507569e-05
1	6914517	6916823	AT1G19920	0.07996186173	-	162	192	77.375	15.77524977	228.9859951	83.11500168	17.22199936	227.2932518	0.06558641975	0.831836817	0.9526231776	15086	0.3137405488	0.4294489308
1	6927735	6928656	AT1G19960	1.342018406	+	126	27	48.44999886	9.741250277	139.9575005	33.58000183	11.97549992	87.78249931	0.2830687831	0.04549687771	0.2615147866	1215	0.01007460991	0.08176128143
1	6931011	6932826	AT1G19970	0.9180710272	-	14	35	121.1549988	22.64949989	204.2219975	79.40000153	10.75	186.9944969	0.3571428571	0.1207616318	0.4296867364	184	0.09029418005	0.258561656
1	6935217	6936928	AT1G19990	0.4752544742	+	41	31	80.95999908	27.25	138.5200043	80.55000305	14.49749994	179.8000031	0.2171518489	0.3347692242	0.671017342	616	0.4144635774	0.4717115415
1	6937718	6940832	AT1G20010	4.219792312	-	253	431	65.95999908	14.27800007	176.1550018	49.5	12.6875	166.3300018	0.1788652183	6.028478112e-05	0.00236183098	44099.5	1.476124128e-05	0.0005976452425
1	6942624	6945091	AT1G20020	1.656379792	+	727	937	108.6399994	16.5694994	237.9060013	107	15.33800011	262.6640076	0.07373763027	0.02206074672	0.1797034016	322558	0.03174835832	0.1535137685
1	6945424	6947344	AT1G20030	0.1018799167	+	24	29	64.21500015	21.84850025	248.0157528	51.95999908	9.938999748	155.3659973	0.1724137931	0.7908972825	0.936837632	310	0.2514064775	0.3968726151
1	6949042	6950509	AT1G20050	2.018157965	+	201	213	70.41000366	15.68000031	197.9199982	59.54000092	11.56300001	173.9180069	0.1586434027	0.009590517332	0.1066550646	17895.5	0.001956984371	0.0282190157
1	6958009	6959123	AT1G20070	0.02620694205	-	51	67	77.86000061	29.32500076	167.1224976	79.25	21.92649965	186.686998	0.09599063506	0.9414408915	0.9923019113	1667.5	0.4129300957	0.4711188684
1	6966841	6969009	AT1G20090	4.081044421	+	99	274	83.38999939	15.91600022	187.0244995	55.07999992	11.46850002	191.0757519	0.2593452776	8.297658923e-05	0.003100423456	10107.5	8.577659994e-05	0.002473735873
1	6969024	6971036	AT1G20100	0.1784075903	-	179	159	121.1200027	32.23849926	234.5814995	125.6100006	14.74600019	243.5330032	0.0782825621	0.6631204322	0.8806263575	14040.5	0.4163122372	0.4725511075
1	6971423	6975130	AT1G20110	3.187729607	+	110	127	109.6699982	21.53625031	219.3857471	73.44000244	13.97199993	205.203997	0.2565497495	0.0006490384011	0.0154398906	5520.5	0.002707213544	0.03522770713
1	6986311	6987863	AT1G20140	0.321296254	+	42	43	85.71500015	29.07349968	151.473996	67.86000061	15.35550013	161.3069984	0.1771871539	0.4772036381	0.7743807223	737	0.07287288052	0.2350345627
1	6990641	6993989	AT1G20160	0.4018951804	-	26	31	60.56999969	16.67374945	144.3675022	56.15999985	22.44999933	193.4425011	0.229528536	0.3963736899	0.7175602917	391	0.4269087599	0.4763205858
1	6998334	6999839	AT1G20190	0.8403185136	-	52	129	82.26499939	13.5027499	180.7427544	69.80999756	18.74800072	190.2599945	0.1841085271	0.1444380067	0.4665347617	2709	0.02166035947	0.1268542923
1	7001086	7004432	AT1G20200	1.052416353	-	183	190	66.44999695	19.36050005	168.7974998	58.41500092	12.16049993	161.0235001	0.1275524878	0.08863059131	0.3696160437	15385	0.02738069755	0.1424403862
1	7004823	7007717	AT1G20220	0.04312506177	-	86	95	59.45000076	10.94375026	158.2749958	57.31999969	11.25349984	188.2984993	0.08261933905	0.9054718188	0.9801916204	3988	0.3919888073	0.4634362626
1	7007755	7009380	AT1G20225	1.535738566	-	130	158	63.25	11.47474971	174.5709991	50.62000084	9.814249921	150.8352474	0.1695228822	0.02912469822	0.2080383297	8584.5	0.008293165475	0.072571439
1	7016598	7020690	AT1G20260	2.249266299	+	371	393	77.04000092	16.11750078	219.7825012	70.06999969	11.99799976	194.8639954	0.1228987058	0.005632921523	0.07606291333	67055.5	0.02759757811	0.143158743
1	7020663	7023162	AT1G20270	0.2215794924	-	37	46	107.2900009	19.09100075	214.6209991	95.93000031	12.31499994	183.7062492	0.1639247944	0.600372108	0.8495548034	719	0.114149903	0.2858664439
1	7029628	7031535	AT1G20300	0.03992601398	+	24	18	79.06499863	27.60124998	131.2764999	73.04000092	15.78074975	122.7832495	0.1666666667	0.9121662219	0.9822341674	203	0.3753542245	0.4576033004
1	7038526	7040231	AT1G20330	1.777875174	-	339	551	52.18999863	13.04899969	169.2870003	46.36999893	12.09999967	141.7249985	0.1058574113	0.01667726485	0.1525255528	85348	0.01536660707	0.1038371147
1	7042045	7043392	AT1G20340	10.90024609	-	16266	19083	52.5	13.11999989	131.6399994	49.58000183	12.96000004	138.2055061	0.03827279937	1.258212265e-11	1.828811527e-09	149922544.5	1.684553918e-08	1.275259958e-06
1	7051576	7053745	AT1G20370	0.9111088612	-	37	40	69.54000092	17.31699963	117.9639977	48.33499908	14.16550026	118.7347528	0.2608108108	0.1227131597	0.4326756555	562	0.03516979222	0.1622834698
1	7078803	7082566	AT1G20410	1.76067386	-	24	18	102.704998	45.27200079	213.3817448	78.94000244	12.37825024	171.1155018	0.4583333333	0.01735106513	0.1557737688	153	0.05608363581	0.2071076338
1	7083011	7083910	AT1G20430	0.4900438578	-	134	146	55.10500145	15.51150045	144.8252522	54.82500076	14.34625018	157.8887444	0.1122469843	0.3235609801	0.6624994158	9341.5	0.2578226993	0.4005964643
1	7084408	7086873	AT1G20440	3.656180408	-	547	657	53.29000092	10.62100019	150.2379974	41.34999847	10.09199982	155.428006	0.1226476784	0.0002207087708	0.006928729987	155786.5	3.461592137e-05	0.001192280609
1	7087902	7089606	AT1G20450	1.495040932	-	346	347	66.02000046	11.71875	151.9250031	57.09999847	9.668000078	147.5339951	0.1081940997	0.03198593627	0.2183644024	53792	0.008954574385	0.0763818889
1	7090940	7093442	AT1G20460	0.3814695202	+	38	49	76.52500153	16.66575048	124.993248	64.95999908	14.67199974	164.1040039	0.1852846402	0.4154612083	0.7323529319	839	0.2168036141	0.3739457139
1	7094259	7094869	AT1G20470	0.5396208054	+	19	20	51.58000183	26.1300005	142.7464989	78.86499786	12.68900003	180.4642509	0.3	0.2886550731	0.6370098057	188	0.4831910109	0.4952658294
1	7103361	7106121	AT1G20510	0.04929929772	-	92	94	64.02000046	15.53324978	184.3299953	68.01499939	13.99949989	182.9585037	0.08302497687	0.8926900668	0.976159936	4303	0.4777335675	0.4936625483
1	7112610	7115362	AT1G20540	0.6790172129	+	64	57	128.1300011	25.47424994	249.5337547	95.27999878	11.07400017	254.5560028	0.1885964912	0.2094029459	0.5536337034	1435	0.02183118073	0.1273339534
1	7119670	7121871	AT1G20560	0.6062701396	-	60	49	75.84500122	18.03400016	182.1290012	80.88999939	13.37799988	170.65	0.1914965986	0.2475881532	0.5950221242	1337	0.20979954	0.3685450415
1	7126746	7128762	AT1G20575	1.808142579	-	49	47	88.76000214	18.0779995	218.7820007	52.18999863	11.13849978	148.6215012	0.3091619627	0.01555454892	0.1466182675	759	0.002032620346	0.02893647083
1	7128866	7130799	AT1G20580	0.8557521322	+	147	240	67.19000244	15.97800002	158.5769974	62	9.718750262	186.290744	0.1192176871	0.1393952156	0.4595646328	16290	0.1032004282	0.2735880952
1	7142971	7146540	AT1G20620	20.37459479	+	7196	3997	72.06000137	16.42000008	185.3712559	61.84000015	14.3050004	185.1399963	0.09601461797	4.220901402e-21	1.614494786e-18	12766702.5	3.211444112e-23	1.111389052e-20
1	7146635	7150180	AT1G20630	0.8817297414	+	105	111	89.16000366	16.05400009	201.0920013	83.55999756	13.95499969	255.029995	0.155984556	0.1313016727	0.446599977	5320.5	0.1349533638	0.3082405302
1	7154409	7158287	AT1G20640	0.3142203327	+	36	40	76.79000092	20.02750051	132.0862503	72.27000046	19.7597497	166.5877541	0.1861111111	0.4850423589	0.7787573938	667	0.2924764981	0.4187398274
1	7157825	7160590	AT1G20650	0.1023811469	-	131	175	86.69999695	10.91999984	231.7500038	88.54000092	12.28450012	204.759996	0.07411123228	0.7899850145	0.9362067194	11119	0.3271201096	0.4351721392
1	7164081	7168041	AT1G20670	0.1516780453	-	35	38	81.79000092	12.68400011	189.5624969	73	20.13825035	196.8797562	0.1593984962	0.7052156715	0.904203019	628	0.3434615645	0.4430749266
1	7176746	7178895	AT1G20693	1.775330713	+	1050	684	72.15000153	15.60400014	180.7287548	63.21999931	14.30525017	188.3362556	0.07550543024	0.01677526106	0.1527746989	333318	0.005702569649	0.05708460733
1	7179272	7181574	AT1G20696	2.085958468	+	434	406	81.56000137	27.83500071	170.6097527	74.97999954	20.10874915	182.7162495	0.1134593993	0.008204299995	0.0967149233	80045.5	0.01093917484	0.08559116553
1	7209297	7214993	AT1G20760	0.6145288557	+	73	81	89.65000153	20.74799995	204.7619995	94.58000183	21.32999992	236.5200043	0.1620158972	0.2429244031	0.5900578542	2716	0.1925805985	0.3553134042
1	7215009	7216897	AT1G20770	0.1416432928	-	64	65	68.87999725	14.62725029	176.6172455	71.81999969	15.06599979	194.2679962	0.1192307692	0.7217000031	0.9117696258	1995.5	0.3461678415	0.4439572509
1	7217020	7220842	AT1G20780	1.178918283	+	20	27	82.09500122	35.23725095	142.283252	59.45999908	19.18249979	169.8849983	0.3685185185	0.06623411189	0.3207973396	215	0.1204674348	0.2943374182
1	7231980	7233657	AT1G20810	0.17633753	+	116	128	89.05999756	18.12000084	207.092495	88.75	12.65074975	213.9944931	0.09159482759	0.666288734	0.8826884035	7091	0.2729548377	0.4072318985
1	7233653	7235128	AT1G20816	0.4870467646	+	36	44	59.36000061	12.34125042	160.0650005	72.07500076	13.80450034	146.1780018	0.2070707071	0.325801617	0.6648219153	698	0.1829349484	0.3483141643
1	7238692	7239698	AT1G20823	0.0502064019	+	24	13	53.60499954	11.07274987	148.0274965	50.08000183	19.60600033	132.1180008	0.1891025641	0.8908274647	0.9756164113	143	0.3454337867	0.4439572509
1	7242895	7244978	AT1G20830	0.2156800089	+	45	59	83.91000366	20.92900047	212.9859955	81.41000366	12.81450019	204.2905014	0.1465160075	0.6085832444	0.8547451404	1266	0.3444990213	0.4434768689
1	7244938	7248494	AT1G20840	1.535205605	-	34	32	107.920002	37.51774888	212.0412483	83.52500153	33.56549878	146.4027431	0.3455882353	0.02916046162	0.2081590032	330	0.003078682049	0.03851002029
1	7252110	7253747	AT1G20850	0.459344317	+	107	125	58.95999908	16.95699987	203.5679977	52.95999908	15.24100008	137.4459991	0.1208971963	0.3472607373	0.6819307068	6293.5	0.2200080931	0.375735427
1	7262008	7265555	AT1G20880	0.4766844781	-	44	47	103.0950012	12.29825032	194.3114944	78.06999969	14.07850003	246.0320053	0.1924564797	0.3336687404	0.6709382759	949	0.2510828862	0.3967699229
1	7265793	7267377	AT1G20890	0.1952740744	-	40	37	63.84499931	15.41049995	156.3989952	72.87000275	12.81899958	259.296991	0.1641891892	0.6378608182	0.8695816751	690	0.3068911651	0.425767587
1	7272555	7274072	AT1G20900	0.04505784317	+	30	37	74.11000061	25.39374971	120.9815016	68.04000092	19.51099958	163.4810013	0.1351351351	0.9014510664	0.9789454072	543	0.4423548407	0.4820533521
1	7276942	7281236	AT1G20910	0.1789718548	-	34	33	91.79000092	15.2095	216.5404987	78.11000061	16.28399963	264.376001	0.1720142602	0.6622594211	0.8803494767	550	0.4476175971	0.4839254821
1	7285041	7289943	AT1G20920	0.1109014031	+	37	30	118.8799973	35.70799828	306.1820068	117.2799988	26.5630002	226.3767513	0.1567567568	0.774637642	0.9313422235	537	0.4126807434	0.4711188684
1	7292388	7294746	AT1G20930	0.5270816678	-	11	15	106.1500015	27.6050005	160.7950058	71.31999969	23.20000019	127.048003	0.3636363636	0.2971107271	0.6446491146	62	0.1496353552	0.3214166045
1	7297238	7301633	AT1G20950	2.492648582	-	85	107	96.23000336	16.68299961	241.0350037	69.91999817	14.97150006	202.2609993	0.2555250137	0.003216261989	0.0508261037	3467	0.002372878335	0.03208352242
1	7301598	7310271	AT1G20960	0.93136704	-	102	109	92.63999939	34.97774992	222.7752529	75.93000031	18.04000053	215.263002	0.1610901241	0.1171205114	0.4234693117	4550.5	0.01147042962	0.0881198174
1	7313900	7319921	AT1G20970	0.5793431918	+	21	35	74.66999817	23.61499977	135.6449966	55.11000061	11.38249969	126.7634983	0.2666666667	0.2634248905	0.6121312203	290	0.09625878622	0.2647981373
1	7324470	7329441	AT1G20980	0.4522553862	+	142	85	90.54000092	23.98000026	187.3352436	91	15.46900024	202.5239944	0.1251864126	0.352975542	0.6854374754	5869.5	0.3652159097	0.4522670512
1	7337604	7339452	AT1G21000	4.619135137	+	245	194	77.83999634	12.13999987	174.3960068	49.98999977	8.620750308	192.9997559	0.2258994319	2.403614763e-05	0.00109518936	19102.5	0.0002066458473	0.005143146216
1	7346155	7347283	AT1G21010	0.02253674869	+	33	28	59.56000137	22.23200035	133.9220001	63.64500046	14.56750026	135.5279972	0.1287878788	0.9494306578	0.9954783914	412	0.2368679134	0.3879896637
1	7366589	7368203	AT1G21050	1.09625999	+	288	279	73.69500351	9.268750262	142.2869949	66.58000183	10.85499969	155.7590042	0.1053987455	0.08011982835	0.3522509695	36423	0.02716788625	0.1416159193
1	7371656	7374114	AT1G21060	0.1516139245	+	58	94	124.2399979	18.57449951	221.3272457	118.9300003	14.78599977	268.0210106	0.1148202494	0.7053197997	0.904203019	2497.5	0.1935816526	0.3561592981
1	7374114	7375789	AT1G21065	0.3898752217	+	413	610	68.58000183	13.24400024	210.0559967	75.77000046	11.74150012	213.1789986	0.05622196642	0.4074973401	0.7252010916	122552.5	0.2309004307	0.3837779028
1	7375868	7378227	AT1G21070	0.01971622768	-	29	28	73.19999695	27.10199947	194.7869934	75.04500198	8.683749759	171.378001	0.1305418719	0.9556167916	0.9969554992	402	0.4777233007	0.4936625483
1	7378537	7382661	AT1G21080	1.284607738	-	103	124	84.72000122	15.69549971	216.9339966	72.4600029	11.82175002	190.122504	0.1769495772	0.05192688392	0.2816258425	5564	0.04769381446	0.1902908573
1	7384559	7386580	AT1G21090	0.0669196095	+	25	21	101.4499969	20.64799957	198.8859985	72.73999786	26.43000031	197.2450027	0.1714285714	0.8571965027	0.9635257263	243	0.3376074949	0.4407141924
1	7386761	7388512	AT1G21100	0.3553624121	-	105	73	71.43000031	20.46000061	205.4319977	77.26999664	18.56400032	165.3319946	0.1292889759	0.4412021172	0.7480069128	3593.5	0.2403001653	0.3895297035
1	7398813	7400736	AT1G21130	0.4801775051	-	336	381	59.21500015	11.80500019	160.5500011	53.75999832	10.41499996	165.9899979	0.07020997375	0.3309958091	0.6694995943	61945.5	0.228120919	0.3815139291
1	7407930	7413295	AT1G21160	0.1617328978	-	29	19	131.6799927	93.43500061	221.587999	153.7200012	67.75900116	257.9305038	0.2014519056	0.6890759653	0.8971599465	264	0.4083060339	0.4695994044
1	7412829	7419643	AT1G21170	0.5868460921	+	17	21	134.2299957	57.36600037	213.8480011	115.0699997	18.1050005	239.4050064	0.3137254902	0.2589130304	0.6072898435	141	0.1386863326	0.3116550543
1	7419663	7420957	AT1G21190	0.06333157213	-	89	137	76.43000031	15.24399986	179.1960052	72.70999908	12.48599987	216.7079987	0.08020995653	0.8643077911	0.9649373405	6023	0.4395932048	0.480786449
1	7421147	7423673	AT1G21200	2.777630573	+	26	18	82.28499985	24.97875023	207.5275002	47.80999947	9.465249991	136.4467497	0.5512820513	0.001668666038	0.03106454602	115	0.002337212079	0.031748951
1	7442217	7442979	AT1G21260	0.397295967	-	14	18	79.30500031	21.63949952	152.6445011	60.51499939	15.13099959	111.4470015	0.3015873016	0.4005936243	0.720622318	87	0.07180293483	0.2332032224
1	7444748	7448483	AT1G21270	0.1108594308	+	121	61	72.91999817	7.929999828	168.3300018	68.51999664	11.26999998	194.8949966	0.1016122477	0.7747125104	0.9313422235	3433	0.221831717	0.3767855023
1	7447489	7448483	AT1G21280	0.1203040246	-	22	41	57.03000069	25.58049946	138.5714956	64.30999756	14.07999992	119.6299973	0.1707317073	0.7580467243	0.925235187	449	0.4913728999	0.4982304897
1	7453244	7455009	AT1G21310	0.834884386	-	1044	182	70.99500275	19.67250075	179.7957565	65.90999985	18.13625021	190.031007	0.0909119616	0.1462566474	0.4697989768	87568	0.0458100605	0.1860817583
1	7476901	7479258	AT1G21350	0.2273581625	-	102	144	95.18000031	17.08025022	242.4517517	96.70999908	15.46824992	253.1425003	0.09803921569	0.5924365408	0.8453325476	7121	0.3428635349	0.4429411068
1	7483780	7485666	AT1G21370	0.7727590038	+	28	28	79.72999954	21.76649976	186.3310055	53.77000046	9.30799973	196.2247547	0.2857142857	0.1687489177	0.5008710474	311	0.09356107784	0.2619722729
1	7485635	7488780	AT1G21380	1.004017818	-	79	72	88.19000244	16.54450016	170.8080063	81.25	14.34900041	208.7862553	0.195323488	0.09907912939	0.3899580681	2526	0.1184326319	0.2918152747
1	7489045	7490803	AT1G21390	0.007575368992	-	25	19	84.56999969	13.36000023	181.4360016	84.87000275	12.82700014	186.1934982	0.1347368421	0.9827083155	0.9999976789	221	0.3523055847	0.4469733354
1	7493212	7496741	AT1G21400	0.1877055695	+	291	299	93.25	19.0425005	203.3199959	92.15000153	16.43050022	200.0134987	0.06005125907	0.6490743252	0.8740754854	42630.5	0.3365248014	0.4402293213
1	7496997	7499616	AT1G21410	0.2972020204	+	52	72	61.63500023	10.10824993	154.1770039	52.81499863	11.68224993	183.3469936	0.1463675214	0.5044265992	0.7901259229	1732	0.2399734619	0.3895046643
1	7502081	7504275	AT1G21440	0.5345287207	-	112	79	85.84000015	12.3797498	225.8684948	82	8.242000175	205.1889977	0.1411618445	0.292059461	0.6406136962	4068	0.172370958	0.3397629339
1	7508700	7511801	AT1G21450	1.88403028	+	57	56	82.91999817	11.69599991	211.9740051	63.24499893	16.38500011	156.5787487	0.290726817	0.01306079823	0.1311040762	1210	0.01342238244	0.0964042374
1	7511749	7513481	AT1G21460	0.3742295381	-	31	37	73.44000244	18.90499926	153.3649979	65.26000214	14.14300041	162.2539948	0.2066259808	0.4224452798	0.7368111393	474.5	0.1125841625	0.2843459257
1	7518945	7521552	AT1G21480	0.3237993153	-	31	26	80.37000275	13.78250003	326.5799866	109.4000015	12.24499971	247.6325073	0.2158808933	0.4744611801	0.7722612825	348	0.1912814857	0.3545667254
1	7529704	7531108	AT1G21500	2.623739326	-	1378	1555	66.74499893	15.08925002	173.8187523	60.77000046	14.24400001	167.9715027	0.06757965083	0.002378267354	0.04043054501	1027984	0.02894330925	0.1457695773
1	7534018	7534927	AT1G21520	0.9868441559	-	94	20	67.09500122	14.9412498	149.0207443	50.375	14.19674993	154.6547527	0.2893617021	0.1030755935	0.3961231685	737	0.06569443171	0.2238339503
1	7548449	7550741	AT1G21540	0.0819147353	-	13	13	61.77999878	30.15799961	107.9039986	71.61000061	27.91599922	115.4850029	0.2307692308	0.8281047289	0.9509759212	73	0.2863421666	0.4156994997
1	7554670	7557112	AT1G21560	0.1947934327	+	35	44	88.66999817	17.02599993	218.1214958	96.76499939	20.35225091	238.9557533	0.162987013	0.6385671413	0.8697126498	722	0.319609666	0.4325989643
1	7557139	7565914	AT1G21580	0.2787418591	-	12	16	112.4599991	79.18024921	195.1070011	124.8450012	51.68625021	265.0799961	0.2916666667	0.5263300195	0.8048613186	94	0.4722417901	0.4915169652
1	7566228	7570014	AT1G21590	1.012424871	-	180	174	104.5	21.03674912	190.1815014	87.41500092	15.80299995	246.5525024	0.1289272031	0.09717960494	0.3862380825	14410.5	0.09721887953	0.266140357
1	7570844	7573847	AT1G21600	2.767910343	-	118	178	90.35000229	13.59500024	179.8677555	71.625	12.82625027	184.2557522	0.2196724433	0.001706434635	0.03143602968	8427	0.00200589199	0.02864180174
1	7573829	7578963	AT1G21610	0.291947206	+	28	41	138.3250046	35.70075049	202.921999	124	25.67000008	246.3699951	0.1942508711	0.510567062	0.7937472436	522	0.2645667768	0.4031625057
1	7581007	7588153	AT1G21630	3.005309705	+	88	129	116.9900017	27.30124979	209.2557526	96.55999756	18.69199982	178.2160034	0.2647991543	0.0009878483874	0.02096676753	4308.5	0.001305394198	0.02115262504
1	7588413	7592890	AT1G21640	0.3789370815	+	73	126	102.2399979	19.51000061	211.7039948	87.25499725	14.93375015	202.5699997	0.1272015656	0.4178909043	0.7344877362	4232	0.1746214924	0.341788768
1	7592663	7604229	AT1G21650	0.7800384906	-	25	15	61.38000107	22.03999977	185.4180054	102.3000031	22.28549948	220.061499	0.3466666667	0.1659439828	0.496806548	132	0.06219335202	0.2178189984
1	7605619	7609223	AT1G21660	0.5754593273	+	36	65	81.55999756	17.40500081	327.1300049	73.91999817	13.30400009	193.7559967	0.2025641026	0.2657912458	0.6144680738	1033	0.1665556339	0.335861007
1	7610240	7612721	AT1G21670	0.1218752131	+	88	54	61.30500031	13.46050012	159.6874981	52.48999977	15.75650022	195.7982483	0.1136363636	0.7553092213	0.9243428081	2241	0.2859662641	0.4156091712
1	7612833	7615374	AT1G21680	0.5690888972	+	190	241	63.125	11.60174973	157.169252	57.97000122	13.76000023	145.3300018	0.09582878358	0.2697187279	0.6174770374	21327	0.111066734	0.2823001529
1	7615504	7618628	AT1G21690	1.099520003	+	73	73	92.20999908	13.40799999	210.4159943	65.5	15.00800037	185.3619934	0.2054794521	0.07952066389	0.3507619886	2165.5	0.02552387192	0.1372002508
1	7620000	7624166	AT1G21700	0.7551376426	-	66	56	87.81999969	17.20125031	172.7274933	60.39999962	10.30000019	204.9700012	0.1953463203	0.1757366557	0.5101218131	1552	0.06448173644	0.2217274756
1	7624319	7626138	AT1G21710	0.3041945475	+	26	34	90.71999741	28.46374977	191.1512489	86.70000076	10.47674997	193.7337479	0.2081447964	0.4963699166	0.7864007572	361	0.1149011073	0.2870059451
1	7626181	7628290	AT1G21720	2.566263053	+	221	255	77.95999908	12.40500021	175.8399963	59.93000031	11.93699975	192.8720039	0.1650075415	0.002714794416	0.04480435032	23633.5	0.00119997424	0.01986517719
1	7630106	7636658	AT1G21730	1.412939499	+	32	24	122.6399994	21.31849966	199.2037498	64.47000122	11.89300017	199.4832539	0.3645833333	0.03864208054	0.2390002837	320	0.1465494959	0.3190678435
1	7645609	7648855	AT1G21750	0.8640279714	+	288	194	80.36500168	14.89300027	187.3197563	70.98500061	11.73625004	196.7327484	0.1062786369	0.1367640738	0.4548892019	25395	0.04512306324	0.1843196595
1	7649193	7651816	AT1G21760	0.06544066915	+	85	119	74.51999664	14.25099983	198.6509933	68	13.54750009	196.6874992	0.08403361345	0.8601205637	0.963993669	4835	0.2966525728	0.4207088638
1	7651645	7652288	AT1G21770	0.02696555603	-	223	246	53.70999908	14.83149986	193.2779968	54.12999916	13.0137502	201.1212482	0.04859819899	0.9397978431	0.992032721	27297	0.464258279	0.4885373097
1	7651881	7654014	AT1G21780	0.3917352354	+	74	73	109.4350014	14.73750024	319.4402405	92	17.58199959	291.9099976	0.1436504998	0.4057558263	0.7243503973	2358	0.09226801276	0.2609718361
1	7654087	7655981	AT1G21790	0.5784967897	+	33	38	76.48000336	13.71200027	144.8619934	58.52500153	11.07275004	200.5660069	0.2312599681	0.2639387833	0.6128354976	548	0.1827345239	0.348261296
1	7660946	7662725	AT1G21830	0.3935952281	-	353	235	80.18000031	19.26399956	191.1840057	82.73999786	14.72800012	218.590506	0.07428123682	0.4040217746	0.7229157197	41013	0.4090660561	0.4695994044
1	7666413	7667794	AT1G21840	0.7839680569	+	37	47	96.40000153	41.96300125	320.9360107	100.8300018	14.14700003	221.8719994	0.2380678551	0.1644492674	0.4946751038	831.5	0.367726121	0.4536522316
1	7680389	7682641	AT1G21880	0.4794412147	+	60	56	96.81500244	13.27025006	201.297002	78.05500031	13.33374977	198.1062508	0.1714285714	0.3315574458	0.6695938983	1435	0.08837184856	0.2558734699
1	7690801	7692459	AT1G21900	0.02172988764	-	103	116	49.93000031	8.273000073	160.4269997	48.70000076	12.26500022	139.6375046	0.06888182123	0.9511962126	0.995748734	5812.5	0.3654232237	0.4523548907
1	7696426	7697831	AT1G21910	0.00339027379	+	43	29	70.69000244	11.66149964	166.229998	74.29000092	17.23199949	158.3450043	0.1002405774	0.9922239969	0.9999976789	605	0.4181354606	0.4731137007
1	7704172	7706254	AT1G21920	1.364270721	-	134	155	90.43000031	19.42549958	233.2115051	97.87999725	16.14549975	191.7419991	0.1608088589	0.04322443038	0.2542562103	9884	0.2399561218	0.3895046643
1	7712818	7714459	AT1G21930	1.384964251	+	100	103	51.85500145	12.36474977	155.5977463	71.91999817	12.62200022	184.3465004	0.1919417476	0.04121314421	0.248046812	4553.5	0.07717878956	0.2407799327
1	7734660	7738772	AT1G21980	1.651348961	+	109	96	105.1200027	18.26499958	224.6359985	83.08000183	14.57000017	166.375	0.2059441896	0.02231778242	0.1806960274	4212.5	0.008102492507	0.07146221395
1	7754280	7758029	AT1G22020	1.184342448	+	51	63	86.43000031	19.34499931	239.6550026	79.22000122	13.92100015	168.7835037	0.2399626517	0.06541201873	0.31844125	1347	0.06997206168	0.230361023
1	7767923	7770216	AT1G22040	0.3007335677	+	34	35	74.02500153	22.31774936	147.6254978	59.72000122	22.44049935	152.485495	0.1924369748	0.5003413918	0.7881013612	492	0.1093024857	0.2801584393
1	7771658	7773154	AT1G22050	0.1309546404	+	23	43	71.36000061	11.0914999	196.8789978	62.56999969	13.38449974	240.2684998	0.1698685541	0.7396825266	0.9179624656	477	0.4095228342	0.4698038197
1	7773062	7781539	AT1G22060	0.4634137724	-	63	54	101.0299988	39.62600117	202.839003	104.0750008	12.46049986	212.130246	0.1693121693	0.3440220089	0.6802061529	1657	0.4060053946	0.4688399469
1	7785707	7786477	AT1G22065	0.8469510697	+	19	14	81.37000275	18.25150046	158.4460014	49.32499886	14.64925001	164.6737497	0.3834586466	0.1422489044	0.4642092111	97	0.09798484613	0.2669089903
1	7789132	7792139	AT1G22070	0.229386676	+	73	53	81.80999756	20.4079998	177.9680054	81.47000122	10.11000018	250.989003	0.1359524425	0.5896758259	0.8433856749	1884	0.4024183545	0.4673963667
1	7814662	7815722	AT1G22140	1.038052588	-	150	205	60.08499908	12.73999996	212.8154968	53.79999924	12.39400034	184.8350021	0.1315447154	0.09161095529	0.3744559154	13268	0.0137099443	0.09730343217
1	7823065	7823971	AT1G22160	0.02987230747	+	74	56	46.38499832	11.86175025	195.6724987	43.45000076	10.70875001	154.6875	0.09314671815	0.9335287393	0.9901372027	2054	0.4672128677	0.4898540392
1	7826267	7828326	AT1G22170	0.03396550002	+	21	19	89.79000092	14.28499985	173.2299957	80.58000183	15.06099949	168.1230011	0.1654135338	0.9247716341	0.9882770165	192.5	0.4301257471	0.4774247984
1	7828325	7830424	AT1G22180	0.388414249	-	19	16	89.04000092	17.65049992	139.0920021	103.5149994	36.18249989	203.7662525	0.2861842105	0.4088704752	0.725987339	103	0.05413745122	0.2032597879
1	7835780	7837411	AT1G22190	0.9487629656	+	58	54	89.08499908	13.59150004	182.6427471	105.3699989	33.94200068	187.2142498	0.220945083	0.1125218942	0.4124693242	1299	0.06035339868	0.2148510041
1	7837562	7840898	AT1G22200	0.622986959	-	74	102	80.91500092	15.84424994	154.1035057	86.15499878	12.23524966	219.0567448	0.1542130366	0.2382391007	0.5860222251	3589	0.2901493511	0.41774171
1	7865434	7866176	AT1G22270	0.618015107	+	194	230	55.86999893	17.38524988	129.7732437	51.97999954	12.25024993	150.6527538	0.09896907216	0.2409821601	0.5882539411	21212.5	0.1914280001	0.3545821309
1	7873866	7876018	AT1G22280	0.9695742951	+	111	71	70.87999725	11.78000021	172.7125053	49.56000137	12.61249971	164.0775032	0.1800532927	0.1072570147	0.404404853	3235.5	0.02106921691	0.1253545099
1	7878758	7881395	AT1G22300	0.6211125837	-	566	519	65.11000061	15.5850004	167.1250019	61.36000061	10.61049991	195.5204956	0.06211660097	0.2392695409	0.5866891811	141599.5	0.1530451524	0.3247461737
1	7881502	7883824	AT1G22310	0.5332749821	-	20	24	119.579998	16.37575037	337.9852497	107.9799995	25.64624996	316.6610031	0.2833333333	0.292903808	0.6413613813	223	0.3486667631	0.4454632216
1	7886322	7889534	AT1G22330	2.011782389	+	15	21	96.13999939	56.07850113	338.9264992	49	15.60000038	237.3650055	0.5238095238	0.009732347589	0.1078198721	82	0.008051894873	0.07131888603
1	7894806	7897761	AT1G22360	0.626467874	-	80	33	53.05500031	15.85474963	181.5070011	62.38000107	5.369999886	121.9079987	0.2075757576	0.2363372218	0.5843105152	1310	0.476082846	0.4931910046
1	7903659	7906969	AT1G22400	0.1605327781	-	51	25	57.52999878	11.29499984	158.9000053	47.38999939	11.10599995	187.6099976	0.1678431373	0.6909827759	0.8980269995	622	0.4341426146	0.4793999434
1	7908567	7909708	AT1G22403	0.1608342359	-	13	14	134.2899933	79.22100143	391.6769989	161.3499985	63.16724777	241.5492455	0.2582417582	0.690503309	0.8979273867	84	0.37622138	0.4578347085
1	7911842	7915004	AT1G22410	2.763942156	+	263	288	65.80000305	16.86399975	156.9585014	51.69499969	13.12249973	176.0627529	0.1584679975	0.001722097927	0.03160441083	31037	0.0001253929542	0.003381422245
1	7919076	7921893	AT1G22430	1.68819292	+	130	137	141.1450043	14.77949972	304.621492	125.9599991	13.68000031	280.9639954	0.1823133071	0.02050251224	0.1715362838	7660	0.024232494	0.1334669573
1	7925120	7927345	AT1G22450	0.05774388291	+	191	232	56.74000168	11.31999969	186.2749977	58.23999977	10.85599992	185.3127453	0.05705000903	0.8754999328	0.9705889347	21691.5	0.3553851097	0.447842562
1	7949475	7950900	AT1G22500	0.0475438892	+	62	29	52.25499916	15.41474953	132.1685013	49.68999863	14.09899969	135.5540039	0.1251390434	0.896305602	0.9775667933	829	0.2769412844	0.4099543303
1	7950817	7952832	AT1G22510	0.5442788248	-	18	21	82.18500137	25.79350047	153.060746	66.80999756	22.73499966	275.5750122	0.3015873016	0.2855756508	0.6342582808	152	0.1519111819	0.3236717242
1	7952973	7954546	AT1G22520	0.4064248021	-	57	104	58.40999985	20.63600006	174.3800018	67.64500046	19.08699951	182.4142563	0.145074224	0.3922610603	0.7143564713	2709.5	0.1846274861	0.3498319008
1	7955444	7958564	AT1G22530	3.558276581	-	147	336	74.04000092	17.56100016	178.5209991	59.26000023	12.55124974	159.9649963	0.2057823129	0.0002765180076	0.008352328513	19821.5	0.0002769600223	0.006578155135
1	7963812	7966436	AT1G22540	0.790871283	+	29	20	95.19999695	16.5090004	219.8240051	69.10000229	20.27949996	174.3715	0.3120689655	0.1618559678	0.4911370565	229.5	0.1111290868	0.2823001529
1	7966499	7968692	AT1G22550	0.979766746	-	27	28	58.38000107	22.39400015	143.9725021	43.92500114	11.7615	254.9967491	0.3148148148	0.1047691098	0.4000049938	337	0.2476659638	0.394155785
1	7976423	7978810	AT1G22570	1.123089644	-	18	19	54.77499962	23.76225071	135.6059988	77.87000275	23.51499958	208.5314995	0.4005847953	0.07532000777	0.3403097025	118	0.05532147035	0.2054413826
1	7981721	7984334	AT1G22590	0.5979733005	+	83	103	59.38000107	14.87349987	153.5580017	66.43000031	13.54900022	203.0455025	0.1470347409	0.2523635916	0.600344485	4196	0.4153900367	0.4721744102
1	7994165	8002989	AT1G22620	0.4932986753	-	51	42	81.23999786	15.17750001	192.8125	70.11500168	12.95249953	173.2359928	0.1932773109	0.3211451183	0.6619177955	906	0.1020531774	0.2718192718
1	7994261	7997588	AT1G22610	0.04545881767	+	131	126	72.77999878	13.03999972	183.6674957	72.63999939	16.28750038	158.5912437	0.07003513874	0.9006191606	0.9789454072	8050	0.3669558695	0.4533061521
1	8003222	8004304	AT1G22630	0.1030611194	+	267	297	59.83000183	11.19400005	201.9585037	58.61000061	8.378000259	182.4359985	0.05440169485	0.788749107	0.9359513651	38770	0.3245884985	0.4339143206
1	8006063	8007465	AT1G22640	0.1064485917	+	145	145	71.62000275	19.32999954	155.752005	75.45999908	14.30800018	184.1980011	0.07586206897	0.7826208399	0.9350166091	10301.5	0.3840730563	0.460364585
1	8013352	8016150	AT1G22650	0.1599380554	-	14	25	92.56000137	20.74350038	217.0070023	94.95999908	15.76800041	134.1659973	0.2257142857	0.6919296556	0.8982258525	164	0.3792662208	0.4587637895
1	8017280	8021930	AT1G22660	0.5483938697	+	27	14	114.0800018	16.89400039	293.7024994	72.40499878	27.73350015	228.2260014	0.3095238095	0.2828825318	0.6315001689	154	0.1714364652	0.3388399541
1	8027125	8028168	AT1G22690	1.42473347	+	313	675	56.79999924	16.17600079	173.423996	50.59000015	15.3829998	176.771505	0.09555792214	0.03760681298	0.2364251846	96123	0.01130434173	0.08753788334
1	8028157	8030136	AT1G22700	0.4793612313	-	217	344	86.12000275	16.80400009	181.0940033	80.19499969	12.19850008	208.8649994	0.08115421713	0.3316185138	0.6695938983	35738.5	0.1983022307	0.3599482421
1	8030586	8033156	AT1G22710	1.666085702	-	245	428	63.90999985	14.91299982	185.0730026	57.79999924	11.34949999	168.2105049	0.119330536	0.0215731865	0.1770560507	48629.5	0.05869638973	0.2121796928
1	8046072	8049039	AT1G22730	0.07115371954	+	32	62	79.86499786	29.37675066	127.0117498	72.28499985	34.74524956	188.8657467	0.1290322581	0.8488799588	0.9595948205	985	0.4793182759	0.4938955863
1	8049089	8050784	AT1G22740	1.007031093	+	39	90	78.04000092	23.44699993	262.2764999	65.68000031	17.45700002	198.5375046	0.2290598291	0.09839406591	0.3885242456	1395	0.03262147594	0.1557664759
1	8050769	8052930	AT1G22750	2.24550813	+	98	231	94.18500137	21.23350043	191.294754	66.55999756	13.52499962	215.8649979	0.2031539889	0.005681877544	0.07632725518	8606	0.000293196818	0.006895818366
1	8061750	8067790	AT1G22770	0.03928653329	+	50	52	107.2299995	37.86549854	219.885743	105.0900002	35.0249999	282.3732597	0.1076923077	0.9135103384	0.9824698011	1281	0.4507214179	0.4848677523
1	8067863	8069356	AT1G22780	3.13363684	+	438	757	70.18000031	12.54249992	174.9977509	58.04000092	12.63100033	162.4230026	0.1184801819	0.0007351283308	0.01690678843	144650	0.0001183990032	0.003216690677
1	8069376	8071593	AT1G22790	0.00875383766	+	52	55	73.36000061	15.18349974	159.6209972	78.79000092	11.30449977	135.5360016	0.08846153846	0.9800453272	0.9999976789	1405	0.4393142725	0.480786449
1	8071788	8074357	AT1G22800	0.05131344338	+	31	32	83.13999939	15.12000012	209.5074997	100.7000008	13.15525028	183.1184998	0.1411290323	0.8885595862	0.9751010635	483.5	0.4344798682	0.4793999434
1	8071788	8075020	AT1G05767	0.02872016788	+	30	30	89.52999878	15.04800012	209.6442497	100.7000008	12.64975027	183.6315002	0.1333333333	0.9360085851	0.990598863	439.5	0.4412320311	0.4815880132
1	8079286	8080574	AT1G22840	0.4468012069	+	409	485	61.74000168	16.21600037	177.8620056	58.45999908	12.48699999	171.0800064	0.06165906284	0.357436413	0.6884757621	93794.5	0.08065729656	0.2452623024
1	8080481	8082882	AT1G22850	0.7944041254	-	381	532	66.19999695	14.09000015	195.7300034	60.44999886	12.04475024	203.5277485	0.07472421211	0.1605446636	0.489698352	94494.5	0.04061219222	0.1751626747
1	8083183	8089273	AT1G22860	0.29040185	+	17	19	130.2700043	32.28000011	233.1279938	109.0699997	9.034500313	223.8630005	0.2600619195	0.512387056	0.7947622976	120	0.09693952664	0.2659231074
1	8089266	8094505	AT1G22870	0.01525458568	+	20	20	110.1850014	37.33074951	211.2215015	112.8850021	40.09524965	205.3084969	0.15	0.9654847409	0.9990819787	195	0.451558248	0.4850567962
1	8098391	8101464	AT1G22882	0.07879511878	+	21	29	66.80999756	5.970000029	204.8150024	63.81000137	17.59500046	234.3170013	0.170771757	0.8340745719	0.9540626349	292	0.4067656303	0.4690842935
1	8101423	8102500	AT1G22885	1.120377898	+	161	160	67.87000275	15.68000031	158.0399933	54.01000023	14.64449964	179.4782494	0.1407220497	0.0757917792	0.3415917863	11527	0.05189253476	0.1983845325
1	8102727	8103588	AT1G22890	0.2405968327	+	277	141	58.22000122	11.09800024	183.4339981	53.68000031	13.48500013	199.2799988	0.07975522954	0.5746496775	0.83533684	19445	0.4716693243	0.4914293177
1	8104992	8108361	AT1G22910	2.169925562	+	63	98	86.52999878	15.67249994	159.0869995	64.18499947	12.95299997	192.0737511	0.2664399093	0.00676198866	0.0852432829	2428	0.01127728549	0.08737491713
1	8109573	8112061	AT1G22920	0.07526577842	-	63	91	94.48000336	24.09850016	174.7534996	85.83000183	20.41250038	168.4575043	0.0989010989	0.8408803843	0.9570664848	2699	0.2697095256	0.4056259683
1	8117285	8122151	AT1G22930	0.00651877176	+	95	81	92.63999939	16.28149996	235.2210045	81	10.52000046	192.3699951	0.06770630279	0.9851020623	0.9999976789	3726	0.3597385268	0.4503128164
1	8122338	8125068	AT1G22940	0.6969336865	+	35	51	87.11000061	24.39599953	189.4769989	89.25	28.37000036	193.4900017	0.2280112045	0.2009399609	0.544883435	774	0.1498038662	0.3214347793
1	8125022	8127286	AT1G22950	0.2939627935	-	48	44	95.71999741	18.5450006	180.7012482	87.25	13.67599971	174.6087433	0.1666666667	0.508202979	0.7924825984	946	0.196030208	0.3581374872
1	8127441	8130456	AT1G22960	0.03137233965	-	17	17	86.11000061	25.25	184.2180023	96.5	20.96799965	143.4660004	0.1764705882	0.9303099381	0.9890509959	141	0.4588502968	0.4867713254
1	8130597	8132435	AT1G22970	0.3111181142	-	55	62	79.13999939	15.34500022	174.9324989	74.54999924	11.35724986	200.297002	0.1507331378	0.4885194796	0.7812882693	1511	0.1453233229	0.3183299355
1	8135179	8136034	AT1G22985	2.506897521	-	23	16	68.63999939	22.17749987	150.4560005	32.78499985	11.84499991	105.6862516	0.5570652174	0.003112450688	0.04987813755	88	0.003198392347	0.03941060433
1	8139113	8140233	AT1G22990	0.09816608013	+	11	17	42.54000092	19.35000086	111.4199982	40.56000137	9.431999969	132.8220032	0.2352941176	0.7976895816	0.9381531773	83	0.3190332751	0.4324247338
1	8143226	8145174	AT1G23000	0.3859961929	+	21	16	82.23000336	21.00999928	147.640007	97.58499908	20.47375059	260.6112404	0.2797619048	0.4111533253	0.7276407626	137	0.1748844889	0.3419811713
1	8149867	8153796	AT1G23020	0.7307657143	-	89	42	105.4300003	27.36999931	250.4040009	121.5349998	42.20775146	286.7814919	0.1987693954	0.1858806942	0.5256373327	1566.5	0.06819971628	0.2280908597
1	8156503	8159185	AT1G23030	0.7808788503	+	36	61	101.7099991	19.19749999	157.8275051	86.31999969	16.89000034	150.8799973	0.2276867031	0.1656231917	0.4963573385	991	0.2132301338	0.3706613377
1	8164781	8166716	AT1G23040	0.4927977645	+	104	53	60.68499947	12.60924983	157.2340012	58.15999985	14.82900019	131.0930016	0.1574746009	0.3215157374	0.6620649242	2629	0.319331906	0.4325914533
1	8168442	8169267	AT1G23052	0.9236968568	-	146	70	62.22500038	17.93000007	145.2337494	64.54000092	15.06974969	145.7059959	0.1692759295	0.1192073801	0.4269786273	4925	0.3338986427	0.4386493829
1	8180188	8183650	AT1G23080	0.9176501219	-	429	411	87.44000244	15.33199987	200.8689957	78.40000153	13.67500019	219.7199974	0.08104061389	0.1208787271	0.4299981152	81051.5	0.02159325719	0.1267367568
1	8184924	8189234	AT1G23090	0.2914006306	-	30	21	66.81000137	19.61975064	176.2542503	59.59000015	13.75500011	163.9649963	0.2238095238	0.5112100338	0.794189594	274	0.2191318692	0.3754894675
1	8195775	8196475	AT1G23100	0.4075880165	+	35	37	60.5	17.81000037	117.3074966	41.72999954	12.56700039	156.7069977	0.2054054054	0.3912118339	0.7140856469	532	0.09754575954	0.2665688998
1	8198585	8199616	AT1G23120	1.446713964	+	26	11	48.02000046	15.50624967	111.9262486	98.93000031	45.7699995	140.3150024	0.4825174825	0.03575082233	0.2314646782	59	0.002763378747	0.03579831559
1	8200320	8201246	AT1G23130	0.0828692212	+	3282	1941	64.80500031	25.60125036	145.7857433	65.30000305	24.3550005	149.5400009	0.01789725607	0.8262867313	0.9503147364	3168087	0.3727448874	0.4559028576
1	8215720	8219641	AT1G23180	0.1377790058	+	30	46	103.2799988	16.69500003	230.647258	93.77000046	19.05750084	174.182497	0.1565217391	0.7281502353	0.9145924361	668	0.4096373719	0.4698276966
1	8219807	8224547	AT1G23190	0.4812066429	+	211	190	74.37999725	18.28249979	218.2000008	78.82500076	15.10550001	198.0642452	0.09356447992	0.3302123843	0.6687525437	19265.5	0.2507288012	0.3963827632
1	8233952	8235019	AT1G23205	0.610727894	-	30	23	38.47999954	11.91899973	178.127496	52.95999908	8.678000045	99.33400116	0.2724637681	0.2450598177	0.5925710281	292.5	0.1753547158	0.3423939809
1	8242368	8244403	AT1G23220	0.3636275475	+	76	93	54.43000031	11.94125032	133.9212513	61.56000137	10.71099977	193.9889969	0.1320033956	0.4328849156	0.7443648189	3143	0.1085888684	0.2793520712
1	8244417	8251937	AT1G23230	0.3829335357	+	25	25	129.4799957	34.9980011	214.9539948	99.58999634	14.83800049	199.8600006	0.24	0.4140630381	0.7311877364	254	0.1302171345	0.3038734382
1	8256853	8258725	AT1G23260	0.1411677428	-	124	140	67.80999756	11.08924997	208.188253	62.02499962	9.511999965	215.70625	0.08410138249	0.7224906935	0.9120330159	8166	0.2034555877	0.3638619295
1	8260607	8262795	AT1G23280	0.2700828244	-	83	84	81.55999756	9.733500147	190.7104965	73.06500244	17.1490005	185.2997528	0.1219162364	0.5369293886	0.8112047786	3482	0.4955308328	0.4991711591
1	8262924	8263739	AT1G23290	11.19643476	+	1101	1754	61.63999939	14.78999996	142.8899994	50.30000114	12.28650005	151.0460007	0.1392255615	6.361583564e-12	9.836767777e-10	813374	6.262584085e-13	8.752563431e-11
1	8268384	8272021	AT1G23310	3.116710563	-	5789	7322	64.72000122	14.42799959	211.348996	63.16499901	13.09050014	205.927993	0.03481234767	0.0007643450142	0.01741340875	20635215	0.004739396553	0.05020927762
1	8279553	8282421	AT1G23330	0.4592706758	-	23	39	87.48000336	12.91550028	163.215004	95.51999664	31.49200001	183.4205048	0.2363433668	0.3473196256	0.6819307068	368	0.1218530524	0.2956818225
1	8283643	8286969	AT1G23340	0.4587801159	-	23	35	97.83000183	20.04150038	192.9420013	80.95999908	9.803999901	237.4594978	0.2409937888	0.3477121642	0.6819307068	346	0.1866973466	0.3510258975
1	8295077	8296941	AT1G23360	0.2144669205	-	53	46	127.3099976	30.21400032	297.1939941	142.1100006	17.43999958	249.6774998	0.1488925349	0.6102855393	0.8554827191	1189	0.4180188046	0.4731137007
1	8297240	8302651	AT1G23380	0.02048770442	-	16	31	77.15999985	14.64500034	184.5049992	65	10.45749998	201.1474953	0.1512096774	0.9539207495	0.9959944037	235	0.3894958421	0.4625301896
1	8308964	8310916	AT1G23390	1.012246662	-	285	330	67.51999664	14.00799999	174.4019974	57.73500061	11.66349971	154.3469955	0.09840510367	0.09721948992	0.3862380825	42363.5	0.01694869043	0.1100264473
1	8311983	8315876	AT1G23400	0.3063174403	-	83	133	99.31999969	27.47600012	181.207505	92.43000031	12.52700005	203.5189972	0.1141407736	0.4939495109	0.7846024047	5016	0.1301236488	0.3038734382
1	8314852	8315737	AT1G23410	0.1569831013	+	19	26	68.11000061	20.52699924	135.7075039	60.40500069	19.86625004	178.9924984	0.2044534413	0.6966536208	0.900156492	198	0.1325269265	0.305964237
1	8321610	8324497	AT1G23440	0.7835610704	+	109	131	72.73999786	14.30500002	218.6700012	58.41999817	17.12749958	232.8074989	0.1423769172	0.1646034485	0.4949340348	6387	0.08011889021	0.2447001616
1	8326746	8329782	AT1G23460	0.3354935204	+	16	18	108	12.01000023	240.7812443	102.0299988	15.08800032	224.6384979	0.2777777778	0.4618558826	0.7634518568	129	0.3084327963	0.4266636039
1	8332861	8336414	AT1G23480	0.1369167896	+	40	53	80.11500168	11.87700033	245.1717575	65.04000092	20.13499985	224.075	0.1400943396	0.7295972871	0.9146331221	1059	0.4984521184	0.5
1	8336592	8338827	AT1G23490	3.388238632	+	838	961	80.13500214	21.02950082	196.500246	71.48000336	15.17000008	201	0.09683503908	0.0004090358445	0.01121887651	359960	5.11794652e-05	0.001645782139
1	8385187	8386522	AT1G23710	0.104638114	+	35	34	64.80999756	17.25	116.148497	70.36000061	16.58549981	147.0589943	0.1521008403	0.7858902232	0.9351682236	543	0.2682469211	0.404793293
1	8395465	8398387	AT1G23730	0.5582254692	+	22	25	50.81500053	15.84150016	228.0137459	68.27999878	9.620000076	164.5399933	0.2781818182	0.2765505527	0.6246561436	269	0.4533268547	0.4853547012
1	8398114	8399836	AT1G23740	1.446238304	-	868	746	62.29500008	12.58025024	150.7629955	57.80999947	11.58874977	173.0474968	0.07036915778	0.03578999978	0.2316151589	312561.5	0.1150753344	0.2870750945
1	8400055	8401550	AT1G23750	0.03803626159	+	34	44	55.7349987	17.05550001	117.6487469	54.89500046	10.72399993	133.8684998	0.1229946524	0.9161439931	0.9831921057	729	0.4260593027	0.4762430809
1	8406662	8408530	AT1G23780	0.0976822049	-	93	101	56.36999893	8.574000359	164.4050049	60.84000015	10.53000021	181.1999969	0.09102523156	0.7985788338	0.9384392953	4485	0.2945727008	0.4197660987
1	8412050	8414886	AT1G23800	0.1580015322	-	34	21	102.0050011	17.76100025	320.5605057	85	20.84999943	185.1200027	0.1890756303	0.6950218656	0.9001269258	304	0.1815408618	0.3473340037
1	8420264	8422985	AT1G23820	0.5814744982	+	291	255	66.23000336	14.2099998	186.9225006	62.84000015	10.76950006	200.6669945	0.08546593895	0.262135296	0.6106966706	35062.5	0.1337301418	0.3070722924
1	8422959	8424088	AT1G23830	0.2895252514	-	13	12	63.02999878	41.06400032	152.6220047	79.22499847	50.03975058	279.885997	0.3076923077	0.5134223245	0.7953916527	59	0.1571434928	0.3282668392
1	8427256	8429498	AT1G23860	1.236231732	-	155	164	65.20999908	13.70749989	202.0114998	61.20499992	11.54725025	192.0970005	0.1468528718	0.05804546149	0.2990750736	11436	0.06095877811	0.2157764949
1	8432178	8435656	AT1G23870	0.3996827501	+	92	89	80.77499771	13.0127501	157.6447468	81.37000275	11.1619997	200.7220001	0.1305569126	0.3983980921	0.7193873589	4039	0.4385468268	0.480786449
1	8438765	8440866	AT1G23890	0.05894493437	-	15	32	72.63999939	16.2525002	259.9649933	70.25500107	8.819999945	170.6452541	0.1770833333	0.8730820623	0.9695876022	227	0.387717818	0.462435808
1	8441072	8447681	AT1G23900	1.163732842	+	65	76	109.1500015	25.54199982	262.2179901	88.30500031	13.99000001	264.2162399	0.2143724696	0.06859100368	0.3260203527	1903	0.009563161052	0.07936645045
1	8469532	8471417	AT1G23950	0.2610275075	-	76	90	85.14500046	23.06124973	208.8137531	80.39500046	18.87725058	184.6270004	0.1216374269	0.5482422391	0.8184911579	3084.5	0.1387839694	0.3116658123
1	8478390	8480356	AT1G23960	0.679947366	-	126	178	75.63000107	18.12750077	226.6475067	65.56500244	17.1440001	179.0715012	0.1218120207	0.2089549357	0.5532918334	10232	0.09680427383	0.2657854479
1	8481996	8483875	AT1G23970	1.006583285	-	40	32	76.03499985	14.02849996	135.3485046	81.71500015	8.94224968	203.8985062	0.28125	0.09849557388	0.3886083513	585	0.2684132292	0.4049601709
1	8500118	8502065	AT1G24020	0.1465077336	-	172	164	60.35499954	12.76049967	137.7690041	57.18000031	11.67575009	143.4242443	0.07515598412	0.7136614967	0.9081046618	13337.5	0.1947198073	0.3570329549
1	8503776	8506813	AT1G24040	1.467912786	-	44	58	95.81000137	12.43400021	254.4487556	78.31499863	11.0287498	183.7482502	0.2774294671	0.03404765562	0.2269063157	964	0.01765855623	0.1127553978
1	8506967	8508909	AT1G24050	0.405687941	+	185	202	73	14.36400013	186.2260071	79.75	13.73875027	210.9150066	0.09036660423	0.3929271688	0.714524759	17320.5	0.1073261802	0.2779113699
1	8525333	8527087	AT1G24100	0.02640785652	-	86	60	56.81499863	13.67500031	152.4937553	57.24500084	12.23575034	152.5909954	0.08720930233	0.9410054603	0.9922832292	2478.5	0.3439431989	0.4430749266
1	8529063	8532262	AT1G24120	0.3795611907	-	31	39	94.68000031	36.4975009	167.1300049	81.95999908	12.86350007	217.5829948	0.2051282051	0.4172907994	0.7342394725	539	0.2210857513	0.3764181089
1	8540837	8542053	AT1G24145	0.345951373	+	79	31	71.95999908	19.53499908	145.0785042	60.79000092	18.62749958	136.402504	0.1768068599	0.4508671844	0.7564499716	1144	0.2975262434	0.4210878755
1	8542211	8543545	AT1G24147	0.414928603	+	113	44	50.15000153	9.551999664	171.8539948	41.10499954	10.79000041	134.4912518	0.157079646	0.3846550132	0.709456153	2173.5	0.1113428659	0.2826350953
1	8544247	8545590	AT1G24148	0.8004095769	+	135	187	68.08000183	13.14499979	176.2384995	61.81000137	14.17199984	177.9609978	0.1252921371	0.1583399207	0.4857549449	11820.5	0.1654478168	0.3349281361
1	8553312	8556750	AT1G24160	0.4343383551	-	110	114	86.16999817	14.79549985	194.9939949	85.95499802	11.84150007	224.9027473	0.1205741627	0.3678422792	0.6963515927	6078.5	0.3468280332	0.4440872784
1	8557214	8559066	AT1G24170	1.551233198	-	63	70	61.54000092	17.11750011	134.0854942	41.43500137	13.63224957	116.71325	0.2476190476	0.02810391362	0.2043473659	1594	0.00296978221	0.03756813265
1	8560419	8563502	AT1G24180	2.687415214	-	102	102	73.24000168	19.6557498	161.4299927	59.19999886	15.7504998	160.4962524	0.2549019608	0.002053925968	0.03623035673	4173	0.007351805988	0.0672488987
1	8563509	8570580	AT1G24190	0.1195796001	-	51	48	87.45999908	33.23999977	229.5074997	103.9249992	19.76750021	247.5410065	0.131127451	0.7593122386	0.9257342215	1137	0.2723831818	0.4068533088
1	8586334	8588180	AT1G24240	0.117304058	+	37	34	76.19000244	14.32099962	184.6710007	61.83499908	27.8244998	172.7724976	0.153418124	0.7633011945	0.9273305636	574	0.2652288078	0.4033765876
1	8593535	8596123	AT1G24260	0.00494780558	-	26	12	97.24500275	12.23250008	180.9512444	88.79499817	28.72600002	163.053503	0.1474358974	0.9886719082	0.9999976789	143	0.347327255	0.4442842252
1	8604021	8607484	AT1G24267	1.184587869	-	88	88	115.7649994	20.32525039	208.1029984	90.06999969	12.92525036	231.3654934	0.1931818182	0.06537506455	0.31844125	3402	0.08238967647	0.2476622374
1	8612504	8614277	AT1G24290	0.1612242149	-	16	17	71.65999985	37.58874989	160.0250034	78.44000244	13.70999985	135.3079956	0.2352941176	0.689883543	0.8976411724	126	0.3660971352	0.4528432137
1	8614362	8620664	AT1G24300	0.6898778427	-	28	29	98.78499985	34.17924871	209.6322533	118.4300003	57.13800087	185.4350021	0.2721674877	0.204231232	0.5488753723	283	0.02526631132	0.1363498565
1	8624013	8626405	AT1G24310	0.7221844213	+	63	44	93.79000092	24.375	213.3259972	75.95999908	14.51799958	200.9562542	0.2074314574	0.1895900664	0.5314737928	1110	0.0405595018	0.1751201777
1	8635186	8638986	AT1G24340	0.7250197653	+	24	56	104.2599983	26.94425068	281.3369934	67.91500092	17.21250081	222.1812515	0.255952381	0.1883563364	0.5290356231	497	0.0334699157	0.1580010473
1	8638519	8640825	AT1G24350	0.6824834738	-	42	71	86.56499863	30.53875046	214.3062428	63.65000153	10.55250025	219.2024994	0.2015425889	0.2077382775	0.5522833855	1225	0.05734880667	0.2101247555
1	8640581	8643503	AT1G24360	0.4920999823	+	263	404	79.11000061	15.00149965	200.0689995	71.20000076	14.10474992	192.3432552	0.07485976735	0.322032733	0.6621510502	49914.5	0.09336664358	0.2619722729
1	8651406	8653915	AT1G24400	0.19490764	-	19	12	97.76999664	39.44699879	189.9804985	79.78000259	12.31949995	191.5660034	0.2587719298	0.638399238	0.869646947	84	0.1157735699	0.2882440627
1	8661837	8664007	AT1G24440	0.2784997132	+	47	51	85.95999908	19.5659996	227.2999992	93.05999756	13.0849998	165.9399986	0.159365874	0.5266235626	0.8051135022	1119	0.2871330367	0.4161825577
1	8664096	8665569	AT1G24450	0.2053899453	+	59	69	67.72000122	13.34600005	152.7055008	58.41999817	11.19999981	176.7019958	0.1301891427	0.6231750464	0.8625701646	2007	0.4467624377	0.4837947404
1	8665873	8672651	AT1G24460	0.4746439134	+	46	47	87.75	19.09500003	164.5575047	84.93000031	13.24049964	225.3529968	0.1901017576	0.3352401966	0.671450497	1059	0.4343892006	0.4793999434
1	8682194	8685271	AT1G24490	0.4634279649	+	83	81	96.30999756	16.82600021	192.3440041	88.58000183	14.46000004	201.9199982	0.1432396252	0.3440107667	0.6802061529	2990	0.1111892177	0.2823436897
1	8685270	8688247	AT1G24510	1.372616151	-	318	403	72.23500061	12.65774987	191.0297562	62.90000153	10.76050024	182.9480026	0.1031259266	0.04240175665	0.2512412447	57431	0.008350476597	0.07276629337
1	8693226	8694705	AT1G24530	0.8157164651	+	78	35	78.30500031	13.5202503	146.69175	60.34999847	9.345999694	166.8304939	0.2241758242	0.1528563676	0.4784167318	1087	0.04243185746	0.1787865127
1	8702360	8705879	AT1G24560	0.2952774695	+	40	47	80.32500076	20.81150007	160.5824951	92.73999786	18.60200014	225.7234947	0.1718085106	0.5066668969	0.7911057413	875	0.2913909076	0.4182906359
1	8710846	8711578	AT1G24575	0.4023532149	-	35	16	54.06999969	14.89250007	133.9299957	42.81999969	18.38874984	113.0825014	0.2589285714	0.3959558695	0.7170718369	254	0.3023517023	0.4232880652
1	8712477	8713225	AT1G24577	0.5138039833	-	25	23	59.61999893	23.95200005	121.5940033	48.04000092	10.13550019	101.5975002	0.267826087	0.3063345748	0.6522154621	244	0.1874275624	0.3513820189
1	8720650	8722825	AT1G24610	0.3087750585	-	39	85	83.83000183	10.84149997	192.080999	78.26999664	18.26799965	213.0970001	0.1568627451	0.4911622063	0.7827039434	1526	0.2404165357	0.3895902991
1	8725788	8727212	AT1G24625	0.9031180946	-	76	53	92.17499924	23.84999967	204.3875065	72.79000092	9.055000019	192.8380035	0.2055610725	0.1249919103	0.4363010124	1595.5	0.02269519792	0.1293977878
1	8741835	8755604	AT1G24706	0.05472576926	+	24	31	106.7150002	26.05674891	214.3042477	118.4599991	20.59500027	195.6249962	0.1532258065	0.8816053778	0.9728032858	349	0.3512863586	0.4467145427
1	8759532	8763469	AT1G24764	0.804042649	-	38	40	92.47499847	11.24775031	231.5355057	72.75999832	9.565000367	154.92925	0.2473684211	0.1570208598	0.4836382427	621	0.08309680415	0.2485143367
1	8767561	8769571	AT1G24793	0.7626707727	+	107	90	141.5399933	34.61150007	292.6750046	159.1199951	19.65150018	329.597506	0.1552440291	0.1727146701	0.5068441865	4491	0.2085227695	0.3676544122
1	8769510	8771553	AT1G24800	1.507578255	+	448	411	62.47500038	14.82924981	151.2655006	58.27000046	12.98500013	161.3625031	0.09770920229	0.03107575903	0.2151911184	85149.5	0.02849965588	0.1447514301
1	8775900	8778072	AT1G24880	0.2474569732	+	1116	1139	188.4799957	21.08375025	356.9312553	189.8500061	18.99600029	344.3965027	0.03296924612	0.5656437943	0.8291279296	631337.5	0.3923327319	0.4635922327
1	8784035	8785634	AT1G24881	1.464955037	+	455	418	62.38000107	14.68149967	153.0869987	58.26000023	12.82625027	161.2522522	0.0957779063	0.03428032758	0.2272068223	88095.5	0.03001886659	0.1486174295
1	8804488	8806361	AT1G25054	0.7193391866	+	111	92	147.4799957	35.9625001	318.3574905	159.25	19.73850017	328.9925056	0.1499216608	0.1908362234	0.5331297445	4803	0.2339147479	0.3861509636
1	8806606	8808156	AT1G25055	1.464955037	+	455	418	62.38000107	14.68149967	153.0869987	58.26000023	12.82625027	161.2522522	0.0957779063	0.03428032758	0.2272068223	88095.5	0.03001886659	0.1486174295
1	8812694	8815264	AT1G25098	1.070980175	+	1084	1122	186.0750046	26.4437499	355.8030144	191.0350037	23.71624908	350.8679932	0.05324243082	0.08492192401	0.3624016927	588938	0.09978492011	0.2687868447
1	8818866	8820736	AT1G25145	0.7193391866	+	111	92	147.4799957	35.9625001	318.3574905	159.25	19.73850017	328.9925056	0.1499216608	0.1908362234	0.5331297445	4803	0.2339147479	0.3861509636
1	8821007	8822843	AT1G25150	1.471321735	+	453	416	62.38000107	14.67699966	153.1659988	58.26000023	12.81375027	161.2837524	0.09616976566	0.0337814483	0.2256495179	87029.5	0.0258104477	0.1381346433
1	8826982	8829682	AT1G25175	1.194142789	+	779	827	179.2899933	25.39249964	346.2525085	189.3999939	23.64349957	345.1904953	0.06509911787	0.06395245361	0.3150917091	311047	0.1166880097	0.2896277699
1	8833244	8835235	AT1G25210	0.7193391866	+	111	92	147.4799957	35.9625001	318.3574905	159.25	19.73850017	328.9925056	0.1499216608	0.1908362234	0.5331297445	4803	0.2339147479	0.3861509636
1	8835385	8837007	AT1G25211	1.377837058	+	455	418	62.38000107	14.68149967	153.0869987	58.26000023	12.82625027	161.2522522	0.09338556181	0.04189507207	0.25029491	88045.5	0.02911578489	0.1462328726
1	8836834	8839609	AT1G25220	0.210718303	-	158	60	75.93999863	14.44600015	218.5407558	88.99499893	19.98875012	195.9757515	0.1124472574	0.6155760252	0.8586096742	4411.5	0.2151826189	0.3722698258
1	8840202	8842445	AT1G25230	3.747557021	-	110	143	63.50500107	13.71424973	199.7444958	31.21999931	7.458499932	200.2749977	0.2692307692	0.0001788310717	0.005828048491	5991	0.0005834334775	0.01174764499
1	8853533	8855874	AT1G25260	0.6118544121	-	221	270	66.83999634	11.17000008	207.1550064	61.90499878	13.6107502	194.7307564	0.09187196246	0.2444249798	0.5920189832	27636.5	0.07997143873	0.244609609
1	8860526	8861522	AT1G25275	0.5898048791	+	757	558	65.58999634	14.47599955	169.223999	64.34000206	10.9087501	173.4949982	0.05608111627	0.2571550876	0.6055156694	205560.5	0.2035650307	0.3638912897
1	8861733	8862797	AT1G25277	0.6533840366	+	12	11	79.36499786	39.50349884	124.2282484	54.24000168	19.98999977	97.41000175	0.4090909091	0.2221344738	0.5674260566	32	0.01961422519	0.1210071151
1	8863767	8866894	AT1G25280	0.4835042453	+	75	79	71.19000244	17.01100082	197.7109955	70.11000061	13.88150005	180.8869957	0.1497046414	0.3284700335	0.6676425586	2743	0.2142867233	0.3715001817
1	8867023	8869289	AT1G25290	0.9776113759	+	43	39	89.62000275	13.42799997	245.0485062	82.79000092	15.24100003	220.7305054	0.2599880739	0.1052903633	0.4009419518	696	0.09367158738	0.2619722729
1	8877789	8880388	AT1G25320	1.351511899	+	13	14	67.5	47.52799988	129.1090019	48.25	14.14150026	117.602001	0.5	0.04451312668	0.2583859011	44	0.01200994832	0.09064444296
1	8889017	8894306	AT1G25350	3.259412799	-	88	104	125.6900024	19.66100049	229.3732437	74.66500092	10.58099999	212.1995033	0.2875874126	0.0005502843995	0.01376658132	3154	0.0001056498456	0.002930573485
1	8900109	8903428	AT1G25375	0.07450135557	-	20	13	96.15000153	22.69274955	173.138002	94.84999847	17.73999949	180.1740005	0.2076923077	0.8423617622	0.9574170029	123	0.4053648636	0.4686215137
1	8903404	8906455	AT1G25380	2.175329346	+	41	51	111.9599991	22.39999962	221.6199951	79.23999786	9.419999838	187.5424995	0.343854615	0.006678372737	0.08466436107	715	0.004766762601	0.05038901411
1	8906028	8909334	AT1G25390	0.3714747851	-	33	15	85.15000153	17.99599972	197.5160004	75	9.177500033	122.3055	0.2606060606	0.4251333891	0.7391972884	195	0.1237123925	0.2974623037
1	8915914	8918267	AT1G25420	0.6643718104	+	76	93	108.7700005	18.54749966	206.1574936	82.90000153	13.74100037	243.510997	0.1595925297	0.2165849073	0.5621865049	3225	0.1647977002	0.3341705598
1	8922415	8923879	AT1G25425	0.1280685869	+	50	41	61.31999969	9.243749928	148.1514999	69.08000183	14.36999989	170.8699951	0.1390243902	0.7446143698	0.9199294403	1001	0.4256535399	0.4761540199
1	8933715	8935544	AT1G25440	0.3000053305	-	316	278	78.27999878	9.684999585	190.7637482	76.33000183	9.717749977	186.8547535	0.06727529369	0.5011810821	0.7884556427	42507.5	0.2487374303	0.3945812604
1	8938386	8940613	AT1G25450	1.570348642	-	49	66	71.40000153	13.42399998	172.3900055	50.39999962	9.704999685	187	0.2696351268	0.02689374964	0.1993374049	1345.5	0.06267251634	0.2185853198
1	8944608	8946628	AT1G25470	0.46102305	-	49	49	77.93000031	24.23400002	190.6859985	92	25.86399994	165.0420013	0.1836734694	0.3459210177	0.681572725	1115	0.2729408068	0.4072318985
1	8948231	8951031	AT1G25480	0.3354935204	+	16	18	133.0300064	32.80125046	175.8262501	125.3250008	16.21524947	254.0394939	0.2777777778	0.4618558826	0.7634518568	134	0.3715385739	0.4553353739
1	8951161	8955160	AT1G25490	1.248970175	+	221	226	82.33000183	15.59000015	234.6299973	70.57999802	13.41875029	228.7387466	0.1248348216	0.05636763645	0.2949257004	22482.5	0.03411543709	0.1593917962
1	8955194	8958132	AT1G25500	0.604455354	-	13	11	102.1900024	59.46399803	138.1619965	129.2299957	45.8275013	220.2175064	0.3916083916	0.248624914	0.5957441411	49	0.1012247186	0.2706090278
1	8959086	8961183	AT1G25510	0.1819740938	-	15	12	42.36999893	17.68749981	86.34099998	54.03000069	17.15475025	123.6269955	0.2666666667	0.6576970686	0.8781359895	70	0.170674657	0.3382080626
1	8962086	8964564	AT1G25520	2.025801019	+	47	75	122.9300003	14.61600032	220.5750015	75.34999847	14.56350007	201.7634987	0.2967375887	0.009423212424	0.105607556	1219	0.002140630477	0.03000391898
1	8964543	8967562	AT1G25530	0.6654781303	-	21	19	59.06999969	24.59500027	219.7649994	77.72000122	27.58849945	224.2335052	0.3182957393	0.216033882	0.5617837855	157	0.1276591186	0.3009773381
1	8969064	8974815	AT1G25540	1.560947179	-	38	37	102.3149986	40.03124838	215.3129986	66	10.35700006	202.2119934	0.3271692745	0.02748228385	0.2020510853	518	0.02527988372	0.1363498565
1	8976325	8978305	AT1G25550	0.630317453	+	229	216	100	14.58900023	220.5319992	93.44499969	12.13625002	200.5549984	0.09697962154	0.2342515898	0.5814287667	22867.5	0.08460407442	0.2508609183
1	8981555	8983314	AT1G25560	0.3778810869	-	407	242	70.91999817	14.54400043	160.2479988	70.00999832	12.62074988	143.3339993	0.07080634353	0.4189082497	0.7344893646	48091.5	0.308520864	0.4266636039
1	8991707	8995617	AT1G25570	0.3797701155	-	50	56	113.75	12.95475025	219.9375023	94.79999924	20.49499965	206.7699986	0.1671428571	0.4170901028	0.7341250478	1253	0.1769202618	0.3438342031
1	8996713	8999917	AT1G25580	0.05155801518	-	17	20	47.25999832	13.88800011	110.7660004	51.20499992	9.419749928	134.7590012	0.1823529412	0.8880593371	0.9749516676	161	0.3977995519	0.4655145512
1	9002284	9004762	AT1G25682	0.4338559678	-	84	77	67.93000031	15.79649975	135.4412567	74.33999634	8.384999657	171.3490005	0.1417748918	0.3682510825	0.6966718059	3120.5	0.3510793105	0.446529382
1	9022541	9024081	AT1G26100	0.1263012917	-	24	16	95.31000137	28.68075023	173.9639935	80.96999741	18.02499962	131.3687534	0.2083333333	0.747650638	0.9207847842	160	0.1922463257	0.3551370076
1	9024340	9027955	AT1G26110	1.108285196	-	348	331	79.10499954	16.86549997	218.8170036	70.87000275	12.76250029	180.1724968	0.0968416849	0.07793181743	0.3463937654	52420	0.02143558369	0.1261401655
1	9028375	9032327	AT1G26120	0.2435854185	-	30	51	104.3050003	20.88875017	213.9710072	107.4000015	11.08250046	249.5449982	0.1745098039	0.5707088162	0.8331076272	711.5	0.3021098774	0.4232109582
1	9033015	9039099	AT1G26130	0.8631826557	+	17	15	122.2099991	23.97400074	225.3519897	99.55999756	24.06100035	170.316497	0.3882352941	0.1370305322	0.4552193867	89	0.07564578108	0.2390242235
1	9039627	9043855	AT1G26150	0.6618559723	-	55	62	145.7899933	49.65999908	271.7125061	157.7249985	47.00750027	274.5387383	0.1900293255	0.2178432099	0.5639301737	1568.5	0.2288323236	0.3820443169
1	9044421	9047049	AT1G26160	0.5341308289	-	61	80	89.76999664	21.76500034	198.3000031	79.11500168	19.28524923	227.8692474	0.162704918	0.2923271625	0.6406778207	2200	0.1594672965	0.3304615275
1	9047291	9054703	AT1G26170	0.7608342148	-	44	29	115.5200005	23.60599928	320.5010033	85.41999817	21.51599922	279.1800018	0.2554858934	0.1734465977	0.5077636047	537	0.1286150269	0.3020620535
1	9054672	9056941	AT1G26180	0.328807157	+	73	65	92.40000153	17.40599976	234.6720032	79.69999695	19.7840004	218.8359955	0.1412012645	0.469021599	0.7687448062	2150	0.1718371064	0.3392627468
1	9057094	9061140	AT1G26190	0.3025498625	-	22	15	103.8600006	13.21875	190.921748	97.33000183	11.91499987	262.240007	0.2636363636	0.4982532469	0.7868438661	155.5	0.3903426033	0.4627349655
1	9065954	9071468	AT1G26208	0.007767297615	-	22	19	195.7200012	77.24449902	304.875251	193.7899933	68.33599949	327.2304993	0.1387559809	0.9822741213	0.9999976789	202	0.4325293417	0.4785270388
1	9067038	9068207	AT1G26210	0.1952398574	+	57	76	65.88999939	12.14400005	133.1740051	62.71000099	13.22999978	126.4112501	0.1271929825	0.6379110757	0.8695816751	2143.5	0.4601614459	0.4869637143
1	9071057	9072273	AT1G26218	0.283639343	-	24	26	47.27499962	9.601249838	133.2632496	66.51499939	8.944999933	165.0812569	0.2211538462	0.5204280032	0.799060323	264	0.1781668757	0.3447817252
1	9071139	9071861	AT1G26220	0.7345632462	+	82	87	52.99500084	12.70649986	138.449003	43.47999954	11.98650012	152.7215038	0.1645640594	0.1842624129	0.5242227776	3223	0.1399587692	0.3127494353
1	9072255	9075350	AT1G26230	0.1277760632	-	39	40	103.7799988	27.38499937	191.8650002	107.2099991	19.40349994	294.5897522	0.1480769231	0.7451160818	0.9200800483	703	0.2265839256	0.3803408427
1	9089468	9092560	AT1G26270	0.04777259424	-	80	82	62.06500053	12.50399971	116.3839998	59.68000031	16.23899956	132.4222458	0.08841463415	0.8958337202	0.9775667933	3194.5	0.387917663	0.462435808
1	9095767	9099766	AT1G26300	0.02074532984	-	44	47	72.46500015	21.4624999	244.0067562	77.73000336	14.72849965	167.1415062	0.1049323017	0.9533550473	0.9959944037	1019	0.4541604348	0.4853547012
1	9113863	9114977	AT1G26340	0.04450069847	+	27	54	84.08000183	16.52449946	154.8545036	88.04000092	19.56774936	181.0402565	0.1296296296	0.9026082558	0.9790091846	663	0.2558428599	0.3996467872
1	9121442	9125578	AT1G26370	0.2234095919	-	37	30	93.09999847	17.25299988	172.4649994	75.48500061	13.19800005	196.6225002	0.181981982	0.597847487	0.8482772688	479	0.1705545979	0.3382080626
1	9143936	9146106	AT1G26440	0.4105430307	-	35	20	163.2799988	35.43500023	316.3075027	146.1350021	20.31700068	232.7005001	0.2428571429	0.3885589969	0.7120657351	276	0.0992246518	0.2683219189
1	9148635	9150250	AT1G26450	0.0594210652	-	39	29	108.1699982	20.23000045	197.5204933	94.43000031	22.7989996	253.6780029	0.1405835544	0.8721253992	0.9691393485	548	0.4165191902	0.4725511075
1	9151627	9154762	AT1G26460	0.1950929912	+	67	64	69.83000183	18.90800037	175.2320007	81.28499985	16.01625009	199.493998	0.1268656716	0.6381268357	0.8695816751	2018.5	0.2824579888	0.413004725
1	9155090	9156370	AT1G26470	1.008834961	+	83	103	88.27999878	17.23950005	216.1515038	70.75	12.29649987	173.0559998	0.1775646274	0.09798622777	0.3878205392	3396	0.008075014901	0.07139315181
1	9163210	9165900	AT1G26520	0.6799616453	-	23	18	123.8499985	24.72399926	215.4829987	88.34000015	16.56374998	272.5105019	0.3188405797	0.2089480655	0.5532918334	175	0.2039723494	0.3643244849
1	9171117	9173033	AT1G26550	0.1227010243	+	240	302	58.39999962	12.63075035	160.1952572	57.09000015	14.09125004	154.847995	0.05764348786	0.753874365	0.9233255357	36082.5	0.4654579844	0.4892913722
1	9178211	9181967	AT1G26560	2.417747931	+	54	66	89.63999939	21.52949924	213.9594963	69.37000084	12.64999986	218.9962521	0.3164983165	0.003821660193	0.05763918915	1407	0.02410471733	0.1329647311
1	9182007	9184393	AT1G26570	0.486890056	+	23	19	47.74000168	12.40849967	91.08999939	50.11000061	13.87800012	137.2875027	0.2814645309	0.3259191988	0.664880504	203	0.3523219858	0.4469733354
1	9184566	9187578	AT1G26580	1.402215305	+	94	140	142.7249985	36.27749953	275.4675095	125.7750015	19.21250024	358.7994965	0.1834346505	0.03960816247	0.2418927065	5874.5	0.08245736182	0.2477300029
1	9195511	9199671	AT1G26620	0.1120697564	-	20	25	67.02000046	8.29174999	115.5302481	80.93000031	17.54000015	129.8699982	0.19	0.7725564871	0.9306405221	209.5	0.1804387024	0.3467314304
1	9205799	9207417	AT1G26630	22.40474551	+	2238	3619	64.97999954	14.87775013	168.0877472	50.93000031	11.96450014	170.5920013	0.1370378903	3.937807559e-23	1.907867762e-20	3389504	4.375529875e-26	1.987447711e-23
1	9207382	9209902	AT1G26640	0.05294674585	-	54	61	105.2800026	20.56525049	287.2177555	107.1399994	14.86999989	277.4349976	0.1062537948	0.8852241513	0.9741548819	1629	0.4609382018	0.4871654739
1	9210050	9211588	AT1G26650	0.5867307532	+	75	92	67.37000275	24.23899918	162.6755051	75.73999786	19.17299967	178.1255032	0.1539130435	0.2589818011	0.607341155	3182	0.1947106974	0.3570329549
1	9211598	9214004	AT1G26660	0.2062769073	+	18	14	99.47000122	21.48524957	219.1822483	81.03000259	9.384750175	194.0652466	0.253968254	0.6219036314	0.8620417015	112	0.3040377117	0.4241839602
1	9214071	9215557	AT1G26665	0.2984127376	+	89	49	67.04000092	20.89799957	202.2119995	75.04000092	22.80999985	197.9799957	0.1433157533	0.5030223275	0.7895156872	1961.5	0.1654827701	0.3349522439
1	9215769	9218010	AT1G26670	0.8564263484	+	289	282	50.40999985	12.95599995	193.7699951	61.88500023	10.94875007	212.766748	0.09558516773	0.1391789807	0.4593475216	39357.5	0.2401740871	0.3895297035
1	9224058	9225792	AT1G26690	0.0002494328885	-	43	47	70.25	16.79499998	206.3085068	70	13.39350014	167.7629997	0.07422068283	0.9994258245	0.9999976789	1002	0.4742375935	0.4925456957
1	9244980	9246652	AT1G26740	1.184709857	-	44	72	74.52999878	24.15150084	153.839246	45.94499969	13.2257499	134.0227482	0.2436868687	0.06535670407	0.31844125	1145.5	0.006347932138	0.06127496015
1	9246856	9248274	AT1G26750	0.2996308711	+	46	70	59.30999947	13.47875035	156.0762463	60.44999886	9.336500025	225.4682446	0.1527950311	0.5016133991	0.7886101174	1552	0.3727730489	0.4559028576
1	9250040	9251659	AT1G26761	0.05701335358	-	50	84	63	21.05249991	156.5945042	58.58499908	13.85650001	122.9749979	0.1028571429	0.8769738558	0.9713764666	2009	0.3385807764	0.4410375744
1	9259431	9261313	AT1G26770	0.01116403626	+	125	104	86.12000275	19.16399994	188.7579971	86.02499771	24.13299985	180.6707523	0.06276923077	0.9746214464	0.9999976789	6489.5	0.4920083535	0.4984207847
1	9285024	9286395	AT1G26800	0.2145794244	-	45	45	67.54000092	14.77799988	152.2529938	58.04000092	9.274999714	100.5299973	0.1555555556	0.6101274654	0.8553436256	853	0.09973160996	0.2687428533
1	9292445	9293862	AT1G26820	0.1126502686	-	32	15	90.51000214	21.71500039	192.2780025	66.12999725	29.08450003	190.0249947	0.1979166667	0.7715245171	0.9304343231	202	0.1960496446	0.3581374872
1	9295564	9298629	AT1G26830	1.576894433	+	129	112	71.30999756	17.04199982	184.9780029	50.97999954	11.89500012	157.1340031	0.1866694352	0.02649144005	0.1978924812	5790.5	0.003968209237	0.04496604219
1	9300805	9304328	AT1G26850	0.6576260514	-	402	511	78.17499924	13.04174995	183.8470058	72.68000031	14.56999993	192.4975014	0.06942781202	0.2199753152	0.566151894	97101	0.07807534829	0.2420712807
1	9315304	9318277	AT1G26880	5.568492844	-	448	618	66.66500092	12.47450011	172.1512531	49.03499985	11.27125008	167.4307526	0.1600424757	2.70089161e-06	0.0001515732029	117960	1.845965656e-05	0.0007117005519
1	9321649	9323028	AT1G26910	0.218438418	+	35	82	74.26000214	21.45900064	145.7635002	64.59000015	14.33099997	216.7455048	0.149825784	0.6047300947	0.8522844674	1265	0.1564944441	0.3277775108
1	9329492	9330612	AT1G26920	0.5991725306	+	146	173	64.46500015	18.93625021	186.0487442	71.80999756	16.12700024	138.6330017	0.1126771716	0.2516676938	0.5996704802	12056.5	0.2429116788	0.3911402471
1	9336056	9337938	AT1G26930	0.09664583235	-	47	32	68.72000122	12.96800017	164.1924942	58.23999977	10.43299961	162.4499996	0.1429521277	0.8004867868	0.9392425505	742	0.4622076185	0.4876733258
1	9343111	9345323	AT1G26940	0.006190558079	+	50	35	63.8049984	12.81499979	165.6940048	67.26999664	14.90450006	154.777494	0.09714285714	0.9858468246	0.9999976789	837	0.3688681499	0.4541512761
1	9351159	9352833	AT1G26945	2.253307852	+	549	498	63.04999924	12.93100014	152.6469986	52.05500031	11.83349988	156.9207493	0.1052954989	0.005580744601	0.07566802498	122732.5	0.002128013672	0.02988471374
1	9373884	9376828	AT1G27000	0.4283127949	+	119	188	74.63999939	15.06100035	181.7759995	69.22999954	14.31750004	192.2197449	0.1054890041	0.3729814261	0.7012398174	10302.5	0.1219563427	0.2957653292
1	9381526	9384060	AT1G27030	0.6569461969	+	60	38	55.59000015	13.7869997	209.90825	49.22500038	15.83500025	241.0772545	0.2114035088	0.2203199392	0.5664262977	1075	0.3190740858	0.4324247338
1	9393652	9394716	AT1G27050	2.461463549	+	81	63	77.95999908	16.14999962	151.6999969	52.52000046	14.65949998	140.2559967	0.2927689594	0.003455703324	0.05332128218	1712.5	0.0003667546639	0.008264773704
1	9394906	9396673	AT1G27060	1.140388597	+	14	12	70.23999786	10.39600005	154.459499	108.6299973	38.30874853	170.9005062	0.4761904762	0.07237880415	0.3348557418	46	0.02687835249	0.1407337368
1	9396657	9399500	AT1G27070	0.06278140563	-	28	29	104.5649986	16.42150004	195.9664967	109.5299988	31.12499905	265.2899948	0.1527093596	0.8654033945	0.9658045408	386	0.3777987871	0.4581815078
1	9403752	9406369	AT1G27090	3.113547058	-	242	373	65.48999786	19.33925047	170.8740002	57.25	13.48999968	200.4	0.1619325106	0.0007699330138	0.01751326503	38409.5	0.0008944461881	0.0160900685
1	9407084	9411368	AT1G27100	0.7166103917	-	149	152	63	13.56400003	169.5360016	59.36499977	7.834500051	195.4994972	0.1228806076	0.1920390763	0.534698608	10456.5	0.1254027011	0.2992985649
1	9421008	9424084	AT1G27120	1.454340053	+	14	35	112.4150009	27.81574941	185.0919987	84.97000122	15.14500036	149.0164993	0.4285714286	0.0351285276	0.2294800668	155	0.02380658016	0.1321728964
1	9425279	9426897	AT1G27130	0.2272558831	+	183	242	53.59000015	12.28949966	160.6955025	56.35500145	12.16724963	151.0694965	0.07453822879	0.5925760803	0.8453325476	21827.5	0.4008199823	0.4668577965
1	9429007	9432310	AT1G27150	0.5077445016	+	74	60	88.84500122	12.57025003	230.1864971	69.91999817	14.44824991	221.7377495	0.1635135135	0.3106386559	0.655507094	1979	0.1409436024	0.3141099532
1	9446596	9449046	AT1G27190	0.8503491325	-	142	192	68.15000153	17.10500011	161.9120045	58.10000038	13.77075026	158.0287502	0.1255868545	0.1411402452	0.4624602037	12016.5	0.03207261263	0.1542150795
1	9449337	9451768	AT1G27200	0.4385540186	-	39	43	68.76999664	21.61850057	130.3360062	75.04000092	18.11049995	156.2744942	0.1973762671	0.3642889361	0.6928311482	743	0.1888651046	0.352530409
1	9455276	9458176	AT1G27210	0.4889453644	-	112	79	90.31499863	18.66775055	183.4327499	100.5199966	16.81699972	162.0505066	0.1372061483	0.3243804229	0.6631023044	4335	0.4070218341	0.4691866725
1	9481404	9482992	AT1G27290	5.503488947	+	249	252	90.16000366	14.64200001	175.4239929	63.21500015	11.19775035	180.2349972	0.2283419392	3.136974967e-06	0.0001733685595	22823	6.546940171e-08	4.531417876e-06
1	9483156	9484368	AT1G27300	1.409385405	+	108	66	82.18499756	14.38524981	143.0434975	64.18000031	15.27250028	169.9649963	0.2146464646	0.03895960945	0.2394576289	3092	0.07181407798	0.2332032224
1	9484315	9486002	AT1G27310	0.2092583482	-	290	425	53.8049984	15.91549993	153.5879978	52.88000107	12.91000023	160.2559967	0.0569979716	0.6176488708	0.8601634892	60596.5	0.3523132608	0.4469733354
1	9486888	9492632	AT1G27320	2.134146312	+	107	112	100.8300018	16.4179996	216.4229988	72.6099968	11.56950011	234.6537502	0.2222963952	0.007342664547	0.08961010008	4976.5	0.01517728548	0.1030845746
1	9492848	9494382	AT1G27330	1.629727542	+	114	140	70.45000076	12.58225009	152.7410004	55.16500092	11.67475019	166.7217442	0.184962406	0.02345699946	0.1847873518	6686.5	0.01320074585	0.09539965901
1	9495343	9498085	AT1G27340	0.0919702193	+	103	90	78.69000244	19.93099957	176.451001	87.68000031	16.86250067	161.4447502	0.090399137	0.8091513829	0.9432960659	4607	0.4716842388	0.4914293177
1	9497999	9499639	AT1G27350	1.290617953	-	173	224	71.44000244	13.43100004	192.0200073	59.61000061	11.67650034	173.5632442	0.1352188274	0.05121321579	0.2791112778	16177.5	0.002394798693	0.03231977624
1	9505111	9508542	AT1G27370	0.1102728886	-	26	33	142.7999954	75.71125126	196.3562431	135.0800018	84.45599976	249.5059998	0.1666666667	0.7757595155	0.9319040893	423	0.466538894	0.4896852129
1	9510474	9512971	AT1G27385	0.5579535196	-	82	148	69.89999771	11.9672503	185.4909935	70.875	13.51950006	168.8785007	0.1343111404	0.2767237793	0.6248184575	5744.5	0.2519817982	0.3972092908
1	9513080	9515050	AT1G27390	1.05952406	-	131	166	80.11000061	14.2099998	190.3274956	67.06000137	12.73874998	179.3250008	0.1440264876	0.08719185956	0.3671050513	9560	0.03704604814	0.1663453307
1	9515113	9517070	AT1G27400	1.273961172	+	497	818	80.45999908	14.97600002	191.4680023	70.52000046	14.11424975	190.7872494	0.07603813591	0.05321558349	0.2858064861	190029	0.02366129681	0.1318912539
1	9517200	9519025	AT1G27410	0.5731553839	+	14	14	100.8800011	29.31575022	461.4729916	93.10499954	17.73924966	243.5039982	0.3571428571	0.2672050219	0.6151737662	79	0.1976536252	0.3595163861
1	9520824	9527280	AT1G27430	1.386705943	-	33	44	130.0399933	69.08000183	218.6	105.8549995	14.86299958	221.032996	0.3106060606	0.04104819422	0.2475348065	527	0.02051407701	0.1235772111
1	9527500	9528878	AT1G27435	0.4674773261	-	93	149	67.26999664	20.25799961	157.6090012	62.54000092	15.76900024	149.9889954	0.1219600202	0.340818118	0.6785895696	6528	0.2250899192	0.3792589329
1	9528966	9531489	AT1G27440	0.1828626252	-	23	24	88.31999969	18.60100045	159.3579994	92.67500305	19.51675024	191.1422482	0.2047101449	0.6563528491	0.8775723173	247	0.2720846605	0.4067944566
1	9531808	9534141	AT1G27450	0.2333598867	+	364	459	60.625	14.17649987	166.9597553	56.75999832	12.73900023	164.9224991	0.05395149513	0.584305687	0.8408863371	80322.5	0.1712631529	0.3387911545
1	9534487	9537614	AT1G27460	0.4111681357	+	61	84	78.69999695	18.68500042	167.7750015	73.23000336	14.80274997	186.518504	0.1485167838	0.3880001239	0.7115293718	2369.5	0.2209543401	0.3763533043
1	9540048	9544303	AT1G27470	0.0913080865	-	38	47	85.38999939	17.70774999	166.8662567	81.37999725	11.62700009	184.4324951	0.1349384099	0.8103859698	0.9437919635	883	0.4665401326	0.4896852129
1	9544409	9546285	AT1G27480	4.531027815	+	102	50	50.14499855	14.27699978	161.3167503	76.03499985	13.8537498	146.0500011	0.3976470588	2.944233057e-05	0.001308698088	1544.5	4.054033384e-05	0.001361810635
1	9551450	9554422	AT1G27500	0.8686317371	-	13	12	83.45999908	23.19299965	173.6649956	54.18499947	17.89050002	125.1600046	0.4358974359	0.1353219548	0.4532473466	53	0.09132756029	0.2600795629
1	9554709	9558461	AT1G27510	1.191286825	-	64	94	109.5250015	16.88550005	246.4867596	92.01499939	14.82599993	207.9769997	0.2077792553	0.06437439715	0.3161087373	2640	0.09651737982	0.2653452082
1	9558561	9562485	AT1G27520	1.303382309	+	37	38	155	65.58599854	323.1840057	196.3450012	8.035499728	331.4477371	0.3036984353	0.04972991203	0.2743166115	551	0.05419455285	0.2032597879
1	9562486	9564031	AT1G27530	0.4591375617	-	159	210	58.08000183	16.65199986	154.9624962	55.84000015	14.93924987	163.0072521	0.09685534591	0.3474260977	0.6819307068	16666	0.4887958335	0.4975479484
1	9565912	9567906	AT1G27540	0.7134056578	-	118	140	66.19499969	13.09374962	161.5220005	70.26499939	11.02975006	264.8455109	0.1328087167	0.1934614071	0.5361487164	8002	0.3331491049	0.4384572836
1	9574549	9575189	AT1G27565	0.08824779144	+	97	55	93.41999817	18.50999985	190.2179962	85.83999634	18.59499979	193.0339981	0.1045923149	0.8161165943	0.9462966136	2574.5	0.3614198384	0.4509445781
1	9589806	9591075	AT1G27580	0.2301691094	-	15	15	69.95999908	31.07800055	249.6919945	66.34999847	26.32350044	134.4599945	0.2666666667	0.5886144109	0.8430857546	89	0.1700429451	0.3382080626
1	9592087	9602917	AT1G27595	0.03169892152	+	46	34	129.0799942	36.11874914	219.9525013	114.8349991	17.44424952	332.1760086	0.1189258312	0.9296106242	0.9890509959	769	0.4515850407	0.4850567962
1	9603177	9606247	AT1G27600	0.08338545464	-	70	62	90.03499985	22.45724983	217.9412483	90.68000031	19.16474977	199.4779942	0.1069124424	0.8253051314	0.949902762	2105	0.3843447225	0.460586243
1	9611052	9614336	AT1G27630	0.8869488904	+	39	39	154.2299957	14.39449973	335.4140015	108.5	15.2885004	267.1630081	0.2564102564	0.1297331938	0.4439866259	589	0.04373767849	0.1817921524
1	9614550	9616357	AT1G27650	0.232429762	+	136	183	57.38500023	15.04125011	133.8900013	59.40999985	12.19100008	160.730497	0.08642719383	0.5855584304	0.8414749167	11993.5	0.290346	0.4178808901
1	9631189	9634597	AT1G27680	1.218699742	+	20	11	135.3950043	41.33675041	262.0409988	68.58999634	38.48750114	218.4074974	0.4681818182	0.06043663251	0.3062923478	66	0.03625146199	0.1648755792
1	9636587	9638901	AT1G27690	0.9569945756	+	31	40	78	22.68750048	192.9425011	75.29000092	10.74149973	250.2302498	0.2782258065	0.110409241	0.409502068	557	0.2343511766	0.3865079259
1	9639023	9640204	AT1G27695	0.7451788434	+	93	88	74.5	14.74599991	178.123999	60.76000023	9.331250381	158.3017509	0.1599462366	0.1798130289	0.517643568	3407	0.02601543937	0.1386123208
1	9639858	9641902	AT1G27700	0.1533526622	-	24	27	86.60499954	26.57699947	181.76875	78.87999725	11.44400005	197.3129967	0.1898148148	0.7025016325	0.903313015	323	0.4962357793	0.4994658994
1	9657172	9661994	AT1G27750	0.04549884589	+	31	27	91.08000183	16.11999941	177.1899986	93.61000061	28.24949932	212.3709999	0.1445639188	0.9005361559	0.9789454072	399	0.3835463732	0.4601190777
1	9662020	9667550	AT1G27752	0.2324381686	+	14	16	73.88500214	17.2189992	142.6562477	55.10000038	8.28125	168.1325054	0.2678571429	0.585547096	0.8414749167	95	0.2463836488	0.3933328908
1	9668507	9671657	AT1G27760	0.3603467385	+	170	136	94.04499817	23.46399956	228.3154968	91.97500229	19.70000005	209.2100067	0.09852941176	0.4361674593	0.7455924501	11442	0.4392860214	0.480786449
1	9671631	9676307	AT1G27770	0.4233948397	-	56	55	98.23999786	19.98000002	191.3199997	93.16999817	15.80049973	164.7900009	0.1685064935	0.3772290764	0.7042158522	1392	0.1921616854	0.3550813752
1	9693007	9696546	AT1G27840	0.2681682889	-	34	24	117.1100006	29.0220006	287.1252396	93.75	24.52900008	215.7645027	0.2058823529	0.5393016029	0.8128109496	356	0.2080895908	0.3674425335
1	9698297	9703944	AT1G27850	0.9991102397	+	27	44	96.66999817	22.68949986	249.8450073	75.07500076	17.75825005	175.8377563	0.2887205387	0.1002050849	0.3926883012	476	0.08200255687	0.2471810792
1	9715341	9720629	AT1G27900	0.3633462709	-	31	30	73.34999847	27.625	168.7949982	101.3950005	33.39374981	253.445998	0.2150537634	0.43316537	0.7443648189	404	0.1913893689	0.3545667254
1	9720732	9724800	AT1G27910	0.00168947896	-	29	29	74.97000122	21.16399994	181.3830063	75.88999939	10.40199995	240.7489975	0.1034482759	0.9961173878	0.9999976789	413	0.4566571316	0.4865497293
1	9726606	9730424	AT1G27921	0.1332165976	-	11	11	257.519989	66.35249996	544.0800018	276.6199951	189.217495	406.0374985	0.2727272727	0.7358400173	0.917039754	51	0.2772652032	0.4101136965
1	9730958	9733000	AT1G27930	0.2439192958	-	177	179	67.58000183	17.23599968	138.5500031	62.18999863	12.45750008	160.9719963	0.08196824796	0.5702702348	0.8327182904	14895.5	0.1650582067	0.3345121353
1	9740507	9742159	AT1G27950	3.408896047	+	769	1229	52.09999847	12.6619997	154.2120026	43.31000137	11.30400028	153.0850021	0.09448090733	0.0003900353348	0.01088131207	422145.5	2.945724645e-05	0.001049414405
1	9746708	9748467	AT1G27970	2.626172509	+	249	406	69.38999939	17.22400055	163.7500031	56.30999947	12.37000024	158.1474991	0.1462500247	0.002364980103	0.040288404	41987.5	0.0001358858229	0.00363069933
1	9748505	9752769	AT1G27980	0.08635219774	+	52	42	104.9900017	16.74999983	220.5329945	103.5550003	10.82074955	201.2784935	0.1272893773	0.8196865374	0.9475975361	1059.5	0.4038622105	0.467935314
1	9763210	9768113	AT1G28010	0.01684583792	+	13	34	91.62999725	24.752001	201.0419998	102.8100014	21.5697505	265.7549973	0.1561085973	0.9619536837	0.9984321852	210	0.4014030919	0.4670445534
1	9778850	9782907	AT1G28060	0.8868606399	+	17	16	74.91999817	34.02999954	129.9940033	109.0400009	21.33749974	139.5687447	0.3860294118	0.1297595588	0.4439866259	92	0.05856283928	0.2119669747
1	9782846	9784091	AT1G28070	0.9841426333	+	25	19	72.93000031	19.49199982	181.4580048	31.82999992	15.30949979	195.2119949	0.3536842105	0.1037187721	0.3975612745	144	0.01377843201	0.09745474901
1	9795717	9799116	AT1G28090	0.1652693263	+	51	33	116.3300018	37.53750038	267.1675034	104.1699982	18.49999962	169.7720032	0.1550802139	0.6834876532	0.8936553503	738	0.1727490257	0.3401391342
1	9801081	9804394	AT1G28100	0.7749875992	+	40	41	98.16999817	23.7697495	246.016256	94.58000183	23.07999992	284.25	0.2396341463	0.1678851955	0.4997360879	731	0.2015781197	0.3622574146
1	9803640	9806899	AT1G28110	0.153793962	-	24	39	80.22500229	16.59900005	160.5277542	80.76999664	20.45299911	221.5180061	0.1762820513	0.7017881618	0.9031799147	438	0.3381464326	0.4409269328
1	9812929	9815560	AT1G28120	3.450327806	-	109	135	90.93000031	16.17299929	197.8749969	64.51999664	13.26150017	173.0580025	0.2630648998	0.000354545677	0.01002591715	5544	0.0004703374602	0.01000930452
1	9825168	9828118	AT1G28130	0.9983671376	+	64	75	83.9149971	16.3257499	168.2182503	62.36999893	11.99700036	262.9595032	0.2033333333	0.1003766882	0.3929370219	2001.5	0.04629792509	0.1871989166
1	9831875	9834510	AT1G28140	0.03846096368	-	157	164	84.29000092	14.43400011	217.7770065	88.02000046	18.81950011	193.8197559	0.06132515147	0.9152485222	0.9826515933	12689	0.4121699513	0.4710189671
1	9834641	9836210	AT1G28150	0.03546523447	-	208	233	70.875	17.34849968	166.2399975	66.94000244	14.1960001	151.7040039	0.05193545725	0.9215836591	0.9863204834	23831.5	0.3823231618	0.4598469438
1	9849843	9852449	AT1G28200	1.119363941	-	101	130	62.54000092	7.985000134	152.9549942	51.09000015	10.38574982	173.193499	0.1666412795	0.07596893868	0.3416477005	5942.5	0.1085009796	0.2793159823
1	9862040	9864779	AT1G28230	1.408621298	-	18	18	79.80500031	25.15724993	206.3795017	52.42000008	14.82300012	166.1177513	0.4444444444	0.03902821622	0.2394576289	102	0.02988430433	0.1485073665
1	9868256	9872278	AT1G28240	0.3616686237	-	52	50	114.0550003	34.19249945	287.6962524	120.9300003	17.43175015	235.9859966	0.1676923077	0.4348418916	0.7450236659	1256.5	0.3867330027	0.4618424007
1	9874246	9875579	AT1G28250	0.5838518865	+	58	82	65.5	11.33924978	157.2527515	55.06999969	10.69025006	159.3867493	0.1690496215	0.2607042515	0.6090705989	2218	0.2499281964	0.3956619198
1	9875526	9879433	AT1G28260	0.1872615145	-	49	41	81.02999878	20.96399918	184.3839966	86.66999817	13.89000034	150.0399933	0.1513190642	0.6497383265	0.8743058803	904	0.2089192012	0.3678547049
1	9885399	9887478	AT1G28280	0.03373449842	-	135	102	68.08000183	13.4940001	131.444503	72.57500076	13.18199995	150.8155006	0.07058823529	0.9252636517	0.9883525966	6646	0.3240593754	0.4338596634
1	9889100	9891015	AT1G28290	0.524213248	-	319	200	55	13.33750014	143.217498	53.81500053	14.52474971	179.5042564	0.08681818182	0.299079573	0.6467030073	30292	0.1668258467	0.3361529163
1	9912202	9913837	AT1G28310	0.529266181	-	35	43	71.76000214	19.31050081	306.6039886	97.25	20.67299967	184.1175049	0.215282392	0.2956200043	0.6431497772	708.5	0.3310485978	0.437435579
1	9920218	9924488	AT1G28320	0.258845181	-	60	48	132.1650009	29.97125072	292.2655014	115.7249985	15.84024982	213.3897465	0.15	0.5510040855	0.8204942508	1288	0.1744601976	0.3415650555
1	9933785	9935440	AT1G28330	2.46353626	-	690	567	76.24000168	14.2747499	178.5100067	65.95999908	11.58550029	187.4739967	0.1004064106	0.003439249949	0.05318031703	177089	0.00190969637	0.02778522196
1	9939960	9943616	AT1G28340	0.05397906791	+	83	119	84.61000061	14.31700029	188.6639969	85	17.43949909	180.0675018	0.08210995241	0.8831224641	0.9734471952	4823	0.389225663	0.4625301896
1	9943736	9949835	AT1G28350	0.06745431447	+	40	42	81.30000305	8.988750005	178.2287498	90.25	11.43524985	188.3129993	0.1297619048	0.8561417687	0.9630104169	776	0.27790545	0.4105401431
1	9963447	9966320	AT1G28380	0.5687130501	+	57	76	85.04000092	26.29800034	205.997998	69.42499924	11.02874982	266.5699997	0.1710526316	0.2699522489	0.617817027	1771.5	0.03661515791	0.1657368535
1	9969245	9971681	AT1G28395	0.1721418815	-	38	75	75.79499817	18.93774979	176.804007	56.93000031	16.9274992	162.4300049	0.14	0.6727568347	0.8871015687	1230	0.1185931871	0.291913967
1	9972184	9973942	AT1G28400	1.024771574	-	197	142	41.11999893	11.21799974	119.618	36.01999855	8.984250164	103.2857496	0.1340530493	0.09445575547	0.3805822447	12613.5	0.06151080997	0.2168468646
1	9976181	9979793	AT1G28410	0.005105723733	-	32	38	79.52000046	21.48475051	260.7605072	79.36499786	19.54449992	210.8847565	0.1036184211	0.9883124727	0.9999976789	601	0.4694583011	0.4906576837
1	9979477	9987737	AT1G28420	0.1026508041	+	19	25	89.20999908	14.19650011	206.5039986	97.06999969	16.81200056	152.8419983	0.1894736842	0.7894946582	0.9361199734	227	0.4063518431	0.468988732
1	9996712	10000455	AT1G28440	0.8256224355	+	158	206	83.12000275	15.2317502	146.3894997	70.20000076	15.64124966	149.1137562	0.1187784196	0.1494092771	0.4737379348	14411.5	0.03064619027	0.1505890384
1	10015855	10018047	AT1G28490	0.6578219257	+	56	68	100.0449982	13.82250035	207.4662495	86.76000214	14.13274996	220.7122486	0.1848739496	0.2198761249	0.566151894	1787	0.2792932377	0.41150808
1	10023816	10026311	AT1G28510	0.03853897336	+	65	75	70.59999847	16.37400017	198.9039978	65.02999878	19.24149923	159.8364998	0.09230769231	0.9150841364	0.9826336944	2411.5	0.457574708	0.4867713254
1	10029082	10031990	AT1G28520	0.1199904252	+	89	68	95.72000122	16.39799957	256.6140106	85.97499847	17	206.0337547	0.1057501652	0.7585942995	0.9256353377	2784	0.1961317095	0.3581374872
1	10031984	10035638	AT1G28530	0.3111851705	-	13	26	124.4400024	33.86000023	247.5520081	123.0699997	36.80749893	229.0537529	0.2692307692	0.4884440566	0.7812882693	156	0.3547966914	0.4476147825
1	10035616	10037403	AT1G28540	1.408952491	+	39	52	87.48000336	15.38050032	167.8850067	54.32999992	11.54099982	221.6827511	0.2884615385	0.03899846464	0.2394576289	741	0.01443007843	0.0999266199
1	10041575	10044258	AT1G28570	0.02471998711	-	15	17	73.13999939	34.89299984	166.9675011	66.80000305	18.13999996	143.4600006	0.1764705882	0.9446697591	0.9936750298	115	0.3252193057	0.4339143206
1	10044336	10046552	AT1G28580	0.06723487576	-	189	134	59.45999908	15.83999996	186.652002	56.80999947	17.49225063	233.8895035	0.06740108979	0.8565744661	0.9630658618	12080	0.2405859805	0.3896720779
1	10050956	10053218	AT1G28600	0.1607096934	-	91	90	76.33999634	10.56750035	183.2550011	76.20499802	11.28949976	204.1939995	0.1037851038	0.6907013528	0.8979273867	3951	0.3419452413	0.4427375771
1	10053442	10055881	AT1G28610	0.8455502263	-	21	32	113.2099991	24.81999874	269.5750046	50.21999931	17.80075021	170.8819954	0.3095238095	0.1427084778	0.4650699407	227.5	0.02476501099	0.1348968418
1	10071608	10073549	AT1G28660	0.1876836823	-	17	39	63.75	27.6640007	227.3539948	58.29000092	12.3179997	182.3484978	0.2051282051	0.6491070375	0.8740754854	276	0.1635246555	0.3332628811
1	10074358	10076457	AT1G28670	1.549982591	-	96	104	78.61999893	12.92999995	206.664999	49.40500069	13.09499969	217.837001	0.202724359	0.02818495909	0.2045273991	3878	0.00323561349	0.03981925464
1	10078188	10079909	AT1G28680	0.004154347343	+	84	40	85.86500168	24.94450049	162.7355007	83.40500259	25.03499956	149.8912495	0.08214285714	0.9904798679	0.9999976789	1664.5	0.468047545	0.4902407629
1	10086365	10089772	AT1G28710	0.2525679312	-	17	30	110.5999985	13.62800026	198.5839996	81.19499969	11.97975039	274.3095055	0.2294117647	0.5590260794	0.82515317	252	0.4779294439	0.4936724815
1	10109499	10111738	AT1G28960	0.3403174122	-	55	72	98.58000183	22.18450003	300.3735062	91.57999802	18.14975004	219.3844967	0.1494949495	0.4567542402	0.7601523091	1756.5	0.1389531893	0.3118216219
1	10133982	10136124	AT1G29040	0.4955958416	+	94	90	74.07500076	13.09074972	212.371751	57.72999954	10.97725024	176.6107494	0.1382978723	0.3194509312	0.6614272486	3817.5	0.1269724857	0.3006738687
1	10136245	10139228	AT1G29050	1.304593939	-	64	39	61.79999924	14.25100005	175.795496	44.38999939	14.08099995	182.5639938	0.2684294872	0.04959136486	0.2738641673	915	0.01188885925	0.09014322855
1	10147604	10149780	AT1G29060	0.6359682443	+	42	51	50.4450016	13.62124991	142.0870026	75.87999725	10.5875001	177.4275055	0.2100840336	0.2312233855	0.5780144562	994	0.2774010881	0.4101754645
1	10149790	10151407	AT1G29070	1.186886109	+	1246	1598	60.34000015	17.08500004	152.244997	63.63999939	14.55250039	169.4439987	0.04923389389	0.06503002052	0.317931836	951662.5	0.0216853702	0.1268542923
1	10162794	10164452	AT1G29090	0.389291826	-	16	26	45.73999977	11.16624975	122.4299984	61.125	12.04499972	133.701251	0.2692307692	0.4080451066	0.7253469475	163	0.1245421374	0.2984857805
1	10174161	10178521	AT1G29120	0.1031552437	+	63	90	89.88999939	14.88899975	247.0175011	84.91999817	12.72899973	218.7424976	0.1047619048	0.7885781806	0.9359436536	2715.5	0.3295522868	0.4365890285
1	10180301	10182808	AT1G29150	0.3239627382	+	289	371	57.06999969	12.62399979	137.223999	55.36000061	11.56750035	153.2000046	0.06556673724	0.4742826762	0.7722612825	51067	0.1477816326	0.3201201237
1	10190136	10195213	AT1G29170	0.485375789	-	24	14	125.0400009	39.44474974	249.9565071	106.0099983	24.22425017	166.5882511	0.3035714286	0.327057574	0.6661530884	118	0.06707466118	0.2260909216
1	10210519	10212722	AT1G29220	0.5711833799	-	46	38	86.70500183	20.78500056	154.8387508	80.68999863	14.14100027	337.3317535	0.2128146453	0.2684210804	0.6165866075	858	0.4446076819	0.4829257371
1	10223265	10224799	AT1G29250	1.296284695	-	199	249	66.48000336	13.53050013	173.116507	58.63999939	15.0460001	161.8319946	0.1273637263	0.05054931852	0.2770491496	22508	0.04796455304	0.1907065775
1	10224814	10226322	AT1G29260	0.1817319126	+	54	75	64.67500114	13.84999988	129.8180021	63.58000183	13.88700023	138.8630051	0.1274074074	0.6580639309	0.8782443518	1955	0.370020008	0.4543968246
1	10229807	10231384	AT1G29270	0.2645745142	+	17	19	85.54000092	11.04399986	172.4320007	62.77000046	21.08949966	270.1040047	0.253869969	0.5437828241	0.815862651	143	0.2842114581	0.414384932
1	10236336	10237990	AT1G29280	1.200022749	+	57	20	53.18999863	9.547999763	129.9259979	74.65499878	14.66074965	118.0239998	0.3289473684	0.06309242947	0.3128987134	442	0.06928237747	0.2293893751
1	10247706	10249704	AT1G29300	0.7852839557	-	22	13	68.63000107	9.603499722	246.5015057	79.33000183	40.87899971	145.6990005	0.3706293706	0.1639517454	0.4944063524	89	0.03389050925	0.1588515163
1	10252240	10254792	AT1G29310	0.05798276632	+	88	97	71.5399971	14.68999958	160.7969997	66.66000366	11.66599979	232.8999969	0.08540299906	0.875018497	0.9702772242	4167.5	0.3916885515	0.4634362626
1	10255249	10258343	AT1G29320	0.08928942039	+	18	14	67.32500076	20.13000016	187.0532478	88.06000137	13.52350013	130.369504	0.2142857143	0.8141615337	0.945161692	122	0.4471148777	0.4837947404
1	10258247	10261232	AT1G29330	0.153036563	-	46	47	58.66999817	20.13625002	193.2787495	67.04000092	14.66950006	162.4085052	0.1419981499	0.7030131312	0.9033146978	1001	0.2706348226	0.4057847272
1	10264042	10266917	AT1G29340	1.426622438	+	75	95	65.87999725	14.28950005	121.8255005	54.13999939	10.11800022	164.4969994	0.2133333333	0.03744359697	0.2360261851	3141.5	0.09347207492	0.2619722729
1	10268420	10273821	AT1G29350	0.08562607489	-	219	248	77.58000183	19.44899988	182.3775024	76.09999847	17.55225086	212.6029976	0.05779569892	0.8210581666	0.94824819	27048.5	0.4706962769	0.4910348477
1	10273930	10275765	AT1G29357	0.5065467563	-	32	24	160.2850037	68.50550213	240.2937496	190.5050049	60.30475082	333.1857582	0.25	0.311496552	0.6555616624	305	0.09685235514	0.2658276345
1	10277747	10283225	AT1G29370	0.2747293717	-	199	227	77.11000061	19.45899916	180.7355026	77.33000183	17.54000092	216.4459961	0.07747991057	0.5312153651	0.807440498	22366	0.4311196852	0.4780169826
1	10286066	10288103	AT1G29390	0.3555173611	-	147	148	70.95999908	18.7550004	156.9034958	76.16999817	16.07149954	199.7242512	0.09932892076	0.4410447318	0.7480069128	10214	0.1825407599	0.3481015409
1	10288128	10289666	AT1G29395	0.3888040061	-	267	172	107.0699997	17.63899965	209.3810013	108.9799995	29.31099954	196.4632484	0.08579392039	0.4085036994	0.7256020129	22610.5	0.3933915452	0.4640208527
1	10289997	10294630	AT1G29400	0.9064061561	-	145	117	127.7200012	25.79199982	252.7040039	117.7699966	26.21900005	254.7889984	0.1441202476	0.1240491646	0.4349950802	7775.5	0.1233016512	0.2970643958
1	10297749	10300073	AT1G29410	0.07524139442	-	20	15	135.9499969	38.88950014	196.4264992	131.9600067	23.88750005	288.2845024	0.2	0.8409275979	0.9570664848	139	0.3631693488	0.4510868603
1	10300877	10301302	AT1G29418	1.810560519	+	123	144	84.48000336	13.81749988	241.6275063	59.69999886	13.79674993	208.922747	0.1883468835	0.01546818938	0.1462785509	7140	0.003189870041	0.03935888034
1	10301376	10302099	AT1G29420	0.01198136646	-	21	21	53.83000183	11.48000026	135.5400047	54.41999817	16.33500051	131.1799965	0.1428571429	0.9727889607	0.9999976789	205	0.3529619228	0.4470407505
1	10302584	10303418	AT1G29430	0.4967617375	-	132	197	66.36999893	11.58824985	116.0125021	58.66999817	11.83999987	221.5929993	0.1060990617	0.3185944914	0.6604104427	12661.5	0.3438193446	0.4430749266
1	10304506	10305108	AT1G29440	0.5222332288	-	223	339	61.36999893	14.44999986	134.8060005	58.22000122	9.23150034	142.9674965	0.0829397992	0.3004462386	0.6470709457	35729.5	0.136026385	0.3093869471
1	10305552	10306595	AT1G29450	1.205297613	-	147	187	64.87000275	9.049000025	126.8019989	55.31999969	8.690000296	149.4290031	0.143075412	0.06233075492	0.3110118513	12298.5	0.04946247572	0.1937718163
1	10307351	10308246	AT1G29460	1.061857518	-	111	136	64.34999847	11.44249988	132.079998	62.30999947	11.18250012	156.0062542	0.1575251722	0.08672463522	0.3659049559	7475	0.4483626374	0.484171689
1	10308519	10309896	AT1G29465	1.036898669	+	81	139	77.72000122	16.67000008	166.6199951	61.95999908	15.36500001	198.4759995	0.170263789	0.09185468908	0.3752411202	5137	0.1399680135	0.3127494353
1	10310130	10314147	AT1G29470	4.026173484	-	286	380	76.08000183	15.31750035	180.3449993	58.33499908	14.08350015	167.621748	0.1729849098	9.415134236e-05	0.003455782225	44930.5	6.453772689e-05	0.001969004737
1	10321010	10321978	AT1G29500	1.719854287	+	187	229	65.41999817	13.652	151.5170059	55.91999817	10.19699965	155.5690002	0.1484249118	0.01906100138	0.164313281	17994	0.002546407249	0.03380094006
1	10322422	10323239	AT1G29510	0.3932927042	+	114	169	63.22499847	13.39375014	120.6560005	55.91999817	9.168000031	153.9519958	0.106353161	0.404303309	0.7229542039	9053	0.1953906252	0.3575928906
1	10323635	10324826	AT1G29520	0.01128598241	+	35	41	72.37000275	22.97950077	156.884005	76.19000244	28.42000008	174.7200012	0.1073170732	0.9743478195	0.9999976789	679	0.3460499174	0.4439572509
1	10324744	10326848	AT1G29530	0.8382068039	-	26	48	91.63999939	7.845000029	155.5025043	74.76000214	9.853500104	172.2297523	0.2692307692	0.145142031	0.4672614128	520	0.1206172523	0.2944448793
1	10330424	10332326	AT1G29550	0.2379663483	+	18	30	81.10499954	14.22400002	123.8704996	47.08500099	13.15325038	177.5857456	0.2222222222	0.5781408434	0.8377307505	250	0.3389722153	0.4411939032
1	10371674	10374005	AT1G29660	6.669820848	+	423	797	68.33000183	15.73650017	196.9390038	52.11000061	13.24399996	180.2149933	0.1691301008	2.138844207e-07	1.523926497e-05	138537.5	1.472960088e-07	9.557801287e-06
1	10375598	10377871	AT1G29670	0.008591068963	+	234	483	41.32500076	10.54174976	158.2042503	41.54000092	9.812500381	154.6594986	0.03697510219	0.9804127061	0.9999976789	56106	0.4381944976	0.480786449
1	10379019	10382153	AT1G29690	0.8261695162	-	41	31	111.6500015	21.27000046	199.6999969	71.77999878	17.05999923	181.0050011	0.2619984264	0.1492211848	0.473358778	468	0.02876846382	0.1453299781
1	10384944	10387441	AT1G29700	0.1652363247	-	99	178	91.66000366	13.91049986	229.4074966	82.81000137	12.21725006	200.6587524	0.08835546476	0.6835395928	0.8936553503	8235	0.1838705949	0.3491264807
1	10387513	10389286	AT1G29710	0.8284701543	+	19	18	80.80999756	14.40900021	133.0445007	53.84499931	8.010500109	190.5697504	0.3567251462	0.1484327883	0.4724712887	105	0.02327679757	0.131254737
1	10413852	10420774	AT1G29750	0.8531142935	-	35	17	134.8000031	30.92000093	293.5189926	105.9000015	12.96599998	217.3019958	0.3260504202	0.1402444574	0.4607715163	241	0.1373283626	0.3106047523
1	10422291	10424513	AT1G29760	0.2335059834	+	34	40	98.89999771	13.36374972	151.3550026	98.36000061	22.76550031	251.5719936	0.175	0.5841091596	0.8408863371	637	0.3224062488	0.4332683802
1	10426778	10429143	AT1G29785	2.011025558	-	57	64	64.23000336	14.3260004	114.4820023	41.84499931	11.31549997	125.0332512	0.289747807	0.009749322616	0.1078435344	1271	0.002059502935	0.02923327652
1	10429717	10432123	AT1G29790	0.590306979	+	44	60	56.04999924	10.17400036	146.3792444	65.20999908	13.14625008	171.0230042	0.1954545455	0.2568579553	0.6052902691	1087	0.0630408351	0.2195778908
1	10432598	10435441	AT1G29800	0.1042546313	+	30	37	100.6500015	18.57200046	204.4012501	87.12000275	27.59500046	205.4379944	0.154954955	0.7865844719	0.9351682236	547	0.4623296987	0.4876959265
1	10435373	10437558	AT1G29810	2.733200709	-	35	59	86.75	35.01900072	191.2594955	68.84999847	12.05599966	152.532003	0.3869249395	0.001848414176	0.03333337475	636	0.0009768771447	0.01723168604
1	10437656	10440786	AT1G29820	0.1452201141	+	20	25	75.34000015	20.36299994	225.2505077	67.30000305	11.98799992	175.6380005	0.2	0.7157805382	0.9090443558	212	0.1958439502	0.3580168301
1	10445618	10447753	AT1G29840	1.19999544	-	36	24	97.42499924	15.47625077	268.7075005	50.04000092	19.09300046	170.3330029	0.3333333333	0.06309639691	0.3128987134	302	0.0253468726	0.1366024446
1	10447346	10449969	AT1G29850	0.2540714232	+	212	230	56.68499947	12.24624972	170.268998	58.07500076	13.951	152.4674999	0.07448728466	0.5570941228	0.8235188467	24276.5	0.4694030685	0.4906576837
1	10459456	10462967	AT1G29880	0.1992951551	-	156	228	82.25999832	13.16874993	202.6849957	77.02499771	13.76825006	247.9742435	0.07658569501	0.6319821978	0.866819542	17461	0.3813648748	0.4597197124
1	10463028	10467452	AT1G29890	2.214031725	+	48	66	115.954998	20.53824959	187.5592453	63.02999878	12.50749993	166.4037495	0.3143939394	0.00610897397	0.08049419731	1020.5	0.0006164315856	0.01222351036
1	10467955	10472211	AT1G29900	0.3317113486	+	191	195	73.20999908	26.12249947	162.6049995	72.95999908	16.97350035	196.7709961	0.08535373876	0.4658956456	0.7661705194	17520	0.1573276505	0.328457322
1	10472279	10473502	AT1G29910	17.92184824	-	26254	25709	54.88000107	13.21325011	142.8370033	51.72000122	12.57400007	142.2389954	0.04014647381	1.197158783e-18	3.480140582e-16	321251821	1.117701709e-21	3.384540486e-19
1	10474655	10475969	AT1G29920	52.89030707	-	22661	28028	56.47000122	10.97000027	146.9400024	49.74000168	10.39674985	147.7597496	0.06983376241	1.287339009e-53	1.439344038e-50	291260259	2.311675901e-58	2.400014945e-55
1	10477884	10479114	AT1G29930	48.39169797	+	68068	65810	60.04000092	16.25675015	141.7297508	57.58000183	14.32224975	144.648753	0.0409049463	4.057906485e-49	4.212976482e-46	2127254001	2.416171486e-57	2.34127017e-54
1	10479006	10486824	AT1G29940	2.012151141	-	57	47	116.6399994	50.13599854	270.9399963	98.69999695	16.16200066	190.8610039	0.3128032848	0.00972408751	0.1078105354	891	0.001716259931	0.02569257821
1	10491697	10494598	AT1G29950	0.7747588829	+	138	102	105.1399994	37.81849976	253.1372478	95.20500183	26.50725064	199.8222519	0.1427962489	0.1679736337	0.4997498342	6426.5	0.1252431671	0.2991349796
1	10494626	10496205	AT1G29960	1.605433849	+	19	22	91.41999817	35.06650057	129.4475018	55.08499908	20.3307508	122.0349998	0.4425837321	0.02480653759	0.1910773842	111.5	0.00560453847	0.05672838904
1	10498309	10499462	AT1G29965	0.6195152491	-	118	134	73.29499817	12.45824955	170.3962536	79.29000092	11.95474963	198.1342571	0.1277510751	0.2401511943	0.5877144163	7125	0.08822077231	0.2558734699
1	10498350	10501498	AT1G29970	0.4212224536	-	216	268	63.66000175	12.74624956	173.7887497	68.45500183	13.22374971	198.7855049	0.08222775014	0.3791207426	0.7058251497	28416.5	0.3652211284	0.4522670512
1	10503238	10506189	AT1G29980	0.9778826557	-	38	32	82.09500122	20.35375071	183.8157505	45.39999962	19.59649999	171.2774975	0.28125	0.1052246147	0.4009419518	463	0.04422979926	0.1828441787
1	10507532	10509151	AT1G29990	0.3806505104	+	80	160	74.28000259	16.66574979	166.674004	62.60500145	14.24375	165.003756	0.11875	0.4162454408	0.7332599056	5806	0.1208853824	0.2946619207
1	10509155	10512558	AT1G30000	0.7932384462	-	42	57	82.83499908	18.44249964	125.1327536	66.41999817	17.29200001	247.1799927	0.2218045113	0.1609761565	0.4901345314	1117	0.2867665948	0.4159002649
1	10546510	10548236	AT1G30070	1.887086077	-	51	52	64.87999725	12.45749998	204.1225052	40.2349987	13.25325019	203.1085026	0.3042986425	0.01296922195	0.1306268128	1055	0.03719194001	0.1665685984
1	10559495	10561545	AT1G30090	0.3175325671	-	43	84	73.5	11.52599983	148.7220024	61.65999985	15.29074988	151.5824936	0.1533776301	0.4813571563	0.7761843056	1656	0.2231357639	0.3778283234
1	10581734	10584152	AT1G30110	1.17467733	+	18	11	90.71500015	25.38674917	158.1280018	35.72999954	21.34500027	143.4949989	0.4696969697	0.06688406645	0.3223177841	54	0.02274331598	0.1294338676
1	10584104	10586680	AT1G30120	0.7071043762	-	412	546	57.65999985	10.31324987	164.6559998	52.42499924	8.432500362	186.5149994	0.06971264981	0.1962888469	0.5387425802	105075.5	0.04046699738	0.1749501715
1	10587470	10590209	AT1G30130	1.795720489	+	59	62	85.5	17.94849963	210.7204948	59.40000153	12.29924984	176.1764946	0.2755604155	0.01600587832	0.148845452	1379.5	0.009948517019	0.08123690723
1	10624999	10627135	AT1G30200	1.108747883	+	62	58	96.15999985	16.85874984	238.9357445	114.2849998	11.56774993	207.9902504	0.2269187987	0.0778488348	0.3462462711	1609.5	0.1617491531	0.332018633
1	10627184	10630630	AT1G30210	0.01341055974	-	145	136	81	19.15	191.3799927	79.5	15.2475003	180.6500034	0.05765720081	0.9695929304	0.9999976789	9729	0.4239883975	0.4757672923
1	10638877	10640941	AT1G30230	3.768482707	+	1481	2097	59.79999924	14.30000019	203.9700012	50.72999954	13.09999981	202.8119995	0.07316229706	0.0001704187176	0.005578910047	1443813.5	0.0001705313953	0.004379282386
1	10641030	10646195	AT1G30240	0.2515258487	-	18	12	99.38999939	45.26299963	153.2872517	96.62000275	12.11650035	166.3712559	0.2777777778	0.5603690638	0.8260612923	100.5	0.3834750656	0.4601022237
1	10650913	10651829	AT1G30260	1.943760934	+	30	40	66.42499924	14.5565002	127.4637518	40.87999916	12.47200046	97.71450062	0.375	0.01138253689	0.120944596	423	0.01810018552	0.1147344948
1	10654799	10658924	AT1G30270	0.297945798	+	125	92	88.37999725	18.6220005	227.5559952	84.14500046	12.17725027	256.1719997	0.1113043478	0.5035634519	0.7896531205	5293.5	0.15922436	0.3302403767
1	10670128	10672836	AT1G30290	0.5068458683	-	13	19	45.24000168	26.70799942	92.77900085	74.33000183	28.32049999	282.9369995	0.3279352227	0.3112820885	0.6555616624	95.5	0.1456542163	0.318454277
1	10680078	10683137	AT1G30320	2.348484531	+	11	20	108.75	38.58249855	178.2175026	58.80999947	9.777749932	147.5197468	0.6181818182	0.004482450159	0.06457127162	50	0.007014394207	0.06527158758
1	10685821	10690988	AT1G30330	0.06419792732	-	62	49	120.3499985	34.68375015	199.435994	116.8000031	44.33199997	351.0260071	0.111915734	0.8625853396	0.9645109556	1487.5	0.4269680711	0.4763205858
1	10715481	10718997	AT1G30360	2.159659661	+	294	477	69.33499908	11.05199995	172.2245022	57	11.03999996	188.1170013	0.1236255508	0.006923733432	0.08645744453	61634	0.002366095896	0.03202160507
1	10722182	10723247	AT1G30380	8.258314375	+	11309	11529	62.15000153	13.11999989	160.9509979	58.33000183	12.00599995	163.6019958	0.04147980057	5.516779485e-09	5.206908429e-07	61965958.5	4.786049576e-11	5.040958739e-09
1	10727316	10738092	AT1G30400	0.7444949837	+	148	104	100.5199966	24.83099985	225.1237499	95.31999969	19.64199967	228.105751	0.137993763	0.1800963936	0.5179955456	7409.5	0.3078153046	0.4264198712
1	10738682	10747563	AT1G30410	0.2357271622	+	29	19	136.8899994	66.26499977	290.2189941	161.4199982	47.87199879	244.4125107	0.219600726	0.581129387	0.8393834483	245	0.2635408028	0.4028236644
1	10758742	10762429	AT1G30440	2.122512503	+	62	116	79.50999832	16.91999998	172.750753	53.51499939	11.69750023	170.8875046	0.2572302558	0.007542016822	0.09112486659	2841	0.01062358817	0.0847031564
1	10762707	10769616	AT1G30450	0.4995885298	+	37	34	88.80999756	31.83199902	210.2289963	82.34999847	25.32075081	236.3450016	0.220190779	0.3165275165	0.6590904016	586	0.3123554228	0.428862488
1	10770812	10775428	AT1G30460	0.6555679797	-	41	25	89.43000031	16.04000092	211.8000031	67.06999969	14.44999962	182.4159973	0.2565853659	0.2210202268	0.5665835973	411	0.09092237972	0.2595235208
1	10779110	10786697	AT1G30470	0.6872114741	+	66	102	110.0649986	20.07125008	215.4937553	97.56499863	14.79049997	256.791758	0.1648841355	0.205488975	0.5501532975	2838.5	0.04349098088	0.1813892129
1	10788225	10790241	AT1G30475	0.295802882	-	18	14	93.51499939	26.42749996	226.5745106	69.73500061	33.7647501	281.3324966	0.2777777778	0.5060542983	0.7905738635	112	0.3040377117	0.4241839602
1	10790021	10792725	AT1G30480	0.2918161671	+	34	38	56.83500099	16.91275017	206.9400017	72.01000214	11.89024968	230.9070045	0.1873065015	0.5107211378	0.793770997	632	0.4394845929	0.480786449
1	10796123	10801093	AT1G30490	0.8311018375	-	30	29	126.0500031	39.13075037	251.0729958	146.5800018	21.24699974	235.4570038	0.2862068966	0.1475360536	0.4712011732	394	0.2695880329	0.4056259683
1	10804449	10806428	AT1G30500	0.4405076031	-	44	52	102.5750008	21.63350019	211.6759975	81.51000214	12.93200016	234.5317539	0.1835664336	0.3626539373	0.69184604	994	0.1358160467	0.3093209399
1	10806929	10809188	AT1G30510	0.1973197349	-	59	36	74.08000183	17.84800005	176.237999	75.95999908	15.2099998	159.6962528	0.1530131827	0.6348633627	0.8681193818	990	0.2916712108	0.4183925976
1	10810396	10813779	AT1G30520	0.1706783598	+	41	30	107.9199982	26	220.9400024	131.8949966	27.24775014	259.1700024	0.1674796748	0.6750277708	0.8884035358	552.5	0.2352341345	0.3869542943
1	10814611	10816615	AT1G30530	0.02465753904	+	80	90	66.14500046	13.68725026	154.0014954	69.59000015	16.03149986	178.8114952	0.07916666667	0.9448056048	0.9936785549	3423	0.2908081569	0.4180977803
1	10816615	10819419	AT1G30540	0.02708452831	-	23	34	96	12.9829999	198.9539986	74.38999939	16.89350039	219.1894978	0.1381074169	0.9395404266	0.992032721	388	0.4837817628	0.4955429422
1	10828372	10831656	AT1G30570	0.01522830635	+	46	35	77.05500031	22.42124987	165.2737446	81.12999725	30.01599951	176.9559937	0.1080745342	0.9655431645	0.9990819787	760	0.3356876998	0.4398468148
1	10831672	10835635	AT1G30580	1.0427777	-	497	425	67.44000244	13.41000023	189.6079987	63.86000061	11.48600006	196.323999	0.08149130075	0.09061963315	0.3730264423	100224.5	0.09067511382	0.2591354265
1	10835734	10840872	AT1G30590	0.1599534519	-	50	43	187.6299973	19.66424923	350.5549881	181	49.27749901	369.17099	0.1437209302	0.691905126	0.8982258525	1007	0.3014867624	0.4230153612
1	10846512	10850724	AT1G30610	0.1231935059	+	35	30	115.6900024	18.07099957	243.8490028	105.4900017	10.95900021	261.1534981	0.1619047619	0.7530199705	0.92300883	522	0.4868781294	0.4968003445
1	10854516	10858280	AT1G30620	0.06427428676	+	13	11	66.23000336	13.59100008	242.7270081	62.72999954	14.31999993	161.6300011	0.2307692308	0.8624336897	0.9644155777	71	0.5	0.5
1	10858231	10860322	AT1G30630	1.930468196	-	250	264	79.59500122	15.58724997	183.8434948	65.81999969	10.95650039	180.1304958	0.1398484848	0.01173631626	0.1232022422	29114.5	0.01048915984	0.08376919686
1	10860618	10865074	AT1G30640	0.5791257515	+	12	29	101.1150017	10.41750033	269.116758	71.04000092	23.53699951	169.152002	0.3275862069	0.2635568137	0.612327881	145	0.207072164	0.3667349707
1	10881478	10886472	AT1G30680	1.871057969	+	80	99	98.24000168	22.60725002	218.0534935	72.97000122	18.32999916	177.750499	0.2329545455	0.01345680722	0.1336942535	2992.5	0.002511515821	0.03346002059
1	10887606	10890407	AT1G30690	0.2884760925	+	102	142	65.35499954	18.40225072	147.7784954	60.65500069	12.33375006	161.3834984	0.1043910522	0.514664138	0.7955512391	6694	0.1570129355	0.3281681126
1	10936764	10942292	AT1G30810	0.7472816906	-	33	20	89.84999847	41.67400055	168.2899994	107.7900009	17.47349989	161.3595001	0.2984848485	0.1789444814	0.5158850663	321.5	0.4416456812	0.4818707191
1	10944907	10949482	AT1G30820	0.6830550402	-	173	158	113.3199997	16.82199974	233.238002	107.3149986	12.77900007	223.3029995	0.115424014	0.207465057	0.5520220276	12215	0.04754697645	0.1901810234
1	10960907	10963231	AT1G30825	0.1353348935	+	23	24	128	13.49050016	230.8035019	95.67499924	11.87974977	191.8889992	0.1920289855	0.7322596548	0.9157372047	243	0.2445798548	0.3920309566
1	10966906	10968878	AT1G30835	2.26319008	+	70	64	96.33000183	18.52375035	257.7792469	153.1550064	19.8592495	347.0024879	0.2901785714	0.005455190484	0.0744056613	1638	0.003688879744	0.04342676501
1	10979645	10980725	AT1G30845	0.05945416932	+	14	16	59.47999954	23.64849925	154.7565046	77.68500137	18.61250055	239.6925011	0.2053571429	0.872058924	0.9691393485	103	0.3619131556	0.4509773022
1	10993001	10994152	AT1G30880	1.230493086	-	475	582	47.77000046	12.80250039	144.9135056	41.35000038	12.87575002	137.7857502	0.08146862	0.05881754776	0.3011317565	124414.5	0.002576879711	0.03404995146
1	10994242	10996223	AT1G30890	0.5357836243	+	76	71	72.51499939	18.23249936	204.316246	55	12.71749997	171.0849991	0.1582653818	0.2912167667	0.6400779833	2249	0.04105716175	0.1759837612
1	11000861	11003226	AT1G30910	0.493653888	+	96	72	82.60499954	13.07999992	215.621254	100.5950012	24.75499973	216.8420025	0.1458333333	0.3208825587	0.661751985	3033	0.08784105889	0.2553732096
1	11040249	11043773	AT1G30970	0.7842603316	-	63	78	157.4299927	26.77900009	285.6054901	151.7850037	21.06024976	345.9305061	0.184981685	0.1643386323	0.4946494142	2290.5	0.2456021754	0.392633922
1	11054730	11056959	AT1G31010	0.2669198206	-	12	13	90.82999802	21.48450046	154.068256	108.9400024	16.39599962	197.7999954	0.3012820513	0.5408541661	0.8131273588	64	0.2313819853	0.3840512911
1	11057104	11059037	AT1G31020	0.1506084032	+	30	46	57.62999916	17.48574953	242.4387451	63.19000053	11.21249962	263.5049896	0.1594202899	0.7069547175	0.9051077236	669	0.4137725992	0.4714352007
1	11084665	11088589	AT1G31070	1.086415061	+	47	33	96.45999908	16.06899986	216.7590027	59.18999863	21.73200073	208.5539978	0.2778852353	0.08195678983	0.3561356129	631.5	0.08038598702	0.2450229974
1	11104236	11108095	AT1G31120	0.04643293601	-	31	21	93.93000031	24.69000006	230.9025002	91.48000336	20.60000038	269.3050003	0.1551459293	0.8986013444	0.9783046652	290	0.2569667954	0.4002365931
1	11114692	11116195	AT1G31130	1.304315201	-	107	145	72.33000183	14.68350029	193.560495	52.18999863	12.20000019	178.1299988	0.170351273	0.04962320365	0.2739359153	6679	0.02972606573	0.1481174394
1	11119826	11122675	AT1G31150	0.4309245087	+	18	20	83.37000275	35.19774952	184.0617516	75.57000351	17.62300034	182.6767479	0.2833333333	0.370745161	0.699478312	145	0.1565792422	0.3277775108
1	11122603	11124220	AT1G31160	0.3126467941	-	88	136	90.86499786	21.38349948	247.5512451	86.67500305	15.76124954	231.90625	0.1122994652	0.4868029551	0.780378034	5548	0.1789584977	0.3455315839
1	11133409	11135189	AT1G31170	2.658212413	+	124	238	91.08000183	15.43375025	189.5160038	71.89500046	14.97825	191.6224983	0.2014773651	0.002196785166	0.03801222903	11933.5	0.00140992033	0.02222458594
1	11140470	11142716	AT1G31175	0.1043462211	+	22	21	102.8150024	33.31949887	211.3297512	131.9400024	12.50500059	245.9399948	0.1904761905	0.786418604	0.9351682236	231	0.4951536733	0.4990180929
1	11142460	11144717	AT1G31180	1.744553487	-	146	213	109.7249985	19.73375058	235.6075001	87	17.21599941	185.8200027	0.1625828028	0.01800721349	0.1599846259	14027.5	0.05766093396	0.2106312328
1	11144771	11146930	AT1G31190	0.08789300383	+	79	136	81.48000336	17.3895	205.032	77.43499756	15.50250041	197.5400028	0.0879560685	0.8167835757	0.9464203059	5223.5	0.3682300453	0.4538712473
1	11156697	11158683	AT1G31220	0.3616539422	+	12	22	100.3100014	20.87725053	153.894252	62.59000015	12.89649994	169.329248	0.2954545455	0.4348565919	0.7450236659	105	0.1697904388	0.3382080626
1	11158617	11163274	AT1G31230	0.8673921788	-	60	65	105.5900002	31.02799993	242.40825	83.76999664	22.62799988	202.4259979	0.2025641026	0.1357087409	0.4535942115	1667	0.08135430457	0.2462084521
1	11181503	11185396	AT1G31280	0.06439354913	+	14	14	113.8899994	80.20149879	203.1502525	127.9500008	54.93250113	212.4820004	0.2142857143	0.8621968878	0.9644155777	95	0.4542743991	0.4853547012
1	11193624	11196397	AT1G31300	0.7330463206	+	51	110	100.4400024	17.56750011	195.1275063	82.40999985	13.22875025	216.7477489	0.18057041	0.1849071392	0.5244708198	2394	0.06789597926	0.2276512246
1	11212957	11214567	AT1G31320	0.1180801303	+	27	20	63	16.53799939	194.4035053	78.84000015	15.05875049	178.5202499	0.1888888889	0.7619384142	0.9272503124	242	0.2770238097	0.4100347326
1	11214675	11216141	AT1G31330	16.88256929	-	15029	16107	75.73999786	16.39699955	184.011998	70.79000092	15.17000008	184.9465057	0.05037466461	1.310480935e-17	3.463243706e-15	113468211	6.556160508e-22	2.02752751e-19
1	11216809	11217546	AT1G31335	0.0016689448	-	33	29	65.80000305	16.64800072	140.2079987	69.5	20.81300011	174.4019974	0.1003134796	0.996164487	0.9999976789	463.5	0.4189548017	0.4732655664
1	11217694	11219618	AT1G31340	0.864137004	-	144	202	60.85000038	12.85575011	146.6647511	59.26000023	12.81575041	181.6120049	0.1245187019	0.1367297425	0.4548892019	13642	0.162814121	0.3328238772
1	11232317	11237594	AT1G31360	0.1833003483	+	18	13	158.2350006	39.26849909	202.5532513	168.3600006	19.3670001	266.9310028	0.2521367521	0.6556916479	0.87701096	110	0.3973515704	0.4654526956
1	11246816	11249587	AT1G31410	0.1733346722	-	50	64	82.64999771	22.64750061	247.3435005	76.54999924	11.53824987	173.5440022	0.133125	0.6709116416	0.8859544572	1433	0.1708575257	0.3383503557
1	11249599	11253915	AT1G31420	1.077949163	+	195	289	87.97000122	31.90849895	229.140004	74.86000061	16.37799988	212.7420044	0.1153757431	0.08357008365	0.3597043407	24364	0.005760163546	0.05751311562
1	11255835	11258814	AT1G31440	1.997953719	-	95	142	62.34999847	11.26499958	155.5929977	48.9299984	10.24150026	194.9535019	0.2118606375	0.01004722855	0.1104663139	5522	0.009052979476	0.07690535166
1	11265815	11271701	AT1G31480	0.2670115335	+	14	14	106.2749977	33.71600027	237.922007	72.66500092	26.19449954	179.4837494	0.2857142857	0.5407399624	0.8130613733	78	0.1851317863	0.3501482053
1	11273572	11276636	AT1G31500	0.1791804011	-	41	36	98.86000061	20.71999931	186.6699982	89.74500275	16.14249945	213.6212559	0.1612466125	0.6619414834	0.8801865759	660	0.2144053724	0.3715729209
1	11288377	11293799	AT1G31540	0.2037833231	-	22	24	74.81500244	37.6297513	154.7987457	95.56999969	35.70800009	164.8219978	0.2121212121	0.6254846799	0.8642034052	223	0.1865735145	0.3510258975
1	11295445	11297379	AT1G31550	2.112023152	-	45	23	75.48000336	23.4739994	282.026004	42.88999939	9.813999748	218.9159973	0.4115942029	0.007726393953	0.09258296464	324	0.006178122603	0.06047071517
1	11310996	11311989	AT1G31580	32.57264914	+	5438	1958	39.46999931	10.28924994	150.6100033	29.28499985	8.555500388	125.301251	0.161616266	2.675166745e-33	1.851597554e-30	4201195.5	5.782609607e-44	4.669457257e-41
1	11312960	11316582	AT1G31600	0.5196545273	-	47	26	194.2100067	45.12200165	320.0179947	168.4250031	27.31999946	338.3562469	0.2291325696	0.3022354988	0.6493707281	507.5	0.1177059854	0.2907641906
1	11326250	11330791	AT1G31650	0.06769297171	-	52	54	107.0299988	24.8809998	193.604002	89.81999969	17.22650042	236.6174988	0.1146723647	0.8556714235	0.9628539244	1294	0.2444645583	0.3919971789
1	11330923	11333540	AT1G31660	3.336732965	-	66	77	103.9850006	18.31874967	195.5450039	71.19000244	18.12999992	175.1220001	0.3354978355	0.0004605396586	0.01223755747	1643	0.0001393382461	0.003695768991
1	11349696	11355587	AT1G31710	0.06536525752	+	67	77	48.52999878	14.29200053	205.1784973	44.27999878	15.22600021	128.8939987	0.09846869548	0.8602699294	0.9640336681	2446	0.2971236893	0.4210487101
1	11359511	11364288	AT1G31730	2.514734774	+	121	112	93.54000092	33.18999863	239.8000031	72.5	20.05550065	182.4242474	0.2319952774	0.003056787339	0.04909436902	4795.5	5.866277322e-05	0.001821930361
1	11372393	11374301	AT1G31760	0.2222995736	-	23	25	59.18999863	14.49049954	129.2769981	86.13999939	13.74599972	146.5180054	0.212173913	0.5993774868	0.8489526184	257	0.2679162683	0.4044622933
1	11374759	11377885	AT1G31770	0.4291117098	-	22	12	77.01000214	23.41900003	121.1525	59.75500107	14.97400005	346.7579914	0.3106060606	0.3722959315	0.7005853657	116	0.2882237776	0.4166755031
1	11391198	11394748	AT1G31780	0.62419956	+	88	87	75.56999969	16.69074979	192.8887508	70.45999908	12.67249975	173.8779953	0.1528213166	0.237574837	0.5854476288	3420	0.1119778675	0.2836525451
1	11396401	11399714	AT1G31800	0.3224376527	+	122	152	103.3449974	29.27950025	238.8619987	101.8549995	14.91575031	230.060247	0.1008412425	0.4759511136	0.7733828553	8646.5	0.1688438697	0.3378039431
1	11399606	11406809	AT1G31810	0.04885822326	-	22	24	105.1549988	29.29024959	201.9062496	111	17.90499971	227.7582573	0.1628787879	0.8935971536	0.976500611	261	0.4780792154	0.4936724815
1	11410765	11412233	AT1G31812	2.876627197	-	1848	2283	55.82499886	15.17224979	169.6402542	52.79000092	14.43150029	161.5679962	0.05962051527	0.001328534396	0.02678259008	1991780	0.001006382069	0.01751827949
1	11412391	11414502	AT1G31814	0.1989349402	-	16	16	82.70500183	32.98125052	262.8949947	89.11500168	11.83249986	244.691246	0.25	0.6325065973	0.866819542	112	0.2795502033	0.4115946317
1	11414694	11416444	AT1G31817	0.3372774376	-	55	73	70.97000122	13.09599977	167.3764984	67.22000122	12.93799973	138.2000061	0.1486924035	0.4599626447	0.7618868423	1923	0.342986083	0.4429719465
1	11416450	11418464	AT1G31820	0.09834765939	-	21	21	61.70000076	25.5	116.8699989	65.62000275	29.69999886	140.1299973	0.1904761905	0.7973561359	0.9381531773	197	0.2814356184	0.4123240312
1	11418588	11420961	AT1G31830	0.7793677575	-	51	46	70.37000275	25.94500065	151.892498	62.96500015	15.88874996	138.6474991	0.2203751066	0.1662004681	0.4973695292	914	0.03091184355	0.1513499265
1	11422635	11423684	AT1G31835	0.6074416538	-	35	59	62.09000015	15.57399993	223.7364952	67.77999878	16.39100013	126.0274986	0.211622276	0.2469211814	0.5942785702	963	0.2947167704	0.41988429
1	11430099	11434115	AT1G31850	0.6787006173	+	47	47	94.87999725	17.34450006	216.6385002	88.34999847	11.82150011	243.0300041	0.2127659574	0.2095556539	0.5536950573	976	0.1665413452	0.335861007
1	11434059	11436607	AT1G31860	0.50892292	-	78	83	92.27000046	17.16575086	197.6724976	82.94999695	15.2554996	206.4349937	0.1489033055	0.3097969088	0.6548932493	3027	0.2392711963	0.389277685
1	11436718	11440275	AT1G31870	0.4774938799	+	34	43	93.60499954	16.26549938	177.5300056	75.43000031	14.14249964	199.6160049	0.2099863201	0.3330474556	0.6704671484	621	0.1306616431	0.3044024656
1	11456801	11463896	AT1G31910	0.2294162107	+	251	284	101.2200012	22.06750011	243.3950005	101.4000015	18.08650084	226.1109947	0.06617193199	0.5896357256	0.8433856749	35442.5	0.455600726	0.4859481978
1	11461854	11463857	AT1G31920	0.1007611888	-	59	73	63.18999863	12.97899995	107.2640018	60.90000153	19.21799965	125.6160004	0.1109821221	0.7929372334	0.9373354258	2142	0.4799230991	0.4940573725
1	11464933	11469207	AT1G31930	0.5042416027	+	50	57	99.26000214	15.41849985	225.0449951	84.91999817	19.51199951	191.1619934	0.1814035088	0.3131543128	0.6570002796	1189	0.07072134964	0.2318301346
1	11469481	11470010	AT1G31935	0.6366866477	+	34	37	52.5	18.83925018	102.0340019	60.5	13.52999992	132.9040039	0.2384737679	0.2308412154	0.5780144562	573	0.26147072	0.4021571054
1	11470055	11471481	AT1G31940	0.5012342616	-	71	87	66.12999725	15.8174994	182.5800018	61.47999954	11.87200017	145.0180016	0.1502347418	0.315330325	0.6583347133	2712	0.09437386125	0.2626850418
1	11479762	11482890	AT1G31970	7.463170189	+	234	222	92.88000107	12.11150029	257.5057526	47.22500038	9.743750119	202.8154942	0.2767382767	3.442150149e-08	2.764179691e-06	18171	1.450534551e-08	1.115530143e-06
1	11528384	11531350	AT1G32050	1.353533896	+	255	402	75	17.07349968	209.7175041	68.31000137	14.59799993	193.695747	0.10936494	0.04430636329	0.2576650172	46579	0.02430070201	0.1337412737
1	11532198	11534639	AT1G32060	5.166171029	+	3017	4111	63.70000076	14.85400009	168.6400024	58.24000168	12.69749975	156.3749962	0.05996845734	6.820700364e-06	0.000345214167	5797141	1.238589278e-06	6.819278468e-05
1	11534606	11536437	AT1G32070	0.5842144642	-	176	237	84.01499939	15.52125001	256.7437515	87.44000244	16.74300079	206.9719986	0.09910817031	0.2604866892	0.6090705989	20580	0.4091787464	0.4695994044
1	11537241	11539896	AT1G32080	1.414207703	-	450	702	79.86999893	18.36749949	190.6499989	84.41500092	17.25299997	203.6404984	0.08421652422	0.03852940455	0.2389199709	145350	0.01109970307	0.08655267385
1	11546159	11548016	AT1G32100	0.1387152769	-	52	50	76.93499756	14.90525029	203.6014935	69.59999847	18.86149979	154.9919991	0.1330769231	0.7265821479	0.9138864243	1200.5	0.2537584144	0.3982685334
1	11556743	11558702	AT1G32127	0.2698386785	+	25	23	78.69000244	18.68400002	187.771994	58.61999893	17.01200061	131.0164978	0.2226086957	0.5372313174	0.8112047786	237	0.1510644631	0.3229160321
1	11558754	11561920	AT1G32130	0.5437896088	-	182	149	72.87000275	15.36000066	210.5734978	62.5	11.78199997	191.3389984	0.1073087986	0.285897522	0.6342948944	11990	0.03508365815	0.1621008906
1	11565493	11568645	AT1G32150	0.1055288685	+	32	30	134.8150024	23.10450025	270.9012501	114.3849983	15.46525006	276.6907509	0.1604166667	0.7842799843	0.9351682236	430	0.2428224694	0.3911402471
1	11568653	11570438	AT1G32160	0.195228368	+	193	217	86.31999969	19.25	199.576001	86.51999664	15.77200012	240.5900024	0.07263436881	0.637927952	0.8695816751	20199.5	0.2681948167	0.404793293
1	11575319	11578030	AT1G32170	0.2467491565	+	39	22	90.40000153	18.89550071	139.7880058	79.72499847	12.33224993	226.7049957	0.2016317016	0.5665664368	0.8298156276	377	0.2196142941	0.3756605579
1	11592926	11596056	AT1G32190	0.5373950375	-	46	52	93.83000183	13.72250032	185.5700016	63.81000137	10.44874992	185.6560005	0.1931438127	0.2901382335	0.6388667207	987	0.06887518404	0.2290680454
1	11601670	11605174	AT1G32200	0.3206223037	-	125	184	95.23999786	16.24699955	189.2419983	84.375	13.18300006	224.3974987	0.09608695652	0.4779447509	0.7743807223	10678	0.143269348	0.3165558809
1	11605605	11607866	AT1G32210	2.162173904	-	171	175	58	13.7275002	165.4849968	74.69999695	14.35600023	174.9689987	0.1785463659	0.00688376595	0.08613370501	13112.5	0.02339397025	0.1313843262
1	11607853	11609968	AT1G32220	0.9867118932	+	280	507	61.60500145	9.863250113	157.9045006	67.90000153	12.72900009	193.1535027	0.08979994365	0.1031069896	0.3961231685	65414.5	0.03417614048	0.1595728242
1	11611890	11617419	AT1G32230	3.154556006	+	289	316	108.7200012	26.59199982	232.347998	91.84500122	16.9937501	272.2750053	0.1606587534	0.0007005578345	0.01621434415	38626	0.0005262604689	0.0109587334
1	11625615	11630745	AT1G32240	0.05247395934	-	13	19	97.48000336	21.72099953	245.5380051	98.04000092	22.21299973	216.7349983	0.1983805668	0.8861883587	0.9742736724	121	0.469415657	0.4906576837
1	11640557	11641889	AT1G32260	0.005476486837	-	36	40	73.93500137	9.671250045	180.1537437	69.57499695	14.34999967	146.9032505	0.1	0.9874690969	0.9999976789	709	0.456508898	0.4864798117
1	11653499	11654833	AT1G32310	0.3312523841	+	44	73	58.32500076	11.54750044	120.2944973	58.02999878	10.89200001	142.8839966	0.1578455791	0.4663882666	0.7666764822	1474.5	0.2305264542	0.3834235459
1	11656963	11660471	AT1G32330	0.003962096121	-	21	24	90.91999817	14.08500028	192.8899994	87.15000153	12.67299967	164.7390007	0.125	0.9909184254	0.9999976789	246	0.4502105808	0.4847626337
1	11663007	11666120	AT1G32340	0.8187805118	-	28	25	88.34500122	15.28350015	155.8270065	73.83000183	8.63200016	137.5159988	0.3	0.1517817264	0.4767938663	266	0.06840390191	0.2285108513
1	11672765	11675387	AT1G32360	1.307452483	+	75	126	74.87000275	12.83150005	164.5499939	59.42000008	10.12999976	201.9274998	0.1946031746	0.04926602429	0.2728560426	4020	0.03866735005	0.1705705411
1	11676924	11678692	AT1G32370	0.08108004734	+	48	38	91.21500015	20.91899929	205.7355003	86.31500244	7.713249815	247.5442471	0.1315789474	0.829697827	0.951891468	877	0.3820842518	0.4598107799
1	11681733	11684520	AT1G32380	0.04512977514	+	29	43	112.3199997	23.55199976	217.5609985	93.66999817	17.1729991	306.8984871	0.1323175621	0.9013017719	0.9789454072	614	0.4588493959	0.4867713254
1	11689063	11691588	AT1G32400	0.5062090609	-	342	493	51.61999893	11.09650016	186.3747494	47.91999817	11.76600008	182.4560013	0.06716842817	0.3117388572	0.6557343401	81023.5	0.1693500576	0.3379433092
1	11693798	11695575	AT1G32410	0.5397199628	+	64	124	85.06499863	19.57249932	209.869249	65.00999832	12.43774974	242.3935001	0.1481854839	0.2885891754	0.6370098057	3333	0.03635106913	0.1651133718
1	11711943	11715162	AT1G32440	0.04726410178	+	81	110	85.58999634	15.78999996	203.9199982	87.32999802	22.49850025	221.3660027	0.08237934905	0.8968832189	0.9776807058	4237	0.2822905868	0.413004725
1	11715146	11719988	AT1G32450	0.8803308	-	115	40	69.95999908	16.47600012	196.8295036	57.45499992	15.06150038	173.0460007	0.2086956522	0.1317253011	0.4469251288	2009	0.117426645	0.2903436057
1	11738117	11739326	AT1G32460	3.360193268	+	185	219	74.87000275	16.31200066	163.5299988	51.95999908	12.27099972	163.996505	0.2023694928	0.0004363216188	0.01174432357	15533	2.674270201e-05	0.0009645289671
1	11739303	11740399	AT1G32470	0.2504109805	-	1358	1633	56.68999863	15.71025026	151.8894974	56.97000122	14.30399971	172.1179932	0.02885218077	0.5618094235	0.8271778738	1105634.5	0.4463469302	0.4836600242
1	11742005	11749788	AT1G32490	0.1117098308	-	48	40	106.1199989	16.73849988	309.1917419	112.2050018	21.14124949	222.2207508	0.1375	0.7731970159	0.9307850765	944.5	0.4499843688	0.4846426526
1	11749797	11752190	AT1G32500	0.3725603175	-	147	214	73.87999725	15.90649991	172.1610008	70.35499954	16.31874976	155.7702518	0.09272681035	0.4240720821	0.7381695992	15565	0.433355605	0.4789980014
1	11758210	11759324	AT1G32520	0.08065578279	-	123	126	82.56999969	18.11550074	209.6139938	79.14999771	14.32874978	194.7275028	0.07781649245	0.8305087592	0.9523071012	7491	0.3252135902	0.4339143206
1	11759426	11762635	AT1G32530	1.186493051	-	30	47	93.91500092	34.52375031	190.3855019	114.6399994	32.91800003	237.2715012	0.2957446809	0.06508890255	0.3181127097	568	0.07695798774	0.2407110721
1	11767484	11770049	AT1G32540	0.3375396838	+	78	59	115.2550011	26.09450088	215.398756	82.83000183	13.66949992	209.896994	0.1438504998	0.4596849827	0.7615137023	2124	0.221473748	0.3766058318
1	11771620	11774294	AT1G32550	0.285622692	-	138	219	76.56999969	11.25949965	176.3832504	73.59999847	15.86999984	217.7615028	0.08745284892	0.5180567158	0.7978336897	14690	0.3289382015	0.4361003223
1	11774483	11775442	AT1G32560	0.1259050395	+	19	36	82.80000305	21.74249983	203.5174973	74.15499878	12.60374999	161.5099945	0.1842105263	0.7483331092	0.9211569903	295	0.2052423169	0.3651850993
1	11783542	11785704	AT1G32580	0.1883425102	+	170	215	64.36999893	16.25149961	205.6347477	60.34999847	17.15749979	189.4460007	0.07469220246	0.6481230839	0.8740461147	17247	0.1716608731	0.3391357287
1	11785805	11788286	AT1G32583	0.008734169163	+	19	27	106.3000031	25.1869998	192.8749985	89.08999634	19.48700018	196.5955009	0.134502924	0.9800897129	0.9999976789	243	0.3859008733	0.461421756
1	11795608	11797221	AT1G32610	0.0423787984	-	11	13	59.11000061	19.79750037	110.6125011	65.37999725	21.01999989	134.8919998	0.2167832168	0.9070290602	0.9805043109	64	0.3425344975	0.4428712181
1	11798118	11801407	AT1G32640	0.5511026411	-	104	121	73.44499969	15.16500015	158.62775	67.45999908	12.89999962	159.5599976	0.1300063573	0.2811236345	0.6291320913	5759	0.1370163966	0.310449466
1	11820871	11821824	AT1G32690	0.2354864723	-	48	46	76.64500046	24.78774934	166.269001	79.06499863	22.10750031	183.4587479	0.1557971014	0.5814515435	0.8396643774	1047	0.3345643506	0.438963633
1	11827358	11829933	AT1G32700	1.675637913	+	261	189	75.19999695	12.29500008	192.7900009	63.29999924	11.3170002	207.5320053	0.1423097975	0.02110386922	0.1741878132	21295	0.00667487921	0.06331234309
1	11840909	11843308	AT1G32730	0.3017517634	+	18	27	65.70499992	33.579249	189.2297482	83.80999756	22.89749908	150.3465004	0.2407407407	0.4991697243	0.787187672	215	0.2620141044	0.4023215232
1	11858079	11859468	AT1G32760	0.3597711664	+	12	15	59.33500099	14.14474969	196.9525023	37.84000015	7.57099998	111.1224972	0.3166666667	0.4367458969	0.7456996349	68	0.1470677558	0.3194822449
1	11874507	11877549	AT1G32790	0.2002887084	-	309	350	74.26999664	13.69399967	203.8919998	76.77999878	14.32324986	200.0617554	0.05780859917	0.6305380388	0.8664421007	54008.5	0.4892054025	0.4975579403
1	11881310	11886015	AT1G32810	1.534120005	+	43	45	98.88999939	18.31300087	166.2350067	73.25	14.12299957	197.9960022	0.3007751938	0.0292334448	0.2081862421	732	0.02490123537	0.1352377805
1	11911630	11913947	AT1G32870	0.05485534029	+	28	27	74.20000076	17.95200076	192.0437492	73.16999817	15.45549965	177.7084984	0.1521164021	0.8813423916	0.9728032858	351	0.3277441933	0.4353848719
1	11920389	11923866	AT1G32900	1.588887775	-	392	450	72.7349968	12.33574986	204.2440052	72.90499878	9.246999979	202.6172508	0.1010204082	0.02576986983	0.1955953305	81243	0.02406928801	0.132943933
1	11928756	11929993	AT1G32920	0.2360524052	+	247	210	71.26000214	14.86749992	154.8490051	67.16999817	13.7287497	142.9527485	0.07212261423	0.5806943424	0.8392502982	25262.5	0.3164655557	0.4311495163
1	11931148	11931801	AT1G32928	0.2121812592	+	19	36	76.56999969	23.24850082	109.8055004	69.89999771	17.87124968	148.8987484	0.2061403509	0.613505896	0.8571952747	305	0.2591219817	0.4012718947
1	11937182	11941116	AT1G32940	1.286160682	+	44	14	100.1699982	23.18750086	298.2140079	126.8250046	80.16775074	157.4122486	0.3961038961	0.05174153613	0.2808301821	191	0.0171342002	0.110551513
1	11955655	11957402	AT1G32990	0.5952293973	+	639	750	75	13.5215004	157.0269997	71.04499817	14.48775008	175.283746	0.05429107981	0.2539630901	0.6016876145	231729	0.1446411588	0.317816968
1	11966422	11967843	AT1G33040	0.3043026818	+	128	184	55.32999992	11.94300005	133.069252	59.99499893	12.88875	165.773251	0.09408967391	0.4962463417	0.7864007572	10940.5	0.1433594003	0.3165798972
1	11967782	11971532	AT1G33050	0.4400388782	-	103	107	108.7600021	15.12199998	240.1940048	89.73999786	13.37550015	264.05	0.1249432901	0.3630455534	0.6919573981	5172	0.221299001	0.3766058318
1	11971307	11972580	AT1G33055	0.4515303266	-	16	19	77.09999847	21.11374998	102.2974997	46.68000031	15.65150013	121.3204994	0.2993421053	0.3535653309	0.6860328507	117	0.1266419932	0.3006152606
1	11975306	11978622	AT1G33060	0.856832657	-	56	40	106.5300026	18.28624964	215.8924999	102.6200027	14.23675022	252.1597462	0.2321428571	0.1390488313	0.4592176596	998	0.1832799005	0.348641978
1	12002237	12003005	AT1G33102	0.3448444298	-	25	31	55.11000061	11.76800003	146.6360001	58.54999924	16.5474999	177.3000031	0.2219354839	0.4520178343	0.7570087824	327	0.1613553571	0.3319186531
1	12004853	12008852	AT1G33110	0.2699244628	+	199	128	103.8000031	21.64850082	261.2315109	99.11000061	20.17075067	262.1622467	0.08978486181	0.5371252109	0.8112047786	12685.5	0.4761085476	0.4931910046
1	12010878	12012547	AT1G33120	5.307153076	+	1164	1859	71.99499893	15.4275001	168.6352467	62.38999939	14.12349997	169.8919975	0.09453591611	4.930000054e-06	0.0002568370996	974544	2.122817941e-06	0.0001090288296
1	12023224	12024783	AT1G33140	5.573759458	+	1518	2442	65.66500092	14.70475006	170.2467453	57.57500076	14.3815001	165.2579945	0.08465975857	2.668336162e-06	0.0001509115413	1688538	1.207105639e-06	6.671209302e-05
1	12026935	12030539	AT1G33170	0.4414168056	+	40	50	64.38500214	20.20824909	165.5095013	73.37000275	17.19399929	152.4387556	0.19	0.3618955096	0.6913867781	980.5	0.4386941365	0.480786449
1	12046378	12050095	AT1G33230	0.4663495369	+	82	89	110.3100014	19.12024994	190.9537567	89.91999817	14.9920002	194.1160034	0.1407234859	0.341704315	0.6789146655	3226.5	0.09598380834	0.2645287551
1	12051360	12054753	AT1G33240	0.2613612586	-	115	154	76.87000275	18.18699942	178.1044975	70.47000122	16.53374929	176.9504955	0.09672501412	0.5478210821	0.8184911579	8203	0.1510169209	0.3229160321
1	12057197	12059792	AT1G33250	1.149447139	-	52	77	90.30999756	18.63675022	218.8402451	67.66999817	13.88799982	185.3680054	0.2262737263	0.07088475796	0.3315167161	1720	0.08825059502	0.2558734699
1	12066594	12068101	AT1G33265	1.253286094	+	33	23	80.16000366	17.23200035	145.6459961	100.9599991	29.18550043	209.1605003	0.34914361	0.05581024208	0.2929659204	266	0.02992061686	0.1485073665
1	12068062	12070455	AT1G33270	0.8081375438	-	45	61	109.8399963	37.96799927	190.7010025	81	19.0449996	211.2699966	0.2160291439	0.1555472926	0.482063944	1072	0.02758345436	0.1431365616
1	12074098	12076289	AT1G33290	0.01007960068	+	69	75	88.51999664	22.78600025	177.0190002	89.75	17.92050066	213.3895042	0.07768115942	0.9770581222	0.9999976789	2555	0.4490871438	0.4844140521
1	12084913	12086883	AT1G33330	1.014678905	+	39	62	82.91999817	14.21949978	188.902504	59.65499878	19.67174997	188.5245007	0.2444168734	0.09667653913	0.3849845195	1010	0.08308810183	0.2485143367
1	12091779	12096486	AT1G33360	0.04462341519	+	19	20	116.0699997	21.47000084	212.8009995	125.7150002	31.17825036	229.280748	0.1736842105	0.9023532457	0.9789784516	174	0.3315952693	0.4377997311
1	12099481	12104680	AT1G33390	0.494530938	-	11	26	93.29000092	20.87250042	229.6400032	82.54999924	23.31999946	155.0987473	0.3251748252	0.3202351959	0.661751985	123	0.2585043385	0.4007725719
1	12104707	12109531	AT1G33400	0.06460870692	-	16	11	129.9049988	43.46750164	375.3962479	130.5	23.52750015	199.9675064	0.2215909091	0.8617698447	0.9644155777	82	0.3930397499	0.4639802658
1	12109560	12118861	AT1G33410	0.4519423741	-	31	42	120.9499969	14.56750011	242.8249969	79.375	16.90149961	351.9355003	0.212749616	0.3532300363	0.6856676834	638	0.4445268837	0.4829257371
1	12144439	12147208	AT1G33470	1.351622548	+	133	155	94.87999725	19.12899952	210.0710037	72.08000183	11.60699983	236.547506	0.1605141887	0.04450178708	0.2583859011	8675.5	0.01029385512	0.08290634044
1	12150673	12152460	AT1G33490	0.003593224992	-	80	85	77.85000229	12.25550044	199.2885014	80.80999756	18.33099957	216.0069946	0.06617647059	0.9917604266	0.9999976789	3318	0.3952237803	0.4646908795
1	12157053	12159125	AT1G33520	0.08905182573	-	63	75	57.68000031	15.86649985	128.896994	59.15000153	10.22300029	223.4589996	0.106031746	0.8146070686	0.9452589607	2326	0.4388518082	0.480786449
1	12177672	12179628	AT1G33590	0.3661452016	+	178	151	56.375	13.83949964	168.0419971	51.72999954	13.39000034	132.6300011	0.09524518193	0.4303826927	0.7430356954	12510	0.1400746612	0.3128956573
1	12180482	12184528	AT1G33600	0.3677094754	+	124	128	61.32999992	18.21174989	160.8307533	58.15000153	11.14649994	150.0614986	0.1083669355	0.4288352971	0.7419819468	7663.5	0.3191056892	0.4324247338
1	12188677	12190461	AT1G33610	0.2269107774	+	23	23	63.11000061	15.47849994	126.5539982	51.77000046	19.78999987	113.6900017	0.2173913043	0.5930471493	0.8454703548	222	0.1780803278	0.344706028
1	12203944	12208698	AT1G33680	1.218453996	+	116	102	87.66500092	16.48500025	208.3037529	66.36500168	11.64200034	160.9527451	0.1763015551	0.06047084033	0.3063588931	4670	0.003677823097	0.04335826883
1	12244559	12246231	AT1G33780	0.2718654212	-	103	79	82.93000031	17.07699976	176.9659996	92.69999695	12.66850028	187.2604935	0.1181024948	0.5347300354	0.8097479165	3872	0.2889679007	0.4172391859
1	12256473	12260638	AT1G33790	0.03557277357	+	28	37	79.84499741	10.41299994	164.8912491	86.45999908	21.09800014	164.7250061	0.1332046332	0.9213554867	0.9862215185	471	0.2689421026	0.4051273148
1	12261164	12262750	AT1G33800	1.278286855	+	20	11	74.03499985	21.38300035	194.3305	40.06999969	14.17499971	98.69750023	0.4772727273	0.05268817368	0.2841648353	59	0.01853691378	0.1165012403
1	12264941	12266920	AT1G33810	0.196288915	+	256	363	61.88500023	11.68000007	158.864994	58.33000183	12.527	165.6680054	0.06013257576	0.6363720327	0.8689213241	45473.5	0.325702577	0.4341605794
1	12267807	12269913	AT1G33811	1.151777758	+	152	199	55.63500023	11.11224997	185.5540012	44.15000153	11.45550003	194.3039978	0.1373644538	0.0705053775	0.3307851733	13051	0.01389572747	0.09788990665
1	12349303	12351318	AT1G33970	0.1816333727	-	108	114	89.91500092	20.45274982	222.7270069	89.97000122	13.4297497	190.0310059	0.09649122807	0.6582132604	0.8782823592	5862.5	0.2700869249	0.4056259683
1	12351565	12355173	AT1G33980	0.3660771139	+	99	102	92.37000275	18.32350025	229.945005	94.68500137	13.63875029	246.4375038	0.1209150327	0.4304501725	0.7430356954	4976.5	0.4306834147	0.4777308547
1	12355556	12358031	AT1G33990	0.4938455824	+	206	226	71.29000092	11.12500012	212.8237572	66.25999832	13.51250029	191.2649994	0.09090128018	0.3207409547	0.661751985	22296.5	0.2245603989	0.3787940577
1	12357909	12358966	AT1G34000	0.3781512782	-	655	1116	59.25	11.76950006	167.5650002	60.40999985	12.15874982	164.6624966	0.04312703494	0.4186477117	0.7344893646	357948.5	0.2339714488	0.3861509636
1	12359453	12361313	AT1G34010	2.381360775	-	41	59	80.54000092	18.43000031	132.0399933	55.24000168	13.92499976	152.7910027	0.3472509301	0.004155652512	0.06150958173	787	0.001550734034	0.02382655306
1	12366809	12370014	AT1G34020	1.644100034	+	45	47	96.08000183	36.77400093	181.8069977	74.87999725	16.84499931	213.9440041	0.3030732861	0.02269342078	0.1816903594	792	0.01923298172	0.1193643848
1	12370064	12371554	AT1G34030	1.755847282	-	505	741	62.31000137	15.37799988	176.3640045	56.68000031	12.21500015	178.6749954	0.08815488836	0.01754497357	0.1570296742	173312.5	0.01350691516	0.09680621889
1	12426699	12429714	AT1G34120	0.3056922403	+	18	16	107.1799965	19.57849991	200.6435013	105.954998	25.85375047	197.4762535	0.2708333333	0.4946611009	0.7850091824	131	0.333128406	0.4384572836
1	12429845	12433236	AT1G34130	1.019234459	+	59	78	72.06999969	29.90750036	166.2874954	90.13999939	12.592	217.7632572	0.2077357671	0.09566774574	0.3832774764	2050	0.1381003726	0.311162387
1	12435881	12439499	AT1G34150	0.256496455	+	21	17	88.58999634	26.76000023	193.5550003	63.43999863	29.05399933	216.3499969	0.2464985994	0.553992066	0.8225313568	174	0.4532591051	0.4853547012
1	12451404	12454542	AT1G34190	0.7286246221	+	148	131	67.83499908	14.68449974	142.5490055	66.95999908	10.88249969	158.9175034	0.1285331133	0.1867993574	0.5271070976	9257.5	0.2584167951	0.4007725719
1	12455652	12457547	AT1G34200	0.02748022525	+	42	49	62.96500015	14.73074956	157.0390022	62.81999969	17.5659996	157.8200012	0.1088435374	0.9386847769	0.9918423972	1001	0.4133516659	0.4712200032
1	12458563	12462905	AT1G34210	0.2078683026	+	48	32	127.5099983	52.18649979	304.9544891	131.9249954	25.0327498	261.0150013	0.1666666667	0.6196289456	0.8608552029	706	0.2729261286	0.4072318985
1	12462848	12466089	AT1G34220	0.0002474243053	-	76	64	72.61999893	13.32999992	159.2262459	79.6400032	14.79399979	153.1782547	0.06003289474	0.9994304467	0.9999976789	2383	0.4196168259	0.4736770297
1	12485317	12492207	AT1G34260	0.9223685799	+	21	15	93.84999847	13.92999983	136.7249985	63.38999939	16.58349943	217.8724945	0.380952381	0.1195725304	0.4271129315	111	0.06996922806	0.230361023
1	12492320	12494584	AT1G34270	0.5838505645	-	14	25	90.5	13.96300027	106.5769976	90.26000214	18.96799927	180.9319946	0.32	0.260705045	0.6090705989	153	0.2645254312	0.4031625057
1	12503359	12506172	AT1G34300	0.2181797085	+	53	40	75.58000183	17.07800026	169.7189941	64.52500153	11.95975001	158.2662506	0.1551886792	0.6050904401	0.8523055344	915	0.1310774612	0.3048825249
1	12520058	12524377	AT1G34320	0.1852451826	+	65	74	124.9000015	28.79799919	256.421991	133.2700043	17.63575044	268.6067596	0.122037422	0.6527619293	0.8750248679	2314.5	0.3520006502	0.4469733354
1	12530814	12534306	AT1G34340	3.288379826	+	27	31	155.8800049	41.24699974	210.4860016	175.6799927	42.2650013	285.4124985	0.5149342891	0.0005147782321	0.01305811798	217	0.0008643490519	0.01576580944
1	12534425	12536162	AT1G34350	0.234530964	+	27	55	81.12999725	16.49449992	238.4964958	62.43999863	14.22950029	146.1440044	0.1764309764	0.5827322261	0.8402313031	613	0.1015352039	0.2711577119
1	12542795	12546244	AT1G34360	1.236689068	+	34	23	112.0099983	38.94350052	183.8949982	76.55999756	14.88150053	160.8765045	0.3452685422	0.05798436849	0.2989722583	245	0.008974657733	0.07650829921
1	12550338	12552629	AT1G34370	0.09250002162	+	203	171	71.69999695	14.81949997	176.2545021	70.30000305	11.6099999	228.5974998	0.06547979143	0.8081648889	0.9427462532	17341	0.4942546647	0.4988883022
1	12582121	12582721	AT1G34418	3.585319731	+	258	229	90.33499908	17.40500002	191.9309963	72.12000275	12.32000027	178.3070007	0.1898040012	0.0002598246007	0.007950632781	23782	0.0001015886879	0.002823310858
1	12587725	12590223	AT1G34430	0.6498747825	-	220	291	61.47000122	13.54950018	192.6197479	68.38999939	13.92250013	201.1724968	0.09237738207	0.2239366708	0.5695889068	28732	0.02367915747	0.1318912539
1	12604160	12607033	AT1G34470	0.03886166163	+	36	43	125.1499977	35.97249937	222.2512493	116.7099991	19.51749992	249.8315041	0.1220930233	0.9144044657	0.9826336944	707	0.2563598491	0.3998779964
1	12646673	12652646	AT1G34550	0.1579226932	-	74	90	79.5	12.69299986	182.3162567	76.33499908	13.41149986	200.8072472	0.109009009	0.6951480468	0.9001269258	3194.5	0.3277575438	0.4353848719
1	12654926	12656605	AT1G34570	0.8737513473	-	40	37	114.7200012	15.67774978	232.9035023	100.5400009	18.72799921	183.0160034	0.2567567568	0.1337360995	0.4512196395	597	0.07312966017	0.2352274118
1	12685175	12687641	AT1G34630	0.05436929655	+	28	13	72.21999741	8.587749791	206.0015022	88.58999634	11.93299971	211.5189972	0.1868131868	0.8823293043	0.9730391835	165	0.3219425118	0.4332683802
1	12687551	12688543	AT1G34640	1.617932309	-	36	51	64.93499756	14.03499997	213.2049999	98.59999847	15.36500049	245.4874954	0.3137254902	0.02410281079	0.1881494924	745	0.06855576696	0.228650315
1	12735999	12738196	AT1G34750	0.1838580617	-	42	23	91.45999908	24.77424965	175.3499992	70.91999817	20.87449999	165.9800018	0.1832298137	0.6548501605	0.8764459275	393	0.1097474943	0.2806208826
1	12743721	12745748	AT1G34760	0.2028562743	-	57	80	72.80999756	23.70200005	227.078006	71.81500244	20.3875001	191.7485004	0.1269736842	0.626821271	0.8649259393	2107	0.225640149	0.3795401486
1	12746404	12748617	AT1G34770	0.05540821339	+	16	23	71.65499878	19.48499966	195.776247	49.24000168	9.442000008	134.4170029	0.1820652174	0.8802211237	0.9723897726	154	0.199814403	0.3608725582
1	12748570	12750506	AT1G34780	0.1259245326	-	48	98	87.47499847	16.38874993	193.1410065	82.56000137	11.54875004	220.894495	0.1164965986	0.7482995213	0.9211569903	2245	0.3286450842	0.4359320184
1	12751155	12752905	AT1G34844	0.4169917128	+	13	22	102.8799973	47.88100014	179.8449997	124.8899994	47.78925018	315.8020111	0.3006993007	0.3828320485	0.7081328738	110	0.1336004373	0.3068714216
1	12842157	12845455	AT1G35115	0.4863026993	+	45	65	115.8000031	30.39799938	248.0409958	100.8799973	29.91200066	286.3340027	0.1794871795	0.3263602827	0.665401418	1271	0.122784343	0.296306948
1	12851982	12853235	AT1G35140	1.031248614	+	27	24	63.06999969	13.06200008	175.3195023	35.03999901	9.196750236	113.6490005	0.3333333333	0.09305750107	0.3780298429	233	0.04382839296	0.1819091067
1	12867080	12868890	AT1G35160	1.240861727	+	312	331	74.66999817	15.31050007	190.6969963	64.30000305	13.28000021	181.2849998	0.1040746766	0.0574299281	0.2972822524	47083.5	0.02658333042	0.1400466501
1	12877106	12878835	AT1G35180	0.3471043809	-	15	31	47.15999985	17.65100036	102.6390003	69.62000275	11.54750025	165.4400063	0.2580645161	0.4496717651	0.7558568737	197	0.2060706976	0.3658082058
1	12890403	12892955	AT1G35190	2.482524592	+	61	70	95.66999817	20.80000019	214.2300034	65.43499756	14.6429996	172.0505035	0.306088993	0.003292118114	0.05156350946	1510	0.001978788741	0.02844875801
1	12908847	12914858	AT1G35220	1.230780964	+	35	20	123.0400009	26.39700031	201.0230011	76.59500122	20.98774986	198.1904964	0.3571428571	0.05877857272	0.3010382503	229	0.01750205657	0.1122649568
1	12936848	12937787	AT1G35260	0.0159299803	-	31	17	60.61999893	10.80249977	143.5999985	61.83000183	12.84799995	192.7	0.1442125237	0.9639844308	0.9990819787	256	0.4400278381	0.4809237256
1	12958840	12962853	AT1G35320	0.5057070164	-	35	23	96.15000153	42.625	233.0295059	83.36000061	11.90749953	214.255999	0.248447205	0.3120994358	0.6559232649	336	0.1470695357	0.3194822449
1	12977667	12979947	AT1G35340	0.009070282874	+	85	91	129.8600006	30.37099991	235.6060059	125.1200027	17.87749982	248.1850014	0.06968325792	0.9793314851	0.9999976789	3661	0.2709722048	0.4060355294
1	12980688	12984740	AT1G35350	0.09008187167	-	36	32	85.52499771	23.5775001	193.2687511	75.43999863	13.81374967	164.911998	0.1493055556	0.8126772987	0.944301266	516	0.2323693085	0.3848552392
1	13026205	13027691	AT1G35420	1.65073281	+	218	195	90.55500031	20.75674934	190.9195011	80	16.84099994	194.3440048	0.1458715596	0.02234946799	0.1806960274	19115	0.03864114391	0.1705066869
1	13030552	13031375	AT1G35430	0.3539063935	-	54	53	64.96500015	7.968250012	163.8834988	54.86999893	10.05300035	131.4449982	0.1628232006	0.4426837768	0.7493197503	1258.5	0.1419272838	0.3153408095
1	13039659	13042159	AT1G35460	0.01002831808	+	29	45	97.05999756	30.00400124	223.3689972	100.5299988	17.92199917	193.5459991	0.1095785441	0.9771735025	0.9999976789	639	0.4427717536	0.4821745026
1	13051156	13055093	AT1G35470	0.2622477776	-	47	45	79.84999847	27.76050043	189.1635048	69.63999939	20.4489994	226.272995	0.1617021277	0.5467039634	0.8178614768	908.5	0.1230439232	0.2966707782
1	13071164	13074984	AT1G35510	0.04102338366	+	42	50	122.0550003	15.16875036	233.1235065	109.6599998	18.08499985	217.5575043	0.1142857143	0.9098642816	0.9818165197	1010	0.3784224611	0.4584788258
1	13078415	13079773	AT1G35516	3.256767816	+	306	193	84.70500183	21.37375021	259.0299911	107.7699966	19.11799965	288.9420105	0.1838362288	0.0005536460217	0.01377952898	26097.5	0.01436422266	0.09973522032
1	13115825	13117235	AT1G35560	1.036385178	-	69	75	60.5	9.861000347	147.512999	47.95999908	19.1284997	172.319001	0.2023188406	0.09196335816	0.3754739918	2263.5	0.09788812282	0.2669012724
1	13122081	13125328	AT1G35580	1.464122947	-	339	459	66.80999756	15.4585001	181.2019989	59.68000031	13.227	166.9584953	0.1011625889	0.0343460702	0.2274691174	69240	0.003913911509	0.04470678165
1	13145642	13146693	AT1G35612	0.1067813144	+	83	64	140.5	27.8265008	277.3300079	146.2300034	32.22874985	323.004245	0.1067394578	0.7820214863	0.9350166091	2610	0.4294543654	0.4770803425
1	13156345	13158467	AT1G35620	1.819141004	+	93	187	86.12999725	16.66599989	170.4669998	67	16.86349964	188.393502	0.1949284112	0.01516557899	0.1444506492	7046.5	0.004893897744	0.05121152175
1	13205344	13208289	AT1G35670	2.264670209	+	39	38	108.9199982	17.68299956	268.5695007	72.24000168	9.914999938	171.218494	0.379217274	0.005436630171	0.0743381181	513	0.01022651869	0.08253328661
1	13208682	13210428	AT1G35680	2.132755564	+	1225	1467	70.87999725	12.58000011	166.9360016	73.80000305	12.44950013	174.5550011	0.06447699734	0.00736621577	0.08982210253	875050	0.1210920664	0.2948682265
1	13225167	13227239	AT1G35720	0.2752594378	+	596	410	59.96500015	17.57874942	149.938755	56.98999977	17.85949926	151.9837433	0.05144868227	0.5305674004	0.8071799419	121345.5	0.4269387061	0.4763205858
1	13277258	13280387	AT1G35780	0.3032364505	-	48	35	85.30000305	14.29850047	217.3565037	73.04000092	8.671499777	251.9070015	0.1785714286	0.497466167	0.7864007572	782.5	0.2995754595	0.422144659
1	13450088	13453683	AT1G36050	0.805162965	+	65	117	84.76999664	13.62399979	211.5319977	68.70999908	13.65799961	194.1919998	0.1709401709	0.1566163272	0.483008649	3220.5	0.04386286606	0.1819482757
1	13466693	13470936	AT1G36070	0.2390207339	-	22	38	139.7450027	17.83399982	235.0987476	159.0649948	28.66700025	253.6527496	0.2009569378	0.5767389283	0.8367158801	370	0.233109326	0.3855973659
1	13533167	13544015	AT1G36160	2.050352455	+	127	102	113	21.96099911	254.1840073	88.84999847	14.38100016	263.7670128	0.2149143122	0.008905279295	0.1020211541	4853.5	0.0005625994566	0.01143689944
1	13640507	13643126	AT1G36280	0.1942337147	+	35	33	71.30999756	20.64799976	200.348497	85.41000366	17.74199944	160.4660004	0.174025974	0.6393906561	0.8698245763	527	0.2697586404	0.4056259683
1	13669424	13671203	AT1G36310	0.4375362515	+	77	117	65.55999756	13.47999983	145.0489975	57.38000107	16.08300076	200.3069962	0.1324231324	0.3651436467	0.6931120022	4113	0.1534119346	0.3251777909
1	13671773	13674205	AT1G36320	1.983411012	+	315	351	57.31000137	13.84599967	169.7700005	69.47000122	16.5825007	175.7274971	0.1246235246	0.01038936461	0.1126365989	50241.5	0.02101320485	0.1251236921
1	13696041	13698739	AT1G36370	0.3294530632	-	71	43	88.68000031	36.46250057	233.2850037	108.5999985	24.45300055	216.885498	0.1595152309	0.4683245633	0.7684346392	1394.5	0.2210104607	0.3763780957
1	13700764	13701632	AT1G36380	0.9853451748	+	79	84	79.04000092	24.31250019	165.5614975	62.65999985	13.46774988	166.1449986	0.1867088608	0.1034319768	0.3967758731	2640.5	0.01228674621	0.09200816908
1	13701400	13703573	AT1G36390	0.09344796073	-	93	96	90	16.45700073	210.6579971	89.24000168	16.30250001	201.7499962	0.09139784946	0.8064028227	0.9422545079	4258	0.2923358955	0.4187080796
1	13898209	13900831	AT1G36730	0.3780645292	-	364	316	83.64500046	27.09199991	158.8057434	79.11000061	20.17999983	194.9375019	0.06711642788	0.4187313437	0.7344893646	56052	0.2839147257	0.4141485345
1	14003818	14005502	AT1G36940	0.01867921625	+	41	24	67.41999817	12.11999989	154	65.04500008	7.905500162	129.2215008	0.1260162602	0.9579013465	0.9973688101	471	0.3902516304	0.4627349655
1	14024633	14027040	AT1G36980	0.3968395664	+	461	527	52.65000153	11.76000023	168.3649979	48.20999908	10.95300012	169.5920021	0.05655554504	0.4010148299	0.721122145	116526.5	0.1344846884	0.3078322749
1	14027221	14030500	AT1G36990	0.1186401675	-	51	61	73.80999756	28.48500013	188.4449959	73.81999969	19.46000004	136	0.1237544198	0.7609565025	0.9265730723	1475	0.3201054748	0.4328388554
1	14158451	14161938	AT1G37130	12.18575145	+	2185	2066	74.58000183	19.16200066	160.4160004	64.81000137	13	164.2012539	0.1159128618	6.520014371e-13	1.089292056e-10	1923399.5	3.595883448e-17	7.68620087e-15
1	14289532	14292098	AT1G38065	0.4640300575	-	19	31	116.2399979	41.13499947	207.3899986	82.40000153	18.51000071	157.3350067	0.2614601019	0.3435341711	0.6800188066	208	0.04281783102	0.1798720156
1	14292995	14296253	AT1G38131	0.5706720808	-	23	40	102.2799988	29.38549919	204.8099983	84.60000229	18.40850005	164.2890049	0.252173913	0.2687372812	0.6167120886	362	0.08197473779	0.247156753
1	15603567	15607966	AT1G41830	0.5950369549	-	117	124	69.37000275	8.065999842	212.7149994	56.21999931	14.18949969	212.4462559	0.1286186931	0.2540756499	0.6018561883	6640	0.128352939	0.3016748999
1	15650634	15652542	AT1G41880	2.403292331	-	774	1162	64.52999878	12.72599978	165.8722553	56.36499977	12.14650033	171.0784966	0.0813931251	0.003951005817	0.05926508725	427650.5	0.03366533724	0.1584603876
1	15891280	15894576	AT1G42430	0.7114805261	+	33	64	82.23000336	20.2420002	199.2759979	73.31999969	20.29299989	236.0767563	0.2244318182	0.1943208824	0.5365567489	935	0.1794331374	0.3459043449
1	15895196	15900105	AT1G42440	0.7439269057	-	67	74	79.68000031	18.84999943	177.0260017	74.83499908	19.65175066	249.4990005	0.1807180315	0.1803321225	0.5182141954	2383	0.3466897513	0.4440872784
1	15926675	15935529	AT1G42470	0.8873271157	+	21	30	156.6199951	39.35499954	246.0650024	116.7799988	29.42025046	278.655748	0.319047619	0.1296202588	0.443928007	219	0.0337918797	0.1586450166
1	15936155	15938974	AT1G42480	0.2321871306	+	57	68	62.31000137	12.63000031	178.3939972	61.5549984	9.756250167	180.6205017	0.1357069143	0.5858856613	0.8416118209	1847	0.3268590824	0.4349303751
1	15973053	15976813	AT1G42540	0.001288909309	+	27	49	92.48000336	23.19599991	151.3350021	95.43000031	18.52400017	164.228006	0.09297052154	0.9970365763	0.9999976789	640	0.4098537689	0.4699238409
1	15976804	15979952	AT1G42550	1.090064981	+	72	130	55.39499855	7.501750016	113.4865026	58.76499939	5.743999958	167.5649979	0.1822649573	0.08127089052	0.3547364545	4383.5	0.2284777379	0.3819002217
1	16125742	16127298	AT1G42960	4.248580576	+	474	706	67.90999985	12.79475024	159.9422527	54.93000031	11.37124979	163.0837479	0.134889614	5.641822576e-05	0.002270597721	142739.5	9.201800753e-06	0.0003888028312
1	16127352	16129895	AT1G42970	4.351702662	+	4190	5718	67.29000092	13.58900039	174.0509956	63.47999954	12.59000015	181.0865063	0.04694967364	4.449357871e-05	0.001847754762	11441841.5	6.659491285e-05	0.002008209665
1	16135722	16137463	AT1G42990	2.499968331	-	89	106	89.30000305	25.41999931	197.1519958	66.1099968	16.08875036	192.7000008	0.2532329871	0.003162508265	0.05034727014	3565	0.001676078914	0.0252978266
1	16228188	16231254	AT1G43130	0.1412820152	-	77	74	84.62000275	13.98999996	176.7869949	64.49500084	12.33375003	227.9672489	0.1103896104	0.7223006153	0.9120036833	2697	0.2864027431	0.4157205419
1	16266552	16268945	AT1G43170	9.437623799	+	1613	2627	60.5	12.10299997	159.8089996	50.74000168	10.8920001	160.4619965	0.1055078987	3.650700466e-10	4.050605441e-08	1900172	8.195186e-09	6.509127241e-07
1	16275107	16278742	AT1G43190	1.581052956	-	163	157	89.62999725	20.62649918	208.9915009	73.70999908	13.31499977	191.6389999	0.1622054629	0.02623898577	0.1970985419	10374.5	0.001719532913	0.02571338569
1	16308509	16311094	AT1G43245	0.2402439026	-	22	12	70.43500137	21.40625	197.9654968	108.5300026	19.34450011	152.3499973	0.2651515152	0.5751168573	0.8358319244	127	0.4355864866	0.4799978081
1	16397978	16399880	AT1G43560	0.4204153548	-	324	431	60.31999969	12.73175004	143.3382549	60.61999893	12.03999996	169.1100044	0.06624702816	0.3798259609	0.7062293305	67508	0.217698855	0.3745698747
1	16410371	16412736	AT1G43580	0.01554973659	-	62	64	66.03000069	15.43649986	164.214246	63.42000008	13.84599981	188.0582489	0.08669354839	0.9648288107	0.9990819787	1916.5	0.3718535078	0.4555322997
1	16425411	16430287	AT1G43620	1.087570452	-	28	18	111.6299973	10.80900021	210.0074936	75.73500061	18.5254998	260.81875	0.3650793651	0.08173904292	0.3558182057	209	0.1693929473	0.3379433092
1	16467297	16470500	AT1G43670	0.9432407547	+	275	584	72.90000153	10.83449998	256.4589973	78.70500183	14.82499976	236.4377495	0.08671855542	0.1139617856	0.4159805509	77291	0.1875971425	0.3513820189
1	16478158	16482859	AT1G43690	1.016483597	+	114	125	91.24499893	19.11524944	195.0947548	77.58000183	16.0890007	231.1649979	0.1567719298	0.0962756374	0.3842362849	6103.5	0.02790543841	0.1437298183
1	16484230	16486327	AT1G43700	0.08807619111	+	169	182	50.36999893	12.73599968	181.3719971	50.64500046	13.45274994	159.2804935	0.06677937447	0.8164391256	0.9463271683	14776	0.2629412105	0.4028018014
1	16486229	16488462	AT1G43710	0.2213045304	-	276	249	62.43499947	12.92500007	166.2099934	63.18000031	12.91999969	174.8180054	0.0661777545	0.6007523379	0.8498233802	33894.5	0.3939390368	0.4642750264
1	16575758	16576541	AT1G43790	0.3376795685	+	75	58	43.75	12.49550037	103.6555004	47.87999916	13.26424987	139.4365055	0.1457471264	0.4595369437	0.7614420287	1955	0.1596424659	0.3305322025
1	16616987	16622049	AT1G43850	0.06773476984	+	89	104	67.04000092	19.25999985	153.6119934	72.84500122	20.09374952	173.6239975	0.08589023336	0.8555890745	0.9628539244	4443.5	0.317158452	0.4314225141
1	16620768	16624504	AT1G43860	0.9602807894	-	50	84	75.38999939	18.29849982	146.535001	57.65999985	13.69349999	136.9919998	0.21	0.1095769507	0.4079615281	1791.5	0.07825076415	0.2423039746
1	16646695	16648648	AT1G43890	0.7529880884	+	183	229	68.06999969	13.88800011	166.081501	69.83000183	13.25900002	187.1920029	0.107810151	0.1766086259	0.5114577362	20663.5	0.4047552101	0.4682131712
1	16654029	16655928	AT1G43900	0.04467166227	+	51	90	83.62000275	22.54750013	183.6050034	86.43500137	13.37725015	192.5782562	0.09738562092	0.9022530062	0.9789784516	2226	0.3844089989	0.4606252926
1	16708003	16709713	AT1G44000	0.05463938341	-	209	360	81.97000122	19.4079998	180.2060059	83.24000168	18.10500083	200.1734993	0.05042530569	0.8817807561	0.9728032858	37594.5	0.4947244675	0.4989761661
1	16764391	16767685	AT1G44100	0.02039130109	-	77	33	70.83999634	17.67200012	247.1240067	72.04000092	17.38400002	201.9060028	0.1038961039	0.9541325213	0.996000876	1193.5	0.3088938814	0.4267033422
1	16774764	16777352	AT1G44110	0.07779404324	-	22	14	58.61499977	21.30999947	195.6077522	64.99500084	24.54850011	182.0537537	0.2012987013	0.8359993827	0.9547747265	151	0.4676692182	0.4900210558
1	16780240	16786828	AT1G44125	0.1302921002	-	13	14	127.1900024	53.95400047	209.0820053	132.9400024	76.70500126	244.8079979	0.2472527473	0.7408118144	0.9179624656	79	0.2884048396	0.4166755031
1	16796399	16800321	AT1G44170	0.4229015021	-	60	39	75.50999832	20.06950016	183.8940006	91.93000031	17.63899927	289.6090042	0.1820512821	0.3776578339	0.7045638065	986	0.09441119079	0.2626850418
1	16834209	16838562	AT1G44350	0.7820818295	-	58	144	78.14500046	21.93600087	163.0234993	58.15500069	14.53049991	201.8399982	0.1700191571	0.1651650566	0.495802168	3559.5	0.05062650277	0.1958105955
1	16848307	16851271	AT1G44446	2.045470166	-	702	772	98.77000046	18.20824995	216.9112518	94.40000153	13.57925034	207.6830013	0.08516009034	0.00900595627	0.1027410694	251830	0.009506574898	0.07923054251
[truncated: 12,535 more rows]
