# Supplementary material for: Nanopore direct RNA sequencing maps the complexity of Arabidopsis mRNA processing and m6A modification
Source: eLife. 2020 Jan 14;9:e49658. doi: 10.7554/eLife.49658 (PMC6959997; doi:10.7554/eLife.49658)
Supplement: Figure 7—figure supplement 1—source data 2. [file elife-49658-fig7-figsupp1-data2.tds]

Gene	fit_value	Predicted_Proximal_APA	Loci	A_1_long_exp	A_1_short_exp	A_1_PDUI	A_2_long_exp	A_2_short_exp	A_2_PDUI	A_3_long_exp	A_3_short_exp	A_3_PDUI	A_4_long_exp	A_4_short_exp	A_4_PDUI	A_5_long_exp	A_5_short_exp	A_5_PDUI	A_6_long_exp	A_6_short_exp	A_6_PDUI	B_1_long_exp	B_1_short_exp	B_1_PDUI	B_2_long_exp	B_2_short_exp	B_2_PDUI	B_3_long_exp	B_3_short_exp	B_3_PDUI	B_4_long_exp	B_4_short_exp	B_4_PDUI	B_5_long_exp	B_5_short_exp	B_5_PDUI	B_6_long_exp	B_6_short_exp	B_6_PDUI	Group_A_Mean_PDUI	Group_B_Mean_PDUI	PDUI_Group_diff	P_val	adjusted.P_val	Pass_Filter
AT1G01020|AT1G01020|1|-	1146.8	6868	1:6788-7069	17.89	47.23	0.27	7.93	65.11	0.11	17.51	51.98	0.25	9.02	65.86	0.12	19.11	44.51	0.30	19.45	58.02	0.25	16.99	61.43	0.22	39.70	121.42	0.25	22.74	97.94	0.19	34.23	80.36	0.30	28.43	118.76	0.19	19.00	79.59	0.19	0.21666666666666667	0.2233333333333333	-0.006666666666666626	1.0	1.0	N
AT1G01080|AT1G01080|1|-	16551.1	45645	1:44970-45954	133.33	335.89	0.28	147.41	349.88	0.30	128.92	317.87	0.29	114.06	375.20	0.23	130.04	335.37	0.28	137.62	375.39	0.27	130.44	351.56	0.27	136.37	308.95	0.31	133.96	277.08	0.33	152.03	241.96	0.39	190.19	312.09	0.38	141.59	247.54	0.36	0.275	0.34	-0.065	0.03723493317435374	0.09231625023791244	N
AT1G01090|AT1G01090|1|-	62962.1	47719	1:47234-47982	144.43	856.61	0.14	135.69	812.55	0.14	149.86	729.67	0.17	156.51	771.67	0.17	159.19	686.49	0.19	131.92	661.57	0.17	291.52	977.45	0.23	369.92	1099.43	0.25	310.65	1136.13	0.21	287.84	1000.47	0.22	401.80	1157.84	0.26	313.68	1028.92	0.23	0.16333333333333336	0.2333333333333333	-0.06999999999999995	2.328339612574325e-05	0.00014588089993790082	N
AT1G01100|AT1G01100|1|-	97486.5	50136	1:49909-50337	36.78	911.23	0.04	49.63	937.97	0.05	42.95	850.28	0.05	38.10	746.58	0.05	42.08	810.30	0.05	40.27	726.22	0.05	76.22	1516.41	0.05	117.50	2609.73	0.04	85.57	1923.23	0.04	64.88	1658.71	0.04	89.29	2411.88	0.04	95.93	2276.38	0.04	0.04833333333333333	0.041666666666666664	0.006666666666666668	0.42869827098707214	0.6194524820122925	N
AT1G01140|AT1G01140|1|-	6777.4	64274	1:64166-64475	118.01	151.88	0.44	100.78	206.59	0.33	121.64	206.93	0.37	143.13	136.16	0.51	80.40	159.32	0.34	77.81	192.89	0.29	134.36	123.21	0.52	153.65	309.85	0.33	183.41	110.07	0.62	247.21	158.14	0.61	257.88	243.21	0.51	270.67	132.53	0.67	0.38000000000000006	0.5433333333333333	-0.16333333333333327	5.9510734861924416e-05	0.000339861018576404	N
AT1G01220|AT1G01220|1|+	181.1	95477	1:95160-95681	55.56	23.82	0.70	39.15	18.67	0.68	41.41	25.68	0.62	41.00	25.65	0.62	34.89	26.93	0.56	63.65	21.53	0.75	56.67	5.72	0.91	57.48	40.93	0.58	59.89	24.73	0.71	36.98	10.46	0.78	85.54	9.29	0.90	59.84	0.00	1.00	0.655	0.8133333333333335	-0.15833333333333344	0.08787032726305262	0.18554344284168167	N
AT1G01230|AT1G01230|1|+	2604.3	99109	1:98908-99240	86.00	71.66	0.55	65.97	75.09	0.47	89.42	69.68	0.56	68.41	91.18	0.43	87.84	73.98	0.54	100.09	72.46	0.58	93.00	152.31	0.38	153.66	203.42	0.43	170.38	136.71	0.55	83.56	174.47	0.32	254.64	34.39	0.88	172.29	141.59	0.55	0.5216666666666667	0.5183333333333334	0.0033333333333332993	1.0	1.0	N
AT1G01290|AT1G01290|1|+	619.7	115339	1:114619-116407	20.33	54.47	0.27	14.85	80.26	0.16	17.97	70.12	0.20	20.97	61.71	0.25	19.91	75.45	0.21	16.42	69.81	0.19	15.23	76.52	0.17	34.84	78.84	0.31	20.20	70.64	0.22	21.65	93.41	0.19	22.71	85.22	0.21	27.72	78.71	0.26	0.21333333333333335	0.22666666666666666	-0.013333333333333308	0.8607005498279061	0.9824876000314888	N
AT1G01350|AT1G01350|1|+	668.8	138049	1:137848-138162	21.52	69.54	0.24	37.47	46.80	0.44	17.27	49.30	0.26	31.73	41.76	0.43	12.07	67.92	0.15	12.48	54.13	0.19	27.59	81.74	0.25	40.43	91.78	0.31	50.69	88.35	0.36	18.44	93.27	0.17	49.18	70.33	0.41	39.49	86.68	0.31	0.285	0.3016666666666667	-0.01666666666666672	0.8741917387719902	0.9895025980381896	N
AT1G01360|AT1G01360|1|+	732.6	143060	1:142711-143261	31.24	97.36	0.24	15.64	77.47	0.17	24.39	96.44	0.20	14.63	74.68	0.16	20.44	83.15	0.20	24.16	63.53	0.28	32.35	71.85	0.31	29.21	84.22	0.26	29.20	106.84	0.21	25.59	98.49	0.21	30.64	99.51	0.24	55.95	80.06	0.41	0.20833333333333337	0.2733333333333333	-0.06499999999999995	0.27671506998227174	0.4527029388234828	N
AT1G01430|AT1G01430|1|-	20603.2	156859	1:156477-157756	68.61	463.55	0.13	63.87	432.44	0.13	68.85	499.55	0.12	96.87	361.89	0.21	61.43	416.00	0.13	56.36	482.43	0.10	151.25	517.64	0.23	196.03	588.21	0.25	210.68	532.08	0.28	134.34	435.50	0.24	161.01	493.06	0.25	172.24	549.87	0.24	0.13666666666666666	0.24833333333333332	-0.11166666666666666	1.2916059251745797e-06	1.0546169333163352e-05	N
AT1G01448|AT1G01448|1|+	516.7	165718	1:165517-166353	61.77	9.54	0.87	60.66	0.00	1.00	71.05	8.46	0.89	65.09	0.00	1.00	60.61	28.38	0.68	72.23	5.49	0.93	82.40	6.20	0.93	80.57	0.00	1.00	57.00	7.23	0.89	86.41	0.00	1.00	98.37	0.00	1.00	86.14	0.00	1.00	0.895	0.9700000000000001	-0.07500000000000007	0.04614191497438364	0.11053814105603911	N
AT1G01470|AT1G01470|1|-	15603.3	172284	1:171525-172544	19.95	491.09	0.04	24.47	577.15	0.04	14.18	484.57	0.03	25.56	541.73	0.05	21.68	643.72	0.03	22.67	561.94	0.04	32.99	728.59	0.04	43.35	985.43	0.04	60.06	1060.58	0.05	51.12	933.19	0.05	47.49	956.86	0.05	59.47	1015.94	0.06	0.03833333333333334	0.04833333333333333	-0.009999999999999995	0.3093679812421124	0.4921065518813624	N
AT1G01490|AT1G01490|1|-	56386.6	180440	1:180017-180852	273.74	933.50	0.23	248.39	967.98	0.20	276.60	852.34	0.25	251.43	814.72	0.24	255.15	888.31	0.22	272.71	1035.90	0.21	323.16	874.79	0.27	458.63	1082.15	0.30	348.44	973.21	0.26	426.71	1061.09	0.29	430.93	1056.62	0.29	539.02	1388.87	0.28	0.225	0.2816666666666667	-0.05666666666666667	0.000583100070025426	0.0026029943377550127	N
AT1G01500|AT1G01500|1|+	685.9	186700	1:186340-187135	10.45	93.15	0.10	8.89	106.90	0.08	14.51	100.91	0.13	12.30	69.70	0.15	17.65	80.00	0.18	9.98	76.85	0.11	33.47	70.18	0.32	42.64	92.67	0.32	61.82	65.43	0.49	47.02	101.19	0.32	23.78	66.30	0.26	34.98	140.83	0.20	0.12499999999999999	0.3183333333333333	-0.1933333333333333	0.0007723469347948853	0.003330242332363138	N
AT1G01510|AT1G01510|1|+	2017.2	189966	1:189765-190472	23.42	182.35	0.11	8.88	191.48	0.04	29.11	139.10	0.17	11.16	140.99	0.07	11.70	129.11	0.08	20.76	126.55	0.14	25.15	193.97	0.11	47.23	248.62	0.16	27.44	252.77	0.10	20.44	181.77	0.10	23.29	247.09	0.09	30.67	280.02	0.10	0.10166666666666668	0.10999999999999999	-0.008333333333333304	0.8732457784340264	0.9889951333825986	N
AT1G01520|AT1G01520|1|+	789.0	192026	1:191780-192436	60.98	0.00	1.00	61.93	0.00	1.00	35.89	8.42	0.81	72.14	9.80	0.88	46.16	11.86	0.80	47.40	0.00	1.00	NA	NA	NA	35.92	0.00	1.00	NA	NA	NA	NA	NA	NA	39.38	9.46	0.81	14.25	20.79	0.41	0.915	0.7400000000000001	0.17499999999999993	0.04184315895955579	0.10183577530764289	N
AT1G01540|AT1G01540|1|+	2237.7	198468	1:198267-198787	36.84	124.25	0.23	33.01	126.76	0.21	54.77	120.02	0.31	44.51	178.32	0.20	23.00	120.37	0.16	30.78	153.08	0.17	142.01	254.46	0.36	166.88	204.59	0.45	129.13	225.49	0.36	115.98	270.53	0.30	159.92	126.41	0.56	190.20	165.97	0.53	0.2133333333333333	0.42666666666666675	-0.21333333333333346	1.9146887544340935e-06	1.5088233269477865e-05	N
AT1G01550|AT1G01550|1|+	34336.0	201026	1:200511-201775	839.96	140.09	0.86	934.98	100.77	0.90	982.74	192.27	0.84	803.84	326.68	0.71	895.24	172.54	0.84	926.61	145.40	0.86	935.51	5.61	0.99	864.20	0.00	1.00	860.37	0.00	1.00	867.78	0.00	1.00	920.79	0.00	1.00	936.43	0.00	1.00	0.8350000000000001	0.9983333333333334	-0.16333333333333333	5.2507194777860385e-51	6.441530796390107e-49	N
AT1G01610|AT1G01610|1|-	3784.8	221999	1:221642-222359	142.89	132.17	0.52	138.24	151.20	0.48	135.23	179.42	0.43	145.31	142.91	0.50	154.12	138.73	0.53	145.63	174.70	0.45	197.22	128.45	0.61	291.42	94.48	0.76	247.01	119.65	0.67	298.43	68.48	0.81	340.66	48.60	0.88	378.28	10.94	0.97	0.48500000000000004	0.7833333333333333	-0.2983333333333333	2.15756285683173e-16	5.906254024335234e-15	N
AT1G01620|AT1G01620|1|-	1178659.2	225880	1:225665-226081	163.83	1961.04	0.08	236.89	1979.00	0.11	207.84	2280.54	0.08	149.77	1520.16	0.09	152.87	1731.42	0.08	121.32	1603.83	0.07	337.60	3569.07	0.09	524.97	4147.36	0.11	457.05	2824.45	0.14	536.83	3297.40	0.14	494.34	3143.16	0.14	560.16	4182.03	0.12	0.085	0.12333333333333335	-0.038333333333333344	2.5211934138645824e-05	0.0001564840659186281	N
AT1G01630|AT1G01630|1|+	6163.8	230760	1:230559-230908	30.02	141.56	0.17	17.82	129.61	0.12	25.48	176.39	0.13	23.29	182.79	0.11	47.93	138.66	0.26	21.88	114.88	0.16	75.34	253.35	0.23	101.68	264.59	0.28	66.04	201.18	0.25	53.96	186.28	0.22	115.00	201.15	0.36	33.64	267.95	0.11	0.15833333333333335	0.24166666666666667	-0.08333333333333331	0.026649804669313618	0.06981785104112033	N
AT1G01650|AT1G01650|1|-	779.5	233096	1:232840-233297	31.67	59.91	0.35	18.72	70.20	0.21	17.45	85.28	0.17	17.19	76.56	0.18	22.04	49.56	0.31	18.87	66.25	0.22	26.69	70.99	0.27	37.50	78.47	0.32	40.75	104.30	0.28	20.41	105.31	0.16	25.46	116.22	0.18	20.61	112.61	0.15	0.24	0.22666666666666666	0.013333333333333336	1.0	1.0	N
AT1G01710|AT1G01710|1|+	1174.1	266153	1:265952-266324	12.71	59.47	0.18	21.18	59.00	0.26	23.17	61.06	0.28	9.64	51.01	0.16	13.98	46.01	0.23	33.14	71.80	0.32	26.87	92.23	0.23	43.28	118.82	0.27	38.99	133.11	0.23	33.43	134.24	0.20	66.71	135.27	0.33	65.70	195.13	0.25	0.23833333333333337	0.25166666666666665	-0.01333333333333328	0.8746384480010443	0.9897827420323855	N
AT1G01720|AT1G01720|1|+	8605.0	269559	1:269083-269792	650.53	303.39	0.68	890.81	255.72	0.78	652.84	307.02	0.68	598.63	279.62	0.68	631.84	271.37	0.70	516.79	200.68	0.72	438.02	75.67	0.85	487.63	49.50	0.91	401.15	141.64	0.74	358.68	59.56	0.86	651.79	0.00	1.00	530.44	9.69	0.98	0.7066666666666667	0.89	-0.18333333333333335	1.423124781250608e-17	4.3114606558802716e-16	N
AT1G01730|AT1G01730|1|+	1394.3	271921	1:271541-272111	100.33	125.28	0.44	111.16	107.68	0.51	77.59	139.28	0.36	45.23	174.33	0.21	53.69	139.56	0.28	92.57	137.82	0.40	56.12	129.15	0.30	143.85	73.51	0.66	101.78	63.02	0.62	136.40	62.60	0.69	113.88	89.09	0.56	144.37	46.85	0.75	0.3666666666666667	0.5966666666666667	-0.22999999999999998	3.037204946918504e-06	2.3109269186469507e-05	N
AT1G01780|AT1G01780|1|+	677.5	284046	1:283813-284245	72.37	74.74	0.49	79.56	96.62	0.45	77.46	112.82	0.41	46.89	137.32	0.25	48.11	102.04	0.32	67.59	81.88	0.45	85.32	110.88	0.43	162.98	49.16	0.77	126.59	56.90	0.69	200.78	46.72	0.81	152.50	31.09	0.83	165.39	50.05	0.77	0.395	0.7166666666666668	-0.32166666666666677	2.8904699795407394e-10	4.211524954061045e-09	N
AT1G01790|AT1G01790|1|+	7379.5	290951	1:290747-291203	67.68	193.80	0.26	75.92	192.37	0.28	46.27	214.71	0.18	64.96	152.88	0.30	52.57	181.51	0.22	43.48	184.90	0.19	58.15	204.79	0.22	84.23	204.56	0.29	93.86	249.24	0.27	62.55	203.06	0.24	136.61	154.16	0.47	82.38	204.98	0.29	0.2383333333333333	0.2966666666666667	-0.058333333333333376	0.14189025503963743	0.26995279807177425	N
AT1G01800|AT1G01800|1|+	3347.5	294870	1:294511-295086	95.39	185.74	0.34	93.64	213.82	0.30	99.44	208.47	0.32	79.39	151.96	0.34	122.13	190.31	0.39	114.33	195.84	0.37	178.15	265.89	0.40	318.39	298.63	0.52	274.01	298.65	0.48	270.92	302.52	0.47	356.10	275.83	0.56	291.43	287.41	0.50	0.3433333333333333	0.4883333333333333	-0.14499999999999996	2.5838949034827428e-05	0.0001597769984810704	N
AT1G01910|AT1G01910|1|-	1660.1	313549	1:313130-313759	51.16	92.94	0.36	70.01	110.45	0.39	64.21	111.37	0.37	36.97	118.96	0.24	62.84	136.28	0.32	88.67	129.77	0.41	115.34	115.42	0.50	142.47	217.12	0.40	126.79	113.95	0.53	120.39	196.25	0.38	146.13	122.10	0.54	120.40	146.19	0.45	0.3483333333333334	0.46666666666666673	-0.11833333333333335	0.01991083324725288	0.054625607393139666	N
AT1G01920|AT1G01920|1|+	2869.5	319498	1:319204-319667	50.15	24.73	0.67	73.30	8.68	0.89	67.33	24.44	0.73	42.31	18.34	0.70	34.33	49.45	0.41	36.29	32.54	0.53	41.82	48.74	0.46	70.95	18.42	0.79	50.57	80.65	0.39	55.45	40.04	0.58	66.58	50.84	0.57	59.88	83.16	0.42	0.6550000000000001	0.535	0.1200000000000001	0.07047425839739241	0.1559603288567315	N
AT1G01930|AT1G01930|1|-	321.2	319944	1:319769-320145	11.85	57.46	0.17	28.31	68.79	0.29	24.64	82.58	0.23	23.54	60.13	0.28	16.06	32.54	0.33	18.05	63.60	0.22	30.46	73.69	0.29	18.85	87.14	0.18	9.34	80.38	0.10	38.70	73.94	0.34	29.04	80.63	0.26	42.02	76.25	0.36	0.25333333333333335	0.25499999999999995	-0.0016666666666665941	0.8668835945360664	0.9853834681886173	N
AT1G01940|AT1G01940|1|+	899.0	324837	1:324636-324917	17.94	41.55	0.30	23.68	25.79	0.48	16.43	57.43	0.22	27.54	41.25	0.40	27.28	60.18	0.31	20.72	54.41	0.28	15.27	73.73	0.17	36.18	159.62	0.18	27.23	97.96	0.22	53.16	49.10	0.52	34.10	160.94	0.17	53.11	109.13	0.33	0.33166666666666667	0.26499999999999996	0.06666666666666671	0.32204242592765886	0.5057903566371339	N
AT1G01950|AT1G01950|1|+	510.3	330444	1:330243-330588	8.62	64.39	0.12	11.07	73.38	0.13	15.23	71.14	0.18	12.56	71.04	0.15	6.54	68.87	0.09	17.98	61.96	0.22	21.85	77.22	0.22	11.68	112.51	0.09	28.32	102.53	0.22	23.29	78.72	0.23	5.19	95.85	0.05	15.04	116.33	0.11	0.14833333333333332	0.15333333333333335	-0.005000000000000032	1.0	1.0	N
AT1G01960|AT1G01960|1|-	6277.1	331222	1:330619-331423	233.79	0.00	1.00	216.80	15.25	0.93	247.69	0.00	1.00	193.50	0.00	1.00	200.25	0.00	1.00	192.76	0.00	1.00	266.86	0.00	1.00	202.00	0.00	1.00	252.01	0.00	1.00	249.45	0.00	1.00	208.65	0.00	1.00	211.35	0.00	1.00	0.9883333333333333	1.0	-0.011666666666666714	0.23294308845242978	0.397716488032616	N
AT1G01970|AT1G01970|1|+	979.4	339327	1:339126-340088	112.70	4.38	0.96	119.07	0.00	1.00	103.88	0.00	1.00	123.81	32.42	0.79	107.01	0.00	1.00	97.19	5.33	0.95	103.08	0.00	1.00	120.40	0.00	1.00	120.75	0.00	1.00	118.46	0.00	1.00	117.80	0.00	1.00	118.23	0.00	1.00	0.9500000000000001	1.0	-0.04999999999999993	0.014247086946075356	0.0411072308313446	N
AT1G02050|AT1G02050|1|-	264.7	359765	1:359117-360149	40.72	31.53	0.56	54.71	19.96	0.73	51.04	17.39	0.75	39.53	15.25	0.72	49.20	29.97	0.62	50.10	0.00	1.00	56.00	0.00	1.00	54.31	0.00	1.00	38.04	1.22	0.97	51.44	7.01	0.88	44.91	37.63	0.54	41.69	0.00	1.00	0.73	0.8983333333333333	-0.16833333333333333	0.04551361748963178	0.10921729461349214	N
AT1G02080|AT1G02080|1|+	2666.9	386668	1:386428-386913	88.30	214.76	0.29	83.50	216.61	0.28	88.38	202.43	0.30	84.98	165.22	0.34	77.76	208.54	0.27	98.69	203.31	0.33	72.12	214.17	0.25	98.21	222.49	0.31	100.49	243.64	0.29	108.94	209.16	0.34	80.73	239.04	0.25	49.39	271.26	0.15	0.3016666666666667	0.265	0.03666666666666668	0.3655812353413398	0.5554710604872927	N
AT1G02100|AT1G02100|1|+	12093.1	392685	1:392374-392816	182.35	87.55	0.68	207.15	60.70	0.77	202.76	72.15	0.74	194.57	0.00	1.00	129.16	102.96	0.56	198.07	38.97	0.84	238.37	50.86	0.82	336.02	0.00	1.00	198.43	67.73	0.75	283.94	24.38	0.92	285.88	23.32	0.92	319.09	11.59	0.96	0.7650000000000001	0.895	-0.1299999999999999	2.4913762392625246e-06	1.9236057256838932e-05	N
AT1G02110|AT1G02110|1|+	1575.5	394873	1:394672-395528	140.55	0.00	1.00	137.12	0.00	1.00	158.61	0.00	1.00	146.28	25.51	0.85	131.12	17.27	0.88	139.53	0.00	1.00	130.13	0.00	1.00	126.38	0.00	1.00	148.49	0.00	1.00	139.64	0.00	1.00	151.19	0.00	1.00	148.30	0.00	1.00	0.9550000000000001	1.0	-0.04499999999999993	0.014814238780176413	0.04238672351241377	N
AT1G02120|AT1G02120|1|+	15407.3	399760	1:399484-399983	178.91	319.60	0.36	179.46	332.22	0.35	208.19	359.79	0.37	151.68	280.18	0.35	165.41	256.93	0.39	203.74	275.79	0.42	228.68	269.49	0.46	275.19	223.25	0.55	284.79	226.58	0.56	237.91	274.14	0.46	335.91	199.23	0.63	312.83	290.46	0.52	0.37333333333333335	0.53	-0.15666666666666668	5.73653586419307e-07	5.022375055725686e-06	N
AT1G02130|AT1G02130|1|-	4097.2	400181	1:400001-400446	162.86	223.89	0.42	122.43	236.74	0.34	137.63	265.64	0.34	175.79	182.82	0.49	141.81	196.04	0.42	130.32	288.75	0.31	169.80	247.53	0.41	260.51	193.52	0.57	184.13	314.43	0.37	254.94	97.13	0.72	156.44	324.18	0.33	267.26	181.05	0.60	0.3866666666666667	0.5000000000000001	-0.1133333333333334	0.0037441344851509148	0.013245092338534938	N
AT1G02140|AT1G02140|1|-	30462.8	403325	1:403100-403526	60.46	227.02	0.21	92.69	214.08	0.30	64.23	238.44	0.21	97.67	164.91	0.37	69.78	197.63	0.26	80.01	289.37	0.22	145.99	379.90	0.28	247.62	360.07	0.41	200.55	372.72	0.35	158.30	453.70	0.26	211.63	485.02	0.30	192.36	390.82	0.33	0.26166666666666666	0.3216666666666667	-0.06000000000000005	0.06328055191514631	0.1431410981973159	N
AT1G02150|AT1G02150|1|+	15740.1	409420	1:409219-410680	620.30	0.00	1.00	635.20	0.00	1.00	531.24	35.05	0.94	641.18	38.29	0.94	610.16	0.00	1.00	573.58	9.79	0.98	507.25	0.00	1.00	592.55	0.00	1.00	542.06	0.00	1.00	510.06	0.00	1.00	512.65	0.00	1.00	575.92	0.00	1.00	0.9766666666666666	1.0	-0.023333333333333428	0.00030560249775268735	0.0014871557395536015	N
AT1G02160|AT1G02160|1|+	12561.4	411487	1:411177-411632	87.64	121.42	0.42	92.45	122.05	0.43	83.23	106.83	0.44	86.09	89.29	0.49	64.70	112.30	0.37	86.59	92.95	0.48	136.36	51.39	0.73	204.35	84.00	0.71	164.03	77.47	0.68	115.87	90.70	0.56	204.93	95.74	0.68	219.27	23.69	0.90	0.4383333333333333	0.7100000000000001	-0.2716666666666668	8.837842235293807e-09	1.0393093289007639e-07	N
AT1G02205|AT1G02205|1|+	5455.3	422266	1:421981-422579	49.56	237.95	0.17	40.43	209.83	0.16	35.86	162.49	0.18	67.97	205.76	0.25	67.48	253.12	0.21	53.16	213.46	0.20	126.25	317.07	0.28	166.55	301.57	0.36	110.33	400.40	0.22	45.26	271.83	0.14	169.57	277.50	0.38	130.87	259.15	0.34	0.19499999999999998	0.2866666666666667	-0.0916666666666667	0.00696623693969759	0.02261466725572524	N
AT1G02260|AT1G02260|1|-	283.4	440719	1:440200-441013	10.25	82.31	0.11	10.37	51.49	0.17	8.64	75.02	0.10	4.24	84.83	0.05	6.38	44.10	0.13	9.23	96.63	0.09	10.34	53.50	0.16	6.15	61.41	0.09	4.48	57.56	0.07	10.59	79.38	0.12	2.20	54.04	0.04	10.83	62.18	0.15	0.10833333333333334	0.105	0.003333333333333341	1.0	1.0	N
AT1G02270|AT1G02270|1|-	720.9	443284	1:443118-443525	14.37	77.22	0.16	20.39	51.99	0.28	15.91	69.72	0.19	34.84	68.23	0.34	17.80	49.98	0.26	13.19	75.09	0.15	69.65	71.50	0.49	128.21	82.17	0.61	40.59	130.64	0.24	50.73	121.49	0.29	64.95	93.99	0.41	79.14	107.00	0.43	0.23	0.4116666666666667	-0.18166666666666667	0.0033751074781548903	0.012147208623841051	N
AT1G02280|AT1G02280|1|-	1946.9	448532	1:448423-448733	55.88	88.04	0.39	32.41	114.72	0.22	72.66	97.42	0.43	78.37	70.20	0.53	31.77	108.68	0.23	44.17	122.34	0.27	131.37	143.03	0.48	265.44	227.41	0.54	103.94	172.04	0.38	153.34	242.93	0.39	222.60	213.34	0.51	194.78	198.15	0.50	0.34500000000000003	0.4666666666666666	-0.12166666666666659	0.006692753286695382	0.02182667850669249	N
AT1G02305|AT1G02305|1|+	23766.1	458041	1:457840-458133	157.28	453.09	0.26	138.38	475.59	0.23	139.99	444.14	0.24	113.93	402.36	0.22	121.31	442.07	0.22	132.52	436.59	0.23	187.02	476.86	0.28	310.26	599.55	0.34	169.66	642.64	0.21	234.34	716.11	0.25	246.84	710.86	0.26	303.84	724.15	0.30	0.2333333333333333	0.2733333333333334	-0.04000000000000006	0.08594337767493501	0.18263886739859478	N
AT1G02330|AT1G02330|1|-	684.6	462167	1:461974-462383	29.72	84.75	0.26	43.93	93.94	0.32	24.33	107.73	0.18	22.40	128.54	0.15	20.14	91.25	0.18	14.55	73.32	0.17	39.03	125.20	0.24	46.28	170.15	0.21	27.33	166.68	0.14	50.87	86.66	0.37	50.80	118.73	0.30	64.36	121.78	0.35	0.21	0.2683333333333333	-0.05833333333333332	0.33327039808861036	0.5176970370183713	N
AT1G02335|AT1G02335|1|-	560.3	463991	1:463754-464523	21.72	22.55	0.49	14.65	42.11	0.26	25.72	71.40	0.26	36.84	44.17	0.45	45.79	44.74	0.51	14.74	52.50	0.22	64.12	69.22	0.48	42.70	87.55	0.33	33.73	82.51	0.29	40.34	85.66	0.32	47.48	42.33	0.53	59.50	65.07	0.48	0.365	0.405	-0.040000000000000036	0.7587835513453924	0.9087660780666704	N
AT1G02340|AT1G02340|1|-	25844.3	465871	1:465616-466247	97.48	239.68	0.29	103.58	302.62	0.25	178.46	558.87	0.24	46.36	192.30	0.19	89.23	284.99	0.24	52.63	201.02	0.21	319.33	887.47	0.26	516.56	952.09	0.35	401.47	1124.81	0.26	527.54	774.81	0.41	507.57	590.30	0.46	558.10	1068.26	0.34	0.23666666666666666	0.3466666666666667	-0.11000000000000001	0.00010566175813069665	0.0005740628160441403	N
AT1G02410|AT1G02410|1|+	885.8	492819	1:492607-492979	18.72	96.62	0.16	44.12	117.10	0.27	25.76	105.82	0.20	39.79	59.67	0.40	21.60	80.12	0.21	34.75	118.61	0.23	40.10	101.22	0.28	80.00	136.45	0.37	49.02	108.62	0.31	66.36	96.58	0.41	76.17	99.30	0.43	45.98	137.92	0.25	0.24500000000000002	0.3416666666666666	-0.0966666666666666	0.05535029656168268	0.12871890871365335	N
AT1G02475|AT1G02475|1|-	3931.5	513833	1:513699-514034	0.00	60.80	0.00	0.00	66.13	0.00	0.86	53.10	0.02	0.75	57.90	0.01	0.46	86.40	0.01	2.60	67.57	0.04	0.05	87.48	0.00	0.00	163.17	0.00	2.76	154.96	0.02	0.00	108.76	0.00	0.00	170.45	0.00	1.08	160.00	0.01	0.013333333333333334	0.005	0.008333333333333335	1.0	1.0	N
AT1G02500|AT1G02500|1|+	327505.8	519234	1:519033-520495	2816.95	0.00	1.00	2595.50	61.69	0.98	2733.54	152.37	0.95	2774.91	0.00	1.00	2751.09	83.80	0.97	2617.03	252.92	0.91	2171.25	0.00	1.00	2111.19	0.00	1.00	2111.09	0.00	1.00	1909.24	0.00	1.00	2126.35	0.00	1.00	1958.20	0.00	1.00	0.9683333333333333	1.0	-0.03166666666666673	1.4088098391843657e-22	6.008301876384138e-21	N
AT1G02560|AT1G02560|1|+	182217.3	539880	1:539611-540127	299.25	945.19	0.24	347.12	957.72	0.27	225.67	884.01	0.20	306.95	936.68	0.25	276.63	1000.86	0.22	289.70	1017.65	0.22	544.93	1477.17	0.27	863.79	1930.15	0.31	727.72	1670.48	0.30	844.43	1708.42	0.33	954.96	2044.18	0.32	1003.87	1907.17	0.34	0.2333333333333333	0.3116666666666667	-0.0783333333333334	1.0043539092192252e-07	9.90105634515024e-07	N
AT1G02610|AT1G02610|1|-	21292.6	553151	1:553019-553490	29.68	2.28	0.93	52.05	1.56	0.97	73.35	25.01	0.75	NA	NA	NA	37.41	0.00	1.00	23.63	9.92	0.70	209.30	10.03	0.95	328.34	0.00	1.00	205.79	29.18	0.88	315.55	32.37	0.91	246.16	19.99	0.92	276.19	25.14	0.92	0.8699999999999999	0.93	-0.060000000000000164	0.08826717549240251	0.18610458792022147	N
AT1G02660|AT1G02660|1|-	6627.6	572171	1:571826-572759	29.72	24.33	0.55	30.55	35.30	0.46	140.06	216.30	0.39	36.50	44.21	0.45	37.96	48.56	0.44	16.57	58.72	0.22	281.44	158.56	0.64	265.81	109.99	0.71	137.59	186.08	0.43	251.51	305.52	0.45	261.07	82.14	0.76	341.05	268.77	0.56	0.4183333333333334	0.5916666666666667	-0.17333333333333328	0.0006221434687541252	0.0027586968536411167	N
AT1G02680|AT1G02680|1|+	684.9	582017	1:581815-582310	39.61	48.59	0.45	40.14	53.76	0.43	33.33	77.27	0.30	37.91	77.93	0.33	31.93	65.19	0.33	62.48	51.49	0.55	59.46	103.63	0.36	64.60	148.63	0.30	72.61	81.23	0.47	75.70	145.66	0.34	96.58	126.38	0.43	54.30	143.37	0.27	0.3983333333333334	0.36166666666666664	0.036666666666666736	0.614382339588861	0.7901018905777807	N
AT1G02710|AT1G02710|1|-	83.0	589795	1:589706-589996	37.79	0.00	1.00	44.77	0.55	0.99	25.75	7.16	0.78	49.05	13.30	0.79	NA	NA	NA	36.15	4.36	0.89	33.58	12.59	0.73	27.18	5.22	0.84	35.55	5.73	0.86	NA	NA	NA	10.99	22.86	0.32	34.58	10.90	0.76	0.89	0.702	0.18800000000000006	0.09274807995863862	0.19309400179111502	N
AT1G02740|AT1G02740|1|-	280.8	599611	1:599330-599812	NA	NA	NA	NA	NA	NA	8.87	27.96	0.24	13.10	22.96	0.36	7.30	39.45	0.16	14.39	17.15	0.46	9.78	43.73	0.18	24.78	35.81	0.41	14.73	59.76	0.20	22.49	45.20	0.33	48.37	40.04	0.55	20.40	44.38	0.31	0.305	0.33	-0.025000000000000022	0.6582762957847195	0.8286409363076713	N
AT1G02750|AT1G02750|1|+	369.2	604164	1:603775-604387	15.78	60.64	0.21	25.75	80.65	0.24	23.46	59.73	0.28	11.19	57.98	0.16	23.53	41.58	0.36	24.02	46.38	0.34	41.15	63.10	0.39	52.17	29.59	0.64	19.82	67.46	0.23	78.91	20.95	0.79	43.45	62.39	0.41	55.34	38.10	0.59	0.265	0.5083333333333333	-0.2433333333333333	0.0009771557769995749	0.004119642323311318	N
AT1G02780|AT1G02780|1|-	526287.3	607946	1:607799-608147	232.42	1402.72	0.14	211.01	1460.67	0.13	173.51	1324.82	0.12	216.37	1083.30	0.17	204.58	1186.17	0.15	140.57	1233.53	0.10	150.70	2420.17	0.06	253.72	3779.68	0.06	151.67	3093.56	0.05	194.54	3350.19	0.05	199.31	3879.29	0.05	203.91	3312.49	0.06	0.135	0.05499999999999999	0.08000000000000002	3.4954699732114433e-19	1.1895371617740448e-17	N
AT1G02820|AT1G02820|1|-	15861.0	623870	1:623656-624134	129.90	335.95	0.28	129.34	467.04	0.22	58.18	244.69	0.19	97.45	445.38	0.18	127.14	389.55	0.25	81.18	335.18	0.19	123.65	453.17	0.21	194.44	747.71	0.21	129.06	617.94	0.17	132.10	539.10	0.20	221.12	656.64	0.25	134.62	484.81	0.22	0.2183333333333333	0.21	0.008333333333333304	0.7735578948380609	0.920687896990115	N
AT1G02840|AT1G02840|1|+	30101.7	629781	1:629580-629993	8.43	319.80	0.03	5.28	363.38	0.01	9.53	326.86	0.03	7.99	278.00	0.03	8.04	331.36	0.02	8.23	290.81	0.03	11.87	418.50	0.03	20.14	729.10	0.03	13.69	590.46	0.02	13.42	548.24	0.02	16.98	701.43	0.02	20.16	924.88	0.02	0.025000000000000005	0.023333333333333334	0.0016666666666666705	1.0	1.0	N
AT1G02850|AT1G02850|1|+	18783.5	633082	1:632881-633420	115.16	815.30	0.12	133.14	725.29	0.16	68.61	604.78	0.10	106.29	795.30	0.12	122.60	782.22	0.14	118.89	896.85	0.12	39.67	317.13	0.11	54.46	429.33	0.11	49.18	399.78	0.11	60.05	562.59	0.10	57.56	566.58	0.09	74.93	712.23	0.10	0.12666666666666668	0.10333333333333333	0.023333333333333345	0.14899987322197733	0.2807379105435701	N
AT1G02880|AT1G02880|1|-	268.7	642940	1:642505-643208	7.94	69.55	0.10	6.38	85.63	0.07	3.84	62.54	0.06	3.33	60.12	0.05	9.25	54.98	0.14	10.97	65.69	0.14	3.43	96.65	0.03	7.19	110.51	0.06	12.70	96.80	0.12	6.72	102.55	0.06	7.39	85.38	0.08	4.10	93.91	0.04	0.09333333333333334	0.065	0.028333333333333335	0.554436419345935	0.7360634200454985	N
AT1G02890|AT1G02890|1|-	6672.7	645284	1:645084-645485	35.54	129.48	0.22	54.15	128.45	0.30	30.28	111.58	0.21	37.29	138.58	0.21	22.99	134.53	0.15	40.38	144.85	0.22	55.49	112.27	0.33	68.63	161.89	0.30	62.85	140.26	0.31	76.03	113.03	0.40	53.11	164.25	0.24	94.95	97.99	0.49	0.2183333333333333	0.345	-0.12666666666666668	0.010290287166904104	0.03143393285506489	N
AT1G02920|AT1G02920|1|-	14246.1	658885	1:658578-659316	350.72	580.58	0.38	323.24	723.78	0.31	503.08	905.69	0.36	165.52	273.21	0.38	348.65	705.27	0.33	406.61	717.82	0.36	112.39	157.49	0.42	23.96	37.82	0.39	17.94	33.86	0.35	29.66	54.36	0.35	92.64	38.59	0.71	111.57	74.46	0.60	0.3533333333333333	0.47000000000000003	-0.11666666666666675	0.0018737974368965666	0.007276250539445557	N
AT1G02930|AT1G02930|1|-	6010.9	661423	1:661088-661790	401.32	298.25	0.57	371.77	348.45	0.52	538.52	499.54	0.52	218.64	198.87	0.52	408.29	270.31	0.60	381.69	478.32	0.44	138.64	77.13	0.64	54.69	0.00	1.00	44.62	34.52	0.56	80.35	58.85	0.58	83.54	50.11	0.63	163.93	57.25	0.74	0.5283333333333333	0.6916666666666668	-0.16333333333333344	0.0015885926442576657	0.006334608790525049	N
AT1G03000|AT1G03000|1|-	3656.3	687945	1:687795-688146	11.03	112.94	0.09	4.97	104.28	0.05	0.99	86.97	0.01	0.89	110.13	0.01	3.67	105.81	0.03	13.33	102.27	0.12	0.68	119.98	0.01	30.27	138.66	0.18	15.11	98.00	0.13	1.36	132.16	0.01	15.45	135.56	0.10	11.54	108.39	0.10	0.05166666666666667	0.08833333333333333	-0.03666666666666666	0.2157971472583437	0.37391041888511967	N
AT1G03040|AT1G03040|1|-	10228.1	704181	1:703929-704668	186.36	0.00	1.00	184.84	0.00	1.00	141.33	16.45	0.90	139.67	23.10	0.86	167.88	0.00	1.00	249.37	0.00	1.00	187.31	0.00	1.00	271.72	0.00	1.00	205.99	32.96	0.86	232.94	0.00	1.00	256.79	0.00	1.00	267.51	0.00	1.00	0.96	0.9766666666666666	-0.016666666666666607	0.5421204881953549	0.7241633675490309	N
AT1G03080|AT1G03080|1|-	2036.1	732540	1:731565-732741	160.78	4.18	0.97	140.72	0.00	1.00	136.03	0.00	1.00	126.04	57.95	0.69	146.31	5.58	0.96	152.85	21.20	0.88	163.39	0.00	1.00	166.83	0.00	1.00	166.58	0.00	1.00	172.08	0.00	1.00	175.03	0.00	1.00	180.08	0.00	1.00	0.9166666666666665	1.0	-0.08333333333333348	2.5247424673676085e-05	0.0001566065287030707	N
AT1G03110|AT1G03110|1|+	178.1	751743	1:751428-751976	19.91	17.51	0.53	15.60	34.15	0.31	13.12	38.93	0.25	NA	NA	NA	8.47	26.84	0.24	13.39	36.26	0.27	16.85	29.59	0.36	17.25	79.00	0.18	26.09	21.90	0.54	7.57	43.06	0.15	21.75	39.03	0.36	19.80	26.64	0.43	0.32	0.33666666666666667	-0.016666666666666663	1.0	1.0	N
AT1G03130|AT1G03130|1|-	30756309.9	753594	1:753307-754262	7275.81	4494.38	0.62	7450.26	4709.81	0.61	6016.76	4970.07	0.55	5885.98	6034.29	0.49	6547.35	5294.60	0.55	6039.50	6538.38	0.48	7295.50	3927.35	0.65	9710.25	2021.07	0.83	7363.02	4248.66	0.63	7860.84	2525.33	0.76	9723.28	1880.83	0.84	8296.60	2226.48	0.79	0.55	0.75	-0.19999999999999996	2.4914096159319673e-221	2.475713735351596e-218	N
AT1G03140|AT1G03140|1|-	1462.9	754496	1:754261-754890	96.63	115.58	0.46	110.95	126.87	0.47	87.29	141.21	0.38	82.58	120.68	0.41	87.90	109.40	0.45	70.15	113.55	0.38	168.13	124.04	0.58	239.71	77.96	0.75	156.06	183.67	0.46	168.16	235.65	0.42	211.14	108.39	0.66	262.16	133.45	0.66	0.425	0.5883333333333334	-0.16333333333333339	0.0003179670165509929	0.0015360419268192593	N
AT1G03150|AT1G03150|1|+	3849.8	758551	1:758350-758678	5.42	131.97	0.04	17.34	105.75	0.14	5.79	115.32	0.05	6.75	91.44	0.07	11.29	134.68	0.08	3.07	152.65	0.02	9.68	169.99	0.05	28.13	242.48	0.10	9.25	286.46	0.03	29.31	247.73	0.11	19.02	318.24	0.06	24.20	334.73	0.07	0.06666666666666668	0.07	-0.003333333333333327	1.0	1.0	N
AT1G03160|AT1G03160|1|+	1077.2	766033	1:765753-766194	81.81	99.19	0.45	59.87	114.46	0.34	67.15	112.80	0.37	49.79	138.49	0.26	74.13	116.93	0.39	74.49	84.51	0.47	65.99	148.38	0.31	144.87	165.30	0.47	71.53	134.50	0.35	42.95	170.78	0.20	107.38	109.14	0.50	118.92	131.72	0.47	0.38000000000000006	0.3833333333333333	-0.0033333333333332438	0.8381848276881514	0.9697616514770869	N
AT1G03250|AT1G03250|1|-	8971.4	793488	1:793315-793930	97.92	12.57	0.89	83.55	12.59	0.87	86.54	11.71	0.88	171.79	0.00	1.00	68.87	26.16	0.72	119.89	0.00	1.00	161.38	9.07	0.95	257.86	0.00	1.00	252.79	0.00	1.00	183.59	3.14	0.98	294.42	0.00	1.00	295.92	0.00	1.00	0.8933333333333334	0.9883333333333333	-0.09499999999999986	0.0002991869755221393	0.0014587934130341014	N
AT1G03260|AT1G03260|1|-	285.3	795655	1:795449-795856	14.13	48.16	0.23	9.65	31.15	0.24	10.67	42.93	0.20	30.49	23.33	0.57	8.87	30.80	0.22	13.01	35.28	0.27	16.59	58.19	0.22	35.18	60.67	0.37	23.46	52.85	0.31	39.81	66.00	0.38	12.61	43.20	0.23	38.17	57.94	0.40	0.2883333333333333	0.3183333333333333	-0.030000000000000027	0.6996271606371657	0.8627603824574899	N
AT1G03280|AT1G03280|1|+	1926.9	806862	1:806661-807066	37.83	138.83	0.21	53.12	90.08	0.37	50.83	120.92	0.30	31.50	135.89	0.19	40.37	125.33	0.24	50.17	103.82	0.33	82.33	164.38	0.33	72.14	247.99	0.23	51.33	157.05	0.25	70.15	254.84	0.22	69.87	288.39	0.20	91.73	225.33	0.29	0.2733333333333333	0.25333333333333335	0.019999999999999962	0.6530384222353182	0.8237170350028379	N
AT1G03290|AT1G03290|1|+	1615.5	810581	1:810380-811033	25.31	138.86	0.15	34.23	115.60	0.23	36.68	141.10	0.21	31.32	105.85	0.23	35.01	115.03	0.23	48.41	127.10	0.28	31.64	199.44	0.14	69.54	170.63	0.29	84.38	203.51	0.29	73.36	149.72	0.33	91.35	166.70	0.35	79.54	160.18	0.33	0.22166666666666668	0.28833333333333333	-0.06666666666666665	0.16421128701000035	0.3021798722236713	N
AT1G03330|AT1G03330|1|-	2731.6	818079	1:817934-818280	35.93	106.69	0.25	41.72	79.64	0.34	30.39	107.49	0.22	20.17	114.52	0.15	11.80	103.00	0.10	29.55	130.34	0.18	65.48	189.24	0.26	103.76	293.88	0.26	54.51	287.85	0.16	93.91	313.71	0.23	188.25	240.71	0.44	79.97	314.25	0.20	0.20666666666666667	0.25833333333333336	-0.051666666666666694	0.2442503533918989	0.4126344375476538	N
AT1G03360|AT1G03360|1|+	337.2	826071	1:825745-826399	36.46	10.69	0.77	31.58	37.61	0.46	30.85	34.02	0.48	30.04	20.26	0.60	34.58	6.49	0.84	27.76	43.47	0.39	42.47	28.04	0.60	56.50	18.20	0.76	25.99	48.79	0.35	35.90	55.16	0.39	66.50	26.40	0.72	61.45	60.03	0.51	0.59	0.555	0.03499999999999992	1.0	1.0	N
AT1G03365|AT1G03365|1|+	440.1	830188	1:829721-830393	32.61	47.09	0.41	27.48	29.48	0.48	40.58	37.08	0.52	27.80	43.33	0.39	37.59	19.77	0.66	24.23	40.96	0.37	49.69	40.14	0.55	85.83	22.09	0.80	53.78	39.06	0.58	59.61	49.80	0.54	82.50	11.99	0.87	81.16	32.66	0.71	0.4716666666666667	0.6750000000000002	-0.20333333333333348	0.0063429514763732155	0.02083654080079871	N
AT1G03370|AT1G03370|1|+	290.8	834873	1:834514-835411	64.73	29.98	0.68	39.96	45.11	0.47	51.57	41.77	0.55	76.83	25.20	0.75	35.21	45.05	0.44	48.42	29.49	0.62	47.32	15.46	0.75	36.68	19.38	0.65	43.66	18.20	0.71	69.94	0.00	1.00	47.11	22.77	0.67	54.76	0.00	1.00	0.5850000000000001	0.7966666666666665	-0.21166666666666645	0.007483364845877699	0.024026557826651595	N
AT1G03380|AT1G03380|1|+	1048.6	840824	1:840508-841033	19.92	142.76	0.12	18.74	146.65	0.11	24.54	136.10	0.15	6.30	127.56	0.05	21.32	119.76	0.15	10.67	114.63	0.09	31.27	152.48	0.17	45.21	216.07	0.17	29.02	163.11	0.15	25.39	143.10	0.15	50.20	180.50	0.22	52.78	158.15	0.25	0.11166666666666665	0.18499999999999997	-0.07333333333333332	0.05305304337530288	0.12430749635000818	N
AT1G03400|AT1G03400|1|-	3670.1	843351	1:842659-843552	84.87	27.92	0.75	113.66	0.00	1.00	123.74	1.82	0.99	119.37	3.71	0.97	80.28	25.08	0.76	97.55	15.87	0.86	172.65	31.54	0.85	217.01	0.00	1.00	158.56	0.00	1.00	142.47	51.05	0.74	143.65	0.00	1.00	193.01	0.00	1.00	0.8883333333333333	0.9316666666666666	-0.043333333333333335	0.39062194856986615	0.5816889409469145	N
AT1G03420|AT1G03420|1|+	6729.0	846865	1:846664-847739	238.99	0.00	1.00	241.79	0.00	1.00	211.80	0.00	1.00	199.27	0.00	1.00	203.84	0.00	1.00	244.69	0.00	1.00	267.29	0.00	1.00	288.23	0.00	1.00	304.95	0.00	1.00	236.67	0.00	1.00	289.11	0.00	1.00	255.58	0.00	1.00	1.0	1.0	0.0	1.0	1.0	N
AT1G03430|AT1G03430|1|+	4756.6	849363	1:848998-849621	9.65	69.29	0.12	10.28	80.57	0.11	12.83	69.26	0.16	10.82	49.40	0.18	9.94	63.86	0.13	14.42	71.85	0.17	24.86	92.86	0.21	21.34	141.94	0.13	17.77	109.51	0.14	54.33	96.70	0.36	33.60	160.00	0.17	39.80	128.51	0.24	0.14500000000000002	0.20833333333333334	-0.06333333333333332	0.2823090083794487	0.4592084819555708	N
AT1G03475|AT1G03475|1|-	21207.6	869115	1:868853-869370	76.18	615.57	0.11	49.14	635.29	0.07	55.63	536.94	0.09	57.72	524.72	0.10	57.53	603.04	0.09	42.88	591.52	0.07	85.39	685.29	0.11	117.67	926.32	0.11	72.45	851.59	0.08	96.10	825.43	0.10	125.56	869.32	0.13	109.56	928.28	0.11	0.08833333333333333	0.10666666666666667	-0.01833333333333334	0.23057838395371846	0.3941609154220025	N
AT1G03520|AT1G03520|1|-	1195.8	878255	1:877861-878456	55.37	16.95	0.77	94.84	0.00	1.00	88.43	0.00	1.00	60.72	0.00	1.00	68.07	0.00	1.00	86.43	10.62	0.89	137.26	0.00	1.00	176.45	2.09	0.99	187.24	0.00	1.00	199.64	0.00	1.00	162.25	0.00	1.00	166.34	0.00	1.00	0.9433333333333332	0.9983333333333334	-0.05500000000000016	0.009456665371160088	0.029256190471113885	N
AT1G03530|AT1G03530|1|-	277.4	881433	1:880384-881876	40.40	3.81	0.91	33.46	28.13	0.54	34.63	16.46	0.68	55.21	0.00	1.00	39.99	12.48	0.76	35.61	1.69	0.95	48.42	0.00	1.00	44.60	0.00	1.00	48.92	0.00	1.00	39.85	0.00	1.00	30.18	0.00	1.00	40.68	1.58	0.96	0.8066666666666668	0.9933333333333333	-0.18666666666666654	0.0015076115247387371	0.006048096778897389	N
AT1G03545|AT1G03545|1|+	881.5	887137	1:886703-887972	20.65	28.42	0.42	29.25	11.83	0.71	27.03	19.03	0.59	22.57	23.80	0.49	26.63	21.50	0.55	27.38	12.92	0.68	29.25	20.40	0.59	22.01	12.62	0.64	28.17	20.83	0.57	28.28	7.22	0.80	37.82	0.00	1.00	19.61	17.10	0.53	0.5733333333333334	0.6883333333333334	-0.11499999999999999	0.3718338953915903	0.5621876154176302	N
AT1G03550|AT1G03550|1|-	194.1	885736	1:885623-885937	14.71	38.83	0.27	64.77	16.29	0.80	39.77	15.10	0.72	14.92	35.73	0.29	34.65	12.96	0.73	36.77	27.20	0.57	72.79	7.47	0.91	79.32	17.16	0.82	55.71	58.66	0.49	82.24	51.55	0.61	101.84	0.00	1.00	93.94	43.28	0.68	0.5633333333333334	0.7516666666666666	-0.18833333333333324	0.056700237845724255	0.13103029383092138	N
AT1G03580|AT1G03580|1|+	224.1	893933	1:893569-894194	15.60	17.80	0.47	NA	NA	NA	23.09	18.95	0.55	4.06	34.01	0.11	NA	NA	NA	14.69	29.91	0.33	12.61	44.88	0.22	19.81	36.81	0.35	46.59	10.86	0.81	53.42	49.18	0.52	30.39	18.35	0.62	80.68	27.87	0.74	0.36500000000000005	0.5433333333333333	-0.1783333333333333	0.04773026256353259	0.11368543123054252	N
AT1G03590|AT1G03590|1|-	2250.1	894436	1:894238-894944	80.12	25.23	0.76	85.76	49.49	0.63	85.98	64.03	0.57	62.28	31.90	0.66	87.71	17.00	0.84	56.59	15.49	0.79	167.60	18.54	0.90	214.19	0.00	1.00	189.25	46.20	0.80	216.00	1.50	0.99	155.81	15.94	0.91	241.42	8.14	0.97	0.7083333333333334	0.9283333333333333	-0.21999999999999997	1.0298242355149783e-07	1.0112019197937095e-06	N
AT1G03610|AT1G03610|1|+	73533.3	902748	1:902170-903070	64.25	119.29	0.35	123.17	157.98	0.44	156.78	329.33	0.32	89.56	87.16	0.51	68.30	142.88	0.32	82.87	84.09	0.50	408.13	347.61	0.54	591.81	269.36	0.69	472.70	429.30	0.52	541.80	344.44	0.61	650.30	220.08	0.75	626.10	364.20	0.63	0.40666666666666673	0.6233333333333333	-0.21666666666666656	3.139626819844905e-11	5.217135737257328e-10	N
AT1G03630|AT1G03630|1|+	66756.8	909291	1:909090-909650	48.92	709.29	0.06	53.53	727.59	0.07	34.97	510.79	0.06	60.37	704.87	0.08	39.00	690.48	0.05	22.92	615.31	0.04	69.30	925.53	0.07	113.60	1498.10	0.07	78.02	1233.65	0.06	96.58	1240.47	0.07	100.38	1452.22	0.06	107.51	1330.28	0.07	0.06	0.06666666666666667	-0.006666666666666668	0.5757240487483771	0.7553280993791084	N
AT1G03680|AT1G03680|1|-	96984.7	916935	1:916772-917303	359.49	1361.17	0.21	392.26	1456.85	0.21	318.51	1255.96	0.20	340.09	1298.19	0.21	324.49	1374.25	0.19	252.61	1446.55	0.15	433.30	1935.28	0.18	762.01	2003.48	0.28	648.83	1820.16	0.26	548.49	1702.79	0.24	457.92	1859.26	0.20	562.93	1748.72	0.24	0.19499999999999998	0.2333333333333333	-0.03833333333333333	0.0021633274824501823	0.00824587080671556	N
AT1G03687|AT1G03687|1|+	1100.5	920170	1:919913-920592	64.96	0.00	1.00	81.29	0.00	1.00	67.21	0.00	1.00	62.36	0.00	1.00	60.84	0.00	1.00	58.19	18.60	0.76	48.42	0.00	1.00	84.13	0.00	1.00	74.49	0.00	1.00	77.88	0.00	1.00	79.03	0.00	1.00	73.58	0.00	1.00	0.96	1.0	-0.040000000000000036	0.11197104428258624	0.22342495322009226	N
AT1G03740|AT1G03740|1|+	1429.0	936445	1:936189-937032	52.98	43.48	0.55	59.61	65.33	0.48	98.47	28.45	0.78	63.45	38.77	0.62	61.21	53.27	0.53	85.17	47.41	0.64	100.94	0.00	1.00	77.14	10.32	0.88	82.62	0.00	1.00	88.08	0.00	1.00	74.01	0.00	1.00	100.84	0.00	1.00	0.6	0.98	-0.38	1.1462449208402036e-12	2.2333795643900203e-11	N
AT1G03860|AT1G03860|1|-	6192.4	979598	1:979307-979799	157.21	190.97	0.45	124.07	176.18	0.41	142.96	185.82	0.43	120.95	252.00	0.32	105.79	163.55	0.39	98.60	113.43	0.47	154.46	234.96	0.40	242.79	137.03	0.64	241.76	95.51	0.72	154.42	140.11	0.52	244.53	156.22	0.61	229.62	159.68	0.59	0.4116666666666666	0.58	-0.16833333333333333	1.2943290166202241e-05	8.53382473777247e-05	N
AT1G03900|AT1G03900|1|+	1944.9	993004	1:992778-993126	127.02	130.13	0.49	182.10	89.90	0.67	84.57	180.02	0.32	140.76	172.98	0.45	96.60	195.18	0.33	83.33	232.35	0.26	155.95	164.09	0.49	242.55	117.10	0.67	135.19	168.64	0.44	174.40	203.11	0.46	201.18	79.58	0.72	208.85	144.46	0.59	0.4200000000000001	0.5616666666666666	-0.14166666666666655	0.0005065314576468774	0.0023142083193733428	N
AT1G03910|AT1G03910|1|+	3226.8	1000371	1:1000112-1000629	10.79	133.97	0.07	23.66	143.26	0.14	15.20	156.21	0.09	6.65	129.58	0.05	17.90	140.44	0.11	17.32	123.40	0.12	37.79	219.14	0.15	55.58	265.81	0.17	44.15	264.70	0.14	46.18	285.18	0.14	51.06	327.62	0.13	58.48	252.82	0.19	0.09666666666666668	0.15333333333333335	-0.05666666666666667	0.14753172441791074	0.278552678233095	N
AT1G03930|AT1G03930|1|+	651.6	1008126	1:1007828-1008370	42.49	97.29	0.30	74.86	61.13	0.55	48.80	97.73	0.33	62.80	110.89	0.36	44.37	97.14	0.31	55.82	67.52	0.45	69.06	138.47	0.33	55.10	97.85	0.36	53.08	153.05	0.26	61.29	93.49	0.40	58.86	109.30	0.35	58.25	149.85	0.28	0.38333333333333336	0.33	0.053333333333333344	0.34736412039351977	0.5339588916813814	N
AT1G03950|AT1G03950|1|-	756.2	1011232	1:1011151-1011433	9.39	51.91	0.15	6.61	38.94	0.15	4.81	35.73	0.12	1.53	39.15	0.04	3.26	36.77	0.08	6.16	45.78	0.12	5.12	41.86	0.11	6.94	57.87	0.11	22.27	77.13	0.22	10.43	21.42	0.33	9.59	91.76	0.09	18.44	45.10	0.29	0.10999999999999999	0.19166666666666665	-0.08166666666666667	0.4234855376560342	0.6141529170589626	N
AT1G03960|AT1G03960|1|+	114.2	1017769	1:1017568-1017957	9.66	28.31	0.25	30.75	24.77	0.55	20.44	21.87	0.48	24.12	41.33	0.37	24.50	25.87	0.49	9.06	35.65	0.20	10.71	33.07	0.24	16.75	35.76	0.32	20.80	49.36	0.30	17.20	18.59	0.48	11.76	28.13	0.29	26.50	29.73	0.47	0.38999999999999996	0.35000000000000003	0.039999999999999925	0.6771540488452201	0.8437466813009346	N
AT1G04007|AT1G04007|1|-	3426.4	72907	1:72646-73108	23.88	30.40	0.44	40.02	24.65	0.62	47.23	36.52	0.56	22.79	25.26	0.47	39.06	18.94	0.67	33.52	36.73	0.48	11.03	49.99	0.18	20.17	63.92	0.24	19.86	58.27	0.25	9.51	64.05	0.13	32.95	40.65	0.45	48.62	13.90	0.78	0.5399999999999999	0.3383333333333334	0.20166666666666655	0.013645970666927895	0.039672326072926416	N
AT1G04080|AT1G04080|1|+	3903.5	1056635	1:1056434-1056827	27.40	184.41	0.13	37.66	161.31	0.19	32.78	164.27	0.17	15.02	174.06	0.08	23.65	175.40	0.12	25.88	175.00	0.13	60.18	199.12	0.23	61.31	186.07	0.25	48.36	230.41	0.17	37.53	220.64	0.15	90.79	186.85	0.33	111.37	156.42	0.42	0.13666666666666666	0.25833333333333336	-0.1216666666666667	0.0016068818878058233	0.006394707776982966	N
AT1G04097|AT1G04097|1|-	19599.5	455997	1:455880-456198	1.27	59.40	0.02	2.64	58.27	0.04	0.00	67.65	0.00	0.54	45.93	0.01	1.74	64.75	0.03	1.86	60.24	0.03	4.01	51.98	0.07	0.46	41.88	0.01	0.00	46.93	0.00	0.00	38.01	0.00	0.00	36.59	0.00	0.00	38.69	0.00	0.021666666666666667	0.013333333333333334	0.008333333333333333	1.0	1.0	N
AT1G04120|AT1G04120|1|-	1144.3	1064665	1:1064264-1064960	18.82	131.67	0.13	10.11	127.19	0.07	14.04	108.18	0.11	21.59	146.37	0.13	17.88	119.98	0.13	12.86	146.61	0.08	11.58	166.27	0.07	22.60	207.37	0.10	18.27	157.01	0.10	20.00	174.61	0.10	30.29	179.71	0.14	27.16	187.92	0.13	0.10833333333333334	0.10666666666666667	0.0016666666666666635	1.0	1.0	N
AT1G04140|AT1G04140|1|-	3709.6	1075798	1:1075568-1076010	219.69	215.04	0.51	186.89	266.85	0.41	143.55	291.85	0.33	145.03	263.94	0.35	195.78	234.97	0.45	190.98	267.38	0.42	228.19	319.14	0.42	279.84	312.49	0.47	301.44	392.81	0.43	245.99	259.12	0.49	336.76	150.50	0.69	270.92	283.86	0.49	0.4116666666666667	0.49833333333333335	-0.08666666666666667	0.014929561504498014	0.042635620786257704	N
AT1G04170|AT1G04170|1|+	15255.6	1099689	1:1099400-1099901	196.66	185.50	0.51	170.51	245.40	0.41	173.52	253.35	0.41	110.48	283.91	0.28	121.02	319.15	0.27	115.12	261.75	0.31	289.75	217.87	0.57	430.42	335.07	0.56	415.16	221.14	0.65	298.24	363.84	0.45	442.18	350.86	0.56	341.13	358.66	0.49	0.365	0.5466666666666667	-0.18166666666666675	6.434153889237839e-09	7.778124963182043e-08	N
AT1G04190|AT1G04190|1|-	1938.1	1106491	1:1106354-1106692	11.79	78.32	0.13	1.22	93.77	0.01	8.28	63.91	0.11	3.42	64.31	0.05	7.81	62.02	0.11	10.93	83.65	0.12	15.95	131.33	0.11	27.84	184.68	0.13	12.31	132.00	0.09	16.32	145.83	0.10	18.31	118.64	0.13	21.58	177.78	0.11	0.08833333333333333	0.11166666666666665	-0.023333333333333317	0.6594960293321692	0.8293358698397577	N
AT1G04200|AT1G04200|1|+	1595.4	1113973	1:1113507-1114155	NA	NA	NA	15.81	15.43	0.51	10.43	21.80	0.32	NA	NA	NA	NA	NA	NA	NA	NA	NA	9.06	34.84	0.21	28.64	14.44	0.66	10.91	37.07	0.23	25.82	42.61	0.38	47.72	10.95	0.81	34.00	19.16	0.64	0.41500000000000004	0.48833333333333334	-0.0733333333333333	0.5041054647373691	0.6898251167569291	N
AT1G04210|AT1G04210|1|+	774.6	1119363	1:1119153-1119699	99.61	57.90	0.63	80.64	74.89	0.52	93.10	64.90	0.59	111.83	48.77	0.70	85.79	60.17	0.59	116.37	50.92	0.70	162.42	59.70	0.73	162.81	8.65	0.95	161.58	0.00	1.00	181.92	0.00	1.00	166.31	33.54	0.83	155.28	20.67	0.88	0.6216666666666666	0.8983333333333333	-0.2766666666666667	3.5900459446088433e-09	4.504329110047737e-08	N
AT1G04230|AT1G04230|1|+	600.0	1128024	1:1127823-1128149	3.81	61.55	0.06	7.84	30.57	0.20	15.25	32.14	0.32	2.20	44.83	0.05	3.97	32.60	0.11	9.28	26.45	0.26	2.94	58.11	0.05	7.49	40.86	0.15	4.63	74.47	0.06	21.11	72.46	0.23	15.74	48.01	0.25	6.43	73.44	0.08	0.16666666666666666	0.13666666666666666	0.03	0.7843026009527723	0.9286433473753603	N
AT1G04237|AT1G04237|1|+	10748.1	1043319	1:1043118-1043415	0.00	40.50	0.00	0.00	46.52	0.00	0.25	47.51	0.01	0.00	74.38	0.00	0.13	53.47	0.00	0.00	62.27	0.00	13.23	78.15	0.14	3.57	67.13	0.05	11.34	31.85	0.26	6.05	59.04	0.09	3.73	55.03	0.06	15.59	65.88	0.19	0.0016666666666666668	0.13166666666666668	-0.13	0.008405481213186652	0.026499132872917438	N
AT1G04250|AT1G04250|1|+	7584.6	1138504	1:1138303-1138663	61.17	102.67	0.37	59.88	67.11	0.47	50.43	129.58	0.28	97.52	58.50	0.63	71.64	97.57	0.42	37.57	113.35	0.25	68.87	136.93	0.33	116.40	264.84	0.31	57.49	154.58	0.27	94.18	194.26	0.33	108.31	245.56	0.31	83.76	190.72	0.31	0.4033333333333333	0.31	0.09333333333333332	0.05916096043447277	0.1354567889026166	N
AT1G04270|AT1G04270|1|-	113082.0	1141817	1:1141558-1142100	419.81	818.34	0.34	354.73	769.57	0.32	376.52	928.78	0.29	278.30	843.46	0.25	346.10	799.16	0.30	300.52	859.60	0.26	660.19	1580.82	0.29	776.96	2055.90	0.27	693.65	1781.71	0.28	650.70	1847.26	0.26	957.42	1795.52	0.35	708.85	1903.09	0.27	0.29333333333333333	0.2866666666666667	0.006666666666666654	0.846361427401403	0.97454154160924	N
AT1G04280|AT1G04280|1|-	3104.7	1143631	1:1143436-1143888	69.84	210.48	0.25	49.62	201.61	0.20	70.63	228.89	0.24	56.86	148.96	0.28	53.09	157.68	0.25	53.66	265.57	0.17	86.17	273.59	0.24	123.15	319.50	0.28	77.05	318.47	0.19	88.81	260.62	0.25	99.99	331.98	0.23	104.34	355.02	0.23	0.23166666666666666	0.23666666666666666	-0.0050000000000000044	0.7070089398227433	0.8681073864691987	N
AT1G04290|AT1G04290|1|-	1081.0	1147652	1:1147297-1147864	13.22	118.23	0.10	7.99	139.97	0.05	3.20	111.08	0.03	3.71	108.95	0.03	8.07	100.05	0.07	5.11	141.01	0.03	20.39	156.20	0.12	26.79	211.77	0.11	9.19	148.60	0.06	23.70	151.86	0.13	19.88	193.96	0.09	26.23	216.67	0.11	0.05166666666666667	0.10333333333333333	-0.05166666666666666	0.09708794965801812	0.1998941431471411	N
AT1G04300|AT1G04300|1|-	2107.3	1149795	1:1148564-1149996	172.50	0.00	1.00	172.71	10.34	0.94	204.44	0.09	1.00	163.87	18.76	0.90	177.17	0.00	1.00	177.83	14.37	0.93	226.76	0.00	1.00	173.89	0.00	1.00	177.85	0.00	1.00	178.96	0.00	1.00	145.79	0.00	1.00	166.65	0.00	1.00	0.9616666666666666	1.0	-0.03833333333333344	0.0148501714842477	0.04247730398358359	N
AT1G04310|AT1G04310|1|-	185.4	1155076	1:1154740-1155277	9.51	29.44	0.24	10.11	35.15	0.22	23.53	44.21	0.35	NA	NA	NA	23.56	38.82	0.38	4.63	28.09	0.14	NA	NA	NA	7.90	44.46	0.15	15.42	29.35	0.34	33.30	27.09	0.55	20.07	50.40	0.28	18.78	57.89	0.24	0.266	0.312	-0.045999999999999985	0.8347344586806253	0.9669802186884326	N
AT1G04340|AT1G04340|1|-	408.2	1163214	1:1162905-1163452	16.13	54.68	0.23	15.18	44.93	0.25	17.31	59.85	0.22	19.70	38.56	0.34	14.05	42.81	0.25	11.34	54.48	0.17	23.09	90.22	0.20	32.73	126.06	0.21	14.99	94.03	0.14	11.37	74.16	0.13	35.33	87.71	0.29	15.78	56.90	0.22	0.24333333333333332	0.19833333333333333	0.044999999999999984	0.7011704331961099	0.8640290916009108	N
AT1G04350|AT1G04350|1|+	17883.3	1166668	1:1166284-1167135	56.83	576.02	0.09	41.38	616.51	0.06	37.20	455.70	0.08	36.41	564.13	0.06	45.29	582.86	0.07	33.97	583.01	0.06	44.78	461.27	0.09	63.05	607.28	0.09	47.02	558.21	0.08	47.51	458.04	0.09	68.73	613.74	0.10	88.01	431.62	0.17	0.06999999999999999	0.10333333333333333	-0.03333333333333334	0.03710619751824388	0.09206598869882382	N
AT1G04390|AT1G04390|1|-	149.5	1179712	1:1179310-1180110	21.09	18.88	0.53	28.38	23.13	0.55	22.46	31.82	0.41	25.40	38.31	0.40	18.75	32.30	0.37	15.91	41.74	0.28	23.53	25.72	0.48	63.07	0.74	0.99	50.90	0.00	1.00	6.97	26.15	0.21	28.39	7.21	0.80	32.36	0.00	1.00	0.42333333333333334	0.7466666666666666	-0.32333333333333325	0.00016639844506571562	0.0008598550954851878	N
AT1G04400|AT1G04400|1|-	7966.5	1185801	1:1185512-1186306	316.23	223.47	0.59	279.37	278.70	0.50	298.33	388.87	0.43	165.83	301.90	0.35	175.08	348.25	0.33	294.32	237.02	0.55	362.68	383.05	0.49	503.97	299.12	0.63	491.56	444.70	0.53	528.68	339.26	0.61	481.94	295.63	0.62	500.63	347.92	0.59	0.4583333333333333	0.5783333333333334	-0.12000000000000005	3.516911351601268e-05	0.00021103591848346495	N
AT1G04410|AT1G04410|1|-	132835.6	1189218	1:1188995-1189512	126.81	1700.05	0.07	148.87	1696.65	0.08	141.24	1660.79	0.08	108.00	1396.23	0.07	139.61	1625.30	0.08	156.03	1661.13	0.09	222.78	2128.36	0.09	351.95	2709.75	0.11	287.91	2422.60	0.11	243.54	2459.06	0.09	306.71	2543.12	0.11	339.50	2649.11	0.11	0.07833333333333335	0.10333333333333333	-0.02499999999999998	0.0017459862098099827	0.006857654137107431	N
AT1G04420|AT1G04420|1|+	4639.2	1193661	1:1193460-1193884	488.06	116.22	0.81	450.77	145.40	0.76	390.11	193.97	0.67	463.69	183.02	0.72	430.44	231.45	0.65	340.48	219.40	0.61	552.83	115.20	0.83	783.74	0.00	1.00	649.44	138.43	0.82	675.21	91.30	0.88	941.89	0.00	1.00	747.84	0.00	1.00	0.7033333333333333	0.9216666666666665	-0.21833333333333327	1.1487502017902205e-28	6.794720687612752e-27	N
AT1G04430|AT1G04430|1|+	4947.4	1201336	1:1200962-1201579	53.57	245.12	0.18	40.70	197.61	0.17	52.21	268.32	0.16	48.05	268.36	0.15	69.26	184.15	0.27	43.83	254.84	0.15	93.47	536.14	0.15	97.29	540.39	0.15	73.42	533.65	0.12	138.72	622.22	0.18	142.69	418.15	0.25	142.08	722.59	0.16	0.18000000000000002	0.16833333333333333	0.011666666666666686	0.7791705008608094	0.9252307496618595	N
AT1G04440|AT1G04440|1|+	3151.9	1205683	1:1205386-1206009	43.19	212.53	0.17	42.38	226.02	0.16	36.54	264.35	0.12	25.47	278.64	0.08	28.83	232.60	0.11	36.47	342.31	0.10	38.83	299.66	0.11	66.65	338.21	0.16	50.25	280.80	0.15	47.31	271.48	0.15	44.76	259.97	0.15	64.22	297.12	0.18	0.12333333333333334	0.15000000000000002	-0.026666666666666686	0.2487188825287331	0.4183343831564016	N
AT1G04467|AT1G04467|1|+	24559.5	1969062	1:1968861-1969332	6.73	127.43	0.05	2.06	144.12	0.01	4.78	139.81	0.03	0.54	123.06	0.00	2.50	140.67	0.02	6.88	162.19	0.04	0.40	95.28	0.00	3.85	70.58	0.05	0.00	82.45	0.00	10.47	74.52	0.12	0.61	77.27	0.01	1.58	65.55	0.02	0.024999999999999998	0.03333333333333333	-0.008333333333333335	1.0	1.0	N
AT1G04480|AT1G04480|1|+	38792.0	1217334	1:1217133-1217471	102.87	386.48	0.21	89.34	422.59	0.17	82.02	405.39	0.17	95.01	294.84	0.24	81.91	329.08	0.20	115.49	397.83	0.22	172.15	752.38	0.19	231.87	1080.76	0.18	141.90	894.00	0.14	197.85	1020.70	0.16	239.69	1150.89	0.17	213.99	916.35	0.19	0.20166666666666666	0.17166666666666666	0.03	0.15303690989826318	0.28644335536994564	N
AT1G04487|AT1G04487|1|-	2294.1	2035956	1:2035824-2036257	230.05	52.55	0.81	269.24	14.42	0.95	256.52	72.99	0.78	179.16	116.13	0.61	203.20	129.28	0.61	255.16	74.65	0.77	317.33	35.56	0.90	231.73	22.37	0.91	223.96	88.49	0.72	288.44	11.98	0.96	221.90	52.51	0.81	190.22	61.52	0.76	0.7549999999999999	0.8433333333333334	-0.08833333333333349	0.0059185825524634625	0.019597785679383348	N
AT1G04510|AT1G04510|1|+	1110.9	1230700	1:1230465-1230947	26.88	136.65	0.16	20.70	114.44	0.15	27.51	130.59	0.17	33.11	142.29	0.19	32.99	123.42	0.21	16.13	104.52	0.13	23.79	168.68	0.12	61.73	138.37	0.31	51.73	192.73	0.21	33.57	192.75	0.15	28.14	180.50	0.13	58.26	136.69	0.30	0.1683333333333333	0.20333333333333334	-0.03500000000000003	0.5855822999461446	0.7644418437420966	N
AT1G04530|AT1G04530|1|-	2081.2	1234303	1:1234176-1234504	69.20	117.17	0.37	63.07	173.18	0.27	42.03	124.00	0.25	42.75	153.02	0.22	50.48	133.86	0.27	34.11	124.59	0.21	139.88	167.12	0.46	237.02	207.90	0.53	173.09	191.26	0.48	214.32	192.96	0.53	229.72	196.87	0.54	215.19	179.85	0.54	0.265	0.5133333333333333	-0.2483333333333333	1.3585893613949666e-08	1.5481998261676357e-07	N
AT1G04550|AT1G04550|1|+	1496.6	1241962	1:1241761-1242157	49.62	95.96	0.34	112.85	83.88	0.57	47.57	99.47	0.32	27.49	114.21	0.19	58.11	99.36	0.37	32.75	75.83	0.30	44.15	118.07	0.27	120.14	80.90	0.60	60.14	98.30	0.38	62.73	105.73	0.37	118.20	58.54	0.67	78.84	112.79	0.41	0.34833333333333333	0.45	-0.10166666666666668	0.1125380253497133	0.22440532300553626	N
AT1G04590|AT1G04590|1|-	1149.4	1258698	1:1258556-1258899	28.94	77.45	0.27	21.81	81.07	0.21	20.63	81.15	0.20	16.30	75.56	0.18	14.00	72.68	0.16	42.65	86.46	0.33	14.69	65.91	0.18	26.83	78.42	0.25	25.81	83.25	0.24	72.15	43.62	0.62	56.56	84.94	0.40	40.82	64.19	0.39	0.22499999999999998	0.3466666666666667	-0.1216666666666667	0.05178835820202257	0.12168361104242867	N
AT1G04620|AT1G04620|1|-	99.8	1282747	1:1282163-1282959	2.40	36.70	0.06	0.71	31.59	0.02	NA	NA	NA	0.00	37.16	0.00	NA	NA	NA	0.71	31.97	0.02	1.16	43.34	0.03	0.67	33.04	0.02	0.51	36.30	0.01	2.71	39.14	0.06	1.41	91.83	0.02	4.42	59.81	0.07	0.025	0.034999999999999996	-0.009999999999999995	1.0	1.0	N
AT1G04630|AT1G04630|1|-	1394.2	1289864	1:1289734-1290065	88.24	139.34	0.39	95.11	116.85	0.45	65.86	134.98	0.33	96.37	94.04	0.51	90.75	123.74	0.42	93.57	146.12	0.39	199.67	101.22	0.66	239.90	206.45	0.54	237.27	81.88	0.74	221.87	187.98	0.54	303.59	150.93	0.67	204.12	187.00	0.52	0.41500000000000004	0.6116666666666667	-0.19666666666666666	7.921331716078568e-06	5.5354622547589826e-05	N
AT1G04680|AT1G04680|1|-	2185.1	1304076	1:1303467-1304279	82.38	160.13	0.34	79.94	148.32	0.35	99.93	239.47	0.29	99.72	154.39	0.39	76.20	146.83	0.34	91.97	145.20	0.39	135.52	244.99	0.36	82.78	134.79	0.38	85.30	271.63	0.24	86.28	196.33	0.31	141.58	109.70	0.56	126.64	132.70	0.49	0.35000000000000003	0.38999999999999996	-0.039999999999999925	0.5315305613121317	0.714984870994461	N
AT1G04690|AT1G04690|1|+	10570.1	1315508	1:1315307-1315823	151.39	332.29	0.31	138.19	409.77	0.25	123.41	283.03	0.30	142.66	377.60	0.27	149.81	257.16	0.37	212.36	293.62	0.42	166.77	364.51	0.31	252.68	464.94	0.35	214.95	387.48	0.36	254.70	431.75	0.37	348.51	315.88	0.52	206.04	375.72	0.35	0.32	0.3766666666666667	-0.0566666666666667	0.03619863614440095	0.09003901060498427	N
AT1G04710|AT1G04710|1|+	1293.1	1324681	1:1324480-1324840	28.76	105.75	0.21	29.97	113.03	0.21	26.53	75.14	0.26	40.67	58.47	0.41	18.69	68.57	0.21	9.34	63.29	0.13	7.41	88.89	0.08	21.18	138.39	0.13	19.70	124.93	0.14	25.95	118.34	0.18	23.02	138.81	0.14	21.89	119.07	0.16	0.23833333333333329	0.13833333333333334	0.09999999999999995	0.044380727956656534	0.10708035214493522	N
AT1G04737|AT1G04737|1|-	1431.3	3202573	1:3202274-3202774	2.73	32.06	0.08	0.36	33.64	0.01	0.22	44.89	0.00	0.00	38.69	0.00	1.67	35.30	0.05	1.07	34.67	0.03	0.00	34.50	0.00	NA	NA	NA	0.00	41.68	0.00	0.00	39.80	0.00	0.00	39.56	0.00	0.00	33.25	0.00	0.028333333333333335	0.0	0.028333333333333335	1.0	1.0	N
AT1G04750|AT1G04750|1|-	13662.3	1331799	1:1331466-1332000	63.75	320.40	0.17	64.65	320.97	0.17	69.48	382.38	0.15	70.23	318.51	0.18	70.91	271.09	0.21	56.66	358.81	0.14	117.33	480.89	0.20	208.55	498.92	0.29	158.20	450.70	0.26	152.04	457.57	0.25	151.94	506.77	0.23	185.20	513.76	0.26	0.17	0.24833333333333332	-0.07833333333333331	0.0011500867123730846	0.004769787838418757	N
AT1G04770|AT1G04770|1|-	3365.1	1336785	1:1336704-1336986	172.23	31.44	0.85	163.19	35.74	0.82	214.15	54.26	0.80	173.72	50.26	0.78	190.73	11.03	0.95	196.24	1.53	0.99	302.31	0.00	1.00	222.66	66.01	0.77	194.54	46.55	0.81	232.15	49.63	0.82	255.11	46.09	0.85	266.03	43.98	0.86	0.8650000000000001	0.8516666666666667	0.01333333333333342	0.897858714357455	1.0	N
AT1G04773|AT1G04773|1|+	113.7	3306149	1:3305948-3306688	8.32	29.85	0.22	6.14	36.87	0.14	7.61	40.68	0.16	1.87	44.31	0.04	4.40	40.19	0.10	7.04	54.49	0.11	8.52	53.10	0.14	NA	NA	NA	8.83	43.36	0.17	2.70	50.67	0.05	NA	NA	NA	5.08	33.21	0.13	0.12833333333333333	0.12250000000000001	0.005833333333333315	1.0	1.0	N
AT1G04780|AT1G04780|1|-	2384.3	1340791	1:1340565-1341259	80.76	147.26	0.35	50.11	142.40	0.26	70.03	155.54	0.31	50.38	158.02	0.24	56.52	167.31	0.25	59.84	182.83	0.25	110.16	103.53	0.52	107.76	127.55	0.46	112.42	139.37	0.45	115.59	143.38	0.45	155.25	77.43	0.67	155.04	86.45	0.64	0.27666666666666667	0.5316666666666666	-0.25499999999999995	5.084190791096214e-08	5.25172597620822e-07	N
AT1G04790|AT1G04790|1|+	449.6	1348329	1:1348081-1348452	46.82	52.72	0.47	53.01	47.23	0.53	20.46	86.59	0.19	26.93	72.19	0.27	47.98	22.33	0.68	61.35	62.62	0.49	80.32	17.74	0.82	66.22	40.12	0.62	108.64	45.02	0.71	101.35	24.30	0.81	120.65	4.33	0.97	160.47	0.00	1.00	0.4383333333333333	0.8216666666666667	-0.38333333333333336	1.1397433061569881e-10	1.7370596983561335e-09	N
AT1G04810|AT1G04810|1|+	1465.2	1355179	1:1354914-1355466	108.37	149.64	0.42	83.41	167.45	0.33	105.61	152.50	0.41	131.69	100.99	0.57	79.58	151.79	0.34	95.92	137.73	0.41	91.58	109.75	0.45	155.40	56.79	0.73	93.80	159.69	0.37	111.57	112.10	0.50	131.86	47.88	0.73	148.54	44.38	0.77	0.41333333333333333	0.5916666666666667	-0.17833333333333334	0.0003462009088728784	0.0016563304918005741	N
AT1G04820|AT1G04820|1|-	112223.9	1356362	1:1356084-1357074	918.62	433.56	0.68	979.43	254.60	0.79	903.12	631.53	0.59	696.75	501.18	0.58	679.12	534.74	0.56	576.24	624.73	0.48	1181.91	486.00	0.71	1633.30	208.43	0.89	1387.90	588.93	0.70	1456.81	214.99	0.87	1821.97	37.68	0.98	1737.27	163.63	0.91	0.6133333333333334	0.8433333333333334	-0.22999999999999998	2.5936917636527375e-47	2.7418633037677927e-45	N
AT1G04830|AT1G04830|1|-	520.7	1359035	1:1358574-1359251	6.39	107.73	0.06	3.93	87.14	0.04	3.85	116.55	0.03	1.12	40.96	0.03	4.28	97.67	0.04	2.80	132.54	0.02	5.10	94.23	0.05	17.66	182.97	0.09	3.59	123.22	0.03	1.83	111.51	0.02	4.41	96.91	0.04	3.08	174.13	0.02	0.03666666666666667	0.041666666666666664	-0.0049999999999999975	1.0	1.0	N
AT1G04850|AT1G04850|1|-	2129.6	1365250	1:1365107-1365487	180.67	180.18	0.50	177.57	174.61	0.50	160.40	184.07	0.47	227.69	93.24	0.71	187.95	117.23	0.62	224.13	162.55	0.58	260.47	167.69	0.61	288.32	237.13	0.55	303.05	279.29	0.52	365.59	198.63	0.65	381.37	268.48	0.59	336.54	236.54	0.59	0.5633333333333334	0.585	-0.021666666666666612	0.5329721014877935	0.715985368728431	N
AT1G04853|AT1G04853|1|-	12763.2	3874694	1:3874538-3874895	12.92	30.83	0.30	5.19	43.74	0.11	10.50	46.70	0.18	10.08	20.14	0.33	6.93	37.99	0.15	16.56	31.27	0.35	8.39	50.73	0.14	15.50	57.08	0.21	11.89	43.38	0.22	10.55	58.57	0.15	2.79	64.47	0.04	8.53	58.82	0.13	0.23666666666666666	0.14833333333333334	0.08833333333333332	0.31086663269334597	0.49367641510199833	N
AT1G04860|AT1G04860|1|-	798.0	1369217	1:1369036-1369546	40.93	73.20	0.36	26.95	61.46	0.30	17.61	72.76	0.19	43.85	75.39	0.37	31.48	72.16	0.30	23.40	95.22	0.20	30.12	111.84	0.21	63.05	124.28	0.34	20.05	98.50	0.17	37.11	118.21	0.24	60.44	91.82	0.40	38.60	119.00	0.24	0.2866666666666666	0.26666666666666666	0.019999999999999962	0.8872494985802757	0.9996143160308616	N
AT1G04870|AT1G04870|1|-	746.4	1373423	1:1373234-1373661	29.98	109.62	0.21	32.11	64.05	0.33	27.04	77.61	0.26	15.62	79.72	0.16	14.00	74.29	0.16	21.14	82.03	0.20	31.52	123.16	0.20	61.42	129.91	0.32	59.26	128.79	0.32	45.89	86.76	0.35	59.36	113.25	0.34	49.55	142.64	0.26	0.22	0.29833333333333334	-0.07833333333333334	0.2068295799301928	0.36184252390252214	N
AT1G04910|AT1G04910|1|-	2099.9	1388125	1:1387895-1388715	94.48	35.40	0.73	86.39	24.56	0.78	110.95	21.89	0.84	103.67	12.36	0.89	80.04	29.81	0.73	159.94	0.00	1.00	89.00	49.71	0.64	142.54	0.00	1.00	138.73	17.44	0.89	96.31	13.50	0.88	150.56	8.52	0.95	151.91	0.00	1.00	0.8283333333333335	0.8933333333333334	-0.06499999999999995	0.14480371651745366	0.274602009739301	N
AT1G04940|AT1G04940|1|+	6374.8	1400592	1:1399979-1400830	118.50	149.33	0.44	124.37	106.90	0.54	130.19	113.67	0.53	116.37	125.67	0.48	109.42	120.53	0.48	98.39	153.94	0.39	214.04	213.48	0.50	295.80	206.00	0.59	229.28	275.50	0.45	277.85	127.48	0.69	329.84	176.43	0.65	339.05	120.42	0.74	0.4766666666666666	0.6033333333333332	-0.12666666666666654	0.0014779086408884046	0.005936126986462439	N
AT1G04950|AT1G04950|1|-	1150.9	1403239	1:1403112-1403440	25.20	66.78	0.27	26.02	97.05	0.21	40.01	77.06	0.34	11.57	85.67	0.12	32.64	52.17	0.38	17.28	82.04	0.17	31.79	109.65	0.22	35.28	100.53	0.26	49.47	123.31	0.29	23.53	119.47	0.16	59.20	113.07	0.34	31.30	119.68	0.21	0.24833333333333332	0.24666666666666667	0.0016666666666666496	1.0	1.0	N
AT1G04960|AT1G04960|1|-	836.3	1407903	1:1407772-1408200	32.28	62.67	0.34	39.75	75.72	0.34	25.44	78.31	0.25	20.62	72.10	0.22	27.70	87.43	0.24	21.70	55.34	0.28	49.46	89.65	0.36	62.69	129.06	0.33	38.88	120.09	0.24	56.03	97.85	0.36	114.17	45.67	0.71	66.01	99.14	0.40	0.2783333333333334	0.39999999999999997	-0.12166666666666659	0.04508284754288969	0.10836677697960688	N
AT1G04970|AT1G04970|1|+	636.0	1413441	1:1413240-1413627	87.25	86.12	0.50	68.03	88.60	0.43	66.70	92.69	0.42	46.22	125.80	0.27	75.22	68.27	0.52	115.26	79.88	0.59	69.13	118.52	0.37	112.33	146.24	0.43	123.53	95.66	0.56	141.93	69.11	0.67	115.14	108.86	0.51	186.23	12.78	0.94	0.4549999999999999	0.58	-0.12500000000000006	0.02310376218315377	0.06198220432343386	N
AT1G04980|AT1G04980|1|-	115.7	1413815	1:1413644-1414055	7.53	29.51	0.20	8.26	43.52	0.16	6.51	42.22	0.13	16.56	26.98	0.38	9.77	31.66	0.24	13.09	55.64	0.19	26.94	27.91	0.49	25.00	38.43	0.39	2.78	41.75	0.06	16.38	37.17	0.31	17.96	37.56	0.32	29.78	31.56	0.49	0.21666666666666665	0.3433333333333333	-0.12666666666666668	0.12760154378753838	0.24847498827618203	N
AT1G04985|AT1G04985|1|-	10795.0	1416513	1:1416342-1416779	98.57	179.30	0.35	94.12	221.08	0.30	100.33	205.73	0.33	77.07	121.85	0.39	137.54	150.20	0.48	122.18	122.68	0.50	157.02	227.80	0.41	278.18	163.76	0.63	228.62	184.05	0.55	158.10	253.42	0.38	235.35	176.31	0.57	237.56	268.78	0.47	0.39166666666666666	0.5016666666666666	-0.10999999999999993	0.002358596820383161	0.008911550039599798	N
AT1G05000|AT1G05000|1|+	345.7	1428604	1:1428208-1428869	15.63	45.07	0.26	12.00	62.01	0.16	24.78	44.32	0.36	29.39	12.49	0.70	5.56	58.64	0.09	48.78	41.42	0.54	24.97	31.87	0.44	15.55	48.20	0.24	18.23	39.43	0.32	59.10	25.24	0.70	29.96	26.62	0.53	46.17	47.53	0.49	0.35166666666666674	0.4533333333333333	-0.10166666666666657	0.15771021460523582	0.2926001498379814	N
AT1G05010|AT1G05010|1|-	141839.4	1431464	1:1431177-1431724	407.94	1502.12	0.21	473.22	1790.13	0.21	532.98	1966.46	0.21	397.10	1333.03	0.23	427.61	1659.64	0.20	508.61	1516.61	0.25	781.29	1823.93	0.30	967.96	1838.10	0.34	734.34	1733.89	0.30	969.20	2513.44	0.28	982.12	1768.46	0.36	1263.33	2805.55	0.31	0.21833333333333335	0.315	-0.09666666666666665	1.0101532706854458e-13	2.1916797054151254e-12	N
AT1G05030|AT1G05030|1|-	91.7	1438311	1:1438048-1438515	25.18	26.77	0.48	8.66	46.81	0.16	14.94	33.66	0.31	7.22	31.02	0.19	19.36	23.77	0.45	23.26	58.72	0.28	17.20	25.44	0.40	42.38	26.45	0.62	22.57	9.80	0.70	48.28	26.84	0.64	43.90	61.99	0.41	16.94	39.03	0.30	0.31166666666666665	0.5116666666666666	-0.19999999999999996	0.05564646696653592	0.12913567077217827	N
AT1G05047|AT1G05047|1|+	12993.6	4806006	1:4805708-4806123	149.35	4.06	0.97	141.24	28.11	0.83	133.37	8.09	0.94	75.51	52.40	0.59	98.14	47.01	0.68	157.44	60.67	0.72	155.58	23.59	0.87	236.90	0.00	1.00	200.70	49.34	0.80	144.64	66.44	0.69	186.21	8.66	0.96	220.07	27.13	0.89	0.7883333333333332	0.8683333333333333	-0.08000000000000007	0.050298408267875655	0.1186758440880069	N
AT1G05055|AT1G05055|1|-	228.9	1448860	1:1448631-1449061	11.98	40.10	0.23	6.12	58.67	0.09	7.74	42.21	0.15	0.65	39.31	0.02	10.72	32.49	0.25	4.24	41.00	0.09	15.89	31.34	0.34	25.77	33.72	0.43	10.16	33.48	0.23	45.85	22.82	0.67	19.64	54.59	0.26	36.63	21.61	0.63	0.13833333333333334	0.4266666666666667	-0.28833333333333333	0.0005199382099549244	0.0023667549208988017	N
AT1G05060|AT1G05060|1|-	1199.6	1451161	1:1451002-1451362	41.76	84.77	0.33	36.90	68.35	0.35	39.84	72.98	0.35	26.07	66.57	0.28	35.21	55.54	0.39	46.25	99.70	0.32	35.08	69.28	0.34	59.99	91.74	0.40	56.78	75.56	0.43	92.10	28.98	0.76	99.35	106.26	0.48	94.80	70.06	0.58	0.3366666666666666	0.49833333333333335	-0.16166666666666674	0.007836086511191841	0.02492547748454332	N
AT1G05070|AT1G05070|1|-	1140.7	1457154	1:1457007-1457518	86.03	52.37	0.62	78.35	72.06	0.52	75.09	92.96	0.45	47.33	71.45	0.40	65.98	96.94	0.40	74.72	71.58	0.51	136.51	74.25	0.65	136.41	106.04	0.56	128.73	113.65	0.53	147.02	98.01	0.60	99.41	167.04	0.37	181.62	76.05	0.70	0.4833333333333334	0.5683333333333334	-0.08499999999999996	0.11633967161902721	0.23070591037283444	N
AT1G05090|AT1G05090|1|+	185.7	1465728	1:1465448-1465875	12.49	35.72	0.26	8.43	32.47	0.21	9.55	43.13	0.18	5.16	56.35	0.08	2.92	42.53	0.06	11.79	47.73	0.20	14.11	40.84	0.26	15.96	41.39	0.28	19.91	28.25	0.41	23.66	27.46	0.46	3.45	52.33	0.06	20.88	56.12	0.27	0.16499999999999995	0.29	-0.12500000000000003	0.1665228956948998	0.30547129675470175	N
AT1G05120|AT1G05120|1|-	869.5	1471495	1:1471323-1471696	7.19	57.60	0.11	11.07	55.68	0.17	5.74	51.13	0.10	0.79	50.97	0.02	11.48	64.46	0.15	6.10	57.24	0.10	23.22	69.75	0.25	25.94	128.08	0.17	18.06	98.40	0.16	5.51	153.30	0.03	18.63	118.60	0.14	17.84	150.60	0.11	0.10833333333333334	0.14333333333333334	-0.035	0.8195493778254962	0.9573130560070479	N
AT1G05160|AT1G05160|1|-	158.2	1487522	1:1487378-1487730	19.14	29.03	0.40	20.79	20.78	0.50	19.60	16.15	0.55	7.60	32.55	0.19	NA	NA	NA	21.36	14.37	0.60	25.59	14.49	0.64	NA	NA	NA	28.31	13.98	0.67	15.45	15.10	0.51	NA	NA	NA	43.34	2.98	0.94	0.44800000000000006	0.69	-0.24199999999999988	0.021258788560254805	0.057768285016701885	N
AT1G05170|AT1G05170|1|-	2119.4	1491848	1:1490974-1492049	71.61	0.00	1.00	71.76	0.00	1.00	61.96	0.00	1.00	59.96	9.67	0.86	52.81	0.00	1.00	55.04	0.00	1.00	38.77	0.00	1.00	56.50	0.00	1.00	57.81	0.00	1.00	63.20	0.00	1.00	56.74	0.00	1.00	34.75	0.00	1.00	0.9766666666666666	1.0	-0.023333333333333428	1.0	1.0	N
AT1G05180|AT1G05180|1|-	3245.3	1498545	1:1498114-1498746	40.61	56.65	0.42	46.74	72.50	0.39	33.14	61.52	0.35	30.23	62.49	0.33	47.39	61.53	0.44	48.67	88.40	0.36	68.75	103.08	0.40	95.81	84.80	0.53	54.51	62.98	0.46	55.96	94.72	0.37	80.26	73.79	0.52	75.51	67.54	0.53	0.38166666666666665	0.46833333333333343	-0.08666666666666678	0.1651557868028494	0.3034192267082134	N
AT1G05190|AT1G05190|1|-	294336.1	1502594	1:1502251-1502851	800.52	1705.32	0.32	847.73	1966.95	0.30	726.74	1728.14	0.30	735.05	1799.66	0.29	733.36	1831.48	0.29	702.03	1791.14	0.28	943.88	2054.70	0.31	1393.05	2363.60	0.37	1040.65	2353.81	0.31	1203.09	2019.66	0.37	1412.01	2590.50	0.35	1276.08	2362.06	0.35	0.2966666666666667	0.3433333333333333	-0.046666666666666634	3.9401050112529866e-05	0.00023430774085470333	N
AT1G05205|AT1G05205|1|-	1813.0	1509235	1:1509152-1509436	20.74	60.61	0.25	5.18	55.70	0.09	20.53	67.29	0.23	14.67	63.06	0.19	25.42	91.18	0.22	7.45	67.94	0.10	27.53	84.53	0.25	28.24	118.37	0.19	16.33	154.04	0.10	6.71	91.50	0.07	39.57	149.47	0.21	26.58	107.34	0.20	0.18000000000000002	0.17	0.010000000000000009	0.8557546863223751	0.9793428904739654	N
AT1G05207|AT1G05207|1|+	377735358.2	5447435	1:5447234-5447569	20582.29	0.00	1.00	21411.46	0.00	1.00	20116.33	0.00	1.00	21369.12	0.00	1.00	22064.49	0.00	1.00	22511.73	0.00	1.00	20211.89	0.00	1.00	23503.79	0.00	1.00	23335.79	0.00	1.00	20511.45	0.00	1.00	22960.44	0.00	1.00	21768.74	0.00	1.00	1.0	1.0	0.0	1.0	1.0	N
AT1G05230|AT1G05230|1|-	258.8	1513062	1:1512896-1513293	24.55	33.52	0.42	55.52	0.00	1.00	34.99	31.00	0.53	43.12	16.50	0.72	39.80	26.84	0.60	35.83	18.60	0.66	35.73	37.48	0.49	58.01	22.69	0.72	46.68	52.23	0.47	20.37	64.20	0.24	40.51	44.74	0.48	47.72	52.20	0.48	0.655	0.48	0.17500000000000004	0.06177241295521316	0.1404329598572302	N
AT1G05253|AT1G05253|1|-	6155.8	5723243	1:5723094-5723466	633.69	262.86	0.71	704.01	181.83	0.79	639.66	265.95	0.71	665.26	210.57	0.76	651.67	308.69	0.68	719.68	193.34	0.79	700.66	374.56	0.65	502.49	384.35	0.57	465.56	534.65	0.47	411.00	288.13	0.59	393.16	320.82	0.55	382.38	277.82	0.58	0.7399999999999999	0.5683333333333334	0.17166666666666652	6.619487833542114e-14	1.4682555937925892e-12	N
AT1G05260|AT1G05260|1|+	559.6	1531246	1:1530856-1531484	80.21	58.90	0.58	69.17	46.09	0.60	102.73	33.52	0.75	92.50	9.47	0.91	83.68	83.18	0.50	87.03	80.53	0.52	80.41	32.50	0.71	90.16	20.71	0.81	75.59	25.22	0.75	87.77	0.00	1.00	60.41	40.41	0.60	84.84	0.00	1.00	0.6433333333333333	0.8116666666666666	-0.16833333333333333	0.0036512641993898093	0.012962705376683292	N
AT1G05270|AT1G05270|1|-	1213.9	1531733	1:1531641-1531934	57.29	90.99	0.39	68.98	59.97	0.53	64.66	82.75	0.44	49.82	55.89	0.47	41.06	79.88	0.34	64.86	78.11	0.45	80.08	100.54	0.44	95.72	131.46	0.42	76.78	125.24	0.38	101.02	109.97	0.48	98.42	196.36	0.33	74.02	165.08	0.31	0.4366666666666667	0.3933333333333333	0.04333333333333339	0.37309118220082566	0.5636070351975683	N
AT1G05277|AT1G05277|1|+	40350.0	5777472	1:5777100-5777828	0.30	106.47	0.00	0.05	111.84	0.00	0.11	115.79	0.00	0.00	78.70	0.00	0.09	112.17	0.00	0.12	136.11	0.00	0.22	157.63	0.00	0.38	196.48	0.00	0.66	176.87	0.00	1.34	184.31	0.01	0.04	183.13	0.00	0.94	169.19	0.01	0.0	0.0033333333333333335	-0.0033333333333333335	1.0	1.0	N
AT1G05320|AT1G05320|1|+	1073.8	1557626	1:1557425-1557848	20.48	138.32	0.13	14.57	101.15	0.13	24.38	122.91	0.17	43.61	78.54	0.36	22.84	118.48	0.16	30.94	75.99	0.29	34.35	117.50	0.23	56.05	136.02	0.29	33.20	157.13	0.17	38.67	108.21	0.26	34.92	167.71	0.17	45.54	181.79	0.20	0.20666666666666667	0.22	-0.013333333333333336	0.7790307463379474	0.9252307496618595	N
AT1G05337|AT1G05337|1|-	658.1	6142604	1:6142402-6142830	21.69	109.51	0.17	21.85	109.94	0.17	23.54	138.71	0.15	48.44	75.06	0.39	17.99	127.99	0.12	22.76	84.93	0.21	16.79	102.93	0.14	9.61	33.91	0.22	8.10	51.29	0.14	3.98	56.67	0.07	10.33	61.76	0.14	6.25	54.61	0.10	0.20166666666666666	0.135	0.06666666666666665	0.3273712337065452	0.511411405335944	N
AT1G05340|AT1G05340|1|-	8869.9	1558923	1:1558778-1559124	8.08	101.72	0.07	10.66	123.60	0.08	24.48	162.94	0.13	6.06	125.73	0.05	10.78	129.43	0.08	10.49	137.53	0.07	25.87	240.61	0.10	18.46	292.07	0.06	17.33	296.35	0.06	31.17	357.86	0.08	42.56	335.30	0.11	39.72	420.89	0.09	0.08	0.08333333333333333	-0.003333333333333327	1.0	1.0	N
AT1G05350|AT1G05350|1|-	373.5	1560837	1:1560678-1561039	59.73	14.06	0.81	61.24	36.25	0.63	45.93	50.47	0.48	45.26	45.21	0.50	50.14	21.46	0.70	45.11	57.20	0.44	38.44	117.28	0.25	65.70	60.97	0.52	76.60	74.13	0.51	66.74	71.38	0.48	91.56	16.94	0.84	57.37	75.67	0.43	0.5933333333333334	0.505	0.08833333333333337	0.2174067603678923	0.3760251972832804	N
AT1G05360|AT1G05360|1|+	340.7	1567300	1:1567099-1567508	7.36	37.29	0.16	6.20	57.58	0.10	7.31	28.04	0.21	22.02	39.99	0.36	9.71	50.11	0.16	12.91	41.52	0.24	6.68	54.16	0.11	29.07	61.30	0.32	13.95	34.30	0.29	NA	NA	NA	26.22	51.64	0.34	15.78	89.44	0.15	0.205	0.242	-0.037000000000000005	0.6647114761554984	0.8342053471277076	N
AT1G05380|AT1G05380|1|+	582.0	1581763	1:1581378-1582671	102.63	0.15	1.00	101.68	0.95	0.99	92.94	29.18	0.76	111.89	34.64	0.76	100.73	29.58	0.77	116.70	0.00	1.00	94.44	12.71	0.88	91.17	0.00	1.00	70.75	0.00	1.00	98.23	0.00	1.00	73.54	0.00	1.00	85.17	12.59	0.87	0.8799999999999999	0.9583333333333334	-0.07833333333333348	0.052739416890062944	0.12368930508297273	N
AT1G05410|AT1G05410|1|-	405.3	1585730	1:1585421-1585931	43.50	37.85	0.53	54.26	40.22	0.57	57.08	24.96	0.70	86.26	0.00	1.00	47.70	30.84	0.61	72.99	0.00	1.00	59.30	21.17	0.74	135.15	0.00	1.00	89.76	5.88	0.94	127.31	0.00	1.00	111.76	0.00	1.00	107.05	0.00	1.00	0.735	0.9466666666666667	-0.21166666666666667	6.530243340241222e-06	4.63838656697477e-05	N
AT1G05430|AT1G05430|1|-	978.1	1594219	1:1594053-1594430	77.16	71.62	0.52	67.08	93.30	0.42	53.53	87.43	0.38	85.66	75.45	0.53	50.43	128.05	0.28	44.30	131.99	0.25	49.33	140.33	0.26	94.93	112.78	0.46	68.30	127.50	0.35	69.99	118.92	0.37	84.33	144.65	0.37	127.85	117.44	0.52	0.39666666666666667	0.38833333333333336	0.008333333333333304	1.0	1.0	N
AT1G05453|AT1G05453|1|+	583.4	6525656	1:6525324-6525994	98.05	0.00	1.00	79.56	15.89	0.83	87.42	25.29	0.78	141.69	0.00	1.00	95.16	0.00	1.00	117.71	0.00	1.00	106.06	0.00	1.00	77.40	0.00	1.00	75.56	4.51	0.94	96.45	0.00	1.00	54.03	7.37	0.88	82.27	10.16	0.89	0.935	0.9516666666666667	-0.016666666666666607	0.7339492106610259	0.889968745736042	N
AT1G05460|AT1G05460|1|-	335.6	1601761	1:1601214-1601962	51.89	2.50	0.95	48.16	6.35	0.88	53.81	0.00	1.00	51.52	0.00	1.00	36.67	23.40	0.61	30.42	29.27	0.51	69.68	0.00	1.00	68.02	0.00	1.00	68.45	1.23	0.98	55.81	0.00	1.00	73.45	0.00	1.00	57.72	0.00	1.00	0.8250000000000001	0.9966666666666667	-0.17166666666666663	0.0002519954200455464	0.0012501639984985496	N
AT1G05467|AT1G05467|1|+	1127.6	6610272	1:6610071-6610443	26.42	18.07	0.59	35.51	30.69	0.54	47.40	25.32	0.65	54.16	0.00	1.00	33.64	17.75	0.65	62.13	15.58	0.80	40.98	20.34	0.67	15.56	20.35	0.43	33.87	8.60	0.80	24.09	8.58	0.74	24.01	22.28	0.52	NA	NA	NA	0.705	0.632	0.07299999999999995	0.39475718694861	0.58582768320017	N
AT1G05500|AT1G05500|1|+	1195.0	1629120	1:1628794-1629289	48.92	97.73	0.33	50.96	102.45	0.33	53.65	90.53	0.37	78.64	67.69	0.54	46.51	104.43	0.31	47.36	110.85	0.30	72.21	105.78	0.41	131.88	75.97	0.63	84.54	86.70	0.49	113.98	74.35	0.61	113.55	78.55	0.59	72.19	121.38	0.37	0.36333333333333334	0.5166666666666667	-0.15333333333333338	0.0041637464938017125	0.014507415465956387	N
AT1G05520|AT1G05520|1|-	567.5	1630999	1:1630863-1631272	67.66	68.69	0.50	49.98	43.64	0.53	42.27	80.82	0.34	37.00	75.93	0.33	64.67	46.22	0.58	51.18	82.88	0.38	60.34	47.28	0.56	54.11	83.59	0.39	32.18	45.80	0.41	43.73	101.42	0.30	87.10	43.98	0.66	47.04	58.05	0.45	0.44333333333333336	0.4616666666666667	-0.018333333333333368	0.7937651331272275	0.9362188875828202	N
AT1G05570|AT1G05570|1|-	393.9	1647822	1:1647575-1648128	11.44	68.83	0.14	16.20	70.17	0.19	9.65	77.09	0.11	4.33	67.40	0.06	6.74	119.11	0.05	7.19	119.67	0.06	15.41	72.63	0.18	25.56	52.70	0.33	22.45	55.53	0.29	4.47	89.37	0.05	5.17	83.00	0.06	8.89	64.96	0.12	0.10166666666666668	0.17166666666666672	-0.07000000000000003	0.25367482242275113	0.4246574646925334	N
AT1G05590|AT1G05590|1|+	540.3	1670935	1:1670734-1671902	68.52	2.09	0.97	72.20	0.00	1.00	72.23	0.00	1.00	67.14	0.00	1.00	67.83	0.00	1.00	67.97	4.97	0.93	73.48	0.00	1.00	73.77	0.00	1.00	72.55	0.00	1.00	64.76	0.00	1.00	72.42	0.00	1.00	48.43	0.00	1.00	0.9833333333333333	1.0	-0.01666666666666672	1.0	1.0	N
AT1G05620|AT1G05620|1|+	292.1	1681620	1:1681419-1681710	39.82	23.24	0.63	38.04	28.17	0.57	46.01	35.84	0.56	61.58	31.55	0.66	40.27	35.38	0.53	55.88	29.04	0.66	79.73	24.29	0.77	40.55	47.65	0.46	36.17	104.45	0.26	41.30	76.13	0.35	45.34	30.76	0.60	60.09	71.45	0.46	0.6016666666666667	0.48333333333333334	0.11833333333333335	0.053562500396910864	0.12514708827747548	N
AT1G05680|AT1G05680|1|-	2426.6	1703258	1:1703002-1703912	248.05	151.35	0.62	231.40	242.57	0.49	115.92	112.22	0.51	356.21	278.82	0.56	249.38	294.62	0.46	277.73	176.99	0.61	34.37	69.37	0.33	38.27	20.03	0.66	16.62	31.67	0.34	45.41	67.10	0.40	79.15	25.65	0.76	76.03	60.99	0.55	0.5416666666666666	0.5066666666666667	0.03499999999999992	0.732303276126815	0.8890418281698031	N
AT1G05703|AT1G05703|1|-	1586.5	7772381	1:7772133-7772582	0.00	38.53	0.00	0.00	41.96	0.00	0.55	43.90	0.01	NA	NA	NA	0.00	35.93	0.00	0.98	61.40	0.02	0.00	62.35	0.00	0.00	60.39	0.00	0.00	49.59	0.00	0.00	68.10	0.00	0.00	50.85	0.00	0.00	58.14	0.00	0.006	0.0	0.006	1.0	1.0	N
AT1G05710|AT1G05710|1|+	400.3	1717162	1:1716862-1717290	31.40	27.50	0.53	40.62	31.94	0.56	26.75	31.61	0.46	16.00	42.15	0.28	30.25	23.54	0.56	37.18	46.79	0.44	62.02	0.00	1.00	64.95	0.00	1.00	38.30	0.00	1.00	29.12	35.30	0.45	81.81	0.00	1.00	46.30	18.58	0.71	0.4716666666666667	0.86	-0.3883333333333333	3.280158404777489e-06	2.4768186981971055e-05	N
AT1G05720|AT1G05720|1|-	1032.4	1717529	1:1717389-1717730	49.58	83.28	0.37	56.32	102.01	0.36	45.18	82.81	0.35	25.50	71.66	0.26	49.63	91.73	0.35	15.61	99.33	0.14	31.24	111.51	0.22	40.41	124.10	0.25	61.05	132.55	0.32	35.50	144.45	0.20	46.08	159.42	0.22	40.17	120.85	0.25	0.305	0.24333333333333332	0.061666666666666675	0.19116709626322387	0.3403740253660017	N
AT1G05773|AT1G05773|1|-	31641.9	8079794	1:8079512-8079995	4.54	66.62	0.06	2.84	87.51	0.03	9.10	65.06	0.12	2.02	86.64	0.02	8.88	76.29	0.10	6.94	81.11	0.08	17.34	79.72	0.18	5.34	105.18	0.05	8.62	75.82	0.10	2.52	74.68	0.03	7.73	80.58	0.09	1.39	96.76	0.01	0.06833333333333333	0.07666666666666666	-0.008333333333333331	0.7711071973411732	0.9187640551533859	N
AT1G05780|AT1G05780|1|+	296.0	1728158	1:1727957-1728520	27.54	23.14	0.54	11.44	53.92	0.18	19.88	27.83	0.42	26.86	21.31	0.56	33.28	7.68	0.81	28.74	49.32	0.37	45.71	46.47	0.50	46.26	10.02	0.82	38.90	14.90	0.72	51.29	0.00	1.00	73.91	0.00	1.00	69.71	15.80	0.82	0.48	0.81	-0.33000000000000007	0.00011926662246278855	0.0006402768381484224	N
AT1G05785|AT1G05785|1|+	1008.5	1732215	1:1732014-1732657	35.86	0.00	1.00	20.74	10.27	0.67	NA	NA	NA	NA	NA	NA	NA	NA	NA	28.82	2.66	0.92	32.69	0.00	1.00	40.53	0.00	1.00	58.23	0.00	1.00	38.80	0.00	1.00	39.42	0.00	1.00	48.08	0.00	1.00	0.8633333333333333	1.0	-0.13666666666666671	0.031252552958128864	0.07971165778873884	N
AT1G05790|AT1G05790|1|+	1274.8	1737488	1:1737287-1737583	0.72	40.65	0.02	1.25	63.66	0.02	0.90	45.24	0.02	0.00	39.51	0.00	0.06	44.58	0.00	NA	NA	NA	0.00	46.34	0.00	0.00	48.39	0.00	0.00	45.27	0.00	0.00	62.07	0.00	0.00	76.05	0.00	0.00	90.61	0.00	0.012	0.0	0.012	1.0	1.0	N
AT1G05805|AT1G05805|1|+	1587.7	1747572	1:1747371-1747734	19.95	51.88	0.28	7.86	60.37	0.12	30.30	74.03	0.29	15.14	46.69	0.24	21.65	74.53	0.23	15.85	67.35	0.19	54.87	74.38	0.42	58.60	124.00	0.32	39.14	100.07	0.28	75.80	153.47	0.33	122.84	40.20	0.75	93.62	116.57	0.45	0.22499999999999998	0.42500000000000004	-0.20000000000000007	0.0030127300408210487	0.011018586093352507	N
AT1G05810|AT1G05810|1|+	467.5	1749260	1:1749028-1749526	33.69	40.11	0.46	48.49	37.55	0.56	49.18	63.20	0.44	33.52	69.09	0.33	53.95	0.00	1.00	46.18	36.64	0.56	48.54	43.67	0.53	67.86	21.37	0.76	57.89	0.58	0.99	59.08	85.63	0.41	39.68	29.67	0.57	69.11	49.97	0.58	0.5583333333333333	0.64	-0.08166666666666667	0.29432745375863023	0.47348743856232944	N
AT1G05830|AT1G05830|1|+	3733.1	1761381	1:1761084-1761909	66.33	13.82	0.83	84.90	8.77	0.91	65.09	18.23	0.78	65.89	5.26	0.93	61.32	10.47	0.85	63.57	40.26	0.61	86.63	0.00	1.00	99.32	0.00	1.00	94.31	40.37	0.70	90.70	0.00	1.00	96.39	3.64	0.96	112.93	0.00	1.00	0.8183333333333334	0.9433333333333334	-0.125	0.013214777666071615	0.03863349387106609	N
AT1G05833|AT1G05833|1|-	2311.4	8421427	1:8420941-8421628	NA	NA	NA	NA	NA	NA	NA	NA	NA	NA	NA	NA	NA	NA	NA	NA	NA	NA	NA	NA	NA	NA	NA	NA	NA	NA	NA	1.63	28.59	0.05	NA	NA	NA	NA	NA	NA	NA	NA	NA	NA	NA	N
AT1G05850|AT1G05850|1|-	137081.5	1766727	1:1766503-1767250	715.51	1097.26	0.39	633.28	1015.28	0.38	714.29	1469.92	0.33	629.79	1119.40	0.36	575.93	1131.37	0.34	616.34	1114.76	0.36	1208.03	2060.80	0.37	1890.82	1779.82	0.52	1323.94	2193.92	0.38	1525.30	1873.56	0.45	1669.20	1656.55	0.50	1900.16	1678.99	0.53	0.36000000000000004	0.4583333333333333	-0.09833333333333327	3.1539949005024387e-12	5.902306464461908e-11	N
AT1G05860|AT1G05860|1|+	257.2	1770403	1:1770085-1771286	11.56	37.74	0.23	14.46	45.86	0.24	12.88	39.86	0.24	11.47	63.79	0.15	14.25	29.51	0.33	15.28	43.04	0.26	26.30	42.50	0.38	24.31	31.67	0.43	20.02	62.18	0.24	25.32	57.97	0.30	26.02	48.87	0.35	35.71	45.98	0.44	0.24166666666666667	0.3566666666666667	-0.11500000000000002	0.17715824745594652	0.3207180734140537	N
AT1G05870|AT1G05870|1|-	5085.8	1772308	1:1771385-1772533	104.60	343.27	0.23	88.00	384.69	0.19	89.52	412.27	0.18	66.76	270.26	0.20	103.15	316.07	0.25	121.53	291.64	0.29	82.15	314.82	0.21	99.66	392.61	0.20	105.49	302.61	0.26	80.44	342.42	0.19	96.87	402.01	0.19	105.70	419.29	0.20	0.22333333333333336	0.20833333333333334	0.015000000000000013	0.682556045375893	0.848484835973652	N
AT1G05890|AT1G05890|1|+	10053.5	1784392	1:1783983-1784675	79.79	312.79	0.20	68.99	285.36	0.19	84.67	316.64	0.21	88.42	238.88	0.27	58.07	334.73	0.15	59.53	293.35	0.17	86.23	312.12	0.22	151.43	319.44	0.32	92.15	376.51	0.20	99.49	398.36	0.20	120.83	351.41	0.26	167.88	313.99	0.35	0.19833333333333333	0.2583333333333333	-0.05999999999999997	0.047276367326152174	0.11287488277750461	N
AT1G05900|AT1G05900|1|+	997.2	1789561	1:1789359-1789737	73.71	67.48	0.52	80.13	87.86	0.48	52.94	72.67	0.42	48.86	100.21	0.33	44.85	100.61	0.31	33.74	109.06	0.24	86.44	65.32	0.57	111.53	98.48	0.53	84.94	92.47	0.48	130.96	7.99	0.94	114.30	44.21	0.72	94.74	85.33	0.53	0.3833333333333333	0.6283333333333334	-0.2450000000000001	6.584831705615107e-05	0.00037220405380373903	N
AT1G05910|AT1G05910|1|+	386.4	1796524	1:1796097-1796715	39.00	32.44	0.55	35.81	28.21	0.56	16.35	43.86	0.27	28.52	41.12	0.41	38.34	28.68	0.57	32.64	27.59	0.54	29.25	29.45	0.50	55.36	11.00	0.83	58.49	25.94	0.69	43.14	35.69	0.55	75.85	9.03	0.89	54.11	26.81	0.67	0.48333333333333334	0.6883333333333335	-0.20500000000000013	0.014311027286447623	0.041267753379405116	N
AT1G05940|AT1G05940|1|-	8359.0	1802023	1:1801110-1802260	90.62	64.38	0.58	77.06	82.59	0.48	77.47	68.57	0.53	69.61	90.76	0.43	89.05	96.64	0.48	68.72	98.62	0.41	100.68	58.16	0.63	130.48	8.24	0.94	111.12	57.89	0.66	89.81	40.75	0.69	83.07	39.30	0.68	96.45	14.21	0.87	0.48500000000000004	0.745	-0.25999999999999995	1.0307315730487368e-05	6.96760519822129e-05	N
AT1G05960|AT1G05960|1|-	573.1	1808435	1:1807960-1808636	103.84	80.51	0.56	121.09	63.67	0.66	108.74	64.71	0.63	99.66	113.67	0.47	80.12	109.49	0.42	91.48	118.13	0.44	82.43	21.15	0.80	60.04	84.06	0.42	50.97	113.86	0.31	62.82	61.76	0.50	81.43	14.98	0.84	59.64	45.22	0.57	0.53	0.5733333333333334	-0.043333333333333335	0.81663328708654	0.9548046798186786	N
AT1G06010|AT1G06010|1|+	990.6	1823860	1:1823498-1824236	5.81	73.17	0.07	10.59	95.08	0.10	8.51	82.21	0.09	6.54	71.09	0.08	5.27	74.67	0.07	7.73	75.72	0.09	13.20	105.54	0.11	14.23	149.69	0.09	13.54	120.74	0.10	12.51	147.71	0.08	17.52	164.17	0.10	26.12	131.38	0.17	0.08333333333333333	0.10833333333333335	-0.025000000000000022	0.6521875125926566	0.8231256426581303	N
AT1G06040|AT1G06040|1|-	1742587.5	1828611	1:1828340-1829307	840.65	1837.33	0.31	886.07	1783.92	0.33	803.32	1963.22	0.29	752.05	1640.84	0.31	746.91	1749.67	0.30	694.06	1585.86	0.30	987.66	1823.91	0.35	1559.01	1970.22	0.44	1429.07	1986.44	0.42	1409.30	1691.45	0.45	1599.56	2164.73	0.42	1612.74	1718.04	0.48	0.3066666666666667	0.4266666666666667	-0.12	1.036550714238669e-21	4.1366282921243587e-20	N
AT1G06060|AT1G06060|1|+	6433.3	1834673	1:1834275-1834829	96.04	20.59	0.82	130.35	0.00	1.00	134.73	13.87	0.91	103.19	0.00	1.00	96.23	27.51	0.78	84.85	34.70	0.71	158.26	26.29	0.86	95.42	45.14	0.68	169.89	0.00	1.00	150.89	3.13	0.98	138.07	13.62	0.91	221.30	0.00	1.00	0.87	0.9049999999999999	-0.03499999999999992	0.2414724871786517	0.4094031914509916	N
AT1G06070|AT1G06070|1|-	575.0	1835406	1:1834861-1835607	79.46	3.50	0.96	93.40	0.00	1.00	86.91	8.03	0.92	93.30	0.00	1.00	79.86	1.98	0.98	98.29	1.03	0.99	101.59	0.00	1.00	97.09	0.00	1.00	69.80	0.00	1.00	96.68	0.00	1.00	75.75	0.00	1.00	102.26	0.00	1.00	0.975	1.0	-0.025000000000000022	0.49720670391054683	0.6841239292106209	N
AT1G06080|AT1G06080|1|+	11960.8	1846096	1:1845895-1846311	184.58	188.75	0.49	244.34	241.70	0.50	219.18	278.81	0.44	170.11	179.96	0.49	197.28	209.68	0.48	143.20	278.62	0.34	239.32	147.88	0.62	215.16	202.57	0.52	224.49	118.63	0.65	352.48	37.47	0.90	315.47	163.20	0.66	358.99	238.07	0.60	0.4566666666666666	0.6583333333333333	-0.20166666666666672	1.0304725268570969e-08	1.1920611757135008e-07	N
AT1G06130|AT1G06130|1|-	1906.8	1857985	1:1857757-1858186	94.15	143.59	0.40	81.46	124.12	0.40	78.99	91.28	0.46	68.42	157.76	0.30	100.57	107.66	0.48	84.74	150.49	0.36	91.81	108.97	0.46	150.36	79.13	0.66	122.11	114.33	0.52	124.71	78.38	0.61	178.04	104.73	0.63	134.53	66.34	0.67	0.39999999999999997	0.5916666666666667	-0.1916666666666667	3.7239143806617277e-05	0.0002221160696316662	N
AT1G06150|AT1G06150|1|-	460.3	1869085	1:1868989-1869311	55.40	27.89	0.67	60.63	31.55	0.66	59.34	34.58	0.63	33.82	57.85	0.37	53.71	36.96	0.59	73.85	13.50	0.85	92.37	9.92	0.90	141.70	0.00	1.00	123.53	20.60	0.86	141.30	6.00	0.96	131.79	0.00	1.00	128.08	17.97	0.88	0.6283333333333333	0.9333333333333332	-0.30499999999999994	1.6797747271825252e-08	1.8733918590362236e-07	N
AT1G06180|AT1G06180|1|+	657.4	1890973	1:1890612-1891276	52.33	24.48	0.68	95.79	55.66	0.63	59.79	59.38	0.50	53.13	40.72	0.57	62.05	57.80	0.52	38.35	44.50	0.46	63.45	24.42	0.72	87.77	23.16	0.79	40.22	56.91	0.41	68.34	34.18	0.67	75.65	32.07	0.70	61.29	56.71	0.52	0.5599999999999999	0.635	-0.07500000000000007	0.2613705984949555	0.43432100957263753	N
AT1G06190|AT1G06190|1|-	30310.5	1893993	1:1892231-1894194	287.45	0.00	1.00	285.42	0.00	1.00	232.51	0.00	1.00	293.83	0.00	1.00	256.81	0.00	1.00	251.69	0.00	1.00	264.14	0.00	1.00	243.14	0.00	1.00	282.68	0.00	1.00	237.95	0.00	1.00	262.07	0.00	1.00	227.04	0.00	1.00	1.0	1.0	0.0	1.0	1.0	N
AT1G06200|AT1G06200|1|-	5570.4	1894481	1:1894289-1894688	78.79	195.50	0.29	46.92	243.10	0.16	65.67	261.27	0.20	50.98	175.19	0.23	58.20	227.36	0.20	56.82	245.19	0.19	106.87	319.70	0.25	166.33	402.94	0.29	125.47	391.00	0.24	172.17	394.94	0.30	187.01	392.08	0.32	174.80	362.13	0.33	0.21166666666666664	0.2883333333333334	-0.07666666666666674	0.012025729622181498	0.035727586086285436	N
AT1G06210|AT1G06210|1|+	4094.8	1898422	1:1898141-1899237	95.43	6.11	0.94	97.48	36.31	0.73	81.52	40.64	0.67	105.51	17.00	0.86	89.90	2.45	0.97	130.11	0.00	1.00	86.25	20.89	0.80	124.20	0.00	1.00	112.24	0.00	1.00	102.77	10.49	0.91	143.05	0.00	1.00	119.83	11.20	0.91	0.8616666666666667	0.9366666666666666	-0.07499999999999996	0.030506561140554174	0.07808956673201618	N
AT1G06220|AT1G06220|1|+	2291.0	1904686	1:1904485-1904897	23.25	113.40	0.17	17.40	111.61	0.13	24.05	90.57	0.21	4.61	149.25	0.03	15.83	112.98	0.12	20.42	115.97	0.15	46.44	116.79	0.28	49.78	208.26	0.19	46.02	102.04	0.31	71.34	84.28	0.46	74.77	157.19	0.32	58.65	123.61	0.32	0.135	0.31333333333333335	-0.17833333333333334	0.0002637702454750169	0.0013033739081478087	N
AT1G06230|AT1G06230|1|+	3393.3	1910765	1:1910431-1911056	36.98	133.31	0.22	27.49	131.21	0.17	25.80	134.18	0.16	23.21	112.52	0.17	19.36	131.67	0.13	19.00	119.84	0.14	29.94	202.48	0.13	62.32	260.12	0.19	84.39	216.04	0.28	53.66	260.99	0.17	54.18	230.44	0.19	63.98	272.97	0.19	0.165	0.19166666666666668	-0.026666666666666672	0.520696413058249	0.7049264654713652	N
AT1G06240|AT1G06240|1|+	145.5	1913056	1:1912804-1913175	46.87	27.34	0.63	49.12	9.59	0.84	65.12	0.00	1.00	34.86	32.89	0.51	26.16	21.42	0.55	62.90	11.84	0.84	53.58	20.48	0.72	49.78	37.81	0.57	23.02	34.17	0.40	51.40	6.26	0.89	72.63	41.37	0.64	57.24	17.54	0.77	0.7283333333333332	0.665	0.06333333333333313	0.36633504776676695	0.5564462503299241	N
AT1G06290|AT1G06290|1|+	1337.0	1926034	1:1925760-1926278	59.49	105.26	0.36	55.32	125.39	0.31	64.74	100.02	0.39	58.26	136.23	0.30	44.21	133.28	0.25	56.22	169.93	0.25	89.14	130.41	0.41	93.51	91.68	0.50	71.34	114.14	0.38	41.14	120.55	0.25	62.20	139.27	0.31	63.15	137.12	0.32	0.31	0.36166666666666664	-0.05166666666666664	0.23057303849070904	0.3941609154220025	N
AT1G06360|AT1G06360|1|-	8281.5	1939170	1:1938862-1939371	105.46	349.88	0.23	105.61	426.46	0.20	98.64	366.36	0.21	105.18	338.76	0.24	85.21	262.77	0.24	123.05	257.10	0.32	201.34	430.45	0.32	169.44	395.46	0.30	147.69	442.95	0.25	193.38	464.78	0.29	218.96	293.75	0.43	242.15	586.00	0.29	0.24000000000000002	0.3133333333333333	-0.07333333333333328	0.010158838957530475	0.031089739057893542	N
AT1G06370|AT1G06370|1|-	89.7	1942913	1:1942614-1943114	10.44	23.99	0.30	4.31	26.35	0.14	10.86	40.65	0.21	7.12	30.34	0.19	NA	NA	NA	6.56	31.92	0.17	15.39	43.56	0.26	10.13	27.77	0.27	9.10	21.04	0.30	10.32	32.14	0.24	27.63	36.86	0.43	13.58	34.84	0.28	0.202	0.2966666666666667	-0.09466666666666668	0.3112365878443404	0.4938930011832019	N
AT1G06400|AT1G06400|1|-	8311.0	1951081	1:1950860-1951518	151.98	149.33	0.50	199.48	161.11	0.55	130.04	188.54	0.41	107.26	221.34	0.33	93.13	214.52	0.30	93.35	177.81	0.34	217.65	313.60	0.41	405.48	262.73	0.61	319.65	354.72	0.47	369.19	401.49	0.48	361.89	302.01	0.55	457.36	379.23	0.55	0.40499999999999997	0.5116666666666667	-0.10666666666666674	0.002698959109352551	0.01000356459143465	N
AT1G06410|AT1G06410|1|+	37113.4	1958176	1:1957842-1958866	193.06	305.55	0.39	188.07	294.41	0.39	160.21	296.68	0.35	172.73	343.13	0.33	149.59	278.11	0.35	189.59	347.79	0.35	285.50	464.58	0.38	389.77	326.39	0.54	357.63	434.13	0.45	447.80	444.38	0.50	355.05	405.34	0.47	433.42	514.26	0.46	0.36000000000000004	0.4666666666666666	-0.10666666666666658	0.00020057623122351998	0.0010163824628598257	N
AT1G06430|AT1G06430|1|-	28670.8	1960223	1:1960031-1960564	595.13	398.89	0.60	609.53	311.20	0.66	384.16	292.91	0.57	619.57	461.59	0.57	522.32	481.48	0.52	527.93	460.08	0.53	566.17	380.90	0.60	983.16	214.12	0.82	694.76	558.17	0.55	629.35	426.77	0.60	864.63	178.86	0.83	795.88	302.39	0.72	0.5750000000000001	0.6866666666666666	-0.11166666666666658	1.8037259453033618e-07	1.7086391533345573e-06	N
AT1G06470|AT1G06470|1|+	313.1	1973624	1:1973423-1973834	27.24	37.31	0.42	23.18	38.39	0.38	22.87	49.03	0.32	9.72	74.60	0.12	20.33	84.84	0.19	16.67	64.38	0.21	20.62	69.18	0.23	49.97	60.59	0.45	56.32	64.26	0.47	46.86	28.63	0.62	59.47	71.62	0.45	42.81	64.50	0.40	0.2733333333333334	0.4366666666666667	-0.16333333333333333	0.012979136718940177	0.0380902780791815	N
AT1G06473|AT1G06473|1|-	528.2	11472150	1:11471861-11472650	14.63	55.89	0.21	17.11	62.25	0.22	14.82	72.65	0.17	12.93	23.55	0.35	36.58	34.12	0.52	16.57	53.57	0.24	14.50	54.17	0.21	11.39	64.60	0.15	16.72	72.16	0.19	9.46	62.09	0.13	10.07	74.49	0.12	8.45	74.49	0.10	0.285	0.15	0.13499999999999998	0.09512676779991439	0.19701431672108155	N
AT1G06500|AT1G06500|1|+	899.1	1990359	1:1990158-1990634	97.08	21.02	0.82	106.99	0.02	1.00	95.50	37.19	0.72	72.44	56.30	0.56	114.72	8.30	0.93	103.74	6.67	0.94	106.51	36.77	0.74	175.33	36.10	0.83	142.70	0.00	1.00	174.08	0.00	1.00	127.18	54.40	0.70	181.51	0.00	1.00	0.8283333333333335	0.8783333333333333	-0.04999999999999982	0.23518918052051516	0.4007345672948055	N
AT1G06510|AT1G06510|1|+	2832.3	1993745	1:1993544-1993841	20.70	77.71	0.21	13.37	66.51	0.17	14.48	62.41	0.19	13.68	59.92	0.19	14.00	46.48	0.23	15.67	49.84	0.24	21.61	71.72	0.23	27.98	110.66	0.20	25.83	88.80	0.23	36.05	110.56	0.25	31.75	127.47	0.20	27.98	88.12	0.24	0.205	0.225	-0.020000000000000018	0.8590779113164446	0.9813469740649714	N
AT1G06630|AT1G06630|1|+	758.4	2031292	1:2031091-2031388	77.95	0.00	1.00	76.74	0.00	1.00	72.90	0.00	1.00	67.10	0.00	1.00	58.24	0.00	1.00	100.91	0.00	1.00	36.13	10.39	0.78	26.06	26.04	0.50	23.25	27.83	0.46	56.49	36.93	0.60	34.75	21.58	0.62	52.54	26.81	0.66	1.0	0.6033333333333334	0.3966666666666666	2.6780885182192033e-10	3.930895953551584e-09	N
AT1G06640|AT1G06640|1|+	62349.5	2033801	1:2033070-2034112	199.94	296.70	0.40	176.22	310.56	0.36	209.69	345.55	0.38	158.74	335.28	0.32	205.52	313.07	0.40	264.42	281.79	0.48	237.77	189.41	0.56	324.81	116.33	0.74	217.67	262.84	0.45	362.30	177.60	0.67	286.95	134.65	0.68	462.14	109.62	0.81	0.39000000000000007	0.6516666666666667	-0.26166666666666666	6.465125099246731e-17	1.840800805478933e-15	N
AT1G06645|AT1G06645|1|+	440.9	2035498	1:2035245-2035718	39.97	85.05	0.32	52.68	99.96	0.35	48.99	55.97	0.47	45.70	55.09	0.45	45.27	62.58	0.42	40.04	67.14	0.37	76.57	36.11	0.68	96.68	91.90	0.51	62.61	121.09	0.34	40.20	86.68	0.32	115.93	15.90	0.88	61.90	114.19	0.35	0.39666666666666667	0.5133333333333333	-0.11666666666666664	0.1072028439280417	0.21625551362422865	N
AT1G06650|AT1G06650|1|+	7935.0	2037172	1:2036932-2037311	229.01	135.05	0.63	266.63	125.37	0.68	215.32	157.63	0.58	218.24	177.90	0.55	152.37	210.91	0.42	230.34	158.22	0.59	420.16	141.93	0.75	410.32	180.34	0.69	407.78	284.63	0.59	450.52	155.35	0.74	517.77	236.48	0.69	502.44	176.91	0.74	0.5750000000000001	0.6999999999999998	-0.12499999999999978	0.00010266615312680756	0.0005590726313560934	N
AT1G06670|AT1G06670|1|+	1064.3	2046074	1:2045873-2047655	125.15	0.00	1.00	121.26	0.00	1.00	120.16	0.00	1.00	134.46	0.00	1.00	112.29	0.00	1.00	119.79	0.00	1.00	119.83	0.00	1.00	95.62	0.00	1.00	110.90	0.00	1.00	92.29	0.00	1.00	91.86	0.00	1.00	98.83	0.00	1.00	1.0	1.0	0.0	1.0	1.0	N
AT1G06680|AT1G06680|1|+	19984243.8	2049212	1:2048926-2049400	10760.23	19811.27	0.35	11060.14	20609.07	0.35	9473.93	18832.56	0.33	9589.62	21179.51	0.31	10239.86	20747.63	0.33	8869.15	21564.80	0.29	12395.75	19473.49	0.39	18448.09	19880.01	0.48	15899.82	18324.83	0.46	15300.94	17897.28	0.46	18579.33	19010.11	0.49	18939.12	18231.56	0.51	0.3266666666666667	0.465	-0.1383333333333333	8.25753372744067e-296	1.1722158949939706e-292	N
AT1G06690|AT1G06690|1|-	10094.3	2049726	1:2049439-2049927	35.38	250.08	0.12	53.84	282.02	0.16	36.43	211.11	0.15	32.70	319.94	0.09	41.73	269.80	0.13	41.00	304.15	0.12	61.17	449.54	0.12	99.77	517.12	0.16	100.76	668.55	0.13	92.16	530.38	0.15	106.58	475.89	0.18	120.00	584.29	0.17	0.12833333333333333	0.15166666666666667	-0.023333333333333345	0.37545374806434734	0.5658856202814226	N
AT1G06700|AT1G06700|1|-	9945.3	2052575	1:2052370-2052875	54.04	251.09	0.18	56.80	209.28	0.21	56.43	254.67	0.18	36.85	203.43	0.15	59.19	164.73	0.26	70.15	238.24	0.23	56.57	309.93	0.15	111.81	333.67	0.25	109.57	281.09	0.28	135.09	319.22	0.30	152.58	301.05	0.34	119.28	354.77	0.25	0.2016666666666667	0.26166666666666666	-0.05999999999999997	0.05734862295334213	0.13209554779197616	N
AT1G06720|AT1G06720|1|-	354.6	2060575	1:2060444-2060776	46.90	37.87	0.55	25.98	33.98	0.43	39.26	25.42	0.61	15.43	38.40	0.29	21.86	20.84	0.51	19.20	24.97	0.43	33.73	32.66	0.51	39.62	79.37	0.33	46.02	32.32	0.59	38.72	37.45	0.51	60.47	65.30	0.48	42.44	75.91	0.36	0.47	0.4633333333333333	0.006666666666666654	0.7395652026604642	0.893745783998638	N
AT1G06730|AT1G06730|1|+	410.7	2070138	1:2069654-2070455	15.37	38.57	0.29	27.70	21.36	0.56	19.05	46.97	0.29	31.38	32.81	0.49	14.33	54.72	0.21	34.29	22.73	0.60	55.09	15.44	0.78	87.90	0.00	1.00	23.66	53.96	0.30	20.75	24.53	0.46	35.90	35.69	0.50	39.55	38.06	0.51	0.4066666666666667	0.5916666666666667	-0.185	0.01358672334137791	0.039534778870650746	N
AT1G06760|AT1G06760|1|-	9451.2	2077109	1:2076998-2077310	1241.27	122.33	0.91	1313.51	0.00	1.00	1050.76	138.04	0.88	1139.86	141.02	0.89	1113.05	275.30	0.80	1436.01	277.70	0.84	1115.42	43.07	0.96	1267.59	0.00	1.00	1438.75	0.00	1.00	1165.93	164.52	0.88	1401.55	0.00	1.00	999.94	160.81	0.86	0.8866666666666667	0.9500000000000001	-0.06333333333333335	8.428638294979271e-11	1.3107258018342569e-09	N
AT1G06780|AT1G06780|1|+	179.0	2086848	1:2086578-2087141	15.91	40.87	0.28	12.61	52.00	0.20	14.54	51.15	0.22	15.74	57.63	0.21	18.05	38.28	0.32	21.16	34.60	0.38	18.53	46.10	0.29	16.74	49.74	0.25	11.77	26.45	0.31	17.42	36.17	0.33	23.63	44.89	0.34	13.91	52.91	0.21	0.2683333333333333	0.2883333333333334	-0.020000000000000073	1.0	1.0	N
AT1G06820|AT1G06820|1|-	8793.6	2093079	1:2092946-2093420	96.39	45.48	0.68	68.59	83.92	0.45	59.18	74.42	0.44	64.33	52.31	0.55	85.72	54.70	0.61	95.12	50.17	0.65	107.94	37.68	0.74	196.36	0.00	1.00	114.29	6.82	0.94	114.26	0.00	1.00	145.16	39.42	0.79	141.77	59.59	0.70	0.5633333333333334	0.8616666666666667	-0.29833333333333334	3.1850335888617965e-08	3.4290009504355005e-07	N
AT1G06840|AT1G06840|1|-	287.9	2097873	1:2097747-2098195	62.00	24.82	0.71	42.75	34.64	0.55	95.32	2.82	0.97	42.61	29.15	0.59	64.73	5.41	0.92	37.71	40.12	0.48	114.45	0.00	1.00	77.00	44.53	0.63	47.05	39.17	0.55	77.49	24.74	0.76	80.72	38.19	0.68	92.02	6.56	0.93	0.7033333333333333	0.7583333333333333	-0.05500000000000005	0.6088587619688756	0.7851323018018059	N
AT1G06850|AT1G06850|1|+	92.9	2106481	1:2106184-2106749	11.61	22.84	0.34	9.48	21.49	0.31	22.07	43.75	0.34	14.27	29.89	0.32	15.74	22.45	0.41	13.25	22.08	0.38	27.26	43.37	0.39	36.59	13.85	0.73	37.33	32.31	0.54	22.98	29.02	0.44	14.08	44.31	0.24	36.29	9.94	0.79	0.35000000000000003	0.5216666666666666	-0.17166666666666658	0.14824034199108915	0.27957188809365213	N
AT1G06870|AT1G06870|1|+	585.2	2110751	1:2110519-2110986	58.24	41.75	0.58	59.07	52.50	0.53	51.42	62.73	0.45	60.41	61.75	0.49	31.58	74.57	0.30	52.02	73.15	0.42	75.28	50.80	0.60	84.01	85.11	0.50	85.88	68.64	0.56	43.65	70.66	0.38	73.44	118.07	0.38	117.20	33.72	0.78	0.4616666666666666	0.5333333333333333	-0.07166666666666671	0.3196966063413248	0.5037781758981517	N
AT1G06890|AT1G06890|1|-	2446.1	2111658	1:2111323-2111859	32.60	122.25	0.21	23.02	79.70	0.22	21.76	134.88	0.14	8.29	105.64	0.07	18.86	99.03	0.16	32.92	123.43	0.21	21.92	94.53	0.19	32.27	99.56	0.24	29.11	74.79	0.28	44.09	121.87	0.27	41.27	126.52	0.25	50.54	107.70	0.32	0.16833333333333336	0.25833333333333336	-0.09	0.07656838935156267	0.16670904579020118	N
AT1G06900|AT1G06900|1|-	740.1	2115070	1:2114765-2115398	16.38	78.72	0.17	15.58	79.39	0.16	15.61	90.25	0.15	10.23	70.73	0.13	13.75	94.17	0.13	11.18	90.01	0.11	18.42	105.68	0.15	46.28	149.00	0.24	22.34	112.48	0.17	41.18	102.73	0.29	42.22	95.95	0.31	30.07	111.94	0.21	0.14166666666666666	0.22833333333333336	-0.0866666666666667	0.09390468281530107	0.19507626951422885	N
AT1G06950|AT1G06950|1|-	5078.4	2130254	1:2130053-2130551	125.21	304.48	0.29	93.88	282.10	0.25	70.79	261.78	0.21	77.31	316.75	0.20	88.83	246.40	0.26	53.25	321.53	0.14	155.24	401.97	0.28	300.54	354.22	0.46	305.61	296.86	0.51	126.93	415.68	0.23	318.68	367.10	0.46	324.73	353.52	0.48	0.225	0.4033333333333333	-0.17833333333333332	1.5223270584875654e-09	2.0089460797066318e-08	N
AT1G06960|AT1G06960|1|+	2696.1	2137146	1:2136871-2137838	76.65	0.00	1.00	73.97	0.00	1.00	81.32	0.00	1.00	62.22	0.00	1.00	59.17	16.40	0.78	85.22	0.00	1.00	95.37	0.00	1.00	132.44	0.00	1.00	131.09	0.00	1.00	137.87	0.00	1.00	151.53	0.00	1.00	141.55	0.00	1.00	0.9633333333333334	1.0	-0.036666666666666625	0.1314231588917939	0.2542246310896936	N
AT1G06977|AT1G06977|1|+	2157.0	13702172	1:13701971-13702749	NA	NA	NA	NA	NA	NA	NA	NA	NA	1.81	33.88	0.05	NA	NA	NA	6.63	31.26	0.17	8.24	30.77	0.21	8.95	31.76	0.22	10.85	42.42	0.20	NA	NA	NA	7.34	38.26	0.16	NA	NA	NA	0.11000000000000001	0.1975	-0.0875	0.530891949366769	0.7144465467033563	N
AT1G07010|AT1G07010|1|+	1799.6	2155091	1:2154882-2155213	196.15	270.95	0.42	197.22	235.88	0.46	161.64	179.12	0.47	166.49	232.60	0.42	150.64	234.58	0.39	199.12	176.13	0.53	206.65	166.96	0.55	329.36	120.64	0.73	204.87	145.59	0.58	216.30	43.78	0.83	297.24	112.24	0.73	210.59	131.57	0.62	0.4483333333333334	0.6733333333333333	-0.22499999999999992	5.053104659747757e-10	7.139376781382056e-09	N
AT1G07030|AT1G07030|1|-	675.6	2158636	1:2158413-2158837	129.65	64.84	0.67	92.90	76.72	0.55	70.06	80.26	0.47	105.93	81.68	0.56	99.03	62.58	0.61	74.41	74.89	0.50	77.91	38.58	0.67	170.61	2.23	0.99	120.88	24.37	0.83	135.17	7.41	0.95	125.99	0.87	0.99	193.60	0.00	1.00	0.5599999999999999	0.9050000000000001	-0.3450000000000002	2.335618943226108e-13	4.875849882108788e-12	N
AT1G07040|AT1G07040|1|-	4357.8	2161122	1:2160919-2161323	10.55	119.03	0.08	3.97	130.74	0.03	5.38	136.71	0.04	9.19	132.91	0.06	11.19	122.08	0.08	9.11	118.12	0.07	12.67	170.53	0.07	34.82	283.78	0.11	27.98	270.06	0.09	49.77	299.49	0.14	26.61	262.02	0.09	30.16	299.99	0.09	0.06	0.09833333333333333	-0.03833333333333333	0.1994141655711471	0.35177533052726917	N
AT1G07070|AT1G07070|1|+	1724.7	2169863	1:2169662-2169957	7.06	36.21	0.16	0.00	46.54	0.00	11.23	52.42	0.18	18.84	29.08	0.39	8.93	54.74	0.14	15.52	15.85	0.49	1.10	64.93	0.02	0.00	77.19	0.00	0.00	67.15	0.00	0.00	33.30	0.00	2.79	62.25	0.04	6.66	116.30	0.05	0.22666666666666666	0.018333333333333333	0.20833333333333331	0.0005277943735349876	0.0023973558672156525	N
AT1G07080|AT1G07080|1|+	15475.4	2171896	1:2171646-2172194	137.94	438.30	0.24	92.07	523.96	0.15	109.04	493.67	0.18	102.48	430.49	0.19	130.90	431.91	0.23	113.18	465.34	0.20	232.35	433.49	0.35	267.86	434.56	0.38	173.67	698.10	0.20	231.00	528.51	0.30	260.45	587.13	0.31	250.18	472.13	0.35	0.19833333333333333	0.315	-0.11666666666666667	4.2064742337877765e-06	3.0916963358838116e-05	N
AT1G07090|AT1G07090|1|-	1655.6	2174279	1:2173952-2174894	70.18	96.78	0.42	62.52	99.57	0.39	75.58	103.29	0.42	55.52	72.83	0.43	59.08	75.24	0.44	63.97	107.55	0.37	66.18	78.08	0.46	53.77	46.42	0.54	64.41	55.32	0.54	83.19	59.01	0.59	88.75	0.00	1.00	123.08	37.34	0.77	0.4116666666666667	0.65	-0.23833333333333334	0.00030120784132289346	0.0014679265910866072	N
AT1G07110|AT1G07110|1|-	11456.6	2178205	1:2178022-2178440	44.75	330.94	0.12	35.50	327.92	0.10	31.25	347.60	0.08	37.10	296.65	0.11	34.70	285.36	0.11	40.18	295.31	0.12	76.54	525.05	0.13	131.69	607.03	0.18	91.73	482.65	0.16	104.61	576.95	0.15	151.66	577.32	0.21	64.90	562.81	0.10	0.10666666666666667	0.155	-0.048333333333333325	0.02777382455232534	0.07217272347710693	N
AT1G07140|AT1G07140|1|-	29903.1	2192233	1:2191679-2192613	200.32	463.51	0.30	188.86	431.40	0.30	199.70	519.95	0.28	178.40	502.00	0.26	162.60	518.17	0.24	155.02	538.10	0.22	225.17	682.22	0.25	316.30	859.62	0.27	253.64	746.86	0.25	249.39	766.13	0.25	325.68	796.58	0.29	354.88	876.74	0.29	0.26666666666666666	0.26666666666666666	0.0	1.0	1.0	N
AT1G07180|AT1G07180|1|+	15416.0	2206827	1:2206621-2207099	45.68	517.51	0.08	36.05	496.24	0.07	24.10	441.37	0.05	34.02	507.96	0.06	28.83	409.85	0.07	24.21	453.39	0.05	46.41	658.82	0.07	82.31	993.67	0.08	58.56	874.55	0.06	60.82	632.01	0.09	80.98	722.92	0.10	69.32	671.30	0.09	0.06333333333333334	0.08166666666666667	-0.018333333333333326	0.2811479249333583	0.45773745292870316	N
AT1G07200|AT1G07200|1|-	708.8	2209054	1:2208477-2210528	54.46	13.51	0.80	37.43	20.42	0.65	53.15	32.72	0.62	28.42	27.37	0.51	50.26	16.59	0.75	47.34	23.05	0.67	58.09	22.56	0.72	67.46	7.77	0.90	60.13	24.82	0.71	54.55	13.14	0.81	59.55	22.09	0.73	79.69	0.00	1.00	0.6666666666666666	0.8116666666666666	-0.14500000000000002	0.08495752234234474	0.18112484435011364	N
AT1G07210|AT1G07210|1|+	6421.5	2216678	1:2216477-2216925	168.71	0.00	1.00	254.71	0.00	1.00	192.01	0.00	1.00	159.05	0.00	1.00	102.27	16.60	0.86	122.71	0.00	1.00	248.25	0.00	1.00	269.86	0.00	1.00	217.79	0.00	1.00	350.53	0.00	1.00	319.70	0.00	1.00	258.37	0.00	1.00	0.9766666666666667	1.0	-0.023333333333333317	0.14199817795317402	0.2701064116234093	N
AT1G07220|AT1G07220|1|-	167.5	2217212	1:2216982-2217420	47.31	15.75	0.75	22.05	27.09	0.45	30.69	3.89	0.89	53.49	36.92	0.59	29.88	10.31	0.74	19.81	48.26	0.29	19.65	15.89	0.55	39.00	7.56	0.84	25.90	23.75	0.52	39.46	0.00	1.00	69.43	2.28	0.97	52.47	0.00	1.00	0.6183333333333333	0.8133333333333334	-0.19500000000000006	0.009464191619847608	0.02927036169512159	N
AT1G07230|AT1G07230|1|-	2055.5	2220516	1:2220181-2220834	63.82	181.66	0.26	64.52	202.95	0.24	58.29	193.23	0.23	76.20	181.57	0.30	64.53	194.83	0.25	62.68	149.25	0.30	59.52	186.07	0.24	91.46	162.72	0.36	66.95	206.29	0.25	53.46	184.73	0.22	77.04	150.23	0.34	55.19	215.03	0.20	0.26333333333333336	0.26833333333333337	-0.0050000000000000044	0.919449634513832	1.0	N
AT1G07310|AT1G07310|1|-	7784.4	2247630	1:2247112-2248961	92.05	128.08	0.42	94.17	129.98	0.42	72.62	170.77	0.30	84.86	153.25	0.36	62.70	151.95	0.29	76.36	136.81	0.36	100.22	135.40	0.43	117.93	96.23	0.55	114.10	130.62	0.47	129.55	110.39	0.54	133.45	94.29	0.59	154.29	77.07	0.67	0.35833333333333334	0.5416666666666666	-0.1833333333333333	0.00011143800779911923	0.0006018258062499174	N
AT1G07323|AT1G07323|1|-	480.2	17295781	1:17295588-17296007	103.95	29.32	0.78	90.68	96.30	0.48	76.80	71.64	0.52	95.00	71.56	0.57	86.73	72.26	0.55	126.15	46.82	0.73	68.21	38.93	0.64	52.11	59.16	0.47	56.25	43.28	0.57	62.00	41.61	0.60	58.39	23.93	0.71	62.89	40.61	0.61	0.6050000000000001	0.6	0.0050000000000001155	0.8971433954614633	1.0	N
AT1G07350|AT1G07350|1|-	3137.1	2257674	1:2257384-2257906	87.48	345.07	0.20	94.28	233.46	0.29	67.34	283.79	0.19	73.96	282.67	0.21	86.68	315.88	0.22	54.97	305.60	0.15	51.87	202.20	0.20	75.02	148.19	0.34	48.81	138.15	0.26	98.82	194.28	0.34	121.00	159.35	0.43	70.51	196.33	0.26	0.20999999999999996	0.305	-0.09500000000000003	0.005895530106417791	0.01953447237995118	N
AT1G07360|AT1G07360|1|-	1199.8	2261201	1:2260317-2261408	166.54	21.15	0.89	130.68	95.76	0.58	154.30	15.88	0.91	150.73	23.73	0.86	155.05	23.93	0.87	140.13	34.83	0.80	168.57	0.00	1.00	141.08	0.00	1.00	145.11	11.66	0.93	128.83	0.00	1.00	156.84	0.00	1.00	148.13	0.00	1.00	0.8183333333333332	0.9883333333333333	-0.17000000000000004	4.149317008651345e-09	5.141117595382596e-08	N
AT1G07370|AT1G07370|1|+	122.7	2264376	1:2264161-2264553	8.05	40.51	0.17	8.31	36.23	0.19	8.45	33.18	0.20	1.71	38.08	0.04	3.58	50.60	0.07	NA	NA	NA	7.40	62.89	0.11	NA	NA	NA	10.70	35.71	0.23	2.63	47.81	0.05	4.19	35.34	0.11	7.73	32.97	0.19	0.13400000000000004	0.13799999999999998	-0.003999999999999948	1.0	1.0	N
AT1G07380|AT1G07380|1|-	189.3	2264872	1:2264634-2265088	46.89	25.65	0.65	62.95	12.06	0.84	39.82	37.11	0.52	42.61	3.65	0.92	45.93	45.31	0.50	68.53	2.15	0.97	46.95	15.95	0.75	107.33	0.00	1.00	47.40	32.84	0.59	44.03	50.84	0.46	59.80	88.80	0.40	55.40	24.94	0.69	0.7333333333333333	0.6483333333333333	0.08499999999999996	0.2495173942429646	0.4193934957023578	N
AT1G07420|AT1G07420|1|+	764.3	2280204	1:2279961-2280502	11.42	51.38	0.18	10.71	56.40	0.16	10.22	62.97	0.14	11.12	47.71	0.19	16.31	58.98	0.22	7.22	48.74	0.13	23.49	85.05	0.22	19.88	111.79	0.15	22.04	105.33	0.17	18.71	141.32	0.12	21.47	129.75	0.14	19.78	123.06	0.14	0.17	0.15666666666666668	0.013333333333333336	0.6809781482720254	0.8471306784400496	N
AT1G07440|AT1G07440|1|-	4340.5	2286413	1:2286185-2286624	74.93	217.31	0.26	62.48	262.82	0.19	66.88	214.56	0.24	90.08	214.35	0.30	70.70	220.05	0.24	100.56	178.64	0.36	100.58	198.69	0.34	164.92	295.63	0.36	104.66	330.67	0.24	141.74	252.08	0.36	150.25	228.68	0.40	180.40	294.69	0.38	0.26499999999999996	0.3466666666666666	-0.08166666666666667	0.020519255620534374	0.05603183377335809	N
AT1G07510|AT1G07510|1|+	1853.7	2309105	1:2308904-2309534	140.08	1.15	0.99	174.80	0.00	1.00	139.34	0.00	1.00	145.34	0.00	1.00	165.30	0.00	1.00	132.61	0.00	1.00	152.40	7.70	0.95	211.36	0.00	1.00	190.03	0.00	1.00	213.31	0.00	1.00	216.09	0.00	1.00	241.68	0.00	1.00	0.9983333333333334	0.9916666666666667	0.00666666666666671	1.0	1.0	N
AT1G07530|AT1G07530|1|-	2533.2	2316006	1:2313581-2316207	150.49	0.00	1.00	155.31	0.00	1.00	190.84	0.00	1.00	148.24	0.00	1.00	149.49	0.00	1.00	148.06	2.61	0.98	143.37	0.00	1.00	110.90	0.00	1.00	128.24	0.00	1.00	116.92	0.00	1.00	101.13	0.00	1.00	117.05	0.00	1.00	0.9966666666666667	1.0	-0.0033333333333332993	1.0	1.0	N
AT1G07570|AT1G07570|1|-	550.0	2331382	1:2331148-2331838	70.76	39.87	0.64	75.89	67.98	0.53	63.80	79.64	0.44	47.18	105.17	0.31	41.55	70.51	0.37	31.30	85.25	0.27	87.44	48.73	0.64	103.32	51.40	0.67	122.05	19.21	0.86	91.45	56.19	0.62	52.72	90.98	0.37	69.57	77.17	0.47	0.4266666666666667	0.605	-0.1783333333333333	0.003675465988044621	0.01303465578986417	N
AT1G07603|AT1G07603|1|-	74820.2	18518230	1:18517832-18518431	0.09	724.19	0.00	3.25	661.84	0.00	0.00	914.17	0.00	0.00	633.28	0.00	0.00	663.37	0.00	0.00	705.73	0.00	0.69	619.13	0.00	0.00	441.89	0.00	0.00	441.23	0.00	0.00	402.11	0.00	0.11	482.48	0.00	0.00	510.04	0.00	0.0	0.0	0.0	1.0	1.0	N
AT1G07610|AT1G07610|1|+	874580.4	2341985	1:2341784-2342148	846.88	2344.72	0.27	774.89	2383.33	0.25	847.74	2471.03	0.26	865.36	2653.97	0.25	967.90	2571.99	0.27	1250.90	3575.18	0.26	617.88	1717.00	0.26	894.62	1959.87	0.31	630.15	844.65	0.43	478.62	1029.47	0.32	771.86	1645.05	0.32	576.93	1151.76	0.33	0.26	0.32833333333333337	-0.06833333333333336	2.680870779272902e-07	2.4712256895765144e-06	N
AT1G07630|AT1G07630|1|+	172.5	2351546	1:2351322-2351799	4.01	42.66	0.09	3.66	48.90	0.07	1.25	34.65	0.03	1.00	29.21	0.03	2.19	41.79	0.05	8.95	65.01	0.12	10.51	37.35	0.22	7.19	63.13	0.10	5.10	34.37	0.13	12.63	39.20	0.24	19.06	37.11	0.34	13.41	53.55	0.20	0.065	0.205	-0.13999999999999999	0.08081115071593031	0.17392687993593234	N
AT1G07650|AT1G07650|1|-	826.8	2359781	1:2359111-2360176	1.72	104.54	0.02	3.96	108.80	0.04	4.31	112.07	0.04	1.79	122.56	0.01	1.39	110.92	0.01	2.65	109.61	0.02	13.56	133.63	0.09	2.44	111.58	0.02	5.70	124.57	0.04	5.17	155.88	0.03	13.68	103.02	0.12	19.76	190.49	0.09	0.02333333333333333	0.065	-0.04166666666666667	0.07312550817041305	0.16072731136682025	N
AT1G07660|AT1G07660|1|+	3197.1	2369560	1:2369189-2369735	234.32	0.00	1.00	168.99	107.53	0.61	194.37	54.11	0.78	140.62	36.67	0.79	167.46	117.34	0.59	179.91	99.19	0.64	145.48	86.01	0.63	223.05	65.30	0.77	181.16	26.58	0.87	183.59	144.67	0.56	167.74	119.35	0.58	244.67	85.43	0.74	0.7349999999999999	0.6916666666666668	0.04333333333333311	0.38984056583723836	0.5806994007981768	N
AT1G07670|AT1G07670|1|-	1172.4	2370289	1:2370020-2370889	52.12	72.03	0.42	68.05	66.49	0.51	42.33	93.76	0.31	41.44	126.02	0.25	37.25	80.11	0.32	31.91	96.10	0.25	82.13	46.59	0.64	78.15	47.63	0.62	59.30	65.29	0.48	86.98	47.33	0.65	95.54	41.38	0.70	72.15	44.83	0.62	0.3433333333333333	0.6183333333333333	-0.27499999999999997	4.1904577934933014e-06	3.084487340292069e-05	N
AT1G07700|AT1G07700|1|+	6334.4	2381215	1:2381014-2381390	23.41	224.55	0.09	34.72	200.03	0.15	34.15	210.09	0.14	13.30	213.99	0.06	28.35	184.78	0.13	23.33	223.03	0.09	96.45	241.12	0.29	140.71	357.12	0.28	63.77	340.62	0.16	62.69	337.77	0.16	128.99	385.16	0.25	150.87	295.63	0.34	0.11	0.2466666666666667	-0.13666666666666671	1.7655036097950346e-05	0.00011311289084805453	N
AT1G07705|AT1G07705|1|+	387.8	2385989	1:2385788-2386157	14.48	73.83	0.16	35.39	11.57	0.75	11.92	44.41	0.21	7.98	35.99	0.18	14.26	34.25	0.29	16.70	36.67	0.31	17.09	53.23	0.24	28.08	64.87	0.30	12.62	109.94	0.10	15.99	75.08	0.18	37.25	81.79	0.31	47.94	66.41	0.42	0.3166666666666667	0.25833333333333336	0.05833333333333335	0.7070134928746328	0.8681073864691987	N
AT1G07750|AT1G07750|1|-	5445.2	2404252	1:2403992-2404453	77.12	231.71	0.25	95.76	220.63	0.30	94.02	167.49	0.36	147.99	143.94	0.51	105.84	232.56	0.31	105.03	237.69	0.31	141.27	178.66	0.44	175.55	131.01	0.57	128.65	189.47	0.40	123.78	111.98	0.53	193.29	93.16	0.67	133.85	160.34	0.45	0.34	0.5100000000000001	-0.1700000000000001	2.418789035756169e-05	0.0001509768005547051	N
AT1G07753|AT1G07753|1|+	202.8	19118125	1:19117924-19118570	67.29	11.82	0.85	66.86	31.00	0.68	72.16	27.00	0.73	55.12	0.00	1.00	48.68	10.75	0.82	69.59	5.79	0.92	66.13	0.00	1.00	51.79	33.26	0.61	66.22	13.89	0.83	56.54	43.92	0.56	43.79	33.46	0.57	53.37	57.17	0.48	0.8333333333333334	0.6749999999999999	0.15833333333333344	0.021348037048267453	0.05794557824015814	N
AT1G07770|AT1G07770|1|-	313887.4	2408310	1:2407411-2408511	522.40	1192.94	0.30	539.25	1204.08	0.31	537.53	1224.60	0.31	273.29	1157.03	0.19	437.29	1162.82	0.27	579.72	993.43	0.37	396.28	1881.86	0.17	625.15	2689.02	0.19	730.12	1862.09	0.28	694.84	1851.58	0.27	436.57	2784.86	0.14	746.19	2218.37	0.25	0.2916666666666667	0.21666666666666667	0.07500000000000001	3.400952542712881e-09	4.27788169834657e-08	N
AT1G07780|AT1G07780|1|-	4122.1	2410283	1:2409865-2410896	14.84	86.69	0.15	11.41	102.66	0.10	9.87	108.56	0.08	16.86	79.55	0.17	8.37	65.50	0.11	6.57	82.62	0.07	20.71	81.31	0.20	41.08	65.48	0.39	21.89	97.19	0.18	23.70	96.41	0.20	33.54	70.74	0.32	25.46	75.87	0.25	0.11333333333333333	0.25666666666666665	-0.1433333333333333	0.012030240821647485	0.035727586086285436	N
AT1G07807|AT1G07807|1|+	53384.7	19563681	1:19563480-19563813	0.00	166.34	0.00	5.06	176.48	0.03	0.04	166.49	0.00	0.00	215.85	0.00	0.74	159.63	0.00	7.10	169.10	0.04	0.00	232.50	0.00	0.00	213.67	0.00	0.00	225.62	0.00	0.00	191.74	0.00	0.00	209.63	0.00	0.00	211.82	0.00	0.011666666666666667	0.0	0.011666666666666667	0.204288805823394	0.3586603999058421	N
AT1G07810|AT1G07810|1|+	882.0	2420472	1:2419988-2420829	67.66	76.39	0.47	80.28	52.68	0.60	77.00	68.47	0.53	94.75	35.60	0.73	87.19	47.16	0.65	72.36	59.46	0.55	82.00	58.61	0.58	116.34	4.42	0.96	143.49	13.58	0.91	126.95	0.00	1.00	123.05	12.51	0.91	140.24	18.77	0.88	0.5883333333333334	0.8733333333333334	-0.28500000000000003	5.4729176472978225e-08	5.629853277556777e-07	N
AT1G07830|AT1G07830|1|+	557.9	2423560	1:2423285-2423803	12.13	69.20	0.15	7.10	91.48	0.07	19.38	97.22	0.17	4.21	82.74	0.05	17.13	80.11	0.18	12.62	77.73	0.14	33.26	103.22	0.24	38.75	161.83	0.19	30.41	144.00	0.17	42.66	128.69	0.25	42.54	123.09	0.26	28.33	131.74	0.18	0.12666666666666668	0.21499999999999997	-0.08833333333333329	0.0971002750243607	0.1998941431471411	N
AT1G07840|AT1G07840|1|+	174.1	2426615	1:2426414-2426728	NA	NA	NA	15.13	23.46	0.39	10.46	29.05	0.26	11.95	24.59	0.33	NA	NA	NA	7.86	25.85	0.23	5.31	25.84	0.17	15.62	39.72	0.28	46.21	36.58	0.56	29.45	48.90	0.38	45.53	27.83	0.62	32.47	25.77	0.56	0.3025	0.4283333333333334	-0.1258333333333334	0.1431812205077377	0.2719923127863486	N
AT1G07877|AT1G07877|1|-	6993.2	19925415	1:19925023-19925616	NA	NA	NA	8.05	25.85	0.24	5.88	34.79	0.14	NA	NA	NA	0.04	33.50	0.00	2.89	32.28	0.08	6.54	59.52	0.10	2.24	65.27	0.03	5.69	50.74	0.10	11.95	35.90	0.25	1.15	74.63	0.02	1.38	63.31	0.02	0.115	0.08666666666666667	0.028333333333333335	0.45384768303713324	0.6436255781846715	N
AT1G07890|AT1G07890|1|+	3418330.8	2439557	1:2439278-2439665	3890.21	0.00	1.00	4716.95	0.00	1.00	3149.48	0.00	1.00	4513.95	0.00	1.00	3733.65	0.00	1.00	3075.29	476.69	0.87	1988.19	0.00	1.00	2341.24	0.00	1.00	2491.27	0.00	1.00	2500.78	0.00	1.00	2749.52	0.00	1.00	2962.05	0.00	1.00	0.9783333333333334	1.0	-0.021666666666666612	1.2571695419980157e-17	3.8320532941209453e-16	N
AT1G07893|AT1G07893|1|+	1007.0	19968580	1:19967683-19969121	151.66	64.64	0.70	190.51	17.71	0.91	177.30	24.50	0.88	193.66	12.23	0.94	148.19	22.35	0.87	170.53	46.88	0.78	119.67	47.53	0.72	63.83	62.67	0.50	120.12	23.15	0.84	44.59	96.39	0.32	72.35	29.81	0.71	117.95	0.00	1.00	0.8466666666666667	0.6816666666666666	0.16500000000000004	0.00026610226377841057	0.0013109857189717727	N
AT1G07910|AT1G07910|1|+	241.0	2454331	1:2453988-2454645	14.84	42.95	0.26	22.21	28.29	0.44	19.33	38.58	0.33	12.66	42.10	0.23	13.26	39.83	0.25	19.10	58.86	0.24	16.19	48.75	0.25	16.37	59.70	0.22	58.75	3.08	0.95	9.85	85.89	0.10	33.08	48.53	0.41	28.79	30.04	0.49	0.2916666666666667	0.4033333333333333	-0.11166666666666664	0.34717795664570616	0.533958730101901	N
AT1G07920|AT1G07920|1|+	699926.4	2456528	1:2456114-2457321	4004.38	3010.42	0.57	3799.30	3054.97	0.55	3936.07	3475.19	0.53	3775.87	3306.34	0.53	3546.56	2976.76	0.54	3309.28	2995.75	0.52	3717.98	2971.44	0.56	3755.76	2398.15	0.61	3939.05	3019.63	0.57	3703.04	2287.01	0.62	3833.10	2180.03	0.64	3615.28	1963.57	0.65	0.54	0.6083333333333333	-0.06833333333333325	2.8163280489758576e-12	5.290331157405122e-11	N
AT1G07930|AT1G07930|1|+	1116742.9	2459958	1:2459571-2460817	1566.88	4842.42	0.24	1456.03	4783.17	0.23	1452.97	5262.78	0.22	1545.77	4905.15	0.24	1482.89	4450.92	0.25	1369.85	4337.42	0.24	2065.23	4192.26	0.33	2424.41	3338.60	0.42	2473.24	4065.42	0.38	2211.66	3418.08	0.39	2571.65	3042.48	0.46	2219.97	3029.40	0.42	0.23666666666666666	0.39999999999999997	-0.1633333333333333	1.5237378406313114e-81	3.221570834543264e-79	N
AT1G07940|AT1G07940|1|-	279934.1	2463645	1:2462949-2464237	2041.87	2842.26	0.42	1955.89	2731.69	0.42	1963.65	3138.33	0.38	1859.36	2986.72	0.38	1736.50	2807.07	0.38	1634.24	2652.09	0.38	2523.09	2103.00	0.55	3013.78	1309.52	0.70	2995.52	1718.61	0.64	2917.82	1280.11	0.70	3267.30	892.01	0.79	2751.28	1144.14	0.71	0.3933333333333333	0.6816666666666666	-0.28833333333333333	7.494905824352383e-158	3.5465180560280777e-155	N
AT1G07950|AT1G07950|1|-	1670.8	2465888	1:2465729-2466294	65.72	44.80	0.59	102.90	41.89	0.71	60.20	67.01	0.47	59.67	29.58	0.67	55.53	64.88	0.46	58.94	96.75	0.38	86.19	58.73	0.59	97.48	108.69	0.47	54.68	87.50	0.38	98.28	49.41	0.67	63.15	126.77	0.33	82.66	119.03	0.41	0.5466666666666666	0.47500000000000003	0.0716666666666666	0.23923355060058688	0.406346182888481	N
AT1G07960|AT1G07960|1|+	1309.1	2468953	1:2468740-2469218	73.68	125.94	0.37	49.07	137.74	0.26	61.28	105.38	0.37	67.36	198.69	0.25	67.25	117.86	0.36	68.75	182.22	0.27	65.48	133.80	0.33	141.99	132.16	0.52	107.35	150.02	0.42	100.94	116.16	0.46	143.28	166.54	0.46	122.89	141.12	0.47	0.3133333333333333	0.44333333333333336	-0.13000000000000006	0.0021007783725401686	0.008032102611747463	N
AT1G07970|AT1G07970|1|-	186.7	2469467	1:2469316-2469668	25.93	23.88	0.52	32.05	38.25	0.46	36.55	23.95	0.60	28.75	21.38	0.57	21.86	31.51	0.41	28.11	20.78	0.57	27.34	13.84	0.66	71.28	15.01	0.83	74.20	0.00	1.00	66.16	3.85	0.95	74.30	18.77	0.80	103.59	0.00	1.00	0.5216666666666666	0.8733333333333334	-0.3516666666666668	1.7302915329259618e-06	1.3810367038301431e-05	N
AT1G07980|AT1G07980|1|-	505.5	2473395	1:2473165-2473596	11.54	79.88	0.13	17.54	91.37	0.16	10.78	93.93	0.10	10.20	100.68	0.09	15.91	93.48	0.15	7.90	96.35	0.08	35.46	85.56	0.29	20.89	146.07	0.13	22.65	87.62	0.21	22.75	104.21	0.18	31.89	122.53	0.21	18.48	131.23	0.12	0.11833333333333333	0.19000000000000003	-0.0716666666666667	0.20631701882918782	0.36113655383224225	N
AT1G07990|AT1G07990|1|+	3081.0	2482412	1:2482211-2483196	197.85	0.00	1.00	174.48	7.13	0.96	195.32	0.00	1.00	206.58	0.00	1.00	173.20	0.00	1.00	157.82	6.80	0.96	245.57	0.00	1.00	226.17	0.00	1.00	263.87	0.00	1.00	209.64	0.00	1.00	244.02	0.00	1.00	254.09	0.00	1.00	0.9866666666666667	1.0	-0.013333333333333308	0.19005799502911755	0.3388242369221997	N
AT1G08010|AT1G08010|1|-	768.3	2486260	1:2485848-2486846	81.09	27.08	0.75	59.91	62.28	0.49	84.66	50.04	0.63	85.42	16.24	0.84	64.52	58.38	0.52	60.08	67.34	0.47	64.75	55.64	0.54	76.20	38.68	0.66	58.16	33.68	0.63	103.62	0.00	1.00	99.73	21.63	0.82	115.81	7.98	0.94	0.6166666666666667	0.765	-0.14833333333333332	0.010788879877701506	0.032665782859451514	N
AT1G08030|AT1G08030|1|-	1946.5	2489544	1:2489409-2489745	14.98	130.89	0.10	22.91	112.92	0.17	21.73	85.98	0.20	17.79	111.00	0.14	14.59	83.14	0.15	12.97	91.32	0.12	18.77	68.24	0.22	10.59	154.22	0.06	10.21	64.08	0.14	12.27	144.16	0.08	19.99	90.61	0.18	38.47	101.78	0.27	0.1466666666666667	0.15833333333333333	-0.01166666666666663	1.0	1.0	N
AT1G08040|AT1G08040|1|-	1639.0	2495401	1:2495313-2495602	24.21	109.97	0.18	32.36	94.11	0.26	28.11	109.57	0.20	11.09	100.12	0.10	13.05	71.57	0.15	13.28	68.26	0.16	53.82	97.86	0.35	46.55	159.12	0.23	63.83	166.95	0.28	46.91	163.54	0.22	66.20	148.40	0.31	59.11	171.81	0.26	0.17500000000000002	0.275	-0.1	0.07401039185959357	0.16242077383144465	N
AT1G08060|AT1G08060|1|-	338.9	2502017	1:2501704-2502504	29.50	31.11	0.49	47.62	0.00	1.00	34.29	24.83	0.58	32.41	22.59	0.59	63.05	1.91	0.97	29.42	28.49	0.51	54.38	0.17	1.00	33.00	26.04	0.56	50.04	16.63	0.75	81.64	0.00	1.00	65.19	0.00	1.00	47.79	0.00	1.00	0.69	0.8850000000000001	-0.19500000000000017	0.007499377634054134	0.024070192360980597	N
AT1G08110|AT1G08110|1|+	62391.1	2537731	1:2537530-2537932	282.34	544.32	0.34	327.09	494.27	0.40	257.74	504.94	0.34	333.04	413.85	0.45	251.22	608.56	0.29	266.56	468.03	0.36	480.27	621.78	0.44	612.27	913.92	0.40	538.56	944.72	0.36	585.07	882.18	0.40	668.05	1024.95	0.39	710.81	876.07	0.45	0.36333333333333334	0.40666666666666673	-0.04333333333333339	0.04210882446584839	0.10236593348224202	N
AT1G08130|AT1G08130|1|-	687.7	2542780	1:2542663-2542981	5.54	59.78	0.08	12.30	68.48	0.15	5.76	54.23	0.10	NA	NA	NA	2.83	43.13	0.06	9.62	79.07	0.11	4.47	73.86	0.06	26.76	112.42	0.19	8.76	64.00	0.12	7.44	83.99	0.08	7.27	88.40	0.08	7.38	91.09	0.07	0.09999999999999999	0.10000000000000002	-2.7755575615628914e-17	1.0	1.0	N
AT1G08190|AT1G08190|1|+	4898.9	2573144	1:2572666-2573448	69.08	231.32	0.23	55.50	223.79	0.20	94.48	181.16	0.34	48.57	225.72	0.18	55.84	222.54	0.20	74.50	215.51	0.26	158.45	151.05	0.51	242.32	95.03	0.72	163.54	208.00	0.44	161.48	125.87	0.56	209.68	44.85	0.82	171.67	133.78	0.56	0.235	0.6016666666666667	-0.3666666666666667	4.236058277623514e-19	1.4220848346197588e-17	N
AT1G08200|AT1G08200|1|-	54532.9	2574170	1:2573818-2574371	280.36	413.25	0.40	260.21	492.02	0.35	238.27	515.47	0.32	271.25	483.78	0.36	286.80	422.28	0.40	277.37	439.55	0.39	569.36	677.71	0.46	708.01	583.49	0.55	662.60	864.08	0.43	733.97	484.92	0.60	861.41	487.66	0.64	746.83	669.35	0.53	0.37000000000000005	0.535	-0.16499999999999998	1.1331746928899981e-12	2.2122508690074483e-11	N
AT1G08210|AT1G08210|1|-	1016.5	2577078	1:2576984-2577279	40.31	58.59	0.41	18.66	38.44	0.33	46.36	53.90	0.46	6.81	69.97	0.09	28.42	54.18	0.34	22.77	42.66	0.35	28.99	71.77	0.29	82.88	126.81	0.40	27.09	99.49	0.21	30.85	147.81	0.17	93.31	89.58	0.51	96.49	89.27	0.52	0.33	0.3499999999999999	-0.019999999999999907	0.776683892863766	0.9233051613096355	N
AT1G08230|AT1G08230|1|-	903.9	2583791	1:2583594-2584095	81.72	94.65	0.46	54.95	111.27	0.33	60.14	110.91	0.35	53.67	96.43	0.36	67.02	153.77	0.30	69.66	118.45	0.37	43.92	97.18	0.31	63.54	60.65	0.51	60.14	69.81	0.46	53.79	98.11	0.35	54.82	37.27	0.60	67.54	76.82	0.47	0.36166666666666664	0.45	-0.08833333333333337	0.1938014711210289	0.3437710136611325	N
AT1G08260|AT1G08260|1|+	204.4	2606775	1:2606568-2606892	81.99	0.00	1.00	56.22	0.00	1.00	46.63	0.00	1.00	23.46	16.03	0.59	41.38	0.00	1.00	34.83	13.93	0.71	37.42	0.00	1.00	47.06	0.00	1.00	41.82	0.00	1.00	34.62	7.38	0.82	44.46	19.49	0.70	33.57	0.00	1.00	0.8833333333333333	0.9199999999999999	-0.036666666666666625	1.0	1.0	N
AT1G08350|AT1G08350|1|-	308.4	2632985	1:2632871-2633186	27.55	31.31	0.47	37.51	18.10	0.67	30.10	32.43	0.48	14.96	24.49	0.38	10.31	39.28	0.21	6.17	29.88	0.17	24.56	42.37	0.37	35.86	33.18	0.52	36.84	21.39	0.63	15.62	20.42	0.43	80.28	13.46	0.86	35.08	37.59	0.48	0.39666666666666667	0.5483333333333333	-0.15166666666666667	0.13335157883703158	0.2570676347097902	N
AT1G08360|AT1G08360|1|+	161442.0	2637801	1:2637435-2638004	241.12	1006.56	0.19	247.97	923.86	0.21	238.34	1054.49	0.18	183.50	873.90	0.17	213.13	991.35	0.18	249.58	853.12	0.23	375.08	1419.94	0.21	664.45	1906.73	0.26	605.71	1706.19	0.26	553.18	1690.94	0.25	689.40	1920.37	0.26	667.55	1796.60	0.27	0.19333333333333336	0.25166666666666665	-0.05833333333333329	5.945990128508421e-05	0.0003398083469036398	N
AT1G08370|AT1G08370|1|+	2355.4	2640512	1:2640311-2640663	9.00	111.82	0.07	8.86	112.38	0.07	10.32	115.84	0.08	6.97	123.84	0.05	6.16	89.72	0.06	5.57	122.20	0.04	17.09	163.17	0.09	20.58	179.28	0.10	21.06	223.23	0.09	12.78	202.68	0.06	20.12	270.74	0.07	20.52	142.06	0.13	0.06166666666666667	0.09000000000000001	-0.028333333333333342	0.5166511552193125	0.7010834904465629	N
AT1G08380|AT1G08380|1|-	73517063.1	2641065	1:2640803-2641274	11535.19	32634.07	0.26	12790.08	37813.16	0.25	10414.98	34100.53	0.23	10596.58	32485.57	0.25	10719.29	34354.94	0.24	10972.71	34895.63	0.24	12254.77	37850.84	0.24	17308.02	42564.60	0.29	12595.34	47048.23	0.21	13650.89	44882.50	0.23	17308.52	47356.29	0.27	16165.38	45342.53	0.26	0.245	0.25	-0.0050000000000000044	0.012609483014969142	0.03718113730556331	N
AT1G08420|AT1G08420|1|+	1505.0	2656837	1:2656478-2657120	62.73	108.61	0.37	48.29	151.59	0.24	55.13	109.39	0.34	72.80	115.52	0.39	51.43	102.69	0.33	71.01	166.46	0.30	58.37	158.29	0.27	60.32	127.72	0.32	50.31	146.94	0.26	40.25	168.01	0.19	85.38	98.23	0.46	64.97	116.41	0.36	0.3283333333333333	0.31	0.018333333333333313	0.7399184599228774	0.8939294512162472	N
AT1G08460|AT1G08460|1|+	6546.8	2673507	1:2672921-2674721	54.50	68.39	0.44	57.09	54.38	0.51	55.58	42.71	0.57	50.93	49.76	0.51	63.62	39.24	0.62	59.40	58.82	0.50	84.28	45.86	0.65	70.77	44.40	0.61	80.84	69.38	0.54	59.84	63.82	0.48	72.58	41.56	0.64	72.23	45.53	0.61	0.525	0.5883333333333334	-0.06333333333333335	0.2926484980508518	0.47124422705093405	N
AT1G08465|AT1G08465|1|+	369.7	2679508	1:2679275-2679824	33.81	59.41	0.36	35.79	26.41	0.58	23.47	53.93	0.30	11.10	33.10	0.25	20.71	37.76	0.35	9.50	53.70	0.15	37.43	69.11	0.35	39.75	74.71	0.35	27.56	92.11	0.23	67.48	57.53	0.54	56.83	99.57	0.36	48.14	52.91	0.48	0.3316666666666666	0.385	-0.0533333333333334	0.5280962212694733	0.7120342131281895	N
AT1G08470|AT1G08470|1|-	261.2	2682361	1:2682058-2682664	81.53	0.00	1.00	41.45	29.23	0.59	81.08	0.00	1.00	51.04	39.66	0.56	67.49	0.33	1.00	43.10	24.26	0.64	77.69	13.06	0.86	94.24	0.00	1.00	90.10	0.00	1.00	81.22	8.18	0.91	78.06	14.69	0.84	116.52	0.00	1.00	0.7983333333333333	0.935	-0.13666666666666671	0.00398279611454205	0.013926485724328117	N
AT1G08480|AT1G08480|1|+	18053.5	2685522	1:2685250-2685659	151.04	121.19	0.55	125.48	184.62	0.40	105.85	188.68	0.36	89.52	178.52	0.33	126.51	187.81	0.40	90.03	233.66	0.28	203.00	283.48	0.42	327.22	253.98	0.56	231.04	362.70	0.39	214.05	315.52	0.40	327.71	332.39	0.50	247.96	306.67	0.45	0.3866666666666667	0.45333333333333337	-0.06666666666666665	0.05090282797214157	0.11986289136473241	N
AT1G08490|AT1G08490|1|-	1217.9	2685949	1:2685702-2686150	233.58	18.50	0.93	222.61	21.98	0.91	207.63	35.24	0.85	172.78	79.27	0.69	171.91	45.91	0.79	161.03	69.81	0.70	233.61	22.54	0.91	248.26	10.37	0.96	206.84	24.32	0.89	239.78	0.00	1.00	269.10	0.00	1.00	306.49	0.00	1.00	0.8116666666666666	0.96	-0.14833333333333332	2.739488865081616e-08	2.968626047144604e-07	N
AT1G08510|AT1G08510|1|-	25531.7	2691432	1:2691062-2691866	104.04	378.07	0.22	98.98	401.12	0.20	112.42	462.56	0.20	121.66	448.03	0.21	121.23	399.47	0.23	109.63	426.16	0.20	311.09	490.97	0.39	375.92	428.73	0.47	286.18	553.77	0.34	265.66	631.79	0.30	272.77	428.93	0.39	307.52	684.80	0.31	0.21	0.3666666666666667	-0.1566666666666667	1.931903404479482e-09	2.52929171677373e-08	N
AT1G08520|AT1G08520|1|+	193115.4	2700935	1:2700734-2701022	5.92	474.34	0.01	5.43	472.63	0.01	1.56	427.50	0.00	11.94	354.77	0.03	0.00	403.57	0.00	11.93	447.60	0.03	6.94	751.32	0.01	2.47	927.59	0.00	1.69	981.64	0.00	4.29	823.27	0.01	5.12	953.46	0.01	2.54	1003.10	0.00	0.013333333333333334	0.005	0.008333333333333335	0.06559359376229804	0.1472336890029265	N
AT1G08530|AT1G08530|1|+	1462.2	2702463	1:2702262-2703162	37.96	11.61	0.77	36.95	4.75	0.89	27.59	11.79	0.70	39.32	6.85	0.85	35.08	27.52	0.56	53.63	26.74	0.67	36.46	14.87	0.71	47.54	0.00	1.00	30.12	42.95	0.41	45.10	3.47	0.93	52.47	0.00	1.00	44.53	0.00	1.00	0.7400000000000001	0.8416666666666668	-0.10166666666666668	0.4855976463589216	0.6734659890954088	N
AT1G08540|AT1G08540|1|+	4544.0	2706699	1:2706409-2706860	199.24	260.32	0.43	154.77	295.81	0.34	140.08	209.44	0.40	164.37	225.78	0.42	167.31	232.11	0.42	185.13	173.19	0.52	280.13	204.54	0.58	386.11	194.93	0.66	283.18	229.27	0.55	271.47	198.28	0.58	368.76	149.72	0.71	268.48	247.58	0.52	0.42166666666666663	0.6	-0.17833333333333334	5.846013438092803e-08	5.988849024157544e-07	N
AT1G08543|AT1G08543|1|-	485.2	23179601	1:23179399-23180068	65.77	46.80	0.58	76.43	42.43	0.64	45.11	60.37	0.43	36.01	75.77	0.32	58.23	44.30	0.57	65.64	77.75	0.46	52.12	12.96	0.80	33.94	14.31	0.70	43.87	17.57	0.71	30.86	55.16	0.36	23.22	26.78	0.46	33.28	31.31	0.52	0.5	0.5916666666666667	-0.09166666666666667	0.34472163552414437	0.5313322308365787	N
AT1G08550|AT1G08550|1|+	12042.8	2709335	1:2708874-2709525	174.97	116.84	0.60	245.35	69.31	0.78	182.89	142.61	0.56	144.92	176.42	0.45	218.87	82.06	0.73	180.70	112.85	0.62	286.17	155.78	0.65	388.67	160.40	0.71	348.12	195.08	0.64	313.15	238.71	0.57	563.47	83.62	0.87	430.08	110.96	0.79	0.6233333333333334	0.7050000000000001	-0.08166666666666667	0.007510022819280796	0.024088798177919066	N
AT1G08560|AT1G08560|1|-	764.3	2710518	1:2709988-2710719	104.55	0.00	1.00	85.78	0.00	1.00	97.98	0.00	1.00	76.72	0.00	1.00	121.05	0.00	1.00	94.29	22.76	0.81	87.48	18.29	0.83	81.68	0.00	1.00	98.25	0.00	1.00	73.69	0.00	1.00	112.28	0.00	1.00	65.89	0.00	1.00	0.9683333333333334	0.9716666666666667	-0.0033333333333332993	1.0	1.0	N
AT1G08570|AT1G08570|1|+	17668.9	2714379	1:2714064-2714833	408.66	676.39	0.38	440.66	652.07	0.40	395.72	607.26	0.39	274.67	610.76	0.31	344.18	678.09	0.34	319.40	551.39	0.37	241.38	450.31	0.35	297.20	534.28	0.36	273.34	472.66	0.37	274.03	426.32	0.39	386.35	489.88	0.44	264.08	273.70	0.49	0.365	0.4000000000000001	-0.03500000000000009	0.20920090896856364	0.36491741443831727	N
AT1G08580|AT1G08580|1|-	3383.1	2715156	1:2714994-2715357	3.80	137.34	0.03	17.50	110.71	0.14	4.33	110.80	0.04	14.59	110.55	0.12	11.20	110.65	0.09	11.87	118.55	0.09	10.58	158.07	0.06	20.32	201.01	0.09	1.68	210.28	0.01	18.89	233.67	0.07	32.52	193.83	0.14	23.06	218.61	0.10	0.085	0.07833333333333332	0.006666666666666682	1.0	1.0	N
AT1G08600|AT1G08600|1|+	641.4	2733320	1:2733050-2733596	94.87	19.79	0.83	68.60	57.28	0.54	94.65	25.07	0.79	84.68	44.35	0.66	103.04	25.24	0.80	80.84	52.68	0.61	94.03	5.72	0.94	121.12	0.00	1.00	77.07	6.51	0.92	101.86	0.00	1.00	121.87	3.62	0.97	129.57	0.00	1.00	0.7050000000000001	0.9716666666666667	-0.2666666666666666	9.713030357528379e-10	1.3131752743232585e-08	N
AT1G08620|AT1G08620|1|+	485.9	2743382	1:2743059-2743761	108.40	24.01	0.82	86.24	41.73	0.67	80.51	37.54	0.68	105.04	48.18	0.69	95.94	26.87	0.78	95.86	37.78	0.72	69.53	17.45	0.80	101.26	0.00	1.00	79.34	38.57	0.67	82.77	0.00	1.00	86.98	0.00	1.00	95.34	0.00	1.00	0.7266666666666666	0.9116666666666667	-0.18500000000000016	0.001152977883020756	0.004775798759306901	N
AT1G08633|AT1G08633|1|+	29002.2	23664043	1:23663842-23664431	221.75	0.00	1.00	218.00	0.00	1.00	162.32	0.00	1.00	268.83	0.00	1.00	224.19	0.00	1.00	265.83	0.00	1.00	135.36	0.00	1.00	63.09	0.00	1.00	63.23	0.00	1.00	62.82	0.00	1.00	46.33	0.00	1.00	36.99	0.00	1.00	1.0	1.0	0.0	1.0	1.0	N
AT1G08640|AT1G08640|1|-	6856.7	2748503	1:2748361-2748776	102.78	187.97	0.35	120.61	137.27	0.47	75.67	168.53	0.31	75.83	182.86	0.29	82.16	197.75	0.29	76.51	173.78	0.31	113.87	259.48	0.31	193.82	381.97	0.34	188.60	281.23	0.40	145.56	267.89	0.35	226.37	289.43	0.44	176.59	293.21	0.38	0.33666666666666667	0.36999999999999994	-0.03333333333333327	0.37646374816975287	0.5668919935691521	N
AT1G08650|AT1G08650|1|+	1667.2	2753501	1:2753183-2753809	42.00	167.50	0.20	48.12	175.71	0.21	38.35	140.46	0.21	48.84	147.53	0.25	52.52	147.23	0.26	60.45	254.70	0.19	28.72	81.82	0.26	32.16	88.58	0.27	35.74	126.58	0.22	39.64	74.46	0.35	41.49	71.27	0.37	45.93	88.25	0.34	0.21999999999999997	0.3016666666666667	-0.08166666666666672	0.11945327887081736	0.2356575803333953	N
AT1G08660|AT1G08660|1|-	2856.2	2757139	1:2756904-2757683	52.07	64.61	0.45	45.37	72.66	0.38	51.52	77.44	0.40	32.87	88.62	0.27	38.40	100.15	0.28	28.41	98.87	0.22	57.45	71.26	0.45	81.24	15.62	0.84	52.68	65.40	0.45	92.34	49.82	0.65	97.45	47.00	0.67	96.31	34.43	0.74	0.3333333333333333	0.6333333333333333	-0.3	2.81541502125805e-06	2.1587020884445403e-05	N
AT1G08680|AT1G08680|1|+	922.5	2768538	1:2768333-2768965	19.16	178.00	0.10	15.88	117.69	0.12	13.19	166.36	0.07	11.01	98.31	0.10	15.04	141.99	0.10	7.90	134.70	0.06	10.55	145.10	0.07	14.09	227.08	0.06	9.89	166.99	0.06	18.74	207.01	0.08	19.23	229.48	0.08	30.79	200.69	0.13	0.09166666666666667	0.08	0.011666666666666672	0.8490327858158695	0.9759212021575818	N
AT1G08700|AT1G08700|1|-	3463.6	2770723	1:2769615-2770924	240.67	0.00	1.00	242.62	0.00	1.00	224.25	0.00	1.00	207.23	0.00	1.00	215.58	0.00	1.00	183.67	0.00	1.00	149.86	0.00	1.00	188.41	0.00	1.00	162.25	0.00	1.00	167.13	0.00	1.00	173.03	0.00	1.00	178.54	0.00	1.00	1.0	1.0	0.0	1.0	1.0	N
AT1G08710|AT1G08710|1|+	744.3	2772898	1:2772697-2773531	24.48	44.99	0.35	24.70	71.67	0.26	31.90	75.92	0.30	16.51	79.41	0.17	32.72	49.36	0.40	41.23	72.55	0.36	26.49	51.70	0.34	36.79	39.93	0.48	36.49	51.47	0.41	33.01	109.01	0.23	61.78	44.05	0.58	36.37	82.24	0.31	0.30666666666666664	0.39166666666666666	-0.08500000000000002	0.29130256242165453	0.4697324889390726	N
AT1G08720|AT1G08720|1|+	1795.0	2778938	1:2778737-2779308	45.99	32.28	0.59	60.50	32.56	0.65	50.57	57.73	0.47	38.67	41.35	0.48	43.90	46.47	0.49	48.91	65.04	0.43	64.86	25.38	0.72	83.67	45.76	0.65	59.12	31.88	0.65	100.39	43.50	0.70	79.84	36.66	0.69	90.73	66.08	0.58	0.5183333333333333	0.6649999999999999	-0.1466666666666666	0.048439882774986766	0.11504472159059356	N
AT1G08733|AT1G08733|1|+	2496.7	24135364	1:24135163-24135658	7.00	23.84	0.23	NA	NA	NA	NA	NA	NA	NA	NA	NA	NA	NA	NA	NA	NA	NA	NA	NA	NA	NA	NA	NA	NA	NA	NA	NA	NA	NA	NA	NA	NA	NA	NA	NA	NA	NA	NA	NA	NA	N
AT1G08747|AT1G08747|1|-	35031.0	24229374	1:24229258-24229575	9.60	78.06	0.11	1.93	76.76	0.02	7.18	69.49	0.09	19.13	69.02	0.22	13.68	70.16	0.16	6.46	87.81	0.07	7.30	84.17	0.08	0.18	73.78	0.00	0.00	84.59	0.00	0.00	51.74	0.00	10.89	74.80	0.13	0.77	54.17	0.01	0.11166666666666665	0.036666666666666674	0.07499999999999998	0.14248832880708437	0.27090021563438393	N
AT1G08750|AT1G08750|1|+	186.9	2804456	1:2804252-2804711	1.57	32.88	0.05	2.72	62.01	0.04	2.78	54.99	0.05	2.65	28.34	0.09	2.48	51.54	0.05	3.73	46.56	0.07	2.22	34.58	0.06	6.76	60.95	0.10	6.44	87.55	0.07	3.89	67.06	0.05	6.04	55.73	0.10	13.08	76.84	0.15	0.05833333333333334	0.08833333333333333	-0.029999999999999992	0.4682778278878654	0.6569641078246109	N
AT1G08780|AT1G08780|1|-	1156.1	2809983	1:2809778-2810185	82.99	59.84	0.58	98.95	38.23	0.72	96.48	56.78	0.63	41.31	109.49	0.27	108.35	39.46	0.73	73.32	67.39	0.52	167.69	74.58	0.69	162.39	138.23	0.54	179.97	138.29	0.57	203.92	184.16	0.53	172.88	198.25	0.47	205.74	69.09	0.75	0.575	0.5916666666666667	-0.01666666666666672	1.0	1.0	N
AT1G08797|AT1G08797|1|-	264558.3	24555657	1:24555535-24555858	4.62	611.79	0.01	7.32	516.46	0.01	7.38	675.30	0.01	16.70	626.86	0.03	7.36	600.12	0.01	2.41	653.72	0.00	1.65	524.82	0.00	3.40	350.33	0.01	2.46	389.46	0.01	0.00	378.25	0.00	3.73	364.02	0.01	0.00	353.47	0.00	0.011666666666666665	0.005	0.006666666666666665	0.1605724441731411	0.2971729148677687	N
AT1G08820|AT1G08820|1|-	2011.4	2821630	1:2821354-2821923	14.87	142.56	0.09	13.64	134.46	0.09	12.45	150.82	0.08	6.06	124.52	0.05	7.24	120.23	0.06	9.34	114.18	0.08	15.39	155.11	0.09	20.44	211.37	0.09	7.57	168.40	0.04	27.49	218.76	0.11	23.14	192.03	0.11	38.69	181.74	0.18	0.075	0.10333333333333333	-0.028333333333333335	0.3454476208810627	0.5320385940321016	N
AT1G08845|AT1G08845|1|+	258.2	2840818	1:2840503-2841134	24.83	35.28	0.41	22.65	23.48	0.49	20.63	31.92	0.39	41.87	19.09	0.69	25.55	42.43	0.38	21.08	36.03	0.37	27.69	27.66	0.50	30.18	66.79	0.31	29.18	65.28	0.31	38.01	14.15	0.73	49.24	45.34	0.52	31.21	63.90	0.33	0.455	0.45	0.0050000000000000044	0.7286167899877024	0.8862013515431822	N
AT1G08880|AT1G08880|1|-	4926.5	2847100	1:2846894-2847365	127.39	335.01	0.28	118.85	316.08	0.27	109.41	323.79	0.25	95.04	242.52	0.28	96.91	324.70	0.23	182.54	286.48	0.39	142.98	311.72	0.31	299.44	394.72	0.43	131.88	392.20	0.25	190.49	254.64	0.43	252.01	393.06	0.39	233.74	366.33	0.39	0.2833333333333334	0.3666666666666667	-0.08333333333333331	0.005129648867391811	0.017308428113844625	N
AT1G08890|AT1G08890|1|+	1023.3	2852096	1:2851895-2852270	7.76	75.96	0.09	14.12	69.98	0.17	17.08	112.79	0.13	15.36	84.33	0.15	22.32	87.27	0.20	9.22	113.24	0.08	26.82	114.01	0.19	26.49	189.76	0.12	33.64	117.75	0.22	25.99	192.53	0.12	16.63	132.01	0.11	40.95	206.69	0.17	0.13666666666666666	0.155	-0.01833333333333334	0.8620725578125581	0.9828378851518346	N
AT1G08900|AT1G08900|1|+	4595.2	2855667	1:2855281-2855941	21.51	78.21	0.22	12.88	82.67	0.13	12.28	97.86	0.11	20.22	59.65	0.25	18.79	62.16	0.23	3.61	116.74	0.03	41.39	117.63	0.26	38.39	168.53	0.19	51.13	97.72	0.34	58.15	106.60	0.35	58.54	125.53	0.32	66.86	144.29	0.32	0.16166666666666665	0.2966666666666667	-0.13500000000000004	0.0075337326112812995	0.024149258373645895	N
AT1G08910|AT1G08910|1|+	477.3	2860571	1:2859953-2861170	77.91	29.68	0.72	64.55	35.80	0.64	90.88	25.34	0.78	80.73	38.91	0.67	112.47	0.00	1.00	86.25	34.25	0.72	72.55	11.98	0.86	57.19	1.98	0.97	54.03	18.78	0.74	67.92	0.00	1.00	56.29	8.37	0.87	96.70	0.00	1.00	0.7549999999999999	0.9066666666666667	-0.15166666666666684	0.005842907717850176	0.01938020842978947	N
AT1G08920|AT1G08920|1|+	1161.8	2870551	1:2870236-2870745	9.40	72.78	0.11	6.78	95.34	0.07	9.62	106.82	0.08	5.01	81.60	0.06	3.95	77.38	0.05	4.65	67.89	0.06	7.77	170.64	0.04	13.43	196.26	0.06	17.94	184.48	0.09	33.71	364.96	0.08	25.15	228.59	0.10	16.41	284.60	0.05	0.07166666666666667	0.06999999999999999	0.0016666666666666774	1.0	1.0	N
AT1G08940|AT1G08940|1|+	250.7	2878917	1:2878716-2879169	29.36	19.57	0.60	34.91	69.67	0.33	46.60	40.36	0.54	33.62	24.95	0.57	44.51	4.73	0.90	52.05	28.04	0.65	36.14	28.78	0.56	50.42	13.53	0.79	69.56	0.00	1.00	43.20	23.70	0.65	34.27	39.93	0.46	53.45	35.85	0.60	0.5983333333333333	0.6766666666666666	-0.07833333333333337	0.2261184706573716	0.38795751876363666	N
AT1G08980|AT1G08980|1|+	2498.8	2886517	1:2886314-2886621	54.24	148.62	0.27	116.95	114.65	0.50	91.67	139.92	0.40	68.50	152.65	0.31	52.94	113.97	0.32	55.42	156.53	0.26	127.49	193.75	0.40	188.54	220.66	0.46	139.50	185.18	0.43	139.63	294.18	0.32	155.58	200.31	0.44	149.56	232.74	0.39	0.3433333333333333	0.40666666666666673	-0.06333333333333341	0.18401418335328437	0.3298248448740236	N
AT1G09010|AT1G09010|1|-	2924.1	2895409	1:2895182-2895993	221.28	48.98	0.82	255.78	0.00	1.00	286.01	6.36	0.98	214.42	1.23	0.99	261.40	25.97	0.91	244.42	38.62	0.86	298.67	0.00	1.00	249.53	0.00	1.00	317.16	0.00	1.00	244.88	19.12	0.93	228.68	41.75	0.85	375.37	0.00	1.00	0.9266666666666667	0.9633333333333334	-0.036666666666666625	0.03809434862740173	0.09418849024894027	N
AT1G09020|AT1G09020|1|-	3083.3	2900042	1:2899776-2900243	22.40	146.11	0.13	20.91	125.80	0.14	18.55	157.94	0.11	10.23	112.29	0.08	13.61	143.28	0.09	12.35	141.56	0.08	32.34	164.22	0.16	41.16	185.17	0.18	34.20	178.39	0.16	15.91	93.15	0.15	31.40	168.01	0.16	42.07	156.01	0.21	0.105	0.17	-0.06500000000000002	0.11678855349322445	0.23131908631894985	N
AT1G09130|AT1G09130|1|-	169681.9	2939951	1:2939568-2940152	269.07	177.85	0.60	265.92	253.43	0.51	219.37	192.34	0.53	243.38	165.15	0.60	227.27	195.10	0.54	250.48	184.20	0.58	390.27	256.13	0.60	636.58	289.20	0.69	565.69	263.67	0.68	607.99	179.46	0.77	612.87	276.68	0.69	520.54	216.65	0.71	0.5599999999999999	0.6900000000000001	-0.13000000000000012	3.075093004677884e-06	2.3379647427302322e-05	N
AT1G09140|AT1G09140|1|-	4565.2	2942700	1:2942538-2942901	100.91	213.46	0.32	78.03	287.83	0.21	75.81	202.55	0.27	101.91	237.84	0.30	97.65	252.61	0.28	83.12	316.66	0.21	76.77	273.27	0.22	151.89	345.43	0.31	118.09	203.57	0.37	102.99	214.94	0.32	125.51	339.62	0.27	112.29	272.23	0.29	0.265	0.2966666666666667	-0.031666666666666676	0.3625204732198384	0.5515795348929007	N
AT1G09160|AT1G09160|1|-	1825.7	2953079	1:2952597-2953418	33.76	89.12	0.27	46.41	115.64	0.29	41.15	110.35	0.27	43.44	117.46	0.27	35.81	84.50	0.30	36.90	105.91	0.26	50.31	145.60	0.26	48.14	151.72	0.24	76.67	177.77	0.30	43.05	224.68	0.16	60.44	133.37	0.31	81.33	131.95	0.38	0.27666666666666667	0.27499999999999997	0.0016666666666667052	1.0	1.0	N
AT1G09193|AT1G09193|1|-	401506.9	26687493	1:26687058-26688031	542.21	152.83	0.78	619.72	80.57	0.88	475.52	151.09	0.76	567.64	156.22	0.78	507.32	233.34	0.68	506.27	224.51	0.69	586.29	239.03	0.71	665.86	156.34	0.81	547.02	316.33	0.63	465.28	228.08	0.67	510.80	303.66	0.63	399.78	343.06	0.54	0.7616666666666667	0.6649999999999999	0.09666666666666679	4.682673256974372e-05	0.0002741999066267197	N
AT1G09210|AT1G09210|1|-	20154.5	2973027	1:2972638-2973228	18.40	426.71	0.04	15.85	371.65	0.04	14.56	354.16	0.04	12.76	332.58	0.04	25.37	326.62	0.07	12.56	352.75	0.03	15.86	385.70	0.04	13.95	449.55	0.03	16.77	416.34	0.04	2.72	485.21	0.01	38.74	463.52	0.08	9.77	425.93	0.02	0.043333333333333335	0.03666666666666667	0.006666666666666668	0.5930269081307711	0.771285772103661	N
AT1G09253|AT1G09253|1|-	52340.9	26932182	1:26932071-26932467	535.89	0.00	1.00	579.14	0.00	1.00	537.84	0.00	1.00	698.78	0.00	1.00	607.19	0.00	1.00	581.75	0.00	1.00	564.08	0.00	1.00	492.42	0.00	1.00	496.68	6.94	0.99	292.24	61.98	0.83	438.46	0.00	1.00	353.51	28.26	0.93	1.0	0.9583333333333334	0.04166666666666663	1.434097986107227e-06	1.1623680006482476e-05	N
AT1G09270|AT1G09270|1|+	3800.2	2997849	1:2997455-2998100	108.65	197.34	0.36	75.92	168.10	0.31	90.54	190.04	0.32	49.38	223.08	0.18	90.04	186.05	0.33	177.24	139.54	0.56	118.42	210.45	0.36	141.17	192.40	0.42	128.71	180.73	0.42	136.01	149.17	0.48	116.94	209.52	0.36	119.89	190.42	0.39	0.3433333333333333	0.405	-0.0616666666666667	0.20388961932652602	0.3580228215670064	N
AT1G09280|AT1G09280|1|-	1187.5	2998629	1:2998222-2998915	124.50	15.73	0.89	123.82	26.33	0.82	125.54	37.06	0.77	103.71	76.88	0.57	134.47	40.39	0.77	134.95	43.45	0.76	116.73	49.55	0.70	139.95	44.90	0.76	104.81	14.27	0.88	102.00	3.29	0.97	122.01	7.23	0.94	172.04	0.00	1.00	0.7633333333333333	0.875	-0.11166666666666669	0.019134931843407466	0.052773749022464615	N
AT1G09290|AT1G09290|1|-	249.0	3001639	1:3001439-3001840	27.86	45.29	0.38	22.15	42.04	0.35	30.07	42.84	0.41	53.50	0.00	1.00	19.42	45.99	0.30	8.31	44.00	0.16	47.04	16.12	0.74	39.02	40.79	0.49	41.43	17.67	0.70	48.73	23.21	0.68	60.17	14.80	0.80	53.68	56.52	0.49	0.4333333333333333	0.65	-0.21666666666666673	0.01638824522057122	0.0462116892045449	N
AT1G09330|AT1G09330|1|-	1131.4	3012879	1:3012739-3013091	50.80	109.66	0.32	50.81	137.81	0.27	61.25	129.96	0.32	36.64	116.80	0.24	60.99	82.82	0.42	69.53	111.52	0.38	81.28	131.31	0.38	168.80	160.79	0.51	82.58	96.81	0.46	103.82	163.19	0.39	147.35	173.69	0.46	134.30	104.86	0.56	0.325	0.46	-0.135	0.004881715932053912	0.016603479244011916	N
AT1G09340|AT1G09340|1|+	947778.9	3018079	1:3017859-3018542	279.78	4379.86	0.06	263.81	4630.97	0.05	227.99	3813.19	0.06	259.32	4262.96	0.06	246.71	4471.18	0.05	216.23	4104.94	0.05	367.62	5100.44	0.07	671.84	7546.57	0.08	497.95	6952.74	0.07	426.59	6292.22	0.06	579.81	7574.14	0.07	528.92	6786.79	0.07	0.05499999999999999	0.07	-0.015000000000000013	0.0005193210630697193	0.0023650290576186068	N
AT1G09390|AT1G09390|1|+	1169.4	3033419	1:3033183-3033512	92.15	15.89	0.85	112.26	19.32	0.85	79.15	55.85	0.59	56.00	37.03	0.60	61.52	74.81	0.45	110.02	8.30	0.93	167.62	40.29	0.81	258.42	0.00	1.00	155.09	130.49	0.54	221.32	0.00	1.00	226.71	24.98	0.90	273.90	0.00	1.00	0.7116666666666668	0.875	-0.16333333333333322	0.0002648255626564947	0.001306639332729686	N
AT1G09415|AT1G09415|1|-	17629.6	3037938	1:3037754-3038408	210.69	117.53	0.64	281.83	40.29	0.87	309.49	58.38	0.84	253.64	18.11	0.93	244.35	102.52	0.70	253.05	77.99	0.76	293.10	0.00	1.00	299.88	0.00	1.00	224.07	16.33	0.93	276.70	0.00	1.00	325.82	0.00	1.00	471.80	0.00	1.00	0.79	0.9883333333333333	-0.19833333333333325	7.940893138198661e-20	2.78829170015124e-18	N
AT1G09420|AT1G09420|1|-	100.5	3038621	1:3038462-3038877	47.32	0.00	1.00	24.92	21.97	0.53	47.03	4.29	0.92	11.08	24.67	0.31	39.66	0.00	1.00	34.66	13.73	0.72	49.74	19.52	0.72	67.86	20.24	0.77	61.40	23.39	0.72	51.51	17.92	0.74	62.47	45.81	0.58	56.52	9.81	0.85	0.7466666666666667	0.73	0.01666666666666672	0.6696314238463248	0.8384680248380398	N
AT1G09430|AT1G09430|1|+	5711.9	3045125	1:3044904-3045259	226.46	97.20	0.70	225.91	93.55	0.71	176.35	161.89	0.52	164.87	99.89	0.62	209.85	117.71	0.64	170.33	197.38	0.46	304.91	107.24	0.74	293.96	138.90	0.68	252.99	124.12	0.67	310.71	149.38	0.68	317.09	181.04	0.64	376.35	104.38	0.78	0.6083333333333333	0.6983333333333334	-0.09000000000000008	0.008697197773707241	0.0272631086048356	N
AT1G09500|AT1G09500|1|+	3766.3	3068541	1:3068340-3068796	24.97	306.27	0.08	29.80	395.11	0.07	10.53	183.20	0.05	27.61	368.43	0.07	23.03	332.60	0.06	14.34	261.86	0.05	7.63	137.23	0.05	14.36	186.66	0.07	13.64	198.43	0.06	20.42	314.63	0.06	14.80	239.36	0.06	16.56	252.46	0.06	0.06333333333333334	0.06	0.003333333333333341	0.8616163952603324	0.9825432774503011	N
AT1G09520|AT1G09520|1|-	1660.6	3071240	1:3070915-3072074	77.31	50.91	0.60	91.38	54.22	0.63	102.50	42.43	0.71	45.63	65.14	0.41	78.86	45.87	0.63	57.35	59.00	0.49	60.42	75.47	0.44	111.09	28.48	0.80	116.06	25.04	0.82	105.91	29.29	0.78	122.88	33.51	0.79	137.92	0.00	1.00	0.5783333333333333	0.7716666666666666	-0.19333333333333336	0.0014095547330178076	0.00571237576753587	N
AT1G09530|AT1G09530|1|+	1048.3	3079374	1:3078984-3079654	19.47	75.49	0.20	25.16	110.27	0.19	24.53	96.08	0.20	10.23	37.37	0.21	18.43	83.41	0.18	16.01	98.76	0.14	24.56	98.74	0.20	41.37	110.82	0.27	36.04	177.29	0.17	33.45	164.65	0.17	39.22	101.89	0.28	47.36	159.43	0.23	0.18666666666666668	0.22	-0.033333333333333326	0.5330798245325348	0.7160332814787508	N
AT1G09553|AT1G09553|1|-	5853.1	28314499	1:28314311-28314700	NA	NA	NA	NA	NA	NA	15.01	21.96	0.41	NA	NA	NA	NA	NA	NA	NA	NA	NA	0.00	40.99	0.00	7.89	55.23	0.12	6.33	35.20	0.15	2.89	39.23	0.07	3.94	41.25	0.09	7.43	49.71	0.13	0.41	0.09333333333333334	0.31666666666666665	0.0005057486078880493	0.002311694533847077	N
AT1G09560|AT1G09560|1|+	7973.3	3094621	1:3094095-3094954	324.91	277.56	0.54	294.04	260.94	0.53	261.24	387.40	0.40	231.15	424.16	0.35	353.93	365.30	0.49	367.68	463.51	0.44	243.22	242.10	0.50	380.16	0.00	1.00	272.20	72.16	0.79	215.93	68.70	0.76	242.30	0.00	1.00	306.49	0.00	1.00	0.4583333333333334	0.8416666666666667	-0.38333333333333325	5.791152389429385e-29	3.4666675478168556e-27	N
AT1G09570|AT1G09570|1|-	6633.2	3095381	1:3095160-3095699	101.52	297.35	0.25	105.75	320.60	0.25	106.56	334.68	0.24	119.95	202.58	0.37	94.43	312.06	0.23	80.05	283.91	0.22	211.65	421.53	0.33	245.89	442.48	0.36	345.52	341.66	0.50	272.82	428.64	0.39	268.83	323.80	0.45	306.47	381.21	0.45	0.25999999999999995	0.4133333333333334	-0.15333333333333343	2.7787007903737115e-07	2.5542969245091186e-06	N
AT1G09580|AT1G09580|1|+	144.6	3106190	1:3105948-3106366	7.15	32.43	0.18	NA	NA	NA	3.94	30.33	0.12	NA	NA	NA	6.16	41.26	0.13	5.14	38.45	0.12	3.69	31.21	0.11	10.95	58.11	0.16	4.77	48.81	0.09	6.09	58.90	0.09	8.59	71.17	0.11	10.62	67.77	0.14	0.1375	0.11666666666666665	0.020833333333333356	1.0	1.0	N
AT1G09590|AT1G09590|1|+	34327.2	3107595	1:3107349-3107801	281.48	523.40	0.35	293.04	458.95	0.39	258.79	469.99	0.36	255.06	406.31	0.39	225.69	517.90	0.30	237.13	462.84	0.34	613.84	600.57	0.51	753.23	773.74	0.49	590.46	778.93	0.43	528.32	621.91	0.46	761.16	718.98	0.51	642.33	595.36	0.52	0.35500000000000004	0.48666666666666664	-0.1316666666666666	3.6337244148248694e-09	4.5533820315403185e-08	N
AT1G09623|AT1G09623|1|+	821.5	28645803	1:28645595-28645885	137.61	14.93	0.90	126.61	18.93	0.87	225.53	30.72	0.88	232.74	0.00	1.00	157.65	9.75	0.94	142.23	10.47	0.93	190.44	21.97	0.90	154.08	41.90	0.79	148.25	8.13	0.95	152.90	69.84	0.69	132.72	20.21	0.87	169.36	19.28	0.90	0.9199999999999999	0.85	0.06999999999999995	0.015414186386933747	0.0438759009243657	N
AT1G09630|AT1G09630|1|-	318.9	3118379	1:3118155-3118838	26.11	42.77	0.38	46.74	20.17	0.70	24.10	57.54	0.30	27.73	27.75	0.50	19.02	36.61	0.34	55.49	11.04	0.83	43.49	64.17	0.40	74.93	49.85	0.60	61.97	54.04	0.53	38.11	59.04	0.39	70.08	46.51	0.60	70.55	42.23	0.63	0.5083333333333334	0.525	-0.016666666666666607	0.8758390526663535	0.9906901156910136	N
AT1G09640|AT1G09640|1|+	49272.0	3122218	1:3121773-3122542	679.63	524.38	0.56	618.26	561.89	0.52	624.26	623.67	0.50	517.95	549.18	0.49	656.93	581.48	0.53	449.86	639.26	0.41	765.90	387.40	0.66	936.51	282.66	0.77	898.90	327.17	0.73	950.36	160.63	0.86	1043.95	209.51	0.83	1035.62	89.83	0.92	0.5016666666666668	0.795	-0.2933333333333332	4.959540710270084e-50	5.797994827994568e-48	N
AT1G09645|AT1G09645|1|+	1420.5	3124401	1:3124109-3124667	44.37	89.75	0.33	38.26	130.16	0.23	31.50	114.32	0.22	27.09	74.89	0.27	48.40	70.14	0.41	42.70	109.74	0.28	95.96	133.53	0.42	106.85	147.89	0.42	71.28	212.19	0.25	50.70	177.61	0.22	95.37	173.18	0.36	109.77	202.92	0.35	0.29	0.33666666666666667	-0.04666666666666669	0.2586389720879956	0.43093485339342924	N
AT1G09660|AT1G09660|1|-	4830.3	3128007	1:3127762-3128402	119.74	20.63	0.85	99.79	52.60	0.65	110.43	27.22	0.80	70.72	64.30	0.52	108.87	24.58	0.82	87.63	73.41	0.54	159.24	38.49	0.81	223.04	0.00	1.00	210.86	0.00	1.00	157.95	18.04	0.90	179.84	0.00	1.00	201.19	18.78	0.91	0.6966666666666667	0.9366666666666666	-0.24	3.0681591635092086e-09	3.878918270711324e-08	N
AT1G09690|AT1G09690|1|-	195317.9	3136357	1:3136188-3136664	536.34	1292.49	0.29	542.79	1353.04	0.29	479.35	1309.64	0.27	411.03	1191.48	0.26	444.29	1199.80	0.27	372.51	1131.21	0.25	689.32	1862.10	0.27	1231.63	2180.91	0.36	913.95	2153.51	0.30	789.04	1901.97	0.29	1205.16	2287.09	0.35	1132.08	1797.89	0.39	0.27166666666666667	0.32666666666666666	-0.05499999999999999	4.1620117820564365e-05	0.0002458853215118598	N
AT1G09713|AT1G09713|1|+	402.1	28978633	1:28978405-28978724	134.61	0.00	1.00	134.22	0.00	1.00	94.52	24.52	0.79	129.15	34.51	0.79	126.48	50.17	0.72	158.12	26.33	0.86	102.66	22.53	0.82	57.37	21.52	0.73	86.25	63.96	0.57	86.45	36.68	0.70	98.27	56.51	0.63	74.42	36.39	0.67	0.86	0.6866666666666665	0.17333333333333345	0.0007868104786770485	0.00338758047080322	N
AT1G09730|AT1G09730|1|-	1140.3	3147956	1:3147637-3148568	35.54	80.83	0.31	33.12	76.53	0.30	33.10	86.56	0.28	51.57	44.64	0.54	36.36	95.02	0.28	48.43	78.47	0.38	63.13	79.09	0.44	45.77	98.06	0.32	75.52	108.51	0.41	90.70	82.39	0.52	95.67	97.31	0.50	82.50	99.60	0.45	0.3483333333333334	0.44	-0.09166666666666662	0.08477802109722754	0.18097512258714285	N
AT1G09740|AT1G09740|1|+	751.5	3156225	1:3156024-3156376	12.66	91.45	0.12	16.13	90.76	0.15	9.22	108.25	0.08	12.15	84.78	0.13	6.88	96.65	0.07	9.97	142.28	0.07	20.76	109.52	0.16	19.27	116.48	0.14	30.39	65.63	0.32	27.05	97.98	0.22	12.94	80.80	0.14	24.31	118.07	0.17	0.10333333333333335	0.19166666666666668	-0.08833333333333333	0.06339969033660416	0.1433779524066535	N
AT1G09750|AT1G09750|1|+	4510.2	3158887	1:3158664-3159125	534.36	195.72	0.73	531.41	388.04	0.58	543.52	261.83	0.67	385.95	161.84	0.70	423.67	277.45	0.60	463.62	178.13	0.72	720.61	241.59	0.75	782.02	100.24	0.89	662.99	210.53	0.76	658.63	255.58	0.72	653.39	156.18	0.81	701.42	150.36	0.82	0.6666666666666666	0.7916666666666666	-0.125	1.7516665660815268e-08	1.9448391806873892e-07	N
AT1G09760|AT1G09760|1|-	8296.6	3159280	1:3159148-3159481	117.30	182.91	0.39	121.07	151.04	0.44	100.03	217.18	0.32	86.02	89.22	0.49	110.32	187.37	0.37	100.12	192.56	0.34	179.37	169.74	0.51	222.39	178.65	0.55	149.53	244.44	0.38	178.59	205.42	0.47	224.27	208.38	0.52	283.08	166.47	0.63	0.39166666666666666	0.5099999999999999	-0.11833333333333323	0.0007416977743769165	0.0032128381795917256	N
AT1G09770|AT1G09770|1|+	5149.6	3165101	1:3164766-3165370	180.47	401.47	0.31	146.02	389.95	0.27	161.85	368.97	0.30	152.82	374.01	0.29	140.02	388.43	0.26	144.22	280.15	0.34	174.56	370.97	0.32	249.13	317.28	0.44	267.64	239.34	0.53	232.37	312.89	0.43	202.54	428.42	0.32	264.40	382.03	0.41	0.29500000000000004	0.4083333333333334	-0.11333333333333334	0.000184705241703156	0.0009475560076428815	N
AT1G09777|AT1G09777|1|+	2358.7	29351673	1:29351472-29351820	0.00	61.12	0.00	0.00	58.40	0.00	0.00	78.83	0.00	0.00	77.52	0.00	1.13	70.46	0.02	0.62	80.34	0.01	2.83	62.07	0.04	0.00	54.89	0.00	10.21	30.12	0.25	0.00	49.01	0.00	0.00	48.74	0.00	0.00	43.33	0.00	0.005	0.04833333333333333	-0.043333333333333335	0.1687327823691464	0.3085568013253971	N
AT1G09795|AT1G09795|1|+	3310.7	3176796	1:3176595-3176883	104.04	110.99	0.48	123.74	131.96	0.48	90.41	129.95	0.41	53.06	144.43	0.27	85.89	76.87	0.53	67.15	96.88	0.41	78.75	114.45	0.41	249.52	75.54	0.77	145.83	124.85	0.54	152.19	71.44	0.68	157.82	145.45	0.52	251.96	26.90	0.90	0.43	0.6366666666666666	-0.2066666666666666	3.7772968411354995e-06	2.8074045407900868e-05	N
AT1G09810|AT1G09810|1|-	102.5	3181098	1:3180926-3181299	25.46	7.03	0.78	14.95	20.88	0.42	13.72	27.40	0.33	27.51	26.93	0.51	NA	NA	NA	8.08	40.41	0.17	NA	NA	NA	11.31	31.30	0.27	11.83	34.18	0.26	8.81	23.65	0.27	29.42	23.71	0.55	9.56	41.33	0.19	0.442	0.308	0.134	0.3769994947366092	0.5670971812288352	N
AT1G09815|AT1G09815|1|+	597.4	3190078	1:3189857-3190242	127.11	62.57	0.67	144.21	49.10	0.75	132.62	53.97	0.71	72.73	83.61	0.47	139.58	56.35	0.71	148.25	57.61	0.72	151.40	41.09	0.79	210.14	78.55	0.73	156.67	126.45	0.55	194.10	37.81	0.84	262.83	20.44	0.93	251.72	36.06	0.87	0.6716666666666665	0.785	-0.11333333333333351	0.015911375688374554	0.045135980649551224	N
AT1G09823|AT1G09823|1|-	4977.0	29549984	1:29549838-29550185	0.28	73.98	0.00	2.64	68.75	0.04	0.00	108.98	0.00	0.00	75.18	0.00	5.66	111.17	0.05	2.04	114.93	0.02	4.39	55.40	0.07	0.00	33.71	0.00	0.00	44.75	0.00	NA	NA	NA	NA	NA	NA	0.00	40.94	0.00	0.018333333333333333	0.0175	0.0008333333333333318	0.5407900386431959	0.7230665519372225	N
AT1G09830|AT1G09830|1|-	304.4	3192795	1:3192568-3193202	39.49	37.89	0.51	9.84	73.09	0.12	14.86	58.39	0.20	17.24	40.14	0.30	16.17	45.37	0.26	26.46	53.17	0.33	31.23	77.31	0.29	69.73	68.47	0.50	45.50	67.03	0.40	22.72	69.19	0.25	36.34	53.16	0.41	37.17	64.43	0.37	0.2866666666666667	0.36999999999999994	-0.08333333333333326	0.1994423288476534	0.35177533052726917	N
AT1G09840|AT1G09840|1|-	1917.0	3196001	1:3195719-3196202	25.66	97.07	0.21	38.89	114.57	0.25	28.28	107.07	0.21	14.94	114.56	0.12	18.44	126.31	0.13	27.34	154.72	0.15	44.49	71.86	0.38	97.09	112.03	0.46	44.16	106.73	0.29	51.44	138.73	0.27	82.75	74.08	0.53	95.36	45.30	0.68	0.17833333333333332	0.43500000000000005	-0.2566666666666667	1.0843956888972872e-06	8.987189291553248e-06	N
AT1G09870|AT1G09870|1|+	1702.0	3208499	1:3208298-3208712	3.36	100.74	0.03	2.62	71.07	0.04	8.21	79.98	0.09	4.54	64.46	0.07	5.67	107.43	0.05	9.62	110.98	0.08	1.45	93.78	0.02	9.51	114.98	0.08	9.33	104.12	0.08	13.83	105.93	0.12	5.11	126.44	0.04	7.44	117.39	0.06	0.060000000000000005	0.06666666666666667	-0.006666666666666661	1.0	1.0	N
AT1G09910|AT1G09910|1|-	323.8	3220162	1:3220035-3220387	12.00	50.39	0.19	8.50	31.35	0.21	14.76	41.85	0.26	NA	NA	NA	17.52	38.23	0.31	0.00	48.65	0.00	42.59	21.16	0.67	18.92	52.29	0.27	39.20	25.13	0.61	39.58	33.01	0.55	46.27	31.03	0.60	39.74	32.48	0.55	0.194	0.5416666666666666	-0.3476666666666666	0.00014518141594555464	0.0007600989095105251	N
AT1G09920|AT1G09920|1|-	899.1	3224812	1:3224684-3225013	126.10	82.84	0.60	117.67	61.94	0.66	135.63	62.23	0.69	93.38	170.76	0.35	111.07	39.47	0.74	83.47	100.96	0.45	170.11	72.66	0.70	255.73	103.65	0.71	202.56	71.94	0.74	187.15	129.30	0.59	216.23	152.55	0.59	249.15	85.92	0.74	0.5816666666666667	0.6783333333333332	-0.09666666666666657	0.011047693513306964	0.03331742957260434	N
AT1G09940|AT1G09940|1|-	1246.0	3238135	1:3236908-3238336	76.60	1.81	0.98	84.13	0.00	1.00	101.11	0.00	1.00	82.89	0.00	1.00	65.38	24.12	0.73	75.91	0.00	1.00	96.64	0.00	1.00	91.17	7.13	0.93	86.96	0.00	1.00	122.76	0.00	1.00	100.43	0.00	1.00	108.46	0.00	1.00	0.9516666666666667	0.9883333333333333	-0.036666666666666625	0.17868127102950437	0.3225937118859348	N
AT1G09970|AT1G09970|1|+	15919.0	3255519	1:3255052-3255782	140.52	426.26	0.25	166.86	332.75	0.33	166.51	449.31	0.27	199.84	427.59	0.32	144.36	409.28	0.26	171.82	359.56	0.32	155.07	240.97	0.39	132.31	239.29	0.36	124.60	242.73	0.34	175.71	442.88	0.28	95.85	315.21	0.23	228.90	349.67	0.40	0.2916666666666667	0.3333333333333333	-0.04166666666666663	0.15351287265463626	0.2868536878490551	N
AT1G09980|AT1G09980|1|-	748.7	3256474	1:3256189-3256843	33.59	70.83	0.32	37.57	75.52	0.33	23.77	71.06	0.25	13.43	92.80	0.13	20.93	78.25	0.21	13.63	92.84	0.13	31.68	95.63	0.25	31.39	94.57	0.25	54.50	35.71	0.60	57.42	56.23	0.51	59.36	63.19	0.48	68.57	38.80	0.64	0.22833333333333336	0.455	-0.22666666666666666	0.0009220456090627216	0.0039121977870436656	N
AT1G10020|AT1G10020|1|-	5263.8	3269931	1:3269539-3270698	46.38	67.76	0.41	42.00	61.57	0.41	68.87	110.82	0.38	67.35	124.74	0.35	35.96	92.68	0.28	62.93	68.73	0.48	169.97	193.59	0.47	154.40	134.13	0.54	133.74	144.82	0.48	161.96	141.72	0.53	124.95	90.10	0.58	261.87	104.73	0.71	0.38499999999999995	0.5516666666666666	-0.16666666666666669	0.0007117868024058916	0.0031008441277980466	N
AT1G10030|AT1G10030|1|+	643.4	3275765	1:3275564-3275891	6.97	43.04	0.14	5.95	25.96	0.19	3.95	48.21	0.08	0.75	46.66	0.02	2.98	58.82	0.05	7.88	41.66	0.16	31.94	31.75	0.50	33.01	74.17	0.31	11.95	80.02	0.13	20.09	55.98	0.26	8.80	81.75	0.10	31.32	49.78	0.39	0.10666666666666667	0.28166666666666673	-0.17500000000000004	0.013050303083751928	0.03827652353696662	N
AT1G10060|AT1G10060|1|+	1057.7	3286930	1:3286534-3287292	14.98	54.49	0.22	26.23	61.26	0.30	6.54	66.06	0.09	11.06	73.03	0.13	17.43	74.85	0.19	16.81	47.13	0.26	6.67	60.35	0.10	17.67	49.60	0.26	8.28	35.95	0.19	4.34	75.58	0.05	11.73	83.45	0.12	8.37	55.73	0.13	0.19833333333333333	0.1416666666666667	0.05666666666666664	0.3727336221520973	0.5631755561925262	N
AT1G10090|AT1G10090|1|-	875.6	3290588	1:3290471-3290886	54.71	21.72	0.72	51.51	29.33	0.64	86.75	11.67	0.88	83.03	0.00	1.00	84.72	0.00	1.00	82.70	19.33	0.81	114.51	0.00	1.00	136.50	28.94	0.83	131.51	16.42	0.89	142.06	0.00	1.00	92.56	31.50	0.75	121.50	29.48	0.80	0.8416666666666668	0.8783333333333334	-0.036666666666666625	0.5488292545961324	0.7313552773128292	N
AT1G10130|AT1G10130|1|+	333.3	3322140	1:3321877-3322269	6.51	40.23	0.14	NA	NA	NA	8.29	34.76	0.19	32.45	28.43	0.53	NA	NA	NA	1.83	37.18	0.05	15.85	33.64	0.32	41.62	2.28	0.95	30.87	19.42	0.61	32.14	20.69	0.61	21.42	32.21	0.40	36.59	45.28	0.45	0.22750000000000004	0.5566666666666666	-0.3291666666666666	0.004740683314145449	0.016188374602289803	N
AT1G10180|AT1G10180|1|-	297.6	3338404	1:3338185-3338648	31.17	92.78	0.25	18.56	85.66	0.18	21.35	77.74	0.22	17.78	74.04	0.19	14.16	79.67	0.15	26.59	55.22	0.33	29.65	61.02	0.33	27.16	59.57	0.31	32.93	48.16	0.41	17.97	47.74	0.27	28.06	69.02	0.29	13.95	120.81	0.10	0.22	0.28500000000000003	-0.06500000000000003	0.4951331969173149	0.6823101619424987	N
AT1G10200|AT1G10200|1|-	15975.1	3346586	1:3346383-3346883	63.33	485.32	0.12	70.62	436.35	0.14	78.13	610.84	0.11	58.03	417.44	0.12	71.51	494.88	0.13	81.59	475.19	0.15	113.17	665.84	0.15	109.96	665.51	0.14	81.27	592.08	0.12	121.05	734.15	0.14	119.21	691.47	0.15	148.46	753.61	0.16	0.12833333333333333	0.14333333333333334	-0.015000000000000013	0.3764174294634135	0.5668919935691521	N
AT1G10290|AT1G10290|1|+	1969.2	3377080	1:3376879-3377463	122.02	151.42	0.45	116.01	77.75	0.60	123.75	125.51	0.50	91.05	140.26	0.39	131.26	105.28	0.55	142.05	89.83	0.61	168.37	161.42	0.51	244.58	53.76	0.82	188.37	88.08	0.68	209.30	137.81	0.60	303.16	0.00	1.00	212.59	123.54	0.63	0.5166666666666667	0.7066666666666667	-0.18999999999999995	8.511377883167317e-06	5.893906761326386e-05	N
AT1G10310|AT1G10310|1|-	2539.8	3381601	1:3381447-3381802	4.45	73.12	0.06	12.75	63.67	0.17	4.35	57.84	0.07	3.58	55.33	0.06	0.00	57.40	0.00	1.05	76.16	0.01	9.28	120.46	0.07	4.99	128.68	0.04	6.33	116.68	0.05	8.70	116.59	0.07	23.59	142.95	0.14	8.19	122.66	0.06	0.061666666666666675	0.07166666666666667	-0.009999999999999995	0.7778391450424063	0.9242362291386333	N
AT1G10350|AT1G10350|1|-	341.1	3393465	1:3392943-3394033	10.96	52.86	0.17	7.08	70.68	0.09	8.03	60.79	0.12	5.68	45.19	0.11	4.36	68.34	0.06	5.14	58.96	0.08	12.42	52.36	0.19	15.60	85.85	0.15	34.43	45.49	0.43	6.15	75.62	0.08	34.60	64.55	0.35	25.42	62.30	0.29	0.105	0.24833333333333332	-0.1433333333333333	0.017886528441664475	0.04977273400302993	N
AT1G10360|AT1G10360|1|-	5640.7	3395752	1:3395551-3396100	275.20	139.85	0.66	323.85	129.28	0.71	247.09	171.18	0.59	252.38	135.28	0.65	215.11	217.85	0.50	224.97	213.33	0.51	370.72	108.30	0.77	482.56	51.51	0.90	305.70	164.28	0.65	380.62	74.94	0.84	510.75	63.48	0.89	313.62	170.42	0.65	0.6033333333333334	0.7833333333333333	-0.17999999999999994	1.442923390582844e-09	1.909231655422333e-08	N
AT1G10370|AT1G10370|1|-	10801.9	3397198	1:3396883-3397636	62.26	457.55	0.12	86.38	468.24	0.16	60.07	275.76	0.18	119.09	560.84	0.18	75.96	552.08	0.12	69.01	484.78	0.12	85.98	479.70	0.15	173.24	612.64	0.22	75.84	533.23	0.12	78.51	394.56	0.17	129.80	566.59	0.19	117.99	454.83	0.21	0.14666666666666667	0.17666666666666667	-0.03	0.11070720731126271	0.22145868453460926	N
AT1G10380|AT1G10380|1|+	425.1	3401837	1:3401481-3402420	21.18	58.59	0.27	22.33	63.63	0.26	17.61	58.66	0.23	24.60	41.57	0.37	26.90	79.40	0.25	17.60	82.37	0.18	21.29	83.66	0.20	25.25	48.60	0.34	14.85	65.02	0.19	28.74	21.58	0.57	23.91	57.54	0.29	29.05	17.51	0.62	0.25999999999999995	0.36833333333333335	-0.10833333333333339	0.371868692375977	0.5621876154176302	N
AT1G10390|AT1G10390|1|-	6821.5	3407743	1:3406956-3407944	332.41	0.00	1.00	322.30	0.00	1.00	342.23	0.00	1.00	325.33	15.62	0.95	288.78	0.00	1.00	296.15	0.00	1.00	349.23	0.00	1.00	321.56	0.00	1.00	390.28	0.00	1.00	343.08	0.00	1.00	366.18	0.00	1.00	316.72	0.00	1.00	0.9916666666666667	1.0	-0.008333333333333304	0.22904558694043112	0.39194523806217735	N
AT1G10410|AT1G10410|1|-	1568.0	3416742	1:3416430-3416943	5.79	167.18	0.03	8.27	145.79	0.05	7.32	146.61	0.05	3.97	151.02	0.03	7.34	153.01	0.05	7.59	142.53	0.05	2.04	113.68	0.02	3.49	130.00	0.03	3.96	177.12	0.02	12.53	198.00	0.06	3.80	199.51	0.02	3.63	165.07	0.02	0.043333333333333335	0.028333333333333332	0.015000000000000003	0.5317513461217578	0.715021940821916	N
AT1G10430|AT1G10430|1|-	1841.5	3428677	1:3428478-3428878	31.20	40.36	0.44	62.45	15.82	0.80	45.73	49.28	0.48	35.12	43.09	0.45	28.85	43.82	0.40	39.03	19.64	0.67	119.65	0.00	1.00	155.42	0.00	1.00	36.56	113.78	0.24	105.18	30.60	0.77	108.81	47.09	0.70	87.70	44.59	0.66	0.5399999999999999	0.7283333333333334	-0.18833333333333346	0.006637408488446732	0.021660403333233227	N
AT1G10450|AT1G10450|1|+	1301.9	3438220	1:3437833-3438370	49.36	15.10	0.77	53.47	5.07	0.91	31.42	33.96	0.48	33.32	30.44	0.52	28.08	37.76	0.43	31.60	14.59	0.68	56.68	12.53	0.82	65.87	8.82	0.88	43.98	21.26	0.67	119.28	0.00	1.00	95.94	0.00	1.00	82.20	0.00	1.00	0.6316666666666667	0.895	-0.2633333333333333	3.5578779495258065e-05	0.00021323662958044597	N
AT1G10470|AT1G10470|1|-	7621.6	3442519	1:3441988-3442999	14.96	227.80	0.06	16.91	240.55	0.07	11.58	247.49	0.04	17.07	338.18	0.05	14.71	299.34	0.05	7.83	294.76	0.03	20.96	409.03	0.05	49.38	600.33	0.08	42.60	626.55	0.06	23.99	571.26	0.04	28.54	558.51	0.05	23.80	597.34	0.04	0.05000000000000001	0.05333333333333334	-0.003333333333333327	0.742739254767857	0.895703880416043	N
AT1G10490|AT1G10490|1|+	438.8	3459887	1:3459686-3460000	55.87	40.48	0.58	35.02	50.69	0.41	53.66	39.72	0.57	54.57	40.91	0.57	49.01	33.53	0.59	72.24	7.82	0.90	60.38	59.25	0.50	108.52	36.96	0.75	31.34	67.90	0.32	65.41	40.83	0.62	102.62	43.28	0.70	118.39	33.48	0.78	0.6033333333333333	0.6116666666666667	-0.008333333333333415	0.6680318321512386	0.8374700064979249	N
AT1G10522|AT1G10522|1|+	1022.8	3471304	1:3471103-3471456	119.19	93.91	0.56	163.08	68.43	0.70	111.95	61.05	0.65	96.37	109.30	0.47	123.12	52.42	0.70	103.58	121.32	0.46	170.72	76.22	0.69	295.32	38.02	0.89	230.88	92.34	0.71	208.12	56.59	0.79	284.33	46.26	0.86	194.75	119.60	0.62	0.59	0.7599999999999999	-0.16999999999999993	3.2795075909861134e-05	0.00019774555176959351	N
AT1G10580|AT1G10580|1|-	589.7	3491365	1:3491277-3491566	43.90	59.74	0.42	26.21	68.36	0.28	25.14	61.06	0.29	37.17	66.30	0.36	28.16	79.14	0.26	20.27	58.64	0.26	85.30	40.86	0.68	83.95	105.30	0.44	72.27	114.52	0.39	66.07	69.10	0.49	107.51	88.39	0.55	106.01	69.24	0.60	0.3116666666666667	0.525	-0.21333333333333332	0.0019373775182174157	0.007467696042872948	N
AT1G10590|AT1G10590|1|-	19263.3	3502210	1:3501988-3502514	220.99	408.25	0.35	190.76	423.70	0.31	180.64	538.55	0.25	227.45	417.51	0.35	189.77	508.93	0.27	163.87	515.63	0.24	353.73	591.88	0.37	491.53	920.67	0.35	353.48	841.29	0.30	390.81	566.32	0.41	479.83	881.31	0.35	391.27	899.81	0.30	0.295	0.3466666666666666	-0.05166666666666664	0.03004555880026572	0.07712805936405075	N
AT1G10610|AT1G10610|1|+	944.2	3508882	1:3508681-3509001	13.90	62.81	0.18	7.88	63.23	0.11	9.98	65.92	0.13	9.69	41.04	0.19	18.56	51.47	0.27	14.33	58.98	0.20	9.84	54.91	0.15	22.31	50.49	0.31	5.32	44.44	0.11	15.16	43.84	0.26	18.56	55.52	0.25	6.25	40.53	0.13	0.18000000000000002	0.20166666666666666	-0.02166666666666664	0.8213458397008765	0.958293223307486	N
AT1G10630|AT1G10630|1|-	32326.4	3512993	1:3512739-3513194	10.22	287.92	0.03	7.16	258.78	0.03	9.09	316.27	0.03	9.20	245.74	0.04	9.21	276.26	0.03	13.56	289.79	0.04	8.51	476.97	0.02	6.67	635.33	0.01	8.95	625.09	0.01	5.69	635.31	0.01	6.80	634.06	0.01	7.29	700.25	0.01	0.03333333333333333	0.011666666666666667	0.021666666666666667	0.05297985032835853	0.12416527658323083	N
AT1G10640|AT1G10640|1|-	989.6	3515547	1:3515346-3516061	80.68	92.15	0.47	119.78	52.68	0.69	73.62	35.24	0.68	93.62	30.97	0.75	84.44	77.46	0.52	58.00	61.80	0.48	74.57	35.15	0.68	104.24	35.95	0.74	83.66	3.34	0.96	76.45	3.05	0.96	103.49	50.41	0.67	99.48	0.00	1.00	0.5983333333333333	0.835	-0.2366666666666667	0.00021932762447836372	0.0011007366689098487	N
AT1G10650|AT1G10650|1|-	552.9	3524311	1:3523986-3524661	75.60	55.82	0.58	66.99	65.85	0.50	67.26	43.58	0.61	50.21	72.86	0.41	78.72	49.11	0.62	67.80	53.45	0.56	66.24	47.97	0.58	90.73	40.35	0.69	77.13	73.57	0.51	37.62	50.77	0.43	74.88	33.14	0.69	108.08	0.00	1.00	0.5466666666666667	0.65	-0.10333333333333328	0.11257527776819948	0.22440532300553626	N
AT1G10657|AT1G10657|1|+	1373.3	3531697	1:3531193-3532017	18.38	43.01	0.30	20.47	62.74	0.25	23.20	48.77	0.32	5.68	36.52	0.13	23.07	37.13	0.38	21.56	68.71	0.24	11.77	29.08	0.29	7.95	24.50	0.24	12.35	23.19	0.35	19.43	28.85	0.40	41.26	11.89	0.78	4.20	41.57	0.09	0.26999999999999996	0.35833333333333334	-0.08833333333333337	0.2883397127791629	0.46640327501961665	N
AT1G10660|AT1G10660|1|+	1007.7	3534979	1:3534682-3535137	133.46	91.93	0.59	97.76	96.45	0.50	152.06	44.62	0.77	83.91	133.31	0.39	113.16	76.59	0.60	138.93	93.15	0.60	180.69	50.29	0.78	218.32	40.85	0.84	190.59	61.85	0.76	198.80	54.35	0.79	203.57	57.56	0.78	224.34	15.63	0.93	0.5750000000000001	0.8133333333333334	-0.23833333333333329	2.0037714089560213e-08	2.2001631481542523e-07	N
AT1G10700|AT1G10700|1|+	386.0	3556358	1:3556141-3556544	27.83	60.83	0.31	28.57	57.29	0.33	31.56	79.29	0.28	19.35	27.33	0.41	26.69	17.75	0.60	51.33	33.46	0.61	44.50	70.41	0.39	90.18	28.16	0.76	32.39	86.94	0.27	48.76	89.63	0.35	88.38	62.49	0.59	91.09	136.62	0.40	0.42333333333333334	0.45999999999999996	-0.036666666666666625	0.47691909524575576	0.6649506740236037	N
AT1G10720|AT1G10720|1|+	1154.9	3564162	1:3563961-3564850	105.40	0.00	1.00	93.28	0.00	1.00	117.28	2.09	0.98	114.36	12.52	0.90	99.15	0.00	1.00	122.26	0.00	1.00	132.54	0.00	1.00	122.58	0.00	1.00	156.83	0.00	1.00	134.69	0.00	1.00	131.22	0.00	1.00	134.92	0.00	1.00	0.98	1.0	-0.020000000000000018	0.2005687520909895	0.3530649582866542	N
AT1G10760|AT1G10760|1|-	8548.9	3581146	1:3580830-3581414	50.20	386.72	0.11	47.77	380.97	0.11	44.31	376.60	0.11	53.87	384.91	0.12	39.76	397.03	0.09	41.20	372.97	0.10	45.10	373.24	0.11	81.44	562.34	0.13	54.25	515.21	0.10	52.92	579.21	0.08	92.56	648.52	0.12	71.83	534.19	0.12	0.10666666666666667	0.11	-0.003333333333333327	0.9194721711425301	1.0	N
AT1G10820|AT1G10820|1|-	910.7	3601106	1:3600910-3601493	82.49	33.57	0.71	60.57	74.52	0.45	70.22	44.98	0.61	49.85	51.85	0.49	64.16	57.04	0.53	67.83	53.64	0.56	74.55	49.35	0.60	81.80	56.75	0.59	129.17	0.00	1.00	119.84	49.03	0.71	84.24	71.06	0.54	95.74	39.27	0.71	0.5583333333333333	0.6916666666666668	-0.13333333333333341	0.03821236869404365	0.09438635538471583	N
AT1G10830|AT1G10830|1|-	5242.8	3606500	1:3605512-3606961	49.12	12.01	0.80	55.62	33.33	0.63	44.99	23.82	0.65	41.46	44.94	0.48	49.66	20.29	0.71	47.64	40.55	0.54	75.96	65.11	0.54	85.53	29.00	0.75	69.53	44.93	0.61	91.65	6.01	0.94	78.20	20.19	0.79	72.30	10.75	0.87	0.635	0.75	-0.11499999999999999	0.14885949307859603	0.2805795134690928	N
AT1G10840|AT1G10840|1|-	21630.8	3607741	1:3607631-3607942	32.04	200.20	0.14	32.03	224.54	0.12	38.84	231.56	0.14	15.34	193.20	0.07	27.52	184.32	0.13	20.08	203.28	0.09	46.09	260.29	0.15	42.53	382.59	0.10	36.72	318.92	0.10	59.30	310.27	0.16	54.32	408.87	0.12	54.88	441.74	0.11	0.115	0.12333333333333334	-0.008333333333333331	1.0	1.0	N
AT1G10850|AT1G10850|1|+	987.5	3613883	1:3613682-3614513	104.42	0.00	1.00	81.34	3.16	0.96	112.20	0.00	1.00	107.29	0.00	1.00	93.80	0.00	1.00	71.02	0.00	1.00	97.94	0.00	1.00	79.85	0.00	1.00	112.88	0.00	1.00	81.69	0.00	1.00	101.56	0.00	1.00	120.06	0.00	1.00	0.9933333333333333	1.0	-0.00666666666666671	1.0	1.0	N
AT1G10870|AT1G10870|1|-	545.4	3616815	1:3616610-3617019	44.10	51.69	0.46	26.06	73.35	0.26	43.33	56.42	0.43	46.25	64.96	0.42	39.93	89.96	0.31	43.41	39.74	0.52	35.78	82.13	0.30	62.19	59.68	0.51	22.98	111.82	0.17	37.72	59.61	0.39	62.39	47.04	0.57	98.50	28.38	0.78	0.39999999999999997	0.4533333333333333	-0.053333333333333344	0.4116701203532349	0.6026853335328618	N
AT1G10890|AT1G10890|1|+	6710.9	3630540	1:3630255-3630808	132.96	193.25	0.41	101.00	219.38	0.32	145.90	188.80	0.44	130.10	167.21	0.44	126.81	229.42	0.36	171.30	196.75	0.47	151.15	224.21	0.40	192.16	246.89	0.44	209.44	174.31	0.55	137.38	333.28	0.29	207.79	296.03	0.41	169.56	438.71	0.28	0.40666666666666657	0.395	0.011666666666666548	0.6064504190278871	0.7827989585630885	N
AT1G10900|AT1G10900|1|-	2547.4	3632334	1:3632132-3632675	24.73	163.15	0.13	39.45	163.44	0.19	13.13	161.23	0.08	18.56	223.31	0.08	20.11	156.03	0.11	18.73	162.54	0.10	23.95	183.66	0.12	50.40	269.31	0.16	22.09	233.29	0.09	58.24	171.97	0.25	68.48	253.67	0.21	42.00	217.85	0.16	0.115	0.165	-0.05	0.13845375874069643	0.26488544486066623	N
AT1G10910|AT1G10910|1|+	2879.0	3643942	1:3643454-3644180	27.95	86.70	0.24	29.71	101.01	0.23	23.21	87.51	0.21	25.43	78.92	0.24	20.07	104.98	0.16	24.41	127.72	0.16	41.07	90.88	0.31	46.61	77.91	0.37	36.09	84.04	0.30	37.27	40.20	0.48	88.81	34.28	0.72	52.90	80.71	0.40	0.20666666666666664	0.42999999999999994	-0.2233333333333333	0.00028761309779237596	0.0014085812482813405	N
AT1G10930|AT1G10930|1|-	228.5	3648057	1:3647876-3648371	19.22	27.07	0.42	27.24	18.47	0.60	27.06	17.22	0.61	26.04	10.33	0.72	9.52	29.43	0.24	22.20	26.02	0.46	44.66	19.04	0.70	30.29	33.46	0.48	53.80	23.06	0.70	44.00	14.07	0.76	43.06	52.83	0.45	55.39	15.59	0.78	0.5083333333333333	0.645	-0.13666666666666671	0.17350584286969162	0.31565865261737924	N
AT1G10940|AT1G10940|1|-	7953.6	3655936	1:3655673-3656400	64.69	212.83	0.23	49.32	250.81	0.16	43.84	259.25	0.14	55.69	242.86	0.19	37.55	231.14	0.14	37.67	302.49	0.11	126.00	322.81	0.28	140.77	362.67	0.28	109.44	322.23	0.25	147.68	360.97	0.29	148.38	382.98	0.28	137.93	317.99	0.30	0.16166666666666665	0.28	-0.11833333333333337	0.00012236459812050118	0.0006544332677736385	N
AT1G10950|AT1G10950|1|+	13613.7	3663756	1:3663555-3664264	19.95	256.48	0.07	19.48	205.71	0.09	18.15	233.54	0.07	14.53	178.01	0.08	19.64	180.62	0.10	14.31	223.00	0.06	24.93	225.62	0.10	32.43	345.90	0.09	34.09	291.94	0.10	31.02	337.40	0.08	34.07	421.21	0.07	32.63	345.99	0.09	0.07833333333333334	0.08833333333333333	-0.009999999999999995	0.645864872267604	0.8179298120224097	N
AT1G11020|AT1G11020|1|+	401.6	3678325	1:3677971-3678567	49.78	45.53	0.52	35.31	44.29	0.44	41.46	56.69	0.42	57.93	19.61	0.75	50.73	9.57	0.84	55.60	49.91	0.53	59.03	39.70	0.60	114.05	3.85	0.97	93.51	68.04	0.58	41.99	62.39	0.40	102.12	9.09	0.92	67.14	47.84	0.58	0.5833333333333334	0.6749999999999999	-0.09166666666666656	0.14002287043038175	0.26740129039313426	N
AT1G11130|AT1G11130|1|+	341.9	3727320	1:3727116-3727450	17.39	56.06	0.24	16.52	60.78	0.21	19.45	43.11	0.31	18.32	20.12	0.48	27.22	30.46	0.47	24.79	54.60	0.31	45.17	36.93	0.55	74.48	18.86	0.80	62.63	19.72	0.76	63.62	12.83	0.83	50.19	64.24	0.44	59.59	66.70	0.47	0.33666666666666667	0.6416666666666667	-0.30500000000000005	0.00018285614916516897	0.0009390395629221106	N
AT1G11180|AT1G11180|1|+	729.1	3748422	1:3748221-3748557	17.24	52.38	0.25	18.23	54.66	0.25	17.61	42.81	0.29	22.57	51.48	0.30	15.08	38.28	0.28	17.60	53.12	0.25	17.67	52.28	0.25	20.54	91.04	0.18	35.89	51.19	0.41	19.82	86.23	0.19	6.95	76.83	0.08	21.28	60.69	0.26	0.27	0.22833333333333336	0.04166666666666666	0.5720460610653116	0.7518081879124457	N
AT1G11200|AT1G11200|1|+	470.3	3755471	1:3755253-3755658	30.88	79.70	0.28	63.71	48.86	0.57	40.55	49.38	0.45	31.32	44.62	0.41	46.13	11.75	0.80	26.39	64.54	0.29	33.55	57.15	0.37	86.83	41.98	0.67	49.56	39.04	0.56	40.23	60.78	0.40	75.87	30.49	0.71	63.40	55.11	0.53	0.4666666666666666	0.54	-0.07333333333333342	0.14944679803836797	0.2814199037535081	N
AT1G11240|AT1G11240|1|-	1103.6	3766991	1:3766754-3767192	120.24	36.15	0.77	87.82	69.60	0.56	109.66	76.45	0.59	80.73	88.39	0.48	98.90	63.51	0.61	122.13	45.16	0.73	173.78	35.96	0.83	203.00	92.56	0.69	214.84	0.00	1.00	138.73	70.53	0.66	263.32	28.97	0.90	266.85	43.38	0.86	0.6233333333333333	0.8233333333333334	-0.20000000000000007	4.352903388510227e-06	3.182840395263144e-05	N
AT1G11260|AT1G11260|1|+	320104.4	3780169	1:3779651-3780386	344.36	347.77	0.50	381.38	583.11	0.40	521.61	979.75	0.35	311.69	483.18	0.39	292.22	510.26	0.36	226.44	450.74	0.33	1970.77	1844.24	0.52	2707.13	1196.67	0.69	2238.67	1844.99	0.55	4153.21	1809.27	0.70	2431.11	905.82	0.73	4293.31	1864.84	0.70	0.38833333333333336	0.6483333333333333	-0.25999999999999995	4.47449040775699e-51	5.557876397735152e-49	N
AT1G11280|AT1G11280|1|-	678.6	3787553	1:3787318-3787755	69.71	55.04	0.56	68.03	49.28	0.58	45.36	72.65	0.38	26.13	80.00	0.25	70.45	66.08	0.52	73.05	37.96	0.66	100.66	49.08	0.67	149.35	24.97	0.86	122.45	49.29	0.71	123.72	59.69	0.67	153.00	22.74	0.87	139.72	16.89	0.89	0.4916666666666667	0.7783333333333333	-0.2866666666666666	5.871870960032149e-07	5.12280787794903e-06	N
AT1G11310|AT1G11310|1|-	9057.6	3801026	1:3800851-3801306	382.62	156.45	0.71	361.58	160.90	0.69	447.54	266.19	0.63	342.92	234.23	0.59	338.93	169.13	0.67	437.05	344.75	0.56	496.61	253.95	0.66	741.57	0.00	1.00	546.93	221.20	0.71	572.15	232.64	0.71	552.02	100.65	0.85	728.41	0.00	1.00	0.6416666666666666	0.8216666666666667	-0.18000000000000005	3.5421869438318874e-14	8.091657853070682e-13	N
AT1G11350|AT1G11350|1|-	596.2	3817707	1:3817424-3818033	24.83	49.95	0.33	16.33	49.04	0.25	32.41	86.79	0.27	38.34	30.86	0.55	25.37	47.17	0.35	26.32	60.62	0.30	39.07	63.04	0.38	50.35	106.96	0.32	52.96	58.45	0.48	40.32	124.40	0.24	66.57	32.08	0.67	79.41	59.91	0.57	0.3416666666666666	0.4433333333333333	-0.10166666666666668	0.24393742697574183	0.41232978109491425	N
AT1G11360|AT1G11360|1|-	2806.1	3821554	1:3821106-3821795	4.32	105.94	0.04	8.86	110.91	0.07	8.54	131.72	0.06	8.05	93.87	0.08	8.57	120.35	0.07	6.63	115.04	0.05	17.93	142.19	0.11	16.54	182.35	0.08	17.20	167.32	0.09	16.61	167.67	0.09	15.73	211.95	0.07	11.56	187.75	0.06	0.06166666666666667	0.08333333333333333	-0.02166666666666666	0.6507022445180943	0.8222188287377128	N
AT1G11380|AT1G11380|1|+	597.6	3834180	1:3833766-3834432	4.19	39.79	0.10	9.10	49.07	0.16	6.42	64.06	0.09	4.78	44.08	0.10	4.92	45.34	0.10	6.57	41.42	0.14	28.03	155.17	0.15	30.50	128.50	0.19	7.66	125.74	0.06	26.16	148.43	0.15	9.80	108.53	0.08	66.15	129.50	0.34	0.11499999999999999	0.16166666666666665	-0.04666666666666666	0.1946890147690632	0.34485458193281193	N
AT1G11390|AT1G11390|1|-	202.8	3834680	1:3834462-3834881	NA	NA	NA	49.78	1.44	0.97	46.00	7.97	0.85	20.75	30.58	0.40	23.40	25.60	0.48	52.16	0.00	1.00	61.65	0.00	1.00	39.22	25.00	0.61	38.37	14.33	0.73	43.21	16.99	0.72	54.05	7.30	0.88	65.70	0.00	1.00	0.74	0.8233333333333333	-0.08333333333333326	0.34764472545160907	0.5342631668438972	N
AT1G11410|AT1G11410|1|+	679.4	3844229	1:3843958-3844461	77.93	80.06	0.49	74.04	58.07	0.56	65.51	91.87	0.42	77.76	48.69	0.61	37.86	101.20	0.27	54.36	103.02	0.35	108.33	71.51	0.60	128.72	38.54	0.77	103.18	44.57	0.70	94.91	72.18	0.57	110.89	58.72	0.65	107.81	34.74	0.76	0.45	0.6749999999999999	-0.22499999999999992	8.184518641081852e-05	0.0004530894804257959	N
AT1G11430|AT1G11430|1|+	21335.9	3849018	1:3848766-3849224	119.16	354.52	0.25	131.14	389.47	0.25	84.98	322.14	0.21	108.87	334.14	0.25	108.72	368.23	0.23	107.06	378.62	0.22	210.22	550.64	0.28	344.68	672.86	0.34	282.79	709.08	0.29	213.11	696.36	0.23	324.45	696.37	0.32	279.63	692.19	0.29	0.235	0.2916666666666667	-0.0566666666666667	0.02594396265277337	0.06825659435546969	N
AT1G11480|AT1G11480|1|-	2605.8	3864445	1:3864074-3864827	138.84	116.13	0.54	130.35	86.12	0.60	154.88	117.54	0.57	137.89	156.60	0.47	135.78	129.66	0.51	121.94	147.58	0.45	170.37	105.86	0.62	220.30	62.89	0.78	226.87	39.34	0.85	243.14	17.00	0.93	229.66	17.67	0.93	273.80	20.14	0.93	0.5233333333333333	0.84	-0.31666666666666665	1.601350065337799e-15	4.143910312307737e-14	N
AT1G11530|AT1G11530|1|+	20768.4	3875357	1:3875156-3875442	73.59	203.53	0.27	97.38	199.68	0.33	86.72	239.99	0.27	59.10	165.79	0.26	62.76	190.61	0.25	52.94	236.62	0.18	91.82	340.75	0.21	169.79	370.19	0.31	161.58	334.79	0.33	64.85	423.13	0.13	163.25	508.47	0.24	186.22	395.17	0.32	0.26	0.2566666666666667	0.0033333333333332993	1.0	1.0	N
AT1G11545|AT1G11545|1|-	458.8	3878744	1:3878495-3879097	35.38	44.80	0.44	23.87	20.41	0.54	19.26	91.02	0.17	18.36	45.08	0.29	24.17	59.30	0.29	33.32	43.68	0.43	36.48	80.96	0.31	35.26	40.67	0.46	47.11	60.88	0.44	37.73	59.88	0.39	44.57	42.18	0.51	49.40	63.23	0.44	0.36000000000000004	0.42500000000000004	-0.065	0.2726644760794186	0.4473576458956608	N
AT1G11580|AT1G11580|1|+	1640.4	3890200	1:3889958-3890824	257.11	29.57	0.90	218.86	54.69	0.80	241.32	29.19	0.89	216.10	92.30	0.70	203.07	46.85	0.81	274.79	46.36	0.86	188.76	63.25	0.75	225.01	0.00	1.00	213.64	0.00	1.00	291.74	0.00	1.00	313.08	0.00	1.00	210.30	0.00	1.00	0.8266666666666667	0.9583333333333334	-0.1316666666666667	6.519576691399134e-07	5.6531442916608364e-06	N
AT1G11592|AT1G11592|1|-	269.5	3895337	1:3895179-3895538	11.71	44.28	0.21	14.37	45.62	0.24	7.72	39.63	0.16	11.17	21.40	0.34	18.39	50.84	0.27	20.68	46.52	0.31	9.46	54.95	0.15	16.30	22.94	0.42	28.42	39.78	0.42	13.13	26.40	0.33	16.72	55.79	0.23	43.31	45.52	0.49	0.255	0.34	-0.08500000000000002	0.31789309752984957	0.5019110359531179	N
AT1G11650|AT1G11650|1|+	70812.2	3918036	1:3917738-3918243	293.54	907.20	0.24	290.80	852.71	0.25	265.32	968.14	0.22	241.81	819.42	0.23	256.55	918.02	0.22	230.14	927.44	0.20	325.54	994.83	0.25	493.64	991.96	0.33	401.44	1049.31	0.28	377.26	1040.63	0.27	456.45	1025.03	0.31	449.44	1181.36	0.28	0.22666666666666666	0.2866666666666667	-0.060000000000000026	0.0007629584156557468	0.0032948795203699074	N
AT1G11660|AT1G11660|1|+	1099.7	3924449	1:3924248-3924566	23.02	59.84	0.28	20.23	45.48	0.31	10.40	69.18	0.13	3.77	86.56	0.04	3.59	59.43	0.06	18.26	70.63	0.21	12.71	58.46	0.18	14.97	85.29	0.15	11.70	66.94	0.15	19.88	51.66	0.28	11.98	83.36	0.13	9.05	105.13	0.08	0.17166666666666666	0.16166666666666665	0.010000000000000009	0.8315572390536934	0.9647617378256336	N
AT1G11670|AT1G11670|1|-	272.6	3928308	1:3928115-3928582	14.65	26.31	0.36	19.49	33.49	0.37	6.93	28.03	0.20	9.48	20.67	0.31	8.49	40.80	0.17	31.79	17.20	0.65	15.22	31.51	0.33	28.75	59.15	0.33	27.06	8.08	0.77	26.50	41.45	0.39	40.05	31.82	0.56	48.04	9.98	0.83	0.3433333333333333	0.535	-0.1916666666666667	0.16340207176245178	0.30132410021484035	N
AT1G11680|AT1G11680|1|+	9673.4	3939794	1:3939593-3940871	374.21	0.00	1.00	340.97	0.71	1.00	380.05	34.50	0.92	335.76	47.06	0.88	352.44	0.00	1.00	319.37	90.21	0.78	452.11	0.00	1.00	386.95	0.00	1.00	426.59	0.00	1.00	314.45	0.00	1.00	376.13	0.00	1.00	387.37	0.00	1.00	0.93	1.0	-0.06999999999999995	1.4150822509632352e-09	1.8748896437095558e-08	N
AT1G11720|AT1G11720|1|+	828.8	3956935	1:3956711-3957044	73.20	60.12	0.55	65.51	80.33	0.45	53.38	75.74	0.41	87.86	58.01	0.60	52.69	83.46	0.39	50.71	89.96	0.36	109.94	61.20	0.64	117.51	131.97	0.47	94.37	151.47	0.38	142.67	122.69	0.54	134.63	145.76	0.48	116.95	133.89	0.47	0.45999999999999996	0.4966666666666666	-0.036666666666666625	0.5942383386068472	0.7724942923516798	N
AT1G11760|AT1G11760|1|-	260.1	3972223	1:3971986-3972833	33.13	33.37	0.50	21.15	36.44	0.37	31.96	30.95	0.51	18.47	35.92	0.34	30.14	41.00	0.42	20.71	49.78	0.29	32.40	33.76	0.49	27.61	35.68	0.44	25.08	68.12	0.27	41.99	20.72	0.67	33.55	50.60	0.40	34.29	24.18	0.59	0.405	0.4766666666666666	-0.0716666666666666	0.598811562983453	0.7759017474724961	N
AT1G11780|AT1G11780|1|-	111.9	3977522	1:3977379-3977753	41.49	29.04	0.59	39.68	20.26	0.66	50.97	13.08	0.80	36.09	9.28	0.80	45.16	21.99	0.67	54.08	19.74	0.73	38.38	22.64	0.63	77.18	0.00	1.00	23.76	11.52	0.67	36.42	5.84	0.86	31.35	21.86	0.59	22.72	51.98	0.30	0.7083333333333334	0.6749999999999999	0.03333333333333344	0.841595931819937	0.9717139870704237	N
AT1G11840|AT1G11840|1|+	49002.4	3997720	1:3997477-3997965	60.59	1029.90	0.06	67.92	914.82	0.07	61.60	798.67	0.07	51.71	794.21	0.06	65.94	898.89	0.07	68.08	1121.57	0.06	126.63	1346.62	0.09	202.99	1585.89	0.11	203.61	1726.46	0.11	161.04	1523.54	0.10	185.59	1856.81	0.09	149.07	1538.24	0.09	0.065	0.09833333333333333	-0.033333333333333326	0.002088582214746902	0.007991621666515196	N
AT1G11850|AT1G11850|1|+	5509.6	3999750	1:3999157-4000024	37.78	79.50	0.32	30.50	139.71	0.18	22.56	100.31	0.18	20.01	78.43	0.20	12.32	107.47	0.10	15.04	80.76	0.16	33.08	82.83	0.29	19.83	99.26	0.17	19.75	71.26	0.22	16.42	87.17	0.16	29.14	63.70	0.31	16.53	86.10	0.16	0.18999999999999997	0.2183333333333333	-0.02833333333333332	0.7391091057165136	0.8937078424926582	N
AT1G11860|AT1G11860|1|+	484973.1	4003321	1:4002699-4003748	318.97	3794.07	0.08	343.85	3718.66	0.08	267.31	3345.25	0.07	277.94	3826.45	0.07	281.89	3730.04	0.07	242.97	3699.67	0.06	300.73	4328.68	0.06	484.07	4760.87	0.09	312.72	4913.38	0.06	329.59	4140.47	0.07	466.61	4538.70	0.09	439.05	4009.17	0.10	0.07166666666666667	0.07833333333333332	-0.006666666666666654	0.18439263635078118	0.3304435757290735	N
AT1G11870|AT1G11870|1|+	2805.2	4006632	1:4006097-4006868	42.57	56.10	0.43	46.35	58.62	0.44	28.62	65.79	0.30	15.42	76.03	0.17	34.43	68.03	0.34	6.51	82.79	0.07	63.68	80.45	0.44	57.42	79.45	0.42	43.67	103.77	0.30	35.61	76.17	0.32	69.82	57.37	0.55	53.02	76.65	0.41	0.2916666666666667	0.40666666666666673	-0.11500000000000005	0.09408386461260827	0.19538377484963185	N
AT1G11890|AT1G11890|1|+	1217.5	4012969	1:4012752-4013104	67.69	97.41	0.41	60.60	111.70	0.35	71.24	81.67	0.47	35.12	113.81	0.24	70.82	85.64	0.45	69.37	107.73	0.39	117.18	176.43	0.40	172.00	126.62	0.58	124.06	120.71	0.51	117.93	184.88	0.39	167.91	120.92	0.58	173.26	88.32	0.66	0.385	0.52	-0.135	0.009927146447191174	0.03046511866761541	N
AT1G11905|AT1G11905|1|+	735.1	4016297	1:4015840-4016544	34.18	31.76	0.52	18.86	47.01	0.29	29.78	48.43	0.38	43.90	15.41	0.74	16.09	61.83	0.21	30.98	49.47	0.39	65.57	13.81	0.83	59.96	23.30	0.72	61.64	46.90	0.57	57.12	30.18	0.65	62.91	41.79	0.60	88.17	18.61	0.83	0.4216666666666667	0.6999999999999998	-0.27833333333333315	0.0002425518607207754	0.0012077222841448349	N
AT1G11910|AT1G11910|1|-	195715.5	4016972	1:4016712-4017203	548.71	1852.37	0.23	530.37	1868.28	0.22	490.99	1733.08	0.22	417.53	1534.70	0.21	461.98	1811.46	0.20	423.82	1671.51	0.20	620.18	1761.96	0.26	1134.25	2352.07	0.33	890.98	2356.82	0.27	832.33	1913.92	0.30	1061.57	2135.13	0.33	1115.39	2130.35	0.34	0.21333333333333335	0.30500000000000005	-0.0916666666666667	2.5047690309126408e-14	5.815394827144605e-13	N
AT1G11930|AT1G11930|1|+	4963.1	4030456	1:4030221-4030656	25.40	215.44	0.11	24.01	222.19	0.10	27.81	179.79	0.13	44.05	181.10	0.20	29.06	196.10	0.13	8.64	205.85	0.04	19.37	249.11	0.07	51.21	332.58	0.13	27.05	288.90	0.09	26.45	361.90	0.07	45.18	425.62	0.10	35.87	423.03	0.08	0.11833333333333335	0.09000000000000001	0.028333333333333335	0.32660009069139373	0.5106884502282265	N
AT1G12000|AT1G12000|1|-	3524.9	4050031	1:4049896-4050232	7.84	134.57	0.06	3.04	144.65	0.02	4.49	129.59	0.03	28.45	134.05	0.18	1.57	169.48	0.01	6.38	99.55	0.06	9.17	212.16	0.04	9.52	191.66	0.05	17.08	211.75	0.07	5.12	183.55	0.03	13.12	217.30	0.06	28.36	191.86	0.13	0.06	0.06333333333333334	-0.003333333333333341	1.0	1.0	N
AT1G12010|AT1G12010|1|+	110.3	4057702	1:4057383-4057968	18.47	15.97	0.54	11.39	22.81	0.33	12.57	25.55	0.33	13.82	17.62	0.44	14.22	28.58	0.33	9.93	30.89	0.24	17.76	21.41	0.45	9.42	36.36	0.21	15.42	35.11	0.31	NA	NA	NA	21.07	35.67	0.37	10.87	23.99	0.31	0.36833333333333335	0.32999999999999996	0.038333333333333386	0.8128314994405874	0.9523394449566281	N
AT1G12080|AT1G12080|1|+	8744.7	4084899	1:4084487-4085185	159.31	304.54	0.34	108.50	309.36	0.26	205.81	664.90	0.24	92.69	351.52	0.21	115.62	349.43	0.25	75.25	320.42	0.19	101.55	344.65	0.23	75.72	274.83	0.22	34.21	206.24	0.14	103.94	282.25	0.27	158.62	247.82	0.39	224.39	382.97	0.37	0.24833333333333332	0.27	-0.021666666666666695	0.1997485780753436	0.3519953219249316	N
AT1G12110|AT1G12110|1|+	2579.0	4109186	1:4108426-4109601	286.09	133.08	0.68	239.14	91.94	0.72	331.80	150.44	0.69	214.82	212.08	0.50	308.46	123.46	0.71	318.00	138.10	0.70	227.33	45.75	0.83	200.02	28.45	0.88	183.93	3.88	0.98	194.86	19.60	0.91	178.82	34.71	0.84	220.20	4.48	0.98	0.6666666666666666	0.9033333333333333	-0.2366666666666667	1.1854715830942254e-11	2.0703042392279998e-10	N
AT1G12120|AT1G12120|1|-	5590.7	4116069	1:4114674-4116270	218.78	0.00	1.00	193.61	0.00	1.00	242.04	0.00	1.00	204.10	0.00	1.00	192.21	0.00	1.00	185.75	0.00	1.00	281.00	0.00	1.00	248.44	0.00	1.00	265.95	0.00	1.00	268.20	0.00	1.00	259.95	0.00	1.00	284.54	0.00	1.00	1.0	1.0	0.0	1.0	1.0	N
AT1G12200|AT1G12200|1|+	575.5	4139824	1:4139620-4140158	44.22	159.73	0.22	29.39	142.44	0.17	33.59	121.66	0.22	22.40	125.54	0.15	24.79	142.19	0.15	60.23	141.89	0.30	30.63	80.52	0.28	15.36	98.19	0.14	32.53	125.01	0.21	24.02	124.44	0.16	23.83	64.87	0.27	37.70	117.77	0.24	0.20166666666666666	0.21666666666666667	-0.015000000000000013	0.8859672481941254	0.9986225663912233	N
AT1G12230|AT1G12230|1|+	15412.0	4150798	1:4150562-4151056	123.70	615.80	0.17	144.83	598.18	0.19	132.97	593.26	0.18	128.45	584.93	0.18	149.58	589.39	0.20	154.19	652.11	0.19	138.79	627.92	0.18	300.80	695.18	0.30	195.22	578.72	0.25	225.82	703.40	0.24	224.85	682.85	0.25	246.85	669.75	0.27	0.18499999999999997	0.24833333333333332	-0.06333333333333335	0.0014693745736089343	0.0059090146248288065	N
AT1G12240|AT1G12240|1|+	317355.5	4157465	1:4157239-4157653	186.15	568.32	0.25	149.85	748.92	0.17	295.37	1105.44	0.21	136.05	599.88	0.18	158.50	570.53	0.22	163.02	651.60	0.20	782.36	1833.91	0.30	1112.81	2442.81	0.31	1283.03	2845.09	0.31	1566.91	3470.98	0.31	1302.47	2366.66	0.35	1408.16	3143.14	0.31	0.205	0.315	-0.11000000000000001	1.1636902469756264e-11	2.0394338596467016e-10	N
AT1G12244|AT1G12244|1|+	248.8	4158945	1:4158744-4159046	16.44	32.61	0.34	16.29	49.44	0.25	27.80	41.24	0.40	54.96	24.23	0.69	29.11	18.78	0.61	25.28	26.43	0.49	54.46	9.02	0.86	93.51	43.00	0.69	70.70	23.63	0.75	69.49	67.79	0.51	74.89	40.58	0.65	47.71	52.41	0.48	0.4633333333333334	0.6566666666666666	-0.19333333333333325	0.049824968097811194	0.11777133872215743	N
AT1G12250|AT1G12250|1|+	9877.8	4161279	1:4161078-4161506	75.22	245.47	0.23	45.65	309.00	0.13	64.13	221.84	0.22	62.83	188.07	0.25	68.67	224.07	0.23	67.04	282.73	0.19	149.54	272.33	0.35	278.85	297.73	0.48	267.20	279.90	0.49	179.18	312.86	0.36	354.24	293.45	0.55	238.45	354.27	0.40	0.20833333333333334	0.43833333333333324	-0.2299999999999999	4.1981498201292826e-13	8.461869120207847e-12	N
AT1G12320|AT1G12320|1|+	202.1	4189838	1:4189631-4190342	59.16	12.59	0.82	54.65	48.80	0.53	54.07	25.01	0.68	40.13	35.51	0.53	56.32	42.94	0.57	68.95	0.00	1.00	62.57	0.00	1.00	50.41	0.00	1.00	66.14	10.97	0.86	55.62	0.00	1.00	83.08	0.00	1.00	62.01	0.00	1.00	0.6883333333333335	0.9766666666666666	-0.2883333333333331	3.2138830884789247e-07	2.911244872398822e-06	N
AT1G12330|AT1G12330|1|+	433.0	4196593	1:4196307-4196749	52.95	35.04	0.60	60.23	64.30	0.48	57.27	28.86	0.66	36.16	56.11	0.39	66.71	52.38	0.56	17.79	68.58	0.21	76.58	6.63	0.92	112.03	0.00	1.00	69.25	48.04	0.59	68.33	19.43	0.78	83.42	22.38	0.79	85.84	17.62	0.83	0.4833333333333334	0.8183333333333334	-0.33499999999999996	1.7489226406810548e-06	1.3947868603890562e-05	N
AT1G12350|AT1G12350|1|+	2171.9	4200713	1:4200394-4200849	22.85	96.38	0.19	29.23	78.31	0.27	38.69	96.08	0.29	11.00	75.68	0.13	39.05	68.84	0.36	45.14	58.25	0.44	55.17	87.92	0.39	107.76	101.06	0.52	74.94	71.19	0.51	71.36	136.70	0.34	128.95	119.09	0.52	90.67	129.09	0.41	0.27999999999999997	0.4483333333333334	-0.16833333333333345	0.003187891456191248	0.011552909336313796	N
AT1G12390|AT1G12390|1|+	1702.7	4221646	1:4221445-4221803	19.28	57.41	0.25	1.86	60.90	0.03	13.20	87.13	0.13	2.02	46.53	0.04	14.07	81.40	0.15	6.56	71.00	0.08	18.76	115.23	0.14	31.04	122.89	0.20	32.21	118.39	0.21	23.57	107.42	0.18	53.46	79.85	0.40	23.65	120.07	0.16	0.11333333333333333	0.21499999999999997	-0.10166666666666664	0.09627717685183508	0.1986576473752582	N
AT1G12410|AT1G12410|1|+	47100.6	4225018	1:4224817-4225254	8.73	349.59	0.02	4.49	354.43	0.01	7.38	315.86	0.02	10.98	326.47	0.03	6.53	400.14	0.02	5.66	345.46	0.02	54.33	530.90	0.09	78.58	784.20	0.09	88.95	736.36	0.11	58.15	721.56	0.07	93.81	796.00	0.11	69.20	743.23	0.09	0.02	0.09333333333333332	-0.07333333333333332	1.998420154154079e-06	1.571068122771288e-05	N
AT1G12430|AT1G12430|1|-	308.6	4234060	1:4233717-4234285	12.60	42.71	0.23	9.07	63.12	0.13	8.93	56.19	0.14	12.00	77.22	0.13	7.53	26.81	0.22	12.88	76.23	0.14	14.08	64.10	0.18	13.38	67.14	0.17	18.17	101.08	0.15	24.25	82.29	0.23	13.20	49.75	0.21	23.00	78.96	0.23	0.165	0.19499999999999998	-0.02999999999999997	0.6695178594992534	0.8384680248380398	N
AT1G12460|AT1G12460|1|+	743.0	4250251	1:4248950-4250758	57.87	4.82	0.92	36.90	18.24	0.67	46.70	15.88	0.75	55.99	44.42	0.56	37.26	31.08	0.55	46.30	28.31	0.62	55.14	28.52	0.66	45.89	19.75	0.70	54.03	27.18	0.67	78.71	1.88	0.98	62.81	14.28	0.81	55.07	21.09	0.72	0.6783333333333333	0.7566666666666667	-0.07833333333333337	0.2678840047881196	0.44108754856330473	N
AT1G12500|AT1G12500|1|-	4577.6	4263395	1:4263150-4263955	68.39	98.55	0.41	97.61	59.35	0.62	70.33	123.01	0.36	58.72	165.97	0.26	29.14	141.25	0.17	32.46	132.36	0.20	153.20	198.72	0.44	216.06	186.11	0.54	197.14	161.52	0.55	248.32	131.13	0.65	254.31	146.55	0.63	200.79	133.34	0.60	0.33666666666666667	0.5683333333333334	-0.2316666666666667	1.1663978306593985e-07	1.1318843010998479e-06	N
AT1G12520|AT1G12520|1|-	1479.3	4267264	1:4267074-4267543	77.45	114.09	0.40	76.51	113.03	0.40	95.15	100.18	0.49	100.89	62.40	0.62	94.08	80.58	0.54	94.99	67.99	0.58	109.90	148.04	0.43	163.24	146.38	0.53	130.92	70.21	0.65	142.17	136.10	0.51	209.84	81.51	0.72	220.39	20.47	0.91	0.505	0.625	-0.12	0.014478364152053232	0.04164529007214037	N
AT1G12530|AT1G12530|1|-	733.8	4269275	1:4268986-4269476	66.49	10.22	0.87	37.40	35.10	0.52	39.45	33.18	0.54	37.64	10.14	0.79	84.97	0.00	1.00	58.27	20.40	0.74	100.22	0.00	1.00	152.76	0.00	1.00	101.03	0.00	1.00	121.19	0.00	1.00	107.36	0.00	1.00	146.45	0.00	1.00	0.7433333333333333	1.0	-0.2566666666666667	4.353475177263966e-09	5.380657069212939e-08	N
AT1G12580|AT1G12580|1|+	2505.9	4285705	1:4285386-4285876	88.61	80.03	0.53	53.70	95.10	0.36	83.00	121.98	0.40	116.01	49.55	0.70	60.71	91.66	0.40	63.13	76.26	0.45	237.88	98.05	0.71	237.66	101.52	0.70	287.34	116.98	0.71	300.93	154.00	0.66	218.39	173.67	0.56	336.43	130.46	0.72	0.4733333333333334	0.6766666666666667	-0.20333333333333337	1.4378746602936139e-05	9.375433398515512e-05	N
AT1G12640|AT1G12640|1|-	1183.4	4303522	1:4303280-4303723	42.53	118.07	0.26	32.30	106.38	0.23	31.57	101.00	0.24	43.69	109.74	0.28	16.03	147.54	0.10	52.23	107.39	0.33	45.08	179.95	0.20	79.14	134.71	0.37	36.31	160.22	0.18	55.33	185.97	0.23	54.96	189.16	0.23	54.43	148.13	0.27	0.24000000000000002	0.24666666666666667	-0.006666666666666654	0.9024579736187035	1.0	N
AT1G12650|AT1G12650|1|+	755.3	4307788	1:4307578-4308007	66.12	60.30	0.52	51.04	75.04	0.40	66.06	55.24	0.54	76.52	37.23	0.67	40.81	116.55	0.26	47.26	68.83	0.41	52.64	85.00	0.38	80.99	113.59	0.42	62.13	106.71	0.37	72.81	113.10	0.39	107.90	120.56	0.47	59.91	130.15	0.32	0.4666666666666666	0.39166666666666666	0.07499999999999996	0.2914479952471193	0.469844050741503	N
AT1G12680|AT1G12680|1|-	997.4	4320066	1:4319877-4320484	53.73	51.79	0.51	40.03	68.70	0.37	66.84	45.25	0.60	68.25	42.24	0.62	44.04	65.41	0.40	36.29	71.17	0.34	83.31	34.50	0.71	143.90	17.86	0.89	187.33	0.00	1.00	135.27	41.02	0.77	208.69	0.00	1.00	112.88	64.03	0.64	0.47333333333333333	0.835	-0.36166666666666664	3.847271933591866e-11	6.2467877784481e-10	N
AT1G12730|AT1G12730|1|+	268.3	4337724	1:4337523-4337957	13.20	42.10	0.24	11.60	25.75	0.31	9.34	23.98	0.28	5.43	33.66	0.14	12.06	24.21	0.33	6.65	31.22	0.18	19.85	26.81	0.43	15.34	49.58	0.24	7.64	54.83	0.12	58.39	9.61	0.86	13.84	61.76	0.18	42.79	22.45	0.66	0.24666666666666667	0.415	-0.1683333333333333	0.08559308152310985	0.18211790672147682	N
AT1G12750|AT1G12750|1|-	1495.3	4345512	1:4344943-4345713	53.75	0.00	1.00	48.68	0.00	1.00	78.63	8.64	0.90	51.10	13.77	0.79	60.64	0.00	1.00	74.86	0.00	1.00	80.79	0.00	1.00	85.03	0.00	1.00	79.00	0.00	1.00	88.08	0.00	1.00	96.88	0.00	1.00	88.99	0.00	1.00	0.9483333333333333	1.0	-0.05166666666666675	0.07557409758752036	0.16494175438769818	N
AT1G12760|AT1G12760|1|+	2630.2	4350595	1:4350339-4350993	35.54	192.12	0.16	32.74	217.10	0.13	49.38	168.84	0.23	24.20	139.43	0.15	16.54	177.00	0.09	26.97	195.59	0.12	44.28	283.83	0.13	72.30	359.60	0.17	58.86	289.11	0.17	77.22	301.12	0.20	94.56	295.64	0.24	97.35	311.80	0.24	0.14666666666666667	0.19166666666666668	-0.04500000000000001	0.1154962105529419	0.22921626608040419	N
AT1G12770|AT1G12770|1|+	3232.3	4352024	1:4351823-4353797	199.15	0.00	1.00	215.08	0.00	1.00	173.98	0.00	1.00	235.82	0.00	1.00	187.32	0.00	1.00	196.33	6.47	0.97	173.45	0.00	1.00	182.84	0.00	1.00	180.35	0.00	1.00	148.20	0.00	1.00	179.85	0.00	1.00	159.15	0.00	1.00	0.995	1.0	-0.0050000000000000044	1.0	1.0	N
AT1G12800|AT1G12800|1|-	13043.2	4361651	1:4361551-4361852	190.16	334.98	0.36	133.81	348.01	0.28	114.70	297.71	0.28	211.89	341.61	0.38	147.37	319.53	0.32	123.67	296.58	0.29	200.70	410.85	0.33	280.85	456.22	0.38	306.58	354.05	0.46	204.86	358.34	0.36	312.81	393.49	0.44	276.05	422.48	0.40	0.31833333333333336	0.39499999999999996	-0.0766666666666666	0.00885360474882013	0.0276922475256612	N
AT1G12840|AT1G12840|1|+	24518.8	4378322	1:4378121-4378514	278.98	229.12	0.55	244.58	276.40	0.47	294.14	197.92	0.60	232.15	310.83	0.43	167.03	266.15	0.39	238.49	281.58	0.46	352.76	302.10	0.54	562.93	214.21	0.72	463.52	227.27	0.67	371.78	297.17	0.56	381.42	316.26	0.55	426.85	265.17	0.62	0.4833333333333334	0.61	-0.1266666666666666	9.545552995617464e-06	6.502621987831596e-05	N
AT1G12850|AT1G12850|1|-	1678.6	4380465	1:4379694-4380666	202.97	0.00	1.00	187.92	0.00	1.00	192.90	0.00	1.00	195.38	24.06	0.89	170.15	0.00	1.00	205.84	0.00	1.00	155.90	0.00	1.00	146.58	0.00	1.00	136.98	0.00	1.00	165.35	0.00	1.00	162.22	0.00	1.00	150.19	0.00	1.00	0.9816666666666668	1.0	-0.0183333333333332	0.13486357885511766	0.25936508284948795	N
AT1G12860|AT1G12860|1|+	7285.2	4386220	1:4386019-4386651	91.26	69.19	0.57	106.57	61.29	0.63	106.40	62.42	0.63	70.77	62.50	0.53	95.49	28.19	0.77	75.27	43.22	0.64	145.26	72.79	0.67	208.36	43.55	0.83	187.09	63.26	0.75	141.70	109.97	0.56	202.12	26.07	0.89	190.52	0.00	1.00	0.6283333333333334	0.7833333333333333	-0.15499999999999992	0.002142092424758055	0.008176926854661095	N
AT1G12880|AT1G12880|1|+	583.7	4391065	1:4390864-4391344	4.33	44.60	0.09	9.06	57.70	0.14	2.80	27.97	0.09	9.26	39.32	0.19	5.38	32.33	0.14	2.24	35.11	0.06	6.92	69.00	0.09	12.34	88.07	0.12	14.34	111.30	0.11	17.30	114.50	0.13	21.17	178.08	0.11	14.38	94.78	0.13	0.11833333333333333	0.115	0.003333333333333327	1.0	1.0	N
AT1G12900|AT1G12900|1|-	3166738.1	4392765	1:4392438-4393136	5376.63	3287.22	0.62	5448.97	3349.85	0.62	4565.02	3266.22	0.58	4935.79	3805.67	0.56	5247.35	3411.78	0.61	5117.00	3900.35	0.57	5830.52	3318.61	0.64	7463.60	2734.92	0.73	5353.94	3361.78	0.61	5279.58	2697.26	0.66	6936.25	2956.11	0.70	6264.77	2653.27	0.70	0.5933333333333333	0.6733333333333333	-0.08000000000000007	8.007748333959118e-31	5.100833025291779e-29	N
AT1G12920|AT1G12920|1|-	19056.8	4397716	1:4396348-4397917	272.32	41.77	0.87	307.25	0.00	1.00	299.32	14.99	0.95	255.08	0.00	1.00	261.56	45.85	0.85	265.87	37.03	0.88	368.68	0.00	1.00	370.82	0.00	1.00	391.42	0.00	1.00	353.57	0.00	1.00	368.25	0.00	1.00	381.63	0.00	1.00	0.9249999999999999	1.0	-0.07500000000000007	5.180486584892219e-09	6.34753331616202e-08	N
AT1G12930|AT1G12930|1|-	209.5	4398611	1:4398322-4398824	33.19	58.62	0.36	14.75	54.57	0.21	37.26	70.97	0.34	37.67	58.41	0.39	20.46	44.50	0.31	19.97	56.71	0.26	33.40	73.80	0.31	35.12	54.43	0.39	24.72	25.38	0.49	19.64	49.05	0.29	22.29	50.56	0.31	29.23	85.49	0.25	0.31166666666666665	0.34	-0.028333333333333377	1.0	1.0	N
AT1G12990|AT1G12990|1|+	689.7	4434807	1:4434455-4436101	61.77	35.28	0.64	65.80	16.94	0.80	83.95	42.36	0.66	86.91	9.29	0.90	58.32	31.20	0.65	60.84	26.85	0.69	154.10	11.43	0.93	106.95	0.00	1.00	124.27	70.03	0.64	106.37	56.43	0.65	102.33	0.00	1.00	123.11	15.30	0.89	0.7233333333333333	0.8516666666666667	-0.1283333333333334	0.07641079274193607	0.16647534476575726	N
AT1G13000|AT1G13000|1|-	368.0	4436267	1:4436102-4436503	26.96	32.90	0.45	27.71	40.44	0.41	21.51	66.74	0.24	35.02	36.59	0.49	27.74	36.33	0.43	42.14	30.63	0.58	40.01	45.58	0.47	26.29	71.27	0.27	32.51	74.20	0.30	59.92	72.76	0.45	35.37	48.39	0.42	37.51	95.51	0.28	0.43333333333333335	0.365	0.06833333333333336	0.4295819964212434	0.6202331465695622	N
AT1G13020|AT1G13020|1|-	841.7	4440683	1:4440404-4440954	16.47	75.08	0.18	29.16	46.24	0.39	17.38	60.73	0.22	12.05	65.24	0.16	28.47	50.61	0.36	13.27	47.39	0.22	28.76	61.20	0.32	58.32	66.52	0.47	21.67	77.31	0.22	17.83	70.47	0.20	28.40	94.41	0.23	35.18	75.15	0.32	0.255	0.29333333333333333	-0.03833333333333333	0.6136838010437093	0.7897587215608353	N
AT1G13060|AT1G13060|1|+	20973.4	4454737	1:4454536-4454900	85.36	317.20	0.21	102.58	319.81	0.24	97.19	306.35	0.24	105.92	231.78	0.31	96.60	268.81	0.26	142.31	301.14	0.32	208.62	436.05	0.32	335.97	577.04	0.37	242.12	710.17	0.25	285.07	563.73	0.34	311.77	686.34	0.31	294.46	553.62	0.35	0.26333333333333336	0.3233333333333333	-0.05999999999999994	0.040546128680546634	0.09918928623795961	N
AT1G13080|AT1G13080|1|+	5456.4	4460742	1:4460196-4460996	194.55	190.72	0.50	198.02	160.78	0.55	186.37	172.64	0.52	177.58	150.53	0.54	170.71	207.67	0.45	185.58	175.35	0.51	154.48	143.29	0.52	191.78	179.57	0.52	197.36	110.40	0.64	182.81	36.57	0.83	259.34	98.71	0.72	208.32	27.83	0.88	0.5116666666666667	0.685	-0.17333333333333334	7.008171297593764e-05	0.0003943386080644917	N
AT1G13110|AT1G13110|1|+	8325.9	4468813	1:4468246-4469033	431.94	12.82	0.97	342.59	74.62	0.82	500.03	179.18	0.74	266.87	107.64	0.71	344.94	165.04	0.68	314.52	183.09	0.63	605.32	40.61	0.94	659.54	0.00	1.00	509.25	58.91	0.90	563.05	43.56	0.93	492.36	17.27	0.97	689.35	0.00	1.00	0.7583333333333334	0.9566666666666667	-0.19833333333333325	8.511323116537047e-24	3.9894819721239925e-22	N
AT1G13120|AT1G13120|1|-	421.9	4469382	1:4469144-4469621	34.57	47.24	0.42	36.44	35.59	0.51	33.39	54.03	0.38	17.25	97.87	0.15	45.17	27.76	0.62	47.80	24.97	0.66	48.10	41.78	0.54	36.44	79.89	0.31	65.02	35.33	0.65	43.38	88.41	0.33	32.82	67.35	0.33	29.49	89.95	0.25	0.4566666666666667	0.40166666666666667	0.05500000000000005	0.6550364095457997	0.8260275129005852	N
AT1G13145|AT1G13145|1|+	264.6	4481061	1:4480860-4481334	46.66	17.83	0.72	33.97	25.70	0.57	34.63	31.56	0.52	20.56	31.72	0.39	24.26	32.31	0.43	30.38	40.72	0.43	13.96	33.15	0.30	59.34	18.16	0.77	46.43	0.00	1.00	21.81	70.28	0.24	52.04	34.28	0.60	29.26	88.33	0.25	0.5100000000000001	0.5266666666666667	-0.016666666666666607	0.7318917549923576	0.8888790478317108	N
AT1G13160|AT1G13160|1|+	1052.5	4488417	1:4488131-4488533	82.38	0.00	1.00	56.84	39.52	0.59	66.19	7.53	0.90	60.59	25.75	0.70	79.94	0.00	1.00	64.42	4.87	0.93	82.94	3.53	0.96	135.27	0.00	1.00	86.27	0.00	1.00	66.90	0.34	0.99	94.98	0.00	1.00	82.54	13.23	0.86	0.8533333333333332	0.9683333333333334	-0.11500000000000021	0.0035550041313842616	0.012711794189840017	N
AT1G13170|AT1G13170|1|-	149.8	4488813	1:4488577-4489014	6.74	31.64	0.18	3.24	30.42	0.10	3.36	34.03	0.09	5.18	37.17	0.12	NA	NA	NA	10.95	59.97	0.15	18.17	30.20	0.38	19.21	47.65	0.29	1.72	33.67	0.05	11.13	48.86	0.19	32.00	26.60	0.55	0.76	46.09	0.02	0.128	0.24666666666666667	-0.11866666666666667	0.11653907897025849	0.2309426531453668	N
AT1G13190|AT1G13190|1|+	3298.6	4499820	1:4499619-4501581	132.87	4.18	0.97	142.82	0.00	1.00	162.48	0.00	1.00	130.11	0.00	1.00	132.35	0.00	1.00	102.95	12.42	0.89	158.86	0.00	1.00	136.97	0.00	1.00	165.04	0.00	1.00	180.70	0.00	1.00	156.35	0.00	1.00	138.62	0.00	1.00	0.9766666666666666	1.0	-0.023333333333333428	0.2143618912193429	0.37187746386986914	N
AT1G13195|AT1G13195|1|-	267.5	4501787	1:4501624-4501994	31.46	24.88	0.56	31.44	21.43	0.59	26.33	29.98	0.47	21.97	36.69	0.37	38.09	4.48	0.89	31.99	14.71	0.68	22.20	33.99	0.40	8.87	40.16	0.18	9.60	39.93	0.19	106.88	0.00	1.00	8.60	32.44	0.21	29.60	30.56	0.49	0.5933333333333334	0.4116666666666666	0.18166666666666675	0.5675393087629819	0.7475660274625862	N
AT1G13220|AT1G13220|1|+	369.6	4520025	1:4519699-4520306	65.88	7.70	0.90	34.24	34.16	0.50	46.32	12.21	0.79	45.85	13.69	0.77	33.38	36.93	0.47	41.81	47.67	0.47	31.70	34.00	0.48	97.41	0.00	1.00	67.07	17.48	0.79	40.79	57.71	0.41	78.40	48.05	0.62	90.41	0.00	1.00	0.6499999999999999	0.7166666666666668	-0.06666666666666687	0.3058996554514035	0.48729158002895107	N
AT1G13270|AT1G13270|1|+	1068.6	4547211	1:4547010-4547373	30.25	106.04	0.22	53.07	79.18	0.40	22.52	78.01	0.22	48.13	97.29	0.33	7.11	106.58	0.06	22.51	101.66	0.18	13.15	92.42	0.12	32.62	98.06	0.25	9.70	92.34	0.10	24.63	97.66	0.20	19.68	125.17	0.14	18.10	110.02	0.14	0.235	0.15833333333333333	0.07666666666666666	0.1112414096981978	0.22223680904121262	N
AT1G13280|AT1G13280|1|+	1532.6	4548596	1:4548023-4548894	88.29	125.80	0.41	70.40	117.27	0.38	77.26	152.79	0.34	70.04	68.06	0.51	79.61	91.17	0.47	66.48	139.33	0.32	101.33	126.58	0.44	102.97	115.51	0.47	84.08	138.82	0.38	123.02	148.04	0.45	99.15	120.69	0.45	103.68	135.16	0.43	0.405	0.4366666666666667	-0.031666666666666676	0.3732030674656621	0.5636903604508716	N
AT1G13300|AT1G13300|1|+	188.3	4558451	1:4558250-4558793	51.35	15.35	0.77	37.12	23.26	0.61	55.07	37.04	0.60	28.75	53.21	0.35	54.32	23.52	0.70	42.63	52.77	0.45	70.19	41.53	0.63	74.91	7.37	0.91	56.50	32.39	0.64	54.61	0.00	1.00	62.35	31.04	0.67	94.19	0.00	1.00	0.5800000000000001	0.8083333333333332	-0.22833333333333317	0.002411715594121229	0.009081173876007067	N
AT1G13320|AT1G13320|1|-	4203.7	4563580	1:4563428-4563811	53.78	230.58	0.19	31.46	259.25	0.11	44.26	214.16	0.17	23.76	219.14	0.10	43.35	221.95	0.16	38.16	205.63	0.16	78.38	297.23	0.21	110.32	459.86	0.19	119.00	339.67	0.26	71.69	250.41	0.22	120.97	396.97	0.23	106.34	307.15	0.26	0.14833333333333334	0.22833333333333336	-0.08000000000000002	0.011016346634330348	0.0332329801169826	N
AT1G13350|AT1G13350|1|-	1002.0	4572485	1:4572304-4572932	32.27	105.43	0.23	37.40	86.20	0.30	41.46	87.74	0.32	21.01	112.21	0.16	43.51	86.00	0.34	36.78	114.03	0.24	42.80	125.35	0.25	65.39	80.13	0.45	48.38	108.41	0.31	78.45	66.00	0.54	66.67	87.80	0.43	69.85	104.78	0.40	0.265	0.39666666666666667	-0.13166666666666665	0.02429370674026054	0.06461235857512083	N
AT1G13380|AT1G13380|1|-	1693.6	4589210	1:4588994-4589476	80.22	157.50	0.34	87.96	131.82	0.40	69.71	131.69	0.35	52.52	108.96	0.33	44.53	118.63	0.27	50.49	151.98	0.25	83.20	133.88	0.38	89.87	169.62	0.35	104.64	109.07	0.49	137.94	125.43	0.52	68.40	196.39	0.26	93.77	183.74	0.34	0.3233333333333333	0.38999999999999996	-0.06666666666666665	0.19718919627914944	0.34861541858257794	N
AT1G13390|AT1G13390|1|-	1603.4	4592819	1:4592304-4593140	83.86	121.20	0.41	90.43	130.74	0.41	64.97	142.16	0.31	61.43	151.06	0.29	72.06	144.60	0.33	46.39	231.92	0.17	94.71	96.43	0.50	105.78	112.89	0.48	91.95	121.24	0.43	182.64	83.89	0.69	131.66	60.64	0.68	169.02	61.83	0.73	0.32	0.585	-0.26499999999999996	4.0084132300525135e-09	4.9727343654222e-08	N
AT1G13440|AT1G13440|1|-	1059590.6	4608307	1:4608077-4608597	604.97	7406.18	0.08	600.78	7357.27	0.08	452.99	6356.79	0.07	393.71	6450.55	0.06	385.83	6471.61	0.06	326.08	7109.84	0.04	376.02	7126.03	0.05	492.26	9952.56	0.05	379.72	9413.21	0.04	453.13	8001.15	0.05	543.21	9960.32	0.05	340.56	9082.62	0.04	0.065	0.04666666666666666	0.01833333333333334	1.8950187109801018e-06	1.4956950699769079e-05	N
AT1G13460|AT1G13460|1|+	214.3	4618162	1:4617866-4618449	15.53	53.05	0.23	26.41	29.04	0.48	13.74	34.64	0.28	13.29	28.79	0.32	23.80	37.37	0.39	21.88	44.22	0.33	19.42	76.41	0.20	40.63	67.55	0.38	28.38	73.66	0.28	45.19	27.42	0.62	32.88	95.96	0.26	28.26	53.14	0.35	0.3383333333333334	0.34833333333333333	-0.009999999999999953	1.0	1.0	N
AT1G13560|AT1G13560|1|-	9714.3	4638654	1:4638468-4638855	5.62	149.42	0.04	8.04	157.80	0.05	5.43	156.62	0.03	3.97	123.27	0.03	16.90	156.39	0.10	8.92	186.57	0.05	16.90	208.79	0.07	42.58	338.59	0.11	23.25	347.94	0.06	30.41	355.64	0.08	30.48	429.05	0.07	24.25	443.65	0.05	0.049999999999999996	0.07333333333333333	-0.023333333333333338	0.4460828753735476	0.6362459498474153	N
AT1G13570|AT1G13570|1|-	443.1	4642498	1:4642124-4642818	25.97	101.59	0.20	21.89	77.25	0.22	28.17	71.94	0.28	17.53	70.92	0.20	22.34	73.05	0.23	22.96	88.24	0.21	20.90	97.27	0.18	25.05	102.62	0.20	28.79	77.79	0.27	26.00	68.26	0.28	28.83	90.20	0.24	21.37	70.96	0.23	0.22333333333333336	0.2333333333333333	-0.009999999999999953	1.0	1.0	N
AT1G13580|AT1G13580|1|-	183.3	4644790	1:4644521-4645037	5.86	40.97	0.13	6.82	35.15	0.16	2.97	29.42	0.09	15.05	15.44	0.49	4.97	33.71	0.13	2.07	33.20	0.06	6.47	55.63	0.10	12.27	41.09	0.23	17.63	65.03	0.21	0.27	58.98	0.00	3.25	58.03	0.05	11.80	55.42	0.18	0.17666666666666667	0.12833333333333333	0.04833333333333334	0.7665220908668211	0.914444630749688	N
AT1G13640|AT1G13640|1|-	1344.4	4679097	1:4677004-4679298	157.29	0.00	1.00	143.71	0.00	1.00	179.91	0.00	1.00	135.69	10.85	0.93	144.75	0.00	1.00	155.25	0.00	1.00	111.44	0.00	1.00	84.40	0.00	1.00	100.02	0.00	1.00	99.35	0.00	1.00	90.35	0.00	1.00	104.63	0.00	1.00	0.9883333333333333	1.0	-0.011666666666666714	1.0	1.0	N
AT1G13650|AT1G13650|1|-	12115.0	4680639	1:4680290-4680928	80.62	162.49	0.33	117.95	210.31	0.36	53.06	157.41	0.25	120.35	127.26	0.49	95.34	188.43	0.34	68.70	274.66	0.20	246.21	411.00	0.37	472.92	618.47	0.43	285.57	666.73	0.30	237.25	497.31	0.32	438.39	578.32	0.43	242.24	348.43	0.41	0.3283333333333333	0.3766666666666667	-0.048333333333333395	0.09727890267876943	0.20014090777870613	N
AT1G13690|AT1G13690|1|+	1137.6	4694243	1:4693985-4694372	54.05	93.66	0.37	60.05	115.10	0.34	48.44	105.14	0.32	42.38	70.67	0.37	47.95	98.53	0.33	44.53	81.13	0.35	61.46	121.98	0.34	76.42	202.54	0.27	65.33	155.55	0.30	124.34	114.95	0.52	51.94	164.40	0.24	92.39	143.35	0.39	0.3466666666666667	0.3433333333333333	0.003333333333333355	1.0	1.0	N
AT1G13700|AT1G13700|1|-	2639.8	4694562	1:4694410-4694951	63.29	33.85	0.65	67.88	36.28	0.65	100.09	47.39	0.68	77.86	0.00	1.00	75.47	22.96	0.77	120.40	8.62	0.93	216.67	43.42	0.83	285.12	0.00	1.00	255.55	3.80	0.99	287.93	0.00	1.00	178.82	3.51	0.98	341.65	0.00	1.00	0.7799999999999999	0.9666666666666668	-0.18666666666666687	1.7092062585458418e-08	1.903202262887548e-07	N
AT1G13730|AT1G13730|1|+	638.3	4712438	1:4712115-4712672	17.97	63.58	0.22	18.45	88.63	0.17	14.85	87.90	0.14	10.34	85.21	0.11	19.78	70.11	0.22	16.71	68.45	0.20	37.64	99.20	0.28	50.48	174.26	0.22	37.77	105.05	0.26	54.76	97.35	0.36	73.49	104.75	0.41	53.37	93.13	0.36	0.17666666666666667	0.315	-0.13833333333333334	0.017616330853400204	0.04910336036191804	N
AT1G13780|AT1G13780|1|+	237.4	4726287	1:4726033-4726558	8.70	46.08	0.16	12.67	68.38	0.16	15.31	45.16	0.25	4.57	33.38	0.12	25.13	21.93	0.53	13.08	60.13	0.18	12.37	54.81	0.18	16.20	83.82	0.16	21.50	54.69	0.28	16.25	31.85	0.34	15.75	89.12	0.15	16.96	51.94	0.25	0.23333333333333336	0.22666666666666666	0.00666666666666671	0.8352069979365504	0.9673018419321835	N
AT1G13820|AT1G13820|1|+	7225.5	4737666	1:4737465-4737910	83.26	288.96	0.22	68.82	304.36	0.18	46.13	291.73	0.14	63.28	273.49	0.19	61.04	318.55	0.16	50.53	255.95	0.16	88.78	331.20	0.21	234.12	379.24	0.38	157.32	315.96	0.33	134.01	327.53	0.29	156.75	274.97	0.36	159.13	298.95	0.35	0.17500000000000002	0.32	-0.145	1.4420871811550715e-06	1.1678908165556597e-05	N
AT1G13860|AT1G13860|1|-	356.2	4743668	1:4743204-4743903	17.97	34.33	0.34	15.58	42.42	0.27	16.14	23.46	0.41	27.32	46.41	0.37	9.19	32.71	0.22	15.79	52.47	0.23	18.78	40.11	0.32	23.93	28.19	0.46	20.69	65.46	0.24	39.01	2.55	0.94	25.72	62.30	0.29	28.11	21.84	0.56	0.3066666666666667	0.4683333333333333	-0.16166666666666663	0.18151847714842906	0.3265295270499528	N
AT1G13870|AT1G13870|1|-	791.0	4748163	1:4747186-4748364	56.80	10.92	0.84	55.13	12.30	0.82	53.92	28.79	0.65	53.33	4.07	0.93	56.56	26.54	0.68	55.59	17.25	0.76	83.54	14.09	0.86	109.02	0.00	1.00	127.34	0.00	1.00	123.67	0.00	1.00	100.93	0.00	1.00	104.26	0.00	1.00	0.7800000000000001	0.9766666666666666	-0.19666666666666643	7.186809237825006e-06	5.0757159485619815e-05	N
AT1G13880|AT1G13880|1|+	1279.3	4750036	1:4749835-4751234	150.40	0.00	1.00	143.95	0.00	1.00	165.89	0.00	1.00	174.79	0.00	1.00	158.17	0.00	1.00	167.71	0.00	1.00	150.55	0.00	1.00	132.94	0.00	1.00	155.55	0.00	1.00	160.22	0.00	1.00	136.09	0.00	1.00	151.41	0.00	1.00	1.0	1.0	0.0	1.0	1.0	N
AT1G13900|AT1G13900|1|-	683.1	4754567	1:4753099-4754768	103.85	0.00	1.00	95.97	0.00	1.00	79.67	0.00	1.00	135.72	0.00	1.00	97.37	0.00	1.00	94.41	23.57	0.80	93.04	0.00	1.00	80.44	0.00	1.00	71.35	0.00	1.00	81.87	0.00	1.00	79.26	0.00	1.00	71.71	3.54	0.95	0.9666666666666667	0.9916666666666667	-0.025000000000000022	0.2599531615925037	0.43247188460484	N
AT1G13940|AT1G13940|1|-	408.1	4764567	1:4762666-4764768	55.43	0.00	1.00	59.14	0.00	1.00	75.93	0.15	1.00	55.55	0.00	1.00	50.96	0.00	1.00	61.93	3.56	0.95	64.31	0.00	1.00	55.36	0.00	1.00	64.14	0.00	1.00	60.76	0.00	1.00	48.90	0.00	1.00	61.35	0.00	1.00	0.9916666666666667	1.0	-0.008333333333333304	1.0	1.0	N
AT1G13950|AT1G13950|1|+	461.1	4774782	1:4774567-4774935	12.46	54.50	0.19	9.25	72.23	0.11	19.80	72.99	0.21	7.42	44.36	0.14	14.67	57.94	0.20	10.60	70.13	0.13	15.62	67.87	0.19	14.79	96.83	0.13	23.47	137.89	0.15	8.74	53.22	0.14	5.57	77.27	0.07	27.24	90.98	0.23	0.16333333333333336	0.15166666666666664	0.011666666666666714	0.8338522748499371	0.9665216441366878	N
AT1G13960|AT1G13960|1|+	613.3	4779011	1:4778785-4779351	67.77	28.06	0.71	58.19	29.76	0.66	70.82	46.65	0.60	111.34	0.00	1.00	82.45	36.26	0.69	76.49	50.42	0.60	83.81	30.45	0.73	157.85	0.00	1.00	120.20	36.33	0.77	130.60	2.14	0.98	110.84	15.64	0.88	146.30	0.00	1.00	0.71	0.8933333333333334	-0.18333333333333346	0.00022911345069578945	0.001148109107193172	N
AT1G14020|AT1G14020|1|+	136.3	4805172	1:4804844-4805306	41.44	0.00	1.00	26.66	22.84	0.54	48.49	0.00	1.00	51.69	0.00	1.00	33.43	18.41	0.64	55.30	11.09	0.83	35.79	16.02	0.69	85.71	0.00	1.00	40.91	22.96	0.64	58.70	36.87	0.61	59.77	4.89	0.92	32.15	15.94	0.67	0.835	0.755	0.07999999999999996	0.3615421421362076	0.5505124527133765	N
AT1G14030|AT1G14030|1|-	16003.5	4805461	1:4805375-4805676	232.69	0.00	1.00	232.12	0.00	1.00	272.70	0.00	1.00	318.42	0.00	1.00	217.17	0.00	1.00	221.04	0.00	1.00	304.67	0.00	1.00	519.08	0.00	1.00	399.69	0.00	1.00	458.55	0.00	1.00	647.90	0.00	1.00	491.34	0.00	1.00	1.0	1.0	0.0	1.0	1.0	N
AT1G14120|AT1G14120|1|-	1492.3	4833629	1:4833396-4833920	35.96	147.88	0.20	46.23	149.96	0.24	48.15	140.56	0.26	30.17	131.19	0.19	52.57	186.61	0.22	43.42	167.93	0.21	59.29	159.36	0.27	113.42	147.42	0.43	74.99	152.04	0.33	72.36	247.93	0.23	77.72	150.85	0.34	127.51	171.87	0.43	0.21999999999999997	0.3383333333333334	-0.1183333333333334	0.004518143908933157	0.015540600907950427	N
AT1G14130|AT1G14130|1|-	760.8	4836003	1:4835724-4836620	20.34	119.89	0.15	39.70	93.21	0.30	17.02	97.84	0.15	46.32	129.41	0.26	32.07	104.20	0.24	20.74	129.75	0.14	9.29	57.60	0.14	15.30	63.96	0.19	28.30	31.52	0.47	48.50	64.80	0.43	23.39	93.94	0.20	23.20	62.93	0.27	0.2066666666666667	0.2833333333333333	-0.07666666666666663	0.2574840620472142	0.42987552496020953	N
AT1G14140|AT1G14140|1|-	1014.2	4838136	1:4837927-4838661	32.70	46.66	0.41	46.74	15.92	0.75	47.71	37.56	0.56	38.16	17.55	0.68	78.57	12.10	0.87	50.52	29.51	0.63	51.22	39.42	0.57	110.87	24.33	0.82	50.55	64.35	0.44	47.43	82.99	0.36	85.09	51.66	0.62	115.11	0.00	1.00	0.65	0.635	0.015000000000000013	0.8784267927592957	0.9921993506203085	N
AT1G14150|AT1G14150|1|+	64094.8	4840349	1:4839801-4840562	60.36	354.53	0.15	58.21	348.47	0.14	59.26	352.49	0.14	49.81	385.26	0.11	58.03	349.46	0.14	53.34	354.80	0.13	82.61	497.83	0.14	122.50	641.65	0.16	107.26	422.29	0.20	83.16	474.25	0.15	133.48	458.40	0.23	130.67	464.58	0.22	0.135	0.18333333333333335	-0.04833333333333334	0.05699352641901211	0.1315128090552707	N
AT1G14210|AT1G14210|1|-	510.5	4856905	1:4856778-4857182	64.95	106.60	0.38	35.98	82.68	0.30	50.43	118.86	0.30	52.05	138.33	0.27	54.47	83.90	0.39	68.76	109.20	0.39	50.29	89.34	0.36	65.02	138.36	0.32	68.04	95.26	0.42	58.07	128.91	0.31	107.84	64.45	0.63	43.05	130.89	0.25	0.3383333333333334	0.38166666666666665	-0.04333333333333328	0.492351734874717	0.6796081663356109	N
AT1G14250|AT1G14250|1|+	2213.6	4871340	1:4871071-4871488	79.17	67.11	0.54	111.59	88.92	0.56	74.70	66.15	0.53	72.55	88.22	0.45	74.73	100.02	0.43	60.07	125.67	0.32	68.75	80.12	0.46	91.31	51.52	0.64	190.15	20.87	0.90	111.50	64.75	0.63	92.41	138.72	0.40	126.13	31.24	0.80	0.4716666666666667	0.6383333333333333	-0.16666666666666663	0.0016377668723028282	0.006494209660843258	N
AT1G14290|AT1G14290|1|-	2923.0	4880660	1:4880030-4880861	86.56	14.72	0.85	98.79	7.86	0.93	146.77	22.49	0.87	86.47	0.00	1.00	109.03	1.06	0.99	85.28	20.07	0.81	296.07	0.00	1.00	268.01	0.00	1.00	229.09	6.17	0.97	306.81	0.00	1.00	231.88	2.80	0.99	379.94	0.00	1.00	0.9083333333333332	0.9933333333333333	-0.08500000000000008	5.953085884049017e-06	4.2619462845673687e-05	N
AT1G14300|AT1G14300|1|-	892.1	4882512	1:4882336-4882713	13.31	61.74	0.18	13.75	47.47	0.22	11.17	50.17	0.18	1.61	65.86	0.02	15.64	61.66	0.20	8.32	64.22	0.11	16.68	83.25	0.17	14.34	144.92	0.09	23.84	97.30	0.20	22.39	169.28	0.12	18.26	97.98	0.16	13.28	143.47	0.08	0.15166666666666667	0.1366666666666667	0.014999999999999986	0.82883985883371	0.9635214877433993	N
AT1G14320|AT1G14320|1|+	587508.0	4889541	1:4889340-4889704	342.67	1544.03	0.18	365.20	1682.59	0.18	294.22	1562.37	0.16	338.07	1455.38	0.19	303.71	1514.51	0.17	284.02	1589.54	0.15	419.97	2723.33	0.13	729.10	3819.11	0.16	558.34	3248.96	0.15	592.94	3287.06	0.15	827.12	4173.30	0.17	599.45	3402.83	0.15	0.17166666666666666	0.1516666666666667	0.019999999999999962	0.07901842721170683	0.17088272278623087	N
AT1G14340|AT1G14340|1|+	380.9	4898580	1:4898351-4899035	50.11	36.94	0.58	60.58	13.51	0.82	53.25	22.99	0.70	45.57	13.21	0.78	46.50	35.54	0.57	52.21	70.66	0.42	73.63	31.86	0.70	83.04	9.76	0.89	83.61	36.01	0.70	89.75	0.00	1.00	117.39	3.45	0.97	71.08	17.20	0.81	0.6449999999999999	0.8450000000000001	-0.20000000000000018	0.0006544956918964869	0.0028841346742241197	N
AT1G14350|AT1G14350|1|+	229.8	4910738	1:4910537-4911093	52.35	22.82	0.70	44.27	8.51	0.84	62.28	11.97	0.84	51.50	30.37	0.63	33.78	35.58	0.49	58.76	24.55	0.71	61.05	21.59	0.74	101.65	0.00	1.00	47.82	39.86	0.55	54.33	0.04	1.00	76.40	0.00	1.00	55.62	0.00	1.00	0.7016666666666667	0.8816666666666667	-0.18000000000000005	0.015723586088789453	0.04467980410760674	N
AT1G14360|AT1G14360|1|-	770.6	4911354	1:4911168-4911767	75.66	22.72	0.77	63.51	30.73	0.67	66.59	39.71	0.63	53.64	44.25	0.55	47.85	51.88	0.48	87.06	16.46	0.84	52.06	60.31	0.46	95.03	56.76	0.63	103.35	34.09	0.75	122.28	42.66	0.74	165.47	33.16	0.83	151.58	16.49	0.90	0.6566666666666666	0.7183333333333334	-0.06166666666666676	0.15974144053516098	0.2958163799101555	N
AT1G14400|AT1G14400|1|-	26350.7	4927171	1:4926914-4927422	85.04	531.23	0.14	71.74	476.59	0.13	74.74	610.40	0.11	58.94	483.59	0.11	64.56	497.49	0.11	82.92	603.63	0.12	143.52	842.83	0.15	177.48	1085.91	0.14	147.05	957.79	0.13	100.92	887.06	0.10	161.36	869.34	0.16	199.73	935.15	0.18	0.12	0.14333333333333334	-0.023333333333333345	0.18065400216182181	0.32526885658308086	N
AT1G14410|AT1G14410|1|-	516.6	4929193	1:4928921-4929471	15.75	70.27	0.18	9.08	76.91	0.11	8.55	74.00	0.10	13.95	123.35	0.10	7.48	73.43	0.09	10.90	82.27	0.12	17.16	118.56	0.13	18.20	92.06	0.17	10.37	111.64	0.09	24.35	86.13	0.22	30.11	127.27	0.19	22.85	106.00	0.18	0.11666666666666665	0.16333333333333333	-0.046666666666666676	0.3235778747313844	0.5070798519485518	N
AT1G14440|AT1G14440|1|-	1183.9	4939896	1:4938754-4940097	89.85	0.00	1.00	99.50	0.00	1.00	83.54	0.00	1.00	91.84	0.00	1.00	74.25	0.00	1.00	55.17	0.00	1.00	85.82	0.00	1.00	82.23	0.00	1.00	85.87	0.00	1.00	69.57	0.00	1.00	74.17	0.00	1.00	80.42	0.00	1.00	1.0	1.0	0.0	1.0	1.0	N
AT1G14450|AT1G14450|1|-	20785.2	4946287	1:4946192-4946488	9.02	158.16	0.05	4.12	168.71	0.02	10.42	153.22	0.06	21.41	153.25	0.12	10.10	177.93	0.05	18.20	166.98	0.10	19.54	320.69	0.06	35.27	467.42	0.07	30.43	313.17	0.09	21.78	319.59	0.06	34.84	421.87	0.08	21.90	448.80	0.05	0.06666666666666667	0.06833333333333334	-0.0016666666666666774	1.0	1.0	N
AT1G14460|AT1G14460|1|-	194.7	4948844	1:4948638-4949045	2.98	33.07	0.08	NA	NA	NA	NA	NA	NA	4.69	26.51	0.15	NA	NA	NA	3.96	30.83	0.11	NA	NA	NA	6.42	27.52	0.19	4.32	44.33	0.09	NA	NA	NA	1.37	32.20	0.04	6.60	42.44	0.13	0.11333333333333333	0.1125	0.0008333333333333248	1.0	1.0	N
AT1G14510|AT1G14510|1|-	6149.1	4962103	1:4961800-4962443	45.13	237.55	0.16	37.69	221.18	0.15	28.38	282.11	0.09	32.23	287.35	0.10	31.13	219.79	0.12	39.11	276.35	0.12	54.14	309.73	0.15	82.88	363.12	0.19	43.62	355.80	0.11	70.51	331.80	0.18	87.63	341.24	0.20	93.05	335.84	0.22	0.12333333333333334	0.17499999999999996	-0.051666666666666625	0.06851394337048389	0.15234348965596295	N
AT1G14560|AT1G14560|1|+	1051.2	4983180	1:4982764-4983367	8.98	36.58	0.20	4.96	31.14	0.14	8.10	33.51	0.19	19.36	37.27	0.34	5.23	33.62	0.13	18.70	43.05	0.30	20.85	44.35	0.32	18.63	48.66	0.28	7.18	54.75	0.12	20.72	46.57	0.31	8.81	59.41	0.13	27.14	89.29	0.23	0.21666666666666667	0.2316666666666667	-0.015000000000000013	1.0	1.0	N
AT1G14570|AT1G14570|1|+	1922.5	4987226	1:4987025-4987375	94.58	79.20	0.54	98.29	96.68	0.50	109.13	94.35	0.54	84.40	80.48	0.51	81.91	121.26	0.40	75.64	96.97	0.44	106.12	126.92	0.46	117.82	133.55	0.47	179.03	101.15	0.64	243.62	26.80	0.90	163.55	18.11	0.90	195.53	64.56	0.75	0.4883333333333333	0.6866666666666665	-0.19833333333333325	6.698709711245573e-05	0.0003777813757130946	N
AT1G14580|AT1G14580|1|+	4101.7	4992474	1:4991623-4992805	125.35	111.79	0.53	126.90	109.14	0.54	118.41	110.35	0.52	143.30	130.34	0.52	116.61	129.90	0.47	113.14	109.87	0.51	172.46	71.27	0.71	151.54	45.86	0.77	152.97	91.19	0.63	147.02	47.80	0.75	149.32	42.76	0.78	174.23	40.87	0.81	0.515	0.7416666666666666	-0.22666666666666657	1.1540769117025038e-06	9.524968664109452e-06	N
AT1G14610|AT1G14610|1|-	5532.4	5008447	1:5008153-5008676	91.57	314.08	0.23	92.07	213.90	0.30	83.35	282.84	0.23	44.50	240.18	0.16	58.87	252.07	0.19	85.99	296.09	0.23	150.36	277.15	0.35	205.93	263.75	0.44	185.59	206.54	0.47	164.17	307.02	0.35	202.93	371.26	0.35	152.52	333.33	0.31	0.22333333333333336	0.37833333333333335	-0.155	3.7135093175883033e-06	2.7641304935486867e-05	N
AT1G14620|AT1G14620|1|-	473.1	5014879	1:5014675-5015091	9.09	69.92	0.12	24.49	67.32	0.27	14.29	80.81	0.15	15.34	84.38	0.15	14.61	53.90	0.21	23.88	59.95	0.28	16.69	91.05	0.15	58.01	73.45	0.44	34.40	66.75	0.34	21.80	59.92	0.27	49.45	97.08	0.34	34.96	110.33	0.24	0.19666666666666668	0.2966666666666667	-0.1	0.10081287136414134	0.20561935606434165	N
AT1G14650|AT1G14650|1|+	169.5	5031659	1:5031387-5031883	24.88	35.27	0.41	23.55	27.12	0.46	24.12	25.31	0.49	25.77	37.78	0.41	29.21	27.19	0.52	11.29	56.62	0.17	21.20	23.67	0.47	13.25	45.71	0.22	22.92	22.34	0.51	12.88	40.08	0.24	27.50	59.39	0.32	23.05	37.95	0.38	0.41	0.3566666666666667	0.05333333333333329	0.5661830121750371	0.7467545189681006	N
AT1G14670|AT1G14670|1|+	4435.6	5040211	1:5039980-5040597	155.72	287.21	0.35	147.44	238.57	0.38	168.89	302.04	0.36	148.42	263.06	0.36	148.46	266.11	0.36	183.10	212.52	0.46	235.15	233.28	0.50	257.42	167.45	0.61	227.22	330.90	0.41	217.90	121.79	0.64	179.58	260.05	0.41	221.72	191.05	0.54	0.37833333333333324	0.5183333333333333	-0.14000000000000007	0.0001550909000437647	0.0008077244621252043	N
AT1G14690|AT1G14690|1|-	3479.2	5051980	1:5051656-5052428	63.64	146.02	0.30	67.09	140.64	0.32	54.08	140.56	0.28	65.96	122.65	0.35	52.09	138.72	0.27	52.62	151.90	0.26	71.74	193.98	0.27	88.92	219.14	0.29	129.50	247.64	0.34	165.03	126.67	0.57	148.33	128.19	0.54	88.32	215.05	0.29	0.2966666666666667	0.38333333333333336	-0.08666666666666667	0.0683642953715132	0.1521469211885166	N
AT1G14700|AT1G14700|1|+	34173.7	5060984	1:5060584-5061140	199.67	88.33	0.69	172.77	132.57	0.57	200.11	100.38	0.67	126.41	64.06	0.66	150.17	99.43	0.60	128.70	110.22	0.54	231.37	85.63	0.73	326.23	133.92	0.71	288.30	126.28	0.70	177.20	73.55	0.71	243.88	81.31	0.75	238.02	139.29	0.63	0.6216666666666667	0.705	-0.08333333333333326	0.03790046042371241	0.0937791023980155	N
AT1G14710|AT1G14710|1|-	6158.0	5062028	1:5061694-5062717	40.44	156.79	0.21	22.01	181.31	0.11	39.60	187.10	0.17	37.19	189.71	0.16	47.00	159.57	0.23	38.66	174.76	0.18	61.19	267.62	0.19	67.49	267.30	0.20	62.39	295.69	0.17	42.74	270.35	0.14	87.97	254.54	0.26	65.46	320.41	0.17	0.17666666666666667	0.18833333333333335	-0.011666666666666686	0.8208679912270527	0.9580649787201341	N
AT1G14720|AT1G14720|1|-	3483.7	5066780	1:5066525-5067310	105.72	143.01	0.43	107.18	173.02	0.38	104.44	170.34	0.38	66.79	164.95	0.29	108.04	120.63	0.47	102.00	133.49	0.43	151.53	205.07	0.42	205.36	261.75	0.44	201.96	254.63	0.44	222.97	298.03	0.43	246.96	159.40	0.61	277.86	247.46	0.53	0.39666666666666667	0.47833333333333333	-0.08166666666666667	0.04742790601740262	0.1131650787754254	N
AT1G14730|AT1G14730|1|+	379.4	5074604	1:5074308-5074798	36.05	89.04	0.29	29.15	54.67	0.35	34.65	70.77	0.33	15.91	64.21	0.20	27.48	93.42	0.23	23.79	81.40	0.23	23.26	53.61	0.30	21.03	90.82	0.19	20.37	61.71	0.25	30.18	60.05	0.33	41.82	43.15	0.49	33.70	42.42	0.44	0.27166666666666667	0.3333333333333333	-0.06166666666666665	0.42176819592340087	0.612109035035904	N
AT1G14740|AT1G14740|1|-	4124.8	5075408	1:5075179-5075925	85.57	156.15	0.35	83.44	108.99	0.43	92.43	214.20	0.30	97.07	154.80	0.39	68.25	158.93	0.30	108.40	118.62	0.48	116.35	208.73	0.36	156.05	149.85	0.51	79.72	251.19	0.24	197.59	252.38	0.44	168.53	192.01	0.47	181.90	239.84	0.43	0.375	0.40833333333333327	-0.03333333333333327	0.35010035922377825	0.5369574424458534	N
AT1G14790|AT1G14790|1|-	462.6	5094879	1:5094152-5095129	60.37	0.00	1.00	61.17	2.49	0.96	66.11	0.00	1.00	56.23	3.56	0.94	59.00	0.00	1.00	49.29	18.76	0.72	35.88	9.56	0.79	44.47	13.88	0.76	47.43	0.00	1.00	41.77	0.00	1.00	30.74	8.50	0.78	59.69	0.00	1.00	0.9366666666666666	0.8883333333333333	0.04833333333333334	0.49984371769335106	0.6861371767811617	N
AT1G14820|AT1G14820|1|-	397.6	5105191	1:5104975-5105398	25.19	70.69	0.26	20.33	67.16	0.23	13.25	62.38	0.18	13.28	42.18	0.24	15.01	58.01	0.21	9.00	69.74	0.11	15.04	77.91	0.16	28.17	84.97	0.25	17.56	92.40	0.16	36.19	114.94	0.24	23.70	122.30	0.16	39.89	110.08	0.27	0.205	0.2066666666666667	-0.0016666666666667052	1.0	1.0	N
AT1G14830|AT1G14830|1|-	2772.5	5107623	1:5107416-5107824	99.80	115.05	0.46	88.21	101.89	0.46	90.62	79.23	0.53	54.59	157.75	0.26	81.34	84.43	0.49	55.30	152.22	0.27	126.57	136.26	0.48	148.06	115.43	0.56	102.04	169.48	0.38	148.63	143.12	0.51	114.88	274.58	0.29	134.13	207.78	0.39	0.4116666666666667	0.435	-0.023333333333333317	0.641911649405692	0.8149579736992925	N
AT1G14840|AT1G14840|1|-	1327.2	5112143	1:5111701-5112454	10.61	102.13	0.09	14.90	101.62	0.13	7.76	104.53	0.07	3.09	92.06	0.03	9.60	104.50	0.08	13.11	77.89	0.14	6.94	143.39	0.05	15.71	184.55	0.08	22.33	158.30	0.12	2.94	139.30	0.02	22.23	211.75	0.10	20.15	133.72	0.13	0.09000000000000001	0.08333333333333333	0.006666666666666682	1.0	1.0	N
AT1G14850|AT1G14850|1|-	407.5	5116758	1:5116523-5117029	16.44	54.50	0.23	9.68	56.81	0.15	9.01	58.40	0.13	9.86	66.86	0.13	12.26	63.15	0.16	6.48	41.18	0.14	14.95	78.75	0.16	31.47	76.89	0.29	21.95	53.30	0.29	12.67	56.33	0.18	17.51	76.09	0.19	19.64	43.69	0.31	0.15666666666666668	0.23666666666666666	-0.07999999999999999	0.2989430075869679	0.47917329696168925	N
AT1G14860|AT1G14860|1|+	182.4	5125826	1:5125536-5126280	23.12	29.34	0.44	50.30	6.82	0.88	30.33	40.78	0.43	41.69	8.68	0.83	17.08	37.92	0.31	35.34	61.27	0.37	30.09	22.05	0.58	23.70	10.32	0.70	21.61	10.70	0.67	34.30	2.20	0.94	25.75	21.33	0.55	39.98	22.70	0.64	0.5433333333333333	0.6799999999999998	-0.1366666666666665	0.1137769966887946	0.22657355031995027	N
AT1G14870|AT1G14870|1|-	4283.3	5128789	1:5128344-5129002	85.35	135.61	0.39	103.58	200.19	0.34	106.64	206.23	0.34	117.14	204.62	0.36	100.73	238.75	0.30	124.26	232.93	0.35	60.93	137.23	0.31	55.99	51.44	0.52	41.18	86.14	0.32	63.89	97.56	0.40	50.17	83.52	0.38	54.99	69.94	0.44	0.3466666666666667	0.395	-0.04833333333333334	0.4575668840537458	0.6471845736567788	N
AT1G14900|AT1G14900|1|-	7594.2	5138721	1:5138116-5139195	132.99	261.48	0.34	105.77	265.51	0.28	128.40	299.26	0.30	82.58	244.47	0.25	106.43	278.70	0.28	94.08	280.13	0.25	139.22	271.22	0.34	158.71	280.36	0.36	119.12	375.44	0.24	152.38	287.15	0.35	185.59	321.29	0.37	161.87	268.05	0.38	0.2833333333333334	0.34	-0.05666666666666664	0.1153812096613844	0.22912531582837267	N
AT1G14910|AT1G14910|1|-	1108.8	5139980	1:5139712-5140665	110.14	42.38	0.72	96.32	60.00	0.62	80.88	92.27	0.47	60.67	49.83	0.55	56.92	70.90	0.45	89.21	55.97	0.61	123.63	40.96	0.75	123.37	20.72	0.86	139.11	15.05	0.90	107.18	20.80	0.84	148.49	0.00	1.00	126.01	18.87	0.87	0.57	0.87	-0.30000000000000004	1.8678359468307565e-08	2.0577256988533514e-07	N
AT1G14990|AT1G14990|1|-	293.0	5167203	1:5166913-5167404	4.12	52.44	0.07	2.67	52.98	0.05	3.36	43.21	0.07	0.48	38.07	0.01	1.81	46.54	0.04	5.81	64.68	0.08	3.90	47.68	0.08	13.51	78.42	0.15	3.82	90.30	0.04	2.43	58.47	0.04	10.07	74.60	0.12	3.98	53.81	0.07	0.05333333333333334	0.08333333333333333	-0.029999999999999992	0.734054345673812	0.8899826784969094	N
AT1G15100|AT1G15100|1|-	3358.4	5193618	1:5193284-5194214	10.74	210.87	0.05	23.19	212.47	0.10	10.19	140.80	0.07	18.59	204.23	0.08	14.98	203.70	0.07	11.06	209.92	0.05	10.59	95.36	0.10	7.71	118.39	0.06	12.59	108.99	0.10	7.93	106.36	0.07	7.01	120.66	0.05	9.20	89.49	0.09	0.07	0.07833333333333332	-0.008333333333333318	0.8214533465875913	0.9582979461189123	N
AT1G15110|AT1G15110|1|+	588.7	5201982	1:5201781-5202315	7.37	51.52	0.13	11.37	60.11	0.16	13.31	50.69	0.21	5.02	37.27	0.12	10.53	48.23	0.18	6.20	62.49	0.09	5.59	55.73	0.09	11.21	36.58	0.23	12.97	41.77	0.24	6.26	66.48	0.09	0.90	60.38	0.01	7.78	73.43	0.10	0.14833333333333334	0.12666666666666668	0.021666666666666667	0.786393816095103	0.9306175241797114	N
AT1G15120|AT1G15120|1|+	31011.5	5204068	1:5203828-5204494	11.15	271.33	0.04	15.04	259.59	0.05	14.80	301.55	0.05	9.49	214.12	0.04	13.40	264.19	0.05	11.82	310.45	0.04	22.51	544.12	0.04	46.80	707.63	0.06	33.28	612.40	0.05	24.74	611.40	0.04	41.86	766.76	0.05	39.97	632.97	0.06	0.045000000000000005	0.05000000000000001	-0.0050000000000000044	0.7405447420156853	0.8944565915975401	N
AT1G15130|AT1G15130|1|-	1373.2	5206258	1:5206002-5206687	117.59	114.96	0.51	82.15	138.27	0.37	90.84	169.22	0.35	91.63	186.94	0.33	116.01	116.67	0.50	108.11	160.44	0.40	169.13	105.00	0.62	214.59	7.56	0.97	151.66	81.75	0.65	145.94	64.44	0.69	180.51	1.05	0.99	199.76	0.06	1.00	0.41	0.82	-0.41	1.156904917186037e-18	3.769234151500869e-17	N
AT1G15140|AT1G15140|1|-	26158.0	5210548	1:5210181-5210809	137.80	42.46	0.76	151.63	22.26	0.87	117.57	13.81	0.89	101.52	36.39	0.74	140.90	21.06	0.87	144.00	30.21	0.83	241.82	54.80	0.82	339.93	0.00	1.00	261.96	15.56	0.94	221.34	50.74	0.81	289.76	14.84	0.95	240.11	42.58	0.85	0.8266666666666667	0.8949999999999999	-0.06833333333333325	0.03576023086423687	0.0891493763416763	N
AT1G15175|AT1G15175|1|-	311.8	5223346	1:5222973-5223652	7.68	27.27	0.22	7.25	41.20	0.15	4.54	41.95	0.10	NA	NA	NA	11.54	30.40	0.28	11.32	38.42	0.23	30.80	68.92	0.31	28.13	81.73	0.26	38.85	58.33	0.40	34.68	64.96	0.35	48.34	101.78	0.32	17.65	88.55	0.17	0.196	0.3016666666666667	-0.10566666666666669	0.2225128730759515	0.3830752632979435	N
AT1G15180|AT1G15180|1|+	16213.6	5226688	1:5226487-5226778	3.78	110.82	0.03	3.03	110.96	0.03	3.35	101.06	0.03	7.28	96.45	0.07	6.07	105.96	0.05	0.00	90.04	0.00	3.12	170.54	0.02	11.56	216.26	0.05	16.30	240.47	0.06	0.44	234.12	0.00	5.65	255.38	0.02	10.20	264.44	0.04	0.035	0.03166666666666667	0.003333333333333334	1.0	1.0	N
AT1G15200|AT1G15200|1|-	2995.0	5228487	1:5228300-5228881	200.34	105.35	0.66	209.55	82.36	0.72	233.72	93.33	0.71	135.11	137.19	0.50	142.95	145.85	0.49	192.75	152.14	0.56	204.43	131.80	0.61	245.15	99.97	0.71	196.25	147.08	0.57	259.29	135.69	0.66	320.72	63.89	0.83	293.62	100.32	0.75	0.6066666666666667	0.6883333333333334	-0.08166666666666667	0.027723356421537997	0.07209813995310732	N
AT1G15230|AT1G15230|1|-	9989.8	5242565	1:5242073-5243262	18.10	267.01	0.06	18.80	248.51	0.07	22.90	223.44	0.09	21.83	203.38	0.10	15.02	275.15	0.05	16.42	246.96	0.06	20.79	194.10	0.10	47.70	214.73	0.18	45.32	246.92	0.16	54.77	251.32	0.18	20.14	299.48	0.06	57.23	246.49	0.19	0.07166666666666667	0.14500000000000002	-0.07333333333333335	0.007815909609664624	0.0248772241483784	N
AT1G15240|AT1G15240|1|+	7269.7	5248503	1:5248302-5248664	115.25	0.00	1.00	84.93	0.00	1.00	103.61	0.00	1.00	98.73	0.00	1.00	144.66	0.00	1.00	96.07	0.00	1.00	112.36	0.00	1.00	219.09	0.00	1.00	140.63	0.00	1.00	176.36	0.00	1.00	199.02	0.00	1.00	220.43	0.00	1.00	1.0	1.0	0.0	1.0	1.0	N
AT1G15260|AT1G15260|1|+	18775.9	5250345	1:5249760-5250573	339.45	97.77	0.78	334.14	64.63	0.84	303.58	57.20	0.84	288.69	127.50	0.69	345.30	60.01	0.85	406.27	9.42	0.98	242.60	58.77	0.80	362.77	0.00	1.00	367.23	0.00	1.00	287.96	0.00	1.00	393.01	0.00	1.00	301.17	0.00	1.00	0.8300000000000001	0.9666666666666667	-0.1366666666666666	3.2056128382894504e-11	5.317892282818409e-10	N
AT1G15280|AT1G15280|1|+	2007.8	5256620	1:5256419-5256863	24.89	102.15	0.20	38.74	119.82	0.24	18.14	91.07	0.17	16.48	109.04	0.13	20.26	82.34	0.20	17.13	130.04	0.12	17.12	130.93	0.12	29.82	121.19	0.20	29.77	127.13	0.19	28.38	162.31	0.15	40.40	124.62	0.24	30.07	121.49	0.20	0.17666666666666667	0.18333333333333335	-0.006666666666666682	0.8778843756228006	0.9921001979487968	N
AT1G15290|AT1G15290|1|-	18674.6	5258583	1:5256870-5258784	552.23	0.00	1.00	508.49	0.00	1.00	549.30	0.00	1.00	490.52	0.00	1.00	496.89	0.00	1.00	486.20	0.00	1.00	536.03	0.00	1.00	438.90	0.00	1.00	521.82	0.00	1.00	483.46	0.00	1.00	484.15	0.00	1.00	457.37	0.00	1.00	1.0	1.0	0.0	1.0	1.0	N
AT1G15340|AT1G15340|1|-	85119.2	5276000	1:5275616-5276986	909.30	81.75	0.92	845.61	164.84	0.84	824.24	240.02	0.77	691.90	187.36	0.79	824.23	165.69	0.83	739.74	90.24	0.89	1087.90	134.88	0.89	1181.80	58.64	0.95	1362.68	19.69	0.99	1308.70	13.55	0.99	1282.27	0.00	1.00	1151.47	102.42	0.92	0.84	0.9566666666666667	-0.1166666666666667	1.0770553290232295e-21	4.2741761917103987e-20	N
AT1G15350|AT1G15350|1|-	2289.3	5278333	1:5278027-5278534	43.55	191.42	0.19	34.66	214.20	0.14	44.12	199.30	0.18	17.33	159.70	0.10	32.56	181.18	0.15	27.94	189.21	0.13	24.68	222.83	0.10	27.64	279.58	0.09	37.06	216.42	0.15	37.67	233.13	0.14	28.72	305.92	0.09	38.55	326.19	0.11	0.14833333333333334	0.11333333333333333	0.03500000000000002	0.18159654147801063	0.32661082944198944	N
AT1G15370|AT1G15370|1|+	3935.5	5288431	1:5288179-5288640	97.70	164.22	0.37	70.33	238.91	0.23	81.13	217.77	0.27	53.02	214.48	0.20	61.27	158.16	0.28	70.79	208.40	0.25	123.43	279.00	0.31	164.18	302.26	0.35	136.02	250.66	0.35	114.02	308.67	0.27	144.85	270.66	0.35	206.73	275.11	0.43	0.26666666666666666	0.3433333333333333	-0.07666666666666666	0.02979675921443924	0.07656850176205915	N
AT1G15380|AT1G15380|1|+	3993.4	5292255	1:5292024-5292582	104.92	137.65	0.43	122.23	193.36	0.39	130.11	250.93	0.34	113.69	176.65	0.39	112.92	198.43	0.36	128.44	226.88	0.36	135.46	161.09	0.46	145.39	108.34	0.57	120.27	101.05	0.54	143.99	159.28	0.47	164.88	93.52	0.64	199.37	167.72	0.54	0.37833333333333335	0.5366666666666667	-0.15833333333333338	0.00010457329244099425	0.000568771103988046	N
AT1G15390|AT1G15390|1|+	2941.9	5295615	1:5295317-5295756	60.93	118.11	0.34	73.39	95.23	0.44	59.06	112.77	0.34	44.34	82.62	0.35	64.94	125.07	0.34	53.12	139.77	0.28	65.98	138.69	0.32	89.37	242.96	0.27	63.17	195.39	0.24	121.23	152.17	0.44	156.33	152.90	0.51	76.14	208.12	0.27	0.3483333333333334	0.3416666666666666	0.006666666666666765	1.0	1.0	N
AT1G15405|AT1G15405|1|-	3560.5	5297965	1:5297875-5298166	225.49	52.14	0.81	112.02	3.59	0.97	55.06	45.99	0.54	24.03	14.72	0.62	284.29	0.00	1.00	59.12	52.63	0.53	66.56	5.92	0.92	63.21	37.69	0.63	75.72	0.00	1.00	154.70	54.70	0.74	85.16	0.00	1.00	62.45	48.43	0.56	0.7450000000000001	0.8083333333333332	-0.06333333333333313	0.43511120496409605	0.6258069248412538	N
AT1G15410|AT1G15410|1|+	192.1	5300607	1:5300406-5300742	105.31	0.00	1.00	92.12	2.61	0.97	84.22	8.38	0.91	80.23	23.59	0.77	77.53	0.00	1.00	68.63	10.76	0.86	83.23	12.26	0.87	99.84	0.00	1.00	113.02	30.36	0.79	76.90	51.25	0.60	79.05	8.69	0.90	117.86	15.05	0.89	0.9183333333333334	0.8416666666666667	0.07666666666666677	0.05920699166904147	0.1354869081897249	N
AT1G15420|AT1G15420|1|-	593.1	5301753	1:5301516-5301979	18.08	72.65	0.20	30.48	101.74	0.23	27.84	97.91	0.22	16.89	116.83	0.13	26.20	73.40	0.26	6.47	119.16	0.05	36.90	84.42	0.30	37.12	124.00	0.23	50.56	123.25	0.29	35.82	127.97	0.22	31.34	153.60	0.17	43.46	126.03	0.26	0.18166666666666667	0.245	-0.06333333333333332	0.18346314264164998	0.3292528893679025	N
AT1G15470|AT1G15470|1|+	596.9	5317700	1:5317250-5317941	18.77	35.53	0.35	20.75	28.02	0.43	26.80	10.11	0.73	17.50	28.20	0.38	29.70	14.50	0.67	6.94	35.98	0.16	28.09	26.12	0.52	23.65	48.18	0.33	38.44	14.99	0.72	39.79	15.19	0.72	48.10	0.00	1.00	35.27	18.21	0.66	0.45333333333333337	0.6583333333333333	-0.20499999999999996	0.06990148704930639	0.15487426461738185	N
AT1G15500|AT1G15500|1|+	11380.2	5328679	1:5328359-5328875	388.40	566.21	0.41	381.54	535.00	0.42	335.06	556.22	0.38	390.84	426.09	0.48	353.73	489.36	0.42	341.69	439.06	0.44	408.19	446.34	0.48	552.60	379.30	0.59	495.51	438.81	0.53	558.26	283.73	0.66	863.54	161.61	0.84	592.94	321.34	0.65	0.425	0.6249999999999999	-0.1999999999999999	7.920491335550995e-19	2.6323050970357937e-17	N
AT1G15690|AT1G15690|1|+	322113.9	5402355	1:5401979-5402569	465.82	722.12	0.39	487.78	675.30	0.42	421.19	759.92	0.36	310.61	705.93	0.31	447.39	714.94	0.38	349.16	762.65	0.31	979.88	1047.58	0.48	1557.16	1219.62	0.56	1249.63	1389.98	0.47	1195.40	1656.97	0.42	1191.22	1536.32	0.44	1326.27	1298.41	0.51	0.36166666666666664	0.48	-0.11833333333333335	5.5055453240665234e-11	8.753376621639847e-10	N
AT1G15740|AT1G15740|1|+	7110.8	5414561	1:5414360-5414817	435.55	233.04	0.65	392.53	214.79	0.65	446.02	319.23	0.58	265.05	240.12	0.52	371.14	228.97	0.62	461.55	360.76	0.56	553.98	346.60	0.62	669.79	245.63	0.73	461.44	670.91	0.41	611.07	393.16	0.61	514.31	341.22	0.60	667.76	347.41	0.66	0.5966666666666667	0.6050000000000001	-0.008333333333333415	1.0	1.0	N
AT1G15750|AT1G15750|1|-	5598.6	5415067	1:5414919-5415299	285.15	324.33	0.47	244.30	287.51	0.46	229.89	309.83	0.43	212.02	270.93	0.44	181.27	335.94	0.35	284.55	292.09	0.49	315.69	292.67	0.52	362.68	207.18	0.64	336.97	336.86	0.50	366.53	330.55	0.53	337.88	272.40	0.55	382.13	360.43	0.51	0.43999999999999995	0.5416666666666666	-0.10166666666666668	0.0009084409733829937	0.0038561204410537415	N
AT1G15780|AT1G15780|1|-	5559.1	5430351	1:5430040-5430911	29.63	77.99	0.28	24.33	90.25	0.21	25.23	84.21	0.23	9.76	109.33	0.08	14.79	87.43	0.14	16.07	108.85	0.13	17.83	86.69	0.17	66.40	101.63	0.40	25.83	110.13	0.19	26.91	93.26	0.22	40.61	114.46	0.26	27.87	97.97	0.22	0.17833333333333332	0.24333333333333332	-0.065	0.12146759240062022	0.23906188664784375	N
AT1G15800|AT1G15800|1|-	163.5	5441325	1:5441072-5441526	20.21	18.00	0.53	37.00	6.68	0.85	43.56	6.03	0.88	19.58	28.54	0.41	20.47	19.09	0.52	7.74	32.44	0.19	40.38	18.43	0.69	63.85	0.00	1.00	49.39	15.79	0.76	42.17	48.98	0.46	38.29	7.63	0.83	47.77	60.26	0.44	0.5633333333333334	0.6966666666666668	-0.13333333333333341	0.43054956132342426	0.6214046464590947	N
AT1G15810|AT1G15810|1|+	561.5	5446329	1:5446128-5446462	167.33	8.09	0.95	119.13	36.51	0.77	111.42	26.38	0.81	110.75	34.76	0.76	100.90	58.09	0.63	117.96	32.66	0.78	196.40	0.00	1.00	171.09	23.20	0.88	149.29	0.00	1.00	174.46	12.16	0.93	139.92	1.78	0.99	142.43	13.23	0.92	0.7833333333333333	0.9533333333333333	-0.16999999999999993	1.2804852722803547e-05	8.454606080166035e-05	N
AT1G15820|AT1G15820|1|-	16655878.9	5446748	1:5446564-5447212	20754.22	11261.93	0.65	21233.47	12998.88	0.62	19122.31	11885.64	0.62	18837.48	12160.16	0.61	20458.95	12403.13	0.62	20237.12	12667.91	0.62	21599.59	10522.33	0.67	29635.70	10917.83	0.73	26390.29	13112.45	0.67	24890.56	10792.31	0.70	32223.14	9617.85	0.77	28045.89	10469.84	0.73	0.6233333333333334	0.7116666666666666	-0.08833333333333315	6.554599905603982e-146	2.8318721418255118e-143	N
AT1G15825|AT1G15825|1|-	1578.4	5448387	1:5448073-5448608	106.65	132.94	0.45	73.25	145.45	0.33	105.98	141.96	0.43	106.89	112.79	0.49	100.58	126.39	0.44	72.55	49.14	0.60	121.98	116.19	0.51	61.01	109.61	0.36	89.85	123.77	0.42	73.99	116.98	0.39	59.95	78.53	0.43	94.84	46.20	0.67	0.4566666666666667	0.4633333333333334	-0.006666666666666654	0.8388519379484032	0.9697616514770869	N
AT1G15830|AT1G15830|1|+	1971.2	5448885	1:5448611-5450617	101.62	124.57	0.45	101.73	94.36	0.52	117.60	115.80	0.50	110.35	49.53	0.69	94.17	64.77	0.59	104.81	77.85	0.57	112.24	61.57	0.65	99.53	17.00	0.85	110.91	78.60	0.59	90.98	10.93	0.89	90.46	73.22	0.55	86.62	43.96	0.66	0.5533333333333333	0.6983333333333334	-0.14500000000000002	0.018410294661729255	0.05104439119799208	N
AT1G15860|AT1G15860|1|+	5557.4	5456847	1:5456646-5457022	42.58	152.48	0.22	30.78	171.75	0.15	38.88	143.06	0.21	43.91	185.04	0.19	38.62	198.48	0.16	39.17	202.20	0.16	56.18	206.96	0.21	91.26	288.45	0.24	28.70	309.43	0.08	58.28	271.42	0.18	78.74	272.89	0.22	39.97	361.16	0.10	0.18166666666666667	0.17166666666666666	0.010000000000000009	0.8177439624409683	0.955953791719255	N
AT1G15880|AT1G15880|1|-	3320.0	5458630	1:5458429-5458831	31.22	113.40	0.22	33.23	145.26	0.19	29.72	152.76	0.16	22.45	140.29	0.14	40.52	122.75	0.25	24.17	129.87	0.16	86.09	152.68	0.36	66.18	192.78	0.26	60.81	226.18	0.21	59.70	193.68	0.24	60.40	264.58	0.19	121.28	197.59	0.38	0.18666666666666668	0.27333333333333326	-0.08666666666666659	0.04890780851263832	0.11593437337549783	N
AT1G15885|AT1G15885|1|+	1244.5	5461171	1:5460970-5461297	20.31	56.78	0.26	35.78	20.70	0.63	27.39	45.78	0.37	11.99	49.87	0.19	20.07	33.13	0.38	16.31	74.37	0.18	41.08	39.08	0.51	59.22	77.15	0.43	43.44	48.30	0.47	83.64	50.09	0.63	66.04	52.53	0.56	42.40	82.70	0.34	0.335	0.49	-0.15499999999999997	0.02879008211061085	0.07428902776762919	N
AT1G15910|AT1G15910|1|+	663.0	5468745	1:5468493-5469180	50.85	36.62	0.58	54.97	61.37	0.47	53.26	51.69	0.51	27.53	58.47	0.32	45.57	60.26	0.43	57.49	25.72	0.69	81.02	38.92	0.68	107.61	96.19	0.53	101.47	100.56	0.50	150.29	39.85	0.79	119.48	44.57	0.73	163.72	7.97	0.95	0.5	0.6966666666666667	-0.19666666666666666	0.001776084907429613	0.006951144436836575	N
AT1G15930|AT1G15930|1|+	342388.4	5472883	1:5472682-5473048	168.05	1445.14	0.10	191.49	1418.79	0.12	146.46	1292.26	0.10	139.16	1147.77	0.11	133.32	1285.50	0.09	138.34	1319.61	0.09	170.64	1511.23	0.10	280.51	2081.80	0.12	187.56	1676.79	0.10	205.45	1680.53	0.11	280.10	2113.75	0.12	234.08	1778.63	0.12	0.10166666666666667	0.11166666666666668	-0.010000000000000009	0.47373935842984277	0.6617879154829999	N
AT1G15940|AT1G15940|1|+	1908.8	5478036	1:5477090-5478405	128.57	85.87	0.60	111.69	93.25	0.54	115.25	75.42	0.60	104.54	111.76	0.48	111.44	84.32	0.57	101.10	107.85	0.48	94.19	52.58	0.64	143.09	9.37	0.94	181.87	0.00	1.00	141.35	0.00	1.00	157.73	0.00	1.00	125.65	13.08	0.91	0.545	0.915	-0.37	1.2759483222593582e-15	3.3191357273013725e-14	N
AT1G15960|AT1G15960|1|-	177.4	5482275	1:5482180-5482519	60.40	0.00	1.00	34.06	3.45	0.91	18.92	11.81	0.62	37.17	25.57	0.59	22.48	13.02	0.63	27.38	8.94	0.75	49.30	4.77	0.91	29.03	19.45	0.60	52.60	21.57	0.71	36.05	9.72	0.79	73.23	5.71	0.93	65.46	0.00	1.00	0.75	0.8233333333333333	-0.07333333333333325	0.45459048930458	0.644127433654586	N
AT1G15970|AT1G15970|1|-	301.1	5486576	1:5486273-5486855	39.56	35.49	0.53	37.82	63.07	0.37	36.42	38.55	0.49	31.28	40.90	0.43	30.08	47.28	0.39	27.78	57.22	0.33	80.39	4.66	0.95	100.84	11.45	0.90	94.85	6.79	0.93	56.63	37.10	0.60	65.54	34.80	0.65	45.07	58.11	0.44	0.42333333333333334	0.7450000000000001	-0.32166666666666677	8.052753272987433e-06	5.619396718657031e-05	N
AT1G16000|AT1G16000|1|+	2307.6	5495259	1:5495058-5495359	47.26	71.78	0.40	43.69	81.51	0.35	59.83	49.66	0.55	27.64	92.55	0.23	51.32	70.94	0.42	24.29	101.18	0.19	31.15	75.37	0.29	38.46	114.53	0.25	17.60	107.97	0.14	44.51	82.52	0.35	61.38	127.94	0.32	22.64	81.40	0.22	0.3566666666666667	0.26166666666666666	0.09500000000000003	0.13350000422358904	0.2572405549679667	N
AT1G16010|AT1G16010|1|-	420.9	5495491	1:5495373-5495692	135.74	35.12	0.79	112.66	37.74	0.75	111.94	45.86	0.71	160.77	29.50	0.84	112.70	63.09	0.64	155.27	40.41	0.79	163.22	24.01	0.87	214.37	0.00	1.00	166.56	0.00	1.00	143.52	73.71	0.66	151.20	45.92	0.77	220.29	41.92	0.84	0.7533333333333333	0.8566666666666668	-0.1033333333333335	0.024656538160542682	0.06531912015497537	N
AT1G16020|AT1G16020|1|+	377.1	5501189	1:5500988-5501317	25.47	63.90	0.28	18.51	53.26	0.26	21.70	61.92	0.26	21.16	63.77	0.25	16.82	84.98	0.17	28.67	48.32	0.37	53.85	73.30	0.42	60.56	43.67	0.58	60.79	53.53	0.53	28.74	102.29	0.22	56.71	90.40	0.39	51.56	136.03	0.27	0.26499999999999996	0.40166666666666667	-0.13666666666666671	0.07767882636290305	0.16857272277094726	N
AT1G16040|AT1G16040|1|+	169.4	5506559	1:5506349-5507059	3.42	44.94	0.07	4.05	64.08	0.06	1.34	46.13	0.03	1.83	39.58	0.04	2.31	70.22	0.03	2.32	71.14	0.03	2.28	87.87	0.03	9.07	148.65	0.06	6.41	86.06	0.07	3.08	82.68	0.04	4.03	122.11	0.03	4.48	119.63	0.04	0.043333333333333335	0.045000000000000005	-0.0016666666666666705	1.0	1.0	N
AT1G16080|AT1G16080|1|+	12253.3	5515854	1:5515648-5516027	124.78	350.96	0.26	143.60	399.04	0.26	83.99	287.12	0.23	112.93	351.02	0.24	165.82	345.21	0.32	111.03	345.61	0.24	224.58	381.55	0.37	343.29	615.69	0.36	326.77	437.05	0.43	274.61	526.57	0.34	368.67	546.20	0.40	301.46	437.95	0.41	0.25833333333333336	0.385	-0.12666666666666665	9.21803689069833e-06	6.304172923803806e-05	N
AT1G16170|AT1G16170|1|-	4395.5	5538840	1:5538666-5539173	44.29	90.26	0.33	70.55	73.71	0.49	60.41	117.61	0.34	46.62	107.73	0.30	55.41	78.74	0.41	57.50	101.53	0.36	109.58	205.74	0.35	122.25	329.57	0.27	163.87	300.57	0.35	170.53	238.00	0.42	156.22	277.14	0.36	237.56	218.96	0.52	0.37166666666666665	0.37833333333333335	-0.00666666666666671	0.844506252375698	0.9733412649892337	N
AT1G16180|AT1G16180|1|+	52430.8	5542671	1:5542384-5542902	214.13	373.25	0.36	220.79	347.37	0.39	196.47	409.50	0.32	197.32	388.80	0.34	192.35	414.25	0.32	237.00	420.91	0.36	285.18	500.75	0.36	545.31	389.27	0.58	381.78	718.18	0.35	417.36	427.78	0.49	549.60	248.25	0.69	470.84	510.81	0.48	0.3483333333333334	0.49166666666666664	-0.14333333333333326	1.0346791715198945e-07	1.0149661330101867e-06	N
AT1G16190|AT1G16190|1|+	608.9	5545977	1:5545776-5546099	24.01	48.56	0.33	25.14	53.39	0.32	37.02	42.13	0.47	26.81	32.31	0.45	24.48	82.00	0.23	41.11	67.17	0.38	42.43	80.71	0.34	72.60	63.88	0.53	27.93	77.58	0.26	57.99	33.86	0.63	79.11	89.15	0.47	41.48	63.33	0.40	0.36333333333333334	0.4383333333333334	-0.07500000000000007	0.24527885010374076	0.4137398968924159	N
AT1G16240|AT1G16240|1|-	5753.6	5555073	1:5554843-5555314	36.02	208.88	0.15	37.12	196.40	0.16	32.01	267.09	0.11	24.64	149.91	0.14	26.01	210.85	0.11	25.37	218.12	0.10	49.40	399.02	0.11	82.54	425.24	0.16	41.93	319.93	0.12	53.57	397.18	0.12	55.50	372.89	0.13	47.11	473.11	0.09	0.12833333333333333	0.12166666666666666	0.006666666666666668	0.9031922036109921	1.0	N
AT1G16250|AT1G16250|1|+	413.0	5558702	1:5558124-5559498	12.64	62.35	0.17	15.05	55.91	0.21	15.82	70.04	0.18	6.68	47.53	0.12	13.52	63.43	0.18	15.94	55.44	0.22	17.62	77.62	0.18	33.82	80.76	0.30	22.77	95.16	0.19	22.85	71.52	0.24	32.29	88.37	0.27	36.67	64.12	0.36	0.18000000000000002	0.25666666666666665	-0.07666666666666663	0.27616049247899577	0.4519444686699244	N
AT1G16260|AT1G16260|1|-	669.8	5560714	1:5559520-5560915	74.77	8.14	0.90	68.77	0.00	1.00	93.18	0.00	1.00	69.03	8.44	0.89	59.15	0.00	1.00	81.54	0.00	1.00	82.68	0.00	1.00	70.16	0.00	1.00	84.85	0.00	1.00	73.91	0.00	1.00	62.60	0.00	1.00	85.74	0.00	1.00	0.965	1.0	-0.03500000000000003	0.4966887417218537	0.6836005576856039	N
AT1G16320|AT1G16320|1|+	4858.7	5581906	1:5581443-5582154	398.48	200.30	0.67	430.26	226.96	0.65	358.63	243.67	0.60	389.96	282.03	0.58	380.49	307.84	0.55	372.69	197.89	0.65	369.79	156.34	0.70	514.00	0.00	1.00	442.65	101.08	0.81	381.98	140.25	0.73	532.64	0.00	1.00	458.09	0.00	1.00	0.6166666666666666	0.8733333333333334	-0.2566666666666668	1.7762254133989238e-23	8.171459228215326e-22	N
AT1G16340|AT1G16340|1|-	666.7	5587821	1:5587722-5588022	6.65	45.65	0.13	6.44	31.44	0.17	4.23	41.17	0.09	6.61	47.57	0.12	NA	NA	NA	0.00	30.45	0.00	4.51	44.69	0.09	12.09	56.16	0.18	NA	NA	NA	18.11	37.40	0.33	4.12	63.28	0.06	7.88	45.04	0.15	0.10200000000000001	0.16200000000000003	-0.060000000000000026	0.549299420158587	0.7318836602461625	N
AT1G16350|AT1G16350|1|+	3333.8	5593002	1:5592801-5593098	14.51	184.33	0.07	2.72	206.53	0.01	7.96	152.15	0.05	6.43	153.50	0.04	2.01	143.49	0.01	14.60	143.30	0.09	18.78	127.09	0.13	13.39	182.55	0.07	21.86	153.32	0.12	11.54	92.53	0.11	27.76	208.13	0.12	15.62	189.94	0.08	0.045000000000000005	0.105	-0.05999999999999999	0.06547100333930209	0.14704484225354694	N
AT1G16400|AT1G16400|1|+	702.8	5607292	1:5606911-5607498	79.87	23.07	0.78	43.98	57.35	0.43	73.29	40.99	0.64	29.04	40.26	0.42	80.19	0.03	1.00	39.85	70.30	0.36	64.23	0.00	1.00	59.03	17.20	0.77	73.77	9.27	0.89	117.48	0.00	1.00	115.28	0.00	1.00	70.64	9.72	0.88	0.605	0.9233333333333333	-0.31833333333333336	8.013594954177144e-08	8.011176364150732e-07	N
AT1G16410|AT1G16410|1|+	98800.8	5610218	1:5609945-5612064	313.86	898.94	0.26	303.83	907.21	0.25	244.04	814.38	0.23	255.84	844.97	0.23	248.12	736.29	0.25	359.65	1082.38	0.25	176.99	502.23	0.26	219.25	373.00	0.37	247.03	553.92	0.31	240.44	605.63	0.28	256.37	521.24	0.33	189.01	346.54	0.35	0.245	0.31666666666666665	-0.07166666666666666	0.0015398205308625058	0.006154946345607691	N
AT1G16460|AT1G16460|1|-	5171.1	5619748	1:5619545-5619949	45.06	223.76	0.17	38.86	193.64	0.17	37.67	225.74	0.14	21.67	198.31	0.10	47.37	225.66	0.17	28.35	251.75	0.10	45.61	247.04	0.16	76.86	287.88	0.21	37.02	260.33	0.12	47.33	282.28	0.14	33.29	353.40	0.09	36.38	280.03	0.11	0.1416666666666667	0.13833333333333334	0.003333333333333355	1.0	1.0	N
AT1G16470|AT1G16470|1|+	25762.7	5625592	1:5625391-5625683	14.40	240.74	0.06	26.64	219.63	0.11	9.55	223.74	0.04	9.88	188.08	0.05	14.05	224.87	0.06	11.92	222.18	0.05	21.57	250.32	0.08	10.83	398.38	0.03	13.91	356.68	0.04	25.26	314.94	0.07	20.06	412.89	0.05	17.37	419.72	0.04	0.06166666666666667	0.051666666666666666	0.010000000000000002	0.5761626905452795	0.7556194609935915	N
AT1G16540|AT1G16540|1|+	144.0	5665320	1:5665103-5665488	30.88	27.83	0.53	20.12	35.39	0.36	22.46	25.88	0.46	13.53	43.93	0.24	28.03	26.59	0.51	34.69	25.03	0.58	20.58	15.53	0.57	26.35	29.00	0.48	60.10	2.87	0.95	37.34	27.59	0.58	32.18	34.85	0.48	38.39	26.67	0.59	0.4466666666666667	0.6083333333333333	-0.16166666666666657	0.088373656724931	0.18618602502712625	N
AT1G16560|AT1G16560|1|+	857.0	5670393	1:5670045-5670577	142.90	27.23	0.84	143.45	25.80	0.85	102.07	88.65	0.54	113.19	19.75	0.85	104.13	50.15	0.67	117.50	43.36	0.73	155.43	75.63	0.67	156.58	85.41	0.65	184.87	119.12	0.61	194.13	32.39	0.86	232.87	10.91	0.96	235.63	0.00	1.00	0.7466666666666667	0.7916666666666666	-0.04499999999999993	0.3387113528617941	0.5239719788831125	N
AT1G16610|AT1G16610|1|-	8921.7	5675726	1:5675495-5676319	51.60	21.47	0.71	39.72	54.16	0.42	35.26	32.13	0.52	47.30	10.06	0.82	34.99	42.59	0.45	40.64	20.48	0.66	62.98	48.29	0.57	75.22	90.86	0.45	61.31	87.89	0.41	79.75	74.11	0.52	49.71	104.77	0.32	94.81	57.56	0.62	0.5966666666666667	0.4816666666666667	0.11499999999999999	0.1935398485311795	0.3433682333251796	N
AT1G16670|AT1G16670|1|+	271.9	5699445	1:5699097-5699870	24.85	40.89	0.38	15.89	57.12	0.22	16.72	48.48	0.26	29.98	24.10	0.55	17.21	37.03	0.32	20.58	48.38	0.30	24.27	40.80	0.37	33.13	60.43	0.35	22.05	36.46	0.38	31.59	49.59	0.39	47.21	24.19	0.66	22.74	29.94	0.43	0.3383333333333334	0.4300000000000001	-0.09166666666666673	0.28075208178443023	0.45773745292870316	N
AT1G16680|AT1G16680|1|+	1549.0	5705630	1:5705277-5705892	95.81	37.79	0.72	101.41	57.06	0.64	79.87	54.21	0.60	88.61	26.16	0.77	76.48	56.00	0.58	99.58	51.14	0.66	67.79	55.62	0.55	196.70	0.00	1.00	129.59	38.42	0.77	98.64	123.34	0.44	172.31	7.34	0.96	171.98	0.00	1.00	0.6616666666666667	0.7866666666666667	-0.125	0.0101138688735773	0.030977551025031358	N
AT1G16690|AT1G16690|1|+	126.9	5709423	1:5709162-5709563	47.75	25.16	0.65	27.67	14.16	0.66	21.63	32.80	0.40	12.41	18.50	0.40	24.46	15.11	0.62	25.00	19.72	0.56	71.63	4.10	0.95	40.50	2.58	0.94	53.64	0.00	1.00	32.64	13.88	0.70	25.66	15.52	0.62	31.50	22.56	0.58	0.5483333333333333	0.7983333333333333	-0.25	0.00755042919427875	0.024171589852947144	N
AT1G16700|AT1G16700|1|+	4511.1	5711800	1:5711599-5712043	41.00	218.18	0.16	30.15	172.74	0.15	32.28	190.91	0.14	51.41	131.54	0.28	44.58	218.65	0.17	36.16	205.47	0.15	80.13	299.69	0.21	83.25	401.69	0.17	110.04	308.33	0.26	77.72	311.99	0.20	112.28	396.48	0.22	81.10	332.72	0.20	0.17500000000000002	0.21	-0.034999999999999976	0.25798741253437374	0.43035435930066673	N
AT1G16710|AT1G16710|1|+	824.3	5722221	1:5721668-5722614	18.96	92.36	0.17	13.26	91.94	0.13	8.01	75.06	0.10	9.36	100.00	0.09	16.22	45.40	0.26	18.78	97.32	0.16	12.87	83.91	0.13	24.21	77.56	0.24	24.87	58.59	0.30	21.55	73.39	0.23	17.73	85.21	0.17	22.82	82.89	0.22	0.15166666666666667	0.21499999999999997	-0.0633333333333333	0.2624434698510294	0.43566668224351474	N
AT1G16740|AT1G16740|1|+	2500.7	5728957	1:5728756-5729057	88.23	93.94	0.48	68.16	79.78	0.46	61.09	81.29	0.43	70.47	78.70	0.47	65.53	116.55	0.36	100.97	86.59	0.54	85.97	101.53	0.46	108.33	181.10	0.37	194.23	102.37	0.65	103.97	184.40	0.36	176.03	180.83	0.49	113.16	191.68	0.37	0.4566666666666666	0.45	0.006666666666666599	1.0	1.0	N
AT1G16750|AT1G16750|1|-	239.7	5729301	1:5729115-5729532	42.54	13.20	0.76	45.14	25.05	0.64	49.04	5.07	0.91	48.90	0.00	1.00	49.79	0.00	1.00	47.68	18.12	0.72	56.57	0.00	1.00	90.32	0.00	1.00	61.61	54.49	0.53	47.20	0.00	1.00	79.18	0.00	1.00	48.69	17.64	0.73	0.8383333333333334	0.8766666666666666	-0.03833333333333322	0.8181753915991608	0.956270156001042	N
AT1G16810|AT1G16810|1|+	5456.3	5756609	1:5756408-5756835	431.82	145.40	0.75	427.00	176.17	0.71	394.02	209.05	0.65	347.45	199.00	0.64	340.51	234.06	0.59	364.58	191.93	0.66	647.50	214.00	0.75	1029.87	40.38	0.96	879.26	148.91	0.86	938.29	173.60	0.84	966.42	168.95	0.85	894.38	181.10	0.83	0.6666666666666666	0.8483333333333333	-0.18166666666666664	8.786543620804593e-18	2.7031543021651777e-16	N
AT1G16860|AT1G16860|1|+	796.3	5770192	1:5769991-5770602	91.75	68.12	0.57	84.70	73.22	0.54	83.09	101.58	0.45	64.69	64.00	0.50	69.55	58.61	0.54	76.79	93.50	0.45	105.88	53.66	0.66	104.94	68.83	0.60	118.57	73.50	0.62	83.69	36.06	0.70	119.80	96.99	0.55	144.24	44.78	0.76	0.5083333333333333	0.6483333333333333	-0.14	0.013767804085012651	0.0399466046836481	N
AT1G16870|AT1G16870|1|-	1774.8	5770874	1:5770732-5771075	39.16	79.26	0.33	53.66	26.40	0.67	40.03	41.72	0.49	42.68	39.76	0.52	84.01	7.11	0.92	30.83	58.15	0.35	35.73	78.34	0.31	91.98	91.72	0.50	72.84	92.16	0.44	82.48	47.84	0.63	53.70	90.08	0.37	120.60	39.31	0.75	0.5466666666666666	0.5	0.046666666666666634	0.7896985520340091	0.933194733209888	N
AT1G16900|AT1G16900|1|-	343.7	5779143	1:5779008-5779393	52.94	30.56	0.63	47.35	28.13	0.63	42.45	0.00	1.00	14.46	37.49	0.28	26.41	25.55	0.51	36.70	32.34	0.53	34.31	25.23	0.58	74.75	40.02	0.65	44.67	59.37	0.43	60.14	46.89	0.56	54.81	59.73	0.48	47.98	40.80	0.54	0.5966666666666667	0.5399999999999999	0.056666666666666754	0.5161088010197873	0.7006247480510419	N
AT1G16916|AT1G16916|1|-	385.9	5786694	1:5786557-5786895	22.25	43.96	0.34	24.38	35.31	0.41	28.80	46.69	0.38	46.35	75.77	0.38	31.60	67.86	0.32	37.83	53.53	0.41	46.34	50.40	0.48	61.99	68.20	0.48	25.04	75.28	0.25	64.45	106.53	0.38	54.72	114.75	0.32	82.02	104.51	0.44	0.3733333333333333	0.39166666666666666	-0.018333333333333368	0.7783442458416632	0.9247258214883556	N
AT1G16920|AT1G16920|1|-	2000.5	5787434	1:5787150-5787918	24.39	159.78	0.13	22.70	137.88	0.14	28.31	162.52	0.15	29.68	124.33	0.19	31.15	119.41	0.21	20.59	164.47	0.11	36.49	237.31	0.13	56.69	237.30	0.19	53.50	222.86	0.19	25.95	299.63	0.08	45.53	267.33	0.15	56.31	261.47	0.18	0.155	0.15333333333333332	0.0016666666666666774	1.0	1.0	N
AT1G16930|AT1G16930|1|+	89.7	5791448	1:5791247-5791752	NA	NA	NA	15.89	20.11	0.44	30.00	4.30	0.87	NA	NA	NA	30.81	0.00	1.00	8.70	25.96	0.25	34.72	18.03	0.66	34.69	15.32	0.69	NA	NA	NA	45.21	0.00	1.00	33.37	23.72	0.58	29.70	9.61	0.76	0.64	0.7380000000000001	-0.09800000000000009	0.4644688448433922	0.6532805252949453	N
AT1G16970|AT1G16970|1|-	276.9	5801035	1:5800887-5801272	26.03	24.96	0.51	25.95	14.28	0.64	11.96	36.66	0.25	10.08	24.99	0.29	9.89	63.81	0.13	14.94	53.06	0.22	32.45	54.24	0.37	58.25	27.09	0.68	108.27	6.14	0.95	32.70	77.92	0.30	42.99	51.29	0.46	43.55	65.77	0.40	0.34	0.5266666666666666	-0.1866666666666666	0.010293505693108076	0.03143410143589888	N
AT1G17020|AT1G17020|1|+	456.4	5821763	1:5821499-5822013	28.17	89.85	0.24	20.38	85.77	0.19	20.66	60.25	0.26	37.51	73.17	0.34	31.47	115.80	0.21	50.41	95.67	0.35	20.21	38.49	0.34	44.72	26.90	0.62	16.75	22.54	0.43	22.75	22.67	0.50	47.57	20.98	0.69	30.28	71.51	0.30	0.26499999999999996	0.48	-0.21500000000000002	0.005183694736009264	0.017461143929397984	N
AT1G17050|AT1G17050|1|+	2372.6	5831004	1:5830667-5831383	152.88	168.88	0.48	164.74	96.27	0.63	141.59	90.09	0.61	113.28	191.96	0.37	128.89	127.01	0.50	154.88	122.30	0.56	245.58	84.49	0.74	361.51	124.18	0.74	370.68	55.25	0.87	360.23	0.00	1.00	359.02	30.27	0.92	276.12	42.78	0.87	0.525	0.8566666666666668	-0.3316666666666668	6.060643274732003e-21	2.2812353114019665e-19	N
AT1G17100|AT1G17100|1|+	3992.5	5845311	1:5845110-5845661	523.10	182.54	0.74	518.23	178.25	0.74	397.26	191.75	0.67	530.53	101.14	0.84	484.04	247.80	0.66	423.86	272.15	0.61	307.24	143.48	0.68	378.54	87.02	0.81	417.86	0.00	1.00	332.44	42.69	0.89	412.17	48.87	0.89	290.53	34.50	0.89	0.71	0.86	-0.15000000000000002	1.642833905490619e-08	1.8383829413130947e-07	N
AT1G17110|AT1G17110|1|-	901.4	5845867	1:5845675-5846362	93.44	55.21	0.63	98.36	44.19	0.69	69.11	63.32	0.52	97.54	44.76	0.69	59.32	76.60	0.44	58.45	79.76	0.42	114.04	26.34	0.81	113.82	10.62	0.91	105.76	59.05	0.64	156.32	0.00	1.00	103.26	27.80	0.79	166.76	0.00	1.00	0.565	0.8583333333333334	-0.29333333333333345	3.755073076084145e-08	3.986555679171811e-07	N
AT1G17130|AT1G17130|1|+	912.0	5856483	1:5856267-5856573	76.55	63.19	0.55	95.27	45.11	0.68	123.68	36.51	0.77	96.75	89.09	0.52	128.12	35.23	0.78	116.83	56.96	0.67	134.48	69.24	0.66	200.55	51.75	0.79	100.78	72.33	0.58	152.95	63.60	0.71	163.51	94.68	0.63	219.90	37.87	0.85	0.6616666666666666	0.7033333333333333	-0.04166666666666663	0.26394301061574066	0.43742523290337143	N
AT1G17140|AT1G17140|1|-	1846.9	5857207	1:5856697-5857760	240.68	0.00	1.00	210.54	35.51	0.86	262.31	1.56	0.99	218.30	0.00	1.00	209.16	26.71	0.89	211.98	0.43	1.00	197.98	10.60	0.95	193.04	0.00	1.00	183.01	0.00	1.00	213.03	0.00	1.00	185.95	0.00	1.00	162.88	0.00	1.00	0.9566666666666666	0.9916666666666667	-0.03500000000000014	0.026741013225416974	0.06998299932077126	N
AT1G17145|AT1G17145|1|-	682.0	5860382	1:5860078-5860689	43.48	42.54	0.51	46.65	66.57	0.41	74.34	84.26	0.47	50.48	15.79	0.76	51.24	67.78	0.43	58.07	61.27	0.49	97.29	27.66	0.78	93.45	54.83	0.63	100.73	17.75	0.85	96.51	65.55	0.60	124.55	7.19	0.95	117.30	32.21	0.78	0.5116666666666667	0.7650000000000001	-0.2533333333333334	3.294196706132195e-05	0.00019839050102324617	N
AT1G17160|AT1G17160|1|+	2535.5	5869322	1:5869121-5869436	0.14	53.33	0.00	0.00	43.93	0.00	0.10	57.64	0.00	0.00	68.35	0.00	0.02	50.72	0.00	0.00	41.07	0.00	2.33	71.46	0.03	1.05	73.67	0.01	1.28	68.88	0.02	0.00	49.57	0.00	0.00	112.59	0.00	0.00	73.04	0.00	0.0	0.01	-0.01	1.0	1.0	N
AT1G17170|AT1G17170|1|+	3995.5	5870629	1:5870350-5870883	459.77	178.42	0.72	492.58	185.18	0.73	290.62	139.47	0.68	451.60	366.11	0.55	514.21	269.83	0.66	454.76	316.33	0.59	110.50	56.05	0.66	138.29	0.00	1.00	98.52	34.83	0.74	111.52	144.51	0.44	160.21	0.00	1.00	140.10	23.27	0.86	0.6549999999999999	0.7833333333333333	-0.1283333333333334	0.014127188474212064	0.040808683682629444	N
AT1G17180|AT1G17180|1|+	283.8	5872965	1:5872608-5873124	101.82	35.46	0.74	89.36	29.54	0.75	84.26	82.98	0.50	76.19	59.90	0.56	80.92	59.46	0.58	126.29	78.98	0.62	69.80	17.35	0.80	62.75	7.78	0.89	60.10	41.30	0.59	43.78	8.44	0.84	68.68	14.98	0.82	58.64	0.00	1.00	0.625	0.8233333333333333	-0.19833333333333325	0.00380698944303687	0.013424433674754216	N
AT1G17190|AT1G17190|1|+	429.1	5876371	1:5876031-5876620	58.29	48.37	0.55	56.51	52.54	0.52	56.29	47.35	0.54	45.43	54.39	0.46	49.06	102.14	0.32	63.36	82.70	0.43	109.98	42.02	0.72	78.23	84.34	0.48	51.53	110.25	0.32	66.91	51.66	0.56	70.84	36.86	0.66	109.84	28.68	0.79	0.47000000000000003	0.5883333333333334	-0.11833333333333335	0.05988856947672415	0.1366504511803003	N
AT1G17200|AT1G17200|1|+	10129.8	5879878	1:5879596-5879996	252.91	211.50	0.54	227.00	323.69	0.41	255.89	301.00	0.46	248.51	212.15	0.54	206.10	283.61	0.42	196.91	225.77	0.47	357.96	258.05	0.58	531.26	198.94	0.73	417.42	183.76	0.69	469.55	92.58	0.84	435.03	155.22	0.74	507.61	321.16	0.61	0.47333333333333333	0.6983333333333334	-0.22500000000000003	5.155889249641105e-14	1.1617703282014436e-12	N
AT1G17210|AT1G17210|1|-	2682.6	5880319	1:5880073-5880573	48.60	143.91	0.25	78.45	105.30	0.43	52.77	143.65	0.27	56.65	122.05	0.32	48.16	106.46	0.31	51.06	113.01	0.31	100.08	118.55	0.46	139.63	173.62	0.45	88.09	168.81	0.34	142.26	156.28	0.48	151.89	152.36	0.50	123.41	229.59	0.35	0.315	0.43	-0.11499999999999999	0.014093989631452555	0.04072462197375517	N
AT1G17220|AT1G17220|1|+	105210.0	5890211	1:5890010-5890500	423.60	704.98	0.38	444.40	698.73	0.39	385.23	648.30	0.37	353.43	829.94	0.30	404.82	771.23	0.34	330.19	645.96	0.34	627.56	780.65	0.45	991.55	788.16	0.56	668.87	942.91	0.41	640.31	721.56	0.47	886.85	771.16	0.53	896.26	642.44	0.58	0.35333333333333333	0.5	-0.14666666666666667	1.0220358796626502e-14	2.459072769057568e-13	N
AT1G17280|AT1G17280|1|-	3361.9	5917048	1:5916832-5917422	73.81	187.41	0.28	108.09	151.03	0.42	73.41	226.35	0.24	68.87	176.47	0.28	86.90	148.80	0.37	87.42	203.68	0.30	93.67	272.55	0.26	180.79	258.97	0.41	105.10	311.30	0.25	100.70	297.05	0.25	101.90	329.76	0.24	153.25	276.33	0.36	0.315	0.295	0.020000000000000018	0.6685660918631533	0.8379595425941251	N
AT1G17290|AT1G17290|1|+	13477.2	5926178	1:5925977-5926400	166.66	292.95	0.36	186.87	284.72	0.40	165.89	382.13	0.30	169.94	354.82	0.32	155.95	309.92	0.33	132.85	386.66	0.26	265.71	496.18	0.35	466.70	385.81	0.55	380.68	319.45	0.54	358.68	366.44	0.49	523.43	519.62	0.50	440.15	433.20	0.50	0.32833333333333337	0.4883333333333333	-0.15999999999999992	6.4093710027415235e-09	7.7670633724686e-08	N
AT1G17330|AT1G17330|1|+	403.6	5931734	1:5931509-5931926	6.71	66.83	0.09	7.94	65.04	0.11	8.63	58.31	0.13	4.05	58.41	0.06	8.67	55.92	0.13	6.34	50.44	0.11	18.49	74.33	0.20	14.68	95.25	0.13	9.98	106.47	0.09	10.28	80.97	0.11	11.16	77.09	0.13	20.31	89.93	0.18	0.105	0.14	-0.03500000000000002	0.6367002893269573	0.8101012516058866	N
AT1G17340|AT1G17340|1|+	458.4	5938509	1:5938308-5938817	23.91	77.80	0.24	26.29	84.18	0.24	25.71	72.55	0.26	29.93	39.09	0.43	12.70	74.02	0.15	9.57	72.58	0.12	35.31	103.11	0.26	41.65	105.71	0.28	39.35	111.80	0.26	40.30	93.99	0.30	51.54	87.28	0.37	35.00	125.15	0.22	0.24	0.2816666666666667	-0.041666666666666685	0.44896971314198253	0.6392904961815726	N
AT1G17350|AT1G17350|1|+	409.7	5944285	1:5944084-5944465	49.39	31.22	0.61	28.86	56.67	0.34	33.14	40.54	0.45	31.49	51.99	0.38	38.14	17.76	0.68	37.34	35.83	0.51	48.43	30.29	0.62	67.44	53.41	0.56	38.54	43.49	0.47	44.00	49.20	0.47	26.27	55.65	0.32	91.68	37.04	0.71	0.49499999999999994	0.525	-0.030000000000000082	0.44437628054299877	0.6345404655490413	N
AT1G17370|AT1G17370|1|-	4453.5	5951850	1:5951561-5952114	141.69	286.29	0.33	122.34	291.28	0.30	130.32	318.24	0.29	133.99	262.02	0.34	118.95	331.02	0.26	161.19	224.51	0.42	161.72	343.34	0.32	223.96	392.24	0.36	242.63	354.53	0.41	164.79	307.32	0.35	224.57	322.72	0.41	264.22	364.82	0.42	0.3233333333333333	0.37833333333333335	-0.05500000000000005	0.05063393554188311	0.11937115479945255	N
AT1G17440|AT1G17440|1|-	1240.7	5984352	1:5984013-5984589	54.63	91.38	0.37	49.03	103.87	0.32	44.77	76.88	0.37	41.00	57.87	0.41	50.52	91.14	0.36	36.22	105.90	0.25	68.95	102.11	0.40	86.67	63.59	0.58	87.97	80.48	0.52	39.73	114.49	0.26	87.74	103.70	0.46	75.95	92.65	0.45	0.3466666666666667	0.44500000000000006	-0.09833333333333338	0.09647551192265255	0.19889567675838138	N
AT1G17470|AT1G17470|1|+	3979.3	6006261	1:6006060-6006410	60.14	264.80	0.19	80.90	242.20	0.25	70.90	236.41	0.23	88.42	257.24	0.26	62.04	242.98	0.20	53.71	206.03	0.21	65.20	304.47	0.18	120.89	361.84	0.25	85.62	371.96	0.19	114.35	292.34	0.28	203.76	385.28	0.35	137.16	329.26	0.29	0.22333333333333336	0.25666666666666665	-0.0333333333333333	0.23287439765098927	0.39767535477880744	N
AT1G17490|AT1G17490|1|+	2600.9	6009235	1:6008963-6009420	26.87	203.25	0.12	18.79	175.73	0.10	19.16	173.61	0.10	30.16	213.17	0.12	29.16	190.77	0.13	22.95	272.40	0.08	24.62	181.19	0.12	49.44	292.66	0.14	37.54	235.36	0.14	42.24	295.03	0.13	52.63	269.22	0.16	34.49	270.64	0.11	0.10833333333333334	0.13333333333333333	-0.024999999999999994	0.3472736745881217	0.5339588916813814	N
AT1G17510|AT1G17510|1|-	401.6	6023664	1:6023504-6023865	14.79	53.19	0.22	26.35	75.87	0.26	15.59	68.19	0.19	49.87	43.99	0.53	8.87	55.69	0.14	21.28	46.38	0.31	25.61	58.75	0.30	22.34	78.79	0.22	13.77	42.39	0.25	7.22	68.83	0.09	30.81	83.35	0.27	51.59	44.62	0.54	0.27499999999999997	0.2783333333333333	-0.003333333333333355	1.0	1.0	N
AT1G17520|AT1G17520|1|-	437.3	6024789	1:6024636-6024990	1.32	57.32	0.02	4.54	61.31	0.07	5.10	56.29	0.08	23.90	14.50	0.62	3.05	89.06	0.03	3.04	58.88	0.05	19.58	113.79	0.15	23.76	120.75	0.16	9.09	101.56	0.08	4.70	140.44	0.03	19.10	100.71	0.16	12.61	95.35	0.12	0.14500000000000002	0.11666666666666668	0.028333333333333335	1.0	1.0	N
AT1G17550|AT1G17550|1|+	2548.0	6036956	1:6036605-6037398	112.88	155.73	0.42	91.23	166.18	0.35	100.86	144.37	0.41	74.69	161.48	0.32	76.04	179.68	0.30	78.10	173.76	0.31	123.39	206.59	0.37	163.78	154.83	0.51	199.43	190.96	0.51	145.07	141.70	0.51	209.57	119.99	0.64	235.17	35.90	0.87	0.3516666666666666	0.5683333333333334	-0.21666666666666673	8.75037318351497e-07	7.41282679664009e-06	N
AT1G17580|AT1G17580|1|+	1424.0	6049445	1:6049186-6049685	23.58	129.15	0.15	23.61	126.22	0.16	28.86	105.13	0.22	25.70	74.79	0.26	18.59	111.64	0.14	25.70	119.48	0.18	44.03	109.43	0.29	56.82	155.79	0.27	58.93	121.60	0.33	67.85	104.35	0.39	68.15	134.20	0.34	53.29	93.78	0.36	0.18500000000000003	0.33000000000000007	-0.14500000000000005	0.00289111269958795	0.010620697558523275	N
AT1G17650|AT1G17650|1|-	3846.4	6069557	1:6069424-6069758	2.53	75.15	0.03	4.76	131.31	0.03	3.72	82.53	0.04	6.01	106.91	0.05	4.90	69.93	0.07	0.81	60.05	0.01	7.04	90.18	0.07	9.52	206.29	0.04	20.06	115.95	0.15	7.45	87.97	0.08	20.85	192.56	0.10	12.99	143.03	0.08	0.03833333333333334	0.08666666666666667	-0.04833333333333333	0.17857505664318385	0.32246053750014864	N
AT1G17680|AT1G17680|1|+	574.4	6082160	1:6081781-6082395	45.59	29.76	0.60	33.93	55.27	0.38	36.37	49.45	0.42	14.90	64.60	0.19	26.22	61.81	0.30	34.59	86.45	0.29	44.81	31.87	0.58	71.96	22.57	0.76	65.01	45.73	0.59	94.89	0.00	1.00	108.92	0.00	1.00	104.20	0.00	1.00	0.3633333333333333	0.8216666666666667	-0.45833333333333337	1.2994474913190051e-11	2.2495835751283892e-10	N
AT1G17710|AT1G17710|1|-	1196.0	6090798	1:6090405-6091131	27.48	100.95	0.21	35.98	126.66	0.22	25.65	90.52	0.22	17.06	31.27	0.35	27.37	78.67	0.26	69.74	272.27	0.20	13.27	48.93	0.21	28.23	85.78	0.25	37.95	191.54	0.17	102.12	241.09	0.30	5.43	43.65	0.11	55.58	153.05	0.27	0.24333333333333332	0.21833333333333335	0.024999999999999967	0.7893843027853147	0.9330452975826897	N
AT1G17720|AT1G17720|1|-	1359.5	6093584	1:6093185-6094085	71.30	119.17	0.37	48.35	120.90	0.29	65.51	111.95	0.37	51.18	169.01	0.23	42.19	150.14	0.22	71.82	112.44	0.39	54.34	212.17	0.20	90.04	162.63	0.36	88.65	199.04	0.31	105.41	130.71	0.45	102.39	158.01	0.39	115.52	133.99	0.46	0.3116666666666666	0.36166666666666664	-0.050000000000000044	0.31100858373382734	0.49368886526566175	N
AT1G17730|AT1G17730|1|+	1532.2	6100201	1:6099867-6100397	59.18	82.03	0.42	35.99	82.68	0.30	67.56	46.80	0.59	37.02	86.36	0.30	40.36	84.02	0.32	49.74	94.72	0.34	84.47	140.69	0.38	124.84	142.19	0.47	139.81	169.96	0.45	54.10	192.11	0.22	165.47	125.81	0.57	120.69	168.13	0.42	0.37833333333333335	0.4183333333333333	-0.039999999999999925	0.44403192904821154	0.6341398791250471	N
AT1G17745|AT1G17745|1|+	7815.0	6105029	1:6104212-6105347	263.20	166.83	0.61	207.41	152.82	0.58	187.54	172.02	0.52	167.15	132.28	0.56	198.82	182.42	0.52	250.58	219.78	0.53	75.15	33.67	0.69	108.93	0.00	1.00	107.21	44.93	0.70	55.61	46.60	0.54	93.37	38.36	0.71	126.31	10.14	0.93	0.5533333333333333	0.7616666666666666	-0.20833333333333326	1.8088261905904388e-05	0.00011581382639109013	N
AT1G17780|AT1G17780|1|+	4937.0	6125122	1:6124722-6125278	76.75	16.20	0.83	56.06	33.43	0.63	65.86	27.49	0.71	100.14	0.00	1.00	71.16	21.63	0.77	46.92	48.90	0.49	99.95	16.66	0.86	111.98	11.01	0.91	107.10	31.44	0.77	198.93	0.00	1.00	120.39	42.98	0.74	136.33	33.27	0.80	0.7383333333333333	0.8466666666666667	-0.10833333333333339	0.042296565636992106	0.10274899599937776	N
AT1G17820|AT1G17820|1|-	291.5	6132224	1:6131627-6132425	62.02	11.98	0.84	51.79	17.59	0.75	47.73	14.84	0.76	82.43	0.00	1.00	51.16	2.39	0.96	69.87	25.93	0.73	56.27	0.00	1.00	52.89	2.21	0.96	44.78	6.33	0.88	72.73	0.00	1.00	62.04	0.00	1.00	64.31	0.00	1.00	0.8399999999999999	0.9733333333333333	-0.13333333333333341	0.006120021938967559	0.02021091990944521	N
AT1G17840|AT1G17840|1|+	1980.1	6145764	1:6145544-6145926	278.16	93.67	0.75	260.47	106.98	0.71	277.08	124.56	0.69	299.73	58.09	0.84	299.07	139.93	0.68	313.95	0.00	1.00	337.73	24.61	0.93	537.50	0.00	1.00	423.77	0.00	1.00	337.18	0.00	1.00	351.72	20.49	0.94	404.61	0.00	1.00	0.7783333333333333	0.9783333333333334	-0.20000000000000007	1.8077584171868533e-22	7.644125698547133e-21	N
AT1G17870|AT1G17870|1|-	240.3	6150188	1:6150038-6150394	89.90	2.22	0.98	74.89	49.14	0.60	40.93	27.44	0.60	90.25	19.31	0.82	85.92	0.00	1.00	84.00	48.58	0.63	79.33	0.00	1.00	89.31	5.50	0.94	145.24	0.00	1.00	58.93	28.76	0.67	82.17	12.36	0.87	62.24	14.47	0.81	0.7716666666666666	0.8816666666666665	-0.10999999999999988	0.014622896381539163	0.042032895962787004	N
AT1G17880|AT1G17880|1|-	38927.9	6152538	1:6152384-6152756	419.68	670.73	0.38	381.95	646.91	0.37	388.52	659.61	0.37	356.73	630.65	0.36	402.16	557.62	0.42	334.88	678.18	0.33	834.54	1019.83	0.45	1104.86	1312.01	0.46	821.46	1245.96	0.40	885.44	1136.54	0.44	1082.15	1218.52	0.47	892.36	1171.42	0.43	0.37166666666666665	0.44166666666666665	-0.07	0.000243856012356803	0.0012128114088035791	N
AT1G17930|AT1G17930|1|-	125.5	6166586	1:6166220-6166835	23.49	22.08	0.52	17.92	21.60	0.45	24.62	21.13	0.54	17.11	46.22	0.27	18.48	30.61	0.38	14.26	30.87	0.32	29.17	13.00	0.69	31.80	18.64	0.63	33.05	37.71	0.47	29.43	41.92	0.41	36.96	18.88	0.66	41.55	24.08	0.63	0.41333333333333333	0.5816666666666667	-0.16833333333333333	0.11736911241838915	0.23233005380508626	N
AT1G17940|AT1G17940|1|-	220.6	6169507	1:6169285-6169708	25.78	51.64	0.33	48.27	46.80	0.51	20.96	50.38	0.29	39.13	47.16	0.45	44.08	30.13	0.59	28.12	65.75	0.30	44.84	26.00	0.63	52.10	11.61	0.82	56.77	51.01	0.53	47.46	63.98	0.43	65.25	49.12	0.57	50.05	55.12	0.48	0.4116666666666666	0.5766666666666667	-0.16500000000000004	0.07179775835688099	0.15836943946555523	N
AT1G17970|AT1G17970|1|+	2003.8	6187269	1:6187068-6187465	10.72	57.45	0.16	2.93	41.43	0.07	9.46	72.96	0.11	11.66	61.90	0.16	2.68	72.81	0.04	2.34	83.77	0.03	30.46	225.00	0.12	43.44	158.44	0.22	48.63	193.77	0.20	20.51	220.28	0.09	17.84	131.64	0.12	26.49	211.79	0.11	0.09500000000000001	0.14333333333333334	-0.048333333333333325	0.30479351308121466	0.4861529918921397	N
AT1G17980|AT1G17980|1|-	1368.1	6187580	1:6187499-6187781	25.24	57.30	0.31	25.17	57.45	0.30	34.83	59.58	0.37	5.11	86.72	0.06	17.89	64.94	0.22	17.65	47.31	0.27	25.61	49.89	0.34	50.79	42.37	0.55	19.88	79.90	0.20	28.32	80.25	0.26	25.27	66.43	0.28	57.00	60.47	0.49	0.255	0.35333333333333333	-0.09833333333333333	0.14249727554804517	0.27090021563438393	N
AT1G17990|AT1G17990|1|-	80231.3	6192561	1:6192033-6192762	462.46	0.00	1.00	557.50	0.00	1.00	571.33	0.00	1.00	520.13	0.00	1.00	512.84	0.00	1.00	584.44	0.00	1.00	937.13	0.00	1.00	727.81	0.00	1.00	957.10	0.00	1.00	989.41	0.00	1.00	849.33	0.00	1.00	955.47	0.00	1.00	1.0	1.0	0.0	1.0	1.0	N
AT1G18020|AT1G18020|1|+	47742.1	6203876	1:6203265-6204234	80.78	312.36	0.21	88.10	383.77	0.19	101.23	395.50	0.20	116.19	308.32	0.27	68.25	346.33	0.16	68.54	430.73	0.14	182.12	593.33	0.23	133.43	450.07	0.23	123.86	615.14	0.17	128.11	626.96	0.17	75.18	588.97	0.11	136.10	604.17	0.18	0.19499999999999998	0.18166666666666667	0.013333333333333308	0.6426338665806361	0.815458144836136	N
AT1G18030|AT1G18030|1|+	638.6	6206769	1:6206568-6206871	17.82	45.21	0.28	34.43	40.95	0.46	38.74	32.68	0.54	24.06	50.05	0.32	17.13	43.14	0.28	24.51	43.42	0.36	32.57	66.12	0.33	79.34	48.87	0.62	75.74	50.77	0.60	16.43	108.69	0.13	113.85	49.89	0.70	70.92	18.12	0.80	0.37333333333333335	0.5299999999999999	-0.15666666666666657	0.06844024404722905	0.15228184171458017	N
AT1G18060|AT1G18060|1|-	11279.5	6212003	1:6211832-6212355	466.55	374.69	0.55	511.88	407.14	0.56	388.64	345.73	0.53	528.25	418.44	0.56	390.91	359.54	0.52	476.07	402.84	0.54	546.98	389.26	0.58	824.24	376.32	0.69	794.11	307.03	0.72	623.57	505.13	0.55	835.78	417.24	0.67	810.53	245.37	0.77	0.5433333333333333	0.6633333333333333	-0.12	8.846758573876702e-08	8.791023994861279e-07	N
AT1G18070|AT1G18070|1|-	19466.0	6213879	1:6213651-6214113	98.37	387.31	0.20	125.36	346.88	0.27	81.14	299.40	0.21	81.20	337.48	0.19	88.52	289.91	0.23	86.94	355.45	0.20	90.30	492.21	0.16	186.79	683.56	0.21	122.85	659.63	0.16	141.59	640.96	0.18	237.80	746.84	0.24	197.51	690.22	0.22	0.21666666666666667	0.19499999999999998	0.021666666666666695	0.46100985761019464	0.6497950290882984	N
AT1G18080|AT1G18080|1|+	101298.7	6224001	1:6223800-6224242	262.74	803.62	0.25	272.56	844.73	0.24	228.94	741.29	0.24	252.60	732.83	0.26	286.64	632.66	0.31	171.68	645.55	0.21	241.71	1173.26	0.17	333.55	1498.01	0.18	206.72	1445.16	0.13	267.79	1294.04	0.17	304.22	1392.24	0.18	240.71	1199.58	0.17	0.25166666666666665	0.16666666666666666	0.08499999999999999	2.47114952620199e-07	2.292792982434097e-06	N
AT1G18150|AT1G18150|1|-	551.7	6244449	1:6244298-6244718	19.71	75.32	0.21	12.46	67.16	0.16	7.59	62.00	0.11	10.52	92.15	0.10	5.68	72.78	0.07	6.33	97.03	0.06	17.81	103.26	0.15	41.79	116.55	0.26	22.34	92.34	0.19	28.31	114.11	0.20	16.10	86.09	0.16	23.25	93.69	0.20	0.11833333333333333	0.19333333333333336	-0.07500000000000002	0.18244851506677667	0.3277871802962502	N
AT1G18160|AT1G18160|1|+	7084.4	6253880	1:6253451-6254080	73.64	85.57	0.46	76.58	44.67	0.63	88.85	69.66	0.56	42.27	83.99	0.33	41.14	104.47	0.28	78.75	63.15	0.55	92.28	92.35	0.50	187.16	28.25	0.87	98.64	88.26	0.53	149.22	54.15	0.73	160.36	13.00	0.92	128.09	82.91	0.61	0.46833333333333343	0.6933333333333334	-0.22499999999999992	2.9539814145406354e-05	0.00018052714216660698	N
AT1G18170|AT1G18170|1|+	1392.4	6255419	1:6255141-6255734	111.00	115.43	0.49	115.52	81.00	0.59	98.04	100.57	0.49	116.54	112.21	0.51	97.10	153.72	0.39	106.21	93.48	0.53	155.05	153.64	0.50	231.38	73.00	0.76	156.45	169.37	0.48	157.95	94.52	0.63	191.88	165.72	0.54	179.03	79.92	0.69	0.5	0.6	-0.09999999999999998	0.03127829694536519	0.0797363870564633	N
AT1G18190|AT1G18190|1|-	202.8	6258024	1:6257900-6258328	81.26	12.62	0.87	70.09	13.05	0.84	72.13	15.71	0.82	60.10	14.08	0.81	41.76	29.11	0.59	99.42	11.65	0.90	49.65	14.14	0.78	69.30	28.27	0.71	73.61	21.10	0.78	79.28	15.64	0.84	75.85	11.09	0.87	88.36	0.00	1.00	0.805	0.8300000000000001	-0.025000000000000022	0.8451316980832504	0.973576824003392	N
AT1G18250|AT1G18250|1|-	255.8	6277018	1:6276777-6277372	77.78	17.83	0.81	57.09	26.23	0.69	53.18	45.46	0.54	39.80	32.57	0.55	35.25	72.93	0.33	37.17	63.46	0.37	65.65	44.38	0.60	45.80	6.41	0.88	56.01	13.39	0.81	57.63	4.10	0.93	60.94	0.00	1.00	34.32	8.90	0.79	0.5483333333333333	0.8350000000000001	-0.28666666666666674	0.0003400106264088385	0.001628282214276929	N
AT1G18260|AT1G18260|1|-	886.0	6279019	1:6278788-6279286	65.05	76.62	0.46	80.46	54.15	0.60	75.26	56.06	0.57	85.65	5.75	0.94	61.58	40.41	0.60	88.47	22.45	0.80	92.22	81.65	0.53	144.01	99.44	0.59	160.77	67.08	0.71	118.64	98.73	0.55	179.50	84.93	0.68	157.75	42.72	0.79	0.6616666666666666	0.6416666666666667	0.019999999999999907	1.0	1.0	N
AT1G18270|AT1G18270|1|-	8027.8	6283571	1:6283370-6284050	45.40	46.73	0.49	18.44	62.71	0.23	26.93	58.17	0.32	22.55	62.30	0.27	33.31	61.83	0.35	27.70	76.08	0.27	39.77	119.46	0.25	58.44	105.28	0.36	40.76	124.82	0.25	52.43	134.70	0.28	71.37	121.45	0.37	74.16	134.78	0.35	0.3216666666666667	0.31000000000000005	0.011666666666666659	0.8901348970039753	1.0	N
AT1G18330|AT1G18330|1|-	2630.3	6306549	1:6305814-6306945	288.68	89.70	0.76	292.53	85.43	0.77	429.31	67.24	0.86	237.20	26.99	0.90	273.38	95.89	0.74	209.73	74.98	0.74	297.01	24.03	0.93	320.39	0.00	1.00	308.04	0.00	1.00	323.73	0.00	1.00	417.42	0.00	1.00	298.07	0.00	1.00	0.795	0.9883333333333333	-0.19333333333333325	7.715495637648678e-18	2.3884386339973496e-16	N
AT1G18335|AT1G18335|1|-	420.0	6309064	1:6308925-6309308	13.65	28.23	0.33	13.59	29.87	0.31	29.22	52.72	0.36	8.47	50.31	0.14	12.68	67.78	0.16	25.44	77.18	0.25	28.57	52.73	0.35	31.24	81.63	0.28	28.25	107.58	0.21	52.97	107.62	0.33	26.66	43.07	0.38	52.25	77.38	0.40	0.25833333333333336	0.32499999999999996	-0.0666666666666666	0.4007596123118095	0.5921707461029667	N
AT1G18360|AT1G18360|1|-	538.0	6316970	1:6316738-6317397	79.86	30.98	0.72	52.23	42.26	0.55	61.00	51.08	0.54	98.61	33.60	0.75	71.88	56.02	0.56	66.09	65.36	0.50	113.24	30.79	0.79	78.82	77.19	0.51	96.51	69.60	0.58	101.49	23.41	0.81	186.81	0.00	1.00	108.41	23.06	0.82	0.6033333333333334	0.7516666666666666	-0.1483333333333332	0.01134503722092741	0.034101593893325316	N
AT1G18440|AT1G18440|1|+	879.9	6347774	1:6347573-6347918	2.32	52.13	0.04	1.86	43.20	0.04	5.04	40.53	0.11	2.82	49.31	0.05	1.35	39.15	0.03	4.00	37.74	0.10	6.91	44.62	0.13	14.74	62.15	0.19	18.12	55.68	0.25	21.82	63.10	0.26	9.83	64.58	0.13	3.58	57.78	0.06	0.06166666666666667	0.17	-0.10833333333333334	0.0447278521676983	0.10764365875282586	N
AT1G18450|AT1G18450|1|+	3955.6	6351922	1:6351721-6352010	33.53	80.67	0.29	16.50	98.84	0.14	17.48	106.97	0.14	25.06	81.55	0.24	18.09	95.00	0.16	6.17	74.04	0.08	21.99	184.45	0.11	34.11	235.50	0.13	48.65	158.73	0.23	29.95	134.30	0.18	32.31	201.38	0.14	70.05	246.43	0.22	0.17500000000000002	0.16833333333333333	0.006666666666666682	0.8775637420576519	0.9918987105414631	N
AT1G18460|AT1G18460|1|+	3034.8	6355381	1:6355026-6355695	249.00	0.00	1.00	175.70	32.94	0.84	245.87	0.00	1.00	130.88	37.62	0.78	166.53	13.24	0.93	216.95	0.00	1.00	276.69	0.00	1.00	258.39	0.00	1.00	253.36	0.00	1.00	271.16	0.00	1.00	269.60	0.00	1.00	216.50	0.00	1.00	0.9249999999999999	1.0	-0.07500000000000007	2.4906699439182626e-05	0.0001547829095229254	N
AT1G18470|AT1G18470|1|-	5634.2	6356284	1:6356113-6356485	152.76	57.84	0.73	88.22	129.98	0.40	82.03	136.26	0.38	125.50	118.34	0.51	106.53	153.60	0.41	115.20	129.96	0.47	214.56	143.39	0.60	256.51	153.78	0.63	101.73	279.39	0.27	249.35	60.15	0.81	243.14	116.40	0.68	273.84	105.39	0.72	0.4833333333333332	0.6183333333333333	-0.13500000000000006	0.0023073213589427867	0.008734419940500752	N
AT1G18490|AT1G18490|1|+	1098.6	6368711	1:6368510-6368879	4.53	65.28	0.06	2.79	58.08	0.05	2.52	62.07	0.04	4.48	75.74	0.06	3.40	58.76	0.05	0.33	51.05	0.01	4.85	64.46	0.07	8.08	102.65	0.07	5.18	141.65	0.04	2.40	90.52	0.03	6.69	98.80	0.06	10.51	122.70	0.08	0.045000000000000005	0.05833333333333334	-0.013333333333333336	1.0	1.0	N
AT1G18500|AT1G18500|1|+	3134.5	6372930	1:6372729-6373080	52.98	88.72	0.37	67.98	96.12	0.41	53.36	105.00	0.34	23.63	101.92	0.19	45.74	83.11	0.36	51.05	111.79	0.31	62.43	243.11	0.20	140.85	255.44	0.36	73.00	254.96	0.22	110.20	261.84	0.30	99.77	266.77	0.27	130.43	197.90	0.40	0.33	0.2916666666666667	0.03833333333333333	0.39197092391372	0.5830357141385889	N
AT1G18540|AT1G18540|1|-	94825.0	6377402	1:6377256-6377603	158.99	1125.51	0.12	170.80	947.74	0.15	161.97	908.32	0.15	202.67	1017.68	0.17	182.52	925.50	0.16	131.22	927.59	0.12	323.63	1441.47	0.18	561.54	1704.80	0.25	410.83	1485.14	0.22	463.50	1434.19	0.24	502.99	1953.86	0.20	372.01	1625.81	0.19	0.14500000000000002	0.21333333333333335	-0.06833333333333333	2.465550437877019e-06	1.9051457776970405e-05	N
AT1G18570|AT1G18570|1|+	411.9	6391047	1:6390234-6391386	14.13	29.40	0.32	10.02	40.39	0.20	31.91	131.41	0.20	18.19	35.50	0.34	4.22	38.10	0.10	7.25	44.79	0.14	19.24	85.57	0.18	17.31	55.18	0.24	20.49	61.06	0.25	55.26	44.05	0.56	11.00	71.57	0.13	9.48	95.18	0.09	0.2166666666666667	0.24166666666666667	-0.024999999999999967	0.7020898559553175	0.8648403246098908	N
AT1G18620|AT1G18620|1|+	8494.8	6414254	1:6413443-6414569	62.82	221.19	0.22	42.83	216.50	0.17	60.37	320.49	0.16	53.63	218.04	0.20	57.43	214.80	0.21	43.87	232.60	0.16	160.67	329.41	0.33	185.44	297.60	0.38	203.59	343.71	0.37	157.89	295.68	0.35	196.13	270.15	0.42	197.95	269.76	0.42	0.18666666666666665	0.37833333333333335	-0.1916666666666667	8.05321590567876e-09	9.560908775953387e-08	N
AT1G18650|AT1G18650|1|-	23734.4	6419012	1:6418838-6419459	86.11	125.02	0.41	95.98	117.60	0.45	83.07	135.95	0.38	45.90	138.77	0.25	99.73	105.78	0.49	111.58	96.07	0.54	155.02	154.41	0.50	261.92	80.06	0.77	159.17	105.29	0.60	162.52	54.32	0.75	213.14	76.02	0.74	167.48	132.58	0.56	0.42	0.6533333333333334	-0.23333333333333345	6.28111554446442e-07	5.451130582126021e-06	N
AT1G18660|AT1G18660|1|+	12665.6	6425743	1:6425346-6425898	85.83	73.60	0.54	103.80	53.61	0.66	74.31	112.43	0.40	73.11	107.71	0.40	64.88	56.12	0.54	94.55	67.48	0.58	135.62	80.78	0.63	171.29	93.52	0.65	147.66	104.46	0.59	140.03	86.15	0.62	188.88	67.92	0.74	178.59	87.20	0.67	0.52	0.65	-0.13	0.007060573280899499	0.022858183571981428	N
AT1G18670|AT1G18670|1|-	1550.0	6427972	1:6426709-6428512	28.02	29.37	0.49	26.06	31.29	0.45	31.80	38.13	0.45	26.94	22.41	0.55	22.10	29.53	0.43	19.80	36.57	0.35	47.74	33.44	0.59	49.58	31.21	0.61	46.57	21.30	0.69	44.00	37.68	0.54	36.56	14.82	0.71	45.41	24.99	0.65	0.45333333333333337	0.6316666666666666	-0.17833333333333323	0.0724775395840748	0.15962085790047678	N
AT1G18680|AT1G18680|1|-	353.4	6432074	1:6431938-6432275	20.35	27.98	0.42	2.78	47.44	0.06	6.74	37.38	0.15	3.63	36.37	0.09	20.24	34.54	0.37	11.06	37.30	0.23	28.33	31.89	0.47	20.75	52.32	0.28	39.40	62.05	0.39	19.18	57.91	0.25	43.05	48.19	0.47	40.48	60.70	0.40	0.21999999999999997	0.3766666666666667	-0.15666666666666673	0.07809156389415924	0.16928356684473392	N
AT1G18690|AT1G18690|1|+	194.2	6434534	1:6434333-6437236	28.85	14.73	0.66	24.48	10.01	0.71	28.97	20.08	0.59	26.33	15.49	0.63	26.39	14.22	0.65	26.30	18.06	0.59	16.85	49.42	0.25	15.77	54.50	0.22	16.84	37.85	0.31	13.04	30.18	0.30	18.94	63.71	0.23	17.52	63.10	0.22	0.6383333333333333	0.255	0.3833333333333333	9.726466648583384e-05	0.0005328109100715165	N
AT1G18710|AT1G18710|1|+	2388.9	6452997	1:6452446-6453263	54.02	78.35	0.41	59.09	96.23	0.38	58.15	100.87	0.37	9.13	71.30	0.11	37.55	89.93	0.29	28.74	90.85	0.24	70.73	118.81	0.37	91.05	80.48	0.53	99.46	217.65	0.31	190.39	224.78	0.46	233.05	176.22	0.57	193.77	179.50	0.52	0.30000000000000004	0.45999999999999996	-0.15999999999999992	0.005656522368849775	0.018840296187398443	N
AT1G18720|AT1G18720|1|-	28713.3	6457941	1:6457775-6458142	29.59	302.45	0.09	33.29	268.69	0.11	32.75	267.15	0.11	18.31	295.83	0.06	31.16	295.38	0.10	17.18	348.30	0.05	32.04	407.09	0.07	61.98	421.42	0.13	40.00	451.85	0.08	59.57	529.24	0.10	93.08	462.67	0.17	68.51	415.48	0.14	0.08666666666666667	0.115	-0.028333333333333335	0.16070210230453563	0.29726299154880315	N
AT1G18750|AT1G18750|1|+	361.2	6469364	1:6469163-6469984	NA	NA	NA	22.44	11.30	0.67	NA	NA	NA	24.04	10.44	0.70	20.16	11.81	0.63	36.93	6.10	0.86	34.10	0.00	1.00	NA	NA	NA	24.12	8.25	0.75	41.20	0.00	1.00	30.34	0.64	0.98	37.81	0.00	1.00	0.715	0.9460000000000001	-0.2310000000000001	0.013169080963617644	0.03852256624535429	N
AT1G18773|AT1G18773|1|+	803.2	6475309	1:6475108-6475979	39.14	0.00	1.00	45.95	0.00	1.00	44.16	0.00	1.00	24.34	20.68	0.54	39.74	0.00	1.00	36.36	0.00	1.00	49.25	0.00	1.00	52.26	0.00	1.00	44.32	0.00	1.00	62.83	0.00	1.00	52.21	0.00	1.00	64.26	0.00	1.00	0.9233333333333333	1.0	-0.07666666666666666	0.07701477441028765	0.16746079065974362	N
AT1G18800|AT1G18800|1|-	1335.1	6481324	1:6481113-6481525	45.17	145.28	0.24	63.05	128.40	0.33	42.49	106.50	0.29	42.52	112.84	0.27	51.77	145.84	0.26	41.67	122.98	0.25	45.27	183.78	0.20	52.05	228.94	0.19	56.99	199.20	0.22	67.70	273.92	0.20	43.06	224.63	0.16	58.22	227.59	0.20	0.2733333333333334	0.19500000000000003	0.07833333333333334	0.06186711085103811	0.14055177881270364	N
AT1G18850|AT1G18850|1|-	420.5	6505960	1:6504677-6506161	57.25	20.02	0.74	53.74	8.52	0.86	64.03	13.51	0.83	56.07	0.00	1.00	53.00	2.62	0.95	45.27	9.09	0.83	46.12	23.58	0.66	47.49	0.00	1.00	67.53	0.00	1.00	48.63	0.00	1.00	64.89	0.00	1.00	56.49	0.00	1.00	0.8683333333333333	0.9433333333333334	-0.07500000000000007	0.2073767328050659	0.362338513217748	N
AT1G18880|AT1G18880|1|+	340.6	6522596	1:6522341-6522764	125.07	0.00	1.00	64.93	43.16	0.60	110.18	13.75	0.89	63.56	9.40	0.87	114.55	0.00	1.00	84.86	15.84	0.84	104.68	7.44	0.93	70.89	24.85	0.74	124.36	0.00	1.00	27.73	41.53	0.40	87.88	0.00	1.00	66.42	0.00	1.00	0.8666666666666667	0.8450000000000001	0.021666666666666612	1.0	1.0	N
AT1G18950|AT1G18950|1|+	1470.0	6551711	1:6550763-6552108	88.18	88.96	0.50	57.93	103.94	0.36	98.99	73.36	0.57	101.63	31.78	0.76	75.40	67.39	0.53	83.34	85.79	0.49	127.91	12.71	0.91	120.52	5.69	0.95	117.37	17.17	0.87	157.24	0.00	1.00	123.66	16.08	0.88	125.05	2.57	0.98	0.535	0.9316666666666666	-0.3966666666666666	7.809943328557525e-16	2.06953084949003e-14	N
AT1G19000|AT1G19000|1|-	169154.9	6561325	1:6560491-6561682	643.38	1369.37	0.32	663.77	1333.99	0.33	645.83	1591.63	0.29	467.45	1120.23	0.29	557.39	1303.17	0.30	659.51	1311.38	0.33	909.32	1418.38	0.39	1172.20	1180.52	0.50	1055.05	1272.02	0.45	913.39	1169.63	0.44	1090.19	857.93	0.56	1053.17	964.00	0.52	0.31	0.4766666666666666	-0.16666666666666663	1.2857506305816783e-26	7.058841997839855e-25	N
AT1G19050|AT1G19050|1|-	195.4	6577959	1:6577833-6578165	17.61	15.53	0.53	24.15	28.74	0.46	41.24	11.89	0.78	48.00	11.91	0.80	26.44	16.34	0.62	36.73	21.92	0.63	74.91	35.52	0.68	115.65	26.30	0.81	97.64	10.19	0.91	163.18	19.44	0.89	140.10	0.00	1.00	130.05	2.78	0.98	0.6366666666666667	0.8783333333333335	-0.2416666666666668	0.0006498752851024896	0.002868863042231648	N
AT1G19080|AT1G19080|1|+	1556.3	6586400	1:6586199-6586517	12.65	55.40	0.19	6.76	55.85	0.11	10.16	57.68	0.15	4.56	41.04	0.10	1.57	57.17	0.03	7.09	83.17	0.08	6.73	55.05	0.11	18.27	98.75	0.16	12.81	125.07	0.09	0.00	82.08	0.00	9.24	77.95	0.11	8.45	57.50	0.13	0.10999999999999999	0.09999999999999999	0.009999999999999995	1.0	1.0	N
AT1G19100|AT1G19100|1|+	227.9	6601244	1:6601043-6601355	23.71	32.80	0.42	36.68	48.37	0.43	18.64	52.24	0.26	45.39	8.02	0.85	12.77	60.13	0.18	10.76	31.91	0.25	4.48	43.81	0.09	16.47	41.04	0.29	32.66	46.17	0.41	13.74	33.67	0.29	34.17	73.82	0.32	9.85	40.34	0.20	0.3983333333333334	0.26666666666666666	0.1316666666666667	0.25759704720633436	0.4299653534857105	N
AT1G19110|AT1G19110|1|+	1476.2	6605687	1:6605431-6606028	99.82	74.13	0.57	94.70	105.24	0.47	99.63	110.67	0.47	56.25	51.14	0.52	83.75	91.99	0.48	61.82	110.82	0.36	144.60	107.20	0.57	194.71	27.43	0.88	103.94	164.91	0.39	115.06	104.78	0.52	152.03	61.11	0.71	206.12	109.33	0.65	0.47833333333333333	0.62	-0.14166666666666666	0.005227683863501212	0.017603352948699268	N
AT1G19130|AT1G19130|1|-	821.4	6609537	1:6609369-6609865	128.60	57.50	0.69	129.19	76.53	0.63	117.31	83.44	0.58	116.96	64.82	0.64	100.38	71.23	0.58	124.19	82.77	0.60	122.34	80.97	0.60	160.24	78.02	0.67	110.87	108.18	0.51	154.39	62.16	0.71	204.12	49.57	0.80	195.96	20.90	0.90	0.62	0.6983333333333334	-0.07833333333333337	0.09431982374656393	0.19571018763199122	N
AT1G19140|AT1G19140|1|-	483.1	6610913	1:6610652-6611136	7.84	76.44	0.09	10.28	74.24	0.12	5.49	70.76	0.07	5.25	73.05	0.07	27.24	44.14	0.38	2.76	68.35	0.04	38.22	63.43	0.38	34.42	122.55	0.22	42.56	81.76	0.34	21.48	77.75	0.22	26.97	150.12	0.15	51.61	100.70	0.34	0.12833333333333333	0.27499999999999997	-0.14666666666666664	0.014239990513160643	0.04109868885543925	N
AT1G19170|AT1G19170|1|+	211.8	6618551	1:6618350-6619006	54.30	17.79	0.75	61.72	13.44	0.82	59.70	7.68	0.89	43.02	33.24	0.56	41.75	48.81	0.46	44.81	39.12	0.53	42.79	24.33	0.64	67.00	0.00	1.00	59.53	0.00	1.00	74.66	20.48	0.78	56.81	15.46	0.79	63.64	0.00	1.00	0.6683333333333333	0.8683333333333333	-0.19999999999999996	0.0068506273973648725	0.022297636569805025	N
AT1G19220|AT1G19220|1|-	409.3	6628377	1:6627683-6628578	8.12	37.27	0.18	NA	NA	NA	7.02	52.58	0.12	1.96	50.85	0.04	9.26	47.20	0.16	6.78	45.46	0.13	15.78	78.55	0.17	30.05	55.60	0.35	27.48	82.20	0.25	29.19	50.30	0.37	21.77	50.56	0.30	25.43	89.84	0.22	0.126	0.27666666666666667	-0.15066666666666667	0.05337045514538891	0.1248157714238008	N
AT1G19240|AT1G19240|1|-	348.3	6649493	1:6649375-6649694	44.86	23.39	0.66	38.33	45.32	0.46	32.19	47.91	0.40	7.72	41.19	0.16	34.86	43.41	0.45	27.07	35.03	0.44	52.22	33.28	0.61	42.27	74.21	0.36	79.96	48.00	0.62	107.70	18.19	0.86	80.41	77.75	0.51	91.18	54.46	0.63	0.4283333333333333	0.5983333333333333	-0.16999999999999998	0.03496876615425103	0.08743951416074294	N
AT1G19270|AT1G19270|1|+	149.5	6665733	1:6665532-6666032	42.94	0.00	1.00	28.35	31.66	0.47	39.91	19.95	0.67	69.88	6.31	0.92	22.87	15.98	0.59	56.26	13.51	0.81	56.58	1.77	0.97	48.27	12.52	0.79	35.25	26.38	0.57	59.64	22.67	0.72	35.94	13.50	0.73	47.60	0.00	1.00	0.7433333333333333	0.7966666666666665	-0.05333333333333323	0.6589230401188724	0.8288250948938272	N
AT1G19310|AT1G19310|1|-	1398.6	6676509	1:6676210-6677140	62.84	58.47	0.52	78.52	18.44	0.81	78.50	81.67	0.49	46.26	56.65	0.45	75.79	37.05	0.67	85.59	34.70	0.71	115.25	76.10	0.60	106.71	23.77	0.82	146.84	10.13	0.94	161.70	0.00	1.00	145.64	0.00	1.00	181.80	0.00	1.00	0.6083333333333333	0.8933333333333332	-0.2849999999999999	5.366873953784148e-08	5.526489790544361e-07	N
AT1G19330|AT1G19330|1|-	1480.0	6680641	1:6680423-6680940	23.33	75.18	0.24	7.76	93.81	0.08	34.02	105.75	0.24	21.32	42.59	0.33	23.03	93.04	0.20	49.27	93.18	0.35	31.97	174.49	0.15	35.26	215.04	0.14	44.89	216.56	0.17	29.53	167.03	0.15	63.01	223.78	0.22	52.94	288.05	0.16	0.24	0.165	0.07499999999999998	0.10665470988289608	0.21523717548869584	N
AT1G19350|AT1G19350|1|+	39542.2	6689623	1:6689422-6690399	923.06	0.00	1.00	961.33	0.00	1.00	1208.28	0.00	1.00	726.92	0.00	1.00	965.14	0.00	1.00	970.66	0.00	1.00	1093.71	0.00	1.00	953.06	0.00	1.00	1021.00	0.00	1.00	963.11	0.00	1.00	877.01	0.00	1.00	1066.56	0.00	1.00	1.0	1.0	0.0	1.0	1.0	N
AT1G19360|AT1G19360|1|-	376.4	6691421	1:6691216-6691787	72.96	68.01	0.52	123.46	7.07	0.95	118.08	0.00	1.00	121.58	17.75	0.87	122.54	4.04	0.97	146.20	6.59	0.96	102.42	19.54	0.84	91.70	12.75	0.88	102.61	26.76	0.79	104.26	0.00	1.00	109.69	0.00	1.00	95.15	14.56	0.87	0.8783333333333333	0.8966666666666666	-0.018333333333333313	0.6943817424041225	0.8582178326206177	N
AT1G19380|AT1G19380|1|+	791.6	6698644	1:6698435-6698858	17.82	45.41	0.28	20.19	75.55	0.21	38.48	79.90	0.33	37.31	168.11	0.18	30.38	31.33	0.49	38.32	90.45	0.30	32.49	81.38	0.29	60.20	44.59	0.57	38.87	19.38	0.67	123.84	120.94	0.51	33.85	58.36	0.37	143.38	197.74	0.42	0.29833333333333334	0.4716666666666667	-0.17333333333333334	0.0032451780223485805	0.011723800587933018	N
AT1G19400|AT1G19400|1|-	10868.5	6712180	1:6712022-6712437	176.16	294.65	0.37	269.80	299.93	0.47	252.19	394.82	0.39	183.38	186.13	0.50	227.00	229.08	0.50	157.02	237.02	0.40	335.37	485.29	0.41	478.99	449.48	0.52	449.12	469.21	0.49	393.48	478.02	0.45	432.61	518.04	0.46	545.78	473.65	0.54	0.4383333333333333	0.47833333333333333	-0.040000000000000036	0.12797945649022824	0.24891095404056154	N
AT1G19430|AT1G19430|1|-	397.7	6724666	1:6724413-6724867	10.47	59.12	0.15	19.06	90.66	0.17	13.24	52.59	0.20	13.30	60.95	0.18	16.63	55.87	0.23	11.93	49.76	0.19	20.89	60.62	0.26	31.90	69.35	0.32	13.37	97.95	0.12	14.88	62.55	0.19	20.46	100.27	0.17	24.54	98.28	0.20	0.18666666666666665	0.21	-0.023333333333333345	0.8492922934456436	0.9761053962846895	N
AT1G19450|AT1G19450|1|-	1317.8	6731596	1:6731411-6731898	50.45	140.92	0.26	66.64	132.39	0.33	64.64	120.88	0.35	79.34	168.27	0.32	56.18	142.40	0.28	68.32	195.43	0.26	110.32	223.86	0.33	135.76	181.93	0.43	96.41	205.67	0.32	78.00	180.89	0.30	147.74	203.36	0.42	117.00	136.86	0.46	0.3	0.3766666666666667	-0.07666666666666672	0.07413914848268532	0.162536544828634	N
AT1G19485|AT1G19485|1|+	829.3	6751359	1:6751085-6751544	123.88	0.00	1.00	92.03	28.71	0.76	131.96	0.00	1.00	84.32	70.24	0.55	102.99	1.05	0.99	121.93	0.00	1.00	170.36	0.00	1.00	174.23	0.47	1.00	131.17	11.01	0.92	140.90	0.00	1.00	232.94	0.00	1.00	167.46	0.00	1.00	0.8833333333333333	0.9866666666666667	-0.10333333333333339	6.446307228733826e-06	4.5951904542272614e-05	N
AT1G19530|AT1G19530|1|+	461.4	6764794	1:6764572-6765049	18.74	72.13	0.21	20.47	62.06	0.25	32.17	72.64	0.31	23.67	90.56	0.21	13.24	70.26	0.16	25.27	55.20	0.31	50.28	64.05	0.44	92.56	136.12	0.40	34.88	81.90	0.30	14.93	100.39	0.13	36.68	80.05	0.31	34.18	71.16	0.32	0.24166666666666667	0.3166666666666667	-0.07500000000000004	0.17848779451184682	0.3224201443490678	N
AT1G19570|AT1G19570|1|-	146049.0	6773512	1:6773302-6773954	1776.26	474.44	0.79	1655.15	557.13	0.75	1722.14	601.79	0.74	1476.07	483.72	0.75	1657.53	592.85	0.74	1920.78	849.57	0.69	2004.38	386.18	0.84	2661.30	0.00	1.00	2955.28	233.08	0.93	3360.52	185.96	0.95	2990.76	0.00	1.00	3344.50	0.00	1.00	0.7433333333333335	0.9533333333333333	-0.20999999999999974	1.594290437367795e-115	5.110472282620574e-113	N
AT1G19580|AT1G19580|1|+	1191.4	6777196	1:6776802-6777568	38.14	94.92	0.29	49.69	43.71	0.53	42.05	76.62	0.35	37.55	66.73	0.36	46.34	69.63	0.40	35.44	91.17	0.28	74.94	124.41	0.38	66.55	160.70	0.29	46.30	151.10	0.23	65.11	119.33	0.35	88.64	74.02	0.54	71.24	113.71	0.39	0.36833333333333335	0.36333333333333334	0.0050000000000000044	1.0	1.0	N
AT1G19600|AT1G19600|1|+	6059.3	6780985	1:6780650-6781222	96.19	348.70	0.22	69.77	390.33	0.15	103.15	435.78	0.19	56.96	300.57	0.16	67.37	332.45	0.17	72.92	346.75	0.17	96.26	428.55	0.18	107.95	366.60	0.23	61.62	380.75	0.14	126.58	279.61	0.31	77.32	412.41	0.16	102.51	393.82	0.21	0.17666666666666667	0.205	-0.02833333333333332	0.3518801457447849	0.5389385031236016	N
AT1G19650|AT1G19650|1|-	1722.8	6796250	1:6796137-6796451	3.14	74.09	0.04	10.87	56.04	0.16	7.02	64.46	0.10	8.72	33.66	0.21	22.56	23.22	0.49	8.72	56.36	0.13	13.46	41.61	0.24	19.87	47.93	0.29	14.74	94.00	0.14	15.71	88.36	0.15	14.07	75.74	0.16	16.32	110.39	0.13	0.18833333333333332	0.18500000000000003	0.0033333333333332993	1.0	1.0	N
AT1G19660|AT1G19660|1|-	149064.2	6800067	1:6799969-6800268	284.44	914.05	0.24	282.63	926.92	0.23	208.96	836.54	0.20	227.58	733.68	0.24	253.71	803.92	0.24	262.97	1065.95	0.20	308.40	867.46	0.26	473.57	1211.96	0.28	297.19	1055.66	0.22	434.34	1099.16	0.28	483.11	1221.69	0.28	475.64	1192.26	0.29	0.22499999999999998	0.26833333333333337	-0.04333333333333339	0.005005579769687719	0.016953117304494503	N
AT1G19670|AT1G19670|1|-	11632.4	6803770	1:6803486-6804500	428.60	388.96	0.52	489.42	383.77	0.56	391.01	330.64	0.54	402.63	319.04	0.56	421.87	402.90	0.51	368.55	384.22	0.49	135.60	130.47	0.51	232.21	25.11	0.90	253.71	109.81	0.70	317.35	220.58	0.59	521.70	204.16	0.72	368.00	88.03	0.81	0.5300000000000001	0.7050000000000001	-0.17499999999999993	6.426155484410497e-09	7.77791803271463e-08	N
AT1G19690|AT1G19690|1|-	431.1	6807955	1:6807862-6808192	85.33	21.18	0.80	93.19	0.00	1.00	96.60	0.00	1.00	96.49	2.02	0.98	72.06	0.00	1.00	77.09	28.88	0.73	89.11	0.00	1.00	83.65	0.00	1.00	52.60	13.69	0.79	92.71	0.00	1.00	51.16	20.13	0.72	73.99	6.60	0.92	0.9183333333333333	0.9049999999999999	0.01333333333333342	1.0	1.0	N
AT1G19700|AT1G19700|1|-	1700.8	6809876	1:6809585-6810383	63.97	156.75	0.29	74.58	114.71	0.39	52.08	148.03	0.26	45.68	147.92	0.24	36.83	148.60	0.20	50.34	137.79	0.27	73.13	131.98	0.36	90.24	111.37	0.45	80.92	93.47	0.46	96.81	75.13	0.56	101.88	123.62	0.45	71.63	115.36	0.38	0.27499999999999997	0.44333333333333336	-0.1683333333333334	0.000667555753479284	0.0029325824590290205	N
AT1G19710|AT1G19710|1|+	163.3	6816501	1:6816115-6816702	54.70	9.59	0.85	35.87	14.60	0.71	57.62	0.00	1.00	40.19	20.19	0.67	55.76	3.60	0.94	64.58	7.83	0.89	44.19	24.67	0.64	51.45	3.68	0.93	39.56	8.21	0.83	42.88	0.27	0.99	58.91	0.00	1.00	56.21	13.02	0.81	0.8433333333333333	0.8666666666666666	-0.023333333333333317	1.0	1.0	N
AT1G19715|AT1G19715|1|-	29407.6	6817032	1:6816876-6817233	318.91	0.00	1.00	398.55	0.00	1.00	333.50	0.00	1.00	339.33	0.00	1.00	331.97	0.00	1.00	384.49	0.00	1.00	465.22	0.00	1.00	575.69	0.00	1.00	650.13	0.00	1.00	731.29	0.00	1.00	804.10	0.00	1.00	592.15	0.00	1.00	1.0	1.0	0.0	1.0	1.0	N
AT1G19730|AT1G19730|1|-	930.3	6823088	1:6822847-6823306	20.98	58.92	0.26	17.41	74.22	0.19	28.16	57.38	0.33	17.07	98.52	0.15	25.57	43.79	0.37	56.71	36.09	0.61	29.81	128.72	0.19	78.87	167.76	0.32	65.11	153.76	0.30	79.94	87.66	0.48	89.05	158.89	0.36	59.56	134.39	0.31	0.31833333333333336	0.32666666666666666	-0.008333333333333304	0.785832506471521	0.9300640324925564	N
AT1G19740|AT1G19740|1|+	55353.2	6825137	1:6824322-6825459	353.49	108.58	0.77	388.54	97.69	0.80	340.57	165.96	0.67	358.56	142.73	0.72	332.22	186.30	0.64	367.01	121.22	0.75	558.18	232.04	0.71	751.29	139.16	0.84	678.73	221.61	0.75	572.92	278.97	0.67	762.54	63.89	0.92	710.54	69.65	0.91	0.725	0.7999999999999999	-0.07499999999999996	0.001153866790844926	0.004777489291927512	N
AT1G19770|AT1G19770|1|+	9408.2	6832804	1:6832564-6833669	306.26	74.60	0.80	337.55	28.88	0.92	585.40	122.93	0.83	410.55	87.44	0.82	322.88	68.80	0.82	321.84	53.73	0.86	492.43	0.00	1.00	352.26	0.00	1.00	432.76	0.00	1.00	591.58	0.00	1.00	374.05	0.00	1.00	572.30	0.00	1.00	0.8416666666666668	1.0	-0.15833333333333321	2.422730110023878e-24	1.1518980432204438e-22	N
AT1G19800|AT1G19800|1|+	1581.3	6847150	1:6846949-6848128	110.34	33.94	0.76	139.06	0.00	1.00	123.80	1.93	0.98	118.94	7.24	0.94	134.34	0.00	1.00	110.71	62.41	0.64	158.80	0.00	1.00	192.90	0.00	1.00	165.94	4.52	0.97	137.83	0.00	1.00	160.19	0.00	1.00	148.00	0.00	1.00	0.8866666666666666	0.995	-0.10833333333333339	1.2685529248837983e-06	1.0392094323635863e-05	N
AT1G19835|AT1G19835|1|-	2687.2	6856229	1:6855899-6856568	55.09	213.43	0.21	62.15	155.79	0.29	62.09	239.15	0.21	51.34	255.61	0.17	29.84	217.87	0.12	62.17	245.18	0.20	101.58	301.36	0.25	163.77	291.86	0.36	73.58	303.79	0.19	109.64	276.14	0.28	100.05	249.51	0.29	128.84	330.55	0.28	0.19999999999999998	0.275	-0.07500000000000004	0.013766564154276035	0.0399466046836481	N
AT1G19850|AT1G19850|1|+	455.3	6891257	1:6891056-6891382	69.13	44.71	0.61	37.33	54.24	0.41	41.48	37.94	0.52	9.42	56.24	0.14	40.40	42.98	0.48	35.37	56.69	0.38	70.93	25.67	0.73	77.34	35.30	0.69	91.24	29.62	0.75	80.54	24.11	0.77	108.78	10.84	0.91	64.97	52.37	0.55	0.42333333333333334	0.7333333333333334	-0.31000000000000005	3.289257662150367e-05	0.00019821318004116552	N
AT1G19860|AT1G19860|1|-	418.0	6892317	1:6891404-6892518	99.51	0.00	1.00	82.84	9.79	0.89	81.08	0.00	1.00	79.26	16.18	0.83	76.24	25.78	0.75	80.30	0.00	1.00	83.65	0.00	1.00	83.37	0.00	1.00	74.84	0.00	1.00	58.64	14.95	0.80	73.13	1.33	0.98	59.45	0.00	1.00	0.9116666666666667	0.9633333333333333	-0.05166666666666653	0.1874699732250606	0.33487131474697596	N
AT1G19870|AT1G19870|1|-	1984.9	6895218	1:6895009-6895419	43.97	113.26	0.28	41.13	111.96	0.27	60.25	107.81	0.36	34.77	112.33	0.24	73.71	78.89	0.48	44.12	134.56	0.25	123.31	153.30	0.45	221.92	111.36	0.67	200.29	116.41	0.63	175.01	112.73	0.61	196.74	134.04	0.59	217.19	152.77	0.59	0.3133333333333333	0.59	-0.27666666666666667	7.138802895209763e-09	8.546781249361374e-08	N
AT1G19880|AT1G19880|1|-	1216.2	6900577	1:6900337-6900979	69.82	114.37	0.38	85.92	99.97	0.46	62.50	115.97	0.35	59.81	104.86	0.36	54.06	65.41	0.45	56.54	126.35	0.31	96.92	113.94	0.46	79.01	91.65	0.46	77.44	176.76	0.30	103.41	98.62	0.51	87.53	154.30	0.36	90.62	137.16	0.40	0.38499999999999995	0.415	-0.030000000000000027	0.6001519749303812	0.7769182529904577	N
AT1G19910|AT1G19910|1|+	126765.9	6914391	1:6914190-6914518	612.83	476.24	0.56	518.37	618.48	0.46	502.97	567.66	0.47	579.31	631.17	0.48	540.17	613.34	0.47	483.25	609.87	0.44	878.20	707.06	0.55	1250.70	735.74	0.63	1031.30	758.65	0.58	927.99	795.76	0.54	1084.88	664.54	0.62	1137.97	764.74	0.60	0.48	0.5866666666666668	-0.1066666666666668	1.1941005770160392e-08	1.3701821517099748e-07	N
AT1G19920|AT1G19920|1|-	2891.4	6914755	1:6914634-6914969	198.30	237.56	0.45	208.35	185.80	0.53	118.69	209.09	0.36	152.35	218.18	0.41	134.61	166.04	0.45	136.85	240.18	0.36	179.06	155.35	0.54	340.78	183.58	0.65	250.46	183.08	0.58	183.97	176.22	0.51	341.50	223.04	0.60	249.29	123.96	0.67	0.4266666666666666	0.5916666666666667	-0.1650000000000001	3.6621556019398183e-06	2.7361533997350357e-05	N
AT1G19990|AT1G19990|1|+	224.4	6936713	1:6936362-6936898	20.35	36.99	0.35	20.15	24.34	0.45	7.74	32.96	0.19	13.41	20.41	0.40	12.11	36.26	0.25	21.15	30.44	0.41	13.31	45.17	0.23	31.35	48.71	0.39	22.65	31.75	0.42	76.50	25.61	0.75	65.09	15.67	0.81	46.75	42.51	0.52	0.34166666666666673	0.52	-0.1783333333333333	0.024129003125189	0.06421261490492852	N
AT1G20010|AT1G20010|1|-	13544.0	6938009	1:6937719-6938715	139.28	430.54	0.24	114.22	379.39	0.23	171.73	558.77	0.24	83.65	312.56	0.21	137.00	346.51	0.28	90.36	384.23	0.19	254.77	569.32	0.31	350.62	596.66	0.37	290.86	702.07	0.29	296.63	684.76	0.30	340.80	662.88	0.34	330.84	668.17	0.33	0.23166666666666666	0.32333333333333336	-0.0916666666666667	0.0002093057774988618	0.0010547015775893456	N
AT1G20020|AT1G20020|1|+	673638.1	6945002	1:6944801-6945091	35.70	841.95	0.04	34.68	980.16	0.03	33.00	868.55	0.04	31.51	762.10	0.04	27.30	818.52	0.03	35.29	773.26	0.04	93.43	1167.99	0.07	148.09	1622.39	0.08	90.32	1504.54	0.06	136.66	1675.13	0.08	147.48	1998.35	0.07	106.80	1644.57	0.06	0.036666666666666674	0.07	-0.03333333333333333	0.00053891799762343	0.0024397394726123115	N
AT1G20050|AT1G20050|1|+	10764.3	6950171	1:6949856-6950393	114.03	332.25	0.26	134.81	278.51	0.33	105.53	314.78	0.25	114.99	192.16	0.37	130.66	255.91	0.34	110.62	332.89	0.25	175.22	262.99	0.40	233.16	263.28	0.47	156.53	281.98	0.36	158.50	358.49	0.31	212.51	238.16	0.47	242.22	224.19	0.52	0.3	0.42166666666666663	-0.12166666666666665	0.0001285636834284402	0.0006813532385218187	N
AT1G20090|AT1G20090|1|+	4782.5	6968803	1:6968505-6969009	56.10	167.51	0.25	62.31	196.20	0.24	59.99	163.32	0.27	97.07	192.33	0.34	74.73	153.82	0.33	37.32	200.42	0.16	184.33	398.92	0.32	243.47	443.27	0.35	243.41	407.62	0.37	297.48	595.51	0.33	219.20	482.34	0.31	352.18	626.95	0.36	0.265	0.34	-0.07500000000000001	0.026776361433196942	0.07002843192004875	N
AT1G20100|AT1G20100|1|-	2708.5	6969312	1:6969025-6969819	104.54	186.46	0.36	130.30	181.88	0.42	117.14	199.97	0.37	102.95	256.56	0.29	108.40	230.67	0.32	84.36	240.50	0.26	133.31	210.29	0.39	186.88	213.34	0.47	211.78	137.66	0.61	197.32	331.76	0.37	222.49	227.03	0.49	270.42	220.33	0.55	0.33666666666666667	0.48	-0.1433333333333333	7.055458431822541e-05	0.0003965502852772658	N
AT1G20110|AT1G20110|1|+	4028.5	6974708	1:6974501-6975130	25.17	202.14	0.11	20.67	212.13	0.09	17.41	210.03	0.08	24.10	165.86	0.13	17.19	201.60	0.08	15.50	245.56	0.06	25.16	279.86	0.08	31.21	321.04	0.09	13.88	328.02	0.04	25.92	256.21	0.09	25.03	266.54	0.09	30.11	312.84	0.09	0.09166666666666667	0.08	0.011666666666666672	0.7524874212026111	0.9039001796956758	N
AT1G20140|AT1G20140|1|+	1274.8	6987107	1:6986906-6987272	3.56	77.49	0.04	8.82	73.20	0.11	6.27	70.15	0.08	1.92	128.79	0.01	8.54	59.17	0.13	5.40	107.91	0.05	8.61	50.19	0.15	6.67	82.19	0.08	8.65	81.11	0.10	13.07	85.39	0.13	13.42	93.29	0.13	11.03	96.15	0.10	0.06999999999999999	0.11499999999999999	-0.045	0.2808101037958031	0.45773745292870316	N
AT1G20160|AT1G20160|1|-	789.9	6990869	1:6990642-6991426	34.55	64.14	0.35	10.67	107.50	0.09	21.26	49.89	0.30	26.97	60.56	0.31	26.78	78.07	0.26	38.49	53.53	0.42	24.35	101.72	0.19	76.62	50.30	0.60	70.09	65.03	0.52	75.14	32.97	0.70	69.42	102.31	0.40	33.70	27.36	0.55	0.28833333333333333	0.49333333333333335	-0.20500000000000002	0.003046774577700073	0.011110384946277294	N
AT1G20190|AT1G20190|1|-	2109.0	6998837	1:6998335-6999068	68.19	191.73	0.26	36.49	179.72	0.17	88.72	347.74	0.20	51.08	161.09	0.24	54.75	138.94	0.28	60.35	171.49	0.26	110.01	296.96	0.27	114.61	209.38	0.35	109.28	144.15	0.43	53.92	169.18	0.24	107.50	202.43	0.35	155.10	165.72	0.48	0.23500000000000001	0.35333333333333333	-0.11833333333333332	0.0015938399369770154	0.006350873100484167	N
AT1G20200|AT1G20200|1|-	2170.3	7001484	1:7001087-7001921	105.32	177.68	0.37	91.12	167.68	0.35	82.25	186.84	0.31	60.29	224.05	0.21	84.70	156.27	0.35	71.91	182.99	0.28	73.38	227.28	0.24	124.36	144.84	0.46	133.11	112.91	0.54	100.04	143.65	0.41	155.74	127.61	0.55	126.86	164.18	0.44	0.31166666666666665	0.44	-0.12833333333333335	0.0031856809920113964	0.011549110550024534	N
AT1G20220|AT1G20220|1|-	1947.8	7004971	1:7004824-7005181	52.66	225.39	0.19	50.20	166.70	0.23	40.02	198.70	0.17	58.22	174.94	0.25	29.12	160.10	0.15	59.59	166.81	0.26	65.65	207.23	0.24	66.84	251.49	0.21	69.79	268.92	0.21	58.99	250.01	0.19	88.38	242.44	0.27	70.90	274.89	0.21	0.20833333333333334	0.22166666666666665	-0.013333333333333308	0.8333267536636995	0.9660251926220464	N
AT1G20225|AT1G20225|1|-	2035.8	7007912	1:7007756-7008148	120.72	145.15	0.45	72.19	210.77	0.26	111.28	148.63	0.43	84.56	109.29	0.44	97.98	123.57	0.44	70.06	217.74	0.24	123.80	265.20	0.32	205.42	157.92	0.57	179.06	238.96	0.43	176.98	171.53	0.51	181.34	327.76	0.36	203.36	161.77	0.56	0.37666666666666665	0.4583333333333333	-0.08166666666666667	0.049629591428204514	0.11736536173776016	N
AT1G20260|AT1G20260|1|+	23912.4	7020306	1:7020105-7020664	416.17	518.68	0.45	331.94	648.59	0.34	384.26	542.94	0.41	386.58	466.21	0.45	384.31	416.39	0.48	424.04	483.78	0.47	507.31	501.60	0.50	778.46	330.79	0.70	633.69	618.03	0.51	708.87	497.32	0.59	841.70	266.03	0.76	751.91	266.14	0.74	0.4333333333333333	0.6333333333333333	-0.2	4.209751912307831e-19	1.4180442289017937e-17	N
AT1G20270|AT1G20270|1|-	179.6	7020863	1:7020690-7021064	12.60	37.62	0.25	6.25	37.33	0.14	3.09	30.22	0.09	5.77	59.33	0.09	NA	NA	NA	2.94	52.35	0.05	14.26	43.02	0.25	31.05	54.32	0.36	31.33	44.00	0.42	11.56	52.33	0.18	22.52	47.93	0.32	28.64	75.24	0.28	0.124	0.3016666666666667	-0.1776666666666667	0.01851491463699117	0.05129152683238953	N
AT1G20340|AT1G20340|1|-	96847053.0	7042672	1:7042046-7043392	1274.97	22748.51	0.05	1417.32	24723.12	0.05	1003.61	19956.00	0.05	1131.45	24624.32	0.04	1091.45	22965.96	0.05	1030.17	22721.83	0.04	1141.28	23364.09	0.05	1986.08	30388.58	0.06	1525.78	26392.41	0.05	1527.51	24277.32	0.06	2226.84	29094.33	0.07	1804.40	27697.81	0.06	0.04666666666666667	0.05833333333333334	-0.011666666666666672	6.083213481586752e-09	7.38984014260728e-08	N
AT1G20370|AT1G20370|1|-	507.6	7051828	1:7051577-7052269	31.45	35.90	0.47	44.74	0.00	1.00	39.38	25.03	0.61	28.27	37.12	0.43	25.78	15.91	0.62	20.37	41.76	0.33	57.41	11.60	0.83	58.86	13.38	0.81	42.26	20.98	0.67	81.53	0.00	1.00	90.03	16.17	0.85	69.68	0.00	1.00	0.5766666666666668	0.86	-0.2833333333333332	0.00010794903771916287	0.00058489072399963	N
AT1G20440|AT1G20440|1|-	200316.2	7084752	1:7084409-7085180	693.30	872.41	0.44	650.94	1011.86	0.39	780.49	1391.97	0.36	756.08	1314.72	0.37	680.93	1354.46	0.33	686.61	1229.97	0.36	950.14	1795.50	0.35	1130.61	1596.81	0.41	1005.16	1660.22	0.38	1172.58	2128.16	0.36	1040.87	1715.11	0.38	1517.24	2260.12	0.40	0.375	0.37999999999999995	-0.004999999999999949	0.628364870255235	0.8026817991677941	N
AT1G20450|AT1G20450|1|-	53666.2	7088219	1:7087903-7088687	294.33	600.87	0.33	374.49	537.46	0.41	399.59	772.06	0.34	398.20	624.89	0.39	310.75	643.24	0.33	300.17	679.68	0.31	395.36	829.25	0.32	520.02	779.25	0.40	498.69	689.82	0.42	610.72	874.05	0.41	679.21	498.78	0.58	904.52	995.38	0.48	0.35166666666666674	0.435	-0.08333333333333326	2.5188174361450818e-05	0.0001564343053935855	N
AT1G20460|AT1G20460|1|+	330.0	7092987	1:7092786-7093113	75.22	9.62	0.89	78.54	0.00	1.00	78.75	16.16	0.83	62.13	2.89	0.96	62.89	26.22	0.71	62.55	7.20	0.90	89.14	0.91	0.99	119.90	30.08	0.80	110.68	0.00	1.00	126.59	0.00	1.00	118.86	0.15	1.00	108.22	0.00	1.00	0.8816666666666668	0.965	-0.08333333333333315	0.052497616457636065	0.12320945081235937	N
AT1G20510|AT1G20510|1|-	9754.3	7104363	1:7103362-7104564	36.28	11.16	0.76	53.08	0.00	1.00	125.44	12.33	0.91	50.26	9.66	0.84	35.62	7.54	0.83	41.56	16.26	0.72	48.86	22.51	0.68	52.45	0.00	1.00	83.11	0.00	1.00	176.08	15.50	0.92	194.06	0.00	1.00	154.77	8.39	0.95	0.8433333333333333	0.9249999999999999	-0.08166666666666667	0.09589182749333512	0.19826620716742116	N
AT1G20560|AT1G20560|1|-	1835.8	7121192	1:7119671-7121393	150.91	0.00	1.00	146.61	0.00	1.00	139.04	0.00	1.00	176.59	0.00	1.00	159.55	0.00	1.00	164.36	0.00	1.00	123.27	0.00	1.00	102.95	0.00	1.00	129.31	0.00	1.00	124.06	0.00	1.00	117.05	0.00	1.00	121.43	0.00	1.00	1.0	1.0	0.0	1.0	1.0	N
AT1G20575|AT1G20575|1|-	860.5	7126890	1:7126747-7127091	24.85	57.44	0.30	18.20	56.67	0.24	32.65	45.72	0.42	32.93	56.63	0.37	42.80	46.33	0.48	25.46	89.43	0.22	32.94	100.02	0.25	58.93	136.07	0.30	39.55	123.88	0.24	41.35	113.20	0.27	39.68	114.20	0.26	34.79	79.45	0.30	0.3383333333333334	0.27	0.06833333333333336	0.30525491969292073	0.48657653785507754	N
AT1G20580|AT1G20580|1|+	5822.8	7130510	1:7130309-7130799	27.55	295.98	0.09	35.24	273.69	0.11	34.58	270.76	0.11	18.31	203.60	0.08	28.64	222.20	0.11	15.54	253.67	0.06	73.13	391.22	0.16	93.10	511.00	0.15	69.94	436.56	0.14	57.37	427.76	0.12	80.68	577.18	0.12	62.38	594.76	0.09	0.09333333333333334	0.13	-0.03666666666666667	0.13992039380073878	0.2672796911184047	N
AT1G20620|AT1G20620|1|+	6508830.7	7146336	1:7146134-7146540	2386.19	10889.19	0.18	2105.63	9948.49	0.17	2297.45	12160.87	0.16	1545.65	7874.16	0.16	1997.04	9724.27	0.17	1750.56	11670.76	0.13	1996.51	8648.58	0.19	2079.54	7462.99	0.22	1949.63	8803.00	0.18	2279.56	9423.27	0.19	2165.72	7740.20	0.22	2957.92	10919.79	0.21	0.16166666666666668	0.20166666666666666	-0.03999999999999998	3.651751990297997e-15	9.210015108525684e-14	N
AT1G20630|AT1G20630|1|+	4872.6	7149704	1:7149456-7150180	8.27	107.32	0.07	13.88	132.47	0.09	9.32	126.45	0.07	6.72	110.80	0.06	9.02	96.04	0.09	7.60	154.35	0.05	24.14	226.73	0.10	34.88	341.72	0.09	38.49	380.88	0.09	22.38	419.53	0.05	33.88	380.44	0.08	34.68	386.28	0.08	0.07166666666666667	0.08166666666666668	-0.010000000000000009	0.8497981989248976	0.9761235351654961	N
AT1G20640|AT1G20640|1|+	384.7	7157548	1:7157193-7157826	88.08	10.82	0.89	104.72	0.00	1.00	97.51	9.07	0.91	99.46	16.53	0.86	55.20	32.97	0.63	71.07	10.08	0.88	85.58	0.13	1.00	85.21	0.22	1.00	107.50	0.00	1.00	121.52	0.00	1.00	115.62	0.00	1.00	67.76	0.00	1.00	0.8616666666666667	1.0	-0.1383333333333333	0.00016102552921257087	0.0008342600019735749	N
AT1G20650|AT1G20650|1|-	7774.1	7158463	1:7158287-7158682	194.53	288.59	0.40	223.41	245.23	0.48	211.69	416.55	0.34	173.43	201.80	0.46	165.38	289.77	0.36	139.22	316.27	0.31	252.70	358.24	0.41	313.09	420.34	0.43	287.36	590.29	0.33	383.21	353.86	0.52	340.14	445.89	0.43	386.03	383.03	0.50	0.39166666666666666	0.4366666666666667	-0.04500000000000004	0.0963874893717982	0.19879669611613923	N
AT1G20670|AT1G20670|1|-	822.5	7164410	1:7164082-7165217	36.61	45.85	0.44	56.64	16.70	0.77	44.40	61.37	0.42	19.71	58.17	0.25	37.04	37.89	0.49	51.19	62.68	0.45	59.28	36.90	0.62	38.14	40.02	0.49	44.12	41.07	0.52	88.66	0.91	0.99	80.70	0.00	1.00	94.55	5.07	0.95	0.47000000000000003	0.7616666666666667	-0.2916666666666667	4.3327328284823215e-05	0.00025551552591471114	N
AT1G20693|AT1G20693|1|+	252604.9	7178671	1:7178470-7178895	157.09	1703.72	0.08	176.62	1633.45	0.10	151.67	1601.71	0.09	123.30	1240.22	0.09	142.45	1486.53	0.09	122.06	1537.63	0.07	174.41	1803.94	0.09	246.59	2652.52	0.09	184.87	2272.06	0.08	266.03	2461.64	0.10	263.69	2841.48	0.08	267.52	2900.08	0.08	0.08666666666666667	0.08666666666666667	0.0	0.9558470838933254	1.0	N
AT1G20696|AT1G20696|1|+	69530.8	7181358	1:7181157-7181574	38.86	556.69	0.07	30.56	515.23	0.06	32.08	665.16	0.05	47.46	560.52	0.08	30.55	622.94	0.05	46.76	592.30	0.07	57.99	751.40	0.07	108.13	1070.34	0.09	87.29	824.25	0.10	87.74	1065.73	0.08	96.89	1157.00	0.08	132.73	1074.86	0.11	0.06333333333333334	0.08833333333333333	-0.024999999999999994	0.038368678621734875	0.09472535638861601	N
AT1G20760|AT1G20760|1|+	4033.7	7214397	1:7214195-7214993	131.66	21.50	0.86	129.56	12.05	0.91	151.82	31.17	0.83	130.22	59.34	0.69	165.07	0.00	1.00	150.17	0.00	1.00	193.21	23.34	0.89	206.71	0.00	1.00	228.84	0.00	1.00	235.13	0.00	1.00	207.98	3.66	0.98	191.93	0.00	1.00	0.8816666666666667	0.9783333333333334	-0.09666666666666668	5.4869347825078336e-05	0.00031607925179003097	N
AT1G20770|AT1G20770|1|-	557.7	7215194	1:7215010-7215421	31.17	54.88	0.36	53.95	80.58	0.40	32.40	97.85	0.25	20.73	76.09	0.21	28.49	60.53	0.32	24.20	82.09	0.23	49.49	46.58	0.52	86.49	49.33	0.64	91.54	81.12	0.53	94.49	93.46	0.50	65.11	66.64	0.49	102.86	79.48	0.56	0.295	0.5400000000000001	-0.24500000000000016	0.0001148812574777934	0.0006194113160916078	N
AT1G20810|AT1G20810|1|+	33272.2	7233496	1:7233119-7233657	86.37	97.74	0.47	60.68	101.55	0.37	67.59	107.06	0.39	45.86	106.68	0.30	38.01	98.76	0.28	63.89	138.17	0.32	135.94	159.54	0.46	179.37	148.97	0.55	147.39	169.36	0.47	178.60	168.35	0.51	225.96	189.79	0.54	225.15	111.79	0.67	0.355	0.5333333333333333	-0.17833333333333334	0.00015350394557218586	0.000800298377308925	N
AT1G20830|AT1G20830|1|+	363.5	7244779	1:7244578-7244939	34.90	34.17	0.51	18.60	45.00	0.29	26.44	46.43	0.36	18.89	85.04	0.18	27.20	54.83	0.33	11.31	48.15	0.19	42.10	46.88	0.47	84.08	39.48	0.68	41.55	108.37	0.28	10.43	76.34	0.12	75.61	48.81	0.61	66.32	76.42	0.46	0.31	0.4366666666666666	-0.1266666666666666	0.048528614386260556	0.1152003920583543	N
AT1G20840|AT1G20840|1|-	185.6	7245343	1:7244978-7245557	45.93	6.40	0.88	37.71	15.47	0.71	68.15	25.56	0.73	45.78	9.28	0.83	45.12	36.50	0.55	57.38	1.84	0.97	71.94	41.98	0.63	85.47	0.00	1.00	105.11	32.62	0.76	82.12	2.85	0.97	72.79	0.00	1.00	98.14	0.00	1.00	0.7783333333333333	0.8933333333333332	-0.11499999999999988	0.08706362202736721	0.1843239802401946	N
AT1G20850|AT1G20850|1|+	4487.6	7253598	1:7253322-7253747	79.06	120.99	0.40	141.42	128.95	0.52	102.60	141.94	0.42	73.30	71.13	0.51	88.30	137.54	0.39	87.10	135.87	0.39	164.55	162.03	0.50	202.66	186.96	0.52	203.62	117.08	0.63	150.42	185.98	0.45	200.18	118.17	0.63	173.67	128.66	0.57	0.4383333333333334	0.5499999999999999	-0.11166666666666653	0.01134546336030326	0.034101593893325316	N
AT1G20880|AT1G20880|1|-	230.1	7262391	1:7262009-7262592	48.80	26.73	0.65	42.78	46.78	0.48	48.85	34.36	0.59	40.18	42.74	0.48	51.36	25.63	0.67	37.90	37.46	0.50	62.95	16.25	0.79	81.06	39.06	0.67	54.39	35.85	0.60	71.05	14.00	0.84	66.29	11.56	0.85	88.20	10.67	0.89	0.5616666666666666	0.7733333333333333	-0.21166666666666667	0.005183446043245287	0.017461143929397984	N
AT1G20890|AT1G20890|1|-	1529.6	7266058	1:7265794-7266432	19.14	29.47	0.39	22.68	37.66	0.38	24.00	35.80	0.40	33.13	5.19	0.86	30.43	26.39	0.54	29.47	32.21	0.48	25.46	34.93	0.42	49.95	15.83	0.76	36.83	57.80	0.39	37.25	39.79	0.48	25.65	50.35	0.34	55.59	19.00	0.75	0.5083333333333333	0.5233333333333333	-0.015000000000000013	0.858060635926028	0.9806266290048234	N
AT1G20910|AT1G20910|1|-	1850.1	7277096	1:7276943-7277489	70.19	0.00	1.00	69.14	0.00	1.00	54.36	13.24	0.80	58.47	0.00	1.00	42.44	8.98	0.83	72.47	0.00	1.00	59.01	1.24	0.98	88.70	0.00	1.00	67.08	0.00	1.00	92.03	0.00	1.00	113.58	0.00	1.00	101.91	0.00	1.00	0.9383333333333334	0.9966666666666667	-0.05833333333333335	0.07407262545001993	0.16248558037458014	N
AT1G20920|AT1G20920|1|+	4675.3	7286409	1:7285042-7289730	133.08	21.36	0.86	125.65	8.03	0.94	130.28	20.37	0.86	132.71	18.03	0.88	119.82	29.19	0.80	138.30	0.00	1.00	121.55	42.41	0.74	92.41	150.83	0.38	120.73	100.90	0.54	116.74	146.22	0.44	94.39	170.35	0.36	88.44	182.14	0.33	0.89	0.465	0.425	1.0256416757032577e-19	3.588662440656082e-18	N
AT1G20950|AT1G20950|1|-	1139.3	7297379	1:7297239-7297580	60.63	52.62	0.54	49.67	55.65	0.47	43.47	76.65	0.36	35.65	54.74	0.39	32.39	63.72	0.34	47.05	49.70	0.49	62.03	107.03	0.37	135.16	63.68	0.68	87.43	83.63	0.51	90.90	36.41	0.71	93.08	110.46	0.46	65.60	115.00	0.36	0.43166666666666664	0.515	-0.08333333333333337	0.26181597914890775	0.43498836060904467	N
AT1G20960|AT1G20960|1|-	2086.1	7301843	1:7301599-7302051	23.77	185.60	0.11	36.80	176.77	0.17	33.26	205.73	0.14	24.35	239.89	0.09	31.16	143.98	0.18	22.98	178.84	0.11	32.02	196.85	0.14	70.34	247.15	0.22	44.06	255.99	0.15	55.29	243.99	0.18	78.54	221.06	0.26	37.70	245.68	0.13	0.13333333333333333	0.18000000000000002	-0.04666666666666669	0.13938779036456342	0.26631349218470807	N
AT1G20970|AT1G20970|1|+	3715.1	7319209	1:7318887-7319921	16.37	259.93	0.06	16.93	224.64	0.07	21.81	197.11	0.10	20.61	269.99	0.07	15.08	184.52	0.08	23.16	206.84	0.10	40.54	346.22	0.10	47.99	317.39	0.13	34.75	336.32	0.09	40.18	350.54	0.10	30.59	323.59	0.09	49.20	373.11	0.12	0.08000000000000002	0.105	-0.02499999999999998	0.2573988544606808	0.42980548088989834	N
AT1G20980|AT1G20980|1|+	1733.2	7329099	1:7328514-7329441	45.64	161.14	0.22	42.77	153.85	0.22	57.51	139.29	0.29	74.34	110.63	0.40	43.27	121.95	0.26	52.27	154.38	0.25	80.41	102.15	0.44	77.82	97.77	0.44	67.14	86.49	0.44	94.56	100.07	0.49	64.50	126.53	0.34	115.30	112.75	0.51	0.2733333333333333	0.44333333333333336	-0.17000000000000004	0.0005753370791130102	0.002573938010113309	N
AT1G21000|AT1G21000|1|+	13434.4	7339073	1:7338771-7339452	170.33	566.88	0.23	184.35	753.57	0.20	232.99	907.73	0.20	114.08	455.42	0.20	174.80	590.86	0.23	179.24	579.24	0.24	256.41	748.40	0.26	345.37	797.14	0.30	269.15	1022.13	0.21	223.67	939.39	0.19	272.59	787.91	0.26	365.30	929.91	0.28	0.21666666666666667	0.25	-0.033333333333333326	0.075450535565042	0.16470825393449526	N
AT1G21060|AT1G21060|1|+	412.9	7373964	1:7373762-7374114	131.32	29.27	0.82	128.87	33.37	0.79	127.02	45.12	0.74	102.32	50.18	0.67	116.52	71.10	0.62	148.70	47.17	0.76	189.49	47.22	0.80	219.45	31.07	0.88	192.67	48.88	0.80	145.44	4.43	0.97	180.92	58.59	0.76	189.57	39.01	0.83	0.7333333333333333	0.84	-0.10666666666666669	0.018611474884357406	0.051530294211719015	N
AT1G21070|AT1G21070|1|-	178.1	7376143	1:7375869-7376507	26.89	12.49	0.68	23.87	13.80	0.63	26.20	12.45	0.68	28.26	7.64	0.79	25.04	12.24	0.67	23.05	23.59	0.49	15.25	22.61	0.40	57.14	0.00	1.00	34.05	23.86	0.59	63.45	0.00	1.00	46.87	0.00	1.00	43.23	3.41	0.93	0.6566666666666667	0.82	-0.16333333333333322	0.04811922973326919	0.11441990568545009	N
AT1G21080|AT1G21080|1|-	5384.8	7378725	1:7378538-7378926	41.75	161.45	0.21	30.02	183.26	0.14	32.04	168.64	0.16	36.70	196.25	0.16	28.53	180.02	0.14	19.15	188.53	0.09	28.90	214.69	0.12	50.15	249.41	0.17	39.59	229.15	0.15	37.13	179.07	0.17	30.74	222.95	0.12	58.85	243.36	0.19	0.15	0.15333333333333335	-0.003333333333333355	1.0	1.0	N
AT1G21090|AT1G21090|1|+	179.0	7386024	1:7385638-7386580	21.44	26.97	0.44	25.09	38.90	0.39	13.70	48.62	0.22	11.94	49.17	0.20	14.62	17.14	0.46	24.20	22.33	0.52	19.21	29.47	0.39	16.97	32.32	0.34	9.52	24.17	0.28	18.11	18.40	0.50	29.88	9.87	0.75	16.31	26.70	0.38	0.37166666666666665	0.43999999999999995	-0.0683333333333333	0.5194812455289715	0.7039484086739076	N
AT1G21100|AT1G21100|1|-	3595.4	7387028	1:7386762-7387290	101.12	158.75	0.39	124.78	125.38	0.50	137.46	356.21	0.28	109.59	136.84	0.44	104.98	182.60	0.37	101.89	217.82	0.32	124.44	225.21	0.36	227.43	200.02	0.53	118.46	209.61	0.36	156.31	226.83	0.41	112.23	297.48	0.27	152.40	319.21	0.32	0.3833333333333333	0.375	0.008333333333333304	0.8137173839208849	0.9526283746491321	N
AT1G21110|AT1G21110|1|-	137.8	7390208	1:7389981-7390409	50.82	17.11	0.75	32.87	27.73	0.54	49.98	38.84	0.56	51.50	55.32	0.48	50.02	14.08	0.78	33.85	29.34	0.54	51.20	12.35	0.81	42.24	0.00	1.00	7.63	30.50	0.20	17.23	26.25	0.40	49.83	0.00	1.00	36.79	0.00	1.00	0.6083333333333334	0.735	-0.1266666666666666	0.07827662885894705	0.169587533230269	N
AT1G21130|AT1G21130|1|-	248268.5	7399133	1:7398814-7399930	55.68	492.38	0.10	56.28	502.01	0.10	108.39	913.27	0.11	43.90	515.70	0.08	67.07	456.87	0.13	50.13	530.58	0.09	179.59	1326.51	0.12	256.33	1187.46	0.18	200.26	1398.24	0.13	279.18	1518.00	0.16	216.28	1144.43	0.16	351.64	1682.73	0.17	0.10166666666666667	0.15333333333333335	-0.05166666666666668	0.00105505035849222	0.004412472816640231	N
AT1G21170|AT1G21170|1|+	311.7	7419460	1:7419196-7419643	27.15	46.14	0.37	17.74	37.04	0.32	33.65	34.72	0.49	41.34	25.05	0.62	27.15	38.93	0.41	32.53	37.70	0.46	58.34	26.51	0.69	62.35	20.08	0.76	14.40	57.05	0.20	33.29	51.79	0.39	43.00	31.30	0.58	29.66	76.35	0.28	0.445	0.4833333333333334	-0.038333333333333386	0.740569211966983	0.8944565915975401	N
AT1G21190|AT1G21190|1|-	3316.8	7419832	1:7419664-7420069	43.66	171.05	0.20	35.60	188.05	0.16	31.14	184.84	0.14	25.59	158.08	0.14	35.72	197.19	0.15	47.91	228.87	0.17	45.84	214.86	0.18	70.91	318.39	0.18	47.60	284.50	0.14	27.46	255.61	0.10	60.84	361.44	0.14	80.48	306.17	0.21	0.16	0.15833333333333333	0.0016666666666666774	1.0	1.0	N
AT1G21270|AT1G21270|1|+	756.3	7446351	1:7446150-7447490	89.15	3.63	0.96	73.21	26.85	0.73	119.89	0.00	1.00	96.33	15.25	0.86	76.68	6.03	0.93	92.39	21.49	0.81	104.24	0.00	1.00	70.52	0.00	1.00	71.79	0.00	1.00	87.53	0.00	1.00	67.92	0.00	1.00	96.10	0.00	1.00	0.8816666666666665	1.0	-0.11833333333333351	0.0006526540147774258	0.00287985033074746	N
AT1G21310|AT1G21310|1|-	321841.2	7453366	1:7453245-7453567	996.65	868.46	0.53	920.36	713.43	0.56	967.64	837.22	0.54	823.76	707.25	0.54	1053.69	1213.91	0.46	1316.96	1930.45	0.41	485.90	601.28	0.45	523.52	674.88	0.44	497.67	487.49	0.51	476.24	574.79	0.45	356.77	472.64	0.43	527.23	543.75	0.49	0.5066666666666667	0.4616666666666666	0.045000000000000095	0.10116442106623907	0.20620940556619852	N
AT1G21313|AT1G21313|1|+	82783.0	7454016	1:7453815-7454256	3396.37	63.41	0.98	2990.96	299.80	0.91	3835.67	178.82	0.96	3298.83	219.40	0.94	4732.60	70.85	0.99	6008.21	286.94	0.95	2159.19	0.00	1.00	1062.49	325.68	0.77	1305.63	24.71	0.98	1185.04	86.48	0.93	846.69	207.39	0.80	997.09	214.09	0.82	0.9550000000000001	0.8833333333333334	0.07166666666666666	4.173128013315584e-14	9.46766508409063e-13	N
AT1G21370|AT1G21370|1|+	250.2	7485495	1:7485134-7485636	28.09	14.87	0.65	22.60	27.63	0.45	42.12	3.99	0.91	20.60	18.17	0.53	35.48	13.14	0.73	24.01	17.28	0.58	67.72	0.00	1.00	41.31	27.84	0.60	63.81	0.00	1.00	38.61	28.00	0.58	48.25	19.78	0.71	68.45	0.00	1.00	0.6416666666666667	0.8150000000000001	-0.17333333333333334	0.06875006306471357	0.15276596079473584	N
AT1G21380|AT1G21380|1|-	1594.6	7486214	1:7485666-7486415	157.66	0.00	1.00	154.86	0.00	1.00	175.41	0.00	1.00	191.20	0.00	1.00	179.43	0.00	1.00	203.03	0.00	1.00	208.23	0.00	1.00	204.99	0.00	1.00	213.16	0.00	1.00	214.93	0.00	1.00	174.74	0.00	1.00	234.30	0.00	1.00	1.0	1.0	0.0	1.0	1.0	N
AT1G21400|AT1G21400|1|+	22193.4	7496323	1:7496073-7496741	41.99	589.95	0.07	26.85	730.33	0.04	57.28	736.14	0.07	29.92	589.68	0.05	25.91	624.29	0.04	24.73	575.44	0.04	66.68	914.44	0.07	84.93	1211.35	0.07	62.54	1057.70	0.06	91.43	1226.72	0.07	134.30	1316.48	0.09	122.67	1464.75	0.08	0.051666666666666666	0.07333333333333333	-0.021666666666666667	0.06676619783645357	0.1493260652488947	N
AT1G21410|AT1G21410|1|+	2202.1	7499272	1:7499013-7499616	115.49	120.38	0.49	127.42	181.86	0.41	107.93	125.76	0.46	100.43	104.42	0.49	97.13	114.87	0.46	76.64	126.04	0.38	144.39	192.80	0.43	232.72	118.81	0.66	236.97	176.31	0.57	178.70	129.74	0.58	198.06	60.81	0.77	226.89	139.15	0.62	0.4483333333333333	0.6050000000000001	-0.1566666666666668	0.00046453047173344105	0.0021420135951810693	N
AT1G21440|AT1G21440|1|-	2727.8	7502489	1:7502186-7502690	298.60	101.09	0.75	236.97	136.25	0.63	257.70	141.50	0.65	238.67	82.41	0.74	239.80	118.92	0.67	394.99	108.34	0.78	294.44	142.81	0.67	343.95	105.44	0.77	393.02	132.34	0.75	419.57	145.90	0.74	562.33	0.00	1.00	423.55	0.00	1.00	0.7033333333333333	0.8216666666666667	-0.1183333333333334	7.071735688593077e-05	0.0003972404609245303	N
AT1G21450|AT1G21450|1|+	3346.8	7509912	1:7509711-7511750	184.58	0.00	1.00	214.47	0.00	1.00	228.45	0.00	1.00	177.72	9.54	0.95	203.64	0.00	1.00	199.41	0.00	1.00	201.96	0.00	1.00	189.12	0.00	1.00	213.66	0.00	1.00	220.20	0.00	1.00	166.44	0.00	1.00	171.34	0.00	1.00	0.9916666666666667	1.0	-0.008333333333333304	1.0	1.0	N
AT1G21460|AT1G21460|1|-	141.3	7511941	1:7511801-7512206	13.10	26.86	0.33	24.93	21.95	0.53	16.69	27.51	0.38	24.55	13.09	0.65	25.00	16.91	0.60	14.89	23.98	0.38	29.78	36.07	0.45	29.39	27.87	0.51	46.65	34.01	0.58	14.67	40.60	0.27	26.69	59.20	0.31	50.23	30.04	0.63	0.47833333333333333	0.4583333333333333	0.020000000000000018	1.0	1.0	N
AT1G21480|AT1G21480|1|-	1280.3	7519124	1:7518946-7519581	23.13	28.32	0.45	24.98	26.48	0.49	25.14	22.95	0.52	21.28	31.16	0.41	14.79	38.86	0.28	20.45	38.38	0.35	46.01	29.99	0.61	46.24	37.23	0.55	51.61	26.27	0.66	52.01	13.78	0.79	91.25	0.00	1.00	37.63	34.15	0.52	0.4166666666666667	0.6883333333333335	-0.2716666666666668	0.0010371095962095275	0.004348421121322395	N
AT1G21500|AT1G21500|1|-	363544.2	7530024	1:7529705-7530302	502.33	2765.14	0.15	532.45	3204.01	0.14	408.65	2508.03	0.14	451.33	2945.70	0.13	450.30	2777.13	0.14	355.66	3101.79	0.10	553.38	3382.86	0.14	708.91	4037.09	0.15	487.13	4044.04	0.11	530.21	3624.16	0.13	709.63	3862.39	0.16	669.94	3431.09	0.16	0.13333333333333333	0.1416666666666667	-0.00833333333333336	0.5045276559238839	0.6899932998782872	N
AT1G21560|AT1G21560|1|+	329.5	7556922	1:7556721-7557112	13.78	59.19	0.19	20.39	44.67	0.31	11.44	45.64	0.20	3.47	45.52	0.07	19.51	51.97	0.27	18.29	79.12	0.19	14.27	40.23	0.26	18.62	104.40	0.15	13.58	63.70	0.18	14.40	49.17	0.23	34.65	76.19	0.31	19.92	42.50	0.32	0.205	0.2416666666666667	-0.03666666666666671	0.6972553576534866	0.8609128341206134	N
AT1G21580|AT1G21580|1|-	3539.0	7558767	1:7557140-7559031	94.91	47.69	0.67	99.68	44.68	0.69	99.79	34.99	0.74	102.53	58.56	0.64	94.64	17.97	0.84	102.23	0.00	1.00	105.15	0.00	1.00	99.82	1.43	0.99	125.94	0.00	1.00	95.31	0.00	1.00	95.20	0.00	1.00	91.06	0.00	1.00	0.7633333333333333	0.9983333333333334	-0.2350000000000001	8.171723994120335e-10	1.1108402370666726e-08	N
AT1G21590|AT1G21590|1|-	1716.3	7566616	1:7566229-7566858	181.20	254.78	0.42	164.12	290.41	0.36	192.37	249.03	0.44	148.33	153.24	0.49	172.61	240.77	0.42	148.39	251.42	0.37	148.45	142.32	0.51	216.00	89.26	0.71	164.16	201.27	0.45	119.07	204.65	0.37	179.31	207.92	0.46	134.44	187.06	0.42	0.4166666666666667	0.48666666666666664	-0.06999999999999995	0.0625635881811314	0.14187457228569209	N
AT1G21600|AT1G21600|1|-	7180.9	7571297	1:7570845-7571630	30.42	290.37	0.09	34.25	257.62	0.12	30.16	278.58	0.10	27.87	301.27	0.08	29.03	252.21	0.10	34.52	339.77	0.09	44.09	432.64	0.09	67.22	622.86	0.10	75.37	461.98	0.14	95.64	625.32	0.13	96.98	519.36	0.16	94.92	567.97	0.14	0.09666666666666666	0.12666666666666668	-0.030000000000000013	0.19853370892089167	0.350476010933896	N
AT1G21610|AT1G21610|1|+	721.9	7578644	1:7578251-7578963	74.55	77.87	0.49	69.02	59.07	0.54	76.65	71.21	0.52	90.00	24.94	0.78	91.73	29.55	0.76	94.28	100.40	0.48	106.17	93.97	0.53	134.16	33.67	0.80	144.90	54.92	0.73	148.58	36.32	0.80	118.20	49.68	0.70	148.25	25.36	0.85	0.595	0.735	-0.14	0.004239287946311529	0.01471386808330341	N
AT1G21630|AT1G21630|1|+	2886.2	7587077	1:7586876-7588153	240.50	0.00	1.00	203.72	11.84	0.95	224.24	4.54	0.98	214.01	70.32	0.75	218.97	0.00	1.00	247.77	0.00	1.00	295.00	0.00	1.00	228.85	0.00	1.00	246.32	0.00	1.00	235.73	0.00	1.00	175.13	0.00	1.00	250.87	0.00	1.00	0.9466666666666667	1.0	-0.053333333333333344	0.00010026460819077398	0.0005474337426328137	N
AT1G21660|AT1G21660|1|+	1625.0	7608998	1:7608797-7609223	13.16	69.44	0.16	5.92	82.48	0.07	10.77	87.44	0.11	3.70	89.54	0.04	8.64	80.32	0.10	7.00	100.93	0.06	6.27	176.15	0.03	10.06	192.93	0.05	2.89	217.34	0.01	10.39	125.50	0.08	6.04	199.27	0.03	8.19	209.96	0.04	0.09000000000000001	0.04	0.05000000000000001	0.09201474417900031	0.19205009722888597	N
AT1G21690|AT1G21690|1|+	2793.1	7618471	1:7618270-7618628	12.72	77.85	0.14	6.44	118.45	0.05	7.26	78.22	0.08	7.69	91.03	0.08	5.58	73.13	0.07	7.11	53.88	0.12	4.15	112.93	0.04	20.75	125.70	0.14	7.09	141.51	0.05	6.56	140.51	0.04	12.63	153.58	0.08	20.83	164.06	0.11	0.09000000000000001	0.07666666666666667	0.013333333333333336	1.0	1.0	N
AT1G21700|AT1G21700|1|-	1523.4	7620530	1:7620001-7620731	124.86	0.00	1.00	117.18	0.00	1.00	115.86	0.00	1.00	130.18	0.00	1.00	104.49	0.00	1.00	144.81	0.00	1.00	132.87	0.00	1.00	99.22	0.00	1.00	130.70	0.00	1.00	93.57	0.00	1.00	108.60	0.00	1.00	106.95	0.00	1.00	1.0	1.0	0.0	1.0	1.0	N
AT1G21710|AT1G21710|1|+	334.4	7625904	1:7625627-7626138	68.64	17.59	0.80	51.50	44.93	0.53	43.17	33.50	0.56	52.56	31.33	0.63	36.49	72.22	0.34	70.89	29.31	0.71	76.31	51.70	0.60	98.90	0.00	1.00	71.96	16.44	0.81	48.11	76.18	0.39	60.18	59.37	0.50	121.40	30.08	0.80	0.595	0.6833333333333335	-0.08833333333333349	0.19242608593915791	0.34181945226625177	N
AT1G21730|AT1G21730|1|+	330.1	7636288	1:7636050-7636658	35.46	29.90	0.54	40.92	8.69	0.82	57.52	16.72	0.77	22.82	22.64	0.50	28.50	27.73	0.51	31.77	26.60	0.54	68.54	33.11	0.67	80.55	36.80	0.69	104.14	0.00	1.00	84.48	64.71	0.57	78.98	20.14	0.80	88.21	31.21	0.74	0.6133333333333333	0.745	-0.1316666666666667	0.15958780124394645	0.29564205461616255	N
AT1G21750|AT1G21750|1|+	5905.6	7648632	1:7648305-7648855	195.84	293.44	0.40	195.79	245.12	0.44	166.10	312.15	0.35	175.79	296.43	0.37	182.92	315.22	0.37	189.06	407.19	0.32	158.62	260.46	0.38	215.89	255.64	0.46	209.78	284.38	0.42	167.25	310.98	0.35	221.05	343.66	0.39	215.39	270.88	0.44	0.375	0.4066666666666667	-0.031666666666666676	0.26560984450481767	0.4390891739884168	N
AT1G21780|AT1G21780|1|+	1864.3	7653487	1:7653261-7654014	184.39	54.06	0.77	176.37	87.29	0.67	206.66	72.12	0.74	197.20	0.00	1.00	230.35	41.25	0.85	251.54	21.32	0.92	255.86	70.43	0.78	310.09	0.00	1.00	311.78	0.00	1.00	246.56	0.00	1.00	294.28	0.00	1.00	322.10	0.00	1.00	0.8249999999999998	0.9633333333333334	-0.13833333333333353	1.4754034750982422e-08	1.6698273726709832e-07	N
AT1G21790|AT1G21790|1|+	207.5	7655676	1:7655362-7655981	25.37	36.64	0.41	23.19	29.93	0.44	23.61	43.09	0.35	26.56	24.49	0.52	51.10	0.00	1.00	37.19	3.75	0.91	50.96	15.04	0.77	49.44	49.11	0.50	19.74	69.02	0.22	38.80	36.73	0.51	50.02	21.84	0.70	60.73	24.85	0.71	0.605	0.5683333333333334	0.036666666666666625	0.7238640922230934	0.8824574921614609	N
AT1G21830|AT1G21830|1|-	2383.0	7661448	1:7660947-7661784	36.45	203.23	0.15	50.46	275.50	0.15	62.37	389.77	0.14	21.55	122.22	0.15	46.30	213.34	0.18	34.13	226.94	0.13	62.55	314.43	0.17	67.65	240.02	0.22	57.53	241.16	0.19	70.63	319.70	0.18	90.29	256.23	0.26	106.21	339.18	0.24	0.15	0.21	-0.06	0.049555098718459804	0.11721709496913474	N
AT1G21880|AT1G21880|1|+	327.3	7682466	1:7682255-7682584	70.98	26.19	0.73	133.66	0.00	1.00	76.54	14.31	0.84	77.35	0.00	1.00	66.19	21.72	0.75	43.56	42.97	0.50	127.01	51.47	0.71	86.44	38.18	0.69	98.48	15.49	0.86	86.87	64.51	0.57	88.93	52.32	0.63	95.35	11.99	0.89	0.8033333333333333	0.725	0.07833333333333337	0.08483744428931636	0.18106307643963418	N
AT1G21900|AT1G21900|1|-	980.9	7691049	1:7690802-7691309	52.19	92.38	0.36	41.83	98.91	0.30	42.06	103.83	0.29	42.53	101.07	0.30	27.47	116.67	0.19	51.68	67.57	0.43	60.98	81.26	0.43	60.22	153.71	0.28	83.17	79.42	0.51	103.68	106.56	0.49	78.99	171.76	0.32	78.62	172.00	0.31	0.31166666666666665	0.38999999999999996	-0.07833333333333331	0.16761600339638094	0.3069664994010021	N
AT1G21920|AT1G21920|1|-	25209.4	7704689	1:7704173-7704918	167.18	253.80	0.40	163.05	267.56	0.38	213.42	340.38	0.39	159.02	200.73	0.44	189.28	236.67	0.44	199.10	293.17	0.40	295.15	342.82	0.46	452.95	396.90	0.53	336.09	436.86	0.43	395.30	367.72	0.52	362.42	283.05	0.56	391.27	320.85	0.55	0.40833333333333327	0.5083333333333333	-0.10000000000000003	0.0005958006298618856	0.0026537296543870715	N
AT1G21930|AT1G21930|1|+	739.7	7714315	1:7714052-7714459	87.97	69.32	0.56	59.87	120.90	0.33	72.06	112.64	0.39	89.57	76.97	0.54	88.98	93.34	0.49	90.95	76.17	0.54	138.92	73.50	0.65	210.07	116.85	0.64	203.82	79.55	0.72	136.94	67.40	0.67	256.71	50.31	0.84	227.02	68.29	0.77	0.4750000000000001	0.7149999999999999	-0.23999999999999977	1.3951095607006237e-07	1.3433336923141566e-06	N
AT1G21980|AT1G21980|1|+	1057.8	7738377	1:7738009-7738772	62.52	57.54	0.52	41.49	76.02	0.35	47.52	86.65	0.35	58.94	95.72	0.38	34.21	100.31	0.25	41.57	107.11	0.28	53.73	62.91	0.46	74.77	55.39	0.57	53.02	51.02	0.51	45.19	44.77	0.50	77.53	40.01	0.66	74.12	74.25	0.50	0.355	0.5333333333333333	-0.17833333333333334	0.003356910125985814	0.012086092725333708	N
AT1G22020|AT1G22020|1|+	868.4	7757239	1:7756864-7758029	10.51	94.42	0.10	10.47	127.05	0.08	8.03	104.49	0.07	16.69	111.18	0.13	10.17	131.46	0.07	12.61	100.76	0.11	12.89	121.61	0.10	14.63	137.70	0.10	10.08	121.81	0.08	21.40	137.34	0.13	19.29	143.13	0.12	16.97	150.67	0.10	0.09333333333333334	0.105	-0.011666666666666659	0.8381289552841371	0.9697616514770869	N
AT1G22060|AT1G22060|1|-	1543.5	7773337	1:7773154-7773649	94.68	60.52	0.61	79.04	59.26	0.57	69.09	79.84	0.46	53.24	93.16	0.36	83.80	53.11	0.61	80.81	29.59	0.73	101.39	81.86	0.55	110.17	87.86	0.56	122.97	97.44	0.56	174.40	97.55	0.64	180.33	84.99	0.68	141.53	147.78	0.49	0.5566666666666666	0.5800000000000001	-0.023333333333333428	0.5891770453038585	0.7683270733837851	N
AT1G22070|AT1G22070|1|+	856.5	7791893	1:7791669-7792139	72.10	73.49	0.50	45.21	86.53	0.34	68.71	82.06	0.46	29.09	74.43	0.28	56.14	72.84	0.44	85.34	53.24	0.62	69.87	89.60	0.44	96.08	112.14	0.46	90.99	109.92	0.45	111.37	86.40	0.56	183.90	23.43	0.89	137.26	91.63	0.60	0.44	0.5666666666666668	-0.12666666666666676	0.032576505496266124	0.08234869883398538	N
AT1G22140|AT1G22140|1|-	38766.0	7815091	1:7814738-7815292	129.10	289.59	0.31	125.26	290.36	0.30	135.89	245.94	0.36	134.83	197.14	0.41	140.48	311.60	0.31	162.64	389.39	0.29	194.78	341.04	0.36	294.19	476.53	0.38	238.10	519.17	0.31	207.36	407.04	0.34	300.81	453.53	0.40	234.46	507.82	0.32	0.33	0.3516666666666666	-0.021666666666666612	0.3639951742610683	0.5534843223614745	N
AT1G22160|AT1G22160|1|+	1181.6	7823846	1:7823627-7823971	70.77	121.65	0.37	44.75	118.92	0.27	76.45	108.69	0.41	69.88	60.94	0.53	70.03	112.51	0.38	67.91	123.63	0.35	82.21	103.73	0.44	82.88	115.60	0.42	105.09	150.75	0.41	76.20	113.70	0.40	76.04	98.26	0.44	114.33	75.24	0.60	0.385	0.45166666666666666	-0.06666666666666665	0.2059250318429407	0.3606783637052837	N
AT1G22170|AT1G22170|1|+	120.3	7828200	1:7827999-7828326	18.81	23.79	0.44	17.65	26.20	0.40	16.97	13.79	0.55	19.73	23.66	0.45	9.97	41.18	0.19	21.24	26.33	0.45	42.16	34.67	0.55	42.16	38.87	0.52	29.00	13.86	0.68	30.47	41.27	0.42	43.75	7.55	0.85	39.22	7.97	0.83	0.4133333333333334	0.6416666666666667	-0.22833333333333333	0.048144933887866406	0.11445363828797332	N
AT1G22190|AT1G22190|1|+	36306.4	7835982	1:7835781-7837411	224.92	0.00	1.00	283.75	0.00	1.00	306.55	0.00	1.00	195.10	0.00	1.00	220.04	0.00	1.00	200.21	0.00	1.00	329.83	0.00	1.00	372.33	0.00	1.00	313.26	0.00	1.00	344.01	0.00	1.00	318.12	0.00	1.00	408.10	0.00	1.00	1.0	1.0	0.0	1.0	1.0	N
AT1G22200|AT1G22200|1|-	726.1	7837705	1:7837563-7837948	59.52	44.07	0.57	32.74	74.53	0.31	56.97	72.86	0.44	37.85	78.70	0.32	37.59	75.28	0.33	52.48	70.44	0.43	91.01	54.31	0.63	110.77	152.26	0.42	111.46	61.10	0.65	52.95	143.10	0.27	154.67	95.87	0.62	105.34	111.40	0.49	0.39999999999999997	0.5133333333333333	-0.11333333333333334	0.08164449097048804	0.17530278884480113	N
AT1G22280|AT1G22280|1|+	902.4	7875705	1:7875359-7876018	12.93	110.56	0.10	20.22	140.54	0.13	18.05	159.24	0.10	23.75	145.68	0.14	17.52	132.67	0.12	20.94	163.87	0.11	17.18	184.38	0.09	27.35	183.40	0.13	26.92	144.47	0.16	34.39	197.70	0.15	28.81	227.14	0.11	35.42	241.64	0.13	0.11666666666666668	0.12833333333333333	-0.011666666666666645	0.7520802633111595	0.9037878312399313	N
AT1G22300|AT1G22300|1|-	53169.1	7878918	1:7878759-7879151	146.11	690.86	0.17	140.36	745.20	0.16	168.45	655.22	0.20	174.21	644.34	0.21	149.26	641.23	0.19	155.33	774.67	0.17	262.23	793.05	0.25	426.13	850.55	0.33	379.51	841.88	0.31	351.31	768.30	0.31	405.64	1142.36	0.26	396.56	817.82	0.33	0.18333333333333332	0.2983333333333334	-0.11500000000000007	1.6535385515955603e-09	2.1734408184133705e-08	N
AT1G22310|AT1G22310|1|-	276.1	7881695	1:7881503-7882179	27.71	28.39	0.49	36.00	29.73	0.55	31.42	39.41	0.44	22.60	33.66	0.40	34.59	31.48	0.52	30.32	40.40	0.43	63.48	24.73	0.72	103.38	0.00	1.00	67.29	21.73	0.76	94.38	7.07	0.93	62.83	24.09	0.72	96.26	18.49	0.84	0.4716666666666667	0.8283333333333333	-0.3566666666666666	3.081731668584644e-06	2.3412207638169424e-05	N
AT1G22330|AT1G22330|1|+	1009.6	7889336	1:7889135-7889534	12.19	56.46	0.18	14.66	19.15	0.43	21.81	59.74	0.27	10.15	38.54	0.21	7.76	44.80	0.15	9.13	58.81	0.13	25.62	205.02	0.11	26.45	138.08	0.16	17.98	152.13	0.11	37.66	183.84	0.17	16.38	105.61	0.13	42.82	218.52	0.16	0.22833333333333336	0.14	0.08833333333333335	0.21859275261323086	0.37770060558471136	N
AT1G22360|AT1G22360|1|-	5345.6	7895804	1:7894807-7896005	279.45	0.00	1.00	284.85	0.00	1.00	356.01	0.00	1.00	303.95	0.00	1.00	288.85	0.00	1.00	312.18	0.00	1.00	386.99	0.00	1.00	311.58	0.00	1.00	360.17	0.00	1.00	463.50	0.00	1.00	270.07	0.00	1.00	523.68	0.00	1.00	1.0	1.0	0.0	1.0	1.0	N
AT1G22410|AT1G22410|1|+	7323.4	7914735	1:7914485-7915004	155.18	405.64	0.28	162.20	365.52	0.31	92.51	414.09	0.18	86.12	449.68	0.16	140.81	435.26	0.24	158.49	498.59	0.24	114.76	492.14	0.19	177.16	486.20	0.27	143.90	476.41	0.23	144.54	416.06	0.26	114.82	433.78	0.21	131.05	476.46	0.22	0.235	0.23	0.004999999999999977	0.780969153509594	0.9259623527532318	N
AT1G22430|AT1G22430|1|+	4226.7	7921706	1:7921478-7921893	101.63	214.36	0.32	127.71	236.51	0.35	131.92	224.90	0.37	117.13	241.60	0.33	97.77	191.61	0.34	120.72	234.55	0.34	145.64	324.85	0.31	209.15	346.22	0.38	135.02	361.66	0.27	145.11	430.38	0.25	192.16	405.25	0.32	222.81	425.25	0.34	0.34166666666666673	0.3116666666666667	0.030000000000000027	0.37751840133559805	0.5674482459645799	N
AT1G22450|AT1G22450|1|+	33367.7	7927063	1:7926862-7927287	26.20	228.89	0.10	17.20	263.81	0.06	27.03	259.67	0.09	18.80	261.61	0.07	41.23	198.92	0.17	27.87	219.70	0.11	24.80	442.69	0.05	22.14	523.09	0.04	37.95	439.18	0.08	30.15	440.87	0.06	13.93	494.37	0.03	19.81	491.67	0.04	0.09999999999999999	0.049999999999999996	0.049999999999999996	0.013136689521111453	0.03843912949684467	N
AT1G22520|AT1G22520|1|-	1125.1	7953112	1:7952974-7953313	14.28	56.85	0.20	14.60	50.84	0.22	16.94	53.70	0.24	11.21	35.72	0.24	9.34	64.44	0.13	20.42	68.08	0.23	46.89	136.78	0.26	67.92	173.16	0.28	49.81	91.93	0.35	37.16	118.33	0.24	52.69	212.63	0.20	50.10	121.31	0.29	0.21	0.26999999999999996	-0.05999999999999997	0.4158931533847932	0.6067729063551153	N
AT1G22530|AT1G22530|1|-	7325.0	7955673	1:7955445-7956018	24.65	106.06	0.19	14.42	97.59	0.13	16.39	146.27	0.10	53.74	268.80	0.17	21.41	86.57	0.20	28.82	119.32	0.19	102.22	430.91	0.19	113.16	328.22	0.26	89.75	287.28	0.24	150.37	605.75	0.20	84.62	226.31	0.27	185.99	575.10	0.24	0.16333333333333333	0.2333333333333333	-0.06999999999999998	0.06292219201303992	0.14252514748884834	N
AT1G22550|AT1G22550|1|-	504.4	7967195	1:7966500-7967415	53.85	0.00	1.00	42.25	5.81	0.88	64.01	37.38	0.63	47.08	42.32	0.53	71.61	0.00	1.00	52.12	0.00	1.00	83.38	4.83	0.95	105.16	0.00	1.00	110.17	0.00	1.00	114.98	0.00	1.00	79.66	0.00	1.00	125.33	0.00	1.00	0.84	0.9916666666666667	-0.15166666666666673	1.1701966921110245e-06	9.647216223941476e-06	N
AT1G22570|AT1G22570|1|-	918.7	7976702	1:7976424-7977415	20.09	12.44	0.62	31.02	13.17	0.70	40.22	22.77	0.64	27.47	11.63	0.70	35.73	0.00	1.00	10.01	36.47	0.22	96.93	11.29	0.90	49.25	49.50	0.50	105.80	0.00	1.00	157.47	56.90	0.73	115.85	0.00	1.00	124.48	26.33	0.83	0.6466666666666667	0.8266666666666667	-0.17999999999999994	0.012782342043488923	0.037623854527887864	N
AT1G22590|AT1G22590|1|+	5073.6	7982246	1:7982045-7984334	25.66	23.02	0.53	29.03	20.08	0.59	30.88	24.25	0.56	24.73	25.02	0.50	24.30	25.00	0.49	27.97	39.90	0.41	27.60	27.22	0.50	26.62	40.51	0.40	24.01	29.41	0.45	27.95	31.84	0.47	26.95	41.76	0.39	26.27	26.55	0.50	0.5133333333333333	0.45166666666666666	0.06166666666666665	0.5710442116012697	0.750651769712606	N
AT1G22620|AT1G22620|1|-	528.0	7997835	1:7997588-7998140	40.95	47.05	0.47	72.86	17.74	0.80	66.58	28.36	0.70	63.57	0.00	1.00	51.92	41.04	0.56	58.16	70.13	0.45	76.79	30.23	0.72	87.07	2.65	0.97	83.30	57.12	0.59	99.25	0.00	1.00	124.53	0.00	1.00	129.12	0.00	1.00	0.6633333333333333	0.8799999999999999	-0.21666666666666656	0.00012477329178762732	0.0006648108313638889	N
AT1G22640|AT1G22640|1|+	73616.7	8007156	1:8006423-8007465	170.07	199.54	0.46	167.80	262.27	0.39	275.26	323.52	0.46	102.02	116.60	0.47	178.49	206.92	0.46	120.52	218.88	0.36	219.08	198.67	0.52	325.09	323.24	0.50	279.31	411.25	0.40	253.17	280.10	0.47	246.50	415.30	0.37	279.77	328.65	0.46	0.43333333333333335	0.4533333333333333	-0.019999999999999962	0.6460444241462349	0.8180101226734373	N
AT1G22700|AT1G22700|1|-	12089.5	8028291	1:8028168-8028607	194.50	206.90	0.48	247.11	215.25	0.53	172.29	205.63	0.46	187.94	194.36	0.49	171.98	188.33	0.48	169.29	233.52	0.42	387.13	307.64	0.56	587.52	360.02	0.62	456.46	398.34	0.53	482.53	320.66	0.60	523.96	307.18	0.63	476.95	316.21	0.60	0.4766666666666666	0.59	-0.11333333333333334	0.00022260672494310173	0.0011166294930639081	N
AT1G22710|AT1G22710|1|-	32377.4	8030883	1:8030587-8031084	125.14	604.59	0.17	139.32	627.37	0.18	136.76	580.22	0.19	141.41	584.20	0.19	127.15	662.72	0.16	109.09	546.20	0.17	223.70	1133.56	0.16	367.97	1171.15	0.24	268.52	1480.53	0.15	210.83	1197.54	0.15	245.08	1118.93	0.18	294.21	1237.67	0.19	0.17666666666666667	0.17833333333333334	-0.0016666666666666774	0.9061684707905491	1.0	N
AT1G22730|AT1G22730|1|+	1298.5	8047108	1:8046907-8049039	82.86	0.00	1.00	85.27	0.00	1.00	80.62	0.00	1.00	90.30	0.00	1.00	81.62	0.00	1.00	81.36	0.00	1.00	117.47	0.00	1.00	107.52	0.00	1.00	117.07	0.00	1.00	105.27	0.00	1.00	109.68	0.00	1.00	124.92	0.00	1.00	1.0	1.0	0.0	1.0	1.0	N
AT1G22740|AT1G22740|1|+	1791.5	8050638	1:8050437-8050784	8.92	36.14	0.20	NA	NA	NA	20.57	35.48	0.37	5.90	24.79	0.19	7.12	30.91	0.19	13.43	42.95	0.24	23.29	175.17	0.12	24.26	146.68	0.14	38.54	148.54	0.21	55.03	225.87	0.20	26.51	93.63	0.22	60.32	235.83	0.20	0.238	0.18166666666666664	0.056333333333333346	0.3018851237622121	0.4825209063575843	N
AT1G22750|AT1G22750|1|+	7690.4	8052807	1:8052606-8052930	78.74	112.87	0.41	52.78	193.55	0.21	41.38	109.57	0.27	128.67	105.90	0.55	78.36	99.94	0.44	81.12	125.61	0.39	109.15	206.66	0.35	124.81	297.68	0.30	114.54	260.09	0.31	108.68	210.81	0.34	130.26	273.59	0.32	184.42	180.49	0.51	0.37833333333333335	0.355	0.023333333333333373	0.5215854688592461	0.7059377286916818	N
AT1G22770|AT1G22770|1|+	912.3	8067485	1:8067130-8067790	38.77	75.62	0.34	32.83	75.90	0.30	41.61	79.33	0.34	19.71	111.07	0.15	33.24	65.99	0.33	35.56	87.52	0.29	32.33	78.61	0.29	53.41	67.13	0.44	33.10	68.89	0.32	57.42	76.02	0.43	47.71	57.69	0.45	58.36	21.24	0.73	0.2916666666666667	0.44333333333333336	-0.15166666666666667	0.02547420967899995	0.0672716431284887	N
AT1G22780|AT1G22780|1|+	111862.2	8069259	1:8069058-8069356	78.74	289.01	0.21	42.70	324.80	0.12	68.60	270.94	0.20	67.33	261.72	0.20	90.12	234.83	0.28	47.36	291.09	0.14	91.12	450.00	0.17	169.14	702.33	0.19	117.04	539.93	0.18	159.53	577.14	0.22	301.46	729.22	0.29	213.23	694.68	0.23	0.19166666666666665	0.21333333333333335	-0.021666666666666695	0.2361098716108367	0.40195713452062437	N
AT1G22790|AT1G22790|1|+	654.5	8071424	1:8071223-8071593	4.36	46.58	0.09	2.69	59.50	0.04	2.18	51.92	0.04	6.05	29.37	0.17	4.34	57.03	0.07	13.42	42.43	0.24	9.07	81.21	0.10	9.59	62.42	0.13	13.39	52.26	0.20	4.22	51.34	0.08	10.27	88.92	0.10	6.30	96.62	0.06	0.10833333333333334	0.11166666666666665	-0.003333333333333313	1.0	1.0	N
AT1G22800|AT1G22800|1|+	226.4	8074127	1:8073926-8074231	40.23	17.24	0.70	40.32	15.20	0.73	33.72	42.60	0.44	11.35	21.45	0.35	45.07	18.66	0.71	44.03	27.82	0.61	52.99	36.05	0.60	86.76	8.75	0.91	62.60	46.99	0.57	74.02	0.00	1.00	69.93	21.72	0.76	84.98	1.33	0.98	0.59	0.8033333333333333	-0.21333333333333337	0.02429872033764985	0.06461235857512083	N
AT1G22840|AT1G22840|1|+	45243.2	8080389	1:8080188-8080482	289.65	321.96	0.47	250.39	318.97	0.44	245.52	304.20	0.45	271.24	268.19	0.50	287.41	261.18	0.52	261.11	363.98	0.42	435.54	337.69	0.56	502.33	410.30	0.55	372.11	474.71	0.44	508.15	354.30	0.59	574.02	504.88	0.53	527.61	492.11	0.52	0.4666666666666666	0.5316666666666666	-0.065	0.014264385798781802	0.041145196424526784	N
AT1G22860|AT1G22860|1|+	184.3	8088976	1:8088775-8089273	46.68	38.84	0.55	23.96	68.58	0.26	37.90	26.49	0.59	30.73	30.94	0.50	49.89	7.58	0.87	59.76	6.78	0.90	32.09	25.57	0.56	39.35	35.41	0.53	79.70	8.57	0.90	54.37	4.90	0.92	80.27	0.00	1.00	68.56	0.00	1.00	0.6116666666666667	0.8183333333333334	-0.20666666666666667	0.0015969606336182717	0.006360319766037982	N
AT1G22885|AT1G22885|1|+	3384.2	8102280	1:8102030-8102500	26.55	148.82	0.15	36.75	176.10	0.17	47.40	186.90	0.20	38.02	138.65	0.22	34.72	148.82	0.19	50.97	190.54	0.21	52.86	272.14	0.16	60.57	259.13	0.19	94.15	258.13	0.27	78.47	282.21	0.22	64.23	294.56	0.18	106.13	399.15	0.21	0.18999999999999997	0.205	-0.015000000000000013	0.7443604963308577	0.8970058515692132	N
AT1G22890|AT1G22890|1|+	3860.7	8103423	1:8103113-8103588	36.71	162.55	0.18	47.28	180.22	0.21	35.21	263.01	0.12	21.47	170.78	0.11	40.66	166.66	0.20	27.62	196.72	0.12	44.12	322.69	0.12	53.67	336.58	0.14	40.77	240.42	0.14	81.31	290.84	0.22	40.94	308.23	0.12	72.48	448.50	0.14	0.15666666666666668	0.14666666666666667	0.010000000000000009	0.812895559235395	0.9523394449566281	N
AT1G22910|AT1G22910|1|+	1169.0	8107962	1:8107593-8108361	17.34	62.01	0.22	15.81	66.65	0.19	21.42	94.72	0.18	1.38	56.64	0.02	13.34	63.85	0.17	15.27	78.87	0.16	82.07	86.61	0.49	61.72	121.03	0.34	57.21	52.51	0.52	65.70	64.58	0.50	100.42	42.86	0.70	63.19	76.68	0.45	0.1566666666666667	0.5	-0.34333333333333327	9.962241205308948e-07	8.332894853295876e-06	N
AT1G22920|AT1G22920|1|-	6211.5	8109798	1:8109574-8110147	15.22	52.44	0.22	27.38	66.08	0.29	19.65	72.97	0.21	9.22	53.36	0.15	12.60	77.58	0.14	31.90	73.88	0.30	29.32	138.40	0.17	50.44	151.76	0.25	18.04	122.67	0.13	31.32	124.05	0.20	33.79	94.77	0.26	42.23	132.68	0.24	0.21833333333333335	0.20833333333333334	0.010000000000000009	0.870930524281996	0.9872694867425178	N
AT1G22930|AT1G22930|1|+	26801.3	8121888	1:8121428-8122151	334.24	276.74	0.55	305.46	301.26	0.50	301.63	338.96	0.47	299.13	271.91	0.52	323.59	302.20	0.52	385.08	212.05	0.64	428.23	274.36	0.61	591.38	198.58	0.75	485.48	368.02	0.57	658.52	189.26	0.78	581.14	291.17	0.67	587.00	315.45	0.65	0.5333333333333333	0.6716666666666667	-0.13833333333333342	1.7633974233220094e-07	1.6736275258405736e-06	N
AT1G22940|AT1G22940|1|+	1072.1	8124842	1:8124380-8125023	79.66	0.00	1.00	90.12	0.00	1.00	73.41	30.48	0.71	60.23	18.47	0.77	67.43	21.34	0.76	47.18	42.40	0.53	84.53	23.78	0.78	139.96	1.74	0.99	101.95	0.00	1.00	117.03	13.49	0.90	78.99	22.11	0.78	168.94	0.00	1.00	0.795	0.9083333333333333	-0.11333333333333329	0.012208749404049923	0.03618202887803283	N
AT1G22950|AT1G22950|1|-	257.2	8125155	1:8125068-8125356	28.78	43.16	0.40	27.71	23.39	0.54	20.94	32.65	0.39	37.19	18.45	0.67	27.83	18.37	0.60	23.99	57.95	0.29	19.68	40.12	0.33	31.50	40.97	0.43	18.45	30.34	0.38	22.08	17.44	0.56	57.42	0.66	0.99	25.95	39.99	0.39	0.4816666666666667	0.5133333333333334	-0.03166666666666673	0.7103314832625601	0.8705678279699137	N
AT1G22970|AT1G22970|1|-	455.7	8130878	1:8130598-8131534	40.51	45.35	0.47	52.04	34.84	0.60	45.60	23.39	0.66	23.63	49.89	0.32	48.56	31.39	0.61	54.41	32.59	0.63	65.91	14.35	0.82	78.18	22.48	0.78	40.79	33.80	0.55	63.98	46.64	0.58	82.13	8.49	0.91	59.68	31.04	0.66	0.5483333333333332	0.7166666666666668	-0.16833333333333356	0.037830674735349096	0.09362974217812302	N
AT1G22990|AT1G22990|1|+	432.6	8140018	1:8139750-8140233	56.95	11.61	0.83	38.04	24.43	0.61	35.49	63.90	0.36	20.59	75.14	0.22	27.46	79.04	0.26	38.16	51.37	0.43	72.46	42.82	0.63	117.13	42.00	0.74	124.07	80.15	0.61	74.30	119.01	0.38	76.59	30.34	0.72	116.65	28.06	0.81	0.4516666666666667	0.6483333333333333	-0.1966666666666666	0.0027635230530675785	0.010231418993417484	N
AT1G23020|AT1G23020|1|-	1116.0	8150125	1:8149891-8150326	3.62	98.05	0.04	5.74	84.67	0.06	1.44	101.19	0.01	2.66	114.01	0.02	3.44	96.59	0.03	0.29	107.82	0.00	3.70	101.42	0.04	10.21	117.16	0.08	1.49	90.04	0.02	3.94	119.64	0.03	4.18	107.63	0.04	2.64	89.62	0.03	0.02666666666666667	0.04	-0.013333333333333332	0.6837397594285862	0.8496978945472909	N
AT1G23030|AT1G23030|1|+	3207.0	8158796	1:8157796-8159185	63.48	38.40	0.62	34.95	76.83	0.31	73.99	71.98	0.51	91.60	108.79	0.46	57.76	38.74	0.60	57.50	54.07	0.52	215.97	76.16	0.74	138.81	77.15	0.64	119.44	81.56	0.59	201.86	64.66	0.76	164.12	0.00	1.00	210.26	79.34	0.73	0.5033333333333333	0.7433333333333332	-0.23999999999999988	6.468051983791817e-06	4.6007897324938646e-05	N
AT1G23080|AT1G23080|1|-	91410.3	8180649	1:8180189-8181767	126.31	181.52	0.41	113.55	194.42	0.37	119.91	220.18	0.35	115.08	135.99	0.46	70.52	206.50	0.25	130.42	184.64	0.41	177.69	103.48	0.63	270.54	0.00	1.00	232.32	45.04	0.84	196.65	56.83	0.78	243.71	3.04	0.99	276.69	13.77	0.95	0.375	0.8650000000000001	-0.4900000000000001	3.1176046468783684e-34	2.261287399710244e-32	N
AT1G23090|AT1G23090|1|-	228.0	8185189	1:8184925-8185390	16.57	34.73	0.32	10.36	34.84	0.23	14.73	31.44	0.32	7.26	34.63	0.17	9.03	55.33	0.14	7.67	50.63	0.13	6.40	59.73	0.10	7.95	26.21	0.23	2.64	31.39	0.08	11.14	35.33	0.24	8.59	91.96	0.09	6.34	74.52	0.08	0.21833333333333335	0.13666666666666666	0.08166666666666669	0.29215626330886696	0.4706804131809681	N
AT1G23120|AT1G23120|1|+	355.6	8199333	1:8199088-8199616	18.88	50.33	0.27	15.45	40.56	0.28	7.69	64.24	0.11	20.34	78.74	0.21	14.18	76.00	0.16	16.77	60.27	0.22	9.25	39.11	0.19	7.77	59.96	0.11	9.13	42.66	0.18	8.95	72.05	0.11	16.63	53.85	0.24	10.59	60.83	0.15	0.20833333333333334	0.16333333333333333	0.04500000000000001	0.6587104447857702	0.8287394890655639	N
AT1G23130|AT1G23130|1|+	1335398.3	8200921	1:8200720-8201246	3776.13	5481.94	0.41	4604.92	6378.61	0.42	3491.70	5028.89	0.41	3475.02	5793.68	0.37	3950.18	5371.99	0.42	4096.95	5560.98	0.42	2841.17	3380.14	0.46	3502.08	3067.28	0.53	2940.11	3582.31	0.45	3447.08	3822.86	0.47	3338.16	3376.90	0.50	3610.98	4117.24	0.47	0.40833333333333327	0.48	-0.07166666666666671	1.476612416335383e-18	4.763992721144383e-17	N
AT1G23180|AT1G23180|1|+	1349.9	8218820	1:8218619-8219641	89.30	0.00	1.00	85.98	0.00	1.00	75.84	0.00	1.00	95.12	0.00	1.00	77.82	4.05	0.95	82.45	0.00	1.00	79.50	0.00	1.00	81.55	0.00	1.00	103.99	0.00	1.00	74.72	0.00	1.00	81.71	0.00	1.00	83.63	0.00	1.00	0.9916666666666667	1.0	-0.008333333333333304	1.0	1.0	N
AT1G23190|AT1G23190|1|+	9086.2	8224338	1:8224115-8224547	99.24	309.76	0.24	77.74	312.63	0.20	84.47	255.31	0.25	67.42	375.88	0.15	82.54	291.12	0.22	66.21	351.98	0.16	77.55	248.93	0.24	118.49	320.39	0.27	117.22	258.27	0.31	113.88	207.23	0.35	93.08	238.01	0.28	139.58	238.19	0.37	0.20333333333333334	0.3033333333333333	-0.09999999999999995	0.0013367308702876162	0.00545955390795234	N
AT1G23220|AT1G23220|1|+	759.1	8244231	1:8243978-8244403	35.10	105.80	0.25	32.97	107.28	0.24	23.60	93.61	0.20	25.74	72.30	0.26	30.51	68.03	0.31	28.55	117.75	0.20	37.24	145.66	0.20	71.81	172.69	0.29	46.55	171.08	0.21	56.36	214.86	0.21	80.81	179.15	0.31	72.11	161.08	0.31	0.24333333333333332	0.255	-0.011666666666666686	0.701083717439152	0.8640290916009108	N
AT1G23230|AT1G23230|1|+	366.0	8251784	1:8251534-8251937	47.28	39.32	0.55	32.13	26.69	0.55	28.63	47.40	0.38	42.05	40.53	0.51	25.22	32.68	0.44	34.22	34.43	0.50	38.12	46.28	0.45	45.07	51.25	0.47	15.27	78.29	0.16	24.91	73.49	0.25	56.05	41.31	0.58	62.66	25.15	0.71	0.48833333333333334	0.4366666666666666	0.05166666666666675	0.5290177478298654	0.7125998861577028	N
AT1G23260|AT1G23260|1|-	5546.3	8257063	1:8256854-8257264	7.57	169.87	0.04	9.66	165.81	0.06	5.47	152.83	0.03	8.63	150.07	0.05	6.94	148.20	0.04	5.09	144.03	0.03	7.95	232.24	0.03	5.58	318.35	0.02	6.05	238.85	0.02	9.52	340.11	0.03	11.74	346.47	0.03	14.91	363.46	0.04	0.041666666666666664	0.028333333333333335	0.013333333333333329	0.4268089669888486	0.6177105600011927	N
AT1G23280|AT1G23280|1|-	1616.6	8260717	1:8260608-8260918	2.06	66.58	0.03	0.03	53.72	0.00	3.80	37.84	0.09	1.66	46.84	0.03	0.10	35.49	0.00	3.65	71.58	0.05	6.01	99.44	0.06	3.93	122.60	0.03	0.11	83.75	0.00	3.10	94.57	0.03	6.07	142.95	0.04	2.48	110.42	0.02	0.03333333333333333	0.03	0.003333333333333334	1.0	1.0	N
AT1G23310|AT1G23310|1|-	5576579.3	8268638	1:8268385-8268849	1582.69	10173.80	0.13	1638.89	10330.00	0.14	1389.23	9493.14	0.13	1392.07	10461.63	0.12	1554.61	9794.40	0.14	1306.34	9729.69	0.12	1788.65	14035.27	0.11	3278.34	20171.21	0.14	2457.55	18434.08	0.12	2386.53	17001.82	0.12	3153.74	20291.32	0.13	2908.55	19463.63	0.13	0.13	0.125	0.0050000000000000044	0.7409907462020643	0.8946810504264778	N
AT1G23330|AT1G23330|1|-	359.7	8279793	1:8279554-8280057	17.43	62.88	0.22	25.77	50.49	0.34	16.14	42.66	0.27	24.82	61.87	0.29	11.11	86.92	0.11	15.20	52.81	0.22	24.95	61.67	0.29	35.57	83.40	0.30	20.69	70.54	0.23	22.53	76.53	0.23	33.70	87.73	0.28	56.32	76.06	0.43	0.2416666666666667	0.29333333333333333	-0.05166666666666664	0.4014246794181948	0.5927127844544728	N
AT1G23360|AT1G23360|1|-	550.8	8295247	1:8295078-8295521	11.20	63.11	0.15	14.96	83.15	0.15	7.65	64.16	0.11	3.45	57.78	0.06	4.55	69.69	0.06	5.48	97.54	0.05	27.12	77.53	0.26	23.88	80.79	0.23	17.97	108.44	0.14	19.77	92.39	0.18	27.33	95.58	0.22	21.43	101.33	0.17	0.09666666666666668	0.19999999999999998	-0.1033333333333333	0.06408975584424771	0.14454378207541752	N
AT1G23380|AT1G23380|1|-	141.4	8297397	1:8297241-8297657	12.21	39.35	0.24	29.83	22.68	0.57	18.41	41.20	0.31	5.25	28.96	0.15	8.37	30.64	0.21	26.12	13.81	0.65	20.65	31.20	0.40	26.74	40.30	0.40	30.90	34.12	0.48	40.36	31.25	0.56	54.34	28.02	0.66	17.20	31.12	0.36	0.355	0.4766666666666666	-0.12166666666666665	0.1737477236337544	0.3158673856107972	N
AT1G23400|AT1G23400|1|-	4662.5	8312196	1:8311984-8312593	92.28	214.95	0.30	94.36	233.24	0.29	93.71	250.99	0.27	51.30	224.07	0.19	94.17	234.79	0.29	88.45	233.17	0.28	207.65	346.83	0.37	347.33	308.85	0.53	242.91	499.65	0.33	230.13	365.77	0.39	338.45	369.86	0.48	328.02	282.43	0.54	0.27	0.44	-0.16999999999999998	3.381354614300196e-07	3.051818419827525e-06	N
AT1G23440|AT1G23440|1|+	5570.4	8324069	1:8323780-8324497	35.21	304.76	0.10	42.73	273.27	0.14	39.73	246.24	0.14	35.71	223.84	0.14	40.36	275.03	0.13	20.19	286.54	0.07	48.53	305.49	0.14	83.37	242.25	0.26	92.55	254.12	0.27	85.35	223.42	0.28	95.35	323.44	0.23	85.56	368.55	0.19	0.12	0.22833333333333336	-0.10833333333333336	0.00032091235104109405	0.0015495170224953119	N
AT1G23480|AT1G23480|1|+	1392.8	8336271	1:8336068-8336414	8.89	33.24	0.21	12.30	36.25	0.25	10.41	63.64	0.14	31.41	51.97	0.38	16.82	50.91	0.25	6.58	54.99	0.11	70.10	208.02	0.25	76.81	239.14	0.24	81.24	146.56	0.36	99.13	205.09	0.33	91.27	137.52	0.40	79.60	213.40	0.27	0.22333333333333336	0.30833333333333335	-0.08499999999999999	0.27774999550928486	0.4539798398231322	N
AT1G23490|AT1G23490|1|+	34718.7	8338569	1:8338368-8338827	26.24	322.08	0.08	25.89	347.37	0.07	29.48	387.15	0.07	33.23	276.41	0.11	14.96	318.67	0.04	25.00	400.82	0.06	39.72	514.20	0.07	65.49	756.65	0.08	37.42	549.70	0.06	58.43	583.22	0.09	55.77	673.58	0.08	73.42	737.91	0.09	0.07166666666666667	0.07833333333333335	-0.006666666666666682	0.5428879725066328	0.7247988422408183	N
AT1G23750|AT1G23750|1|+	456.9	8401230	1:8400984-8401550	36.54	37.21	0.50	25.40	73.09	0.26	32.66	34.22	0.49	30.41	71.02	0.30	38.10	37.79	0.50	30.44	64.82	0.32	62.14	24.67	0.72	98.60	20.90	0.83	122.05	4.57	0.96	50.84	56.71	0.47	61.76	52.34	0.54	95.29	44.26	0.68	0.39499999999999996	0.6999999999999998	-0.3049999999999999	3.178843820272789e-06	2.407634987961182e-05	N
AT1G23780|AT1G23780|1|-	3239.4	8408142	1:8406663-8408530	154.32	7.84	0.95	173.22	9.88	0.95	159.66	16.51	0.91	167.04	0.00	1.00	163.64	15.72	0.91	158.11	28.96	0.85	138.70	0.00	1.00	139.76	0.00	1.00	162.84	0.00	1.00	139.89	0.00	1.00	151.65	0.00	1.00	125.64	0.00	1.00	0.9283333333333332	1.0	-0.07166666666666677	0.0003672504513274429	0.0017452739047540888	N
AT1G23800|AT1G23800|1|-	191.2	8412310	1:8412079-8412511	51.30	7.22	0.88	35.64	14.86	0.71	25.90	30.02	0.46	45.08	25.51	0.64	62.66	3.23	0.95	49.59	35.70	0.58	51.00	27.15	0.65	53.24	4.65	0.92	36.45	40.00	0.48	36.75	33.54	0.52	35.86	57.79	0.38	65.83	13.12	0.83	0.7033333333333333	0.63	0.07333333333333325	0.2879974515295468	0.4660161032089926	N
AT1G23820|AT1G23820|1|+	4105.3	8422860	1:8422659-8422960	133.47	143.05	0.48	100.97	189.88	0.35	96.20	124.73	0.44	91.78	144.43	0.39	52.77	170.15	0.24	52.80	214.35	0.20	109.83	140.41	0.44	245.90	129.53	0.65	154.09	201.15	0.43	124.06	185.37	0.40	185.94	229.45	0.45	182.40	153.46	0.54	0.35000000000000003	0.48500000000000004	-0.135	0.0005565931531603079	0.0025071922769510334	N
AT1G23860|AT1G23860|1|-	1308.8	8427864	1:8427257-8428097	16.13	154.86	0.09	24.85	130.15	0.16	27.00	125.55	0.18	24.70	159.20	0.13	17.97	112.85	0.14	22.23	94.70	0.19	43.57	189.99	0.19	50.93	197.27	0.21	54.86	249.17	0.18	43.36	312.32	0.12	67.49	252.89	0.21	55.05	232.58	0.19	0.14833333333333334	0.18333333333333335	-0.035	0.4218487330277527	0.6121365157851605	N
AT1G23870|AT1G23870|1|+	4828.0	8435366	1:8435165-8435656	169.99	103.51	0.62	143.78	190.07	0.43	288.07	183.25	0.61	130.10	51.42	0.72	155.56	99.48	0.61	152.32	86.72	0.64	342.22	209.07	0.62	335.02	172.14	0.66	316.74	292.82	0.52	338.76	195.32	0.63	316.93	122.03	0.72	340.67	260.44	0.57	0.605	0.62	-0.015000000000000013	0.5525256886569064	0.7342133950499704	N
AT1G23890|AT1G23890|1|-	159.8	8439125	1:8438811-8439416	42.88	14.36	0.75	28.34	17.50	0.62	34.10	10.78	0.76	26.41	9.50	0.74	33.10	0.00	1.00	31.30	47.13	0.40	52.53	15.06	0.78	45.85	10.09	0.82	68.22	0.00	1.00	18.03	38.20	0.32	50.69	0.00	1.00	36.14	2.77	0.93	0.7116666666666668	0.8083333333333332	-0.09666666666666646	0.12316100287420961	0.24158130390071475	N
AT1G23900|AT1G23900|1|+	1463.0	8447311	1:8447057-8447681	30.72	147.46	0.17	31.39	138.79	0.18	39.21	130.71	0.23	52.13	112.49	0.32	42.74	149.53	0.22	34.03	146.02	0.19	36.07	150.15	0.19	51.53	213.44	0.19	91.74	128.57	0.42	50.07	145.35	0.26	76.26	138.35	0.36	55.20	105.33	0.34	0.2183333333333333	0.29333333333333333	-0.07500000000000004	0.10164507337717177	0.2070617249177851	N
AT1G23950|AT1G23950|1|-	6323.6	8470020	1:8469573-8470221	171.45	0.00	1.00	167.92	0.00	1.00	154.90	0.00	1.00	141.09	0.00	1.00	164.83	0.00	1.00	181.03	0.00	1.00	195.90	0.00	1.00	218.50	0.00	1.00	177.33	0.00	1.00	174.33	0.00	1.00	194.92	0.00	1.00	172.37	0.00	1.00	1.0	1.0	0.0	1.0	1.0	N
AT1G23960|AT1G23960|1|-	2780.4	8478639	1:8478391-8478896	140.30	96.15	0.59	187.28	56.76	0.77	160.86	100.19	0.62	177.18	63.33	0.74	134.19	86.12	0.61	141.47	121.86	0.54	213.31	116.62	0.65	374.07	131.73	0.74	405.34	55.74	0.88	362.18	73.27	0.83	364.20	178.59	0.67	399.45	41.38	0.91	0.6449999999999999	0.7799999999999999	-0.135	0.00010711792751380763	0.0005810212039872852	N
AT1G24020|AT1G24020|1|-	7789.6	8500655	1:8500119-8500933	55.57	550.38	0.09	38.58	554.25	0.07	40.09	500.49	0.07	39.50	539.43	0.07	43.10	567.99	0.07	43.23	569.05	0.07	29.02	366.11	0.07	45.84	459.59	0.09	44.66	420.69	0.10	36.03	395.52	0.08	50.61	502.53	0.09	35.79	414.84	0.08	0.07333333333333335	0.085	-0.011666666666666659	0.49001325563471776	0.6775783268543127	N
AT1G24040|AT1G24040|1|-	367.1	8503886	1:8503777-8504087	34.37	59.76	0.37	52.16	32.95	0.61	28.83	53.13	0.35	32.82	59.41	0.36	29.16	55.56	0.34	52.19	64.62	0.45	65.11	70.92	0.48	114.67	46.23	0.71	73.66	59.42	0.55	128.17	51.04	0.72	108.90	47.82	0.69	117.55	0.00	1.00	0.41333333333333333	0.6916666666666668	-0.27833333333333343	2.6828286663732656e-05	0.00016538007728133462	N
AT1G24050|AT1G24050|1|+	2246.9	8508693	1:8508398-8508909	82.35	185.08	0.31	55.19	187.07	0.23	82.44	151.11	0.35	43.66	143.93	0.23	98.31	190.47	0.34	90.55	254.64	0.26	97.97	205.08	0.32	157.02	161.68	0.49	118.81	156.71	0.43	137.18	142.84	0.49	169.18	156.61	0.52	211.94	135.10	0.61	0.2866666666666667	0.4766666666666666	-0.18999999999999995	2.9576051991176954e-06	2.253145245840437e-05	N
AT1G24100|AT1G24100|1|-	35214.0	8526071	1:8525334-8526272	438.72	0.00	1.00	445.47	0.00	1.00	510.17	0.00	1.00	353.89	0.00	1.00	353.29	0.00	1.00	395.74	23.97	0.94	331.37	0.00	1.00	361.02	0.00	1.00	530.51	0.00	1.00	726.55	0.00	1.00	788.18	0.00	1.00	645.14	0.00	1.00	0.9899999999999999	1.0	-0.01000000000000012	0.07736059277314558	0.16806563410291817	N
AT1G24120|AT1G24120|1|-	677.6	8529348	1:8529064-8529579	40.71	46.56	0.47	33.93	45.46	0.43	52.28	51.81	0.50	32.71	36.26	0.47	17.02	48.56	0.26	20.09	59.95	0.25	62.97	96.92	0.39	70.28	121.30	0.37	101.36	37.29	0.73	68.26	96.18	0.42	96.36	127.72	0.43	102.51	77.49	0.57	0.39666666666666667	0.48499999999999993	-0.08833333333333326	0.28122040355537214	0.45773745292870316	N
AT1G24145|AT1G24145|1|+	1383.2	8541684	1:8541339-8542053	23.48	232.95	0.09	31.81	234.37	0.12	28.32	276.46	0.09	18.05	208.33	0.08	18.77	196.52	0.09	27.25	201.01	0.12	12.62	101.49	0.11	25.35	91.65	0.22	13.75	125.40	0.10	25.43	147.42	0.15	10.49	133.97	0.07	17.19	161.06	0.10	0.09833333333333333	0.12500000000000003	-0.0266666666666667	0.4973754467958468	0.6841654746395571	N
AT1G24147|AT1G24147|1|+	4934.6	8543279	1:8543026-8543545	58.35	271.99	0.18	45.96	290.35	0.14	62.67	407.92	0.13	77.80	336.60	0.19	38.54	279.92	0.12	49.70	257.52	0.16	32.31	214.46	0.13	43.15	140.16	0.24	38.06	122.63	0.24	17.54	215.28	0.08	55.54	216.14	0.20	29.29	154.25	0.16	0.15333333333333335	0.17499999999999996	-0.021666666666666612	0.7215668480795439	0.8805544400000093	N
AT1G24160|AT1G24160|1|-	8804.7	8553584	1:8553385-8553785	145.83	140.22	0.51	149.02	216.97	0.41	142.23	274.96	0.34	147.91	181.66	0.45	111.22	185.99	0.37	124.79	254.84	0.33	318.51	417.88	0.43	589.16	368.69	0.62	476.13	488.01	0.49	525.35	528.32	0.50	531.13	491.21	0.52	527.93	472.42	0.53	0.40166666666666667	0.515	-0.11333333333333334	9.556238288520132e-05	0.0005243530639040561	N
AT1G24180|AT1G24180|1|-	1558.7	8560620	1:8560420-8560821	13.14	95.95	0.12	7.09	102.36	0.06	9.29	106.07	0.08	20.77	111.61	0.16	12.63	110.84	0.10	7.65	123.76	0.06	12.95	147.82	0.08	24.03	149.82	0.14	8.00	105.37	0.07	9.82	99.00	0.09	19.29	151.50	0.11	17.69	107.89	0.14	0.09666666666666668	0.105	-0.008333333333333318	0.8363093040833727	0.968240190455141	N
AT1G24190|AT1G24190|1|-	2186.9	8563649	1:8563510-8563986	56.28	105.13	0.35	89.49	99.02	0.47	69.57	102.00	0.41	44.76	118.40	0.27	47.76	91.56	0.34	58.42	120.13	0.33	69.37	150.34	0.32	73.86	137.56	0.35	50.49	184.34	0.22	50.26	133.10	0.27	71.62	142.59	0.33	101.14	99.12	0.51	0.36166666666666664	0.3333333333333333	0.02833333333333332	0.5129820656845618	0.6980967935781281	N
AT1G24240|AT1G24240|1|+	171.4	8588066	1:8587865-8588180	17.18	42.26	0.29	25.59	26.25	0.49	22.32	26.51	0.46	15.92	45.72	0.26	32.51	17.44	0.65	20.85	36.28	0.36	17.93	58.06	0.24	18.76	62.92	0.23	33.63	33.95	0.50	23.23	35.01	0.40	23.99	43.12	0.36	22.01	52.38	0.30	0.4183333333333333	0.3383333333333333	0.07999999999999996	0.4516580110342475	0.6413440491065044	N
AT1G24267|AT1G24267|1|-	784.8	8604336	1:8604022-8604594	84.43	90.10	0.48	74.29	168.72	0.31	56.52	116.79	0.33	91.57	125.31	0.42	72.21	129.19	0.36	105.18	99.82	0.51	53.15	111.91	0.32	87.15	111.68	0.44	68.10	166.03	0.29	65.18	125.49	0.34	84.39	89.83	0.48	78.18	151.96	0.34	0.40166666666666667	0.36833333333333335	0.033333333333333326	0.5363205740908027	0.7188316084084578	N
AT1G24300|AT1G24300|1|-	441.0	8614478	1:8614363-8614771	91.33	23.47	0.80	93.19	33.05	0.74	112.36	51.46	0.69	133.33	44.12	0.75	102.62	17.49	0.85	74.45	51.26	0.59	84.95	26.56	0.76	141.44	23.89	0.86	118.64	6.99	0.94	104.38	4.43	0.96	158.88	2.80	0.98	115.48	0.00	1.00	0.7366666666666667	0.9166666666666666	-0.17999999999999994	7.288023630147247e-05	0.00040800614542407435	N
AT1G24440|AT1G24440|1|+	2723.2	8663765	1:8663326-8664007	68.87	76.52	0.47	70.55	113.01	0.38	64.92	143.14	0.31	24.82	96.88	0.20	65.09	84.58	0.43	49.17	122.82	0.29	76.74	154.99	0.33	119.36	134.19	0.47	108.08	179.15	0.38	95.34	163.99	0.37	105.66	178.84	0.37	104.17	142.25	0.42	0.3466666666666666	0.39000000000000007	-0.043333333333333446	0.4110855228859903	0.6022547218624147	N
AT1G24450|AT1G24450|1|+	733.5	8665125	1:8664669-8665569	6.89	92.56	0.07	4.37	114.40	0.04	7.24	95.69	0.07	1.17	76.19	0.02	13.55	111.57	0.11	9.40	131.44	0.07	16.50	98.20	0.14	20.43	149.78	0.12	17.87	129.77	0.12	19.47	104.69	0.16	21.86	104.76	0.17	12.76	127.20	0.09	0.06333333333333334	0.13333333333333333	-0.06999999999999999	0.09183546754014416	0.19171618507277574	N
AT1G24460|AT1G24460|1|+	947.6	8672437	1:8672236-8672651	55.51	98.28	0.36	65.57	60.29	0.52	45.99	127.94	0.26	47.68	106.15	0.31	67.30	70.04	0.49	66.81	66.76	0.50	30.93	83.24	0.27	54.34	115.51	0.32	74.53	58.52	0.56	83.95	77.63	0.52	63.03	84.46	0.43	66.51	73.48	0.48	0.40666666666666673	0.43	-0.02333333333333326	0.6335704444170196	0.8077738653030438	N
AT1G24490|AT1G24490|1|+	1295.9	8684937	1:8684663-8685271	124.55	0.81	0.99	116.45	0.00	1.00	115.29	1.43	0.99	109.50	15.21	0.88	128.31	2.15	0.98	108.84	33.21	0.77	111.43	4.62	0.96	166.78	0.00	1.00	142.13	0.00	1.00	127.74	13.87	0.90	177.38	0.00	1.00	171.69	0.00	1.00	0.9349999999999999	0.9766666666666666	-0.04166666666666663	0.07050025347648836	0.1559603288567315	N
AT1G24510|AT1G24510|1|-	12134.5	8685428	1:8685271-8685674	183.56	275.67	0.40	178.56	331.79	0.35	187.05	301.00	0.38	149.97	276.04	0.35	162.75	262.12	0.38	178.83	186.71	0.49	269.34	427.88	0.39	459.19	379.73	0.55	368.12	564.78	0.39	272.61	446.76	0.38	496.74	485.77	0.51	403.64	447.48	0.47	0.3916666666666666	0.44833333333333325	-0.05666666666666664	0.032837470066989824	0.08296616833350569	N
AT1G24560|AT1G24560|1|+	1289.0	8705697	1:8705290-8705879	76.82	70.42	0.52	51.64	108.94	0.32	80.94	60.61	0.57	77.38	60.38	0.56	104.00	47.79	0.69	49.49	68.42	0.42	94.42	85.02	0.53	107.52	87.11	0.55	82.86	111.16	0.43	135.44	60.86	0.69	81.57	130.55	0.38	126.12	89.55	0.58	0.5133333333333333	0.5266666666666667	-0.01333333333333342	0.9123968659813015	1.0	N
AT1G24610|AT1G24610|1|-	627.9	8720898	1:8720721-8721280	55.04	70.33	0.44	51.14	83.58	0.38	44.48	83.47	0.35	73.28	65.68	0.53	36.57	76.26	0.32	34.31	90.97	0.27	89.43	66.03	0.58	124.79	32.34	0.79	113.39	43.46	0.72	92.67	75.37	0.55	91.74	45.17	0.67	60.10	88.81	0.40	0.38166666666666665	0.6183333333333333	-0.23666666666666664	0.00011553372090089434	0.0006222761944155275	N
AT1G24625|AT1G24625|1|-	1496.9	8726034	1:8725789-8726661	112.51	75.19	0.60	110.96	58.58	0.65	116.29	87.95	0.57	51.30	61.42	0.46	111.53	62.23	0.64	53.77	99.35	0.35	128.41	83.29	0.61	104.16	87.47	0.54	114.68	151.75	0.43	242.15	85.61	0.74	260.03	13.21	0.95	201.41	61.52	0.77	0.545	0.6733333333333332	-0.1283333333333332	0.0070857997656945245	0.022912981539767813	N
AT1G24706|AT1G24706|1|+	4475.0	8755026	1:8754716-8755604	83.60	79.25	0.51	59.93	62.00	0.49	82.34	65.01	0.56	78.99	99.71	0.44	77.64	89.29	0.47	62.64	103.75	0.38	73.22	93.72	0.44	158.43	2.95	0.98	108.68	69.84	0.61	117.48	51.43	0.70	139.68	37.22	0.79	147.34	31.61	0.82	0.4749999999999999	0.7233333333333333	-0.24833333333333335	3.2539933915402134e-06	2.461514801285321e-05	N
AT1G24764|AT1G24764|1|-	426.3	8759842	1:8759645-8760043	32.28	100.48	0.24	60.03	34.46	0.64	56.41	77.75	0.42	47.68	52.25	0.48	32.93	59.03	0.36	55.68	87.61	0.39	52.90	67.17	0.44	72.57	92.81	0.44	77.57	101.52	0.43	77.20	82.87	0.48	67.56	72.82	0.48	92.02	59.13	0.61	0.4216666666666667	0.48	-0.05833333333333329	0.2650053517573162	0.43830861857730546	N
AT1G25098|AT1G25098|1|+	1058192.8	8814935	1:8814734-8815264	0.30	1259.29	0.00	1.90	1382.59	0.00	1.17	1371.89	0.00	2.24	1208.98	0.00	1.62	1215.26	0.00	0.77	1534.17	0.00	0.50	1365.97	0.00	0.85	1593.87	0.00	0.55	1317.56	0.00	1.34	1301.93	0.00	0.49	1631.00	0.00	1.53	1708.06	0.00	0.0	0.0	0.0	0.47211367673013344	0.6601088512265845	N
AT1G25175|AT1G25175|1|+	2732642.6	8828544	1:8827570-8829682	393.35	853.09	0.32	431.85	929.23	0.32	426.57	910.15	0.32	379.41	778.76	0.33	379.62	874.37	0.30	495.77	931.07	0.35	427.20	837.64	0.34	494.28	619.87	0.44	409.98	617.13	0.40	402.40	512.92	0.44	498.42	592.39	0.46	525.80	626.70	0.46	0.3233333333333333	0.42333333333333334	-0.10000000000000003	7.58327740874307e-07	6.50734262613816e-06	N
AT1G25220|AT1G25220|1|-	992.5	8837333	1:8837007-8837534	10.17	116.67	0.08	11.05	94.21	0.10	11.51	140.27	0.08	0.73	84.06	0.01	15.22	90.79	0.14	19.83	130.66	0.13	16.77	99.68	0.14	28.61	148.43	0.16	17.82	139.88	0.11	31.98	209.13	0.13	36.01	229.75	0.14	13.50	260.16	0.05	0.09000000000000001	0.12166666666666669	-0.031666666666666676	0.5792060207611589	0.7585095187537738	N
AT1G25230|AT1G25230|1|-	5844.3	8840469	1:8840203-8840699	17.18	212.80	0.07	17.46	241.74	0.07	25.93	395.91	0.06	13.07	219.60	0.06	16.64	239.22	0.07	16.55	280.57	0.06	43.57	550.55	0.07	44.35	586.33	0.07	39.91	487.39	0.08	46.70	608.05	0.07	47.96	492.78	0.09	66.52	658.10	0.09	0.065	0.07833333333333332	-0.013333333333333322	0.40568572808773	0.596875789163129	N
AT1G25260|AT1G25260|1|-	4505.0	8854096	1:8853534-8854297	15.98	271.61	0.06	19.74	312.27	0.06	25.20	348.64	0.07	19.74	285.46	0.06	20.48	246.05	0.08	28.60	241.46	0.11	31.32	359.88	0.08	46.79	360.97	0.11	28.15	406.97	0.06	24.02	355.84	0.06	39.53	387.45	0.09	43.68	427.07	0.09	0.07333333333333333	0.08166666666666667	-0.008333333333333331	0.4847102790404465	0.6723291517064373	N
AT1G25275|AT1G25275|1|+	184634.1	8861326	1:8861125-8861522	3.03	557.72	0.01	6.72	568.75	0.01	3.95	775.80	0.01	5.91	438.79	0.01	6.77	542.24	0.01	1.65	602.09	0.00	8.56	836.17	0.01	4.57	1044.00	0.00	1.42	753.55	0.00	8.92	1201.15	0.01	14.50	1206.09	0.01	4.04	1402.69	0.00	0.008333333333333333	0.005	0.003333333333333333	1.0	1.0	N
AT1G25280|AT1G25280|1|+	1820.1	8866059	1:8865858-8866894	139.45	28.76	0.83	147.04	0.00	1.00	150.24	21.34	0.88	134.57	28.02	0.83	157.56	0.00	1.00	158.43	0.00	1.00	195.06	0.00	1.00	194.48	0.00	1.00	186.76	0.00	1.00	187.82	0.00	1.00	176.43	0.00	1.00	197.91	0.00	1.00	0.9233333333333333	1.0	-0.07666666666666666	3.003408938891895e-05	0.00018309739034213965	N
AT1G25290|AT1G25290|1|+	373.2	8868994	1:8868793-8869289	15.23	63.51	0.19	17.36	83.77	0.17	13.94	63.15	0.18	8.16	47.80	0.15	6.92	63.24	0.10	11.99	71.72	0.14	26.80	76.63	0.26	27.94	85.31	0.25	21.31	109.22	0.16	23.01	108.45	0.18	22.12	85.37	0.21	25.47	85.26	0.23	0.155	0.215	-0.06	0.45121385747208853	0.6410797972119164	N
AT1G25350|AT1G25350|1|-	2612.9	8889173	1:8889018-8889374	47.77	151.70	0.24	92.23	142.20	0.39	43.86	146.91	0.23	37.65	145.48	0.21	40.25	144.26	0.22	39.79	169.28	0.19	44.97	191.70	0.19	41.31	234.82	0.15	37.64	208.03	0.15	71.15	257.76	0.22	58.69	214.88	0.21	37.07	216.56	0.15	0.24666666666666667	0.17833333333333332	0.06833333333333336	0.06613305400106974	0.14811001974501464	N
AT1G25380|AT1G25380|1|+	1434.0	8905645	1:8905444-8906029	114.96	0.00	1.00	116.81	52.85	0.69	116.86	0.00	1.00	117.34	2.24	0.98	118.43	0.00	1.00	101.36	45.96	0.69	116.80	8.15	0.93	123.45	0.00	1.00	141.45	0.00	1.00	199.39	0.00	1.00	196.05	0.00	1.00	157.00	0.00	1.00	0.8933333333333332	0.9883333333333333	-0.09500000000000008	1.9929139604262377e-05	0.00012654048578118545	N
AT1G25420|AT1G25420|1|+	1193.9	8917948	1:8917609-8918267	43.68	132.87	0.25	59.65	100.40	0.37	37.88	128.62	0.23	32.41	97.68	0.25	30.04	118.57	0.20	43.77	122.87	0.26	109.36	89.15	0.55	113.30	172.19	0.40	96.92	144.32	0.40	90.48	104.09	0.47	130.16	142.38	0.48	122.51	152.08	0.45	0.26	0.4583333333333333	-0.1983333333333333	0.000138767378332954	0.0007292075296110862	N
AT1G25440|AT1G25440|1|-	14805.1	8933966	1:8933716-8934193	604.63	794.69	0.43	495.28	723.38	0.41	413.29	388.33	0.52	454.56	804.73	0.36	576.37	759.81	0.43	539.82	610.37	0.47	349.26	325.82	0.52	618.41	318.66	0.66	437.86	505.62	0.46	394.44	410.71	0.49	421.69	465.24	0.48	386.27	345.67	0.53	0.4366666666666667	0.5233333333333333	-0.08666666666666661	3.7126434156855496e-05	0.0002217099616686737	N
AT1G25450|AT1G25450|1|-	1080.4	8938685	1:8938387-8939127	35.55	54.36	0.40	27.73	76.77	0.27	35.77	68.70	0.34	36.03	78.44	0.31	39.47	57.82	0.41	26.12	67.90	0.28	90.47	99.87	0.48	78.55	64.74	0.55	60.39	88.57	0.41	62.66	125.33	0.33	47.96	87.85	0.35	121.69	109.05	0.53	0.33499999999999996	0.4416666666666667	-0.10666666666666674	0.07274588756748629	0.16006994790923632	N
AT1G25470|AT1G25470|1|-	510.2	8944983	1:8944609-8945945	64.45	26.06	0.71	67.35	22.87	0.75	70.17	16.64	0.81	52.19	19.27	0.73	79.60	0.00	1.00	77.57	4.41	0.95	77.08	6.06	0.93	62.13	13.99	0.82	64.35	20.80	0.76	44.89	41.59	0.52	67.51	4.21	0.94	78.61	0.00	1.00	0.8250000000000001	0.8283333333333333	-0.0033333333333331883	1.0	1.0	N
AT1G25490|AT1G25490|1|+	12010.9	8954978	1:8954777-8955160	44.83	231.51	0.16	36.40	248.69	0.13	28.22	256.81	0.10	18.07	200.78	0.08	33.59	212.60	0.14	24.43	191.57	0.11	54.76	293.46	0.16	68.11	247.15	0.22	41.54	217.71	0.16	26.73	285.68	0.09	47.42	308.06	0.13	48.27	261.30	0.16	0.12000000000000001	0.15333333333333335	-0.03333333333333334	0.32468145025369344	0.5081681479242325	N
AT1G25500|AT1G25500|1|-	101.6	8955415	1:8955195-8955616	7.38	40.79	0.15	13.47	35.49	0.28	7.53	49.64	0.13	6.32	36.48	0.15	8.86	31.81	0.22	21.04	21.48	0.49	NA	NA	NA	16.42	42.35	0.28	17.28	21.50	0.45	14.85	32.84	0.31	11.01	40.23	0.21	36.26	7.92	0.82	0.23666666666666666	0.414	-0.17733333333333332	0.0745119295843643	0.1631970562662173	N
AT1G25550|AT1G25550|1|+	81816.1	8977957	1:8977523-8978305	94.96	285.64	0.25	138.34	441.46	0.24	171.05	674.74	0.20	98.46	202.76	0.33	106.77	278.85	0.28	90.01	345.19	0.21	189.40	605.77	0.24	264.00	587.91	0.31	167.24	628.82	0.21	212.22	469.99	0.31	155.37	664.40	0.19	174.12	666.05	0.21	0.25166666666666665	0.245	0.006666666666666654	0.8930606694130478	1.0	N
AT1G25570|AT1G25570|1|-	608.7	8992017	1:8991708-8992292	30.10	65.43	0.32	33.47	65.06	0.34	29.86	68.92	0.30	26.05	44.43	0.37	22.79	94.44	0.19	20.42	67.86	0.23	36.47	95.11	0.28	39.12	100.23	0.28	34.56	84.46	0.29	77.39	77.23	0.50	51.43	112.29	0.31	68.40	86.27	0.44	0.2916666666666667	0.35000000000000003	-0.05833333333333335	0.32278940903325304	0.5065632276632084	N
AT1G25580|AT1G25580|1|-	202.0	8996898	1:8996714-8997117	22.24	22.20	0.50	16.13	27.89	0.37	11.25	35.43	0.24	12.64	38.50	0.25	19.06	21.35	0.47	11.24	44.39	0.20	33.33	36.32	0.48	31.07	55.05	0.36	15.61	44.83	0.26	17.63	58.43	0.23	29.88	69.22	0.30	33.65	36.51	0.48	0.3383333333333333	0.35166666666666674	-0.01333333333333342	1.0	1.0	N
AT1G25682|AT1G25682|1|-	1397.6	9002565	1:9002285-9002885	62.18	81.82	0.43	67.46	102.93	0.40	71.55	120.04	0.37	43.82	131.65	0.25	60.91	90.90	0.40	56.10	106.79	0.34	90.48	97.70	0.48	136.97	61.87	0.69	49.55	154.84	0.24	145.73	81.91	0.64	87.21	102.06	0.46	148.73	48.47	0.75	0.365	0.5433333333333333	-0.17833333333333334	0.0007180661303927768	0.003121357453067814	N
AT1G26110|AT1G26110|1|-	9927.8	9024517	1:9024341-9024807	467.84	208.70	0.69	377.73	281.58	0.57	398.42	321.58	0.55	371.23	224.26	0.62	435.84	201.63	0.68	467.16	139.82	0.77	546.13	132.30	0.80	819.94	0.00	1.00	701.14	0.00	1.00	756.35	0.00	1.00	794.41	0.00	1.00	737.00	0.00	1.00	0.6466666666666666	0.9666666666666667	-0.32000000000000006	2.8376404296446543e-61	4.146710727849842e-59	N
AT1G26120|AT1G26120|1|-	474.9	9028604	1:9028376-9028808	47.51	40.78	0.54	50.21	23.58	0.68	54.21	49.04	0.53	50.73	69.70	0.42	49.87	67.94	0.42	41.95	66.51	0.39	85.44	72.45	0.54	105.19	41.95	0.71	96.68	49.98	0.66	112.58	20.79	0.84	154.97	0.00	1.00	117.00	37.01	0.76	0.49666666666666676	0.7516666666666666	-0.25499999999999984	2.64830054372942e-05	0.00016345442548471582	N
AT1G26150|AT1G26150|1|-	2264.6	9039783	1:9039628-9039984	44.81	147.56	0.23	34.26	138.12	0.20	19.88	144.94	0.12	36.09	122.68	0.23	26.38	145.63	0.15	20.67	136.63	0.13	46.74	184.02	0.20	125.81	309.32	0.29	92.28	235.98	0.28	75.32	209.02	0.26	107.60	345.17	0.24	137.78	292.12	0.32	0.17666666666666667	0.265	-0.08833333333333335	0.021855946330568934	0.05906514514192644	N
AT1G26160|AT1G26160|1|-	995.0	9044668	1:9044422-9044869	34.68	94.45	0.27	50.45	79.52	0.39	31.90	103.84	0.24	33.47	94.11	0.26	29.56	115.96	0.20	48.38	99.09	0.33	51.17	118.82	0.30	84.87	163.86	0.34	63.30	119.76	0.35	75.85	205.32	0.27	51.65	122.09	0.30	38.60	160.70	0.19	0.2816666666666667	0.2916666666666667	-0.010000000000000009	0.9033331613297574	1.0	N
AT1G26170|AT1G26170|1|-	2145.7	9047388	1:9047292-9047589	7.39	65.11	0.10	11.31	64.58	0.15	4.55	46.39	0.09	0.00	38.16	0.00	7.99	73.86	0.10	3.80	52.25	0.07	15.40	56.08	0.22	9.03	78.26	0.10	9.96	73.30	0.12	9.98	87.94	0.10	14.70	90.35	0.14	4.68	85.40	0.05	0.085	0.12166666666666669	-0.03666666666666668	0.5910683765963851	0.7695815589934851	N
AT1G26180|AT1G26180|1|+	470.6	9056716	1:9056407-9056941	65.85	62.89	0.51	85.66	74.25	0.54	64.79	55.03	0.54	67.98	42.10	0.62	61.93	62.60	0.50	78.22	78.08	0.50	108.34	52.99	0.67	129.96	55.14	0.70	120.69	17.45	0.87	44.51	71.65	0.38	93.59	55.06	0.63	157.05	0.00	1.00	0.535	0.7083333333333334	-0.17333333333333334	0.00126087687131984	0.00517313520656699	N
AT1G26230|AT1G26230|1|-	283.6	9072405	1:9072256-9072606	60.89	39.02	0.61	50.45	56.68	0.47	53.04	23.32	0.69	71.51	31.17	0.70	65.83	17.69	0.79	52.96	54.15	0.49	68.03	32.73	0.68	83.18	33.15	0.72	86.76	31.65	0.73	70.21	43.39	0.62	123.90	21.90	0.85	72.84	21.30	0.77	0.625	0.7283333333333334	-0.10333333333333339	0.0743679761357833	0.16291767611580216	N
AT1G26270|AT1G26270|1|-	5331.9	9091717	1:9089469-9091918	193.23	0.00	1.00	188.56	0.00	1.00	264.16	0.00	1.00	193.11	0.00	1.00	174.57	0.00	1.00	181.19	0.00	1.00	207.03	0.00	1.00	147.77	0.00	1.00	160.50	0.00	1.00	196.02	0.00	1.00	158.34	0.00	1.00	183.85	0.00	1.00	1.0	1.0	0.0	1.0	1.0	N
AT1G26300|AT1G26300|1|-	525.7	9095887	1:9095768-9096088	2.17	52.28	0.04	5.21	32.44	0.14	9.96	43.87	0.19	4.62	34.67	0.12	9.71	34.68	0.22	10.92	34.09	0.24	15.53	75.77	0.17	53.06	73.90	0.42	25.18	92.01	0.21	25.91	76.54	0.25	73.60	103.54	0.42	19.70	131.33	0.13	0.15833333333333333	0.2666666666666666	-0.10833333333333328	0.1564942200005664	0.2907240725641481	N
AT1G26340|AT1G26340|1|+	241.5	9114793	1:9114502-9114977	29.82	32.99	0.47	33.39	48.71	0.41	19.46	36.85	0.35	12.81	49.54	0.21	15.85	35.95	0.31	30.08	55.86	0.35	34.00	44.38	0.43	49.39	56.75	0.47	44.73	76.57	0.37	19.53	49.75	0.28	56.40	57.96	0.49	36.31	68.91	0.35	0.35000000000000003	0.3983333333333334	-0.04833333333333334	0.5154722745044176	0.7001358115015128	N
AT1G26370|AT1G26370|1|-	211.0	9121601	1:9121443-9121839	17.24	50.53	0.25	18.96	21.97	0.46	13.24	35.55	0.27	14.18	38.02	0.27	11.71	26.69	0.30	14.21	53.28	0.21	33.61	45.17	0.43	52.21	9.31	0.85	38.81	31.29	0.55	8.05	44.45	0.15	35.95	30.83	0.54	41.12	26.77	0.61	0.29333333333333333	0.5216666666666666	-0.22833333333333328	0.00817957997480347	0.025852571949625345	N
AT1G26440|AT1G26440|1|-	1596.9	9144072	1:9143937-9144273	28.53	107.28	0.21	31.88	146.78	0.18	30.24	130.69	0.19	9.94	134.27	0.07	13.47	128.54	0.09	13.13	154.09	0.08	38.18	137.79	0.22	40.83	161.99	0.20	22.96	144.96	0.14	32.43	137.33	0.19	26.89	146.09	0.16	42.08	189.51	0.18	0.1366666666666667	0.18166666666666667	-0.044999999999999984	0.3018800101476671	0.4825209063575843	N
AT1G26460|AT1G26460|1|+	679.7	9154542	1:9154213-9154762	30.33	85.79	0.26	26.76	80.45	0.25	14.87	88.73	0.14	31.30	76.34	0.29	13.42	83.01	0.14	30.40	88.53	0.26	30.60	76.02	0.29	54.39	71.79	0.43	34.40	89.48	0.28	49.84	68.86	0.42	88.03	98.54	0.47	35.67	119.00	0.23	0.22333333333333336	0.35333333333333333	-0.12999999999999998	0.03348700113567221	0.08441408683033354	N
AT1G26470|AT1G26470|1|+	1217.4	9156151	1:9155950-9156279	19.75	46.29	0.30	10.86	66.78	0.14	5.75	57.23	0.09	4.35	25.94	0.14	21.21	63.81	0.25	5.36	82.46	0.06	24.41	60.66	0.29	20.24	86.40	0.19	48.66	61.07	0.44	35.39	114.49	0.24	30.69	108.20	0.22	21.62	105.63	0.17	0.16333333333333333	0.2583333333333333	-0.09499999999999997	0.1983961101191264	0.350357587747247	N
AT1G26550|AT1G26550|1|+	28155.6	9172875	1:9172674-9173033	14.68	329.84	0.04	13.87	367.54	0.04	22.58	367.55	0.06	12.58	305.92	0.04	13.38	355.37	0.04	11.45	346.16	0.03	70.83	576.93	0.11	96.72	769.00	0.11	110.01	778.53	0.12	62.94	634.22	0.09	105.27	773.24	0.12	80.71	946.02	0.08	0.041666666666666664	0.10499999999999998	-0.06333333333333332	0.0001015964904879612	0.0005540967760586555	N
AT1G26560|AT1G26560|1|+	2871.2	9181733	1:9181440-9181967	35.40	157.65	0.18	26.13	183.03	0.12	16.37	157.29	0.09	24.07	280.31	0.08	30.50	179.79	0.15	24.86	152.14	0.14	37.44	291.80	0.11	50.53	423.42	0.11	64.22	369.30	0.15	51.59	270.85	0.16	35.00	391.02	0.08	43.83	250.53	0.15	0.12666666666666668	0.12666666666666668	0.0	1.0	1.0	N
AT1G26630|AT1G26630|1|+	1377783.9	9207180	1:9206972-9207383	1128.12	2062.22	0.35	1116.56	1839.66	0.38	1066.89	2005.49	0.35	944.20	1886.50	0.33	965.17	1803.30	0.35	789.04	1659.11	0.32	1707.33	2715.74	0.39	2721.71	2990.65	0.48	2122.24	2164.45	0.50	2316.91	2221.00	0.51	3180.33	1808.15	0.64	2698.12	2550.12	0.51	0.3466666666666667	0.505	-0.15833333333333333	1.6983408785132433e-41	1.5482947990629446e-39	N
AT1G26640|AT1G26640|1|-	1162.6	9207514	1:9207417-9207715	31.25	46.05	0.40	28.20	56.68	0.33	42.02	45.09	0.48	22.93	65.90	0.26	51.95	17.93	0.74	42.29	78.85	0.35	75.79	37.84	0.67	84.85	79.73	0.52	106.94	29.35	0.78	94.66	75.44	0.56	45.20	112.01	0.29	147.98	15.85	0.90	0.4266666666666667	0.62	-0.1933333333333333	0.004391278709247352	0.015146177207147149	N
AT1G26660|AT1G26660|1|+	134.3	9213895	1:9213694-9214004	14.71	23.25	0.39	27.85	2.80	0.91	12.27	22.47	0.35	NA	NA	NA	9.09	30.43	0.23	30.95	22.95	0.57	24.69	37.57	0.40	28.57	54.05	0.35	29.59	23.11	0.56	15.59	49.20	0.24	18.77	33.64	0.36	25.66	40.82	0.39	0.48999999999999994	0.38333333333333336	0.10666666666666658	0.4025126029705875	0.593525409662966	N
AT1G26670|AT1G26670|1|+	31499.0	9217842	1:9217641-9218010	250.80	538.67	0.32	262.37	494.02	0.35	296.96	480.87	0.38	222.91	502.51	0.31	238.71	463.97	0.34	310.16	509.67	0.38	247.28	451.23	0.35	402.57	490.40	0.45	364.99	437.21	0.45	354.63	404.12	0.47	525.14	374.16	0.58	520.27	487.59	0.52	0.3466666666666667	0.47	-0.1233333333333333	9.482643679765933e-08	9.385361578270327e-07	N
AT1G26690|AT1G26690|1|-	453.6	9224242	1:9224059-9224443	33.04	57.53	0.36	20.50	60.24	0.25	21.20	57.54	0.27	43.56	42.99	0.50	31.15	69.91	0.31	41.76	97.61	0.30	51.57	61.57	0.46	53.29	80.39	0.40	69.97	74.23	0.49	30.44	33.43	0.48	86.20	37.95	0.69	86.15	45.52	0.65	0.33166666666666667	0.5283333333333333	-0.19666666666666666	0.003491660503012244	0.012503290240876637	N
AT1G26740|AT1G26740|1|-	601.5	9245148	1:9244981-9245349	14.90	35.03	0.30	12.80	50.40	0.20	15.44	52.71	0.23	22.19	39.50	0.36	6.12	33.35	0.16	13.49	29.93	0.31	40.39	53.82	0.43	44.71	70.09	0.39	34.39	55.08	0.38	35.48	71.68	0.33	81.88	47.78	0.63	33.99	105.64	0.24	0.25999999999999995	0.4000000000000001	-0.14000000000000012	0.08464365113209975	0.1808048068142036	N
AT1G26750|AT1G26750|1|+	938.3	9248049	1:9247787-9248152	91.74	28.39	0.76	91.94	0.00	1.00	85.55	17.75	0.83	63.69	37.11	0.63	73.43	25.65	0.74	50.04	43.25	0.54	86.25	63.05	0.58	145.93	38.89	0.79	165.97	2.60	0.98	190.53	0.00	1.00	242.73	0.00	1.00	213.20	0.00	1.00	0.75	0.8916666666666666	-0.1416666666666666	0.0003930935045840003	0.0018506746506885177	N
AT1G26761|AT1G26761|1|-	4338.4	9251456	1:9250041-9251659	203.68	0.00	1.00	219.60	0.00	1.00	179.44	0.00	1.00	225.09	0.00	1.00	178.57	0.00	1.00	188.00	0.00	1.00	231.93	0.00	1.00	252.32	0.00	1.00	253.87	0.00	1.00	212.59	0.00	1.00	260.26	0.00	1.00	216.80	0.00	1.00	1.0	1.0	0.0	1.0	1.0	N
AT1G26770|AT1G26770|1|+	1849.5	9260942	1:9260486-9261313	73.44	200.21	0.27	116.99	217.46	0.35	57.74	168.31	0.26	103.73	219.49	0.32	88.33	290.17	0.23	99.62	216.50	0.32	64.80	118.32	0.35	51.06	120.85	0.30	35.20	101.36	0.26	29.99	118.94	0.20	81.59	85.32	0.49	58.01	140.52	0.29	0.2916666666666667	0.315	-0.023333333333333317	0.5310173996693954	0.7145186053506815	N
AT1G26830|AT1G26830|1|+	4955.6	9296538	1:9296337-9298629	227.82	0.00	1.00	232.11	0.00	1.00	214.06	0.00	1.00	246.49	0.00	1.00	223.79	0.00	1.00	222.65	0.00	1.00	177.18	0.00	1.00	139.42	0.00	1.00	152.66	0.00	1.00	150.43	0.00	1.00	140.00	0.00	1.00	142.69	0.00	1.00	1.0	1.0	0.0	1.0	1.0	N
AT1G26850|AT1G26850|1|-	35326.4	9301119	1:9300806-9301371	272.35	473.32	0.37	248.52	468.30	0.35	243.54	470.65	0.34	276.20	357.49	0.44	249.10	403.98	0.38	194.65	488.79	0.28	311.14	504.67	0.38	540.51	352.12	0.61	402.17	476.81	0.46	387.40	575.05	0.40	485.00	568.58	0.46	498.05	362.90	0.58	0.36000000000000004	0.4816666666666667	-0.12166666666666665	9.61304925870561e-07	8.081630328575098e-06	N
AT1G26880|AT1G26880|1|-	170900.0	9315544	1:9315305-9315929	260.48	341.82	0.43	192.46	453.24	0.30	192.49	401.71	0.32	210.02	382.66	0.35	179.36	333.03	0.35	146.03	412.79	0.26	212.21	683.72	0.24	282.20	819.63	0.26	156.16	644.94	0.19	232.21	710.46	0.25	269.07	821.30	0.25	287.98	717.77	0.29	0.33499999999999996	0.24666666666666667	0.08833333333333329	0.00014776182395820128	0.0007727943393013928	N
AT1G26910|AT1G26910|1|+	446.6	9322861	1:9322660-9323028	24.21	31.83	0.43	17.36	52.64	0.25	10.97	55.13	0.17	20.23	37.08	0.35	13.29	41.65	0.24	15.44	56.96	0.21	21.13	95.30	0.18	38.90	77.16	0.34	18.71	64.63	0.22	20.24	107.50	0.16	68.15	69.18	0.50	43.62	106.04	0.29	0.27499999999999997	0.2816666666666667	-0.00666666666666671	0.7304033535567824	0.8878309632163606	N
AT1G26920|AT1G26920|1|+	60032.8	9330155	1:9329493-9330612	83.60	529.67	0.14	66.63	553.03	0.11	83.90	512.90	0.14	64.97	448.40	0.13	61.29	557.73	0.10	58.01	519.09	0.10	116.69	720.20	0.14	174.60	773.20	0.18	113.68	920.92	0.11	183.27	760.92	0.19	156.67	750.21	0.17	177.46	787.99	0.18	0.12	0.16166666666666665	-0.04166666666666666	0.013795886758721912	0.04000283826128381	N
AT1G26940|AT1G26940|1|+	343.3	9345143	1:9344942-9345323	4.07	39.30	0.09	NA	NA	NA	4.75	28.39	0.14	NA	NA	NA	NA	NA	NA	0.27	48.28	0.01	4.64	36.68	0.11	0.18	68.47	0.00	0.00	37.70	0.00	2.41	56.82	0.04	3.61	69.41	0.05	1.56	83.55	0.02	0.08	0.03666666666666667	0.043333333333333335	0.3933316958878713	0.5845149425322794	N
AT1G26945|AT1G26945|1|+	3251.9	9352520	1:9352319-9352833	170.62	167.45	0.50	187.46	129.61	0.59	144.69	178.36	0.45	109.04	167.96	0.39	161.00	150.28	0.52	168.62	205.43	0.45	136.21	158.66	0.46	245.34	111.17	0.69	202.63	105.00	0.66	231.19	0.00	1.00	261.92	66.79	0.80	181.15	65.52	0.73	0.48333333333333334	0.7233333333333333	-0.23999999999999994	7.77946729954852e-09	9.269132680529214e-08	N
AT1G26960|AT1G26960|1|+	157.3	9357150	1:9356949-9357502	16.91	13.81	0.55	35.72	3.49	0.91	10.95	22.67	0.33	17.52	21.93	0.44	8.18	24.51	0.25	31.60	9.91	0.76	22.80	19.59	0.54	34.83	9.56	0.78	30.04	34.76	0.46	34.77	2.92	0.92	10.61	51.93	0.17	41.99	43.18	0.49	0.54	0.56	-0.020000000000000018	0.8322923508708256	0.965163856996545	N
AT1G27000|AT1G27000|1|+	4673.8	9376620	1:9376401-9376788	82.47	193.87	0.30	79.55	225.70	0.26	57.51	179.69	0.24	55.50	157.99	0.26	73.99	196.04	0.27	61.74	187.36	0.25	125.64	279.50	0.31	143.28	406.47	0.26	109.27	335.02	0.25	106.22	240.37	0.31	164.90	355.37	0.32	166.45	302.28	0.36	0.26333333333333336	0.3016666666666667	-0.03833333333333333	0.343874764759112	0.5301913944780909	N
AT1G27030|AT1G27030|1|+	2154.6	9383850	1:9383626-9384060	34.14	268.36	0.11	35.83	207.63	0.15	36.68	292.69	0.11	28.52	260.53	0.10	19.02	225.77	0.08	32.28	322.17	0.09	10.58	161.63	0.06	17.98	148.10	0.11	12.35	106.33	0.10	22.81	173.06	0.12	17.34	141.86	0.11	30.00	163.74	0.15	0.10666666666666665	0.10833333333333334	-0.0016666666666666913	1.0	1.0	N
AT1G27050|AT1G27050|1|+	520.2	9394390	1:9394133-9394716	34.36	92.56	0.27	16.08	136.95	0.11	20.87	79.64	0.21	25.05	104.04	0.19	26.42	94.57	0.22	36.57	106.98	0.25	44.23	71.70	0.38	40.73	81.96	0.33	62.70	60.53	0.51	59.54	99.41	0.37	59.87	100.17	0.37	47.17	98.90	0.32	0.20833333333333334	0.37999999999999995	-0.1716666666666666	0.0018918273288695418	0.007334955897937798	N
AT1G27070|AT1G27070|1|-	188.1	9396776	1:9396673-9397040	46.03	6.64	0.87	63.27	4.18	0.94	40.35	27.97	0.59	24.72	32.24	0.43	41.40	8.99	0.82	26.56	34.98	0.43	58.62	1.91	0.97	103.53	0.00	1.00	63.61	19.41	0.77	84.58	0.00	1.00	67.00	7.99	0.89	90.09	5.21	0.95	0.68	0.93	-0.25	6.702722756184677e-05	0.0003777932843346973	N
AT1G27090|AT1G27090|1|-	26792.4	9404196	1:9403905-9404397	456.16	221.58	0.67	459.14	271.51	0.63	618.71	149.36	0.81	394.50	279.29	0.59	520.22	216.56	0.71	503.50	72.12	0.87	765.18	173.29	0.82	1074.27	0.00	1.00	857.28	190.83	0.82	851.75	200.42	0.81	992.74	0.00	1.00	981.81	0.00	1.00	0.7133333333333334	0.9083333333333332	-0.19499999999999984	1.061064213199695e-25	5.463106262469103e-24	N
AT1G27100|AT1G27100|1|-	19350.8	9407405	1:9407085-9407841	49.42	293.75	0.14	54.78	339.09	0.14	106.64	486.20	0.18	51.00	368.66	0.12	65.27	262.90	0.20	32.83	301.25	0.10	188.59	566.60	0.25	275.49	564.52	0.33	183.60	552.70	0.25	246.03	582.81	0.30	238.48	526.44	0.31	277.12	600.37	0.32	0.14666666666666667	0.2933333333333334	-0.14666666666666672	1.5257580881419843e-08	1.7209373577601474e-07	N
AT1G27120|AT1G27120|1|+	446.7	9423906	1:9423701-9424084	39.11	81.06	0.33	12.41	58.11	0.18	17.46	63.82	0.21	25.64	61.16	0.30	33.04	34.97	0.49	29.23	45.45	0.39	40.12	78.09	0.34	39.92	81.71	0.33	26.65	76.79	0.26	26.86	56.78	0.32	56.73	60.54	0.48	40.47	64.10	0.39	0.31666666666666665	0.35333333333333333	-0.03666666666666668	0.6427373100366376	0.8154660737385824	N
AT1G27130|AT1G27130|1|+	20072.0	9426535	1:9426241-9426897	112.50	402.00	0.22	95.36	372.95	0.20	155.83	517.51	0.23	126.57	288.21	0.31	108.59	437.75	0.20	117.35	372.47	0.24	202.14	619.19	0.25	313.43	520.10	0.38	202.36	577.93	0.26	250.31	645.04	0.28	300.76	494.28	0.38	334.25	484.58	0.41	0.2333333333333333	0.3266666666666666	-0.0933333333333333	0.0001995946070075472	0.0010124408421817237	N
AT1G27150|AT1G27150|1|+	3290.7	9432183	1:9431982-9432310	10.20	79.03	0.11	24.72	58.58	0.30	5.95	60.82	0.09	NA	NA	NA	12.55	76.21	0.14	15.85	72.27	0.18	19.52	89.24	0.18	13.93	109.88	0.11	15.61	113.00	0.12	20.69	95.18	0.18	11.36	94.30	0.11	7.73	125.36	0.06	0.164	0.12666666666666668	0.03733333333333333	0.528540170506088	0.7124167215736359	N
AT1G27210|AT1G27210|1|-	3786.0	9455480	1:9455277-9455681	36.57	211.88	0.15	23.29	193.76	0.11	52.83	235.01	0.18	41.09	113.41	0.27	34.30	159.54	0.18	30.05	143.76	0.17	89.69	263.74	0.25	143.36	275.16	0.34	106.72	276.20	0.28	94.33	357.79	0.21	163.09	310.26	0.34	161.75	240.81	0.40	0.17666666666666664	0.3033333333333334	-0.12666666666666676	0.00023715335460625385	0.0011848129133847885	N
AT1G27290|AT1G27290|1|+	54246.3	9482761	1:9482560-9482992	97.78	221.85	0.31	94.70	265.22	0.26	138.98	344.38	0.29	57.74	194.89	0.23	69.11	222.01	0.24	20.08	267.73	0.07	127.32	497.72	0.20	175.44	563.75	0.24	121.37	534.84	0.18	227.69	490.34	0.32	120.87	522.29	0.19	240.17	546.33	0.31	0.23333333333333336	0.24	-0.006666666666666626	0.9378172699129508	1.0	N
AT1G27300|AT1G27300|1|+	2119.1	9484159	1:9483754-9484316	164.96	35.49	0.82	192.21	59.94	0.76	191.02	51.59	0.79	137.57	45.59	0.75	128.90	70.64	0.65	174.63	42.51	0.80	200.62	94.72	0.68	314.28	0.00	1.00	249.62	83.84	0.75	266.74	60.50	0.82	261.64	38.34	0.87	380.28	0.00	1.00	0.7616666666666667	0.8533333333333334	-0.09166666666666667	0.00802976247422177	0.025476293009687657	N
AT1G27310|AT1G27310|1|-	18900.2	9484485	1:9484368-9484686	220.47	221.04	0.50	285.22	149.15	0.66	255.75	208.20	0.55	192.70	162.49	0.54	217.47	235.40	0.48	167.77	281.33	0.37	429.08	206.12	0.68	688.10	237.48	0.74	600.20	217.82	0.73	499.61	368.19	0.58	734.87	249.73	0.75	608.05	282.21	0.68	0.5166666666666667	0.6933333333333334	-0.17666666666666664	4.958758263942465e-10	7.019256534016563e-09	N
AT1G27320|AT1G27320|1|+	3726.8	9492474	1:9492196-9492632	128.50	170.16	0.43	126.43	157.72	0.44	95.52	161.39	0.37	85.44	200.84	0.30	70.12	165.46	0.30	73.62	210.50	0.26	118.00	257.77	0.31	217.77	217.05	0.50	164.09	222.12	0.42	153.63	218.73	0.41	106.43	185.95	0.36	217.38	163.35	0.57	0.35000000000000003	0.4283333333333333	-0.07833333333333325	0.03455048119082722	0.08672092235242489	N
AT1G27330|AT1G27330|1|+	10513.1	9494053	1:9493852-9494382	0.67	134.87	0.00	0.11	151.30	0.00	0.24	148.87	0.00	0.79	118.51	0.01	0.28	159.98	0.00	2.93	218.80	0.01	0.48	238.97	0.00	1.02	281.14	0.00	2.06	244.53	0.01	1.22	251.81	0.00	1.66	230.63	0.01	0.21	329.94	0.00	0.0033333333333333335	0.0033333333333333335	0.0	1.0	1.0	N
AT1G27340|AT1G27340|1|+	2141.4	9496807	1:9496606-9498000	193.24	0.00	1.00	171.42	0.00	1.00	188.29	0.00	1.00	188.15	0.00	1.00	156.59	16.64	0.90	158.14	0.00	1.00	152.01	0.00	1.00	146.45	0.00	1.00	156.17	0.00	1.00	127.93	0.00	1.00	156.81	0.00	1.00	151.05	0.00	1.00	0.9833333333333334	1.0	-0.016666666666666607	0.50245014245006	0.6883595678396747	N
AT1G27350|AT1G27350|1|-	18054.1	9498164	1:9498085-9498365	42.04	166.42	0.20	23.67	197.50	0.11	25.91	152.98	0.14	6.03	176.48	0.03	20.08	181.39	0.10	20.99	221.56	0.09	38.16	270.05	0.12	40.80	353.60	0.10	28.99	261.44	0.10	35.21	300.90	0.10	32.31	318.99	0.09	15.28	366.28	0.04	0.11166666666666665	0.09166666666666667	0.019999999999999976	0.4597191388848168	0.6488423496671065	N
AT1G27370|AT1G27370|1|-	968.9	9505765	1:9505112-9505966	39.91	9.79	0.80	47.32	18.29	0.72	41.21	8.50	0.83	37.96	4.24	0.90	47.24	10.23	0.82	50.28	26.87	0.65	70.71	13.79	0.84	73.35	0.00	1.00	58.44	23.65	0.71	65.01	20.20	0.76	65.60	17.95	0.79	85.97	0.00	1.00	0.7866666666666667	0.85	-0.06333333333333324	0.36074750464909544	0.5497236549145931	N
AT1G27390|AT1G27390|1|-	2738.0	9513353	1:9513081-9513600	93.00	129.32	0.42	90.95	139.39	0.39	82.77	100.82	0.45	68.48	113.91	0.38	117.02	101.36	0.54	81.76	112.22	0.42	119.37	118.58	0.50	181.56	92.78	0.66	159.59	106.01	0.60	147.77	109.72	0.57	187.13	138.05	0.58	131.10	119.21	0.52	0.43333333333333335	0.5716666666666667	-0.1383333333333333	0.002189748239454454	0.00833379098255799	N
AT1G27400|AT1G27400|1|+	149184.5	9516879	1:9516678-9517070	2.36	305.39	0.01	2.68	343.26	0.01	0.87	309.22	0.00	0.14	237.50	0.00	0.96	287.65	0.00	0.49	249.56	0.00	0.17	595.99	0.00	0.37	784.74	0.00	9.94	667.46	0.01	3.01	773.95	0.00	0.30	897.56	0.00	3.83	884.89	0.00	0.0033333333333333335	0.0016666666666666668	0.0016666666666666668	1.0	1.0	N
AT1G27430|AT1G27430|1|-	613.8	9520989	1:9520825-9521304	49.93	87.49	0.36	25.41	88.51	0.22	41.72	59.01	0.41	38.03	74.18	0.34	44.41	68.66	0.39	27.63	95.76	0.22	44.01	64.72	0.40	60.46	80.85	0.43	50.97	80.95	0.39	56.07	93.00	0.38	55.65	68.99	0.45	100.31	41.27	0.71	0.32333333333333336	0.46	-0.13666666666666666	0.02713436222484166	0.07077012005990856	N
AT1G27435|AT1G27435|1|-	5450.8	9527853	1:9527501-9528054	21.69	200.34	0.10	20.55	253.84	0.07	17.96	242.05	0.07	23.12	200.14	0.10	21.95	197.32	0.10	31.79	227.02	0.12	26.29	252.63	0.09	38.85	380.23	0.09	32.67	321.19	0.09	23.54	306.22	0.07	43.17	307.86	0.12	37.25	320.47	0.10	0.09333333333333334	0.09333333333333334	0.0	0.8867375427297196	0.9991709191522868	N
AT1G27440|AT1G27440|1|-	263.2	9529388	1:9528967-9529778	37.28	26.97	0.58	31.18	16.96	0.65	29.90	14.81	0.67	20.23	12.47	0.62	29.44	14.34	0.67	27.57	27.60	0.50	49.98	0.00	1.00	53.29	8.55	0.86	26.22	20.83	0.56	29.19	29.12	0.50	42.59	0.00	1.00	60.47	0.00	1.00	0.615	0.82	-0.20499999999999996	0.024385637014232703	0.06479146390653218	N
AT1G27450|AT1G27450|1|+	17477.1	9533952	1:9533751-9534141	155.22	339.67	0.31	173.51	247.51	0.41	146.40	304.95	0.32	145.12	283.99	0.34	111.89	275.04	0.29	136.28	364.29	0.27	170.83	423.27	0.29	232.07	550.42	0.30	187.71	537.42	0.26	174.00	529.73	0.25	200.26	649.03	0.24	240.14	507.64	0.32	0.32333333333333336	0.27666666666666667	0.04666666666666669	0.07456033537189563	0.16326708959685474	N
AT1G27460|AT1G27460|1|+	635.3	9537448	1:9537114-9537614	16.74	42.26	0.28	34.63	57.40	0.38	16.00	63.24	0.20	29.46	26.23	0.53	18.75	31.02	0.38	10.19	72.28	0.12	58.66	110.59	0.35	122.94	16.85	0.88	135.14	59.45	0.69	192.44	12.58	0.94	100.00	49.50	0.67	126.08	89.17	0.59	0.315	0.6866666666666666	-0.37166666666666665	4.849249507205149e-08	5.035213412026914e-07	N
AT1G27510|AT1G27510|1|-	18793.9	9554845	1:9554710-9555046	56.07	208.31	0.21	63.88	175.75	0.27	44.33	158.08	0.22	32.01	169.11	0.16	48.78	182.33	0.21	47.00	186.69	0.20	44.31	252.99	0.15	84.88	406.61	0.17	60.62	447.77	0.12	67.38	499.38	0.12	90.78	559.72	0.14	57.41	462.99	0.11	0.21166666666666667	0.135	0.07666666666666666	0.008512223963170501	0.02676771187405863	N
AT1G27520|AT1G27520|1|+	1293.0	9562177	1:9561864-9562485	40.27	135.74	0.23	41.52	124.28	0.25	37.21	128.57	0.22	23.18	115.35	0.17	13.95	144.59	0.09	44.03	128.58	0.26	46.02	146.93	0.24	50.09	183.57	0.21	41.86	164.24	0.20	51.97	223.56	0.19	59.84	161.53	0.27	51.40	163.05	0.24	0.20333333333333334	0.22499999999999998	-0.02166666666666664	0.7067759038571243	0.8681073864691987	N
AT1G27530|AT1G27530|1|-	8137.4	9562672	1:9562487-9562890	22.23	241.29	0.08	22.15	228.89	0.09	28.27	234.41	0.11	25.26	193.33	0.12	22.88	203.38	0.10	24.02	226.54	0.10	57.71	314.24	0.16	101.97	515.11	0.17	61.86	416.41	0.13	71.42	442.21	0.14	73.04	394.61	0.16	63.01	488.81	0.11	0.09999999999999999	0.14500000000000002	-0.045000000000000026	0.10172927854901381	0.20719078518990577	N
AT1G27540|AT1G27540|1|-	2347.2	9566571	1:9565913-9567906	53.56	113.65	0.32	52.70	128.46	0.29	43.52	130.21	0.25	30.84	130.32	0.19	43.09	120.43	0.26	49.27	108.60	0.31	70.01	89.53	0.44	59.46	85.78	0.41	59.85	92.39	0.39	78.50	55.69	0.58	58.42	79.25	0.42	72.86	64.66	0.53	0.27	0.4616666666666666	-0.1916666666666666	0.0005677721289021481	0.002548306976016552	N
AT1G27650|AT1G27650|1|+	13838.1	9615902	1:9615137-9616357	199.43	199.92	0.50	239.97	167.22	0.59	242.37	199.94	0.55	253.31	165.68	0.60	192.14	225.17	0.46	220.78	207.56	0.52	273.18	217.95	0.56	305.82	153.54	0.67	292.75	187.86	0.61	287.35	222.76	0.56	298.17	137.65	0.68	366.14	86.65	0.81	0.5366666666666666	0.6483333333333333	-0.11166666666666669	0.0010291514476732698	0.00431869845250392	N
AT1G27690|AT1G27690|1|+	331.4	9638458	1:9637759-9638901	5.33	64.68	0.08	6.85	70.10	0.09	12.60	68.29	0.16	13.82	66.23	0.17	5.19	61.88	0.08	7.10	55.18	0.11	11.75	67.67	0.15	10.85	75.75	0.13	2.43	79.35	0.03	19.87	70.35	0.22	19.53	60.82	0.24	15.11	63.89	0.19	0.11499999999999999	0.16	-0.04500000000000001	0.4829281848157934	0.67098117624644	N
AT1G27750|AT1G27750|1|+	180.2	9661770	1:9661547-9661994	20.22	59.84	0.25	32.09	37.49	0.46	29.79	53.20	0.36	36.14	10.11	0.78	17.55	55.03	0.24	10.15	58.32	0.15	28.44	58.74	0.33	56.21	2.53	0.96	45.20	33.18	0.58	55.80	51.40	0.52	59.85	41.27	0.59	54.92	35.35	0.61	0.3733333333333333	0.5983333333333333	-0.22499999999999998	0.006064661260759888	0.02004464182363271	N
AT1G27752|AT1G27752|1|+	885.9	9667152	1:9666129-9667550	36.40	69.65	0.34	46.98	59.24	0.44	40.36	74.19	0.35	30.98	74.16	0.29	33.29	67.26	0.33	35.06	55.08	0.39	48.90	73.11	0.40	48.92	47.36	0.51	37.61	78.29	0.32	54.97	63.86	0.46	46.26	44.54	0.51	49.14	45.26	0.52	0.3566666666666667	0.45333333333333337	-0.09666666666666668	0.20624388995746498	0.36107215195689385	N
AT1G27760|AT1G27760|1|+	2633.6	9671476	1:9671275-9671632	44.74	176.01	0.20	48.99	213.48	0.19	43.32	186.37	0.19	80.44	237.85	0.25	44.61	199.13	0.18	54.68	177.45	0.24	51.48	137.54	0.27	46.12	234.67	0.16	37.19	102.23	0.27	21.28	155.02	0.12	131.05	99.10	0.57	68.57	160.66	0.30	0.20833333333333334	0.2816666666666667	-0.07333333333333333	0.06271203781248229	0.14214633205808314	N
AT1G27770|AT1G27770|1|-	1196.6	9671883	1:9671657-9672160	53.33	83.41	0.39	59.05	72.95	0.45	129.54	113.97	0.53	195.94	182.04	0.52	57.94	67.93	0.46	69.53	65.03	0.52	144.67	82.44	0.64	138.63	67.59	0.67	138.54	79.38	0.64	207.01	8.59	0.96	172.62	25.98	0.87	173.17	99.71	0.63	0.47833333333333333	0.735	-0.25666666666666665	9.308719150842134e-07	7.832408315149728e-06	N
AT1G27840|AT1G27840|1|-	1033.3	9693175	1:9693008-9693376	4.69	38.39	0.11	3.68	49.90	0.07	3.24	42.58	0.07	1.32	35.65	0.04	3.21	29.35	0.10	5.95	45.83	0.11	2.10	57.82	0.04	0.10	56.75	0.00	0.18	44.69	0.00	3.73	64.45	0.05	16.18	59.01	0.22	10.15	48.45	0.17	0.08333333333333333	0.08	0.003333333333333327	1.0	1.0	N
AT1G27850|AT1G27850|1|+	818.5	9703702	1:9703253-9703944	31.34	73.15	0.30	27.26	75.16	0.27	41.91	67.98	0.38	22.59	77.69	0.23	29.02	64.43	0.31	23.87	75.62	0.24	46.61	93.92	0.33	48.99	97.49	0.33	41.42	122.35	0.25	60.72	86.29	0.41	50.50	79.97	0.39	41.77	124.06	0.25	0.2883333333333334	0.32666666666666666	-0.038333333333333275	0.5779797999207505	0.7573029103128294	N
AT1G27900|AT1G27900|1|-	446.8	9715561	1:9715342-9715762	10.61	89.60	0.11	9.43	64.81	0.13	8.84	80.34	0.10	4.06	61.43	0.06	5.39	76.70	0.07	10.29	101.40	0.09	12.29	90.03	0.12	21.97	103.70	0.17	14.43	66.13	0.18	14.02	73.15	0.16	17.00	101.09	0.14	18.05	119.84	0.13	0.09333333333333332	0.15	-0.05666666666666667	0.27735184136442703	0.4535603493551571	N
AT1G27950|AT1G27950|1|+	64951.2	9741969	1:9741762-9742137	789.73	413.53	0.66	816.19	291.09	0.74	779.58	446.09	0.64	916.83	475.73	0.66	862.13	414.54	0.68	662.17	470.68	0.58	1241.87	560.65	0.69	1934.70	300.82	0.87	1475.27	447.39	0.77	1423.61	339.17	0.81	1723.17	227.03	0.88	1832.90	309.43	0.86	0.66	0.8133333333333335	-0.15333333333333343	3.186721824093546e-23	1.4459568386309393e-21	N
AT1G28060|AT1G28060|1|+	3811.1	9782538	1:9781613-9782907	46.31	119.36	0.28	38.71	119.06	0.25	41.79	111.72	0.27	36.84	115.65	0.24	47.71	83.86	0.36	35.56	109.97	0.24	45.61	128.28	0.26	56.66	105.62	0.35	33.11	142.08	0.19	60.32	142.46	0.30	26.82	121.95	0.18	85.35	91.18	0.48	0.2733333333333333	0.29333333333333333	-0.020000000000000018	0.7110074998810394	0.8709666575835661	N
AT1G28070|AT1G28070|1|+	345.0	9783864	1:9783517-9784091	28.60	56.71	0.34	39.01	56.15	0.41	34.67	45.78	0.43	37.70	33.97	0.53	27.75	61.93	0.31	11.00	62.53	0.15	26.54	47.00	0.36	63.47	13.23	0.83	41.81	41.74	0.50	33.73	41.66	0.45	56.84	0.00	1.00	53.33	18.71	0.74	0.36166666666666664	0.6466666666666666	-0.285	0.0011942191597306522	0.0049240480457441865	N
AT1G28090|AT1G28090|1|+	450.2	9798897	1:9798694-9799116	18.66	73.59	0.20	19.14	62.68	0.23	13.49	61.67	0.18	28.26	39.21	0.42	7.39	58.94	0.11	12.87	74.25	0.15	39.63	39.52	0.50	28.61	86.65	0.25	33.65	125.55	0.21	36.85	132.14	0.22	18.47	118.94	0.13	54.31	77.52	0.41	0.215	0.2866666666666667	-0.07166666666666668	0.4048680261308971	0.5961140281023448	N
AT1G28110|AT1G28110|1|-	1594.2	9803779	1:9803641-9804131	36.63	69.24	0.35	36.47	62.42	0.37	33.73	64.06	0.34	26.27	74.86	0.26	30.64	44.17	0.41	45.50	86.14	0.35	43.45	72.93	0.37	36.96	108.37	0.25	38.86	69.70	0.36	37.61	110.59	0.25	29.43	106.76	0.22	50.29	113.33	0.31	0.3466666666666667	0.29333333333333333	0.053333333333333344	0.47614509354554235	0.6641569054691262	N
AT1G28120|AT1G28120|1|-	5561.1	9813041	1:9812930-9813242	19.95	205.15	0.09	17.46	146.54	0.11	16.28	159.01	0.09	15.76	144.62	0.10	19.07	119.51	0.14	12.51	177.37	0.07	13.51	187.92	0.07	53.12	239.15	0.18	31.15	297.98	0.09	25.73	241.64	0.10	37.86	304.25	0.11	61.43	263.74	0.19	0.10000000000000002	0.12333333333333334	-0.023333333333333317	0.29248810543695014	0.47106228585526316	N
AT1G28130|AT1G28130|1|+	3183.1	9827693	1:9827294-9828118	94.87	185.40	0.34	52.66	186.76	0.22	99.72	223.36	0.31	50.92	153.10	0.25	93.42	183.29	0.34	104.91	168.68	0.38	133.18	175.19	0.43	146.89	198.79	0.42	80.99	314.99	0.20	109.77	218.94	0.33	96.23	245.48	0.28	116.34	228.93	0.34	0.3066666666666667	0.3333333333333333	-0.026666666666666616	0.6614049771177433	0.8313156156866955	N
AT1G28140|AT1G28140|1|-	1725.5	9832880	1:9831876-9833127	12.29	238.20	0.05	7.68	221.21	0.03	7.52	165.54	0.04	8.89	164.93	0.05	10.19	199.98	0.05	10.16	234.29	0.04	7.75	357.31	0.02	7.94	541.65	0.01	12.72	426.27	0.03	7.88	426.98	0.02	12.99	572.49	0.02	10.26	455.27	0.02	0.04333333333333333	0.02	0.023333333333333327	0.11783620461710761	0.2331153424806288	N
AT1G28150|AT1G28150|1|-	11327.1	9835069	1:9834642-9835304	26.99	275.65	0.09	38.25	379.51	0.09	26.62	307.22	0.08	19.54	267.72	0.07	25.75	323.75	0.07	22.99	349.10	0.06	41.60	359.73	0.10	46.58	444.11	0.09	47.99	492.13	0.09	58.76	479.30	0.11	60.12	565.46	0.10	49.87	505.30	0.09	0.07666666666666667	0.09666666666666666	-0.01999999999999999	0.32937108086585243	0.5137278968080325	N
AT1G28200|AT1G28200|1|-	1550.8	9850353	1:9849844-9850574	14.31	185.07	0.07	21.09	152.19	0.12	16.67	173.13	0.09	6.99	121.58	0.05	16.03	132.65	0.11	15.49	217.80	0.07	22.60	190.54	0.11	25.72	208.23	0.11	22.75	225.91	0.09	38.02	310.19	0.11	27.91	219.30	0.11	27.36	229.10	0.11	0.085	0.10666666666666667	-0.021666666666666667	0.5126168132555561	0.6976952846624381	N
AT1G28230|AT1G28230|1|-	1906.3	9862230	1:9862041-9862562	36.62	109.84	0.25	44.50	121.66	0.27	27.95	117.51	0.19	39.52	74.53	0.35	46.81	111.65	0.30	47.16	112.17	0.30	75.56	74.69	0.50	72.50	129.43	0.36	53.43	90.94	0.37	38.63	151.21	0.20	61.61	109.69	0.36	84.75	124.82	0.40	0.27666666666666667	0.365	-0.08833333333333332	0.09498575061308914	0.19680429604717825	N
AT1G28240|AT1G28240|1|-	690.0	9868452	1:9868257-9868751	20.89	106.78	0.16	24.53	105.43	0.19	26.04	91.67	0.22	35.66	104.13	0.26	35.44	75.01	0.32	39.18	98.05	0.29	20.10	129.18	0.13	33.95	110.36	0.24	25.92	134.45	0.16	20.20	142.32	0.12	34.49	117.39	0.23	14.83	139.05	0.10	0.24	0.16333333333333333	0.07666666666666666	0.09674756762425024	0.19937382403197315	N
AT1G28250|AT1G28250|1|+	538.3	9875405	1:9875094-9875527	95.58	2.71	0.97	76.32	31.50	0.71	60.90	37.72	0.62	70.92	4.72	0.94	57.77	21.87	0.73	57.93	24.78	0.70	152.55	64.07	0.70	186.65	24.30	0.88	207.63	0.00	1.00	193.58	19.14	0.91	226.87	1.94	0.99	202.60	0.00	1.00	0.7783333333333333	0.9133333333333334	-0.13500000000000012	0.0019056641246937693	0.0073740593485521755	N
AT1G28260|AT1G28260|1|-	1996.7	9877360	1:9875579-9877561	110.82	0.00	1.00	103.42	0.00	1.00	155.97	0.00	1.00	97.03	0.00	1.00	119.47	0.00	1.00	117.82	0.00	1.00	129.51	0.00	1.00	109.71	0.00	1.00	100.63	0.00	1.00	101.53	0.00	1.00	93.63	0.00	1.00	126.32	0.00	1.00	1.0	1.0	0.0	1.0	1.0	N
[truncated: 8,842 more rows]
