# Supplementary material for: Nanopore direct RNA sequencing maps the complexity of Arabidopsis mRNA processing and m6A modification
Source: eLife. 2020 Jan 14;9:e49658. doi: 10.7554/eLife.49658 (PMC6959997; doi:10.7554/eLife.49658)
Supplement: Figure 7—source data 1. [file elife-49658-fig7-data1.xlsx]

## Sheet: vir1_vs_VIRc_nanopore_dPAS
gene_id	start	end	strand	ks	pval	fdr	most_reduced_site	most_increased_site	dist_between_most_reduced_and_increased
AT1G01010	3630	5899	+	0.182609	0.891044	0.995514	5902	5883	-19
AT1G01020	6787	9130	-	0.117233	0.599159	0.807785	6874	6862	12
AT1G01030	11648	13714	-	0.25	0.326992	0.55908	11602	13017	-1415
AT1G01040	23120	31227	+	0.149321	0.513191	0.739833	31172	31204	32
AT1G01050	31169	33171	-	0.206888	3.70562e-05	0.000345438	31204	31216	-12
AT1G01060	33364	37871	-	0.0537171	0.800971	0.948768	33777	33754	23
AT1G01070	38443	41017	-	0.356061	0.168415	0.358338	38751	38809	-58
AT1G01080	44969	47059	-	0.0936073	0.0903878	0.229127	45383	45354	29
AT1G01090	47233	49304	-	0.280613	2.15906e-27	2.25764e-25	47529	47612	-83
AT1G01100	49908	51210	-	0.0480207	0.00536136	0.0247435	50097	50175	-78
AT1G01110	51952	54737	+	0.236715	0.258278	0.478279	54719	54688	-31
AT1G01120	57163	59215	-	0.0355392	0.96798	1	57282	57288	-6
AT1G01130	61904	63811	-	0.351449	0.226854	0.440055	63648	63214	434
AT1G01140	64165	67774	-	0.198144	0.00318917	0.0161945	64160	64314	-154
AT1G01160	72338	74096	+	0.261136	8.40548e-05	0.000712136	74038	74050	12
AT1G01170	73930	74737	-	0.107933	0.00468748	0.0221405	73996	74046	-50
AT1G01180	75389	76845	+	0.23423	0.0401867	0.124727	76707	76647	-60
AT1G01210	88621	90502	+	0.17278	0.0437026	0.13294	89762	89693	-69
AT1G01220	91341	95681	+	0.163793	0.511495	0.738826	95667	95666	-1
AT1G01225	95934	97407	+	0.373188	0.17204	0.36352	97352	97276	-76
AT1G01230	97411	99240	+	0.0869857	0.457088	0.688388	99237	99194	-43
AT1G01240	99864	101987	+	0.0689706	0.760438	0.922627	101824	101835	11
AT1G01250	104439	105330	-	0.241327	0.129935	0.297277	104502	104479	23
AT1G01260	108945	111699	+	0.20236	0.00329548	0.0166439	111589	111539	-50
AT1G01290	114201	116407	+	0.242645	0.0465677	0.139397	116157	116095	-62
AT1G01300	116783	118845	+	0.096191	0.176237	0.369316	118657	118743	86
AT1G01320	121066	130577	-	0.244051	7.36492e-13	2.4592e-11	121141	121205	-64
AT1G01350	136089	138162	+	0.314286	0.00143171	0.00825672	138138	138078	-60
AT1G01360	141869	143261	+	0.075188	0.978594	1	143164	143195	31
AT1G01390	148012	149848	-	0.192308	0.900881	0.999596	148118	148741	-623
AT1G01420	154366	156178	-	0.230769	0.0261009	0.0891002	154410	154502	-92
AT1G01430	156476	158823	-	0.0518222	0.564247	0.779568	156725	156830	-105
AT1G01440	159627	162953	-	0.288953	0.0502876	0.147514	159810	159857	-47
AT1G01470	171524	172948	-	0.0240945	0.998502	1	172202	172188	14
AT1G01490	180016	182749	-	0.100229	0.0422154	0.129531	180125	180121	4
AT1G01500	185032	187135	+	0.330454	1.38257e-05	0.000142971	186786	186722	-64
AT1G01510	187144	190472	+	0.0813267	0.693012	0.879068	190158	190037	-121
AT1G01520	190407	192436	+	0.110599	0.902341	1	192316	192443	127
AT1G01540	195644	198787	+	0.328256	7.38231e-07	9.96048e-06	198600	198564	-36
AT1G01550	199526	201775	+	0.0761493	0.00419664	0.0202801	201755	201677	-78
AT1G01580	208994	213082	+	0.1125	0.997438	1	213078	213079	1
AT1G01600	218833	221286	+	0.270833	0.621976	0.825941	221164	221149	-15
AT1G01610	221641	224351	-	0.312067	3.75594e-13	1.31202e-11	221771	221792	-21
AT1G01620	225664	227543	-	0.037134	0.0278233	0.0934143	225871	225874	-3
AT1G01630	228798	230979	+	0.270221	3.42345e-09	7.13138e-08	230843	230774	-69
AT1G01640	230907	232630	-	0.477273	0.0693844	0.187774	231034	230993	41
AT1G01650	232839	237905	-	0.192075	0.0073609	0.0320796	233028	232959	69
AT1G01710	262827	266324	+	0.27451	0.0128929	0.0508133	266193	266224	31
AT1G01715	266332	267883	+	0.464912	0.0241454	0.083885	267579	267784	205
AT1G01720	267992	269819	+	0.123022	0.00674835	0.029852	269820	269768	-52
AT1G01725	269791	270859	-	0.156201	0.219507	0.430881	269842	269835	7
AT1G01730	270796	272189	+	0.183209	0.00160355	0.00909594	272010	271988	-22
AT1G01740	272110	274930	-	0.197628	0.615072	0.820612	271888	271906	-18
AT1G01760	276265	278599	-	0.363636	0.374369	0.608266	276457	275666	791
AT1G01770	278599	282891	+	0.32529	0.053194	0.153804	282330	284192	1862
AT1G01780	282760	284245	+	0.188889	0.432456	0.665323	284178	284192	14
AT1G01790	284349	291203	+	0.0986928	0.125379	0.289984	291073	291004	-69
AT1G01800	293245	295086	+	0.467289	3.84945e-25	3.32517e-23	295012	294977	-35
AT1G01820	296000	298334	-	0.136172	0.0148469	0.0569441	296060	296059	1
AT1G01830	298450	302310	-	0.129445	0.890464	0.995081	298600	298615	-15
AT1G01860	304132	306310	-	0.221458	0.0575053	0.162989	304136	304147	-11
AT1G01900	310168	313130	+	0.107143	0.988623	1	313109	313120	11
AT1G01910	313100	316090	-	0.114412	0.143648	0.319606	313308	313430	-122
AT1G01920	315982	319667	+	0.222538	0.20206	0.406729	319647	319568	-79
AT1G01930	319768	322895	-	0.245536	0.146281	0.324085	319872	319984	-112
AT1G01940	322885	324917	+	0.16731	0.225648	0.438817	324917	324858	-59
AT1G01950	325315	330619	+	0.257653	0.0512335	0.149581	330497	330509	12
AT1G01960	330587	337912	-	0.147483	0.0557992	0.15926	330598	330616	-18
AT1G01970	338240	340088	+	0.240335	0.00340845	0.0171057	340075	340067	-8
AT1G01990	342917	344400	-	0.0976451	0.332802	0.565062	343302	343241	61
AT1G02000	345515	347603	+	0.0782104	0.995108	1	347597	347523	-74
AT1G02010	347612	352545	+	0.469565	0.02382	0.0830987	352510	348454	-4056
AT1G02020	352611	355124	-	0.296296	0.00951429	0.0395574	352655	352695	-40
AT1G02050	359116	360746	-	0.319355	0.0701459	0.189158	359287	359097	190
AT1G02060	360917	363142	-	0.278195	0.293833	0.521633	361466	361830	-364
AT1G02080	373334	386913	+	0.092437	0.543227	0.762861	386825	386826	1
AT1G02090	387276	389808	-	0.15817	0.0690853	0.187283	387324	387279	45
AT1G02100	389811	392816	+	0.115327	0.347004	0.58025	392819	392786	-33
AT1G02110	392830	395528	+	0.169373	0.344316	0.577274	395532	395531	-1
AT1G02120	395688	400001	+	0.0837887	0.473019	0.703462	399901	399919	18
AT1G02130	399982	401919	-	0.121766	0.0288422	0.0962155	400097	400012	85
AT1G02140	403099	404456	-	0.0667093	0.184678	0.381601	403219	403285	-66
AT1G02145	404599	408619	+	0.188186	0.159001	0.343552	408614	408655	41
AT1G02150	408621	410680	+	0.161525	1.09813e-06	1.44245e-05	410571	410515	-56
AT1G02160	410743	411632	+	0.252656	4.07655e-06	4.75715e-05	411556	411513	-43
AT1G02170	411663	413554	+	0.13675	0.288914	0.515455	413572	413561	-11
AT1G02180	413521	414649	-	0.238095	0.641118	0.841169	413524	413481	43
AT1G02205	418415	422579	+	0.121543	0.255941	0.47567	422388	422417	29
AT1G02220	428649	430720	-	0.31941	0.291507	0.518837	428713	428760	-47
AT1G02260	440199	442972	-	0.35	0.0246748	0.0852198	440461	440652	-191
AT1G02270	443117	446296	-	0.545696	2.54737e-08	4.53393e-07	443175	443242	-67
AT1G02280	448422	450426	-	0.185902	3.07989e-05	0.000292075	448470	448489	-19
AT1G02290	450460	452743	-	0.570565	1.69886e-08	3.11798e-07	450522	450540	-18
AT1G02300	453106	455519	+	0.270833	0.128704	0.295355	455513	455472	-41
AT1G02305	455687	458164	+	0.129756	0.00242209	0.0128451	458126	458061	-65
AT1G02330	461945	463618	-	0.18063	0.0138101	0.0536666	462050	462096	-46
AT1G02335	463753	464981	-	0.100123	0.834573	0.96754	463868	463871	-3
AT1G02340	465615	467880	-	0.102374	5.01983e-06	5.74821e-05	465666	465764	-98
AT1G02350	469817	470693	+	0.0496421	0.887699	0.994228	470830	470806	-24
AT1G02360	471882	473336	-	0.137931	0.973122	1	471988	471987	1
AT1G02370	474372	476612	+	0.26721	0.0571746	0.162251	476612	476534	-78
AT1G02380	476944	479112	+	0.136364	0.971193	1	478960	478969	9
AT1G02400	486799	489651	+	0.143695	0.743189	0.911592	489604	489594	-10
AT1G02410	490859	492979	+	0.195417	0.0699569	0.188745	492920	492865	-55
AT1G02420	493638	495158	+	0.385417	0.0242988	0.0842543	495598	495586	-12
AT1G02475	513698	515422	-	0.376981	3.33405e-19	1.9847e-17	513874	513920	-46
AT1G02500	518090	520495	+	0.0901724	4.12315e-08	7.04659e-07	520356	520349	-7
AT1G02560	537739	540127	+	0.0684099	0.00561773	0.0256428	539986	539965	-21
AT1G02610	553018	556152	-	0.238562	0.0402508	0.124877	553036	553063	-27
AT1G02640	564017	567771	+	0.187195	0.250736	0.469288	567771	567689	-82
AT1G02660	571825	575085	-	0.256894	0.000684273	0.00438719	572042	572024	18
AT1G02680	580624	582310	+	0.236672	0.0695268	0.187999	582086	582064	-22
AT1G02690	584133	587327	+	0.10303	0.993879	1	587204	587220	16
AT1G02705	589583	590406	+	0.375291	0.0240102	0.0836333	590133	590238	105
AT1G02720	591681	594264	+	0.256494	0.0990215	0.244547	594225	594097	-128
AT1G02730	594501	598657	-	0.0952381	0.999593	1	594576	594598	-22
AT1G02740	599329	602199	-	0.125133	0.863504	0.982219	599371	599365	6
AT1G02750	602488	604387	+	0.375859	4.61074e-05	0.00041996	604281	604213	-68
AT1G02780	607798	609534	-	0.106558	1.99392e-17	1.04938e-15	607922	607945	-23
AT1G02816	621452	623054	+	0.250725	0.00115604	0.00689461	622335	622304	-31
AT1G02820	623655	624567	-	0.0739936	0.672822	0.864358	623776	623782	-6
AT1G02840	626638	629993	+	0.166369	0.000140427	0.00111282	629800	629784	-16
AT1G02850	630373	633420	+	0.0729619	0.562207	0.778251	633258	633162	-96
AT1G02860	635143	637262	+	0.264098	0.0195009	0.070845	637258	637166	-92
AT1G02870	637213	638681	-	0.174242	0.0266745	0.0905713	637298	637317	-19
AT1G02880	642504	644903	-	0.187463	0.23976	0.455776	642810	642909	-99
AT1G02890	645083	652001	-	0.0732302	0.759327	0.921696	645135	645122	13
AT1G02900	653603	654457	-	0.154365	0.555599	0.773671	653741	653791	-50
AT1G02910	655567	658216	-	0.0532787	0.922955	1	655579	655606	-27
AT1G02920	658577	659980	-	0.0934074	0.990357	1	658665	658664	1
AT1G02930	661087	662475	-	0.0845356	0.975562	1	661191	658679	2512
AT1G02950	665118	666471	-	0.134454	0.997749	1	665184	665132	52
AT1G02960	666806	669919	-	0.20081	0.152209	0.333499	666869	666921	-52
AT1G02990	681330	687385	-	0.145586	0.44164	0.674017	681489	681500	-11
AT1G03000	687794	692660	-	0.155269	0.35765	0.591703	687881	687905	-24
AT1G03020	697918	698591	-	0.151099	0.978228	1	698024	697904	120
AT1G03030	701364	703929	+	0.191472	0.299845	0.528366	703795	703774	-21
AT1G03040	703846	706689	-	0.272727	0.000180468	0.00138301	703906	703924	-18
AT1G03055	710017	711857	-	0.300766	0.22172	0.433565	710016	710046	-30
AT1G03060	712439	727553	-	0.123429	0.604581	0.81152	712469	712479	-10
AT1G03080	731553	738306	-	0.128606	0.617143	0.822546	731701	731719	-18
AT1G03090	739543	744184	+	0.0660522	0.760928	0.922939	743947	743942	-5
AT1G03100	743884	746479	-	0.371212	0.326401	0.558371	743893	743917	-24
AT1G03106	748100	749034	-	0.145833	0.700097	0.884096	748103	748094	9
AT1G03110	749245	751976	+	0.160008	0.285897	0.512397	751949	751913	-36
AT1G03130	753306	754262	-	0.0183811	0.114819	0.271649	753484	753411	73
AT1G03140	754260	756303	-	0.0592912	0.858012	0.980039	754378	754380	-2
AT1G03150	756413	758678	+	0.173559	0.0697887	0.188419	758646	758551	-95
AT1G03160	761260	766194	+	0.118768	0.362109	0.595732	766158	766159	1
AT1G03190	775526	780062	+	0.177778	0.764792	0.925577	780004	779995	-9
AT1G03210	782903	784346	+	0.401961	0.00375345	0.0184812	784298	784312	14
AT1G03220	786831	788722	+	0.119031	0.0163826	0.0616005	788547	788601	54
AT1G03230	789819	791689	+	0.154887	0.228433	0.441961	791515	791491	-24
AT1G03250	793314	795403	-	0.479411	2.31863e-13	8.33764e-12	793349	793372	-23
AT1G03260	795448	798491	-	0.287442	0.0348234	0.111522	795532	795563	-31
AT1G03270	799114	802625	+	0.181818	0.98517	1	802579	802560	-19
AT1G03280	802969	807066	+	0.281243	3.65805e-05	0.000341604	807016	806990	-26
AT1G03290	807360	813216	+	0.185834	0.0658497	0.180887	810796	810883	87
AT1G03300	811032	813086	-	0.277778	0.506054	0.733403	810878	810982	-104
AT1G03310	813412	816812	+	0.171996	0.10084	0.247835	816708	816696	-12
AT1G03330	817933	819563	-	0.0734694	0.688032	0.876463	818044	817982	62
AT1G03340	819611	821476	+	0.75	0.000333726	0.00236374	821433	821334	-99
AT1G03350	822581	824410	-	0.168637	0.0121511	0.0484278	822661	822651	10
AT1G03360	824516	826399	+	0.350042	0.000970954	0.00592412	826362	826286	-76
AT1G03365	826522	830393	+	0.250176	0.059814	0.168143	830295	830272	-23
AT1G03370	830549	835411	+	0.179412	0.358059	0.592128	835345	835362	17
AT1G03380	835766	841373	+	0.211777	0.00527923	0.0244274	840884	840899	15
AT1G03400	842658	844251	-	0.0824991	0.859106	0.98071	842766	842776	-10
AT1G03410	844435	847683	-	0.254318	0.00822179	0.0350811	844596	846618	-2022
AT1G03430	847792	849621	+	0.250199	0.00313139	0.0159416	849434	849354	-80
AT1G03440	852150	854297	+	0.0912016	0.726012	0.900026	853984	853995	11
AT1G03457	860760	864372	-	0.403509	0.0430828	0.131634	860788	860803	-15
AT1G03475	868852	871308	-	0.0998911	0.0178473	0.0658768	869050	869057	-7
AT1G03520	877860	880259	-	0.139126	0.564007	0.779555	877869	877865	4
AT1G03530	880383	883599	-	0.150538	0.478378	0.708474	880506	880541	-35
AT1G03560	890154	892492	-	0.162139	0.721673	0.897957	890154	890158	-4
AT1G03590	894237	897718	-	0.168282	0.196705	0.399129	894291	894279	12
AT1G03600	898479	899794	+	0.0526791	4.66074e-05	0.000423786	899649	899537	-112
AT1G03610	900731	903070	+	0.245916	5.07214e-06	5.79559e-05	902914	902900	-14
AT1G03630	907522	909650	+	0.264348	4.26526e-24	3.47652e-22	909361	909338	-23
AT1G03650	910022	911292	-	0.163529	0.799622	0.947599	910169	910165	4
AT1G03680	916771	918064	-	0.0405054	0.0854579	0.22	916908	916844	64
AT1G03687	918284	920592	+	0.109986	0.928204	1	920518	920539	21
AT1G03730	930714	931985	-	0.206667	0.218251	0.429265	930833	930851	-18
AT1G03740	933425	937152	+	0.144822	0.277751	0.502238	937029	937045	16
AT1G03750	937825	941162	+	0.287879	0.485722	0.715621	941189	941139	-50
AT1G03760	941061	943377	-	0.3	0.218306	0.429271	941088	941092	-4
AT1G03820	959789	960916	-	0.16502	0.534098	0.75643	959841	959888	-47
AT1G03830	961683	966790	-	0.24381	0.448969	0.680258	962028	961667	361
AT1G03850	975870	977911	-	0.238602	0.0448236	0.135339	977094	977122	-28
AT1G03860	979306	982002	-	0.0905765	0.210396	0.418738	979341	979329	12
AT1G03870	982380	983544	-	0.0233342	0.941962	1	982542	982532	10
AT1G03900	991105	993126	+	0.0893964	0.196551	0.398978	993092	993093	1
AT1G03910	996075	1000629	+	0.108643	0.578	0.789985	1000401	1000344	-57
AT1G03930	1004687	1008370	+	0.0991736	0.496837	0.725669	1008308	1008282	-26
AT1G03950	1011150	1013365	-	0.184562	0.391322	0.626983	1011232	1011253	-21
AT1G03960	1013642	1017957	+	0.286311	0.131072	0.299276	1017862	1017899	37
AT1G03970	1018099	1019247	+	0.190901	0.157787	0.34167	1019233	1019218	-15
AT1G04000	1027852	1029119	-	0.130418	0.282619	0.508368	1028137	1028151	-14
AT1G04010	1030956	1036264	-	0.461538	0.0869939	0.223049	1033721	1031271	2450
AT1G04020	1036492	1040262	+	0.232143	0.436213	0.66858	1040187	1040157	-30
AT1G04040	1042361	1043887	-	0.126843	0.0441036	0.133838	1042358	1042487	-129
AT1G04070	1050504	1051194	-	0.0804762	0.918002	1	1050694	1050690	4
AT1G04080	1051311	1056827	+	0.171479	0.00135101	0.00786265	1056667	1056678	11
AT1G04100	1059469	1061209	+	0.347594	0.155174	0.338069	1061154	1061180	26
AT1G04110	1061296	1063809	-	0.346154	0.288892	0.515455	1063022	1061296	1726
AT1G04120	1064263	1071080	-	0.23145	0.00245639	0.0129923	1064576	1064752	-176
AT1G04130	1073273	1075568	+	0.263587	0.464175	0.694877	1075446	1075420	-26
AT1G04140	1075542	1080630	-	0.126862	0.0231752	0.0810978	1075610	1075658	-48
AT1G04170	1096881	1099901	+	0.409894	4.3176e-25	3.68946e-23	1099895	1099782	-113
AT1G04180	1104492	1106241	+	0.195046	0.114718	0.271489	1106242	1106096	-146
AT1G04190	1106353	1108725	-	0.124438	0.314284	0.544855	1106480	1106470	10
AT1G04200	1109394	1114155	+	0.252832	0.123527	0.286912	1114053	1114108	55
AT1G04210	1114374	1119739	+	0.0761905	0.890439	0.995081	1119693	1119692	-1
AT1G04220	1119698	1122786	-	0.157692	0.980944	1	1119757	1119779	-22
AT1G04230	1125514	1128788	+	0.23569	0.271377	0.49396	1128062	1128173	111
AT1G04240	1128148	1129689	-	0.0276448	0.995963	1	1128257	1128243	14
AT1G04250	1136077	1138663	+	0.0969822	0.0817779	0.212799	1138584	1138528	-56
AT1G04260	1140277	1141564	-	0.102632	0.431394	0.664139	1140616	1140630	-14
AT1G04270	1141557	1143130	-	0.181386	1.15992e-30	1.48675e-28	1141634	1141747	-113
AT1G04280	1143435	1147091	-	0.0914413	0.467937	0.69874	1143532	1143537	-5
AT1G04290	1147296	1148533	-	0.264021	0.000884305	0.00544351	1147577	1147614	-37
AT1G04300	1148563	1154667	-	0.159254	0.0826818	0.214659	1148649	1148734	-85
AT1G04310	1154739	1157813	-	0.140172	0.500592	0.728653	1154908	1154874	34
AT1G04340	1162904	1164861	-	0.171036	0.130761	0.298822	1163114	1163142	-28
AT1G04350	1164909	1167135	+	0.115589	0.00789685	0.0339407	1166764	1166766	2
AT1G04390	1179309	1183704	-	0.393939	0.00818343	0.0349268	1179351	1179403	-52
AT1G04400	1185511	1188696	-	0.0809799	0.180029	0.375116	1185571	1185558	13
AT1G04410	1188994	1191458	-	0.0544805	0.00121187	0.00716304	1189203	1189197	6
AT1G04420	1191518	1193884	+	0.264645	3.32536e-13	1.16674e-11	1193887	1193866	-21
AT1G04430	1197955	1201579	+	0.153702	0.000140715	0.00111381	1201527	1201427	-100
AT1G04440	1202159	1206009	+	0.169412	0.0224565	0.0791582	1205767	1205779	12
AT1G04480	1215924	1217471	+	0.0983041	0.00024476	0.00180604	1217392	1217387	-5
AT1G04510	1226482	1230947	+	0.243469	1.90389e-05	0.000190677	1230794	1230707	-87
AT1G04520	1231451	1234032	+	0.127755	0.786265	0.939579	1233996	1233978	-18
AT1G04530	1234175	1236206	-	0.275958	5.44992e-08	9.06077e-07	1234258	1234300	-42
AT1G04550	1240293	1242157	+	0.058762	0.950407	1	1242112	1242118	6
AT1G04555	1242505	1244244	+	0.233871	0.31229	0.542429	1244112	1244130	18
AT1G04560	1244946	1246059	+	0.153333	0.73399	0.905959	1246055	1246016	-39
AT1G04570	1246600	1248876	-	0.265734	0.723661	0.898584	1246800	1247575	-775
AT1G04590	1258555	1261470	-	0.0849282	0.91874	1	1258624	1258622	2
AT1G04620	1282162	1286619	-	0.25475	0.159416	0.344214	1282738	1282754	-16
AT1G04630	1289733	1291112	-	0.167619	0.00810111	0.0346686	1289742	1289809	-67
AT1G04635	1291299	1292024	+	0.213158	0.713802	0.893652	1291714	1291923	209
AT1G04640	1292022	1293398	+	0.247847	1.76073e-05	0.000177683	1293347	1293271	-76
AT1G04680	1303466	1307973	-	0.164032	0.00672628	0.0297792	1303675	1303837	-162
AT1G04690	1313442	1315823	+	0.118645	0.00207999	0.0113295	1315641	1315735	94
AT1G04710	1321884	1324840	+	0.162807	0.328466	0.560515	1324781	1324757	-24
AT1G04730	1325098	1331169	-	0.261905	0.697022	0.882136	1325219	1325241	-22
AT1G04750	1331465	1333651	-	0.138629	0.000200247	0.00151414	1331623	1331694	-71
AT1G04770	1336273	1337849	-	0.174615	0.384019	0.619639	1336406	1336410	-4
AT1G04780	1340552	1343793	-	0.150226	0.0959181	0.239328	1340655	1340657	-2
AT1G04790	1344988	1348868	+	0.150104	0.334208	0.566285	1348453	1348410	-43
AT1G04800	1348451	1349478	-	0.111837	0.0218333	0.0774115	1348444	1348457	-13
AT1G04810	1350079	1355466	+	0.0621003	0.941011	1	1355366	1355364	-2
AT1G04820	1356083	1358547	-	0.0631691	0.00671206	0.0297265	1356279	1356228	51
AT1G04830	1358573	1362019	-	0.181941	0.244454	0.461498	1358977	1358958	19
AT1G04850	1365106	1368940	-	0.131444	0.0374382	0.118181	1365123	1365119	4
AT1G04860	1369035	1373103	-	0.15873	0.0822967	0.213957	1369171	1369124	47
AT1G04870	1373233	1375821	-	0.231952	0.00514183	0.023875	1373321	1373344	-23
AT1G04900	1383840	1387895	+	0.152948	0.698215	0.882991	1387897	1387815	-82
AT1G04910	1387870	1391381	-	0.184783	0.0761035	0.201834	1387867	1387893	-26
AT1G04930	1396264	1399122	-	0.222222	0.708768	0.889702	1396302	1396298	4
AT1G04940	1399181	1400830	+	0.21981	3.2443e-06	3.86286e-05	1400744	1400725	-19
AT1G04945	1399173	1403112	+	0.170721	0.000160553	0.00125212	1400771	1400725	-46
AT1G04950	1403084	1407531	-	0.0897436	0.926	1	1403141	1403191	-50
AT1G04960	1407771	1410933	-	0.139817	0.48376	0.713717	1407832	1407902	-70
AT1G04970	1411087	1413627	+	0.157647	0.0515687	0.150364	1413627	1413592	-35
AT1G04980	1413643	1416218	-	0.41088	0.00145068	0.00836011	1413781	1413754	27
AT1G04985	1416341	1419027	-	0.251068	0.000261398	0.00191184	1416341	1416427	-86
AT1G04990	1418611	1421863	-	0.126708	0.969413	1	1419141	1419171	-30
AT1G05000	1425538	1428869	+	0.216312	0.31877	0.549598	1428693	1428551	-142
AT1G05010	1431176	1433010	-	0.00971669	0.999562	1	1431271	1431263	8
AT1G05030	1438047	1441933	-	0.261082	0.0647966	0.178811	1438130	1438138	-8
AT1G05055	1448630	1450901	-	0.18544	0.281876	0.507722	1448798	1448796	2
AT1G05060	1451001	1452872	-	0.195513	0.0299251	0.0990481	1451021	1451059	-38
AT1G05065	1454605	1455322	-	0.141304	0.973332	1	1454761	1454783	-22
AT1G05070	1457006	1458802	-	0.413642	2.08301e-10	5.1569e-09	1457034	1457077	-43
AT1G05087	1463107	1464173	+	0.406233	5.54875e-05	0.000496017	1465796	1465738	-58
AT1G05090	1464238	1465875	+	0.321259	3.05107e-05	0.000289688	1465796	1465738	-58
AT1G05120	1471322	1476289	-	0.101974	0.937101	1	1471488	1471454	34
AT1G05140	1482545	1484059	+	0.165455	0.000480514	0.00325407	1484077	1484047	-30
AT1G05150	1484066	1486960	-	0.163571	0.0539858	0.155528	1484098	1484053	45
AT1G05160	1487377	1491005	-	0.229524	0.369999	0.604582	1487393	1487400	-7
AT1G05170	1490973	1494248	-	0.150696	0.339334	0.571635	1491128	1491155	-27
AT1G05180	1498113	1501953	-	0.168313	0.0852456	0.219665	1498224	1498267	-43
AT1G05190	1502250	1503853	-	0.530021	4.53922e-221	1.80366e-217	1502378	1502413	-35
AT1G05200	1504940	1509152	+	0.0977421	0.701165	0.884782	1509148	1509151	3
AT1G05205	1509102	1510341	-	0.0942249	0.899922	0.999355	1509242	1509214	28
AT1G05210	1510403	1511683	+	0.315344	0.0763253	0.20222	1511683	1511631	-52
AT1G05230	1512895	1518900	-	0.205784	0.32179	0.552718	1512907	1512905	2
AT1G05260	1529766	1531484	+	0.125506	0.924154	1	1531432	1531420	-12
AT1G05270	1531640	1534767	-	0.129963	0.538871	0.759445	1531649	1531640	9
AT1G05300	1544926	1547849	-	0.24537	0.376852	0.611317	1545182	1545218	-36
AT1G05310	1550502	1552587	-	0.166667	0.903658	1	1550582	1550578	4
AT1G05320	1553567	1557848	+	0.205844	0.104226	0.253803	1557732	1557695	-37
AT1G05340	1558777	1559917	-	0.0927649	0.731176	0.903912	1558843	1558887	-44
AT1G05350	1560677	1564409	-	0.129447	0.456528	0.688038	1560738	1560751	-13
AT1G05360	1564490	1567508	+	0.465278	1.77862e-05	0.000179034	1567459	1567387	-72
AT1G05380	1576821	1582672	+	0.139813	0.226384	0.439592	1582610	1582575	-35
AT1G05385	1582670	1583760	-	0.151983	0.0770509	0.203531	1582663	1582690	-27
AT1G05410	1585370	1587794	-	0.162088	0.329954	0.562063	1585373	1585400	-27
AT1G05430	1594052	1595923	-	0.201916	0.0083959	0.0357245	1594058	1594081	-23
AT1G05460	1601147	1605034	-	0.358852	0.111588	0.265945	1601284	1601193	91
AT1G05470	1607201	1611840	-	0.249603	0.406861	0.641533	1607304	1607353	-49
AT1G05500	1624918	1629289	+	0.0498986	0.98802	1	1629183	1629216	33
AT1G05520	1630848	1636018	-	0.277778	6.75381e-05	0.000590782	1630906	1630858	48
AT1G05540	1639222	1640879	+	0.2	0.8899	0.99487	1640829	1640809	-20
AT1G05560	1645299	1647435	-	0.107512	0.49398	0.723024	1645517	1646008	-491
AT1G05570	1647574	1659611	-	0.0808081	0.991809	1	1647734	1647712	22
AT1G05590	1669349	1671902	+	0.295614	0.00240495	0.0127797	1671868	1671858	-10
AT1G05600	1671915	1673923	+	0.157736	0.407577	0.642088	1673794	1673809	15
AT1G05620	1678880	1681710	+	0.141204	0.657792	0.853639	1681707	1681702	-5
AT1G05630	1682223	1687363	+	0.158571	0.864135	0.982568	1687399	1687391	-8
AT1G05670	1697540	1701065	-	0.357143	0.236161	0.451581	1697591	1697540	51
AT1G05680	1703001	1704838	-	0.14375	0.826493	0.963919	1703117	1703108	9
AT1G05690	1706735	1709360	+	0.217391	0.593047	0.802408	1709276	1709328	52
AT1G05710	1714817	1717290	+	0.254079	0.262849	0.483588	1717276	1717176	-100
AT1G05720	1717388	1718909	-	0.213793	0.00214852	0.0116231	1717469	1717446	23
AT1G05750	1721508	1724734	+	0.20614	0.706249	0.888204	1722076	1723721	1645
AT1G05780	1726557	1728520	+	0.332817	0.0118878	0.0475332	1728401	1728364	-37
AT1G05785	1730241	1732657	+	0.1278	0.891102	0.995514	1732604	1732595	-9
AT1G05790	1732801	1737583	+	0.29207	0.0206978	0.074287	1737437	1737464	27
AT1G05805	1744443	1747734	+	0.146053	0.180627	0.375967	1747687	1747680	-7
AT1G05810	1748258	1749526	+	0.124069	0.748695	0.914795	1749452	1749512	60
AT1G05830	1754129	1761909	+	0.15614	0.441204	0.673631	1761802	1761811	9
AT1G05835	1762144	1762814	+	0.103741	0.239036	0.455124	1762784	1762782	-2
AT1G05840	1762733	1766283	-	0.0815217	0.809213	0.953692	1762770	1762751	19
AT1G05850	1766502	1768837	-	0.1258	1.47902e-16	7.25541e-15	1766644	1766600	44
AT1G05860	1768985	1771286	+	0.202918	0.260387	0.480952	1771118	1770654	-464
AT1G05870	1771384	1773385	-	0.143868	0.0304098	0.100297	1771451	1772232	-781
AT1G05890	1779255	1784675	+	0.0922824	0.327929	0.56002	1784450	1784466	16
AT1G05900	1786848	1789737	+	0.0938759	0.90133	0.999642	1789674	1789660	-14
AT1G05910	1790215	1796715	+	0.104396	0.855983	0.978753	1796709	1796722	13
AT1G05940	1801109	1804000	-	0.0566223	0.974817	1	1801198	1801180	18
AT1G05950	1804400	1807670	-	0.19697	0.96096	1	1804407	1804456	-49
AT1G05960	1807959	1815568	-	0.130769	0.249267	0.467695	1808304	1807967	337
AT1G05970	1815824	1817336	-	0.177436	0.490275	0.719136	1816128	1816062	66
AT1G06000	1820307	1821894	-	0.171278	0.165814	0.354176	1820412	1820288	124
AT1G06010	1822582	1824236	+	0.146825	0.379147	0.614037	1823934	1823938	4
AT1G06040	1828339	1829983	-	0.0618342	0.000689978	0.00441664	1828441	1828502	-61
AT1G06050	1830470	1832555	-	0.135714	0.875273	0.988189	1830521	1830608	-87
AT1G06060	1832940	1834861	+	0.286831	5.74611e-06	6.48641e-05	1834853	1834794	-59
AT1G06070	1834828	1837758	-	0.240982	0.0021552	0.0116394	1834865	1834900	-35
AT1G06080	1843462	1846311	+	0.0511133	0.181691	0.377638	1846274	1846302	28
AT1G06110	1853058	1855378	-	0.314286	1.26674e-06	1.63731e-05	1853099	1853130	-31
AT1G06130	1857756	1860938	-	0.169828	0.0421906	0.12948	1857906	1857785	121
AT1G06150	1868988	1873730	-	0.0632743	0.983517	1	1869003	1869063	-60
AT1G06180	1889361	1891276	+	0.15415	0.370052	0.604606	1891155	1891160	5
AT1G06190	1892230	1894194	-	0.0909651	0.14811	0.327026	1892267	1892286	-19
AT1G06200	1894288	1897027	-	0.0636222	0.759949	0.922103	1894327	1894410	-83
AT1G06210	1897128	1899237	+	0.172411	0.0605515	0.169557	1899207	1899114	-93
AT1G06220	1899950	1904897	+	0.129829	0.0773877	0.204217	1904736	1904735	-1
AT1G06230	1906962	1911056	+	0.169956	0.0105725	0.0430647	1910850	1910799	-51
AT1G06240	1911094	1913295	+	0.136364	0.848041	0.97435	1913058	1913197	139
AT1G06270	1917990	1919760	-	0.263636	0.498253	0.726936	1918096	1918155	-59
AT1G06290	1922207	1926278	+	0.198258	0.000514393	0.00344823	1926238	1926111	-127
AT1G06350	1935226	1936841	-	0.26455	0.328156	0.560168	1935386	1936227	-841
AT1G06360	1938861	1940496	-	0.0463445	0.907822	1	1938930	1938963	-33
AT1G06380	1944992	1946303	+	0.216756	0.0362619	0.115154	1946075	1945905	-170
AT1G06390	1946745	1950860	+	0.230509	7.70213e-07	1.03656e-05	1950732	1950718	-14
AT1G06400	1950595	1952880	-	0.390767	2.85882e-15	1.23473e-13	1950915	1950977	-62
AT1G06410	1954673	1958866	+	0.223673	1.02724e-07	1.62135e-06	1958715	1958653	-62
AT1G06430	1960030	1963189	-	0.09766	0.00080499	0.00501363	1960088	1960079	9
AT1G06450	1965839	1967219	+	0.3125	0.252384	0.471318	1967195	1967214	19
AT1G06460	1967086	1969656	-	0.0551859	0.549049	0.768455	1967094	1967116	-22
AT1G06470	1969657	1974526	+	0.290123	0.00222428	0.0119596	1973759	1973697	-62
AT1G06500	1989478	1990730	+	0.272996	0.0222626	0.0785617	1990724	1990722	-2
AT1G06510	1992228	1993841	+	0.16183	0.0494343	0.145961	1993787	1993841	54
AT1G06515	1990633	1992228	-	0.379467	6.58911e-11	1.72817e-09	1990700	1990731	-31
AT1G06530	2001381	2002802	+	0.156034	0.049545	0.146125	2002706	2002687	-19
AT1G06550	2003626	2007212	-	0.190228	0.0770476	0.203531	2003651	2003690	-39
AT1G06560	2007614	2012006	+	0.175	0.465256	0.695914	2011975	2011981	6
AT1G06570	2011884	2013545	-	0.113126	0.00554943	0.025404	2011887	2011938	-51
AT1G06590	2016305	2024749	-	0.223039	0.647171	0.846247	2016309	2016308	1
AT1G06620	2025543	2027413	+	0.320044	0.0878917	0.22459	2027263	2027225	-38
AT1G06630	2027605	2031388	+	0.108416	0.744059	0.912295	2029555	2029588	33
AT1G06640	2031625	2034112	+	0.11103	0.084344	0.217907	2033922	2033937	15
AT1G06645	2034155	2035824	+	0.169231	0.394345	0.629668	2035756	2035617	-139
AT1G06650	2035717	2037366	+	0.197471	0.00022234	0.00166221	2037380	2037281	-99
AT1G06670	2040409	2047655	+	0.157731	0.20814	0.415808	2047525	2047573	48
AT1G06680	2047633	2049439	+	0.130371	5.98425e-186	1.35877e-182	2049368	2049277	-91
AT1G06690	2049399	2052170	-	0.117324	0.0395189	0.122991	2049623	2049622	1
AT1G06700	2052369	2055548	-	0.173745	0.000207217	0.00156312	2052595	2052653	-58
AT1G06720	2060443	2067483	-	0.198374	0.114865	0.271675	2060536	2060509	27
AT1G06730	2067508	2070455	+	0.203794	0.333947	0.565978	2070327	2070448	121
AT1G06740	2070736	2073374	+	0.233333	0.677908	0.868785	2073495	2073502	7
AT1G06760	2076503	2077767	-	0.0370643	0.446898	0.678792	2076531	2076546	-15
AT1G06770	2078879	2082097	-	0.113553	0.943976	1	2078996	2078911	85
AT1G06780	2083310	2087141	+	0.244828	0.0484452	0.143762	2086959	2086979	20
AT1G06790	2087181	2089786	+	0.24359	0.08718	0.223418	2089502	2089431	-71
AT1G06800	2089416	2091686	-	0.351495	0.0123435	0.0490838	2089407	2089453	-46
AT1G06820	2092945	2096784	-	0.120068	0.408243	0.642882	2092960	2092968	-8
AT1G06830	2097105	2097655	+	0.137143	0.950465	1	2097601	2097563	-38
AT1G06840	2097746	2103507	-	0.169158	0.394101	0.629468	2097692	2097708	-16
AT1G06850	2105047	2106749	+	0.127623	0.860209	0.980887	2106742	2106739	-3
AT1G06870	2108511	2110986	+	0.376049	0.000187446	0.00142959	2110936	2110901	-35
AT1G06890	2111322	2114686	-	0.124965	0.15807	0.341994	2111655	2111646	9
AT1G06900	2114764	2120745	-	0.188624	0.0856535	0.220359	2114967	2114941	26
AT1G06910	2120990	2123801	+	0.263158	0.39628	0.631363	2123734	2123697	-37
AT1G06950	2130052	2135703	-	0.252305	2.62476e-13	9.3748e-12	2130156	2130227	-71
AT1G06960	2135809	2137838	+	0.251254	0.00490923	0.0230169	2137727	2137708	-19
AT1G06980	2142938	2143977	-	0.322981	0.162948	0.350082	2143026	2143174	-148
AT1G07000	2150157	2152541	-	0.239796	0.222758	0.434953	2150209	2150186	23
AT1G07010	2152797	2155269	+	0.129813	0.0274274	0.0924461	2155223	2155058	-165
AT1G07020	2155212	2156153	-	0.129469	0.501008	0.728747	2155182	2155215	-33
AT1G07030	2158412	2160818	-	0.173697	0.0632667	0.175429	2158418	2158459	-41
AT1G07040	2160918	2163387	-	0.165091	0.0333209	0.107775	2161094	2161098	-4
AT1G07070	2168560	2169957	+	0.362589	3.50477e-07	5.02298e-06	2169836	2169791	-45
AT1G07080	2169976	2172194	+	0.268681	6.88593e-19	3.97982e-17	2172029	2172015	-14
AT1G07090	2173951	2174894	-	0.0433608	0.993464	1	2174080	2174079	1
AT1G07110	2178021	2184193	-	0.141752	0.00500245	0.0233311	2178122	2178175	-53
AT1G07130	2187775	2188733	+	0.322222	0.184042	0.380831	2188736	2188583	-153
AT1G07135	2189876	2190784	-	0.150183	0.960518	1	2189934	2190016	-82
AT1G07140	2191678	2193836	-	0.126782	0.000166512	0.00128974	2192017	2192006	11
AT1G07170	2199996	2201272	+	0.159655	0.039137	0.122198	2201160	2201143	-17
AT1G07180	2204103	2207099	+	0.0823517	0.124648	0.288849	2206927	2206906	-21
AT1G07200	2208476	2212718	-	0.200904	0.367795	0.601997	2208914	2208802	112
AT1G07210	2215215	2216982	+	0.0756226	0.803234	0.950179	2216982	2216980	-2
AT1G07220	2216924	2219649	-	0.146953	0.834814	0.96754	2218675	2216960	1715
AT1G07230	2220180	2223018	-	0.049825	0.968035	1	2220218	2220414	-196
AT1G07240	2223624	2225524	+	0.303828	0.00528501	0.024447	2225427	2225401	-26
AT1G07250	2225758	2227608	+	0.0919248	0.52636	0.750311	2227581	2227566	-15
AT1G07280	2238016	2241471	+	0.0939567	0.19761	0.400483	2241122	2241063	-59
AT1G07310	2247111	2248961	-	0.129013	0.0109456	0.0443914	2247506	2247540	-34
AT1G07320	2248966	2250529	+	0.186357	1.68087e-20	1.07292e-18	2250423	2250368	-55
AT1G07350	2257383	2260187	-	0.0531496	0.988475	1	2257523	2257519	4
AT1G07360	2260316	2262923	-	0.178491	0.00517962	0.0240154	2260390	2260479	-89
AT1G07370	2263036	2264553	+	0.0888773	0.993433	1	2264479	2264537	58
AT1G07380	2264633	2269121	-	0.134394	0.903783	1	2264676	2264666	10
AT1G07390	2269621	2274901	+	0.268889	0.377372	0.611848	2274800	2274806	6
AT1G07400	2274925	2275783	+	0.256944	0.563187	0.779241	2275756	2275752	-4
AT1G07410	2276029	2277524	+	0.230769	0.812421	0.955312	2277390	2277399	9
AT1G07420	2277554	2280502	+	0.12337	0.259733	0.480245	2280256	2280290	34
AT1G07440	2286184	2287791	-	0.195556	0.0764231	0.202293	2286314	2286306	8
AT1G07450	2287925	2289336	-	0.176471	0.94467	1	2287940	2287951	-11
AT1G07470	2291368	2294558	+	0.191124	0.0357231	0.113878	2294530	2294553	23
AT1G07480	2296022	2299544	-	0.139167	0.277742	0.502238	2296471	2296529	-58
AT1G07490	2301379	2302021	-	0.175	0.953649	1	2301380	2301315	65
AT1G07510	2304434	2312399	+	0.0840909	0.916797	1	2309551	2309537	-14
AT1G07520	2309533	2312385	-	0.211905	0.360923	0.594643	2309535	2309560	-25
AT1G07530	2313580	2316507	-	0.159642	0.155605	0.338515	2313580	2313591	-11
AT1G07570	2331135	2333767	-	0.225814	0.014802	0.0567992	2331146	2331224	-78
AT1G07590	2336476	2339391	-	0.0354432	1.74108e-06	2.198e-05	2338648	2338660	-12
AT1G07600	2338903	2339321	-	0.0346074	6.04454e-06	6.7704e-05	2338648	2338678	-30
AT1G07610	2341446	2342148	+	0.0395879	0.908152	1	2342062	2342055	-7
AT1G07615	2342197	2344314	-	0.140787	0.971093	1	2342200	2342159	41
AT1G07630	2348914	2351799	+	0.0846154	0.981381	1	2351565	2351553	-12
AT1G07640	2353030	2356413	-	0.043883	0.998371	1	2354356	2354400	-44
AT1G07650	2359110	2366736	-	0.159879	0.189928	0.389612	2359754	2359742	12
AT1G07660	2368832	2369735	+	0.0446766	0.948762	1	2369727	2369732	5
AT1G07670	2370019	2374607	-	0.167546	0.0517072	0.150674	2370178	2370182	-4
AT1G07700	2379594	2381390	+	0.382704	4.41981e-14	1.73453e-12	2381349	2381266	-83
AT1G07705	2381554	2386157	+	0.285208	0.00488519	0.0229245	2386032	2385985	-47
AT1G07720	2390530	2392628	-	0.067507	0.900143	0.999355	2390835	2390894	-59
AT1G07730	2397526	2398696	-	0.22381	0.809929	0.954192	2397749	2397927	-178
AT1G07740	2397441	2400508	-	0.164706	0.969336	1	2398843	2399909	-1066
AT1G07745	2400588	2402942	-	0.264209	0.298047	0.52641	2400613	2400653	-40
AT1G07750	2403991	2406049	-	0.0975474	0.561708	0.778137	2404108	2404104	4
AT1G07770	2407410	2409791	-	0.0755896	1.12645e-06	1.47721e-05	2408264	2408286	-22
AT1G07780	2409864	2412777	-	0.271477	0.000112533	0.00091912	2410129	2410224	-95
AT1G07790	2412937	2413790	+	0.129512	0.0333398	0.107792	2413709	2413671	-38
AT1G07810	2416177	2420829	+	0.0874212	0.718146	0.896104	2420757	2420673	-84
AT1G07820	2421088	2422066	-	0.0572923	0.341479	0.573985	2421220	2421221	-1
AT1G07830	2422125	2423803	+	0.14742	0.164539	0.352402	2423639	2423605	-34
AT1G07840	2424044	2426728	+	0.143836	0.367428	0.601617	2426555	2426576	21
AT1G07870	2428772	2432091	-	0.32	0.123613	0.286986	2429697	2429736	-39
AT1G07890	2437280	2439665	+	0.0203833	0.802399	0.949685	2439649	2439647	-2
AT1G07902	2443917	2445140	+	0.398396	0.0201944	0.0728816	2445198	2444294	-904
AT1G07910	2445436	2454645	+	0.209302	0.367211	0.601324	2454500	2454498	-2
AT1G07920	2454770	2457321	+	0.0427597	2.2842e-05	0.000224318	2457158	2457259	101
AT1G07930	2458183	2460817	+	0.160194	1.57822e-38	3.09682e-36	2460692	2460674	-18
AT1G07940	2462948	2465545	-	0.0992435	8.61726e-26	8.00952e-24	2463086	2463112	-26
AT1G07950	2465728	2467165	-	0.125187	0.305695	0.535279	2465822	2465783	39
AT1G07960	2467144	2469316	+	0.135348	0.185372	0.382588	2469141	2469013	-128
AT1G07970	2469217	2472806	-	0.147049	0.546272	0.766054	2469312	2469306	6
AT1G07980	2473164	2475128	-	0.317672	0.00719737	0.0314704	2473282	2473251	31
AT1G07985	2475225	2476167	+	0.18	0.825856	0.963529	2476007	2476153	146
AT1G07990	2476952	2483196	+	0.115615	0.653927	0.851098	2483101	2483110	9
AT1G08000	2483239	2485726	-	0.219534	0.354941	0.589122	2483275	2483245	30
AT1G08010	2485847	2488085	-	0.0697648	0.970528	1	2485951	2485966	-15
AT1G08030	2489408	2493327	-	0.281409	0.00438028	0.0209573	2489517	2489409	108
AT1G08040	2495308	2498764	-	0.166122	0.346707	0.579936	2495347	2495382	-35
AT1G08060	2501703	2511084	-	0.338896	0.0159695	0.0603757	2501732	2501841	-109
AT1G08110	2535250	2537932	+	0.262349	5.23062e-18	2.85689e-16	2537922	2537828	-94
AT1G08125	2539613	2542362	-	0.187302	0.285163	0.511728	2539639	2539649	-10
AT1G08130	2542662	2547946	-	0.185996	0.0498468	0.146757	2542759	2542754	5
AT1G08160	2559412	2560432	-	0.198606	0.593946	0.803488	2559587	2559502	85
AT1G08165	2561448	2562316	-	0.5	0.0137169	0.0533831	2561595	2561678	-83
AT1G08180	2564360	2565318	-	0.090947	0.982962	1	2564639	2564652	-13
AT1G08190	2567419	2573448	+	0.284156	5.29363e-06	6.01407e-05	2573351	2573373	22
AT1G08200	2573817	2576844	-	0.128456	5.19877e-07	7.21024e-06	2573952	2573997	-45
AT1G08210	2576983	2580754	-	0.181647	0.129048	0.295803	2577042	2577039	3
AT1G08220	2581021	2583390	-	0.553571	3.92153e-05	0.000363433	2581055	2581069	-14
AT1G08230	2583593	2586969	-	0.208006	0.0141531	0.0547723	2586126	2586143	-17
AT1G08250	2588775	2590609	-	0.0594156	0.994661	1	2588940	2588923	17
AT1G08260	2588853	2606892	+	0.283088	0.453918	0.685731	2606949	2600174	-6775
AT1G08280	2607876	2609971	+	0.300818	0.0109571	0.0444039	2609854	2609823	-31
AT1G08300	2614773	2618823	+	0.151579	0.948667	1	2618444	2618429	-15
AT1G08315	2620334	2621545	-	0.348637	0.00569257	0.0259174	2620339	2620442	-103
AT1G08320	2621859	2628594	-	0.232143	0.609519	0.815738	2621948	2622006	-58
AT1G08350	2632809	2635866	-	0.211765	0.425765	0.659627	2632854	2632815	39
AT1G08360	2635938	2638004	+	0.195516	8.00179e-32	1.10592e-29	2637870	2637853	-17
AT1G08370	2638036	2640663	+	0.161021	0.0368108	0.116455	2640540	2640499	-41
AT1G08380	2640802	2641934	-	0.131324	9.585e-175	1.9043e-171	2640897	2640924	-27
AT1G08390	2642071	2643285	+	0.189317	0.478215	0.708298	2643196	2643251	55
AT1G08400	2643018	2646048	-	0.106522	0.999354	1	2643333	2643325	8
AT1G08410	2646143	2649440	+	0.218084	0.0959168	0.239328	2649373	2649264	-109
AT1G08420	2649458	2657120	+	0.0847703	0.673389	0.864807	2657061	2657062	1
AT1G08450	2667797	2671957	-	0.160317	0.0132002	0.0517396	2667877	2667887	-10
AT1G08460	2672197	2674721	+	0.205525	0.0265201	0.0901819	2674599	2674582	-17
AT1G08465	2675812	2679824	+	0.131969	0.339266	0.571635	2679674	2679546	-128
AT1G08470	2682057	2684171	-	0.290909	0.00958468	0.0398167	2682132	2682144	-12
AT1G08480	2684175	2685702	+	0.298203	9.86793e-12	2.91526e-10	2685605	2685581	-24
AT1G08490	2685658	2688658	-	0.137232	0.023489	0.0821057	2685656	2685796	-140
AT1G08500	2688879	2690250	+	0.135714	0.985667	1	2689966	2689908	-58
AT1G08510	2691061	2694547	-	0.218819	3.56071e-07	5.09396e-06	2691199	2691345	-146
AT1G08520	2696380	2701022	+	0.0462312	0.609222	0.815477	2700928	2700925	-3
AT1G08530	2700980	2703162	+	0.133867	0.822306	0.961739	2703153	2703073	-80
AT1G08540	2703294	2706860	+	0.0897293	0.147819	0.326537	2706839	2706764	-75
AT1G08550	2706867	2709988	+	0.190094	0.058732	0.165894	2709458	2709442	-16
AT1G08560	2709524	2711000	-	0.112121	0.822514	0.961889	2709634	2709632	2
AT1G08570	2712693	2714833	+	0.0844642	0.046264	0.138837	2714717	2714718	1
AT1G08580	2714993	2716532	-	0.123162	0.149187	0.328554	2715096	2715151	-55
AT1G08600	2723676	2733613	+	0.108974	0.876589	0.988667	2733612	2733623	11
AT1G08610	2733595	2735819	-	0.49496	0.000496937	0.003351	2733599	2733681	-82
AT1G08620	2736655	2743881	+	0.114286	0.791642	0.942781	2743697	2743731	34
AT1G08630	2743760	2747967	-	0.141026	0.734464	0.90608	2743840	2743846	-6
AT1G08640	2748360	2751620	-	0.134085	0.00288577	0.0148622	2748424	2748535	-111
AT1G08650	2752123	2753809	+	0.063851	0.975485	1	2753691	2753702	11
AT1G08660	2756903	2759889	-	0.392222	5.23567e-07	7.25508e-06	2756992	2757061	-69
AT1G08680	2762583	2768967	+	0.17691	0.0338381	0.109003	2768603	2768624	21
AT1G08700	2769614	2771477	-	0.0524073	0.985998	1	2769717	2769784	-67
AT1G08710	2771619	2773531	+	0.115903	0.923993	1	2773448	2773466	18
AT1G08720	2773940	2779308	+	0.252451	0.0712582	0.191309	2779271	2779241	-30
AT1G08750	2801041	2804711	+	0.178723	0.172871	0.364742	2804515	2804505	-10
AT1G08760	2805043	2808623	+	0.384249	0.00217608	0.0117243	2808604	2808533	-71
AT1G08770	2808759	2809775	+	0.18716	0.00723858	0.0316015	2809765	2809727	-38
AT1G08780	2809777	2811313	-	0.12205	0.39414	0.629468	2809837	2809811	26
AT1G08800	2812817	2818071	-	0.182311	0.3558	0.58987	2813074	2813086	-12
AT1G08810	2819064	2820478	-	0.162727	0.527208	0.75097	2819185	2819063	122
AT1G08820	2821353	2825481	-	0.0770609	0.688773	0.876463	2821561	2821558	3
AT1G08830	2827059	2829315	+	0.0802559	0.106529	0.25783	2829248	2829260	12
AT1G08845	2838788	2841134	+	0.202703	0.368244	0.602404	2841011	2841016	5
AT1G08880	2846893	2848100	-	0.0562425	0.361652	0.595472	2846936	2846950	-14
AT1G08890	2848148	2852270	+	0.202489	0.157207	0.341019	2852244	2852224	-20
AT1G08900	2852362	2855941	+	0.0931707	0.869599	0.985177	2855732	2855692	-40
AT1G08910	2856161	2861170	+	0.290516	0.0540835	0.155782	2861049	2861155	106
AT1G08920	2867202	2870745	+	0.154842	0.66073	0.85574	2870591	2870485	-106
AT1G08930	2873299	2877270	+	0.0860711	0.111586	0.265945	2877132	2877203	71
AT1G08940	2877429	2879169	+	0.315217	0.0686649	0.18644	2879162	2879124	-38
AT1G08960	2879505	2882234	+	0.21285	0.184232	0.380927	2882229	2882232	3
AT1G08970	2882490	2884342	+	0.124289	0.0889422	0.226546	2883999	2884228	229
AT1G08980	2884350	2886621	+	0.222425	0.00031818	0.00226778	2886572	2886615	43
AT1G09010	2895165	2899446	-	0.152093	0.027265	0.0920065	2895175	2895186	-11
AT1G09020	2899775	2904862	-	0.145239	0.109614	0.262737	2899916	2899963	-47
AT1G09040	2911249	2915406	+	0.229167	0.753642	0.917602	2915359	2915374	15
AT1G09050	2916967	2921111	+	0.171429	0.937934	1	2921126	2921105	-21
AT1G09060	2921063	2925826	-	0.122826	0.511548	0.738826	2921105	2921100	5
AT1G09070	2927501	2929107	+	0.059063	0.203933	0.40966	2928939	2928936	-3
AT1G09100	2936527	2939363	-	0.146493	0.287097	0.513462	2936559	2936549	10
AT1G09130	2939567	2942345	-	0.186031	2.07049e-10	5.13392e-09	2939641	2939679	-38
AT1G09140	2942537	2945976	-	0.112028	0.169279	0.359513	2942566	2942631	-65
AT1G09150	2946029	2949159	+	0.140873	0.0176806	0.0654197	2949129	2949115	-14
AT1G09160	2952596	2955745	-	0.143375	0.131763	0.300625	2952919	2952870	49
AT1G09180	2965022	2965972	+	0.442857	0.00280991	0.0145097	2966110	2966048	-62
AT1G09190	2966119	2967733	-	0.45	0.0946342	0.23713	2966038	2966114	-76
AT1G09195	2967939	2971568	-	0.357143	0.211956	0.42117	2967988	2967954	34
AT1G09200	2971570	2972334	-	0.0623596	0.342539	0.575387	2971625	2971629	-4
AT1G09210	2972637	2977002	-	0.101126	0.0200309	0.0724222	2973054	2973032	22
AT1G09230	2979510	2982713	-	0.0830978	0.982165	1	2979499	2979537	-38
AT1G09240	2984828	2986231	+	0.291209	0.0517897	0.150815	2986129	2986089	-40
AT1G09250	2989140	2990427	+	0.0636935	0.71114	0.891744	2990272	2990267	-5
AT1G09270	2994330	2998222	+	0.108728	0.0898187	0.228164	2998130	2998075	-55
AT1G09280	2998099	3001362	-	0.144259	0.401378	0.635991	2998119	2998167	-48
AT1G09290	3001438	3003762	-	0.357298	0.00169723	0.00952536	3001515	3001577	-62
AT1G09300	3003494	3008381	+	0.187882	0.433981	0.666312	3008210	3008232	22
AT1G09310	3008909	3009898	+	0.0213357	0.303096	0.532423	3009821	3009820	-1
AT1G09320	3009889	3012407	-	0.291667	0.0877068	0.224298	3010096	3010113	-17
AT1G09330	3012738	3015255	-	0.095895	0.314693	0.545088	3012768	3012825	-57
AT1G09340	3015236	3018542	+	0.184245	1.227e-52	4.14935e-50	3018188	3018116	-72
AT1G09390	3031045	3033582	+	0.394914	0.0001689	0.00130696	3033587	3033535	-52
AT1G09415	3037753	3038408	-	0.191944	0.0426059	0.130377	3037785	3037843	-58
AT1G09420	3038461	3041873	-	0.25641	0.375051	0.609079	3038486	3038506	-20
AT1G09430	3041995	3045541	+	0.0795567	0.188779	0.387905	3045206	3045232	26
AT1G09440	3045258	3048006	-	0.205128	0.658985	0.854595	3045261	3045248	13
AT1G09460	3053697	3055360	+	0.133036	0.908655	1	3055267	3055389	122
AT1G09470	3055230	3057543	-	0.25641	0.740016	0.909794	3055270	3055315	-45
AT1G09480	3057974	3060757	+	0.214286	0.793764	0.944247	3060731	3060744	13
AT1G09490	3063935	3065949	+	0.163633	0.0215851	0.0767158	3065894	3065897	3
AT1G09500	3066673	3068796	+	0.154717	0.17526	0.367971	3068577	3068553	-24
AT1G09520	3070914	3072074	-	0.179924	0.0200366	0.0724222	3071062	3070943	119
AT1G09530	3075767	3079654	+	0.133924	0.45371	0.685547	3079462	3079445	-17
AT1G09560	3093643	3094954	+	0.139751	0.00481367	0.0226491	3094826	3094760	-66
AT1G09570	3095159	3100819	-	0.17809	6.66803e-14	2.57237e-12	3095327	3095376	-49
AT1G09575	3101148	3103677	-	0.312963	0.17116	0.362142	3101648	3101680	-32
AT1G09580	3104491	3106366	+	0.392045	0.00328449	0.0166024	3106256	3106283	27
AT1G09590	3106366	3107801	+	0.181784	4.76736e-14	1.86632e-12	3107754	3107679	-75
AT1G09620	3112777	3116699	-	0.430536	2.82899e-39	5.76461e-37	3112862	3112887	-25
AT1G09630	3118154	3119815	-	0.383815	5.79756e-06	6.53985e-05	3118202	3118217	-15
AT1G09640	3119738	3122542	+	0.0738618	0.00266904	0.0139215	3122431	3122497	66
AT1G09645	3122925	3124667	+	0.147189	0.0981492	0.243139	3124566	3124446	-120
AT1G09660	3127761	3131094	-	0.134091	0.411791	0.646742	3127777	3127807	-30
AT1G09690	3136187	3137684	-	0.181893	2.33323e-30	2.92003e-28	3136272	3136300	-28
AT1G09700	3137648	3140353	-	0.204836	0.615906	0.821312	3137762	3137825	-63
AT1G09710	3140861	3144381	+	0.231951	0.456632	0.688131	3144354	3144357	3
AT1G09730	3147636	3154404	-	0.390575	1.01844e-05	0.000108638	3147664	3147792	-128
AT1G09740	3154389	3156376	+	0.209308	0.0158583	0.0600554	3156252	3156235	-17
AT1G09750	3157500	3159148	+	0.0354232	0.967194	1	3159117	3159136	19
AT1G09760	3159124	3161692	-	0.190871	0.000249473	0.00183741	3159135	3159278	-143
AT1G09770	3161831	3165616	+	0.195851	2.70733e-05	0.000260317	3165358	3165281	-77
AT1G09780	3165369	3167924	-	0.0360173	0.978179	1	3165381	3165387	-6
AT1G09795	3173533	3176910	+	0.0495868	0.920895	1	3176870	3176846	-24
AT1G09800	3176882	3180734	-	0.155556	0.486732	0.716374	3180531	3176926	3605
AT1G09810	3180925	3184224	-	0.0936626	0.984519	1	3180961	3180950	11
AT1G09815	3189300	3190242	+	0.110772	0.286812	0.513297	3190239	3190222	-17
AT1G09820	3190253	3192488	-	0.239943	0.385065	0.620461	3190231	3190271	-40
AT1G09830	3192567	3195044	-	0.123676	0.446403	0.678325	3192696	3192688	8
AT1G09840	3195718	3200403	-	0.316247	4.08008e-05	0.00037659	3195866	3195929	-63
AT1G09850	3201684	3204150	+	0.208275	0.0454181	0.136848	3204116	3204065	-51
AT1G09870	3205578	3208714	+	0.12166	0.430001	0.663407	3208627	3208592	-35
AT1G09900	3218132	3219929	+	0.0891189	0.78239	0.93735	3220090	3220093	3
AT1G09910	3220034	3224541	-	0.300236	0.0166167	0.0622746	3220072	3220084	-12
AT1G09920	3224683	3227083	-	0.050961	0.999176	1	3224684	3224683	1
AT1G09940	3236907	3239554	-	0.130562	0.671332	0.863596	3237014	3237013	1
AT1G09960	3243985	3247216	+	0.13986	0.994183	1	3247220	3247161	-59
AT1G09970	3252097	3255782	+	0.0986022	0.12993	0.297277	3255675	3255640	-35
AT1G09980	3256188	3261741	-	0.128571	0.342997	0.575974	3256334	3256389	-55
AT1G09995	3262221	3263642	-	0.152083	0.744541	0.91232	3262559	3262504	55
AT1G10020	3269538	3272110	-	0.149956	0.450308	0.681702	3269614	3269640	-26
AT1G10030	3273752	3275953	+	0.262957	0.00342535	0.0171797	3275841	3275811	-30
AT1G10050	3278791	3283631	+	0.229167	0.811504	0.9551	3283467	3283477	10
AT1G10060	3284072	3287292	+	0.094794	0.620442	0.825006	3287091	3287078	-13
AT1G10070	3288086	3290471	+	0.136177	0.148122	0.327026	3290358	3290352	-6
AT1G10090	3290310	3296198	-	0.259781	0.00482942	0.0226963	3290265	3290366	-101
AT1G10120	3304038	3306956	-	0.163585	0.345123	0.578322	3304038	3304043	-5
AT1G10130	3310929	3322269	+	0.206286	0.0677591	0.184728	3322214	3322151	-63
AT1G10140	3322553	3323735	-	0.140114	0.318134	0.54897	3322861	3322964	-103
AT1G10150	3325798	3327614	+	0.137567	0.155726	0.338685	3327567	3327575	8
AT1G10170	3333503	3338188	-	0.208849	0.00534086	0.0246695	3333580	3333663	-83
AT1G10180	3338184	3341628	-	0.12089	0.500905	0.728664	3338265	3338322	-57
AT1G10200	3346382	3348139	-	0.0645319	0.54192	0.761697	3346474	3346403	71
AT1G10210	3349081	3351180	+	0.238095	0.15877	0.343146	3351114	3351082	-32
AT1G10230	3355674	3356151	+	0.126667	0.40809	0.642706	3356291	3356343	52
AT1G10240	3356626	3359853	-	0.0875576	0.999251	1	3356762	3356772	-10
AT1G10270	3363431	3366493	+	0.0900164	0.983977	1	3366495	3366501	6
AT1G10280	3366492	3369125	-	0.265985	0.431247	0.663984	3366545	3366900	-355
AT1G10290	3370401	3377463	+	0.0804165	0.455425	0.686738	3377434	3377352	-82
AT1G10310	3381446	3384003	-	0.218447	0.0258673	0.0884921	3381613	3381656	-43
AT1G10320	3384117	3388376	-	0.371429	0.137399	0.309367	3386786	3387138	-352
AT1G10330	3388598	3390150	+	0.266667	0.588614	0.798617	3390263	3390256	-7
AT1G10350	3392942	3395181	-	0.356566	0.00134024	0.0078143	3393423	3393452	-29
AT1G10360	3395550	3396953	-	0.334165	1.05741e-11	3.10082e-10	3395548	3395591	-43
AT1G10370	3396882	3398358	-	0.179376	8.58663e-06	9.29673e-05	3397088	3397110	-22
AT1G10380	3400553	3402420	+	0.149123	0.668241	0.861676	3402270	3402243	-27
AT1G10390	3406955	3412874	-	0.145729	0.0261282	0.0891567	3407029	3407038	-9
AT1G10410	3416429	3419691	-	0.144676	0.175277	0.367971	3416702	3416700	2
AT1G10430	3428477	3430924	-	0.0786164	0.923939	1	3428478	3428480	-2
AT1G10450	3431763	3438370	+	0.0819672	0.982405	1	3438314	3438328	14
AT1G10470	3441987	3444360	-	0.127493	0.035984	0.114569	3442500	3442522	-22
AT1G10490	3453190	3460620	+	0.180147	0.363854	0.597675	3460054	3460045	-9
AT1G10500	3459999	3461485	-	0.0847933	0.0844148	0.217996	3460005	3460001	4
AT1G10510	3461634	3465786	+	0.0848352	0.717015	0.895579	3465752	3465709	-43
AT1G10522	3469511	3471488	+	0.242713	1.26769e-10	3.2135e-09	3471479	3469839	-1640
AT1G10550	3479065	3481041	-	0.247104	0.246181	0.463957	3479127	3479199	-72
AT1G10560	3484398	3486965	+	0.407051	0.0895098	0.2277	3486963	3486952	-11
AT1G10570	3487385	3491277	+	0.255385	0.0960489	0.239467	3491241	3491172	-69
AT1G10580	3491257	3493834	-	0.253409	0.000324335	0.00230441	3491279	3491339	-60
AT1G10585	3493769	3495244	-	0.235119	0.527746	0.751248	3493923	3494028	-105
AT1G10590	3501987	3503544	-	0.20311	3.51471e-10	8.4769e-09	3502023	3502129	-106
AT1G10600	3503639	3506159	+	0.337702	0.000365136	0.00255547	3505489	3508925	3436
AT1G10610	3506185	3509006	+	0.184125	0.505748	0.733159	3508915	3508925	10
AT1G10630	3512738	3514824	-	0.161107	0.000156419	0.00122651	3513022	3513016	6
AT1G10640	3515181	3518035	-	0.155556	0.610127	0.816414	3515378	3515399	-21
AT1G10650	3523985	3526531	-	0.20045	0.0736369	0.196538	3524040	3524078	-38
AT1G10657	3530352	3532017	+	0.145161	0.742843	0.91135	3531688	3531694	6
AT1G10660	3532228	3535137	+	0.0472011	0.998324	1	3535117	3535123	6
AT1G10670	3535287	3538439	+	0.0863223	0.0191505	0.0697955	3538261	3538269	8
AT1G10690	3549919	3550848	-	0.279221	0.24684	0.464734	3549973	3550031	-58
AT1G10700	3554103	3556544	+	0.25463	0.0114154	0.0459796	3556528	3556457	-71
AT1G10720	3562840	3564850	+	0.158999	0.224938	0.437903	3564737	3564626	-111
AT1G10730	3565256	3568106	+	0.101802	0.992764	1	3567934	3568015	81
AT1G10740	3567904	3571053	-	0.0616214	0.966722	1	3568191	3568179	12
AT1G10750	3574806	3578783	-	0.207018	0.819191	0.959628	3574824	3574816	8
AT1G10760	3580829	3590928	-	0.0758114	0.570242	0.784101	3581052	3581038	14
AT1G10780	3592679	3595220	-	0.2	0.879268	0.989386	3592722	3592723	-1
AT1G10820	3600909	3605076	-	0.179365	0.249767	0.468159	3600911	3601016	-105
AT1G10830	3605511	3607580	-	0.176286	0.0264564	0.0900472	3605603	3605610	-7
AT1G10840	3607630	3610616	-	0.107285	0.00569586	0.025925	3607693	3607738	-45
AT1G10850	3611489	3614613	+	0.118379	0.529664	0.752995	3614502	3614518	16
AT1G10865	3614512	3616308	-	0.133716	0.110237	0.263771	3614528	3614559	-31
AT1G10870	3616609	3623806	-	0.156917	0.531763	0.754696	3616627	3616728	-101
AT1G10890	3627645	3630808	+	0.145136	0.507276	0.734504	3630743	3630752	9
AT1G10900	3632131	3637250	-	0.10823	0.364042	0.59792	3632304	3632275	29
AT1G10910	3639834	3644187	+	0.279788	0.000545143	0.00362683	3644097	3644074	-23
AT1G10920	3644179	3647784	-	0.265734	0.318143	0.54897	3644268	3645856	-1588
AT1G10930	3647875	3655685	-	0.375479	0.0650433	0.179292	3647915	3651082	-3167
AT1G10940	3655672	3658612	-	0.231731	0.00014085	0.00111432	3655793	3655875	-82
AT1G10950	3659203	3664264	+	0.142975	6.52065e-05	0.000572592	3663869	3663829	-40
AT1G10960	3664186	3665040	+	0.0263968	0.47731	0.707618	3665041	3665023	-18
AT1G10970	3665086	3667139	-	0.623188	0.00214215	0.0115972	3665089	3665152	-63
AT1G11000	3671755	3676133	-	0.386447	0.0453373	0.136631	3671815	3671854	-39
AT1G11020	3676690	3678567	+	0.365895	7.46749e-05	0.000642422	3678526	3678491	-35
AT1G11050	3681887	3684169	+	0.18856	0.208832	0.416562	3684185	3683870	-315
AT1G11060	3684567	3689892	+	0.205069	0.398274	0.633143	3689838	3689826	-12
AT1G11080	3694327	3698013	-	0.179487	0.774461	0.931745	3694668	3697636	-2968
AT1G11090	3702607	3703779	+	0.0791249	0.975988	1	3703775	3703774	-1
AT1G11112	3712970	3713735	-	0.136364	0.994464	1	3713039	3713041	-2
AT1G11120	3715083	3717659	+	0.229167	0.416661	0.651491	3717579	3717594	15
AT1G11130	3722707	3727450	+	0.184722	0.370199	0.604741	3727412	3727335	-77
AT1G11180	3745773	3748557	+	0.160714	0.391585	0.627088	3748494	3748503	9
AT1G11200	3753212	3755658	+	0.215064	0.0440754	0.133793	3755588	3755639	51
AT1G11210	3755667	3756998	-	0.285946	0.000736171	0.00466189	3755688	3755740	-52
AT1G11240	3766753	3769799	-	0.223404	0.0152011	0.0581063	3766770	3766769	1
AT1G11260	3777235	3780823	+	0.127506	2.87234e-06	3.47435e-05	3780330	3780222	-108
AT1G11270	3780385	3787099	-	0.181818	0.601497	0.809499	3780457	3780389	68
AT1G11280	3787317	3790935	-	0.190728	0.0902398	0.228934	3787335	3787367	-32
AT1G11290	3791167	3794088	-	0.426136	0.0485508	0.143994	3791237	3791151	86
AT1G11310	3800499	3804233	-	0.0694389	0.611379	0.817676	3800767	3800790	-23
AT1G11320	3806821	3808940	+	0.4625	0.0295876	0.0981149	3808825	3808791	-34
AT1G11330	3809794	3813809	+	0.403045	0.00441418	0.0210814	3813624	3813567	-57
AT1G11350	3817423	3820887	-	0.175309	0.216954	0.427612	3817510	3817560	-50
AT1G11360	3821105	3823088	-	0.0567766	0.965556	1	3821491	3821542	-51
AT1G11380	3832562	3834462	+	0.157143	0.767508	0.926958	3834213	3834244	31
AT1G11390	3834431	3837676	-	0.19332	0.348077	0.581139	3834541	3834458	83
AT1G11400	3837693	3841218	+	0.266027	0.000254653	0.00187382	3840204	3840162	-42
AT1G11410	3840876	3844479	+	0.140436	0.68516	0.874347	3844434	3844430	-4
AT1G11430	3847219	3849224	+	0.336281	3.34978e-34	5.43279e-32	3849140	3849108	-32
AT1G11440	3849200	3850735	+	0.0613306	0.998328	1	3850666	3850659	-7
AT1G11450	3853183	3855507	+	0.151369	0.916305	1	3855437	3855442	5
AT1G11475	3862398	3864074	+	0.0898428	0.167738	0.357425	3863974	3863969	-5
AT1G11480	3864042	3867000	-	0.135836	0.0676869	0.184594	3864223	3864206	17
AT1G11530	3874395	3875484	+	0.124073	0.0768503	0.203204	3875445	3875449	4
AT1G11545	3878494	3880391	-	0.199961	0.0306568	0.100965	3878558	3878631	-73
AT1G11580	3888609	3890824	+	0.0765116	0.838646	0.968921	3890766	3890750	-16
AT1G11600	3901949	3903895	+	0.114669	0.525795	0.74991	3903783	3903834	51
AT1G11630	3912753	3914465	-	0.209591	0.210538	0.418967	3912935	3912920	15
AT1G11650	3914773	3918243	+	0.130711	6.67469e-09	1.3195e-07	3918146	3918062	-84
AT1G11660	3920477	3924566	+	0.0911145	0.836259	0.967633	3924478	3924501	23
AT1G11670	3928114	3931701	-	0.112877	0.854264	0.977767	3928176	3928246	-70
AT1G11680	3938421	3940871	+	0.243017	3.8084e-11	1.02075e-09	3940757	3940733	-24
AT1G11700	3945583	3946757	+	0.0845745	0.904106	1	3946628	3946601	-27
AT1G11710	3948713	3951359	+	0.55	0.010639	0.0433071	3951209	3951201	-8
AT1G11720	3951365	3957044	+	0.056096	0.991187	1	3957041	3957027	-14
AT1G11740	3963053	3966850	-	0.214286	0.803682	0.950426	3963220	3965355	-2135
AT1G11750	3967475	3969877	+	0.042415	0.688463	0.876463	3969727	3969656	-71
AT1G11755	3969680	3971911	-	0.147649	0.523305	0.747789	3969678	3969681	-3
AT1G11760	3971985	3973294	-	0.407737	0.000270569	0.00196906	3972083	3972073	10
AT1G11780	3976838	3979237	-	0.192424	0.213086	0.422599	3977373	3977421	-48
AT1G11790	3981152	3985219	+	0.139181	0.681595	0.871613	3985222	3985219	-3
AT1G11800	3985183	3987290	-	0.285714	0.150013	0.329916	3985306	3985309	-3
AT1G11820	3991026	3993707	-	0.0591683	0.785036	0.938783	3991023	3991024	-1
AT1G11840	3995157	3997965	+	0.192589	1.10759e-11	3.23603e-10	3997787	3997722	-65
AT1G11850	3999156	4000024	+	0.0819497	0.500854	0.728664	3999792	3999791	-1
AT1G11860	4001112	4003748	+	0.0649738	2.91493e-05	0.000278592	4003385	4003364	-21
AT1G11870	4003756	4007015	+	0.0902999	0.838078	0.968476	4006691	4006623	-68
AT1G11880	4007704	4010461	-	0.354386	0.192189	0.392697	4007664	4007683	-19
AT1G11890	4010756	4013104	+	0.212678	0.000491666	0.00332251	4013104	4013035	-69
AT1G11900	4013120	4014688	-	0.205128	0.845452	0.972892	4013049	4013093	-44
AT1G11905	4014781	4016544	+	0.251408	0.0138668	0.0538345	4016540	4016493	-47
AT1G11910	4016711	4021043	-	0.0620603	0.000754274	0.0047592	4016878	4016890	-12
AT1G11930	4028594	4030656	+	0.0835841	0.570575	0.784384	4030534	4030518	-16
AT1G11940	4031533	4034155	-	0.188424	0.64524	0.844695	4031625	4031538	87
AT1G11950	4034478	4039065	-	0.162745	0.911279	1	4034511	4034535	-24
AT1G11960	4039565	4044046	-	0.176951	0.430843	0.663984	4039708	4039748	-40
AT1G12000	4049895	4053871	-	0.260764	3.23331e-07	4.65491e-06	4050037	4050016	21
AT1G12010	4056164	4057968	+	0.400433	0.0621129	0.172924	4057825	4057847	22
AT1G12020	4061362	4063549	-	0.267488	0.0273857	0.0923745	4062460	4062587	-127
AT1G12050	4072740	4076207	+	0.257728	0.000103747	0.00085527	4076151	4076141	-10
AT1G12060	4076225	4077230	+	0.333333	0.433309	0.665733	4077090	4077091	1
AT1G12080	4084161	4085185	+	0.113926	0.374365	0.608266	4085021	4085022	1
AT1G12090	4089663	4090857	-	0.00597765	0.99999	1	4089895	4089896	-1
AT1G12110	4105222	4109601	+	0.0666494	0.659259	0.854809	4109519	4109467	-52
AT1G12120	4114673	4117614	-	0.302521	5.9634e-08	9.83219e-07	4114789	4114819	-30
AT1G12140	4121284	4124595	+	0.203714	0.0508174	0.148664	4123537	4123518	-19
AT1G12200	4137510	4140158	+	0.123724	0.862271	0.981633	4140005	4140027	22
AT1G12220	4144256	4147939	+	0.318182	0.27664	0.501015	4147818	4147855	37
AT1G12230	4147961	4151056	+	0.0626937	0.220357	0.432017	4150891	4150898	7
AT1G12240	4153640	4157653	+	0.141869	0.00117299	0.00697213	4157610	4157553	-57
AT1G12244	4157653	4159046	+	0.123153	0.943061	1	4158987	4159039	52
AT1G12250	4159226	4161506	+	0.268931	8.38309e-08	1.34723e-06	4161459	4161327	-132
AT1G12270	4172034	4174730	+	0.0752228	0.743918	0.912192	4174719	4174709	-10
AT1G12280	4174874	4178021	-	0.393939	0.145268	0.322425	4174736	4174815	-79
AT1G12310	4186652	4188233	-	0.0636965	0.407135	0.641774	4187315	4187314	1
AT1G12320	4186623	4190342	+	0.204793	0.722859	0.898391	4190346	4190337	-9
AT1G12330	4194419	4196749	+	0.255616	0.0170738	0.0635679	4196739	4196735	-4
AT1G12350	4198336	4200849	+	0.406723	1.74773e-06	2.20381e-05	4200791	4200736	-55
AT1G12360	4200863	4206486	+	0.248666	0.000656257	0.00425216	4206291	4206306	15
AT1G12370	4206359	4208999	-	0.269231	0.572396	0.785334	4206407	4206408	-1
AT1G12380	4214257	4217412	-	0.278195	0.489953	0.719111	4214290	4214284	6
AT1G12390	4220043	4221803	+	0.245215	0.00520555	0.0241286	4221775	4221659	-116
AT1G12400	4221778	4222875	+	0.225177	0.220952	0.432592	4222870	4222825	-45
AT1G12410	4223029	4225254	+	0.309179	7.64766e-22	5.3784e-20	4225118	4225039	-79
AT1G12420	4226238	4229211	-	0.338889	0.180975	0.376445	4226399	4226359	40
AT1G12430	4233716	4238795	-	0.182143	0.522436	0.747415	4233886	4233887	-1
AT1G12440	4241420	4243229	-	0.170065	4.21286e-10	1.00389e-08	4241613	4241597	16
AT1G12450	4243903	4245993	+	0.167702	0.792248	0.943107	4245991	4245967	-24
AT1G12460	4247217	4250758	+	0.144868	0.349914	0.583092	4250588	4250562	-26
AT1G12470	4250944	4257392	+	0.13865	0.295612	0.523621	4257398	4257406	8
AT1G12480	4257267	4259300	-	0.338235	0.124186	0.288106	4257294	4257269	25
AT1G12500	4263149	4265156	-	0.114576	0.335957	0.568538	4263264	4263267	-3
AT1G12520	4267073	4268982	-	0.121552	0.221532	0.433358	4267156	4267155	1
AT1G12530	4268985	4270907	-	0.283967	0.077499	0.204409	4268990	4269042	-52
AT1G12570	4277946	4281131	-	0.25641	0.680894	0.871067	4278019	4277989	30
AT1G12580	4282793	4285876	+	0.382459	8.68804e-08	1.39061e-06	4285830	4285782	-48
AT1G12620	4294551	4297178	-	0.190476	0.68879	0.876463	4294731	4294759	-28
AT1G12640	4303279	4305907	-	0.393	3.16329e-07	4.57899e-06	4303384	4303317	67
AT1G12650	4305790	4308007	+	0.134047	0.22694	0.440055	4307903	4308019	116
AT1G12680	4319876	4323265	-	0.439994	9.68449e-08	1.5316e-06	4319878	4319925	-47
AT1G12710	4326738	4328616	-	0.419118	0.00955267	0.0396941	4326749	4326803	-54
AT1G12730	4334498	4337957	+	0.290476	0.498706	0.727225	4337841	4337760	-81
AT1G12750	4344942	4348390	-	0.111155	0.901177	0.999642	4344980	4344981	-1
AT1G12760	4348497	4350993	+	0.0902778	0.443937	0.676244	4350759	4350756	-3
AT1G12770	4351018	4353797	+	0.265476	8.92517e-06	9.62393e-05	4353606	4353577	-29
AT1G12780	4355925	4358894	-	0.0267014	0.999619	1	4355972	4355967	5
AT1G12790	4358894	4361371	-	0.377574	0.077012	0.203531	4359294	4359290	4
AT1G12800	4361550	4365414	-	0.0540365	0.490412	0.719136	4361635	4361619	16
AT1G12810	4367255	4368822	+	0.220403	6.37372e-05	0.000561552	4368775	4368754	-21
AT1G12820	4368759	4371298	-	0.166031	0.0180919	0.0665785	4368784	4368805	-21
AT1G12830	4374248	4375247	-	0.146714	0.454631	0.686099	4374243	4374271	-28
AT1G12840	4374204	4378514	+	0.0862453	0.0332445	0.107615	4378506	4378486	-20
AT1G12845	4378831	4379607	-	0.0545794	0.994825	1	4378882	4378935	-53
AT1G12850	4379693	4381764	-	0.0530117	0.889364	0.994824	4379772	4379745	27
AT1G12860	4384303	4386651	+	0.190497	0.00745297	0.0324097	4386593	4386549	-44
AT1G12880	4389677	4391344	+	0.269231	0.683282	0.872825	4390988	4390207	-781
AT1G12900	4392437	4394454	-	0.0883587	6.92492e-23	5.29157e-21	4392462	4392502	-40
AT1G12910	4394896	4396291	-	0.0653038	0.834233	0.96754	4394977	4394968	9
AT1G12920	4396347	4398193	-	0.187875	1.4582e-05	0.000150205	4396382	4396363	19
AT1G12930	4398321	4405669	-	0.186486	0.473495	0.703931	4398388	4398375	13
AT1G12970	4423539	4425936	+	0.19697	0.301348	0.530312	4425798	4425782	-16
AT1G12990	4433604	4436102	+	0.131868	0.640855	0.840964	4436058	4436072	14
AT1G13000	4436100	4439639	-	0.276667	0.0094799	0.0394847	4436214	4436131	83
AT1G13020	4440403	4443954	-	0.168329	0.164676	0.352646	4440630	4440493	137
AT1G13030	4444042	4447412	-	0.252874	0.322127	0.552903	4444071	4444088	-17
AT1G13040	4447548	4450001	+	0.217949	0.88938	0.994824	4451730	4451742	12
AT1G13050	4449712	4451742	+	0.169231	0.978211	1	4451709	4451729	20
AT1G13060	4452189	4454900	+	0.141264	0.000401669	0.00277209	4454806	4454808	2
AT1G13080	4459001	4460996	+	0.128756	0.382983	0.618233	4460930	4460937	7
AT1G13090	4461737	4463469	+	0.13698	0.158807	0.343178	4463546	4463460	-86
AT1G13100	4463858	4465725	+	0.265714	0.264053	0.485051	4465593	4465609	16
AT1G13110	4467093	4469033	+	0.0475739	0.954978	1	4468985	4468966	-19
AT1G13120	4469143	4473319	-	0.189524	0.308918	0.538622	4469235	4469185	50
AT1G13160	4484583	4488577	+	0.201125	0.0826663	0.214654	4488577	4488531	-46
AT1G13170	4488532	4492667	-	0.196429	0.242722	0.459574	4488657	4488641	16
AT1G13180	4494923	4498469	+	0.215686	0.437341	0.669533	4498377	4498437	60
AT1G13190	4498763	4501624	+	0.136657	0.0401187	0.124589	4501545	4499336	-2209
AT1G13195	4501580	4503676	-	0.375774	0.0129239	0.0509078	4501660	4501598	62
AT1G13210	4508905	4514010	-	0.133333	0.730697	0.903619	4509038	4509037	1
AT1G13220	4515463	4520306	+	0.372645	0.011146	0.0450546	4520305	4520249	-56
AT1G13245	4525413	4526204	-	0.0574237	0.0079283	0.0340482	4525544	4525504	40
AT1G13250	4528484	4530222	-	0.123232	0.412488	0.647387	4528620	4528661	-41
AT1G13260	4542167	4543970	+	0.117852	0.0211428	0.0754749	4543589	4543595	6
AT1G13270	4544888	4547373	+	0.144839	0.144468	0.320934	4547228	4547236	8
AT1G13280	4547387	4548894	+	0.0787361	0.576137	0.788118	4548705	4548707	2
AT1G13300	4556877	4558793	+	0.294118	0.472186	0.702577	4558716	4558650	-66
AT1G13320	4563427	4567849	-	0.0547392	0.822973	0.962201	4563523	4563546	-23
AT1G13340	4569447	4571229	-	0.212121	0.76392	0.925015	4569443	4569494	-51
AT1G13350	4572303	4576711	-	0.116981	0.581543	0.792745	4572354	4572437	-83
AT1G13360	4576872	4578369	-	0.0896456	0.122982	0.286147	4576965	4576955	10
AT1G13380	4588993	4590501	-	0.284731	1.28593e-08	2.39889e-07	4589088	4589072	16
AT1G13390	4592303	4594468	-	0.12296	0.195204	0.396849	4592503	4592494	9
AT1G13440	4608076	4610878	-	0.139189	1.22619e-45	3.19492e-43	4608248	4608264	-16
AT1G13450	4612730	4615353	-	0.26723	0.00199959	0.0109705	4612755	4612843	-88
AT1G13460	4615766	4618449	+	0.132951	0.603526	0.81081	4618306	4618343	37
AT1G13560	4638467	4642190	-	0.108239	0.0367199	0.116191	4638617	4638635	-18
AT1G13570	4642123	4644422	-	0.135547	0.643735	0.843559	4642356	4642417	-61
AT1G13580	4644520	4647142	-	0.233968	0.224842	0.437842	4644712	4644744	-32
AT1G13640	4677003	4679862	-	0.21302	0.00577177	0.0262104	4677023	4677128	-105
AT1G13650	4680289	4682382	-	0.28373	0.00294399	0.0151234	4680452	4680492	-40
AT1G13670	4688017	4689265	+	0.169231	0.450871	0.682424	4688952	4688928	-24
AT1G13690	4693281	4694410	+	0.0929269	0.617374	0.822717	4694328	4694458	130
AT1G13700	4694371	4696023	-	0.322222	0.0186192	0.0682503	4694362	4694386	-24
AT1G13710	4702656	4704694	-	0.255556	0.201166	0.405445	4702695	4702708	-13
AT1G13730	4709756	4712672	+	0.135	0.345577	0.578731	4712538	4712537	-1
AT1G13740	4713432	4715407	+	0.133333	0.833816	0.967419	4715390	4715406	16
AT1G13770	4721573	4724520	+	0.11303	0.929716	1	4724509	4724507	-2
AT1G13780	4724543	4726558	+	0.180952	0.808952	0.953586	4726494	4726496	2
AT1G13810	4733990	4735453	+	0.180645	0.476365	0.706612	4735384	4735371	-13
AT1G13820	4735473	4737910	+	0.22753	1.56323e-05	0.000159781	4737893	4737752	-141
AT1G13860	4743203	4746956	-	0.130814	0.844723	0.972689	4743236	4743336	-100
AT1G13870	4747185	4748666	-	0.220621	0.0693296	0.187753	4747272	4747282	-10
AT1G13880	4748830	4751234	+	0.175862	0.11569	0.273162	4751205	4751122	-83
AT1G13900	4753098	4755656	-	0.18833	0.0635709	0.176089	4753268	4753341	-73
AT1G13910	4755776	4758076	+	0.241026	0.752291	0.916797	4757986	4757992	6
AT1G13930	4760956	4762666	+	0.0190334	0.659793	0.854876	4761718	4761715	-3
AT1G13940	4762478	4766852	-	0.142857	0.468466	0.699231	4762536	4762581	-45
AT1G13950	4773433	4774935	+	0.13705	0.707108	0.889003	4774800	4774792	-8
AT1G13960	4776282	4779420	+	0.100839	0.789881	0.941973	4779353	4779363	10
AT1G13980	4788462	4794654	+	0.0770267	0.671254	0.863596	4794518	4794502	-16
AT1G13990	4794663	4796599	+	0.197555	0.0226734	0.0797811	4796596	4796592	-4
AT1G14000	4797357	4800283	+	0.105393	0.266814	0.488791	4800245	4800248	3
AT1G14010	4800168	4801850	-	0.0630928	0.987004	1	4800257	4800322	-65
AT1G14020	4802719	4805375	+	0.164214	0.427475	0.661373	4805347	4805296	-51
AT1G14030	4805305	4807517	-	0.201495	0.00764134	0.033057	4805311	4805306	5
AT1G14040	4810114	4814724	+	0.491453	0.0336992	0.108644	4814751	4814727	-24
AT1G14060	4816927	4818112	-	0.109368	0.794393	0.94443	4817195	4817183	12
AT1G14120	4833395	4835089	-	0.0746269	0.989657	1	4833549	4833538	11
AT1G14130	4835723	4837771	-	0.170811	0.735829	0.907116	4835910	4835925	-15
AT1G14140	4837926	4839633	-	0.224859	0.084439	0.217996	4838001	4838021	-20
AT1G14150	4839800	4840823	+	0.133001	0.00539316	0.0248338	4840722	4840650	-72
AT1G14170	4843183	4845913	-	0.381481	0.0228969	0.0803719	4843245	4843318	-73
AT1G14180	4847161	4849413	+	0.233333	0.462541	0.693027	4847832	4849209	1377
AT1G14185	4850116	4852096	+	0.164286	0.965543	1	4852022	4852076	54
AT1G14190	4852521	4854307	+	0.142857	0.97851	1	4854363	4854371	8
AT1G14200	4854223	4855287	-	0.130435	0.762643	0.924102	4854352	4854381	-29
AT1G14205	4855532	4856762	+	0.252252	0.314017	0.544511	4857321	4857227	-94
AT1G14210	4856777	4857975	-	0.0719212	0.912799	1	4856772	4856774	-2
AT1G14230	4861167	4864094	+	0.296479	0.00198826	0.0109272	4864068	4864030	-38
AT1G14250	4868345	4871488	+	0.0680272	0.840947	0.970334	4871453	4871460	7
AT1G14270	4874874	4877256	-	0.269775	3.11638e-07	4.5152e-06	4874896	4874971	-75
AT1G14280	4877505	4879307	+	0.055972	0.29398	0.52172	4879054	4879059	5
AT1G14290	4880029	4882265	-	0.130781	0.250035	0.468529	4880084	4880106	-22
AT1G14300	4882335	4884818	-	0.134167	0.572424	0.785334	4882413	4882427	-14
AT1G14310	4884950	4886793	+	0.221433	0.120697	0.282112	4886773	4886790	17
AT1G14320	4888113	4889704	+	0.0552899	0.000166396	0.00128947	4889581	4889665	84
AT1G14330	4890068	4892332	-	0.108211	0.938564	1	4890152	4890139	13
AT1G14340	4897345	4899035	+	0.207818	0.254723	0.474183	4898912	4899021	109
AT1G14345	4899044	4900054	+	0.176149	5.80402e-09	1.16037e-07	4899928	4899841	-87
AT1G14350	4907886	4911168	+	0.0769231	0.998016	1	4911210	4911205	-5
AT1G14360	4911092	4913167	-	0.139935	0.402454	0.636917	4911209	4911197	12
AT1G14370	4915490	4918138	+	0.245055	0.138007	0.310471	4918090	4918078	-12
AT1G14380	4918009	4921682	-	0.255268	9.71134e-05	0.000808973	4918014	4918077	-63
AT1G14400	4926485	4928812	-	0.29165	2.19884e-28	2.44394e-26	4927085	4927129	-44
AT1G14410	4928920	4931080	-	0.247751	0.00435458	0.0208594	4929120	4929147	-27
AT1G14440	4938753	4941332	-	0.113802	0.580227	0.791871	4938757	4938969	-212
AT1G14450	4946191	4947670	-	0.218414	2.49733e-08	4.44984e-07	4946274	4946311	-37
AT1G14460	4948637	4953284	-	0.102515	0.940931	1	4948739	4948742	-3
AT1G14510	4961593	4964515	-	0.181642	0.000308761	0.00221255	4961898	4961939	-41
AT1G14520	4968133	4970311	-	0.352381	0.0411494	0.127045	4968222	4968210	12
AT1G14530	4970857	4973726	-	0.228571	0.676795	0.868059	4971157	4971187	-30
AT1G14560	4980623	4983367	+	0.249237	0.0181511	0.0667502	4983251	4983232	-19
AT1G14570	4983488	4987375	+	0.0823733	0.397033	0.631811	4987298	4987315	17
AT1G14580	4989561	4992805	+	0.0949275	0.133307	0.303203	4992728	4992718	-10
AT1G14590	4998766	5000710	-	0.378205	0.00134134	0.00781787	4998812	4998889	-77
AT1G14600	5000985	5003637	-	0.297797	0.0194822	0.0708156	5001083	5001122	-39
AT1G14610	5008152	5014533	-	0.201587	5.62507e-05	0.000501993	5008265	5008312	-47
AT1G14620	5014674	5016708	-	0.137227	0.250479	0.469028	5014762	5014801	-39
AT1G14630	5019799	5021653	+	0.283654	0.535459	0.757349	5021573	5021585	12
AT1G14650	5027315	5031883	+	0.0597392	0.914176	1	5030776	5030775	-1
AT1G14660	5031942	5036610	-	0.294737	0.392873	0.628208	5031980	5031992	-12
AT1G14670	5037575	5040597	+	0.14852	2.39894e-05	0.000233919	5040514	5040482	-32
AT1G14685	5042239	5045556	+	0.173498	0.00288116	0.0148438	5044079	5044212	133
AT1G14690	5051655	5055299	-	0.153409	0.206781	0.414084	5051769	5051759	10
AT1G14700	5058582	5061140	+	0.175555	0.0250302	0.0862124	5061140	5061059	-81
AT1G14710	5061693	5065303	-	0.11099	0.283433	0.509545	5061994	5061997	-3
AT1G14720	5066524	5068677	-	0.106406	0.14888	0.328155	5066697	5066706	-9
AT1G14730	5073030	5074798	+	0.116525	0.925246	1	5074730	5074732	2
AT1G14740	5075178	5077981	-	0.175205	0.0313965	0.102932	5075233	5075288	-55
AT1G14770	5086594	5088898	-	0.256917	0.287154	0.513504	5086698	5086712	-14
AT1G14790	5093960	5098270	-	0.176471	0.809546	0.953883	5094213	5094215	-2
AT1G14810	5102423	5104850	-	0.215261	2.31986e-07	3.45242e-06	5102522	5102599	-77
AT1G14820	5104974	5107107	-	0.127534	0.602283	0.810009	5105130	5105156	-26
AT1G14830	5107415	5111746	-	0.229399	3.48957e-06	4.12981e-05	5107468	5107613	-145
AT1G14840	5111700	5115514	-	0.170522	0.0740171	0.197321	5112120	5112145	-25
AT1G14850	5116522	5123559	-	0.189394	0.160904	0.346674	5116641	5116692	-51
AT1G14860	5124669	5126280	+	0.210565	0.437827	0.669825	5126145	5126148	3
AT1G14870	5128343	5129731	-	0.198501	0.0762562	0.202114	5128440	5128484	-44
AT1G14890	5136873	5137982	+	0.174838	0.000805008	0.00501363	5137936	5137888	-48
AT1G14900	5138115	5139467	-	0.0927946	0.118174	0.277616	5138401	5138467	-66
AT1G14910	5139711	5143735	-	0.484146	1.72394e-19	1.03789e-17	5139748	5139829	-81
AT1G14920	5148981	5151415	+	0.111202	0.00101952	0.00618247	5151268	5151158	-110
AT1G14960	5159191	5160179	-	0.166667	0.978172	1	5159226	5159203	23
AT1G14980	5165488	5166939	-	0.131083	3.19195e-05	0.000301264	5165730	5165777	-47
AT1G14990	5166912	5168336	-	0.110769	0.895608	0.998022	5167148	5167234	-86
AT1G15000	5168595	5170066	+	0.11664	0.549975	0.769038	5170067	5170079	12
AT1G15010	5171180	5171956	+	0.160299	0.738293	0.908833	5171752	5171725	-27
AT1G15020	5172231	5176479	-	0.222507	0.0279473	0.0937317	5173230	5173010	220
AT1G15030	5177479	5180049	+	0.114696	0.464625	0.695297	5179038	5180051	1013
AT1G15040	5179886	5181402	-	0.241486	0.421404	0.65626	5179899	5179903	-4
AT1G15060	5183257	5187106	-	0.171756	0.0424056	0.129981	5183618	5183656	-38
AT1G15080	5187548	5189673	+	0.166667	0.907155	1	5189681	5189639	-42
AT1G15100	5193283	5194214	-	0.138889	0.448791	0.680246	5193414	5193495	-81
AT1G15110	5198939	5202315	+	0.231373	0.377123	0.611632	5202092	5202051	-41
AT1G15120	5202592	5204494	+	0.238311	2.81799e-18	1.5498e-16	5204112	5204022	-90
AT1G15130	5206001	5209979	-	0.429399	2.27123e-16	1.0906e-14	5206004	5206094	-90
AT1G15140	5210180	5212349	-	0.0709289	0.571672	0.785252	5210252	5210249	3
AT1G15165	5217718	5220113	-	0.1875	0.871646	0.986186	5218971	5216979	1992
AT1G15170	5220402	5222973	+	0.229391	0.303656	0.532806	5222917	5222919	2
AT1G15180	5224293	5226778	+	0.269707	7.03246e-07	9.54517e-06	5226686	5226671	-15
AT1G15200	5228299	5231184	-	0.0408805	0.999986	1	5228334	5228360	-26
AT1G15210	5231344	5236886	-	0.308081	0.45784	0.68884	5231393	5231450	-57
AT1G15215	5238043	5240051	+	0.352034	0.057512	0.162989	5240026	5240143	117
AT1G15220	5240028	5241541	-	0.193323	0.271116	0.493587	5240161	5240229	-68
AT1G15230	5242072	5243262	-	0.128254	0.240545	0.456777	5242514	5242521	-7
AT1G15240	5243382	5248693	+	0.222934	0.0286345	0.0956529	5248688	5248666	-22
AT1G15250	5248663	5249676	-	0.0756361	0.321798	0.552718	5248674	5248660	14
AT1G15260	5249759	5250573	+	0.0708812	0.428485	0.662163	5250547	5250562	15
AT1G15270	5250649	5252121	-	0.0832948	0.0109734	0.0444586	5250656	5250721	-65
AT1G15280	5252284	5256863	+	0.192036	0.00627736	0.0280654	5256725	5256670	-55
AT1G15290	5256869	5265155	-	0.234465	1.80746e-05	0.000181821	5257049	5257130	-81
AT1G15340	5275615	5277869	-	0.0572376	0.569987	0.783935	5275700	5275694	6
AT1G15350	5278026	5279988	-	0.125685	0.108705	0.261248	5278289	5278063	226
AT1G15370	5286865	5288640	+	0.261129	2.46882e-06	3.03475e-05	5288600	5288506	-94
AT1G15380	5290581	5292582	+	0.1176	0.136301	0.307855	5292505	5292468	-37
AT1G15390	5294628	5295931	+	0.0811594	0.679285	0.869976	5295771	5295756	-15
AT1G15400	5295755	5297075	-	0.34357	9.41189e-17	4.70417e-15	5296250	5296286	-36
AT1G15410	5298323	5300927	+	0.104762	0.757546	0.920471	5300909	5300911	2
AT1G15420	5301515	5303522	-	0.552183	1.809e-11	5.15272e-10	5301613	5301651	-38
AT1G15430	5304097	5306087	+	0.105066	0.951195	1	5305969	5305958	-11
AT1G15440	5306026	5309558	-	0.155052	0.239594	0.455678	5306054	5306082	-28
AT1G15470	5315498	5317941	+	0.247347	0.175207	0.367962	5317866	5317815	-51
AT1G15480	5317972	5320630	+	0.150943	0.82697	0.96403	5320518	5320561	43
AT1G15490	5320614	5323895	-	0.216092	0.447395	0.679233	5320613	5320625	-12
AT1G15500	5326289	5328875	+	0.103333	0.000401636	0.00277209	5328814	5328787	-27
AT1G15510	5329063	5331711	+	0.292848	0.0590125	0.16645	5331875	5331882	7
AT1G15570	5361864	5365559	+	0.324074	0.0610266	0.170527	5365536	5365483	-53
AT1G15580	5365511	5366497	-	0.0843394	0.937277	1	5365527	5365524	3
AT1G15660	5381031	5385380	+	0.185	0.394646	0.629893	5385237	5385256	19
AT1G15670	5389951	5391672	+	0.127025	0.302292	0.531544	5391475	5391371	-104
AT1G15690	5398925	5402733	+	0.0888511	1.27951e-05	0.000133618	5402444	5402428	-16
AT1G15700	5402568	5403818	-	0.187302	0.517698	0.743296	5402586	5402557	29
AT1G15710	5404129	5405910	+	0.117896	0.558331	0.775722	5405734	5405744	10
AT1G15730	5407400	5410043	-	0.389118	3.08679e-13	1.09025e-11	5407442	5407465	-23
AT1G15740	5410907	5414919	+	0.155663	0.00310214	0.0158081	5414896	5414699	-197
AT1G15750	5414816	5421033	-	0.161746	8.35875e-05	0.00070969	5414929	5414814	115
AT1G15780	5430039	5436618	-	0.211329	0.0154699	0.0589117	5430180	5430229	-49
AT1G15790	5438170	5440131	-	0.244444	0.55975	0.776616	5438359	5438360	-1
AT1G15800	5441071	5443911	-	0.120741	0.722212	0.898117	5441094	5441102	-8
AT1G15810	5444219	5446564	+	0.141162	0.201302	0.405616	5446509	5446551	42
AT1G15820	5446461	5447880	-	0.0155873	0.00708952	0.0311273	5446590	5446644	-54
AT1G15830	5448059	5450617	+	0.174107	0.71346	0.893568	5449855	5448520	-1335
AT1G15860	5454765	5457022	+	0.146647	0.0493357	0.14586	5456955	5456930	-25
AT1G15880	5458397	5460359	-	0.329543	3.85501e-09	7.91622e-08	5458543	5458598	-55
AT1G15885	5460476	5461297	+	0.197222	0.345035	0.578236	5461283	5461244	-39
AT1G15910	5465250	5469180	+	0.171212	0.338391	0.570668	5469126	5469192	66
AT1G15920	5469254	5471149	+	0.0993447	0.707908	0.889516	5470738	5470861	123
AT1G15930	5471315	5473048	+	0.159243	3.61718e-24	2.96347e-22	5472908	5472881	-27
AT1G15940	5473358	5478405	+	0.178252	0.4441	0.676427	5478258	5478183	-75
AT1G15950	5478602	5482180	+	0.175546	1.44526e-09	3.17278e-08	5482163	5482137	-26
AT1G15970	5486272	5489132	-	0.244107	0.048885	0.144851	5486286	5486451	-165
AT1G15980	5489144	5491363	+	0.166145	2.40022e-10	5.8963e-09	5491254	5491319	65
AT1G16000	5494532	5495359	+	0.0959175	0.900725	0.999596	5495319	5495324	5
AT1G16010	5495372	5497723	-	0.358334	3.75151e-09	7.7437e-08	5495326	5495379	-53
AT1G16020	5498011	5501358	+	0.148741	0.405909	0.640413	5501218	5501222	4
AT1G16030	5501965	5504535	-	0.238445	0.39694	0.631811	5502209	5502212	-3
AT1G16040	5504607	5507059	+	0.176948	0.31894	0.549809	5506623	5506603	-20
AT1G16060	5508310	5511736	+	0.229249	0.318977	0.549812	5511730	5511721	-9
AT1G16080	5514261	5516027	+	0.326519	2.101e-18	1.1676e-16	5515972	5515920	-52
AT1G16090	5516258	5517822	+	0.161765	0.936763	1	5517933	5517896	-37
AT1G16110	5518218	5520929	+	0.188889	0.84966	0.975195	5520817	5520101	-716
AT1G16170	5538665	5540002	-	0.191711	0.025838	0.0884301	5538721	5538746	-25
AT1G16180	5540049	5542902	+	0.0684463	0.0975959	0.242109	5542836	5542827	-9
AT1G16190	5543118	5546103	+	0.395062	1.86585e-05	0.000186985	5546110	5546089	-21
AT1G16210	5546098	5547753	-	0.156454	0.0091221	0.038336	5546132	5546165	-33
AT1G16240	5554842	5556844	-	0.0707407	0.304814	0.53435	5555016	5555021	-5
AT1G16250	5556963	5559520	+	0.135531	0.823644	0.962502	5559515	5559511	-4
AT1G16260	5559497	5562192	-	0.148718	0.432882	0.665718	5559500	5559546	-46
AT1G16270	5562860	5568368	+	0.138322	0.634431	0.835995	5568369	5568335	-34
AT1G16280	5567741	5570679	-	0.181579	0.390304	0.625833	5568301	5568316	-15
AT1G16300	5574256	5577622	+	0.120669	0.977084	1	5577537	5577543	6
AT1G16320	5580820	5582154	+	0.124667	0.000386989	0.00268477	5582111	5582105	-6
AT1G16340	5587721	5590761	-	0.196621	0.25759	0.477562	5587810	5587825	-15
AT1G16350	5590755	5593098	+	0.225642	0.00041127	0.00283098	5593031	5592986	-45
AT1G16370	5596632	5598447	+	0.171053	0.911896	1	5598438	5598436	-2
AT1G16390	5602785	5604770	+	0.143678	0.930371	1	5604577	5604551	-26
AT1G16400	5605043	5607498	+	0.308621	0.171033	0.362142	5607487	5607477	-10
AT1G16410	5608681	5612064	+	0.0698157	0.480879	0.710544	5611319	5611331	12
AT1G16430	5614592	5615660	+	0.24183	0.22334	0.4355	5615501	5615504	3
AT1G16445	5617785	5619456	+	0.310345	0.358179	0.59219	5619445	5619397	-48
AT1G16460	5619544	5622674	-	0.0645624	0.702883	0.885835	5619693	5619690	3
AT1G16470	5622745	5625683	+	0.0734946	0.343847	0.576792	5625591	5625592	1
AT1G16500	5638778	5640202	+	0.111111	0.916759	1	5640157	5640178	21
AT1G16510	5644571	5645443	-	0.090796	0.968286	1	5644663	5644656	7
AT1G16515	5647461	5648114	-	0.120202	0.97536	1	5647541	5647558	-17
AT1G16520	5648635	5651167	+	0.291026	0.0565121	0.160709	5651159	5651148	-11
AT1G16540	5659369	5665488	+	0.306763	0.246937	0.464741	5665487	5665446	-41
AT1G16560	5668383	5670708	+	0.142761	0.0661771	0.181593	5670714	5670595	-119
AT1G16570	5670576	5673600	-	0.302458	0.025072	0.0862537	5670572	5670627	-55
AT1G16590	5673706	5675143	+	0.160606	0.960771	1	5675113	5675134	21
AT1G16610	5675494	5678873	-	0.113339	0.12696	0.292577	5675663	5675709	-46
AT1G16650	5687870	5691369	+	0.192222	0.598776	0.807666	5691241	5691259	18
AT1G16670	5697215	5699870	+	0.244444	0.176099	0.36915	5699788	5699772	-16
AT1G16680	5702152	5705892	+	0.192276	0.136532	0.308035	5705872	5705844	-28
AT1G16690	5705896	5709563	+	0.113846	0.993887	1	5709578	5709505	-73
AT1G16700	5709623	5712043	+	0.163354	0.00259951	0.0136269	5711903	5711888	-15
AT1G16710	5713793	5722614	+	0.36001	0.000420409	0.00288888	5722345	5722335	-10
AT1G16720	5722890	5726478	+	0.235703	1.09258e-15	4.86428e-14	5726390	5726366	-24
AT1G16730	5726367	5727406	-	0.102823	0.659238	0.854809	5726358	5726367	-9
AT1G16740	5727621	5729115	+	0.133711	0.176246	0.369316	5729075	5729059	-16
AT1G16750	5729056	5731934	-	0.136336	0.816278	0.957909	5729133	5729184	-51
AT1G16780	5739467	5744636	-	0.338816	0.0278675	0.0935431	5739267	5739290	-23
AT1G16790	5744334	5745259	+	0.095594	0.888098	0.99437	5745213	5745208	-5
AT1G16800	5744483	5755468	-	0.411111	0.0918581	0.232018	5745240	5747200	-1960
AT1G16810	5755587	5756895	+	0.177343	5.56501e-05	0.000497191	5756823	5756842	19
AT1G16825	5758854	5760509	+	0.178378	0.531314	0.754372	5760475	5760483	8
AT1G16840	5762693	5764184	-	0.0643519	0.720332	0.897253	5762752	5762696	56
AT1G16860	5767299	5770602	+	0.129014	0.308954	0.538622	5770528	5770529	1
AT1G16870	5770731	5773322	-	0.073385	0.928489	1	5770753	5770743	10
AT1G16880	5773511	5776308	+	0.0662622	0.0063178	0.0282382	5776274	5776260	-14
AT1G16890	5776176	5778529	-	0.0764965	0.0854725	0.22	5776345	5776370	-25
AT1G16900	5779007	5782433	-	0.181929	0.273668	0.496943	5779050	5779052	-2
AT1G16916	5786556	5787329	-	0.287594	0.00554396	0.0253863	5786601	5786646	-45
AT1G16920	5787149	5789312	-	0.100242	0.262905	0.483635	5787331	5787349	-18
AT1G16930	5789678	5791752	+	0.471292	0.0137791	0.0535988	5791736	5791732	-4
AT1G16960	5799740	5800887	+	0.143189	0.424364	0.658354	5800828	5800787	-41
AT1G16970	5800766	5805811	-	0.177778	0.661535	0.856191	5800924	5800983	-59
AT1G17020	5820079	5822013	+	0.278293	0.424224	0.658202	5821931	5821821	-110
AT1G17040	5824770	5828266	+	0.4375	0.0913696	0.231216	5828259	5828271	12
AT1G17050	5828914	5831383	+	0.124986	0.115721	0.273172	5831326	5831279	-47
AT1G17060	5832093	5835488	-	0.241026	0.752291	0.916797	5832104	5832116	-12
AT1G17070	5837589	5840332	+	0.19888	0.405287	0.639813	5840295	5840266	-29
AT1G17080	5840268	5841745	-	0.243907	3.50813e-08	6.10046e-07	5840272	5840301	-29
AT1G17090	5842167	5844367	-	0.226667	0.661957	0.856352	5842215	5842236	-21
AT1G17100	5844645	5845661	+	0.150588	0.00241226	0.0128116	5845653	5845599	-54
AT1G17110	5845674	5850934	-	0.36902	1.25469e-06	1.62395e-05	5845673	5845624	49
AT1G17120	5851859	5853987	+	0.340121	7.34851e-07	9.93174e-06	5853956	5853839	-117
AT1G17130	5854092	5856697	+	0.180519	0.0268814	0.0910455	5856607	5856582	-25
AT1G17140	5856572	5858550	-	0.109317	0.704119	0.886367	5856582	5856599	-17
AT1G17145	5860077	5862890	-	0.222424	0.0526103	0.152564	5860097	5860192	-95
AT1G17147	5863108	5864059	-	0.171123	0.865139	0.983022	5863546	5863405	141
AT1G17160	5867534	5869436	+	0.10527	0.686847	0.875792	5869266	5869339	73
AT1G17170	5869542	5870883	+	0.143582	0.699331	0.883558	5870842	5870847	5
AT1G17190	5875294	5876620	+	0.347673	0.00038568	0.00267802	5876508	5876494	-14
AT1G17200	5878389	5880073	+	0.1251	0.000694223	0.00443666	5879995	5879962	-33
AT1G17210	5879995	5884773	-	0.144128	0.0248575	0.0856831	5880285	5880156	129
AT1G17220	5885006	5890500	+	0.300946	9.61333e-34	1.49798e-31	5890397	5890376	-21
AT1G17230	5890615	5895141	+	0.285714	0.202248	0.407005	5895046	5895044	-2
AT1G17270	5909084	5911708	-	0.285714	0.168749	0.358809	5909291	5909347	-56
AT1G17280	5916831	5920393	-	0.176813	0.00198056	0.0108924	5916874	5916895	-21
AT1G17290	5922331	5926400	+	0.182331	2.03847e-09	4.36063e-08	5926375	5926275	-100
AT1G17330	5929825	5931926	+	0.122807	0.765198	0.925646	5931816	5931858	42
AT1G17340	5933779	5938817	+	0.236014	0.182018	0.377921	5938783	5938738	-45
AT1G17350	5941548	5944465	+	0.203571	0.546608	0.766187	5944449	5944447	-2
AT1G17360	5946447	5951561	+	0.319298	2.12418e-05	0.000210747	5951553	5951494	-59
AT1G17370	5951541	5955143	-	0.252354	1.73598e-08	3.17876e-07	5951641	5951655	-14
AT1G17380	5955154	5957511	-	0.194139	0.888457	0.994576	5955562	5955525	37
AT1G17410	5968409	5969995	-	0.398026	0.00549218	0.0252	5968442	5968526	-84
AT1G17420	5977322	5981521	+	0.380455	0.012896	0.0508133	5981481	5981409	-72
AT1G17430	5982144	5984013	+	0.111111	0.98495	1	5983934	5983977	43
AT1G17440	5983983	5987934	-	0.148628	0.201581	0.405972	5983989	5984034	-45
AT1G17450	5988279	5997033	-	0.377143	0.0227081	0.0798855	5988334	5988483	-149
AT1G17455	5997056	5998599	+	0.324526	0.0268748	0.0910455	5998469	5998424	-45
AT1G17470	6002887	6006410	+	0.20089	9.37868e-07	1.24845e-05	6006371	6006331	-40
AT1G17480	6006412	6008501	-	0.428571	0.135944	0.30731	6006455	6006513	-58
AT1G17490	6008436	6009420	+	0.100733	0.745011	0.912617	6009282	6009269	-13
AT1G17500	6017807	6023503	+	0.196992	0.237634	0.453306	6023489	6023516	27
AT1G17510	6023503	6024309	-	0.168889	0.30368	0.532806	6023580	6023587	-7
AT1G17520	6024635	6027565	-	0.472515	1.39409e-05	0.000143975	6024746	6024783	-37
AT1G17530	6027486	6029115	+	0.0917208	0.362288	0.595965	6028442	6028449	7
AT1G17550	6034269	6037398	+	0.236685	0.000383421	0.0026635	6037284	6037230	-54
AT1G17560	6037404	6038698	-	0.211538	0.491935	0.720894	6037500	6037622	-122
AT1G17580	6039249	6049685	+	0.120395	0.528183	0.751695	6049540	6049554	14
AT1G17590	6050163	6052628	-	0.438406	0.0677772	0.18474	6050252	6050340	-88
AT1G17620	6061894	6063362	+	0.0627816	0.918407	1	6063273	6063282	9
AT1G17640	6067085	6069392	-	0.197143	0.834626	0.96754	6067217	6067292	-75
AT1G17650	6069423	6072140	-	0.258065	0.00129407	0.00756732	6069473	6069501	-28
AT1G17680	6076070	6082395	+	0.295923	0.0048008	0.0226019	6082337	6082256	-81
AT1G17690	6082721	6088381	-	0.0689103	0.999623	1	6082740	6082758	-18
AT1G17700	6089459	6090339	+	0.163034	0.722002	0.897957	6090230	6090245	15
AT1G17720	6093184	6098443	-	0.32423	2.74376e-05	0.000263182	6093430	6093302	128
AT1G17730	6099038	6100397	+	0.140931	0.134823	0.305602	6100332	6100298	-34
AT1G17745	6100963	6105347	+	0.16949	0.362925	0.596765	6105228	6105181	-47
AT1G17760	6110106	6116617	-	0.227422	0.0748791	0.199056	6110114	6110105	9
AT1G17780	6123566	6125339	+	0.18453	0.0384698	0.120719	6125255	6125257	2
AT1G17790	6125277	6127567	-	0.156863	0.848291	0.974468	6125365	6125369	-4
AT1G17810	6130024	6131627	+	0.210084	0.685163	0.874347	6131630	6131621	-9
AT1G17820	6131536	6135345	-	0.323529	0.0396369	0.123262	6131560	6131554	6
AT1G17830	6135750	6138500	-	0.452381	0.00816792	0.0348887	6135860	6135923	-63
AT1G17840	6142401	6146521	+	0.128076	0.00745813	0.0324144	6146115	6146058	-57
AT1G17850	6145925	6148940	-	0.146465	0.421227	0.656049	6146072	6146127	-55
AT1G17860	6149300	6150038	+	0.0662948	0.863313	0.982188	6150017	6150012	-5
AT1G17870	6149938	6152222	-	0.145833	0.618653	0.823454	6149949	6149960	-11
AT1G17880	6152383	6153982	-	0.0334674	0.446934	0.678792	6152416	6152449	-33
AT1G17890	6154263	6155804	-	0.145338	0.132004	0.301058	6154263	6154292	-29
AT1G17930	6166219	6168845	-	0.242475	0.41548	0.65022	6166296	6166299	-3
AT1G17940	6169284	6173273	-	0.105673	0.96985	1	6169373	6169348	25
AT1G17970	6184716	6187499	+	0.311457	0.0307356	0.101183	6187392	6187331	-61
AT1G17980	6187464	6191708	-	0.134574	0.217274	0.427858	6187519	6187529	-10
AT1G17990	6192032	6194093	-	0.0677847	0.808646	0.953586	6192115	6192082	33
AT1G18000	6194425	6196343	-	0.0551282	0.986276	1	6194668	6194647	21
AT1G18010	6199689	6201759	+	0.0508328	0.994696	1	6201358	6201379	21
AT1G18020	6202234	6204234	+	0.0826042	0.580531	0.792081	6203911	6203944	33
AT1G18030	6204258	6206988	+	0.237302	0.23499	0.450208	6206836	6206780	-56
AT1G18040	6206870	6209528	-	0.168333	0.844471	0.972576	6206945	6206890	55
AT1G18060	6211831	6213591	-	0.0887388	0.0227165	0.0798972	6211884	6211887	-3
AT1G18070	6213650	6218384	-	0.123416	0.0068578	0.030294	6213773	6213790	-17
AT1G18080	6222200	6224242	+	0.146943	3.52134e-17	1.80543e-15	6224029	6224008	-21
AT1G18090	6224404	6227822	+	0.26455	0.328156	0.560168	6227804	6227741	-63
AT1G18150	6244297	6247830	-	0.283613	7.27525e-05	0.000629834	6244400	6244418	-18
AT1G18160	6248618	6254080	+	0.207463	0.0188796	0.0689503	6254044	6254001	-43
AT1G18170	6254093	6255734	+	0.307875	3.65465e-07	5.21896e-06	6255694	6255595	-99
AT1G18190	6257850	6261501	-	0.233699	0.0917327	0.231833	6257844	6257853	-9
AT1G18210	6266608	6268939	-	0.141599	0.00566322	0.0258095	6268055	6268075	-20
AT1G18250	6276776	6278258	-	0.168695	0.30562	0.535205	6276771	6276899	-128
AT1G18260	6278787	6282144	-	0.100412	0.585667	0.796491	6278858	6278864	-6
AT1G18270	6283369	6293993	-	0.136335	0.419891	0.654552	6283477	6283478	-1
AT1G18300	6299668	6301139	+	0.463315	0.0039541	0.019295	6301067	6301039	-28
AT1G18320	6304359	6305689	+	0.0982906	0.990382	1	6305704	6305723	19
AT1G18330	6305813	6308243	-	0.109156	0.181387	0.377236	6305969	6306012	-43
AT1G18335	6308924	6311373	-	0.11646	0.992317	1	6308989	6308980	9
AT1G18340	6311442	6313931	-	0.13289	0.726745	0.900373	6311503	6311504	-1
AT1G18360	6316694	6319427	-	0.195544	0.0668857	0.182786	6316755	6316786	-31
AT1G18370	6319449	6324378	-	0.203297	0.911533	1	6319650	6319646	4
AT1G18390	6325535	6330179	+	0.225536	0.336665	0.569008	6330065	6330076	11
AT1G18400	6331397	6333856	+	0.0754383	0.790122	0.9421	6333750	6333749	-1
AT1G18440	6345973	6347918	+	0.111183	0.771314	0.929298	6347771	6347831	60
AT1G18450	6348047	6352010	+	0.0927607	0.465578	0.696265	6351959	6351933	-26
AT1G18460	6352324	6356113	+	0.393689	3.10754e-13	1.09515e-11	6356109	6356081	-28
AT1G18470	6355694	6360344	-	0.0613208	0.979182	1	6356167	6356153	14
AT1G18480	6361585	6363061	+	0.0651908	0.984987	1	6363004	6363023	19
AT1G18485	6363041	6366263	+	0.344444	0.0207164	0.0743096	6366230	6366203	-27
AT1G18490	6366519	6368879	+	0.244651	0.0694967	0.187982	6368751	6368740	-11
AT1G18500	6368965	6373080	+	0.159656	0.00945883	0.0394383	6373028	6373044	16
AT1G18540	6376638	6378580	-	0.213217	1.03781e-31	1.39788e-29	6377329	6377364	-35
AT1G18570	6389398	6391386	+	0.115196	0.883586	0.991787	6391272	6391283	11
AT1G18580	6395768	6398274	+	0.132796	0.624019	0.827893	6398057	6398197	140
AT1G18590	6398530	6400029	+	0.0752688	0.860619	0.981184	6399878	6399798	-80
AT1G18600	6400281	6402794	+	0.267335	0.00371683	0.0183239	6402796	6402721	-75
AT1G18610	6405606	6409532	+	0.28913	0.0446074	0.134892	6409292	6409197	-95
AT1G18620	6409654	6414569	+	0.123756	0.097008	0.241139	6414322	6414353	31
AT1G18630	6414608	6416459	+	0.144962	0.422154	0.656398	6416415	6416459	44
AT1G18640	6416168	6418693	-	0.246491	0.000720314	0.00458681	6416408	6416420	-12
AT1G18650	6418837	6421188	-	0.187496	8.30437e-05	0.00070592	6418867	6418958	-91
AT1G18660	6420855	6425898	+	0.0721584	0.923458	1	6425808	6425854	46
AT1G18670	6426708	6431093	-	0.305556	0.00891563	0.0375975	6426899	6427001	-102
AT1G18680	6431937	6433552	-	0.236314	0.156533	0.339926	6431980	6431985	-5
AT1G18690	6433516	6437236	+	0.196623	0.172894	0.364742	6434609	6436916	2307
AT1G18700	6437473	6444076	+	0.223529	0.0222053	0.0784119	6443212	6444067	855
AT1G18710	6450584	6453263	+	0.131297	0.316446	0.546873	6453117	6453098	-19
AT1G18720	6457774	6460405	-	0.0410084	0.948724	1	6457885	6457880	5
AT1G18730	6460402	6462344	+	0.255195	5.10041e-16	2.35657e-14	6462222	6462344	122
AT1G18740	6463921	6465476	+	0.178034	0.142232	0.317103	6465481	6465533	52
AT1G18750	6466666	6469984	+	0.166667	0.944753	1	6469952	6469752	-200
AT1G18773	6474801	6475979	+	0.217295	0.314398	0.544993	6475860	6475869	9
AT1G18800	6481112	6483646	-	0.151632	0.0339554	0.109293	6481248	6481131	117
AT1G18810	6485514	6487153	-	0.0950195	0.886877	0.993902	6485581	6485616	-35
AT1G18840	6500802	6504567	-	0.329181	5.13449e-05	0.000462628	6500807	6500860	-53
AT1G18850	6504676	6506542	-	0.152322	0.228606	0.44209	6504736	6504807	-71
AT1G18880	6520720	6523368	+	0.215269	0.283844	0.509846	6523372	6523310	-62
AT1G18890	6522763	6526075	-	0.131746	0.411757	0.646742	6523292	6523289	3
AT1G18900	6528983	6532697	+	0.479905	6.85417e-07	9.31112e-06	6532604	6532553	-51
AT1G18910	6532558	6538145	-	0.237458	0.442058	0.674498	6532560	6532639	-79
AT1G18950	6546176	6552108	+	0.252918	0.0177884	0.0657049	6551973	6551956	-17
AT1G18980	6557180	6558115	-	0.178723	0.822325	0.961739	6557360	6557238	122
AT1G19000	6560490	6562791	-	0.0841492	0.00165405	0.00931922	6560797	6560961	-164
AT1G19010	6565493	6567662	+	0.240053	0.359472	0.593346	6567525	6567511	-14
AT1G19020	6568001	6568705	+	0.190718	0.379458	0.614415	6568566	6568526	-40
AT1G19050	6577832	6579314	-	0.12	0.867519	0.98439	6577850	6577871	-21
AT1G19080	6584240	6586517	+	0.11487	0.861094	0.981522	6586421	6586422	1
AT1G19100	6594882	6601355	+	0.205029	0.349456	0.58268	6601337	6601348	11
AT1G19110	6602104	6606028	+	0.0550383	0.952809	1	6605909	6605896	-13
AT1G19120	6608114	6609369	+	0.0840615	0.654502	0.85149	6609339	6609347	8
AT1G19130	6609324	6610613	-	0.22005	0.00124193	0.00730812	6609344	6609362	-18
AT1G19140	6610651	6612609	-	0.241597	0.00568005	0.0258678	6610781	6610859	-78
AT1G19150	6612629	6613972	+	0.0320967	0.850983	0.975927	6613976	6613949	-27
AT1G19170	6616601	6619006	+	0.134615	0.681086	0.871182	6618945	6618957	12
AT1G19180	6621776	6623668	+	0.0687908	0.762072	0.923763	6623447	6623449	2
AT1G19220	6627682	6633133	-	0.152778	0.642339	0.842494	6628224	6628165	59
AT1G19240	6649242	6650446	-	0.111487	0.667306	0.860788	6649427	6649376	51
AT1G19270	6662416	6666032	+	0.187938	0.6926	0.878837	6666021	6666020	-1
AT1G19290	6666073	6669576	+	0.380878	0.0386527	0.12122	6669584	6669561	-23
AT1G19300	6671094	6672777	-	0.104743	0.955953	1	6671333	6671325	8
AT1G19310	6676209	6677680	-	0.0645733	0.969638	1	6676274	6676289	-15
AT1G19330	6680422	6683559	-	0.172213	0.367035	0.601097	6680627	6680576	51
AT1G19340	6684466	6687116	+	0.203297	0.911533	1	6686519	6686830	311
AT1G19350	6688462	6691216	+	0.204117	1.29302e-08	2.40929e-07	6690414	6690343	-71
AT1G19360	6690398	6692566	-	0.118394	0.173367	0.365402	6690500	6690514	-14
AT1G19370	6692723	6695055	-	0.153846	0.629997	0.832859	6692800	6692805	-5
AT1G19380	6697873	6698858	+	0.160294	0.500615	0.728653	6698791	6698784	-7
AT1G19396	6709777	6711788	+	0.106667	0.865367	0.983071	6711780	6710434	-1346
AT1G19397	6710850	6711787	+	0.17489	0.516783	0.742516	6711780	6711789	9
AT1G19400	6712021	6714483	-	0.0434073	0.882361	0.991042	6712081	6712118	-37
AT1G19430	6724412	6728075	-	0.120588	0.526446	0.750335	6724545	6724596	-51
AT1G19440	6728746	6730931	+	0.141316	0.467292	0.698039	6730806	6730897	91
AT1G19450	6731410	6735024	-	0.199478	0.000785576	0.00491573	6731472	6731526	-54
AT1G19480	6744352	6746635	+	0.472043	0.00132463	0.00773462	6746381	6746373	-8
AT1G19485	6746777	6751609	+	0.234921	0.156426	0.33979	6751515	6751550	35
AT1G19490	6751543	6754073	-	0.428571	0.0646929	0.178605	6751539	6751754	-215
AT1G19510	6756236	6757420	-	0.296066	0.242884	0.459627	6756317	6756343	-26
AT1G19520	6759858	6762847	+	0.218443	0.0291051	0.0968584	6762755	6762723	-32
AT1G19530	6763764	6765049	+	0.0837359	0.787856	0.94074	6764956	6764951	-5
AT1G19540	6765652	6768290	+	0.115936	0.88429	0.992228	6767320	6767324	4
AT1G19570	6773301	6774523	-	0.0183147	0.955557	1	6773329	6773330	-1
AT1G19580	6774682	6777568	+	0.116444	0.27651	0.500894	6777321	6777328	7
AT1G19600	6778886	6781222	+	0.0817441	0.360219	0.593975	6781067	6781081	14
AT1G19650	6796136	6799764	-	0.298737	0.00415115	0.0201012	6796154	6796275	-121
AT1G19660	6799968	6802906	-	0.0539622	0.302628	0.531841	6800011	6800084	-73
AT1G19670	6803485	6805092	-	0.0782799	0.0998061	0.245941	6803647	6803652	-5
AT1G19680	6805429	6807862	+	0.201142	0.00894541	0.0376931	6807857	6807811	-46
AT1G19690	6807714	6809642	-	0.153846	0.50048	0.728653	6807724	6807786	-62
AT1G19700	6809584	6813063	-	0.109843	0.534256	0.75643	6809760	6809738	22
AT1G19710	6814703	6816876	+	0.386364	0.000486399	0.00328971	6816846	6816736	-110
AT1G19715	6816701	6819542	-	0.123617	0.141409	0.315953	6816684	6816723	-39
AT1G19720	6819563	6822711	-	0.0834854	0.69347	0.8793	6819558	6816684	2874
AT1G19730	6822846	6824071	-	0.227969	0.0238824	0.0832794	6823007	6823002	5
AT1G19740	6824321	6825459	+	0.108052	0.00371126	0.0183075	6825329	6825432	103
AT1G19770	6832324	6833837	+	0.0426975	0.902655	1	6833863	6833868	5
AT1G19800	6846337	6848128	+	0.55568	5.52853e-21	3.63101e-19	6848095	6848047	-48
AT1G19835	6855898	6860563	-	0.148287	0.0493953	0.14594	6856101	6856125	-24
AT1G19840	6872274	6873358	-	0.176471	0.868025	0.984533	6872340	6872336	4
AT1G19850	6886668	6891404	+	0.368421	4.15277e-05	0.000382411	6891370	6891285	-85
AT1G19860	6891381	6894752	-	0.281342	0.00381802	0.0187469	6891493	6891546	-53
AT1G19870	6895008	6898818	-	0.371312	2.15917e-09	4.60025e-08	6895030	6895148	-118
AT1G19880	6900336	6904155	-	0.105072	0.653343	0.851027	6900482	6900440	42
AT1G19910	6913000	6914634	+	0.0604809	0.0318888	0.104206	6914466	6914452	-14
AT1G19920	6914517	6916823	-	0.105556	0.101203	0.24846	6914661	6914692	-31
AT1G19950	6924090	6926741	+	0.409091	0.0831194	0.215373	6926721	6926690	-31
AT1G19960	6927735	6928656	+	0.0842399	0.973582	1	6928465	6928446	-19
AT1G19970	6931011	6932826	-	0.552525	0.000118597	0.000958795	6931009	6931060	-51
AT1G19980	6933014	6935053	+	0.396078	0.122842	0.285949	6934982	6935003	21
AT1G19990	6935217	6936928	+	0.238266	0.073121	0.195391	6936784	6936831	47
AT1G20010	6937718	6940832	-	0.139083	4.2441e-05	0.000389692	6937827	6937874	-47
AT1G20020	6942624	6945091	+	0.0842676	0.000284577	0.00205875	6945010	6944996	-14
AT1G20030	6945424	6947344	+	0.184641	0.545599	0.765447	6947121	6947090	-31
AT1G20050	6949042	6950509	+	0.246027	2.81198e-09	5.91186e-08	6950319	6950292	-27
AT1G20070	6958009	6959123	-	0.0988497	0.748419	0.914742	6958026	6958034	-8
AT1G20090	6966841	6969009	+	0.153316	0.00700818	0.0308469	6968932	6968917	-15
AT1G20100	6969024	6971036	-	0.22029	1.97138e-06	2.46912e-05	6969188	6969216	-28
AT1G20110	6971423	6975130	+	0.189827	0.00126466	0.00742536	6974738	6974756	18
AT1G20140	6986311	6987863	+	0.185439	0.211989	0.42117	6987270	6987224	-46
AT1G20160	6990641	6993989	-	0.0983051	0.956733	1	6990799	6990797	2
AT1G20190	6998334	6999839	-	0.132756	0.2442	0.461173	6998484	6998532	-48
AT1G20200	7001086	7004432	-	0.126862	0.0175447	0.0650301	7001226	7001220	6
AT1G20220	7004823	7007717	-	0.154731	0.00532662	0.024618	7004898	7004920	-22
AT1G20225	7007755	7009380	-	0.36203	1.37825e-13	5.10627e-12	7007774	7007823	-49
AT1G20260	7016598	7020690	+	0.13073	9.6899e-05	0.000808034	7020548	7020508	-40
AT1G20270	7020663	7023162	-	0.110182	0.898359	0.998568	7020749	7020750	-1
AT1G20300	7029628	7031535	+	0.164286	0.756797	0.920068	7031430	7031439	9
AT1G20330	7038526	7040231	-	0.0759652	0.0491813	0.145484	7038750	7038840	-90
AT1G20340	7042045	7043392	-	0.0908481	1.0286e-96	9.08251e-94	7042601	7042637	-36
AT1G20370	7051576	7053745	-	0.260606	0.0225704	0.0794713	7051618	7051658	-40
AT1G20410	7078803	7082566	-	0.294918	0.0926014	0.233324	7078878	7078895	-17
AT1G20430	7083011	7083910	-	0.168067	0.00313235	0.0159416	7083272	7083332	-60
AT1G20440	7084408	7086873	-	0.0308252	0.770994	0.929155	7084593	7084554	39
AT1G20450	7087902	7089606	-	0.0294707	0.970636	1	7088066	7088072	-6
AT1G20460	7090940	7093442	+	0.259259	0.029972	0.0991308	7093428	7093325	-103
AT1G20470	7094259	7094869	+	0.101852	0.99666	1	7094835	7094882	47
AT1G20510	7103361	7106121	-	0.0663238	0.8543	0.977767	7103481	7103556	-75
AT1G20540	7112610	7115362	+	0.223392	0.0164695	0.0618502	7115365	7115349	-16
AT1G20560	7119670	7121871	-	0.107951	0.68925	0.87684	7119754	7119762	-8
AT1G20575	7126746	7128762	-	0.0966777	0.845386	0.972888	7126826	7126793	33
AT1G20580	7128866	7130799	+	0.180131	0.000355808	0.00249568	7130583	7130577	-6
AT1G20610	7134658	7137828	-	0.151515	0.988512	1	7134921	7134859	62
AT1G20620	7142971	7146540	+	0.0181776	0.103889	0.253099	7146433	7146419	-14
AT1G20630	7146635	7150180	+	0.397459	2.17012e-12	6.91219e-11	7149813	7149782	-31
AT1G20640	7154409	7158287	+	0.226503	0.0764912	0.202385	7158284	7158212	-72
AT1G20650	7157825	7160590	-	0.147	0.00748264	0.0324943	7158240	7158267	-27
AT1G20670	7164081	7168041	-	0.228142	0.0543165	0.156311	7164250	7164195	55
AT1G20693	7176746	7178895	+	0.0527099	0.066189	0.181593	7178719	7178707	-12
AT1G20696	7179272	7181574	+	0.131504	3.49698e-05	0.000327718	7181414	7181432	18
AT1G20760	7209297	7214993	+	0.130761	0.191291	0.3916	7214979	7214970	-9
AT1G20770	7215009	7216897	-	0.409651	8.99445e-08	1.43244e-06	7215058	7215104	-46
AT1G20780	7217020	7220842	+	0.225727	0.234301	0.449322	7220733	7220772	39
AT1G20810	7231980	7233657	+	0.311773	6.04528e-09	1.20406e-07	7233552	7233537	-15
AT1G20816	7233653	7235128	+	0.177381	0.240096	0.456197	7235025	7235044	19
AT1G20823	7238692	7239698	+	0.210826	0.43076	0.663984	7239618	7239610	-8
AT1G20830	7242895	7244978	+	0.144444	0.357525	0.591558	7244822	7244845	23
AT1G20840	7244938	7248494	-	0.143222	0.580478	0.792078	7244944	7244945	-1
AT1G20850	7252110	7253747	+	0.0519796	0.962676	1	7253663	7253651	-12
AT1G20880	7262008	7265555	-	0.0968296	0.870497	0.98548	7262091	7262170	-79
AT1G20890	7265793	7267377	-	0.291935	0.00847196	0.0360036	7265904	7265970	-66
AT1G20900	7272555	7274072	+	0.187857	0.278601	0.503248	7274065	7274076	11
AT1G20910	7276942	7281236	-	0.128558	0.715576	0.894713	7276939	7276961	-22
AT1G20920	7285041	7289943	+	0.281616	0.00105595	0.00637664	7289781	7289752	-29
AT1G20930	7292388	7294746	-	0.1875	0.912292	1	7292573	7292575	-2
AT1G20950	7297238	7301633	-	0.200431	0.00326691	0.0165311	7297301	7297314	-13
AT1G20960	7301598	7310271	-	0.14166	0.00816573	0.0348887	7301777	7301746	31
AT1G20970	7313900	7319921	+	0.368726	6.26945e-08	1.02728e-06	7319513	7319275	-238
AT1G20980	7324470	7329441	+	0.0666196	0.764579	0.92546	7329345	7329386	41
AT1G21000	7337604	7339452	+	0.128321	0.00615598	0.0276081	7339437	7339223	-214
AT1G21010	7346155	7347283	+	0.181385	0.377702	0.612259	7347018	7346960	-58
AT1G21050	7366589	7368203	+	0.0262855	0.997616	1	7367679	7367662	-17
AT1G21060	7371656	7374114	+	0.0800677	0.796933	0.945991	7374654	7375747	1093
AT1G21065	7374114	7375789	+	0.130539	3.27057e-06	3.88509e-05	7375780	7375747	-33
AT1G21070	7375868	7378227	-	0.189718	0.421623	0.656353	7375965	7375969	-4
AT1G21080	7378537	7382661	-	0.106377	0.290862	0.518054	7378586	7378656	-70
AT1G21090	7384559	7386580	+	0.435612	0.0014941	0.00856375	7386269	7386407	138
AT1G21100	7386761	7388512	-	0.091222	0.59094	0.800853	7386835	7386836	-1
AT1G21110	7389980	7391603	-	0.117216	0.997724	1	7389992	7389991	1
AT1G21130	7398813	7400736	-	0.0303625	0.951453	1	7399111	7399065	46
AT1G21160	7407930	7413295	-	0.268525	0.0306407	0.100933	7412833	7411831	1002
AT1G21170	7412829	7419643	+	0.324324	0.0312214	0.102464	7419586	7419633	47
AT1G21190	7419663	7420957	-	0.142308	0.0611374	0.170776	7419802	7419836	-34
AT1G21200	7421147	7423673	+	0.152636	0.770632	0.928966	7423212	7423123	-89
AT1G21250	7439170	7442113	+	0.179053	0.702966	0.885835	7441896	7442006	110
AT1G21270	7444748	7448483	+	0.165286	0.0227333	0.0799389	7447473	7447415	-58
AT1G21280	7447489	7448483	-	0.166667	0.556095	0.773788	7447541	7447530	11
AT1G21310	7453244	7455009	-	0.0396041	0.738847	0.90913	7453265	7453274	-9
AT1G21350	7476901	7479258	-	0.0400382	0.998541	1	7476946	7476917	29
AT1G21370	7483780	7485666	+	0.186996	0.363569	0.597329	7485668	7485509	-159
AT1G21380	7485635	7488780	-	0.180328	0.0290333	0.0966802	7485657	7485693	-36
AT1G21390	7489045	7490803	-	0.22	0.411014	0.646016	7489132	7489151	-19
AT1G21400	7493212	7496741	+	0.085053	0.060813	0.170057	7496354	7496373	19
AT1G21410	7496997	7499616	+	0.208101	0.0256103	0.0878778	7499616	7499553	-63
AT1G21440	7502081	7504275	-	0.204049	0.0046541	0.022009	7502168	7502175	-7
AT1G21450	7508700	7511801	+	0.142321	0.248165	0.466119	7511722	7511721	-1
AT1G21460	7511749	7513481	-	0.245703	0.0683211	0.185718	7511854	7511879	-25
AT1G21480	7518945	7521552	-	0.330705	0.00925117	0.0387452	7518992	7519035	-43
AT1G21500	7529704	7531108	-	0.155123	2.65277e-24	2.20749e-22	7529928	7529970	-42
AT1G21520	7534018	7534927	-	0.100654	0.933654	1	7534336	7534270	66
AT1G21540	7548449	7550741	-	0.185771	0.789955	0.941973	7548593	7548591	2
AT1G21560	7554670	7557112	+	0.365352	0.000517967	0.00346634	7556968	7556952	-16
AT1G21580	7557139	7565914	-	0.220455	0.0828035	0.21487	7557242	7557705	-463
AT1G21590	7566228	7570014	-	0.186394	0.000127462	0.00102111	7566228	7566489	-261
AT1G21600	7570844	7573847	-	0.278386	4.20712e-08	7.17467e-07	7571158	7571198	-40
AT1G21610	7573829	7578963	+	0.213333	0.113136	0.268757	7578925	7578884	-41
AT1G21630	7581007	7588153	+	0.384108	2.9076e-14	1.14959e-12	7588150	7587956	-194
AT1G21640	7588413	7592890	+	0.0869896	0.517749	0.743302	7592829	7592818	-11
AT1G21650	7592663	7604229	-	0.180426	0.481532	0.711216	7592672	7592813	-141
AT1G21651	7600804	7604215	-	0.25	0.59143	0.801175	7601755	7600885	870
AT1G21660	7605619	7609223	+	0.154143	0.316771	0.547296	7609064	7609137	73
AT1G21670	7610240	7612721	+	0.0721705	0.903467	1	7612551	7612565	14
AT1G21680	7612833	7615374	+	0.110416	0.0301635	0.0995883	7615276	7615255	-21
AT1G21690	7615504	7618628	+	0.179918	0.0553178	0.158304	7618487	7618526	39
AT1G21700	7620000	7624166	-	0.244485	0.00429966	0.020651	7619979	7620072	-93
AT1G21710	7624319	7626138	+	0.291653	0.0149759	0.0573835	7626103	7626092	-11
AT1G21720	7626181	7628290	+	0.134675	0.00288661	0.0148622	7628229	7628169	-60
AT1G21730	7630106	7636658	+	0.157143	0.618764	0.823533	7636562	7636570	8
AT1G21740	7640905	7645240	+	0.311111	0.340932	0.573294	7645160	7645182	22
AT1G21750	7645609	7648855	+	0.0919186	0.0948723	0.237539	7648778	7648764	-14
AT1G21760	7649193	7651816	+	0.132035	0.129712	0.296963	7651814	7651773	-41
AT1G21770	7651645	7652288	-	0.060267	0.50501	0.732357	7651760	7651653	107
AT1G21780	7651881	7654014	+	0.128863	0.228106	0.441813	7654006	7654014	8
AT1G21790	7654087	7655981	+	0.215241	0.196555	0.398978	7655869	7655877	8
AT1G21830	7660946	7662725	-	0.132783	0.000492702	0.0033281	7661120	7661261	-141
AT1G21840	7666413	7667794	+	0.271491	0.0142944	0.0552381	7667735	7667681	-54
AT1G21880	7680389	7682641	+	0.0817337	0.88037	0.989773	7682621	7682597	-24
AT1G21900	7690801	7692459	-	0.152704	0.0352572	0.112661	7690924	7690906	18
AT1G21910	7696426	7697831	+	0.130552	0.686051	0.875127	7697515	7697520	5
AT1G21920	7704172	7706254	-	0.150879	0.0123585	0.0491189	7704291	7704251	40
AT1G21930	7712818	7714459	+	0.064457	0.887045	0.993915	7714426	7714437	11
AT1G21980	7734660	7738772	+	0.108488	0.223331	0.4355	7738662	7738548	-114
AT1G22020	7754280	7758029	+	0.0863095	0.851188	0.975961	7757349	7757345	-4
AT1G22030	7759076	7760929	-	0.184615	0.866754	0.983926	7759165	7760171	-1006
AT1G22040	7767923	7770216	+	0.446442	3.57506e-05	0.000334641	7770050	7770009	-41
AT1G22050	7771658	7773154	+	0.264069	0.0367	0.116165	7773158	7773121	-37
AT1G22060	7773062	7781539	-	0.338095	2.16437e-07	3.24228e-06	7773075	7773145	-70
AT1G22065	7785707	7786477	+	0.151515	0.93236	1	7786286	7786240	-46
AT1G22070	7789132	7792139	+	0.344412	1.18082e-05	0.000123963	7792104	7792064	-40
AT1G22140	7814662	7815722	-	0.152952	0.00211372	0.0114856	7814767	7814809	-42
AT1G22160	7823065	7823971	+	0.24372	0.00390984	0.0191327	7823954	7823857	-97
AT1G22170	7826267	7828326	+	0.1829	0.645768	0.845039	7828331	7828254	-77
AT1G22180	7828325	7830424	-	0.151786	0.852022	0.976495	7828406	7828323	83
AT1G22190	7835780	7837411	+	0.278238	0.000997882	0.00607443	7837283	7837150	-133
AT1G22200	7837562	7840898	-	0.0968013	0.570023	0.783935	7837594	7837625	-31
AT1G22250	7858863	7859766	+	0.228833	0.587967	0.798526	7859730	7859735	5
AT1G22270	7865434	7866176	+	0.0616046	0.562168	0.778251	7866100	7866021	-79
AT1G22280	7873866	7876018	+	0.110161	0.327244	0.55939	7875795	7875837	42
AT1G22300	7878758	7881395	-	0.207114	1.55554e-16	7.58399e-15	7878875	7878889	-14
AT1G22310	7881502	7883824	-	0.34375	0.0343169	0.110189	7881542	7881566	-24
AT1G22330	7886322	7889534	+	0.221248	0.196727	0.399129	7889387	7889451	64
AT1G22360	7894806	7897761	-	0.0843299	0.861289	0.981525	7894927	7894917	10
AT1G22370	7897914	7900335	-	0.168831	0.949349	1	7898007	7898003	4
AT1G22400	7903659	7906969	-	0.130435	0.643078	0.842837	7903738	7903777	-39
AT1G22410	7911842	7915004	+	0.177234	9.01746e-07	1.20744e-05	7914905	7914830	-75
AT1G22430	7919076	7921893	+	0.192941	0.000229731	0.00171023	7921803	7921839	36
AT1G22440	7922275	7925097	+	0.386243	0.0955486	0.238698	7924870	7924994	124
AT1G22450	7925120	7927345	+	0.249679	2.29308e-09	4.8595e-08	7927094	7927067	-27
AT1G22500	7949475	7950900	+	0.288889	0.01032	0.0422204	7950863	7950892	29
AT1G22510	7950817	7952832	-	0.366667	0.0258563	0.0884735	7950820	7950875	-55
AT1G22520	7952973	7954546	-	0.117749	0.400565	0.635133	7953076	7953064	12
AT1G22530	7955444	7958564	-	0.0709436	0.338073	0.570418	7955568	7955549	19
AT1G22540	7963812	7966436	+	0.107752	0.980532	1	7966530	7966484	-46
AT1G22550	7966499	7968692	-	0.162162	0.69219	0.878658	7966501	7966540	-39
AT1G22570	7976423	7978810	-	0.149784	0.855673	0.978644	7976495	7976463	32
AT1G22590	7981721	7984334	+	0.0924556	0.520164	0.745827	7984233	7984197	-36
AT1G22610	7994261	7997588	+	0.0580047	0.851481	0.976086	7997711	7997693	-18
AT1G22620	7994165	8002989	-	0.136905	0.39166	0.627127	7997682	7997680	2
AT1G22630	8003222	8004304	+	0.0508475	0.608473	0.815091	8004294	8004297	3
AT1G22640	8006063	8007465	+	0.11166	0.112056	0.26678	8007390	8007342	-48
AT1G22650	8013352	8016150	-	0.206076	0.415574	0.650303	8013405	8015792	-2387
AT1G22660	8017280	8021930	+	0.17849	0.707523	0.889243	8021715	8021623	-92
AT1G22690	8027125	8028168	+	0.0356029	0.767907	0.927229	8028126	8028124	-2
AT1G22700	8028157	8030136	-	0.203052	7.09942e-08	1.15376e-06	8028163	8028199	-36
AT1G22710	8030586	8033156	-	0.0805034	0.0715073	0.191821	8030718	8030723	-5
AT1G22730	8046072	8049039	+	0.167727	0.224985	0.437903	8049005	8049007	2
AT1G22740	8049089	8050784	+	0.236407	0.0209499	0.0749613	8050704	8050599	-105
AT1G22750	8050769	8052930	+	0.123627	0.068139	0.185445	8052873	8052846	-27
AT1G22770	8061750	8067790	+	0.132576	0.410565	0.645516	8067661	8067668	7
AT1G22780	8067863	8069356	+	0.123434	4.68021e-06	5.39821e-05	8069316	8069250	-66
AT1G22790	8069376	8071593	+	0.256518	0.00610379	0.0274282	8071439	8071378	-61
AT1G22800	8071788	8074357	+	0.246377	0.146727	0.324667	8074279	8074260	-19
AT1G22840	8079286	8080574	+	0.0712857	0.06988	0.188601	8080451	8080464	13
AT1G22850	8080481	8082882	-	0.0968903	0.00438411	0.0209693	8080547	8080544	3
AT1G22860	8083183	8089273	+	0.227451	0.337926	0.57029	8089225	8089228	3
AT1G22870	8089266	8094505	+	0.153317	0.705941	0.888098	8094436	8094440	4
AT1G22882	8098391	8101464	+	0.158333	0.29034	0.517313	8101277	8101286	9
AT1G22885	8101423	8102500	+	0.111136	0.0763552	0.202243	8102280	8102402	122
AT1G22890	8102727	8103588	+	0.0321195	0.99603	1	8103487	8103509	22
AT1G22910	8104992	8108361	+	0.233438	0.00261809	0.0136971	8108168	8108133	-35
AT1G22920	8109573	8112061	-	0.104069	0.502248	0.729875	8109717	8109733	-16
AT1G22930	8117285	8122151	+	0.23023	2.31426e-05	0.000226775	8122126	8122111	-15
AT1G22940	8122338	8125068	+	0.273746	0.0106401	0.0433071	8125053	8125038	-15
AT1G22950	8125022	8127286	-	0.182477	0.189576	0.389241	8125022	8125040	-18
AT1G22960	8127441	8130456	-	0.326667	0.0855955	0.220245	8127645	8127436	209
AT1G22970	8130597	8132435	-	0.092538	0.817071	0.958203	8130745	8130725	20
AT1G22985	8135179	8136034	-	0.262703	0.216808	0.427484	8135211	8135214	-3
AT1G22990	8139113	8140233	+	0.214286	0.775484	0.932268	8140122	8140200	78
AT1G23000	8143226	8145174	+	0.105128	0.987927	1	8145005	8145170	165
AT1G23010	8147117	8149891	+	0.309211	0.315439	0.545786	8149935	8149716	-219
AT1G23020	8149867	8153796	-	0.425483	2.44633e-08	4.36385e-07	8150087	8150130	-43
AT1G23030	8156503	8159185	+	0.149137	0.279482	0.504438	8159079	8159059	-20
AT1G23040	8164781	8166716	+	0.213879	0.00800934	0.0343498	8165696	8165611	-85
AT1G23050	8168442	8169267	+	0.194444	0.598915	0.807666	8169226	8169248	22
AT1G23080	8180188	8183650	-	0.22178	1.52377e-16	7.45195e-15	8180437	8180619	-182
AT1G23090	8184924	8189234	-	0.135357	0.845245	0.972797	8185094	8185130	-36
AT1G23100	8195775	8196475	+	0.0877193	0.975004	1	8196458	8196473	15
AT1G23120	8198585	8199616	+	0.346154	0.0805894	0.210396	8199414	8199416	2
AT1G23130	8200320	8201246	+	0.0276961	0.134882	0.305691	8201162	8201130	-32
AT1G23170	8212555	8215807	+	0.2	0.912278	1	8215841	8215811	-30
AT1G23180	8215720	8219641	+	0.179825	0.230168	0.444074	8219625	8219615	-10
AT1G23190	8219807	8224547	+	0.0664414	0.489566	0.718747	8224388	8224390	2
AT1G23200	8227132	8229661	+	0.287356	0.329875	0.562063	8229503	8229556	53
AT1G23205	8233952	8235019	-	0.170045	0.541257	0.761238	8233979	8233999	-20
AT1G23220	8242368	8244403	+	0.167105	0.0502225	0.147385	8244313	8244268	-45
AT1G23230	8244417	8251937	+	0.2	0.246631	0.464505	8251910	8251913	3
AT1G23260	8256853	8258725	-	0.0785535	0.55544	0.773585	8257043	8257046	-3
AT1G23280	8260607	8262795	-	0.134786	0.232622	0.447127	8260700	8260710	-10
AT1G23290	8262924	8263739	+	0.0444991	0.0316755	0.103655	8263552	8263550	-2
AT1G23310	8268384	8272021	-	0.133315	1.71134e-78	1.13333e-75	8268628	8268622	6
AT1G23330	8279553	8282421	-	0.140302	0.69992	0.883952	8279695	8279683	12
AT1G23340	8283643	8286969	-	0.151515	0.724548	0.899123	8283965	8283912	53
AT1G23360	8295077	8296941	-	0.154369	0.269581	0.491763	8295237	8295240	-3
AT1G23380	8297240	8302651	-	0.335268	0.0191188	0.069696	8297290	8297308	-18
AT1G23390	8308964	8310916	-	0.0540074	0.453224	0.685204	8309311	8309296	15
AT1G23400	8311983	8315876	-	0.365621	8.21712e-11	2.13404e-09	8312099	8312122	-23
AT1G23410	8314852	8315737	+	0.261905	0.152751	0.334181	8315547	8315507	-40
AT1G23440	8321610	8324497	+	0.115636	0.127743	0.293869	8324230	8324232	2
AT1G23460	8326746	8329782	+	0.201613	0.496492	0.725431	8329748	8329784	36
AT1G23480	8332861	8336414	+	0.0968265	0.869081	0.984913	8336269	8336329	60
AT1G23490	8336592	8338827	+	0.0369194	0.323623	0.554693	8338575	8338602	27
AT1G23550	8350727	8352791	+	0.277778	0.381863	0.617053	8352780	8352786	6
AT1G23710	8385187	8386522	+	0.0991228	0.922994	1	8386283	8386494	211
AT1G23730	8395465	8398387	+	0.0899621	0.998925	1	8398140	8398145	5
AT1G23740	8398114	8399836	-	0.030912	0.614073	0.819554	8398145	8398141	4
AT1G23750	8400055	8401550	+	0.177305	0.345856	0.57899	8401416	8401410	-6
AT1G23780	8406662	8408530	-	0.0839372	0.639058	0.839507	8406794	8406817	-23
AT1G23800	8412050	8414886	-	0.292765	0.0675883	0.184389	8412052	8412064	-12
AT1G23820	8420264	8422985	+	0.124499	0.0033483	0.0168411	8422936	8422860	-76
AT1G23830	8422959	8424088	-	0.25	0.522387	0.747415	8422929	8422956	-27
AT1G23850	8425723	8427235	-	0.192308	0.889362	0.994824	8425796	8425808	-12
AT1G23860	8427256	8429498	-	0.290969	4.30043e-09	8.76296e-08	8427821	8427908	-87
AT1G23870	8432178	8435656	+	0.0892333	0.529299	0.752677	8435651	8435780	129
AT1G23880	8435656	8438811	+	0.312399	0.14314	0.31886	8435780	8435782	2
AT1G23890	8438765	8440866	-	0.287302	0.0943424	0.236735	8438795	8438813	-18
AT1G23900	8441072	8447681	+	0.252572	0.00116467	0.00693565	8447520	8447512	-8
AT1G23950	8469532	8471417	-	0.0970688	0.611627	0.817735	8469576	8469553	23
AT1G23960	8478390	8480356	-	0.117139	0.0662481	0.181652	8478436	8478457	-21
AT1G23970	8481996	8483875	-	0.45125	1.17222e-05	0.000123141	8482029	8482049	-20
AT1G23980	8484702	8486002	-	0.266667	0.588614	0.798617	8485183	8484701	482
AT1G24020	8500118	8502065	-	0.0319097	0.999353	1	8500560	8500569	-9
AT1G24040	8503776	8506813	-	0.133562	0.434812	0.666882	8503779	8503800	-21
AT1G24050	8506967	8508909	+	0.123913	0.0198214	0.0717472	8508842	8508769	-73
AT1G24070	8516165	8519984	-	0.310606	0.267706	0.489916	8516262	8516257	5
AT1G24095	8523224	8524929	+	0.277778	0.425472	0.659424	8524904	8524882	-22
AT1G24100	8525333	8527087	-	0.0509874	0.987204	1	8525478	8525441	37
AT1G24120	8529063	8532262	-	0.136792	0.617494	0.822779	8529139	8529239	-100
AT1G24145	8540837	8542053	+	0.101079	0.854624	0.978067	8541739	8541734	-5
AT1G24147	8542211	8543545	+	0.0877346	0.778681	0.934741	8543415	8543421	6
AT1G24148	8544247	8545590	+	0.174252	0.000774913	0.00486718	8545552	8545432	-120
AT1G24150	8549190	8552086	+	0.236842	0.583531	0.794484	8552068	8552028	-40
AT1G24160	8553312	8556750	-	0.213625	0.000348623	0.00245069	8553417	8553436	-19
AT1G24170	8557214	8559066	-	0.131102	0.246672	0.464527	8557247	8557296	-49
AT1G24180	8560419	8563502	-	0.293129	6.24747e-06	6.97313e-05	8560577	8560613	-36
AT1G24190	8563509	8570580	-	0.0916219	0.793877	0.944278	8563529	8563536	-7
AT1G24240	8586334	8588180	+	0.247863	0.0643697	0.177867	8588084	8588180	96
AT1G24260	8593535	8596123	-	0.305556	0.207845	0.415383	8593646	8593639	7
AT1G24265	8600390	8603913	+	0.316364	0.359232	0.593147	8603784	8603777	-7
AT1G24267	8604021	8607484	-	0.182809	0.0139779	0.054213	8604110	8604124	-14
AT1G24280	8609337	8612580	+	0.190476	0.915824	1	8612573	8612580	7
AT1G24290	8612504	8614277	-	0.164286	0.921632	1	8612530	8612549	-19
AT1G24300	8614362	8620664	-	0.0705882	0.989303	1	8614376	8614374	2
AT1G24310	8624013	8626405	+	0.292722	0.000871514	0.00537727	8626357	8626358	1
AT1G24340	8635186	8638986	+	0.179198	0.337448	0.569816	8639003	8638941	-62
AT1G24350	8638519	8640825	-	0.238636	0.0190715	0.0695554	8638878	8638911	-33
AT1G24360	8640581	8643503	+	0.117819	0.00210943	0.0114741	8643462	8643432	-30
AT1G24400	8651406	8653915	-	0.285486	0.234711	0.449837	8651423	8651408	15
AT1G24440	8661837	8664007	+	0.150228	0.335466	0.567888	8663965	8663961	-4
AT1G24450	8664096	8665569	+	0.175788	0.107264	0.259096	8665173	8665124	-49
AT1G24460	8665873	8672651	+	0.191432	0.0686023	0.186324	8672525	8672654	129
AT1G24490	8682194	8685271	+	0.352564	2.15536e-07	3.23487e-06	8685275	8685235	-40
AT1G24510	8685270	8688247	-	0.0911997	0.0167618	0.0626851	8685357	8685312	45
AT1G24530	8693226	8694705	+	0.0892985	0.947377	1	8694632	8694677	45
AT1G24560	8702360	8705879	+	0.135969	0.443918	0.676244	8705830	8705793	-37
AT1G24575	8710846	8711578	-	0.285201	0.0860271	0.220998	8711033	8711060	-27
AT1G24577	8712477	8713225	-	0.28483	0.0886867	0.226113	8712618	8712626	-8
AT1G24610	8720650	8722825	-	0.148643	0.207002	0.414359	8720769	8720817	-48
AT1G24625	8725788	8727212	-	0.152963	0.218336	0.429271	8725904	8725887	17
AT1G24706	8741835	8755604	+	0.112346	0.629	0.831872	8755449	8755437	-12
AT1G24764	8759532	8763469	-	0.206539	0.128703	0.295355	8759800	8759532	268
AT1G24793	8767561	8769571	+	0.220787	0.000527298	0.00352286	8769356	8769342	-14
AT1G24800	8769510	8771553	+	0.180422	4.66004e-10	1.09243e-08	8771193	8771248	55
AT1G24807	8771369	8773535	-	0.339827	0.163999	0.351626	8771693	8771695	-2
AT1G24851	8778279	8780257	+	0.238095	0.408342	0.642911	8779537	8779405	-132
AT1G24880	8775900	8778072	+	0.11298	7.6028e-15	3.17997e-13	8777439	8777990	551
AT1G24881	8784035	8785634	+	0.178971	6.6488e-10	1.52932e-08	8785572	8785627	55
AT1G24909	8785784	8787914	-	0.339827	0.163999	0.351626	8786072	8786074	-2
AT1G25054	8804488	8806361	+	0.219878	0.00045382	0.00309438	8806264	8806250	-14
AT1G25055	8806606	8808156	+	0.180422	4.66004e-10	1.09243e-08	8808101	8808156	55
AT1G25083	8808548	8810443	-	0.339827	0.163999	0.351626	8808601	8808603	-2
AT1G25145	8818866	8820736	+	0.219878	0.00045382	0.00309438	8820642	8820628	-14
AT1G25150	8821007	8822843	+	0.180422	4.66004e-10	1.09243e-08	8822479	8822534	55
AT1G25155	8822691	8824821	-	0.339827	0.163999	0.351626	8822979	8822981	-2
AT1G25180	8829563	8831390	+	0.238095	0.408342	0.642911	8830821	8830689	-132
AT1G25210	8833244	8835235	+	0.219878	0.00045382	0.00309438	8835020	8835006	-14
AT1G25211	8835385	8837007	+	0.183648	2.16944e-10	5.36254e-09	8836857	8836912	55
AT1G25220	8836834	8839609	-	0.271919	7.30185e-05	0.00063141	8837251	8837308	-57
AT1G25230	8840202	8842445	-	0.0697134	0.7025	0.88553	8840449	8840453	-4
AT1G25260	8853533	8855874	-	0.204864	2.41411e-07	3.58262e-06	8853971	8854043	-72
AT1G25275	8860526	8861522	+	0.0453352	0.230911	0.444945	8861306	8861327	21
AT1G25277	8861733	8862797	+	0.231092	0.748746	0.914795	8862682	8862691	9
AT1G25280	8863767	8866894	+	0.173113	0.0342573	0.110042	8866792	8866746	-46
AT1G25290	8867023	8869289	+	0.203596	0.137181	0.309064	8869120	8869092	-28
AT1G25320	8877789	8880388	+	0.25	0.39535	0.630449	8880358	8880311	-47
AT1G25350	8889017	8894306	-	0.214658	0.000663381	0.00428609	8889135	8889103	32
AT1G25370	8897563	8899111	-	0.482906	0.0387941	0.121472	8897760	8898833	-1073
AT1G25375	8900109	8903428	-	0.252137	0.448666	0.680124	8900149	8900213	-64
AT1G25380	8903404	8906455	+	0.662886	1.34572e-13	5.00911e-12	8906003	8905971	-32
AT1G25390	8906028	8909334	-	0.177358	0.615381	0.82075	8906431	8906446	-15
AT1G25420	8915914	8918267	+	0.242857	0.00106676	0.00643947	8918236	8918053	-183
AT1G25425	8922415	8923879	+	0.128485	0.578516	0.790554	8923248	8923222	-26
AT1G25440	8933715	8935544	-	0.0274832	0.994174	1	8933738	8933717	21
AT1G25450	8938386	8940613	-	0.106838	0.634881	0.83629	8938477	8938479	-2
AT1G25470	8944608	8946628	-	0.238299	0.0198075	0.0717226	8944611	8944632	-21
AT1G25480	8948231	8951031	+	0.285544	0.157429	0.341267	8951088	8951052	-36
AT1G25490	8951161	8955160	+	0.0447368	0.865998	0.983507	8955044	8955034	-10
AT1G25500	8955194	8958132	-	0.222222	0.741236	0.910449	8955245	8955243	2
AT1G25510	8959086	8961183	-	0.230645	0.481968	0.71147	8959170	8959284	-114
AT1G25520	8962086	8964564	+	0.183463	0.127138	0.292835	8964467	8964460	-7
AT1G25530	8964543	8967562	-	0.169654	0.760813	0.92287	8964694	8966469	-1775
AT1G25540	8969064	8974815	-	0.0947053	0.895117	0.997615	8969163	8969160	3
AT1G25550	8976325	8978305	+	0.0236642	0.999934	1	8978084	8978094	10
AT1G25560	8981555	8983314	-	0.0852209	0.061979	0.172642	8981679	8981760	-81
AT1G25570	8991707	8995617	-	0.226323	0.0264049	0.0899442	8991824	8991919	-95
AT1G25580	8996713	8999917	-	0.156593	0.78384	0.938144	8996869	8996871	-2
AT1G25682	9002284	9004762	-	0.0724902	0.889807	0.99487	9002471	9002387	84
AT1G26090	9020379	9022769	+	0.393939	0.0264578	0.0900472	9022764	9022719	-45
AT1G26100	9022541	9024081	-	0.304828	0.133893	0.304213	9022623	9022539	84
AT1G26110	9024340	9027955	-	0.103113	0.00454623	0.0216146	9024346	9024369	-23
AT1G26120	9028375	9032327	-	0.092619	0.934953	1	9028410	9028406	4
AT1G26130	9033015	9039099	+	0.293333	0.157513	0.341358	9038513	9038632	119
AT1G26150	9039627	9043855	-	0.326556	1.91879e-05	0.000191686	9039708	9039746	-38
AT1G26160	9044421	9047049	-	0.0847638	0.867084	0.984107	9044591	9044538	53
AT1G26170	9047291	9054703	-	0.205007	0.133802	0.304155	9047394	9047391	3
AT1G26180	9054672	9056941	+	0.155986	0.108261	0.260632	9056847	9056851	4
AT1G26190	9057094	9061140	-	0.176471	0.621292	0.825654	9057087	9057101	-14
AT1G26210	9067038	9068207	+	0.175152	0.115767	0.273241	9068204	9068203	-1
AT1G26220	9071139	9071861	+	0.0465686	0.998262	1	9071864	9071853	-11
AT1G26230	9072255	9075350	-	0.0842912	0.984864	1	9072244	9072271	-27
AT1G26260	9086803	9089375	+	0.213675	0.834952	0.96754	9089264	9089306	42
AT1G26270	9089468	9092560	-	0.0566704	0.984536	1	9089534	9089533	1
AT1G26300	9095767	9099766	-	0.269963	0.00721525	0.0315143	9095832	9095896	-64
AT1G26340	9113863	9114977	+	0.156499	0.337193	0.569659	9114955	9114973	18
AT1G26370	9121442	9125578	-	0.206667	0.234119	0.449135	9121588	9121489	99
AT1G26440	9143936	9146106	-	0.20529	0.310998	0.541046	9143986	9144007	-21
AT1G26450	9148635	9150250	-	0.137393	0.703323	0.885945	9148727	9148724	3
AT1G26460	9151627	9154762	+	0.279447	0.000420628	0.00288913	9154737	9154572	-165
AT1G26470	9155090	9156370	+	0.128289	0.188513	0.38746	9156239	9156196	-43
AT1G26520	9163210	9165900	-	0.0753968	0.999978	1	9163308	9163305	3
AT1G26550	9171117	9173033	+	0.30131	6.51217e-16	2.95727e-14	9172922	9172870	-52
AT1G26560	9178211	9181967	+	0.275311	0.0014069	0.00812842	9181821	9181795	-26
AT1G26570	9182007	9184393	+	0.289247	0.128032	0.29428	9184393	9184354	-39
AT1G26580	9184566	9187578	+	0.123374	0.0977738	0.242474	9187508	9187459	-49
AT1G26600	9191502	9192590	+	0.233333	0.80671	0.952331	9192357	9192335	-22
AT1G26620	9195511	9199671	-	0.25	0.200865	0.405042	9195597	9195595	2
AT1G26630	9205799	9207417	+	0.0650566	2.86535e-08	5.05459e-07	9207298	9207301	3
AT1G26640	9207382	9209902	-	0.2625	0.00633632	0.0283043	9207404	9207461	-57
AT1G26650	9210050	9211588	+	0.205182	0.00740618	0.0322503	9211513	9211540	27
AT1G26660	9211598	9214004	+	0.2	0.590125	0.800021	9213943	9215545	1602
AT1G26665	9214071	9215557	+	0.0366162	1	1	9215538	9215540	2
AT1G26670	9215769	9218010	+	0.0931572	0.0508855	0.148781	9217946	9218007	61
AT1G26690	9224058	9225792	-	0.0771144	0.982072	1	9224143	9224151	-8
AT1G26740	9244980	9246652	-	0.219912	0.0233101	0.081534	9245076	9245104	-28
AT1G26750	9246856	9248274	+	0.207719	0.0383931	0.120644	9248213	9248143	-70
AT1G26761	9250040	9251659	-	0.117796	0.430577	0.663975	9250216	9250266	-50
AT1G26770	9259431	9261313	+	0.103372	0.285884	0.512397	9261186	9261173	-13
AT1G26800	9285024	9286395	-	0.0987562	0.902029	1	9285496	9285490	6
AT1G26820	9292445	9293862	-	0.183498	0.505538	0.732988	9292618	9292607	11
AT1G26830	9295564	9298629	+	0.184005	0.00179951	0.0100156	9298537	9298494	-43
AT1G26840	9298669	9300800	+	0.25	0.806731	0.952331	9300636	9300702	66
AT1G26850	9300805	9304328	-	0.105145	0.000582674	0.00383956	9300932	9300944	-12
AT1G26880	9315304	9318277	-	0.133846	5.99256e-07	8.21074e-06	9315463	9315382	81
AT1G26910	9321649	9323028	+	0.123994	0.576111	0.788118	9322944	9322958	14
AT1G26920	9329492	9330612	+	0.200955	3.17746e-05	0.000300253	9330342	9330149	-193
AT1G26930	9336056	9337938	-	0.0905693	0.965023	1	9336168	9336178	-10
AT1G26940	9343111	9345323	+	0.0929124	0.959542	1	9345144	9345142	-2
AT1G26945	9351159	9352833	+	0.0372181	0.603283	0.810656	9352756	9352753	-3
AT1G26960	9355826	9357502	+	0.162562	0.945804	1	9356504	9357427	923
AT1G27000	9373884	9376828	+	0.12923	0.0441419	0.133866	9376683	9376621	-62
AT1G27020	9378403	9380790	+	0.228346	0.399899	0.634525	9380590	9380670	80
AT1G27030	9381526	9384060	+	0.109656	0.808573	0.953586	9383897	9383969	72
AT1G27050	9393652	9394716	+	0.0594112	0.990518	1	9394573	9394596	23
AT1G27060	9394906	9396673	+	0.226087	0.586624	0.797656	9396810	9396768	-42
AT1G27070	9396657	9399500	-	0.129371	0.855023	0.978242	9396653	9396690	-37
AT1G27090	9403752	9406369	-	0.0995284	0.0158253	0.060011	9403918	9405180	-1262
AT1G27100	9407084	9411368	-	0.165955	0.00202795	0.0111014	9407239	9407269	-30
AT1G27120	9421008	9424084	+	0.297249	0.101918	0.24952	9424036	9424069	33
AT1G27130	9425279	9426897	+	0.128689	0.00734998	0.0320407	9426767	9426671	-96
AT1G27150	9429007	9432310	+	0.282202	0.00055716	0.00369287	9432133	9432143	10
AT1G27180	9439652	9446223	+	0.28	0.246961	0.464741	9446062	9446008	-54
AT1G27190	9446596	9449046	-	0.0510798	0.876883	0.98875	9446662	9446654	8
AT1G27200	9449337	9451768	-	0.153504	0.447552	0.679277	9449546	9449552	-6
AT1G27210	9455276	9458176	-	0.256254	6.51531e-05	0.00057244	9455306	9455455	-149
AT1G27290	9481404	9482992	+	0.0592184	0.475062	0.705271	9482884	9482892	8
AT1G27300	9483156	9484368	+	0.1726	0.0415697	0.128193	9484374	9484321	-53
AT1G27310	9484315	9486002	-	0.347392	1.11614e-27	1.18266e-25	9484365	9484443	-78
AT1G27320	9486888	9492632	+	0.142715	0.0267928	0.0908565	9492567	9492512	-55
AT1G27330	9492848	9494382	+	0.0445985	0.980581	1	9494048	9494036	-12
AT1G27340	9495343	9498085	+	0.0889373	0.536825	0.758157	9498023	9498024	1
AT1G27350	9497999	9499639	-	0.163748	0.000319767	0.00227705	9498152	9498172	-20
AT1G27360	9500891	9504023	+	0.257919	0.641599	0.841592	9502647	9503816	1169
AT1G27370	9505111	9508542	-	0.253286	0.0968487	0.240819	9505178	9505200	-22
AT1G27385	9510474	9512971	-	0.136345	0.0817449	0.212748	9510949	9511021	-72
AT1G27390	9513080	9515050	-	0.2074	7.25479e-05	0.000628722	9513164	9513108	56
AT1G27400	9515113	9517070	+	0.139936	1.40853e-08	2.61532e-07	9516850	9516814	-36
AT1G27410	9517200	9519025	+	0.169772	0.879136	0.989386	9518920	9518902	-18
AT1G27430	9520824	9527280	-	0.115506	0.748614	0.914774	9520894	9520912	-18
AT1G27435	9527500	9528878	-	0.19674	0.000805993	0.0050178	9527798	9527723	75
AT1G27440	9528966	9531489	-	0.19697	0.455379	0.686738	9529061	9529053	8
AT1G27450	9531808	9534141	+	0.111165	0.00110705	0.00664159	9533965	9533932	-33
AT1G27460	9534487	9537614	+	0.280003	0.000352187	0.00247356	9537539	9537501	-38
AT1G27470	9540048	9544303	-	0.148413	0.386229	0.621832	9540104	9540192	-88
AT1G27480	9544409	9546285	+	0.345137	2.4554e-06	3.0206e-05	9546223	9546189	-34
AT1G27500	9551450	9554422	-	0.273504	0.347481	0.580743	9551448	9551571	-123
AT1G27510	9554709	9558461	-	0.250277	0.000295963	0.00213431	9554825	9554743	82
AT1G27520	9558561	9562485	+	0.163105	0.336663	0.569008	9562319	9562320	1
AT1G27530	9562486	9564031	-	0.174956	0.000455221	0.00310128	9562613	9562623	-10
AT1G27540	9565912	9567906	-	0.106512	0.226185	0.439453	9566433	9566486	-53
AT1G27565	9574549	9575189	+	0.147807	0.12762	0.293682	9575182	9575139	-43
AT1G27580	9589806	9591075	-	0.265217	0.381508	0.616919	9589911	9589890	21
AT1G27595	9592087	9602917	+	0.223765	0.0204554	0.0735796	9603250	9603231	-19
AT1G27600	9603177	9606247	-	0.111153	0.523035	0.747727	9603550	9603563	-13
AT1G27630	9611052	9614336	+	0.343532	0.000782332	0.00490315	9614282	9614227	-55
AT1G27650	9614550	9616357	+	0.0600327	0.471749	0.70219	9616332	9615787	-545
AT1G27660	9621397	9626067	+	0.356643	0.353405	0.587153	9625973	9625915	-58
AT1G27670	9627532	9628749	-	0.220588	0.835779	0.967563	9627576	9627570	6
AT1G27680	9631189	9634597	+	0.132353	0.97018	1	9634556	9634571	15
AT1G27690	9636587	9638901	+	0.070411	0.997798	1	9638521	9638515	-6
AT1G27695	9639023	9640204	+	0.118429	0.330419	0.562339	9640047	9640090	43
AT1G27700	9639858	9641902	-	0.381521	0.00417704	0.0201977	9640217	9640243	-26
AT1G27730	9648020	9649323	-	0.282135	0.213847	0.423536	9648151	9648199	-48
AT1G27750	9657172	9661994	+	0.464369	8.55608e-06	9.26996e-05	9661959	9661907	-52
AT1G27752	9662020	9667550	+	0.109347	0.682486	0.872401	9667033	9667035	2
AT1G27760	9668507	9671657	+	0.247294	4.00676e-07	5.6911e-06	9671515	9671505	-10
AT1G27770	9671631	9676307	-	0.0758772	0.937409	1	9671720	9671701	19
AT1G27840	9693007	9696546	-	0.2	0.275783	0.499862	9693139	9693196	-57
AT1G27850	9698297	9703944	+	0.100697	0.775994	0.932531	9703998	9703928	-70
AT1G27900	9715341	9720629	-	0.289872	0.0242045	0.0840522	9715419	9715426	-7
AT1G27910	9720732	9724800	-	0.142857	0.665229	0.858698	9720791	9720732	59
AT1G27930	9730958	9733000	-	0.0678473	0.548879	0.768438	9731387	9731246	141
AT1G27950	9740507	9742159	+	0.0474042	0.0725225	0.194183	9742128	9742160	32
AT1G27960	9742136	9745796	-	0.291667	0.328652	0.560773	9742255	9742241	14
AT1G27970	9746708	9748467	+	0.128841	0.000390519	0.00270453	9748008	9748001	-7
AT1G27980	9748505	9752769	+	0.150246	0.319644	0.550426	9752731	9752741	10
AT1G28010	9763210	9768113	+	0.3	0.0563525	0.160309	9768065	9768113	48
AT1G28050	9775521	9778043	-	0.257143	0.44622	0.678294	9775559	9775539	20
AT1G28060	9778850	9782907	+	0.186869	0.188118	0.386898	9782607	9782586	-21
AT1G28070	9782846	9784091	+	0.244444	0.170845	0.361909	9784010	9783993	-17
AT1G28090	9795717	9799116	+	0.219096	0.103295	0.252098	9799000	9798959	-41
AT1G28100	9801081	9804394	+	0.157143	0.347368	0.580704	9804092	9804004	-88
AT1G28110	9803640	9806899	-	0.272683	0.0593463	0.167065	9803964	9803940	24
AT1G28120	9812929	9815560	-	0.143187	0.0437111	0.13294	9812978	9812958	20
AT1G28130	9825168	9828118	+	0.232667	0.00210264	0.0114411	9828056	9827953	-103
AT1G28140	9831875	9834510	-	0.137645	0.0192287	0.0700162	9832856	9832916	-60
AT1G28150	9834641	9836210	-	0.0963424	0.0924939	0.233164	9834943	9835037	-94
AT1G28190	9846746	9848015	-	0.155449	0.925474	1	9847379	9846898	481
AT1G28200	9849843	9852449	-	0.214459	0.000578514	0.00381531	9850193	9850231	-38
AT1G28230	9862040	9864779	-	0.442424	0.00266973	0.0139215	9862048	9862071	-23
AT1G28240	9868256	9872278	-	0.147447	0.315532	0.545807	9868325	9868363	-38
AT1G28250	9874246	9875579	+	0.144194	0.197319	0.400125	9875507	9875519	12
AT1G28260	9875526	9879433	-	0.178512	0.152246	0.333535	9875595	9875650	-55
AT1G28280	9885399	9887478	-	0.0916667	0.361409	0.595258	9886488	9886459	29
AT1G28290	9889100	9891015	-	0.0551805	0.566559	0.781915	9889130	9889141	-11
AT1G28310	9912202	9913837	-	0.0995733	0.890935	0.995467	9911888	9911887	1
AT1G28320	9920218	9924488	-	0.172227	0.0993621	0.245071	9920478	9920514	-36
AT1G28330	9933785	9935440	-	0.0705241	0.0170109	0.0633781	9933922	9933998	-76
AT1G28340	9939960	9943616	+	0.175849	0.0147675	0.0567079	9943551	9943470	-81
AT1G28350	9943736	9949835	+	0.248205	0.0223433	0.078829	9949803	9949790	-13
AT1G28380	9963447	9966320	+	0.253133	0.000831324	0.00514527	9966308	9966247	-61
AT1G28395	9969245	9971681	-	0.12393	0.493138	0.722123	9969449	9969447	2
AT1G28400	9972184	9973942	-	0.05016	0.856607	0.979278	9972464	9972462	2
AT1G28410	9976181	9979793	-	0.100894	0.925062	1	9976380	9976177	203
AT1G28420	9979477	9987737	+	0.366359	3.12071e-05	0.000295769	9987709	9981537	-6172
AT1G28440	9996712	10000455	+	0.271477	1.06047e-10	2.71857e-09	10000447	10000345	-102
AT1G28490	10015855	10018047	+	0.131652	0.397815	0.632682	10017966	10018027	61
AT1G28510	10023816	10026311	+	0.339612	1.05411e-05	0.000111999	10026248	10026128	-120
AT1G28520	10029082	10031990	+	0.107867	0.433511	0.665852	10031895	10031969	74
AT1G28530	10031984	10035638	-	0.225146	0.499293	0.727639	10032024	10032012	12
AT1G28540	10035616	10037403	+	0.144737	0.445007	0.677201	10036928	10036939	11
AT1G28570	10041575	10044258	-	0.214286	0.65195	0.84984	10041655	10041688	-33
AT1G28580	10044336	10046552	-	0.0954474	0.207288	0.414629	10044460	10044447	13
AT1G28600	10050956	10053218	-	0.218785	0.00146087	0.00841271	10051005	10051149	-144
AT1G28610	10053442	10055881	-	0.389418	0.00212072	0.0115079	10053776	10053802	-26
AT1G28660	10071608	10073549	-	0.244444	0.115242	0.272365	10071706	10071749	-43
AT1G28670	10074358	10076457	-	0.16747	0.0157231	0.0597283	10074523	10074554	-31
AT1G28680	10078188	10079909	+	0.104364	0.701434	0.88488	10079894	10079927	33
AT1G28710	10086365	10089772	-	0.1269	0.922689	1	10086707	10086689	18
AT1G28760	10103080	10104883	+	0.306548	0.301519	0.530478	10104881	10104765	-116
AT1G28960	10109499	10111738	-	0.242475	0.00513185	0.0238474	10109591	10109614	-23
AT1G29030	10128998	10133992	-	0.223684	0.655913	0.852413	10129088	10129038	50
AT1G29040	10133982	10136124	+	0.11945	0.267927	0.490114	10135289	10135359	70
AT1G29050	10136245	10139228	-	0.135701	0.531663	0.75469	10136229	10136241	-12
AT1G29060	10147604	10149780	+	0.12028	0.659625	0.854809	10149686	10149604	-82
AT1G29070	10149790	10151407	+	0.323988	5.72289e-100	5.35057e-97	10151306	10151247	-59
AT1G29090	10162794	10164452	-	0.111111	0.990731	1	10162871	10162876	-5
AT1G29120	10174161	10178521	+	0.154109	0.108203	0.260576	10178412	10178466	54
AT1G29150	10180301	10182808	+	0.213188	7.24395e-11	1.89367e-09	10182658	10182700	42
AT1G29170	10190136	10195213	-	0.102041	0.977357	1	10190157	10190138	19
AT1G29220	10210519	10212722	-	0.172414	0.324196	0.555496	10210558	10210554	4
AT1G29250	10223265	10224799	-	0.162592	0.000177536	0.00136449	10223284	10223372	-88
AT1G29260	10224814	10226322	+	0.14693	0.2469	0.464741	10226013	10226040	27
AT1G29270	10229807	10231384	+	0.266667	0.200325	0.404313	10231157	10231174	17
AT1G29280	10236336	10237990	+	0.143324	0.716548	0.895237	10237567	10237625	58
AT1G29300	10247706	10249704	-	0.375	0.0374223	0.118154	10247727	10247803	-76
AT1G29310	10252240	10254792	+	0.167532	0.0225145	0.0793272	10254602	10254661	59
AT1G29320	10255249	10258343	+	0.285714	0.251886	0.470555	10257100	10258356	1256
AT1G29330	10258247	10261232	-	0.119437	0.647703	0.846552	10258330	10258347	-17
AT1G29340	10264042	10266917	+	0.139622	0.0988731	0.244399	10266726	10266850	124
AT1G29350	10268420	10273821	-	0.0759684	0.189002	0.388265	10268577	10268575	2
AT1G29370	10277747	10283225	-	0.0786104	0.202528	0.407518	10277896	10277894	2
AT1G29390	10286066	10288103	-	0.0844395	0.394931	0.630087	10286294	10286291	3
AT1G29395	10288128	10289666	-	0.0816607	0.220294	0.431999	10288204	10288229	-25
AT1G29400	10289997	10294630	-	0.114927	0.0718048	0.192521	10290055	10290043	12
AT1G29410	10297749	10300073	-	0.317419	0.0978343	0.242574	10297884	10298383	-499
AT1G29418	10300877	10301302	+	0.0440757	0.936512	1	10301289	10301306	17
AT1G29420	10301376	10302099	-	0.16349	0.675966	0.867204	10301383	10301393	-10
AT1G29430	10302584	10303418	-	0.0522366	0.872544	0.9865	10302734	10302717	17
AT1G29440	10304506	10305108	-	0.0750388	0.186229	0.384057	10304488	10304521	-33
AT1G29450	10305552	10306595	-	0.0332033	0.998874	1	10305888	10305908	-20
AT1G29460	10307351	10308246	-	0.0502583	0.949754	1	10307514	10307512	2
AT1G29465	10308519	10309896	+	0.0659465	0.475529	0.705635	10309769	10309791	22
AT1G29470	10310130	10314147	-	0.124906	0.00016504	0.00128021	10310241	10310283	-42
AT1G29490	10319731	10320402	+	0.166667	0.892938	0.996501	10320363	10320365	2
AT1G29500	10321010	10321978	+	0.0592713	0.580878	0.792157	10321769	10321788	19
AT1G29510	10322422	10323239	+	0.0598469	0.800256	0.948138	10323178	10323183	5
AT1G29520	10323635	10324826	+	0.110714	0.848825	0.974729	10324735	10324744	9
AT1G29530	10324744	10326848	-	0.156965	0.530207	0.753496	10324825	10324819	6
AT1G29535	10327137	10329116	-	0.383333	0.169148	0.359368	10328044	10328052	-8
AT1G29550	10330424	10332326	+	0.299206	0.0728688	0.194901	10332305	10335637	3332
AT1G29590	10339991	10341832	+	0.219048	0.740327	0.910063	10341832	10341833	1
AT1G29660	10371674	10374005	+	0.0381442	0.537847	0.758859	10373741	10373754	13
AT1G29670	10375598	10377871	+	0.0516606	0.475601	0.705676	10377860	10377834	-26
AT1G29690	10379019	10382153	-	0.0829298	0.985374	1	10379091	10379022	69
AT1G29700	10384944	10387441	-	0.258261	1.08837e-06	1.43082e-05	10385033	10384977	56
AT1G29710	10387513	10389286	+	0.357143	0.0558224	0.159263	10389180	10389166	-14
AT1G29720	10393658	10399873	-	0.331169	0.426188	0.660025	10393831	10393862	-31
AT1G29750	10413852	10420774	-	0.106667	0.976598	1	10413910	10413885	25
AT1G29760	10422291	10424513	+	0.113242	0.767438	0.926945	10424315	10424246	-69
AT1G29790	10429717	10432123	+	0.270237	0.00455798	0.0216511	10431977	10431961	-16
AT1G29800	10432598	10435441	+	0.158412	0.515925	0.741823	10435343	10435328	-15
AT1G29810	10435373	10437558	-	0.149485	0.421741	0.656398	10435359	10435361	-2
AT1G29820	10437656	10440786	+	0.295238	0.0835318	0.216241	10440713	10440695	-18
AT1G29840	10445618	10447753	-	0.292517	0.0456535	0.137393	10445703	10445682	21
AT1G29850	10447346	10449969	+	0.104424	0.0470462	0.140423	10449808	10449818	10
AT1G29880	10459456	10462967	-	0.277687	7.88926e-11	2.05898e-09	10459518	10459513	5
AT1G29890	10463028	10467452	+	0.401709	4.93289e-07	6.87749e-06	10467306	10467225	-81
AT1G29900	10467955	10472211	+	0.0865095	0.143312	0.319063	10472080	10472041	-39
AT1G29910	10472279	10473502	-	0.0088349	0.103079	0.251703	10472286	10472294	-8
AT1G29920	10474655	10475969	-	0.0104592	0.0339418	0.109293	10474919	10474933	-14
AT1G29930	10477884	10479114	+	0.00588947	0.0665579	0.182172	10478998	10478992	-6
AT1G29940	10479006	10486824	-	0.128663	0.397003	0.631811	10479165	10479123	42
AT1G29950	10491697	10494598	+	0.120495	0.100345	0.247001	10494520	10494513	-7
AT1G29960	10494626	10496205	+	0.467672	0.00153853	0.00878041	10496150	10496124	-26
AT1G29965	10498309	10499462	-	0.0761791	0.62061	0.825161	10498309	10498313	-4
AT1G29970	10498350	10501498	-	0.0676435	0.347605	0.580767	10498309	10498308	1
AT1G29980	10503238	10506189	-	0.0922619	0.974245	1	10503282	10503321	-39
AT1G29990	10507532	10509151	+	0.0626566	0.916955	1	10509050	10509041	-9
AT1G30000	10509155	10512558	-	0.152174	0.296093	0.52424	10509227	10509365	-138
AT1G30010	10513193	10516385	+	0.341912	0.233636	0.448475	10516422	10516366	-56
AT1G30070	10546510	10548236	-	0.344286	0.000110028	0.000900968	10546595	10546681	-86
AT1G30090	10559495	10561545	-	0.0797619	0.931345	1	10559561	10559559	2
AT1G30110	10581734	10584152	+	0.195789	0.755027	0.918585	10584064	10584039	-25
AT1G30120	10584104	10586680	-	0.11795	6.61067e-05	0.000580177	10584167	10584183	-16
AT1G30130	10587470	10590209	+	0.188494	0.053579	0.154665	10589614	10589618	4
AT1G30200	10624999	10627135	+	0.178724	0.077962	0.205392	10627073	10627024	-49
AT1G30210	10627184	10630630	-	0.0510088	0.946723	1	10627131	10627118	13
AT1G30230	10638877	10640941	+	0.0519182	0.00151194	0.00864727	10640661	10640676	15
AT1G30240	10641030	10646195	-	0.177419	0.721792	0.897957	10641112	10641119	-7
AT1G30260	10650913	10651829	+	0.115942	0.8289	0.964531	10651598	10651636	38
AT1G30270	10654799	10658924	+	0.231136	0.000255837	0.00187905	10658783	10658728	-55
AT1G30290	10670128	10672836	-	0.185383	0.567313	0.78224	10670233	10670116	117
AT1G30300	10672972	10675455	+	0.270833	0.264417	0.485517	10675360	10675363	3
AT1G30320	10680078	10683137	+	0.21	0.657294	0.853376	10682971	10682952	-19
AT1G30330	10685821	10690988	-	0.0952381	0.595836	0.805213	10685977	10685894	83
AT1G30360	10715481	10718997	+	0.152311	6.54397e-07	8.92023e-06	10718982	10718969	-13
AT1G30380	10722182	10723247	+	0.0651737	1.1942e-32	1.77389e-30	10723141	10723085	-56
AT1G30400	10727316	10738092	+	0.0444201	0.961289	1	10737833	10737746	-87
AT1G30410	10738682	10747563	+	0.128205	0.892231	0.996075	10747517	10747506	-11
AT1G30440	10758742	10762429	+	0.376721	5.19808e-10	1.20964e-08	10762389	10762347	-42
AT1G30450	10762707	10769616	+	0.328358	0.00102621	0.00621592	10769494	10769199	-295
AT1G30460	10770812	10775428	-	0.0928854	0.966009	1	10771319	10771320	-1
AT1G30470	10779110	10786697	+	0.117863	0.327866	0.56002	10786647	10786601	-46
AT1G30475	10788225	10790241	-	0.335404	0.133904	0.304213	10788343	10788319	24
AT1G30480	10790021	10792725	+	0.084669	0.939748	1	10790561	10792598	2037
AT1G30490	10796123	10801093	-	0.263581	0.0287785	0.0960733	10796187	10796195	-8
AT1G30500	10804449	10806428	-	0.364532	7.73558e-05	0.000663157	10804454	10804483	-29
AT1G30510	10806929	10809188	-	0.33679	0.000509059	0.00342114	10807024	10807081	-57
AT1G30520	10810396	10813779	+	0.290511	0.0100931	0.04142	10813628	10813608	-20
AT1G30530	10814611	10816615	+	0.114766	0.225135	0.437981	10816518	10816426	-92
AT1G30540	10816615	10819419	-	0.10307	0.970263	1	10816806	10816782	24
AT1G30545	10819494	10822055	-	0.258333	0.503697	0.73112	10819494	10820750	-1256
AT1G30570	10828372	10831656	+	0.30276	0.00268726	0.0139991	10831625	10831607	-18
AT1G30580	10831672	10835635	-	0.192586	1.35684e-11	3.90681e-10	10831731	10831666	65
AT1G30590	10835734	10840872	-	0.135786	0.438419	0.670556	10835796	10835797	-1
AT1G30600	10841106	10845242	-	0.163399	0.958015	1	10841154	10841163	-9
AT1G30610	10846512	10850724	+	0.28761	0.00712341	0.0312329	10850596	10850555	-41
AT1G30620	10854516	10858280	+	0.210526	0.652035	0.849881	10858237	10858236	-1
AT1G30630	10858231	10860322	-	0.0722455	0.24407	0.461047	10858345	10858353	-8
AT1G30640	10860618	10865074	+	0.248593	0.240919	0.456994	10865030	10864865	-165
AT1G30650	10868217	10871297	+	0.192308	0.887792	0.994262	10871121	10871139	18
AT1G30680	10881478	10886472	+	0.171283	0.0262537	0.0895444	10886301	10886270	-31
AT1G30690	10887606	10890407	+	0.0801282	0.55784	0.775434	10890217	10890200	-17
AT1G30720	10897924	10899975	+	0.166667	0.949227	1	10899920	10899923	3
AT1G30730	10900680	10902626	+	0.173077	0.883711	0.991788	10902487	10902548	61
AT1G30750	10904774	10905724	-	0.349495	0.182487	0.378551	10904913	10904919	-6
AT1G30755	10905730	10909760	-	0.215584	0.504548	0.731753	10905833	10905837	-4
AT1G30760	10918266	10920709	+	0.142857	0.997085	1	10920481	10920200	-281
AT1G30810	10936764	10942292	-	0.198582	0.233378	0.448064	10937923	10937896	27
AT1G30820	10944907	10949482	-	0.142187	0.00741149	0.0322646	10945031	10944907	124
AT1G30825	10960907	10963231	+	0.425	0.00206666	0.0112685	10963101	10963250	149
AT1G30840	10974382	10976298	+	0.3	0.381217	0.616698	10976037	10976006	-31
AT1G30845	10979645	10980725	+	0.555901	0.000414509	0.00285203	10980683	10980567	-116
AT1G30880	10993001	10994152	-	0.149757	4.05653e-08	6.9402e-07	10993198	10993228	-30
AT1G30890	10994242	10996223	+	0.175329	0.0531391	0.153702	10996166	10996134	-32
AT1G30910	11000861	11003226	+	0.0951672	0.570668	0.784384	11002898	11002940	42
AT1G30960	11037551	11040084	-	0.142857	0.972789	1	11037573	11037619	-46
AT1G30970	11040249	11043773	-	0.145385	0.166338	0.355059	11040299	11040320	-21
AT1G31010	11054730	11056959	-	0.128261	0.990473	1	11054751	11054777	-26
AT1G31020	11057104	11059037	+	0.334595	0.00177288	0.00990097	11058827	11058882	55
AT1G31040	11069509	11072564	-	0.234848	0.724735	0.899243	11069554	11069646	-92
AT1G31070	11084665	11088589	+	0.0875	0.94609	1	11088556	11088448	-108
AT1G31120	11104236	11108095	-	0.253803	0.0587953	0.165985	11104257	11104336	-79
AT1G31130	11114692	11116195	-	0.210794	0.000114106	0.000928283	11114763	11114833	-70
AT1G31150	11119826	11122675	+	0.159091	0.803124	0.950119	11122585	11122573	-12
AT1G31160	11122603	11124220	-	0.217545	0.000666721	0.00429893	11122663	11122680	-17
AT1G31170	11133409	11135189	+	0.140556	0.0145391	0.0559979	11134365	11134329	-36
AT1G31175	11140470	11142716	+	0.208026	0.393758	0.629111	11142632	11142584	-48
AT1G31180	11142460	11144717	-	0.0701075	0.528628	0.75213	11142719	11142742	-23
AT1G31190	11144771	11146930	+	0.260751	0.000125695	0.00100797	11146921	11146867	-54
AT1G31220	11156697	11158683	+	0.194444	0.598915	0.807666	11158645	11158626	-19
AT1G31230	11158617	11163274	-	0.107143	0.523754	0.748066	11158643	11158634	9
AT1G31280	11181503	11185396	+	0.391026	0.0315304	0.103246	11185394	11185330	-64
AT1G31290	11188119	11192585	+	0.527972	0.0125049	0.049589	11192565	11191223	-1342
AT1G31300	11193624	11196397	+	0.212762	0.00719242	0.0314574	11196149	11196313	164
AT1G31320	11212957	11214567	+	0.264706	0.155331	0.338095	11214385	11214371	-14
AT1G31330	11214675	11216141	-	0.120506	2.15656e-156	3.11604e-153	11214875	11214911	-36
AT1G31335	11216809	11217546	-	0.0889894	0.9824	1	11216923	11216927	-4
AT1G31340	11217694	11219618	-	0.343428	4.85506e-13	1.67389e-11	11217908	11217954	-46
AT1G31350	11221266	11222827	-	0.482517	0.084642	0.218428	11221342	11222122	-780
AT1G31360	11232317	11237594	+	0.253247	0.356262	0.590206	11237516	11237524	8
AT1G31410	11246816	11249587	-	0.247037	0.0120763	0.0481658	11246929	11247055	-126
AT1G31420	11249599	11253915	+	0.318958	2.38313e-17	1.24189e-15	11253872	11253796	-76
AT1G31440	11255835	11258814	-	0.0775944	0.617371	0.822717	11255925	11255864	61
AT1G31460	11261442	11263364	-	0.177833	0.601814	0.809524	11261568	11262879	-1311
AT1G31470	11262917	11264963	-	0.191304	0.855744	0.978644	11262875	11262879	-4
AT1G31480	11265815	11271701	+	0.329023	0.0915348	0.23148	11271697	11271695	-2
AT1G31500	11273572	11276636	-	0.241987	0.0394318	0.122852	11273615	11273658	-43
AT1G31540	11288377	11293799	-	0.163043	0.498221	0.726936	11288450	11291330	-2880
AT1G31550	11295445	11297379	-	0.151613	0.646009	0.845215	11295586	11295569	17
AT1G31580	11310996	11311989	+	0.043034	0.000353423	0.00248114	11311946	11311933	-13
AT1G31600	11312960	11316582	-	0.0758808	0.989316	1	11313246	11313162	84
AT1G31650	11326250	11330791	-	0.408396	1.91025e-06	2.39633e-05	11326292	11326349	-57
AT1G31660	11330923	11333540	-	0.177252	0.0539852	0.155528	11330962	11331026	-64
AT1G31710	11349696	11355587	+	0.110564	0.396552	0.631669	11355468	11355423	-45
AT1G31730	11359511	11364288	+	0.0805627	0.500668	0.728653	11364256	11364242	-14
AT1G31760	11372393	11374301	-	0.244144	0.239582	0.455678	11372394	11372421	-27
AT1G31770	11374759	11377885	-	0.110048	0.993193	1	11374978	11374977	1
AT1G31780	11391198	11394748	+	0.203964	0.0055665	0.0254455	11394723	11394692	-31
AT1G31790	11394689	11396018	-	0.25	0.750228	0.915831	11394654	11395676	-1022
AT1G31800	11396401	11399714	+	0.085532	0.353452	0.587153	11399695	11399643	-52
AT1G31810	11399606	11406809	-	0.200206	0.204996	0.411285	11399623	11399673	-50
AT1G31812	11410765	11412233	-	0.185474	4.63345e-47	1.38951e-44	11410962	11411019	-57
AT1G31814	11412391	11414502	-	0.196833	0.569087	0.783452	11412710	11412740	-30
AT1G31817	11414694	11416444	-	0.203729	0.0349728	0.111879	11414761	11414762	-1
AT1G31820	11416450	11418464	-	0.280556	0.130754	0.298822	11416508	11416505	3
AT1G31830	11418588	11420961	-	0.0904227	0.855183	0.978315	11418709	11418640	69
AT1G31835	11422635	11423684	-	0.27896	0.00744079	0.0323745	11423026	11423043	-17
AT1G31850	11430099	11434115	+	0.302439	0.000878033	0.00541119	11433651	11433550	-101
AT1G31860	11434059	11436607	-	0.113466	0.218606	0.429484	11434107	11435786	-1679
AT1G31870	11436718	11440275	+	0.236849	0.046504	0.139304	11440052	11439891	-161
AT1G31880	11445489	11450232	+	0.245658	0.573909	0.78649	11450218	11450220	2
AT1G31910	11456801	11463896	+	0.0251121	0.997145	1	11461822	11461823	1
AT1G31920	11461854	11463857	-	0.16092	0.132683	0.302277	11461856	11461810	46
AT1G31930	11464933	11469207	+	0.106007	0.622968	0.826913	11469120	11469090	-30
AT1G31940	11470055	11471481	-	0.107087	0.470987	0.701187	11470136	11470129	7
AT1G31970	11479762	11482890	+	0.187498	8.64088e-06	9.34909e-05	11482896	11482831	-65
AT1G32050	11528384	11531350	+	0.151976	3.0023e-05	0.00028574	11531225	11531143	-82
AT1G32060	11532198	11534639	+	0.0544421	1.5521e-07	2.39042e-06	11534636	11534614	-22
AT1G32070	11534606	11536437	-	0.132029	0.00823875	0.0351441	11534734	11534756	-22
AT1G32080	11537241	11539896	-	0.252637	9.66382e-26	8.77696e-24	11537355	11537441	-86
AT1G32090	11539992	11544166	-	0.192564	0.387037	0.622629	11540054	11540012	42
AT1G32100	11546159	11548016	-	0.0949741	0.880459	0.989773	11546331	11546342	-11
AT1G32127	11556743	11558702	+	0.182456	0.587199	0.797902	11558693	11558695	2
AT1G32130	11558754	11561920	-	0.0534091	0.826322	0.96379	11558859	11558863	-4
AT1G32150	11565493	11568645	+	0.213439	0.226968	0.440055	11568532	11568529	-3
AT1G32160	11568653	11570438	+	0.394532	2.97186e-22	2.16673e-20	11570391	11570296	-95
AT1G32170	11575319	11578030	+	0.125146	0.799206	0.947317	11577850	11577863	13
AT1G32190	11592926	11596056	-	0.233088	0.0187167	0.06845	11592958	11592994	-36
AT1G32200	11601670	11605174	-	0.254404	6.57086e-07	8.9492e-06	11602056	11601799	257
AT1G32210	11605605	11607866	-	0.127743	0.0125519	0.04976	11605856	11605954	-98
AT1G32220	11607853	11609968	+	0.128355	0.000209675	0.0015761	11609714	11609687	-27
AT1G32230	11611890	11617419	+	0.0449693	0.589795	0.799778	11616189	11616184	-5
AT1G32240	11625615	11630745	-	0.271505	0.14328	0.319063	11625779	11625823	-44
AT1G32260	11640557	11641889	-	0.166276	0.364392	0.598372	11640594	11640590	4
AT1G32310	11653499	11654833	+	0.0818746	0.904542	1	11654723	11654725	2
AT1G32330	11656963	11660471	-	0.303069	0.0433937	0.132352	11657021	11657008	13
AT1G32340	11663007	11666120	-	0.151084	0.738654	0.909014	11663343	11663345	-2
AT1G32360	11672765	11675387	+	0.123323	0.201492	0.405844	11675329	11675317	-12
AT1G32370	11676924	11678692	+	0.289298	0.00328517	0.0166024	11678449	11678003	-446
[truncated: 13,895 more rows]
