# Supplementary material for: Nanopore direct RNA sequencing maps the complexity of Arabidopsis mRNA processing and m6A modification
Source: eLife. 2020 Jan 14;9:e49658. doi: 10.7554/eLife.49658 (PMC6959997; doi:10.7554/eLife.49658)
Supplement: Figure 7—source data 2. [file elife-49658-fig7-data2.tds]

# chrom	start	end	name	logFC	strand	mean_cov	neg_log10_p_value	neg_log10_fdr
1	3690	3913	vir1_vs_VIRc	1.45158	+	21.064	2.40764	1.48261
1	3996	4276	vir1_vs_VIRc	1.7061	+	23.1785	2.71588	1.65463
1	4706	4922	vir1_vs_VIRc	1.21166	+	23.3257	2.3642	1.45869
1	4946	5095	vir1_vs_VIRc	1.17148	+	25.5694	1.73103	1.07079
1	11974	12876	vir1_vs_VIRc	1.4226	-	39.7949	5.58989	3.72096
1	23171	24451	vir1_vs_VIRc	2.5147	+	26.7963	5.97666	3.84278
1	24542	24655	vir1_vs_VIRc	2.20629	+	19.886	2.42656	1.49268
1	24752	24962	vir1_vs_VIRc	2.47717	+	25.3487	3.43136	2.08783
1	25041	25435	vir1_vs_VIRc	2.42633	+	33.2561	4.36388	2.65457
1	25524	25743	vir1_vs_VIRc	2.70293	+	30.1871	2.74955	1.67345
1	25825	25997	vir1_vs_VIRc	2.65672	+	29.2028	3.85939	2.35193
1	26081	26203	vir1_vs_VIRc	2.00825	+	33.9797	2.21346	1.36914
1	26292	26452	vir1_vs_VIRc	2.46171	+	27.0725	2.52811	1.5485
1	26543	26776	vir1_vs_VIRc	1.72815	+	35.3921	3.72381	2.26565
1	26862	27012	vir1_vs_VIRc	1.9548	+	42.5762	2.98588	1.80994
1	27099	27281	vir1_vs_VIRc	1.94336	+	38.4923	3.0447	1.84523
1	27372	27536	vir1_vs_VIRc	2.34135	+	28.1692	2.59736	1.59
1	27618	27713	vir1_vs_VIRc	2.03496	+	34.8238	2.14371	1.32479
1	27803	28431	vir1_vs_VIRc	1.59568	+	42.4858	3.53419	2.14403
1	28575	28805	vir1_vs_VIRc	1.85255	+	41.1165	3.36071	2.04514
1	28890	29080	vir1_vs_VIRc	1.33223	+	69.4926	2.32529	1.43716
1	29160	29975	vir1_vs_VIRc	1.23977	+	68.5678	4.03715	2.44892
1	34873	35011	vir1_vs_VIRc	6.36204	+	2.34592	1.6651	1.02982
1	35044	35474	vir1_vs_VIRc	1.07771	-	251.849	3.39956	2.23765
1	35567	35648	vir1_vs_VIRc	1.07494	-	278.432	1.57929	1.00446
1	35730	35963	vir1_vs_VIRc	1.08267	-	322.345	2.46637	1.60844
1	36624	36685	vir1_vs_VIRc	1.22575	-	256.852	1.72146	1.10221
1	36810	36923	vir1_vs_VIRc	1.40896	-	239.599	2.07186	1.33859
1	37023	37301	vir1_vs_VIRc	1.44523	-	138.295	3.07712	2.01424
1	39533	39665	vir1_vs_VIRc	1.12672	-	29.7237	1.75941	1.12701
1	40473	40535	vir1_vs_VIRc	1.66027	-	46.4233	2.20375	1.43018
1	40675	40913	vir1_vs_VIRc	1.32312	-	40.0272	2.80766	1.83247
1	48684	48747	vir1_vs_VIRc	4.45557	+	3.55469	1.93602	1.202
1	66107	66160	vir1_vs_VIRc	1.07125	-	422.048	2.2519	1.46414
1	66261	66342	vir1_vs_VIRc	1.09032	-	449.515	2.27666	1.48193
1	66450	66557	vir1_vs_VIRc	1.02066	-	429.578	2.49519	1.62688
1	66835	66898	vir1_vs_VIRc	1.05543	-	415.711	2.4213	1.58137
1	67324	67601	vir1_vs_VIRc	1.2938	-	399.861	4.89092	3.31248
1	67397	67560	vir1_vs_VIRc	2.83419	+	6.44563	1.97204	1.22237
1	76437	76567	vir1_vs_VIRc	3.20973	-	4.63677	2.24556	1.46005
1	79206	79470	vir1_vs_VIRc	2.20818	+	5.89843	2.57098	1.57438
1	82936	83193	vir1_vs_VIRc	-1.45798	-	11.6883	2.41467	1.57571
1	83290	83500	vir1_vs_VIRc	-1.65297	-	12.842	2.14496	1.39053
1	84530	84655	vir1_vs_VIRc	-2.02457	-	7.27116	1.59284	1.01431
1	89778	89939	vir1_vs_VIRc	1.24018	+	19.0581	2.07309	1.28087
1	91503	91633	vir1_vs_VIRc	1.70329	+	23.6838	1.80397	1.1178
1	91743	92058	vir1_vs_VIRc	1.72499	+	34.0237	2.87526	1.74636
1	92359	92525	vir1_vs_VIRc	1.51997	+	32.3787	3.15515	1.90684
1	92569	92933	vir1_vs_VIRc	1.77025	+	35.5973	3.45162	2.09959
1	93045	93171	vir1_vs_VIRc	1.35291	+	34.8944	1.8755	1.16473
1	93271	93502	vir1_vs_VIRc	1.53006	+	42.8879	2.90442	1.75925
1	93659	94173	vir1_vs_VIRc	1.36345	+	51.4587	3.4839	2.11435
1	94189	94281	vir1_vs_VIRc	1.15463	+	66.017	1.83619	1.13798
1	94357	94690	vir1_vs_VIRc	1.20546	+	55.3221	2.75213	1.67489
1	101229	101350	vir1_vs_VIRc	2.84101	-	3.84836	1.60658	1.02304
1	111342	111569	vir1_vs_VIRc	-1.22101	+	41.6912	3.06444	1.85757
1	115961	116181	vir1_vs_VIRc	-1.13603	+	42.9261	2.62313	1.60675
1	117046	117483	vir1_vs_VIRc	1.37077	+	145.31	3.92359	2.39408
1	117485	117689	vir1_vs_VIRc	1.2202	+	146.167	2.40741	1.48249
1	121565	121698	vir1_vs_VIRc	1.06477	+	24.6231	1.68853	1.045
1	122173	123501	vir1_vs_VIRc	1.03482	-	524.355	6.06701	3.9243
1	122339	122541	vir1_vs_VIRc	1.74518	+	20.429	2.93017	1.77499
1	123579	123669	vir1_vs_VIRc	1.26186	-	461.102	2.11224	1.36668
1	123785	123898	vir1_vs_VIRc	1.27901	-	510.449	2.35885	1.53874
1	123992	124123	vir1_vs_VIRc	1.33394	-	364.155	2.48941	1.624
1	124211	124394	vir1_vs_VIRc	1.57405	-	255.958	3.86562	2.56688
1	124497	124633	vir1_vs_VIRc	1.50044	-	292.65	4.47595	2.9942
1	124714	124820	vir1_vs_VIRc	1.6137	-	353.197	3.77698	2.50355
1	124921	125023	vir1_vs_VIRc	1.50677	-	348.096	3.29104	2.17026
1	125134	125226	vir1_vs_VIRc	1.44902	-	435.114	3.12007	2.04399
1	125329	125655	vir1_vs_VIRc	1.65147	-	308.629	5.02562	3.4052
1	125335	125421	vir1_vs_VIRc	inf	+	3.6523	1.84823	1.14544
1	125742	125843	vir1_vs_VIRc	1.49906	-	279.25	2.79867	1.8289
1	125936	125998	vir1_vs_VIRc	1.54627	-	274.339	2.04752	1.32179
1	126076	126591	vir1_vs_VIRc	1.66797	-	289.811	5.22191	3.55501
1	126686	126840	vir1_vs_VIRc	1.62481	-	225.675	2.84404	1.8552
1	126935	127453	vir1_vs_VIRc	1.92375	-	227.618	5.58989	3.72096
1	127532	127573	vir1_vs_VIRc	2.08161	-	192.71	1.82554	1.17256
1	127651	127782	vir1_vs_VIRc	2.16523	-	174.06	3.33382	2.19441
1	127868	127952	vir1_vs_VIRc	2.34177	-	180.994	2.54548	1.66247
1	128027	128313	vir1_vs_VIRc	2.09105	-	248.066	4.89092	3.31248
1	128419	128552	vir1_vs_VIRc	2.05601	-	137.889	2.94809	1.92825
1	128968	129060	vir1_vs_VIRc	2.16475	-	280.352	3.59134	2.37805
1	129853	129915	vir1_vs_VIRc	1.53377	-	263.626	2.27023	1.47691
1	130039	130149	vir1_vs_VIRc	1.58974	-	201.729	3.19954	2.10229
1	130369	130562	vir1_vs_VIRc	2.23938	-	122.704	4.35944	2.91058
1	133303	133393	vir1_vs_VIRc	1.55795	-	6.88095	1.64926	1.05134
1	134047	134190	vir1_vs_VIRc	3.57243	-	5.53762	2.10205	1.35992
1	134967	135059	vir1_vs_VIRc	2.61944	-	6.13351	1.63163	1.03931
1	138649	138729	vir1_vs_VIRc	4.15159	+	2.97428	1.62924	1.00787
1	149567	149679	vir1_vs_VIRc	2.1891	-	10.1158	1.57296	1.00003
1	155197	155443	vir1_vs_VIRc	1.14185	-	68.4646	2.46571	1.60839
1	155582	156038	vir1_vs_VIRc	1.37593	-	68.6034	3.79055	2.51153
1	163421	163516	vir1_vs_VIRc	1.69571	+	31.6406	2.597	1.59
1	163934	164103	vir1_vs_VIRc	1.57364	+	42.1515	2.60912	1.59809
1	164225	164654	vir1_vs_VIRc	1.41558	+	51.1341	3.45684	2.10141
1	165050	165230	vir1_vs_VIRc	1.34399	+	46.9148	2.16556	1.33842
1	176632	176752	vir1_vs_VIRc	2.60273	+	4.91598	2.03471	1.25964
1	177095	177284	vir1_vs_VIRc	2.4677	+	5.84693	2.26225	1.39944
1	180433	180554	vir1_vs_VIRc	2.47987	+	16.2664	2.86912	1.74496
1	181192	181346	vir1_vs_VIRc	1.61238	-	37.4102	1.97132	1.27155
1	181519	181673	vir1_vs_VIRc	1.16729	-	37.771	2.97394	1.94637
1	181786	181952	vir1_vs_VIRc	2.33539	-	16.2275	3.86019	2.56201
1	187182	187349	vir1_vs_VIRc	1.26888	+	77.6275	2.06545	1.27662
1	188011	188176	vir1_vs_VIRc	1.02264	+	112.682	2.9485	1.78366
1	190550	190828	vir1_vs_VIRc	2.14998	+	73.0992	4.22079	2.54892
1	190941	190998	vir1_vs_VIRc	2.10242	+	83.1796	2.45671	1.50664
1	191138	191235	vir1_vs_VIRc	2.75289	-	8.09609	1.62286	1.03323
1	191138	191258	vir1_vs_VIRc	1.86565	+	85.9325	2.90442	1.75925
1	191579	191692	vir1_vs_VIRc	1.29252	+	46.7683	2.05295	1.27002
1	191779	191889	vir1_vs_VIRc	1.03178	+	54.1892	1.67635	1.03701
1	192032	192426	vir1_vs_VIRc	1.54556	+	31.3137	2.86574	1.74267
1	200813	200991	vir1_vs_VIRc	2.40659	-	8.38827	2.34413	1.52928
1	209973	210099	vir1_vs_VIRc	4.73254	+	5.32152	1.86665	1.15825
1	210385	210619	vir1_vs_VIRc	2.65728	+	7.45355	2.11424	1.30662
1	211474	211604	vir1_vs_VIRc	1.46315	+	7.15331	1.66156	1.02775
1	211985	212291	vir1_vs_VIRc	2.1551	+	8.98046	2.75317	1.67577
1	219149	219271	vir1_vs_VIRc	2.3139	+	8.31504	1.88097	1.16767
1	223551	223731	vir1_vs_VIRc	2.02939	+	12.2238	1.91934	1.19178
1	231544	231655	vir1_vs_VIRc	1.17411	-	29.9219	1.9307	1.24379
1	235198	235360	vir1_vs_VIRc	1.17108	-	106.087	3.00897	1.96628
1	235845	236027	vir1_vs_VIRc	1.24889	-	69.7013	2.44698	1.59659
1	236145	236296	vir1_vs_VIRc	1.25245	-	78.9183	2.12248	1.37393
1	236673	236784	vir1_vs_VIRc	1.29244	-	60.9219	2.40021	1.56513
1	236865	237023	vir1_vs_VIRc	1.18384	-	100.15	2.237	1.45405
1	237504	237767	vir1_vs_VIRc	1.32198	-	53.9066	2.85349	1.86053
1	240089	240212	vir1_vs_VIRc	4.05508	-	3.86089	1.70391	1.08965
1	240592	240672	vir1_vs_VIRc	2.39704	-	7.67284	2.4112	1.57399
1	240744	240858	vir1_vs_VIRc	2.94139	-	7.48623	2.74047	1.79286
1	243336	243746	vir1_vs_VIRc	2.29504	-	10.7289	5.22191	3.55501
1	244035	244182	vir1_vs_VIRc	1.98763	-	10.8851	2.63452	1.71751
1	244257	244361	vir1_vs_VIRc	4.89465	-	8.6627	2.937	1.92084
1	244505	244621	vir1_vs_VIRc	4.74594	-	9.49573	2.33213	1.5214
1	244770	244873	vir1_vs_VIRc	2.69432	-	6.64022	1.85098	1.19038
1	245151	245264	vir1_vs_VIRc	3.45432	-	12.1447	2.78666	1.82192
1	245877	245991	vir1_vs_VIRc	3.25445	-	5.23333	2.50651	1.63622
1	259915	260165	vir1_vs_VIRc	3.52041	+	4.95352	2.2878	1.41299
1	266270	266503	vir1_vs_VIRc	3.36592	+	10.7699	2.52719	1.5477
1	266534	266729	vir1_vs_VIRc	1.48674	+	45.3542	2.62622	1.6074
1	266788	267248	vir1_vs_VIRc	1.7739	+	21.1929	3.97234	2.42541
1	267276	267510	vir1_vs_VIRc	1.06054	+	71.7429	2.27674	1.40747
1	268344	268995	vir1_vs_VIRc	1.37922	+	493.593	5.97666	3.84278
1	269082	269645	vir1_vs_VIRc	1.09141	+	732.279	5.13157	3.2025
1	269425	269611	vir1_vs_VIRc	2.443	-	6.2656	2.10148	1.35959
1	270772	270918	vir1_vs_VIRc	2.69098	+	4.52778	1.88321	1.1692
1	271923	272054	vir1_vs_VIRc	-1.27304	-	17.584	1.85661	1.19394
1	273924	274013	vir1_vs_VIRc	1.56377	-	22.437	1.59812	1.01775
1	274489	274679	vir1_vs_VIRc	1.30184	-	21.9084	2.03218	1.31124
1	278595	278809	vir1_vs_VIRc	1.28	+	51.657	2.40554	1.48108
1	279967	280088	vir1_vs_VIRc	1.59363	+	71.8094	1.92048	1.19234
1	284501	286351	vir1_vs_VIRc	1.72823	+	173.97	5.97666	3.84278
1	286452	286623	vir1_vs_VIRc	1.30151	+	204.078	2.84537	1.73054
1	286874	287133	vir1_vs_VIRc	1.29609	+	93.9609	2.63801	1.61319
1	287221	287280	vir1_vs_VIRc	1.20879	+	216.057	1.6989	1.05216
1	287395	287514	vir1_vs_VIRc	1.11581	+	255.394	2.23418	1.3841
1	287642	287710	vir1_vs_VIRc	1.15464	+	214.424	2.36378	1.45859
1	287789	287854	vir1_vs_VIRc	1.37441	+	219.453	2.34777	1.449
1	288086	288176	vir1_vs_VIRc	1.15613	+	297.115	2.09408	1.29428
1	288593	288721	vir1_vs_VIRc	1.08788	+	290.871	2.56454	1.5695
1	288882	289091	vir1_vs_VIRc	1.09875	+	361.763	2.94445	1.78297
1	298741	298855	vir1_vs_VIRc	3.25019	+	4.35072	1.65467	1.02334
1	299472	299662	vir1_vs_VIRc	1.12502	-	52.4498	1.91231	1.2322
1	299723	299872	vir1_vs_VIRc	1.14374	-	67.985	2.02811	1.30857
1	299876	300125	vir1_vs_VIRc	1.24856	-	49.2497	2.81295	1.8363
1	300318	300515	vir1_vs_VIRc	1.34065	-	46.8834	2.63872	1.72077
1	310319	310532	vir1_vs_VIRc	1.70339	+	19.8991	2.46198	1.50997
1	311902	312111	vir1_vs_VIRc	1.25423	+	22.4377	2.07778	1.28429
1	322149	322265	vir1_vs_VIRc	1.18756	-	41.2813	1.69173	1.08111
1	326106	326228	vir1_vs_VIRc	1.31557	+	38.5894	1.89507	1.17651
1	330604	330694	vir1_vs_VIRc	-1.09414	-	19.3919	1.66357	1.0611
1	331533	331664	vir1_vs_VIRc	1.02734	-	151.117	2.36243	1.54072
1	331956	332183	vir1_vs_VIRc	1.19208	-	129.372	3.21514	2.11204
1	332404	332633	vir1_vs_VIRc	1.18317	-	105.987	2.74211	1.79362
1	332857	333045	vir1_vs_VIRc	1.30783	-	106.712	2.39316	1.56029
1	333237	333628	vir1_vs_VIRc	1.35445	-	115.852	3.2588	2.14412
1	333904	334178	vir1_vs_VIRc	1.61784	-	97.2809	3.94974	2.62324
1	334471	334764	vir1_vs_VIRc	1.43272	-	69.5856	3.07801	2.01424
1	334899	335321	vir1_vs_VIRc	1.83601	-	83.4117	4.24094	2.82228
1	335419	335773	vir1_vs_VIRc	1.98789	-	62.3258	4.63565	3.10082
1	335916	336233	vir1_vs_VIRc	2.16858	-	61.2676	4.37682	2.92637
1	336417	337719	vir1_vs_VIRc	1.97232	-	68.5631	6.06701	3.9243
1	338276	338441	vir1_vs_VIRc	1.72796	+	48.7786	3.08849	1.87117
1	346163	346347	vir1_vs_VIRc	1.07478	+	44.9	2.25642	1.39651
1	347901	348050	vir1_vs_VIRc	1.96213	+	15.3039	2.23465	1.3841
1	348373	348454	vir1_vs_VIRc	2.07672	+	22.4543	1.76825	1.0951
1	348562	348640	vir1_vs_VIRc	2.24025	+	25.3207	2.14988	1.32956
1	348735	348785	vir1_vs_VIRc	1.64894	+	22.3562	1.67496	1.03614
1	349264	349366	vir1_vs_VIRc	1.70538	+	27.9733	1.80229	1.11717
1	349596	349720	vir1_vs_VIRc	1.5308	+	29.2047	2.47301	1.51386
1	349803	349886	vir1_vs_VIRc	1.60155	+	28.3869	2.01997	1.25047
1	350226	350296	vir1_vs_VIRc	1.70344	+	32.73	1.88871	1.17278
1	350474	350570	vir1_vs_VIRc	1.43848	+	36.3385	2.13262	1.31768
1	352903	353470	vir1_vs_VIRc	3.55902	+	5.00866	3.36282	2.04696
1	353555	353830	vir1_vs_VIRc	3.68166	+	6.9535	3.0447	1.84523
1	353882	354178	vir1_vs_VIRc	4.23141	+	5.46773	2.69043	1.64248
1	354289	354515	vir1_vs_VIRc	1.93775	+	8.68319	2.90885	1.7614
1	360886	361027	vir1_vs_VIRc	1.30576	-	33.5986	1.65764	1.05715
1	361303	361510	vir1_vs_VIRc	1.56206	-	31.7756	2.46571	1.60839
1	361696	361910	vir1_vs_VIRc	1.83146	-	31.669	2.48009	1.61746
1	361965	363106	vir1_vs_VIRc	1.83816	-	29.2455	5.58989	3.72096
1	373513	373786	vir1_vs_VIRc	2.88477	+	57.4589	3.65652	2.22383
1	373892	374189	vir1_vs_VIRc	2.946	+	52.127	5.27769	3.23399
1	374272	374500	vir1_vs_VIRc	3.14058	+	57.2547	4.45815	2.68825
1	374583	374922	vir1_vs_VIRc	3.10861	+	64.1912	5.27769	3.23399
1	375122	375238	vir1_vs_VIRc	2.66752	+	46.5712	2.95259	1.78615
1	375325	375453	vir1_vs_VIRc	3.53902	+	61.5782	4.80057	2.94093
1	375528	375719	vir1_vs_VIRc	3.37338	+	73.9883	5.97666	3.84278
1	375808	376002	vir1_vs_VIRc	2.47457	+	67.7466	3.99894	2.43983
1	376114	376251	vir1_vs_VIRc	3.05867	+	58.7929	3.49237	2.11799
1	376352	376474	vir1_vs_VIRc	2.67474	+	56.54	3.1794	1.92427
1	376562	376815	vir1_vs_VIRc	2.77945	+	53.6781	3.78077	2.30461
1	376925	377028	vir1_vs_VIRc	2.38721	+	84.2196	2.26326	1.39975
1	377211	377305	vir1_vs_VIRc	2.44708	+	77.143	2.46198	1.50997
1	377391	377615	vir1_vs_VIRc	2.50764	+	89.1533	4.22079	2.54892
1	377881	378036	vir1_vs_VIRc	2.23684	+	86.7115	2.6986	1.64698
1	378117	378191	vir1_vs_VIRc	2.38416	+	77.05	3.33618	2.03229
1	378298	378365	vir1_vs_VIRc	2.47561	+	77.8517	2.64564	1.61778
1	378504	378649	vir1_vs_VIRc	2.56604	+	71.7386	2.73937	1.66683
1	378746	378854	vir1_vs_VIRc	2.68971	+	73.2592	2.48404	1.5204
1	378943	379089	vir1_vs_VIRc	2.52026	+	78.9824	2.90663	1.76051
1	379183	379230	vir1_vs_VIRc	2.50117	+	129.332	1.87064	1.16134
1	379305	379433	vir1_vs_VIRc	2.64302	+	96.0006	2.94364	1.78297
1	379527	379770	vir1_vs_VIRc	2.33435	+	86.4317	3.71899	2.26277
1	379865	380003	vir1_vs_VIRc	2.30574	+	108.55	2.66007	1.62433
1	380086	380174	vir1_vs_VIRc	2.69992	+	99.765	3.02291	1.83156
1	380270	380375	vir1_vs_VIRc	2.64027	+	101.294	3.64021	2.21375
1	380602	380697	vir1_vs_VIRc	2.20953	+	102.119	2.95589	1.78865
1	380845	380999	vir1_vs_VIRc	1.68926	+	115.07	2.44839	1.50075
1	381150	381332	vir1_vs_VIRc	1.8183	+	114.222	3.07521	1.86303
1	381405	381634	vir1_vs_VIRc	1.93384	+	131.072	2.88853	1.75223
1	381730	381832	vir1_vs_VIRc	1.89558	+	137.348	2.73041	1.66076
1	381912	382040	vir1_vs_VIRc	1.67643	+	119.77	2.74392	1.66928
1	382373	382567	vir1_vs_VIRc	1.86003	+	149.182	3.35238	2.04185
1	382803	382974	vir1_vs_VIRc	2.03313	+	97.1923	3.5405	2.14664
1	382978	383130	vir1_vs_VIRc	2.00138	+	94.5223	2.50085	1.53038
1	383395	383529	vir1_vs_VIRc	1.92916	+	130.327	3.99894	2.43983
1	383608	383688	vir1_vs_VIRc	1.84137	+	108.212	2.69269	1.64292
1	384084	384230	vir1_vs_VIRc	1.49942	+	114.591	2.55754	1.56645
1	384317	384449	vir1_vs_VIRc	1.37502	+	125.01	1.94862	1.20955
1	384694	384840	vir1_vs_VIRc	1.24172	+	226.905	2.37667	1.46697
1	384907	384969	vir1_vs_VIRc	1.4963	+	273.574	2.19656	1.35839
1	385171	385324	vir1_vs_VIRc	1.19828	+	211.176	2.18448	1.35005
1	389817	389943	vir1_vs_VIRc	1.14641	+	120.279	2.0678	1.27786
1	392860	393266	vir1_vs_VIRc	1.28892	+	47.1867	2.88995	1.75253
1	393293	393712	vir1_vs_VIRc	1.09832	+	78.8425	4.28647	2.59427
1	394251	394392	vir1_vs_VIRc	1.27644	+	97.6068	2.15339	1.33135
1	395528	395946	vir1_vs_VIRc	1.57223	+	110.374	4.00818	2.43983
1	396029	396088	vir1_vs_VIRc	1.48898	+	187.257	1.80655	1.11936
1	396439	396534	vir1_vs_VIRc	1.1734	+	211.451	1.76063	1.09049
1	396609	396731	vir1_vs_VIRc	1.05322	+	288.787	2.19383	1.35641
1	396941	397098	vir1_vs_VIRc	1.21021	+	200.006	2.46814	1.51158
1	397330	397567	vir1_vs_VIRc	1.79702	+	24.1425	2.91333	1.76263
1	398065	398151	vir1_vs_VIRc	1.06078	+	256.099	1.79468	1.11257
1	404757	404842	vir1_vs_VIRc	1.51214	+	83.064	1.97394	1.22319
1	404872	404953	vir1_vs_VIRc	1.63394	+	48.5051	1.87647	1.1652
1	405065	405111	vir1_vs_VIRc	1.57608	+	73.984	1.99191	1.23412
1	405230	405316	vir1_vs_VIRc	1.26107	+	61.0632	1.72734	1.06885
1	408726	409140	vir1_vs_VIRc	1.05841	+	373.3	4.86272	2.99511
1	412928	413003	vir1_vs_VIRc	4.29403	-	3.1875	2.30216	1.50098
1	413080	413170	vir1_vs_VIRc	4.61247	-	3.38095	2.42962	1.58657
1	419778	419888	vir1_vs_VIRc	2.49347	-	4.83408	1.83207	1.17678
1	428805	429099	vir1_vs_VIRc	1.72187	-	34.0466	4.4138	2.94218
1	429248	429370	vir1_vs_VIRc	1.75145	-	38.7967	3.53172	2.3338
1	429462	429997	vir1_vs_VIRc	2.12587	-	22.7965	5.22191	3.55501
1	430069	430316	vir1_vs_VIRc	2.10066	-	31.9795	4.19195	2.79066
1	430414	430651	vir1_vs_VIRc	2.00472	-	34.1667	2.82721	1.846
1	435161	435259	vir1_vs_VIRc	2.56816	-	7.05303	1.65777	1.05715
1	441609	441819	vir1_vs_VIRc	1.29428	-	47.0103	2.5883	1.6894
1	441873	442137	vir1_vs_VIRc	1.16554	-	43.0138	3.18335	2.0917
1	442139	442439	vir1_vs_VIRc	1.43347	-	35.5545	2.71425	1.77431
1	442441	442620	vir1_vs_VIRc	1.97629	-	27.7194	2.63356	1.71707
1	442718	442822	vir1_vs_VIRc	1.7012	-	26.9984	2.79773	1.82836
1	448472	448733	vir1_vs_VIRc	-1.00777	-	217.311	4.63565	3.10082
1	450494	450667	vir1_vs_VIRc	-1.15469	-	31.8635	1.95896	1.26312
1	451312	451723	vir1_vs_VIRc	1.41904	-	42.0556	3.35017	2.20215
1	460501	460635	vir1_vs_VIRc	2.80077	-	6.63025	2.85884	1.86504
1	465669	466256	vir1_vs_VIRc	-1.26298	-	615.258	6.06701	3.9243
1	466330	466503	vir1_vs_VIRc	-1.02026	-	29.7969	2.19655	1.42549
1	466732	466801	vir1_vs_VIRc	-1.03508	-	753.483	2.96355	1.93942
1	469852	470156	vir1_vs_VIRc	-1.20661	+	46.1486	3.57699	2.16591
1	470267	470482	vir1_vs_VIRc	-1.66813	+	54.4641	3.98989	2.43325
1	470574	470865	vir1_vs_VIRc	-2.16714	+	69.2591	4.4853	2.69904
1	471134	471497	vir1_vs_VIRc	-1.17154	-	526.363	6.06701	3.9243
1	472301	472448	vir1_vs_VIRc	1.33059	-	37.6622	1.81244	1.16348
1	472668	473112	vir1_vs_VIRc	1.81304	-	28.5419	3.88804	2.58338
1	477716	478303	vir1_vs_VIRc	-1.45261	+	49.2234	4.3856	2.65457
1	478525	478669	vir1_vs_VIRc	-1.86683	+	59.9661	3.79769	2.31743
1	478697	479018	vir1_vs_VIRc	-2.4014	+	26.8986	3.80348	2.31783
1	481484	481601	vir1_vs_VIRc	4.23279	-	3.31427	2.06127	1.33165
1	493605	493778	vir1_vs_VIRc	2.5239	+	13.7193	2.74088	1.66689
1	494262	494607	vir1_vs_VIRc	1.60073	+	13.3724	3.04674	1.84553
1	505923	506052	vir1_vs_VIRc	2.95512	-	5.08462	2.3307	1.52056
1	506137	506184	vir1_vs_VIRc	2.81524	-	5.81944	2.16725	1.40702
1	506367	506404	vir1_vs_VIRc	2.95009	-	4.99561	2.11709	1.37004
1	513158	513246	vir1_vs_VIRc	1.99067	-	14.4569	1.94431	1.25306
1	514892	514944	vir1_vs_VIRc	2.65588	+	3.94969	1.99798	1.23832
1	518263	518378	vir1_vs_VIRc	1.19297	+	1287.23	3.50099	2.12077
1	519585	519728	vir1_vs_VIRc	3.97955	-	4.78588	1.74939	1.12084
1	519785	519916	vir1_vs_VIRc	2.55877	-	5.52146	1.84772	1.18821
1	519967	520169	vir1_vs_VIRc	1.37542	-	21.695	2.14113	1.38735
1	524247	524436	vir1_vs_VIRc	2.36344	+	6.20526	1.98904	1.2332
1	524662	524837	vir1_vs_VIRc	3.25378	+	5.81818	2.25924	1.39792
1	524917	525101	vir1_vs_VIRc	3.19232	+	8.14459	2.63286	1.61192
1	525262	525462	vir1_vs_VIRc	3.17254	+	8.91169	2.7605	1.68114
1	525546	526054	vir1_vs_VIRc	3.92172	+	6.63867	4.22079	2.54892
1	526339	526633	vir1_vs_VIRc	2.92419	+	7.65621	3.19635	1.92928
1	526651	526961	vir1_vs_VIRc	3.18728	+	8.85477	2.89785	1.75515
1	526986	527202	vir1_vs_VIRc	3.6645	+	7.9328	3.90112	2.38074
1	527347	527577	vir1_vs_VIRc	3.00412	+	11.5325	2.77773	1.6925
1	527658	527921	vir1_vs_VIRc	2.45795	+	13.2614	2.51532	1.54165
1	528392	528660	vir1_vs_VIRc	2.04283	+	16.6369	2.54098	1.55534
1	553029	553495	vir1_vs_VIRc	-1.98299	-	126.682	6.06701	3.9243
1	553500	553678	vir1_vs_VIRc	-1.69539	-	120.278	3.59719	2.38136
1	554472	554613	vir1_vs_VIRc	-1.74629	-	229.611	4.19195	2.79066
1	554796	554863	vir1_vs_VIRc	-1.72956	-	225.588	2.55714	1.6697
1	555572	555644	vir1_vs_VIRc	-1.59016	-	228.104	3.01586	1.97084
1	555726	556027	vir1_vs_VIRc	-1.40544	-	165.862	4.63565	3.10082
1	556993	557439	vir1_vs_VIRc	-1.98981	-	12.7744	3.79055	2.51153
1	557493	557622	vir1_vs_VIRc	-1.77857	-	8.66859	1.80797	1.1602
1	557991	558120	vir1_vs_VIRc	-3.07055	-	7.87628	1.84688	1.18763
1	558209	558325	vir1_vs_VIRc	-2.09051	-	11.5705	1.87592	1.20719
1	558240	558899	vir1_vs_VIRc	-2.49414	+	15.0092	4.45815	2.68825
1	558493	558613	vir1_vs_VIRc	-2.14065	-	7.37672	1.69563	1.08395
1	565784	565953	vir1_vs_VIRc	-1.38134	+	78.7397	2.9771	1.80462
1	566043	566141	vir1_vs_VIRc	-1.44829	+	100.72	2.24131	1.38861
1	566226	567728	vir1_vs_VIRc	-1.87619	+	146.442	5.97666	3.84278
1	569644	569825	vir1_vs_VIRc	-1.13153	+	16.6149	1.96964	1.22114
1	571983	572759	vir1_vs_VIRc	-1.14956	-	247.861	5.58989	3.72096
1	588337	588484	vir1_vs_VIRc	2.49008	-	5.39583	1.98845	1.28343
1	588963	589207	vir1_vs_VIRc	1.99798	-	6.38061	2.83224	1.84873
1	592048	592262	vir1_vs_VIRc	1.71325	+	24.1713	2.32143	1.43565
1	596034	596308	vir1_vs_VIRc	1.261	-	38.6864	2.57719	1.68351
1	596572	597382	vir1_vs_VIRc	1.76532	-	31.2507	5.02562	3.4052
1	597521	597662	vir1_vs_VIRc	1.95307	-	37.9208	2.68807	1.75723
1	597805	598627	vir1_vs_VIRc	1.68212	-	23.0198	4.83656	3.27435
1	606191	606276	vir1_vs_VIRc	2.59423	-	11.4651	1.83572	1.17974
1	607811	607894	vir1_vs_VIRc	1.23324	-	33.3433	2.08253	1.34551
1	618572	618828	vir1_vs_VIRc	2.14744	+	18.082	2.58064	1.58024
1	618842	619045	vir1_vs_VIRc	1.67848	+	13.1622	1.97256	1.22258
1	619048	619202	vir1_vs_VIRc	1.54564	+	10.7634	1.85691	1.15171
1	619639	619789	vir1_vs_VIRc	1.84146	+	13.8372	2.06206	1.2753
1	630501	630896	vir1_vs_VIRc	2.22631	+	183.306	5.97666	3.84278
1	630977	631033	vir1_vs_VIRc	2.0359	+	446.186	3.76984	2.29855
1	631103	631181	vir1_vs_VIRc	2.06317	+	432.734	3.73862	2.2781
1	631265	631337	vir1_vs_VIRc	2.05333	+	408.663	3.14736	1.90362
1	631431	632348	vir1_vs_VIRc	1.70337	+	349.965	5.97666	3.84278
1	632215	632348	vir1_vs_VIRc	2.20921	-	9.14988	2.08851	1.34964
1	632421	632449	vir1_vs_VIRc	1.35178	+	676.882	2.5642	1.5695
1	632528	632806	vir1_vs_VIRc	1.16367	+	455.101	4.09017	2.47806
1	632948	633097	vir1_vs_VIRc	2.15163	-	14.455	2.15431	1.39691
1	636591	636729	vir1_vs_VIRc	-1.24151	+	175.456	4.13782	2.5016
1	636828	636886	vir1_vs_VIRc	-1.49069	+	199.284	2.88219	1.74835
1	636978	637235	vir1_vs_VIRc	-1.40566	+	96.9635	3.88676	2.37177
1	646567	646689	vir1_vs_VIRc	1.09928	-	231.747	3.45317	2.27607
1	646777	646956	vir1_vs_VIRc	1.12628	-	222.862	2.97324	1.94612
1	647038	647107	vir1_vs_VIRc	1.41207	-	199.574	2.46441	1.6075
1	647184	647280	vir1_vs_VIRc	1.257	-	216.499	2.24714	1.46119
1	647367	647442	vir1_vs_VIRc	1.13373	-	213.829	1.59735	1.01741
1	647530	647631	vir1_vs_VIRc	1.21667	-	201.243	2.29535	1.49536
1	647703	647807	vir1_vs_VIRc	1.40432	-	192.633	2.97394	1.94637
1	647924	647995	vir1_vs_VIRc	1.40855	-	212.421	2.179	1.4147
1	648102	648275	vir1_vs_VIRc	1.42263	-	172.524	3.05799	1.99996
1	648362	648432	vir1_vs_VIRc	1.19477	-	124.325	1.73629	1.11239
1	648508	648656	vir1_vs_VIRc	1.50894	-	111.674	3.24813	2.13509
1	648766	648829	vir1_vs_VIRc	1.76798	-	141.885	2.53874	1.65862
1	648911	649139	vir1_vs_VIRc	1.80407	-	152.329	3.72262	2.46067
1	649368	649460	vir1_vs_VIRc	1.67765	-	152.419	2.86589	1.8693
1	649551	649675	vir1_vs_VIRc	1.7551	-	130.918	2.5786	1.68415
1	649589	649675	vir1_vs_VIRc	3.55459	+	3.66379	1.72355	1.06661
1	649762	650438	vir1_vs_VIRc	1.72132	-	125.604	6.06701	3.9243
1	650563	650709	vir1_vs_VIRc	1.95554	-	98.5374	4.06269	2.70428
1	650791	650904	vir1_vs_VIRc	1.97632	-	97.5936	4.10797	2.74763
1	651128	651219	vir1_vs_VIRc	1.79595	-	102.274	2.74211	1.79362
1	651320	651539	vir1_vs_VIRc	2.18654	-	119.44	4.39491	2.93279
1	651710	651885	vir1_vs_VIRc	2.08155	-	109.134	4.00631	2.66892
1	656910	657036	vir1_vs_VIRc	4.11718	+	3.13123	1.84688	1.14457
1	658649	659317	vir1_vs_VIRc	3.27277	-	481.435	6.06701	3.9243
1	659002	659124	vir1_vs_VIRc	4.40806	+	3.46409	1.93928	1.20386
1	659423	659471	vir1_vs_VIRc	3.76332	-	574.537	2.50105	1.63201
1	659556	659790	vir1_vs_VIRc	3.63153	-	452.079	4.83656	3.27435
1	661175	661791	vir1_vs_VIRc	2.74635	-	390.523	6.06701	3.9243
1	661901	661949	vir1_vs_VIRc	3.28859	-	448.065	2.84508	1.8557
1	662042	662379	vir1_vs_VIRc	3.25842	-	299.219	5.22191	3.55501
1	668381	668468	vir1_vs_VIRc	1.23567	-	60.0833	2.97746	1.94643
1	668613	668727	vir1_vs_VIRc	1.07326	-	57.4319	2.01513	1.29955
1	683851	684113	vir1_vs_VIRc	1.21111	-	55.9312	2.42822	1.58605
1	684239	684425	vir1_vs_VIRc	1.32191	-	63.4626	2.46009	1.6053
1	684864	685266	vir1_vs_VIRc	1.17983	-	46.341	3.19602	2.10088
1	685297	685540	vir1_vs_VIRc	1.34512	-	37.029	3.56322	2.3545
1	685617	685965	vir1_vs_VIRc	1.43369	-	40.7521	3.42061	2.25002
1	686056	686424	vir1_vs_VIRc	1.71816	-	35.6477	3.48155	2.2958
1	686505	686605	vir1_vs_VIRc	1.54506	-	39.854	1.72268	1.10304
1	686679	686751	vir1_vs_VIRc	1.88896	-	35.9326	1.75868	1.12665
1	686844	687248	vir1_vs_VIRc	2.72043	-	21.3195	5.02562	3.4052
1	690757	690898	vir1_vs_VIRc	1.16205	-	76.4484	2.21901	1.44073
1	691121	691310	vir1_vs_VIRc	1.31832	-	56.4579	2.35596	1.53686
1	691457	692078	vir1_vs_VIRc	1.30396	-	52.9506	4.02169	2.67844
1	692175	692310	vir1_vs_VIRc	1.26024	-	62.2543	1.78387	1.14393
1	710027	710136	vir1_vs_VIRc	-1.17513	-	34.3955	2.47606	1.61538
1	712943	713284	vir1_vs_VIRc	1.06905	-	72.0975	3.04294	1.99001
1	713348	713682	vir1_vs_VIRc	1.18276	-	79.0592	3.23006	2.12138
1	713775	714206	vir1_vs_VIRc	1.57022	-	66.0565	3.4793	2.2958
1	714317	714463	vir1_vs_VIRc	1.55018	-	46.7704	2.69465	1.76116
1	714558	714864	vir1_vs_VIRc	1.39573	-	40.0204	3.6405	2.40646
1	715007	715315	vir1_vs_VIRc	1.5573	-	40.784	4.2541	2.82228
1	715660	718662	vir1_vs_VIRc	2.15095	-	30.4334	6.06701	3.9243
1	718973	720585	vir1_vs_VIRc	2.90885	-	25.2101	6.06701	3.9243
1	720681	721795	vir1_vs_VIRc	3.19636	-	18.9637	6.06701	3.9243
1	721905	722007	vir1_vs_VIRc	3.72859	-	13.5987	3.65037	2.4127
1	722116	722815	vir1_vs_VIRc	4.00019	-	16.322	6.06701	3.9243
1	722966	724119	vir1_vs_VIRc	3.49678	-	14.6321	6.06701	3.9243
1	724275	724389	vir1_vs_VIRc	3.6392	-	14.2986	3.30584	2.17925
1	724681	724746	vir1_vs_VIRc	4.58878	-	12.4369	2.69539	1.76142
1	724890	725081	vir1_vs_VIRc	3.39601	-	11.612	2.95074	1.93061
1	725236	725409	vir1_vs_VIRc	2.98174	-	12.2026	3.33382	2.19441
1	725552	725608	vir1_vs_VIRc	3.89323	-	15.4181	2.79032	1.82252
1	725689	725824	vir1_vs_VIRc	3.45242	-	17.2978	3.65708	2.4177
1	726037	726122	vir1_vs_VIRc	2.71645	-	14.8663	2.28533	1.48867
1	726275	726344	vir1_vs_VIRc	3.02722	-	9.01071	1.75907	1.1268
1	726710	727249	vir1_vs_VIRc	3.01256	-	9.80478	5.11277	3.46192
1	733122	733517	vir1_vs_VIRc	1.14455	-	113.277	4.89092	3.31248
1	734341	734531	vir1_vs_VIRc	1.39109	-	67.5428	2.03058	1.31052
1	734430	734585	vir1_vs_VIRc	8.62124	+	3.79594	2.04719	1.26599
1	734620	737081	vir1_vs_VIRc	1.7838	-	60.9597	6.06701	3.9243
1	737233	737437	vir1_vs_VIRc	1.43514	-	56.5476	2.68734	1.75699
1	737561	737624	vir1_vs_VIRc	2.16857	-	37.3398	1.68419	1.0761
1	740556	740617	vir1_vs_VIRc	-2.04148	+	5.89382	1.82939	1.13389
1	743300	743546	vir1_vs_VIRc	-1.03692	+	436.923	5.49954	3.44049
1	743619	743716	vir1_vs_VIRc	-1.19228	+	413.83	3.52488	2.13772
1	743815	744090	vir1_vs_VIRc	-1.69292	+	163.842	5.13157	3.2025
1	744833	744976	vir1_vs_VIRc	1.4668	-	15.5116	2.03339	1.31222
1	745641	745747	vir1_vs_VIRc	1.78864	-	5.30841	2.04364	1.31972
1	753842	753983	vir1_vs_VIRc	1.87206	+	10.2729	2.08374	1.2881
1	753988	754112	vir1_vs_VIRc	3.38435	+	12.1973	1.6957	1.04989
1	761291	761810	vir1_vs_VIRc	1.32213	+	96.7125	4.03715	2.44892
1	761886	762391	vir1_vs_VIRc	1.41659	+	105.022	3.93924	2.40462
1	763013	763210	vir1_vs_VIRc	1.29766	+	103.47	2.91333	1.76263
1	763299	763412	vir1_vs_VIRc	1.15488	+	85.2069	2.36675	1.46025
1	775969	776061	vir1_vs_VIRc	1.15727	+	18.8235	1.68408	1.04181
1	776539	776762	vir1_vs_VIRc	1.38102	+	22.9319	2.65135	1.6216
1	777154	777237	vir1_vs_VIRc	1.46742	+	28.4861	1.72296	1.0662
1	777336	777474	vir1_vs_VIRc	1.31936	+	33.4886	1.85863	1.15253
1	777476	777689	vir1_vs_VIRc	1.18449	+	37.6682	2.27467	1.40745
1	787135	788142	vir1_vs_VIRc	1.10418	+	721.977	5.49954	3.44049
1	788526	788611	vir1_vs_VIRc	1.09011	+	58.47	1.93146	1.19907
1	790083	790708	vir1_vs_VIRc	1.26965	+	129.693	3.51277	2.12827
1	810887	811122	vir1_vs_VIRc	-1.35939	-	23.4986	2.51059	1.63915
1	811136	811351	vir1_vs_VIRc	-1.20369	-	35.6925	2.5526	1.66624
1	813481	813604	vir1_vs_VIRc	2.03625	+	57.1035	2.91034	1.7614
1	813929	815300	vir1_vs_VIRc	1.29607	+	104.512	5.97666	3.84278
1	817994	818280	vir1_vs_VIRc	-1.1653	-	184.019	5.11277	3.46192
1	826593	826737	vir1_vs_VIRc	1.07747	+	50.6287	1.7347	1.07339
1	827304	827616	vir1_vs_VIRc	1.4872	+	39.4755	2.62352	1.60675
1	827618	827986	vir1_vs_VIRc	1.45102	+	43.1529	2.7934	1.70309
1	828661	828777	vir1_vs_VIRc	4.35791	-	3.03276	1.71698	1.09902
1	830608	830925	vir1_vs_VIRc	1.92997	+	26.9505	2.73988	1.66683
1	830929	831313	vir1_vs_VIRc	2.17833	+	24.9712	3.11753	1.8872
1	831420	832145	vir1_vs_VIRc	1.96858	+	26.6374	4.09017	2.47806
1	832254	832640	vir1_vs_VIRc	1.71396	+	35.8191	2.7424	1.66809
1	832753	832935	vir1_vs_VIRc	1.38773	+	41.8256	2.26259	1.39957
1	833694	833850	vir1_vs_VIRc	1.26292	+	46.8015	1.94578	1.20776
1	834578	834787	vir1_vs_VIRc	1.0674	+	81.546	2.65631	1.62274
1	835865	836328	vir1_vs_VIRc	1.80263	+	96.5162	4.93527	3.03532
1	836769	837233	vir1_vs_VIRc	1.76742	+	91.0072	4.57872	2.76405
1	837471	837908	vir1_vs_VIRc	1.68411	+	119.911	4.86272	2.99511
1	838069	838314	vir1_vs_VIRc	1.48334	+	119	3.24508	1.96417
1	838400	838784	vir1_vs_VIRc	1.33062	+	119.65	3.34018	2.03381
1	838798	839227	vir1_vs_VIRc	1.11205	+	143.594	3.04166	1.84284
1	839312	839469	vir1_vs_VIRc	1.14182	+	133.014	2.39631	1.47641
1	839678	839806	vir1_vs_VIRc	1.18679	+	149.532	2.32297	1.43635
1	839920	840089	vir1_vs_VIRc	1.01495	+	172.002	2.10655	1.30138
1	844507	844716	vir1_vs_VIRc	-1.48885	-	19.4456	1.9709	1.27142
1	852403	852568	vir1_vs_VIRc	1.77334	+	20.4819	2.37711	1.46697
1	852676	853538	vir1_vs_VIRc	1.13248	+	123.281	4.25239	2.57537
1	853121	853311	vir1_vs_VIRc	1.56948	-	24.3272	2.0738	1.33992
1	862314	862393	vir1_vs_VIRc	-1.23497	-	23.6021	1.88275	1.21225
1	863890	864088	vir1_vs_VIRc	-1.33926	-	32.0691	2.01305	1.29857
1	869454	869552	vir1_vs_VIRc	1.62988	+	16.8207	2.05566	1.27106
1	873776	873927	vir1_vs_VIRc	2.9814	+	3.95121	1.72632	1.06841
1	879844	880064	vir1_vs_VIRc	1.47515	-	27.259	2.20399	1.43018
1	881574	881669	vir1_vs_VIRc	1.28474	-	46.0243	2.22584	1.4457
1	884168	884523	vir1_vs_VIRc	2.05965	+	8.57725	3.17664	1.92176
1	885423	885514	vir1_vs_VIRc	1.86661	+	6.26721	1.71206	1.06016
1	888048	888197	vir1_vs_VIRc	1.11482	-	35.7828	2.08118	1.34447
1	891483	891659	vir1_vs_VIRc	1.07931	-	28.2166	1.83511	1.17938
1	893753	893950	vir1_vs_VIRc	-1.08814	+	51.9196	2.52811	1.5485
1	898956	899111	vir1_vs_VIRc	-1.18187	-	9.51976	2.04736	1.32179
1	902170	903006	vir1_vs_VIRc	-1.35305	+	440.508	5.97666	3.84278
1	918338	918488	vir1_vs_VIRc	1.13613	+	33.7969	2.31533	1.43132
1	918868	919008	vir1_vs_VIRc	1.03608	+	38.9462	1.90881	1.18546
1	923469	923755	vir1_vs_VIRc	3.20337	+	8.04965	2.78661	1.69866
1	923828	923949	vir1_vs_VIRc	2.25352	+	7.36817	1.66345	1.02888
1	924093	924312	vir1_vs_VIRc	2.46291	+	8.37348	2.31024	1.42811
1	933531	934144	vir1_vs_VIRc	1.36955	+	42.2338	2.98235	1.80824
1	934199	934708	vir1_vs_VIRc	1.40217	+	62.1654	3.54691	2.1483
1	934785	934939	vir1_vs_VIRc	1.6041	+	57.7317	2.2811	1.41015
1	934947	935069	vir1_vs_VIRc	1.38483	+	58.0224	2.17767	1.34648
1	935164	935288	vir1_vs_VIRc	1.24116	+	50.9787	1.95851	1.21509
1	935882	936038	vir1_vs_VIRc	1.17892	+	75.4082	2.09238	1.29343
1	936189	936397	vir1_vs_VIRc	1.05878	+	97.2747	2.31856	1.43363
1	938086	938174	vir1_vs_VIRc	1.51728	+	13.5983	1.71753	1.0636
1	938883	939631	vir1_vs_VIRc	1.88109	+	14.4419	3.93924	2.40462
1	949297	949452	vir1_vs_VIRc	1.8192	-	9.76656	1.91906	1.237
1	950698	950794	vir1_vs_VIRc	2.40431	-	13.5447	1.67993	1.07315
1	950881	951041	vir1_vs_VIRc	2.12139	-	10.0652	2.80623	1.83224
1	951126	951211	vir1_vs_VIRc	2.08189	-	8.81395	2.02867	1.30898
1	951528	951766	vir1_vs_VIRc	2.1401	-	11.3853	3.45956	2.2814
1	964739	964847	vir1_vs_VIRc	2.00721	-	15.8853	1.75532	1.12503
1	966446	966648	vir1_vs_VIRc	2.72253	-	13.6593	3.11909	2.04399
1	982521	983195	vir1_vs_VIRc	-1.45127	-	979.237	5.58989	3.72096
1	982575	982774	vir1_vs_VIRc	-1.42167	+	14.6438	2.3659	1.45962
1	982936	983337	vir1_vs_VIRc	-1.23154	+	24.1084	2.84281	1.73054
1	1001901	1002067	vir1_vs_VIRc	2.61722	+	5.2485	2.18998	1.35419
1	1005048	1005336	vir1_vs_VIRc	1.10032	+	64.9446	2.32452	1.43716
1	1005991	1006074	vir1_vs_VIRc	1.00589	+	78.8244	1.63715	1.01321
1	1010014	1010118	vir1_vs_VIRc	1.35869	+	23.4579	1.89557	1.1768
1	1010053	1010275	vir1_vs_VIRc	2.95525	-	4.9275	2.46506	1.60794
1	1010452	1010915	vir1_vs_VIRc	4.36522	-	4.956	3.84953	2.55967
1	1013739	1013964	vir1_vs_VIRc	2.03462	+	16.2142	2.87457	1.74622
1	1014082	1014237	vir1_vs_VIRc	1.48824	+	21.3285	2.10271	1.29918
1	1014334	1014543	vir1_vs_VIRc	1.93214	+	29.8567	2.7032	1.64912
1	1014767	1014872	vir1_vs_VIRc	1.61795	+	27.0173	1.88055	1.16739
1	1014951	1015050	vir1_vs_VIRc	1.47953	+	30.4917	1.75658	1.08784
1	1015199	1015304	vir1_vs_VIRc	1.54992	+	27.2398	2.22747	1.37913
1	1027292	1027564	vir1_vs_VIRc	2.43249	-	7.57204	2.26226	1.47094
1	1028299	1029102	vir1_vs_VIRc	1.06763	-	107.081	5.58989	3.72096
1	1034886	1035055	vir1_vs_VIRc	1.64229	-	14.4701	3.0213	1.97502
1	1035142	1035284	vir1_vs_VIRc	2.34008	-	13.116	2.49263	1.62588
1	1035383	1035518	vir1_vs_VIRc	2.46147	-	14.5827	2.79914	1.8289
1	1035886	1036067	vir1_vs_VIRc	1.9049	-	17.0023	2.07583	1.34119
1	1037089	1037266	vir1_vs_VIRc	1.99744	+	14.1816	2.57166	1.57466
1	1037598	1037746	vir1_vs_VIRc	1.97431	+	18	1.6575	1.02545
1	1038055	1038175	vir1_vs_VIRc	2.01328	+	16.3147	1.86275	1.15547
1	1038276	1038376	vir1_vs_VIRc	2.13442	+	19.2096	2.29842	1.42053
1	1038519	1038611	vir1_vs_VIRc	1.88548	+	19.1703	1.92301	1.19392
1	1043252	1043356	vir1_vs_VIRc	-5.43648	-	3.79762	1.8702	1.20343
1	1051367	1051491	vir1_vs_VIRc	1.80982	+	129.775	2.89496	1.75434
1	1051768	1052038	vir1_vs_VIRc	1.5722	+	166.291	4.13782	2.5016
1	1052160	1052269	vir1_vs_VIRc	1.16225	+	191.955	2.30374	1.4243
1	1052546	1052821	vir1_vs_VIRc	1.40221	+	202.166	3.18218	1.92582
1	1052856	1053123	vir1_vs_VIRc	1.27735	+	33.1608	2.71114	1.6524
1	1053327	1053494	vir1_vs_VIRc	1.21371	+	209.029	2.77718	1.6925
1	1053807	1054806	vir1_vs_VIRc	1.08332	+	148.061	4.93527	3.03532
1	1063363	1063474	vir1_vs_VIRc	2.77151	-	4.37426	2.53874	1.65862
1	1066231	1066525	vir1_vs_VIRc	1.53181	-	115.986	4.47595	2.9942
1	1066607	1066771	vir1_vs_VIRc	1.53069	-	120.533	4.83656	3.27435
1	1066852	1067551	vir1_vs_VIRc	1.60838	-	91.8025	5.58989	3.72096
1	1067622	1067676	vir1_vs_VIRc	3.71232	-	13.7227	1.65142	1.05283
1	1067763	1067849	vir1_vs_VIRc	1.84073	-	88.7155	2.07177	1.33858
1	1067927	1068247	vir1_vs_VIRc	1.67139	-	100.279	4.24094	2.82228
1	1068357	1070494	vir1_vs_VIRc	2.06351	-	63.4868	6.06701	3.9243
1	1070688	1070904	vir1_vs_VIRc	2.15389	-	39.8429	3.51924	2.32574
1	1075371	1075513	vir1_vs_VIRc	-1.11619	+	26.5565	2.0781	1.28445
1	1077959	1078353	vir1_vs_VIRc	1.21368	-	218.618	4.37682	2.92637
1	1078427	1078552	vir1_vs_VIRc	1.2798	-	268.803	2.81005	1.8346
1	1078682	1078749	vir1_vs_VIRc	1.49145	-	227.012	2.59265	1.69051
1	1078838	1078946	vir1_vs_VIRc	1.51528	-	214.872	2.79867	1.8289
1	1079246	1079330	vir1_vs_VIRc	1.38984	-	185.707	2.11621	1.36932
1	1079410	1079526	vir1_vs_VIRc	1.39194	-	196.204	2.8583	1.86478
1	1079621	1079779	vir1_vs_VIRc	1.29597	-	232.667	2.82872	1.84642
1	1080233	1080572	vir1_vs_VIRc	1.47031	-	157.548	3.79055	2.51153
1	1086274	1086497	vir1_vs_VIRc	2.66209	+	5.92522	2.48769	1.52178
1	1087370	1087513	vir1_vs_VIRc	3.02268	+	7.875	1.97967	1.22716
1	1089121	1089267	vir1_vs_VIRc	2.38002	+	6.60998	2.42778	1.49268
1	1089393	1089467	vir1_vs_VIRc	2.44816	+	6.12	1.73925	1.07657
1	1090815	1090982	vir1_vs_VIRc	2.1367	+	8.49256	2.24937	1.39316
1	1091074	1091205	vir1_vs_VIRc	3.46321	+	11.8314	2.38106	1.46736
1	1091304	1091349	vir1_vs_VIRc	2.47146	+	12.7482	1.85639	1.15153
1	1092008	1092131	vir1_vs_VIRc	1.65789	+	7.70228	2.0745	1.28192
1	1093336	1093450	vir1_vs_VIRc	1.70692	+	16.8978	1.75112	1.08435
1	1114378	1115192	vir1_vs_VIRc	1.75189	+	67.6019	4.57872	2.76405
1	1115557	1115821	vir1_vs_VIRc	1.73294	+	74.7299	3.03865	1.84268
1	1115938	1116100	vir1_vs_VIRc	1.35573	+	87	2.81321	1.71477
1	1116226	1116962	vir1_vs_VIRc	1.20219	+	95.2097	4.17732	2.50865
1	1117053	1117482	vir1_vs_VIRc	1.33705	+	122.387	4.5453	2.74721
1	1120304	1120671	vir1_vs_VIRc	1.27999	-	63.2511	4.14793	2.75682
1	1121320	1121570	vir1_vs_VIRc	3.92025	-	5.52988	2.99697	1.95908
1	1121716	1121901	vir1_vs_VIRc	1.55325	-	45.888	2.78712	1.82192
1	1122021	1122292	vir1_vs_VIRc	1.70241	-	43.9105	2.85884	1.86504
1	1128214	1129052	vir1_vs_VIRc	-1.14915	-	313.009	6.06701	3.9243
1	1129135	1129402	vir1_vs_VIRc	-1.0012	-	421.539	5.58989	3.72096
1	1145533	1145720	vir1_vs_VIRc	1.0721	-	174.666	3.685	2.43822
1	1146141	1146235	vir1_vs_VIRc	1.05238	-	202.918	2.04257	1.31902
1	1146237	1146374	vir1_vs_VIRc	1.08701	-	150.932	1.9751	1.27427
1	1146523	1146668	vir1_vs_VIRc	1.51832	-	59.9692	2.25955	1.46962
1	1150215	1150319	vir1_vs_VIRc	1.08335	-	142.818	1.86772	1.20167
1	1150545	1150715	vir1_vs_VIRc	1.15732	-	95.3699	2.48941	1.624
1	1151654	1151853	vir1_vs_VIRc	1.19143	-	143.172	2.82175	1.84202
1	1152317	1152475	vir1_vs_VIRc	1.45961	-	156.013	2.51764	1.64337
1	1152677	1152809	vir1_vs_VIRc	1.23926	-	104.517	2.02189	1.30404
1	1153036	1153124	vir1_vs_VIRc	1.37113	-	54.2912	1.83252	1.17717
1	1153718	1153940	vir1_vs_VIRc	1.53887	-	83.429	2.86589	1.8693
1	1161576	1161899	vir1_vs_VIRc	-1.14555	-	16.5862	4.49881	2.9983
1	1165204	1166194	vir1_vs_VIRc	1.06033	+	402	5.97666	3.84278
1	1165873	1166047	vir1_vs_VIRc	2.64868	-	6.15952	2.43364	1.58911
1	1167517	1167658	vir1_vs_VIRc	-1.29858	-	17.8556	1.79413	1.15106
1	1181938	1182376	vir1_vs_VIRc	1.57304	-	24.8254	3.93668	2.61552
1	1182454	1182587	vir1_vs_VIRc	1.74673	-	18.4614	2.32452	1.51679
1	1182691	1182899	vir1_vs_VIRc	1.90068	-	22.7333	2.19878	1.4267
1	1182965	1183198	vir1_vs_VIRc	2.47633	-	17.948	2.72995	1.78542
1	1183302	1183428	vir1_vs_VIRc	2.26602	-	23.8688	1.8407	1.18332
1	1183530	1183683	vir1_vs_VIRc	1.97416	-	18.329	2.1355	1.38361
1	1186698	1186826	vir1_vs_VIRc	1.77361	+	9.89729	2.35331	1.45151
1	1190465	1190601	vir1_vs_VIRc	1.84116	+	26.0511	1.64348	1.0166
1	1195089	1195242	vir1_vs_VIRc	1.99711	+	16.1889	3.70482	2.25595
1	1202242	1202392	vir1_vs_VIRc	1.12063	+	64.1838	1.79945	1.11563
1	1202461	1202637	vir1_vs_VIRc	1.34295	+	48.2966	2.12731	1.31432
1	1207526	1207912	vir1_vs_VIRc	3.08462	+	7.63523	2.8186	1.71811
1	1227247	1227309	vir1_vs_VIRc	1.19983	+	114.933	1.70128	1.05328
1	1227580	1227666	vir1_vs_VIRc	1.29979	+	112.782	1.80014	1.11593
1	1237695	1237901	vir1_vs_VIRc	3.0506	-	11.663	3.48609	2.29827
1	1237983	1238121	vir1_vs_VIRc	2.61271	-	5.27338	2.42346	1.58305
1	1238161	1238299	vir1_vs_VIRc	1.87338	-	7.3789	1.61221	1.02624
1	1284356	1284453	vir1_vs_VIRc	1.40432	-	44.2594	1.70849	1.09303
1	1284628	1284690	vir1_vs_VIRc	1.73408	-	40.1534	1.77923	1.14093
1	1286420	1286500	vir1_vs_VIRc	1.52915	-	17.0679	1.62518	1.03483
1	1297100	1297383	vir1_vs_VIRc	2.31106	-	7.64906	4.49881	2.9983
1	1298122	1298194	vir1_vs_VIRc	1.97667	-	6.14726	2.06627	1.33474
1	1316651	1316688	vir1_vs_VIRc	5.02587	+	2.79825	1.66286	1.02847
1	1316963	1317095	vir1_vs_VIRc	6.93362	+	3.16604	1.64978	1.02015
1	1318299	1318440	vir1_vs_VIRc	2.50156	+	4.95423	1.63139	1.00925
1	1319055	1319187	vir1_vs_VIRc	2.97623	+	4.12343	1.75879	1.08928
1	1342134	1343664	vir1_vs_VIRc	1.33434	-	119.634	6.06701	3.9243
1	1346389	1346663	vir1_vs_VIRc	1.14858	+	79.3573	2.62545	1.6074
1	1348714	1348884	vir1_vs_VIRc	2.2337	+	11.0288	2.26376	1.40005
1	1350203	1350449	vir1_vs_VIRc	2.18465	+	91.7905	3.33618	2.03229
1	1350833	1350902	vir1_vs_VIRc	2.01688	+	70.8393	2.26612	1.40127
1	1351107	1351212	vir1_vs_VIRc	1.46881	+	62.1533	2.63563	1.6121
1	1351526	1351634	vir1_vs_VIRc	1.67369	+	94.0765	2.27657	1.40747
1	1351713	1351881	vir1_vs_VIRc	2.05704	+	87.3146	2.5642	1.5695
1	1352071	1352561	vir1_vs_VIRc	1.40577	+	84.0328	3.70482	2.25595
1	1352632	1352773	vir1_vs_VIRc	1.39473	+	124.217	2.19141	1.35501
1	1352876	1353124	vir1_vs_VIRc	1.86255	+	111.029	3.28382	1.99344
1	1353224	1353444	vir1_vs_VIRc	1.33334	+	98.7922	3.49237	2.11799
1	1353540	1353799	vir1_vs_VIRc	1.24787	+	141.91	4.61494	2.79579
1	1357220	1357412	vir1_vs_VIRc	1.95734	+	12.0674	1.75449	1.08664
1	1358195	1358367	vir1_vs_VIRc	1.03679	-	542.599	2.37179	1.54605
1	1363320	1363402	vir1_vs_VIRc	1.75798	-	5.69779	1.65082	1.0524
1	1364237	1364401	vir1_vs_VIRc	3.24513	-	4.3197	2.01359	1.29867
1	1364417	1364529	vir1_vs_VIRc	3.42041	-	3.4705	1.57449	1.0013
1	1371681	1372017	vir1_vs_VIRc	1.41913	-	56.3882	2.78666	1.82192
1	1372136	1372296	vir1_vs_VIRc	1.40805	-	65.7169	1.74872	1.12061
1	1372828	1373080	vir1_vs_VIRc	1.36161	-	50.0244	2.77101	1.81438
1	1391788	1391950	vir1_vs_VIRc	1.67075	-	9.53119	2.49287	1.62588
1	1392056	1392165	vir1_vs_VIRc	1.9366	-	5.63636	2.06532	1.33411
1	1392314	1392481	vir1_vs_VIRc	1.86367	-	6.50794	2.12051	1.37252
1	1394231	1394547	vir1_vs_VIRc	2.85069	-	4.52129	2.65489	1.73273
1	1394651	1394871	vir1_vs_VIRc	3.29508	-	4.07014	2.58257	1.68712
1	1398680	1398862	vir1_vs_VIRc	1.3039	-	17.0446	2.90714	1.89866
1	1406541	1406642	vir1_vs_VIRc	1.3961	-	70.3766	2.22961	1.4488
1	1406872	1406959	vir1_vs_VIRc	1.67949	-	73.2566	2.69947	1.76307
1	1407059	1407471	vir1_vs_VIRc	1.92482	-	34.614	5.22191	3.55501
1	1411196	1411445	vir1_vs_VIRc	1.14466	+	124.671	2.76474	1.68374
1	1414429	1414562	vir1_vs_VIRc	1.26852	-	50.6007	1.66439	1.06144
1	1414646	1414822	vir1_vs_VIRc	1.16556	-	49.5993	2.61202	1.7017
1	1415309	1415375	vir1_vs_VIRc	1.12212	-	32.0037	1.83654	1.18044
1	1415450	1415537	vir1_vs_VIRc	1.36556	-	26.233	1.725	1.10482
1	1415742	1415833	vir1_vs_VIRc	1.12047	-	33.2944	1.75199	1.12278
1	1415986	1416093	vir1_vs_VIRc	1.3186	-	39.5069	1.70425	1.08984
1	1420521	1420669	vir1_vs_VIRc	1.34632	-	18.8266	1.89978	1.2241
1	1420687	1420800	vir1_vs_VIRc	2.95314	-	5.35015	1.76722	1.13258
1	1421575	1421702	vir1_vs_VIRc	2.22929	-	7.06315	1.77932	1.14093
1	1427021	1427202	vir1_vs_VIRc	3.7587	+	5.30449	2.58697	1.58348
1	1439906	1440010	vir1_vs_VIRc	1.38357	-	40.3135	1.67993	1.07315
1	1440514	1440659	vir1_vs_VIRc	1.36858	-	33.0696	2.05363	1.32619
1	1441217	1441399	vir1_vs_VIRc	1.2425	-	47.0209	2.35546	1.53673
1	1441426	1441517	vir1_vs_VIRc	3.43108	-	3.04257	1.61057	1.02521
1	1442132	1442224	vir1_vs_VIRc	inf	-	2.36559	2.00665	1.29458
1	1442856	1442990	vir1_vs_VIRc	2.55444	-	4.42593	1.61402	1.02766
1	1444029	1444248	vir1_vs_VIRc	3.87945	-	4.92955	2.51059	1.63915
1	1444455	1444553	vir1_vs_VIRc	2.66583	-	3.77189	1.58696	1.00968
1	1444674	1444987	vir1_vs_VIRc	3.29606	-	4.94586	2.52208	1.64653
1	1445819	1445934	vir1_vs_VIRc	1.63602	-	7.89152	1.69067	1.08047
1	1448754	1448896	vir1_vs_VIRc	-1.05618	-	22.9808	1.92278	1.23908
1	1457703	1457894	vir1_vs_VIRc	2.20228	-	11.5786	2.20375	1.43018
1	1463129	1463529	vir1_vs_VIRc	1.3965	+	45.5549	3.06444	1.85757
1	1463649	1464087	vir1_vs_VIRc	1.23785	+	81.3404	2.93409	1.77715
1	1464173	1464938	vir1_vs_VIRc	1.02863	+	96.194	4.03715	2.44892
1	1465295	1465390	vir1_vs_VIRc	1.38255	+	12.303	1.74824	1.08235
1	1470517	1470684	vir1_vs_VIRc	-1.2658	+	10.8438	1.74359	1.07915
1	1485803	1485943	vir1_vs_VIRc	1.0685	-	73.6294	2.04586	1.32097
1	1486040	1486215	vir1_vs_VIRc	1.12772	-	80.2888	2.56173	1.67254
1	1486373	1486740	vir1_vs_VIRc	1.29526	-	75.7511	3.78146	2.50511
1	1488390	1488479	vir1_vs_VIRc	1.23849	-	61.112	1.69822	1.08537
1	1489099	1489386	vir1_vs_VIRc	1.30652	-	41.1053	3.22879	2.12102
1	1489590	1489953	vir1_vs_VIRc	1.70785	-	40.5604	4.11762	2.74763
1	1490730	1490913	vir1_vs_VIRc	2.04218	-	28.0716	3.12105	2.04428
1	1492136	1492261	vir1_vs_VIRc	1.57161	-	85.0721	3.20073	2.10277
1	1492336	1492423	vir1_vs_VIRc	1.19863	-	82.3835	1.9015	1.22515
1	1492528	1492648	vir1_vs_VIRc	1.23835	-	65.3974	2.83784	1.85216
1	1492732	1492805	vir1_vs_VIRc	1.41565	-	82.6329	2.20256	1.42925
1	1492889	1492952	vir1_vs_VIRc	1.18079	-	86.6055	1.68458	1.07638
1	1493029	1493240	vir1_vs_VIRc	1.56467	-	62.2453	4.4138	2.94218
1	1493328	1493401	vir1_vs_VIRc	1.77633	-	57.4572	2.58286	1.68729
1	1493495	1493591	vir1_vs_VIRc	1.44686	-	66.2861	1.61179	1.02608
1	1493822	1494163	vir1_vs_VIRc	1.27037	-	49.2961	3.19022	2.09717
1	1505000	1505153	vir1_vs_VIRc	2.02732	+	30.1705	2.69723	1.64576
1	1505340	1505462	vir1_vs_VIRc	8.58918	+	4.18564	2.25035	1.39375
1	1505561	1505993	vir1_vs_VIRc	2.00441	+	66.3851	4.17732	2.50865
1	1506117	1507450	vir1_vs_VIRc	1.64157	+	78.7348	5.97666	3.84278
1	1507522	1507630	vir1_vs_VIRc	1.40838	+	67.4778	1.73814	1.07584
1	1507675	1507807	vir1_vs_VIRc	1.0442	+	115.025	2.0361	1.26042
1	1507816	1507945	vir1_vs_VIRc	1.53266	+	37.8064	2.21768	1.37202
1	1511491	1511631	vir1_vs_VIRc	-1.38278	+	13.1046	1.79274	1.11101
1	1514557	1514685	vir1_vs_VIRc	1.01657	-	52.1505	1.75418	1.12437
1	1516849	1517042	vir1_vs_VIRc	1.28432	-	62.0193	2.26063	1.46984
1	1518634	1518757	vir1_vs_VIRc	1.87044	-	13.6815	2.68807	1.75723
1	1529783	1530040	vir1_vs_VIRc	1.99538	+	89.4767	3.53419	2.14403
1	1530148	1530336	vir1_vs_VIRc	1.42876	+	95.9537	2.48488	1.52074
1	1530430	1530592	vir1_vs_VIRc	1.31797	+	100.699	2.18673	1.35193
1	1530856	1531120	vir1_vs_VIRc	1.06161	+	116.38	2.3249	1.43716
1	1554799	1554900	vir1_vs_VIRc	1.3743	+	60.085	2.0369	1.26093
1	1554991	1555341	vir1_vs_VIRc	1.3711	+	55.6769	3.1448	1.90153
1	1555932	1556156	vir1_vs_VIRc	1.11684	+	92.5756	2.59809	1.59039
1	1563922	1564063	vir1_vs_VIRc	1.06835	-	52.9677	1.59491	1.01572
1	1565152	1565363	vir1_vs_VIRc	1.0338	+	60.875	2.28285	1.41099
1	1576875	1577148	vir1_vs_VIRc	2.01951	+	45.8345	3.69563	2.25512
1	1577222	1579195	vir1_vs_VIRc	1.73357	+	69.8316	5.97666	3.84278
1	1578178	1578285	vir1_vs_VIRc	3.42677	-	3.02006	1.77416	1.13739
1	1579314	1579440	vir1_vs_VIRc	1.40557	+	83.269	2.83899	1.72961
1	1580030	1580268	vir1_vs_VIRc	1.2627	+	92.4358	2.43247	1.49451
1	1581184	1581283	vir1_vs_VIRc	1.2115	+	104.685	1.63807	1.01355
1	1590017	1590238	vir1_vs_VIRc	2.27954	+	13.86	2.19198	1.35512
1	1602769	1602981	vir1_vs_VIRc	1.57402	-	22.9863	2.33712	1.52447
1	1603108	1603457	vir1_vs_VIRc	1.65393	-	19.5733	3.03722	1.98733
1	1603623	1603757	vir1_vs_VIRc	1.28898	-	31.5914	1.96537	1.2675
1	1603876	1604054	vir1_vs_VIRc	1.82078	-	19.4055	2.40473	1.56858
1	1604388	1604583	vir1_vs_VIRc	1.7048	-	21.406	2.67661	1.74804
1	1611393	1611543	vir1_vs_VIRc	1.61547	-	30.7837	2.12864	1.37843
1	1624950	1625202	vir1_vs_VIRc	1.17172	+	76.8738	2.13387	1.3185
1	1631579	1631842	vir1_vs_VIRc	1.05181	-	128.771	2.59353	1.69057
1	1631916	1632077	vir1_vs_VIRc	1.11934	-	140.463	2.48031	1.61748
1	1632972	1633053	vir1_vs_VIRc	1.1099	-	84.3628	2.00364	1.29265
1	1633132	1633268	vir1_vs_VIRc	2.1461	+	10.1661	2.09889	1.29719
1	1633132	1633306	vir1_vs_VIRc	1.48198	-	97.1938	4.02169	2.67844
1	1633400	1633475	vir1_vs_VIRc	1.43541	-	83.8651	2.47229	1.61212
1	1633619	1633761	vir1_vs_VIRc	1.41219	-	90.8631	2.7593	1.80515
1	1633934	1634095	vir1_vs_VIRc	1.61889	-	90.4815	3.36372	2.21011
1	1634604	1634777	vir1_vs_VIRc	1.85927	-	85.046	3.38668	2.22843
1	1634918	1635821	vir1_vs_VIRc	1.45733	-	78.6221	5.36804	3.55501
1	1639280	1639401	vir1_vs_VIRc	2.53154	+	12.0628	1.96336	1.21789
1	1639587	1640120	vir1_vs_VIRc	1.8403	+	24.2882	3.84633	2.34465
1	1640245	1640474	vir1_vs_VIRc	1.55681	+	21.337	2.52319	1.54518
1	1645374	1647149	vir1_vs_VIRc	2.53164	-	490.358	6.06701	3.9243
1	1645585	1646247	vir1_vs_VIRc	1.23049	+	83.8942	5.13157	3.2025
1	1648626	1648779	vir1_vs_VIRc	1.34752	-	79.5168	3.00669	1.96463
1	1648860	1649426	vir1_vs_VIRc	1.30705	-	71.9652	4.89092	3.31248
1	1649531	1649760	vir1_vs_VIRc	1.54405	-	58.9616	2.61232	1.70189
1	1649850	1649962	vir1_vs_VIRc	1.58212	-	26.9602	1.69789	1.0851
1	1650216	1650334	vir1_vs_VIRc	1.66201	-	58.2836	2.84041	1.8535
1	1650457	1650576	vir1_vs_VIRc	2.41112	-	57.0014	3.55246	2.34625
1	1650728	1650887	vir1_vs_VIRc	2.71578	-	52.9589	5.22191	3.55501
1	1650982	1651171	vir1_vs_VIRc	2.10739	-	57.3219	3.95642	2.62842
1	1651256	1651324	vir1_vs_VIRc	1.93885	-	64.8563	3.85482	2.56055
1	1651437	1651562	vir1_vs_VIRc	1.87768	-	49.7011	2.89237	1.88873
1	1651648	1651757	vir1_vs_VIRc	1.57565	-	36.2364	1.71962	1.10078
1	1651833	1651984	vir1_vs_VIRc	2.13829	-	37.0735	2.78666	1.82192
1	1652114	1652243	vir1_vs_VIRc	1.97911	-	57.4756	2.54942	1.66438
1	1652327	1652424	vir1_vs_VIRc	1.78109	-	108.065	2.44844	1.59696
1	1652514	1652637	vir1_vs_VIRc	1.91051	-	54.4711	2.28706	1.48964
1	1652719	1652879	vir1_vs_VIRc	1.87572	-	42.2148	3.4793	2.2958
1	1652967	1653052	vir1_vs_VIRc	1.77586	-	43.9612	1.59883	1.01798
1	1653822	1653917	vir1_vs_VIRc	2.07336	-	43.2066	2.80008	1.82939
1	1654019	1654156	vir1_vs_VIRc	2.69508	-	44.756	3.32116	2.18773
1	1654282	1654368	vir1_vs_VIRc	2.3844	-	32.8046	2.59207	1.69026
1	1654451	1654500	vir1_vs_VIRc	2.93173	-	36.6067	2.52208	1.64653
1	1654588	1654669	vir1_vs_VIRc	2.68712	-	39.689	4.13759	2.74993
1	1654832	1654892	vir1_vs_VIRc	2.43474	-	38.8689	2.84093	1.8536
1	1654976	1655028	vir1_vs_VIRc	2.09913	-	40.0409	1.63689	1.04297
1	1655120	1655457	vir1_vs_VIRc	2.45341	-	33.5321	4.19195	2.79066
1	1655631	1655748	vir1_vs_VIRc	3.35431	-	43.9407	3.3165	2.18518
1	1655830	1655949	vir1_vs_VIRc	2.99707	-	40.7139	2.92997	1.91585
1	1656201	1656294	vir1_vs_VIRc	2.37753	-	47.6161	1.72398	1.10402
1	1656391	1656467	vir1_vs_VIRc	2.04264	-	37.8236	1.72584	1.10525
1	1656555	1656692	vir1_vs_VIRc	2.70991	-	31.6697	4.13759	2.74993
1	1656795	1656921	vir1_vs_VIRc	3.36743	-	29.5564	3.61523	2.39145
1	1657067	1657158	vir1_vs_VIRc	2.85204	-	29.7536	2.32863	1.51944
1	1657263	1657355	vir1_vs_VIRc	2.61917	-	25.9642	3.06571	2.00623
1	1657440	1657556	vir1_vs_VIRc	3.12707	-	23.3775	4.00631	2.66892
1	1657641	1657751	vir1_vs_VIRc	3.14654	-	30.8829	4.18052	2.78101
1	1657888	1657981	vir1_vs_VIRc	2.56994	-	32.961	4.74479	3.19022
1	1658084	1658205	vir1_vs_VIRc	3.12514	-	32.8613	5.02562	3.4052
1	1658299	1658399	vir1_vs_VIRc	3.33596	-	24.3655	3.71483	2.45647
1	1658491	1658699	vir1_vs_VIRc	3.19279	-	22.3907	5.22191	3.55501
1	1659256	1659423	vir1_vs_VIRc	2.63231	-	21.5184	2.52731	1.64965
1	1669851	1670047	vir1_vs_VIRc	1.30662	+	45.9298	2.72649	1.65954
1	1670200	1670470	vir1_vs_VIRc	1.2309	+	37.33	2.17684	1.34584
1	1672116	1672381	vir1_vs_VIRc	1.20702	+	44.6745	2.67498	1.63413
1	1672458	1672733	vir1_vs_VIRc	1.06461	+	53.8276	2.46625	1.51118
1	1679601	1679716	vir1_vs_VIRc	1.40166	+	54.2881	2.6986	1.64698
1	1682282	1682428	vir1_vs_VIRc	2.04595	+	11.7942	1.63616	1.01258
1	1683757	1683949	vir1_vs_VIRc	1.81656	+	25.7988	2.225	1.37733
1	1689127	1689235	vir1_vs_VIRc	2.48847	-	5.89908	1.74094	1.11585
1	1699869	1700215	vir1_vs_VIRc	2.31681	-	11.1945	4.10797	2.74763
1	1700444	1700619	vir1_vs_VIRc	2.3013	-	7.43655	2.53464	1.65559
1	1700622	1700817	vir1_vs_VIRc	2.08801	-	6.53104	2.35953	1.53894
1	1701432	1701601	vir1_vs_VIRc	3.64424	-	4.94461	1.87531	1.20677
1	1702504	1702663	vir1_vs_VIRc	2.7464	-	4.40937	1.84354	1.18487
1	1703088	1703943	vir1_vs_VIRc	2.39265	-	218.983	6.06701	3.9243
1	1703167	1703319	vir1_vs_VIRc	inf	+	3.65196	2.28145	1.41015
1	1703995	1704681	vir1_vs_VIRc	2.92435	-	222.497	6.06701	3.9243
1	1707887	1708027	vir1_vs_VIRc	1.235	+	32.7175	1.86935	1.16032
1	1714944	1715099	vir1_vs_VIRc	1.77265	+	13.1725	1.81109	1.12218
1	1715112	1715303	vir1_vs_VIRc	1.26367	+	24.826	2.13362	1.3185
1	1715855	1715998	vir1_vs_VIRc	1.78241	+	6.10243	1.66718	1.03149
1	1721992	1722148	vir1_vs_VIRc	2.14405	+	12.3705	2.48404	1.5204
1	1728159	1728396	vir1_vs_VIRc	-1.03908	+	35.1338	2.33608	1.4429
1	1732886	1733299	vir1_vs_VIRc	1.24846	+	64.1771	3.48671	2.11555
1	1733778	1733997	vir1_vs_VIRc	1.45691	+	65.758	2.47111	1.51257
1	1734108	1734214	vir1_vs_VIRc	1.53328	+	55.5989	2.15851	1.33425
1	1734866	1734991	vir1_vs_VIRc	1.35809	+	34.6164	2.00257	1.24133
1	1744745	1745104	vir1_vs_VIRc	-1.66513	-	17.5296	4.11762	2.74763
1	1745129	1745289	vir1_vs_VIRc	-1.09396	-	14.177	2.23088	1.44964
1	1749110	1749233	vir1_vs_VIRc	2.15574	-	5.66129	1.78496	1.14457
1	1749642	1749692	vir1_vs_VIRc	5.40439	+	3.61275	2.77664	1.6925
1	1754250	1755077	vir1_vs_VIRc	1.561	+	64.0809	5.49954	3.44049
1	1755408	1755482	vir1_vs_VIRc	1.53846	+	50.3811	1.95684	1.21432
1	1755633	1756194	vir1_vs_VIRc	1.88611	+	48.179	4.4853	2.69904
1	1756311	1756415	vir1_vs_VIRc	1.85765	+	58.5984	2.68242	1.63754
1	1756562	1756767	vir1_vs_VIRc	1.39417	+	62.8256	2.46278	1.50997
1	1756865	1756957	vir1_vs_VIRc	1.58487	+	78.4444	2.26765	1.40214
1	1757047	1757144	vir1_vs_VIRc	1.88122	+	60.8265	1.81109	1.12218
1	1757227	1757388	vir1_vs_VIRc	1.90807	+	63.8534	3.34624	2.0371
1	1757734	1757877	vir1_vs_VIRc	1.52767	+	75.2101	2.41832	1.48867
1	1758924	1759013	vir1_vs_VIRc	1.32872	+	68.5972	2.58732	1.58348
1	1759115	1759310	vir1_vs_VIRc	1.26565	+	91.1331	2.87184	1.74532
1	1772885	1772995	vir1_vs_VIRc	2.06344	+	5.81757	1.6481	1.01966
1	1779349	1779572	vir1_vs_VIRc	1.14955	+	115.368	2.21677	1.3714
1	1779574	1779786	vir1_vs_VIRc	1.04594	+	172.564	2.32297	1.43635
1	1780174	1780298	vir1_vs_VIRc	1.03215	+	183.479	1.89255	1.17493
1	1780720	1780810	vir1_vs_VIRc	1.04221	+	331.979	1.85903	1.15285
1	1781087	1781296	vir1_vs_VIRc	1.05775	+	154.65	2.52197	1.5447
1	1784798	1785071	vir1_vs_VIRc	2.97628	+	6.5955	2.4415	1.49926
1	1785152	1785757	vir1_vs_VIRc	2.685	+	8.7929	3.47016	2.1082
1	1785769	1785871	vir1_vs_VIRc	2.51776	+	8.96926	1.77317	1.09847
1	1790820	1791023	vir1_vs_VIRc	1.33446	+	34.5535	2.39177	1.47357
1	1791310	1791411	vir1_vs_VIRc	1.03866	+	32.5221	1.63672	1.013
1	1791820	1792282	vir1_vs_VIRc	1.52004	+	51.3783	3.38449	2.06016
1	1792331	1793134	vir1_vs_VIRc	1.75057	+	38.7734	4.80057	2.94093
1	1793210	1793341	vir1_vs_VIRc	1.19893	+	40.5095	1.86322	1.15573
1	1793482	1793611	vir1_vs_VIRc	1.54273	+	36.1494	1.72074	1.06524
1	1803323	1803546	vir1_vs_VIRc	1.05211	-	123.076	2.29638	1.49582
1	1806233	1806343	vir1_vs_VIRc	1.92234	-	10.8251	1.5996	1.01826
1	1807148	1807198	vir1_vs_VIRc	2.18147	-	12.8905	1.67907	1.07247
1	1807307	1807580	vir1_vs_VIRc	3.05927	-	8.71655	3.79055	2.51153
1	1808048	1808323	vir1_vs_VIRc	1.03437	-	81.587	3.16884	2.08203
1	1808743	1808936	vir1_vs_VIRc	1.1589	-	170.588	2.88717	1.88539
1	1809019	1809153	vir1_vs_VIRc	1.53759	-	174.931	4.02169	2.67844
1	1809222	1809362	vir1_vs_VIRc	1.72789	-	169.145	4.10797	2.74763
1	1809506	1809700	vir1_vs_VIRc	1.51361	-	131.174	4.83656	3.27435
1	1809813	1809940	vir1_vs_VIRc	1.82501	-	103.672	4.24094	2.82228
1	1810506	1810581	vir1_vs_VIRc	2.04694	-	95.8081	2.5912	1.69006
1	1810872	1811021	vir1_vs_VIRc	1.97816	-	98.8444	4.02169	2.67844
1	1811163	1811516	vir1_vs_VIRc	1.91066	-	93.9482	5.02562	3.4052
1	1811608	1811757	vir1_vs_VIRc	2.30228	-	108.866	4.89092	3.31248
1	1812450	1812740	vir1_vs_VIRc	2.19776	-	83.0627	5.22191	3.55501
1	1812833	1813029	vir1_vs_VIRc	2.25064	-	86.0406	5.22191	3.55501
1	1813134	1813288	vir1_vs_VIRc	2.27422	-	106.334	4.49881	2.9983
1	1813386	1813433	vir1_vs_VIRc	2.11156	-	99.8073	2.39353	1.56029
1	1813927	1814055	vir1_vs_VIRc	2.65605	-	84.7209	4.2541	2.82228
1	1814144	1814258	vir1_vs_VIRc	2.63341	-	63.9775	3.79055	2.51153
1	1814447	1814562	vir1_vs_VIRc	2.60935	-	67.931	4.19195	2.79066
1	1814659	1814733	vir1_vs_VIRc	2.38196	-	82.5289	3.33866	2.19441
1	1814926	1815085	vir1_vs_VIRc	2.3568	-	111.997	4.63565	3.10082
1	1815174	1815242	vir1_vs_VIRc	2.60545	-	57.6534	2.91626	1.90601
1	1815392	1815483	vir1_vs_VIRc	3.05958	-	27.1322	2.62595	1.71184
1	1815943	1816408	vir1_vs_VIRc	-1.15436	-	43.8859	4.00631	2.66892
1	1820927	1821864	vir1_vs_VIRc	1.2005	-	87.5036	5.36804	3.55501
1	1828727	1828884	vir1_vs_VIRc	1.61698	+	58.6609	2.49365	1.52534
1	1831714	1831840	vir1_vs_VIRc	3.49338	-	4.05512	1.87975	1.20983
1	1835950	1836029	vir1_vs_VIRc	1.33145	-	68.0708	2.46354	1.60683
1	1836114	1836246	vir1_vs_VIRc	1.19782	-	79.1472	2.45264	1.60026
1	1836969	1837144	vir1_vs_VIRc	1.20849	-	74.2708	3.37241	2.21699
1	1837447	1837616	vir1_vs_VIRc	1.57929	-	32.1931	2.56527	1.67455
1	1859979	1860165	vir1_vs_VIRc	1.04948	-	133.565	3.03722	1.98733
1	1860587	1860699	vir1_vs_VIRc	1.47854	-	55.2139	2.36432	1.54121
1	1871100	1871420	vir1_vs_VIRc	1.38996	-	62.5428	3.60913	2.38934
1	1871436	1871575	vir1_vs_VIRc	1.12098	-	84.6238	1.89754	1.22232
1	1871667	1871786	vir1_vs_VIRc	1.28403	-	121.522	2.71271	1.77302
1	1871914	1871973	vir1_vs_VIRc	1.14573	-	112.882	1.8034	1.157
1	1872350	1872431	vir1_vs_VIRc	1.40269	-	64.1728	1.91863	1.23683
1	1872745	1872888	vir1_vs_VIRc	1.43807	-	65.3964	2.53745	1.65787
1	1873100	1873640	vir1_vs_VIRc	1.68756	-	66.9005	5.22191	3.55501
1	1893073	1893174	vir1_vs_VIRc	1.69192	+	17.9812	1.70485	1.05569
1	1899984	1900107	vir1_vs_VIRc	1.76466	+	59.5585	2.13374	1.3185
1	1900512	1901264	vir1_vs_VIRc	1.51367	+	104.581	4.65445	2.83439
1	1901524	1902201	vir1_vs_VIRc	1.21454	+	114.094	4.00818	2.43983
1	1907089	1908196	vir1_vs_VIRc	1.22412	+	100.768	4.4853	2.69904
1	1913140	1913304	vir1_vs_VIRc	2.61223	+	6.05808	2.37908	1.46697
1	1913449	1913638	vir1_vs_VIRc	2.08405	+	11.2154	1.96836	1.22068
1	1914242	1914499	vir1_vs_VIRc	1.79898	+	18.9926	2.64322	1.61608
1	1919130	1919270	vir1_vs_VIRc	1.13391	-	24.4385	1.96986	1.27087
1	1919619	1919752	vir1_vs_VIRc	1.48456	-	21.3986	1.79738	1.15261
1	1922369	1922892	vir1_vs_VIRc	1.28714	+	136.603	3.91597	2.38968
1	1923141	1923258	vir1_vs_VIRc	1.23354	+	157.956	2.40321	1.4799
1	1923353	1923460	vir1_vs_VIRc	1.08734	+	201.459	2.47002	1.51211
1	1923570	1923742	vir1_vs_VIRc	1.1755	+	159.818	2.70089	1.6482
1	1923822	1923921	vir1_vs_VIRc	1.01261	+	161.095	1.77721	1.10066
1	1935568	1935708	vir1_vs_VIRc	1.66188	-	37.6927	2.2609	1.47002
1	1935799	1935905	vir1_vs_VIRc	2.13582	-	32.9743	2.41274	1.57515
1	1936004	1936144	vir1_vs_VIRc	1.7491	-	22.7973	1.99048	1.28453
1	1936228	1936368	vir1_vs_VIRc	2.02	-	20.2831	2.92871	1.91517
1	1936475	1936673	vir1_vs_VIRc	1.75013	-	20.9313	2.38677	1.55619
1	1939372	1939463	vir1_vs_VIRc	-1.15499	-	22.0996	2.63292	1.71707
1	1944650	1944736	vir1_vs_VIRc	1.59001	-	16.7989	1.82604	1.17261
1	1955356	1955924	vir1_vs_VIRc	1.11861	+	236.069	3.38895	2.06166
1	1956346	1956481	vir1_vs_VIRc	2.58086	-	5.77206	1.62849	1.03727
1	1956507	1956695	vir1_vs_VIRc	1.93751	-	8.94312	2.36674	1.54288
1	1957526	1957628	vir1_vs_VIRc	2.38681	-	7.99919	1.67321	1.06831
1	1961421	1961529	vir1_vs_VIRc	1.87211	+	12.2752	1.66034	1.02729
1	1961730	1961809	vir1_vs_VIRc	4.00774	+	3.71979	1.81984	1.12812
1	1962074	1962233	vir1_vs_VIRc	3.56435	+	5.61302	2.40788	1.48261
1	1962241	1962352	vir1_vs_VIRc	inf	+	2.68601	1.63257	1.01005
1	1965857	1966098	vir1_vs_VIRc	1.40372	+	28.2452	2.22239	1.37539
1	1969310	1969517	vir1_vs_VIRc	1.49937	-	428.401	4.63565	3.10082
1	1969739	1969883	vir1_vs_VIRc	1.79507	+	38.4397	3.02972	1.8371
1	1970424	1970623	vir1_vs_VIRc	1.34785	+	57.52	2.27106	1.40435
1	1970676	1970847	vir1_vs_VIRc	1.16501	+	57.3537	2.08362	1.2881
1	1985689	1985836	vir1_vs_VIRc	3.79066	+	3.21678	1.62826	1.00735
1	1987105	1987327	vir1_vs_VIRc	2.08606	+	6.62593	2.63563	1.6121
1	1987445	1987564	vir1_vs_VIRc	2.34814	+	5.5375	1.67289	1.03519
1	2007038	2007176	vir1_vs_VIRc	1.31044	-	70.8261	2.565	1.6745
1	2007678	2007832	vir1_vs_VIRc	1.59874	+	22.0543	2.01038	1.24527
1	2019836	2019945	vir1_vs_VIRc	1.23589	-	29.0841	1.67486	1.06985
1	2020863	2020997	vir1_vs_VIRc	1.76116	-	20.6994	2.98964	1.9542
1	2021777	2021901	vir1_vs_VIRc	1.84605	-	15.4213	2.03122	1.31093
1	2023140	2023284	vir1_vs_VIRc	2.15222	-	20.6977	1.93382	1.24561
1	2029962	2030865	vir1_vs_VIRc	1.27732	+	63.7561	4.3856	2.65457
1	2031292	2032898	vir1_vs_VIRc	1.25193	+	192.477	5.97666	3.84278
1	2031338	2031465	vir1_vs_VIRc	3.44294	-	3.58724	2.04603	1.32099
1	2033330	2033391	vir1_vs_VIRc	3.75429	-	10.4812	1.92773	1.24219
1	2033521	2033619	vir1_vs_VIRc	3.89536	-	9.62458	2.0229	1.30447
1	2035574	2035749	vir1_vs_VIRc	-1.1523	+	23.8054	2.24259	1.3895
1	2040456	2040669	vir1_vs_VIRc	1.91507	+	29.8766	2.27536	1.40747
1	2040881	2040971	vir1_vs_VIRc	2.39532	+	33.8388	2.1504	1.3298
1	2041075	2041232	vir1_vs_VIRc	1.81598	+	40.4504	2.33968	1.44502
1	2041244	2041507	vir1_vs_VIRc	2.13594	+	36.5745	3.34018	2.03381
1	2042220	2042313	vir1_vs_VIRc	1.63769	+	32.117	1.80054	1.11608
1	2042424	2042482	vir1_vs_VIRc	2.39986	+	30.1907	2.35998	1.45644
1	2042581	2042706	vir1_vs_VIRc	1.82626	+	36.9616	2.62661	1.6074
1	2042962	2043014	vir1_vs_VIRc	1.7731	+	42.1226	1.81924	1.12778
1	2043590	2043803	vir1_vs_VIRc	1.84753	+	33.2161	2.56387	1.56943
1	2043805	2044576	vir1_vs_VIRc	1.85269	+	41.7604	4.74622	2.90398
1	2044706	2045787	vir1_vs_VIRc	1.50479	+	63.6643	5.27769	3.23399
1	2045911	2046393	vir1_vs_VIRc	1.0973	+	80.8335	3.55015	2.1483
1	2047035	2047181	vir1_vs_VIRc	2.25875	-	5.98583	2.42445	1.58364
1	2047904	2048083	vir1_vs_VIRc	2.41408	-	34.9046	2.8358	1.85079
1	2048355	2048529	vir1_vs_VIRc	1.43806	-	28.719	2.42405	1.58354
1	2048991	2049264	vir1_vs_VIRc	1.32251	-	104.35	3.70718	2.4554
1	2054672	2054788	vir1_vs_VIRc	2.86424	-	5.00783	2.04314	1.31937
1	2054886	2055122	vir1_vs_VIRc	2.48818	-	6.85478	3.18563	2.09328
1	2058061	2058155	vir1_vs_VIRc	1.84582	-	14.1061	1.98261	1.27987
1	2058379	2058692	vir1_vs_VIRc	1.61316	-	11.4785	2.95946	1.93608
1	2058716	2058908	vir1_vs_VIRc	1.67929	-	9.82988	1.94944	1.25612
1	2059064	2059393	vir1_vs_VIRc	2.22051	-	9.5601	2.97817	1.94653
1	2059495	2059714	vir1_vs_VIRc	2.55242	-	10.5905	4.10797	2.74763
1	2059806	2060281	vir1_vs_VIRc	2.72564	-	9.66211	5.22191	3.55501
1	2061597	2061737	vir1_vs_VIRc	1.02564	-	76.1028	2.29447	1.49489
1	2062707	2062790	vir1_vs_VIRc	1.16338	-	53.8363	1.59591	1.01645
1	2063484	2063650	vir1_vs_VIRc	1.28282	-	47.7949	2.35478	1.53652
1	2064119	2064299	vir1_vs_VIRc	1.40574	-	46.3821	2.49217	1.62563
1	2064636	2064925	vir1_vs_VIRc	1.51593	-	43.8879	3.48837	2.29968
1	2065132	2065372	vir1_vs_VIRc	1.41918	-	46.2849	2.78303	1.82082
1	2065833	2066043	vir1_vs_VIRc	2.03702	-	30.9463	2.81005	1.8346
1	2066132	2066322	vir1_vs_VIRc	2.31536	-	40.644	4.10797	2.74763
1	2066496	2066614	vir1_vs_VIRc	1.46624	-	29.6982	1.86005	1.19602
1	2066733	2066823	vir1_vs_VIRc	1.41506	-	27.9368	1.85003	1.18981
1	2066902	2067048	vir1_vs_VIRc	1.95965	-	42.089	2.77809	1.81781
1	2067150	2067325	vir1_vs_VIRc	2.51755	-	32.6241	3.78146	2.50511
1	2071244	2071605	vir1_vs_VIRc	1.85686	+	15.636	2.81981	1.71829
1	2076542	2076696	vir1_vs_VIRc	2.7027	+	9.92473	2.40321	1.4799
1	2083492	2083665	vir1_vs_VIRc	1.61368	+	18.3745	2.1262	1.31401
1	2084825	2085071	vir1_vs_VIRc	1.12361	+	41.0611	2.17739	1.3463
1	2085335	2085499	vir1_vs_VIRc	1.4657	+	47.6879	2.16382	1.33728
1	2090500	2090689	vir1_vs_VIRc	1.07861	-	46.7386	2.22484	1.44504
1	2090831	2091144	vir1_vs_VIRc	1.36273	-	50.13	3.61831	2.39406
1	2095540	2095698	vir1_vs_VIRc	1.10752	-	115.501	2.51642	1.64298
1	2095804	2096331	vir1_vs_VIRc	1.32837	-	90.9618	4.60461	3.09052
1	2100066	2100353	vir1_vs_VIRc	1.69972	-	40.3669	4.24094	2.82228
1	2101853	2101924	vir1_vs_VIRc	1.70992	-	34.3889	1.76522	1.13101
1	2102078	2102149	vir1_vs_VIRc	1.86202	-	39.6725	1.82044	1.16877
1	2102266	2102409	vir1_vs_VIRc	1.7892	-	31.2633	2.19317	1.42343
1	2102808	2102958	vir1_vs_VIRc	2.06958	-	23.989	2.59734	1.69305
1	2103097	2103252	vir1_vs_VIRc	1.77109	-	28.2019	2.19913	1.42674
1	2103304	2103426	vir1_vs_VIRc	4.95012	-	5.18902	2.3438	1.52923
1	2108598	2108807	vir1_vs_VIRc	1.02271	+	57.3937	2.01095	1.24552
1	2113237	2113421	vir1_vs_VIRc	1.14734	-	179.365	2.60747	1.69967
1	2113918	2114041	vir1_vs_VIRc	1.00372	-	171.409	1.8244	1.17184
1	2117522	2117666	vir1_vs_VIRc	1.35097	-	49.0178	1.91955	1.23721
1	2117822	2117978	vir1_vs_VIRc	1.17436	-	63.396	2.11369	1.36758
1	2118485	2118718	vir1_vs_VIRc	1.30128	-	76.5897	2.36123	1.53999
1	2118846	2118965	vir1_vs_VIRc	1.47264	-	71.5312	2.45349	1.60081
1	2120156	2120231	vir1_vs_VIRc	1.06044	-	93.193	1.61706	1.02983
1	2120588	2120737	vir1_vs_VIRc	1.28903	-	57.6944	1.77946	1.14093
1	2121049	2121222	vir1_vs_VIRc	2.05724	-	7.68103	2.14496	1.39053
1	2132479	2132695	vir1_vs_VIRc	1.17672	-	285.149	2.96424	1.93951
1	2132837	2132937	vir1_vs_VIRc	1.08073	-	298.511	2.56418	1.67423
1	2133011	2133138	vir1_vs_VIRc	1.01244	-	246.43	2.18171	1.41667
1	2133568	2133663	vir1_vs_VIRc	1.25926	-	277.924	2.00567	1.29403
1	2133741	2133806	vir1_vs_VIRc	1.20451	-	298.282	1.62492	1.03469
1	2134124	2134190	vir1_vs_VIRc	1.09351	-	306.918	1.96599	1.26798
1	2134320	2134418	vir1_vs_VIRc	1.10862	-	294.777	2.51887	1.64428
1	2134512	2134581	vir1_vs_VIRc	1.22148	-	311.377	2.3155	1.51056
1	2134688	2134812	vir1_vs_VIRc	1.46237	-	297.456	3.22879	2.12102
1	2134896	2134956	vir1_vs_VIRc	1.37568	-	227.358	2.58543	1.68909
1	2135040	2135654	vir1_vs_VIRc	1.41384	-	217.741	5.22191	3.55501
1	2139608	2139712	vir1_vs_VIRc	inf	+	2.15238	1.91389	1.18873
1	2151341	2151705	vir1_vs_VIRc	1.4736	-	35.1007	3.03722	1.98733
1	2151977	2152118	vir1_vs_VIRc	1.75456	-	19.186	2.07877	1.34351
1	2152271	2152408	vir1_vs_VIRc	1.86525	-	12.971	2.09144	1.35186
1	2152866	2153132	vir1_vs_VIRc	1.11433	+	226.679	3.01146	1.82622
1	2153223	2153323	vir1_vs_VIRc	1.1978	+	279.049	1.96564	1.21926
1	2153492	2153605	vir1_vs_VIRc	1.15031	+	297.497	2.29551	1.41824
1	2160319	2160765	vir1_vs_VIRc	1.4898	-	105.335	5.58989	3.72096
1	2163062	2163163	vir1_vs_VIRc	1.18697	-	44.857	1.9307	1.24379
1	2169841	2170001	vir1_vs_VIRc	3.25063	+	6.10818	2.72019	1.65642
1	2188343	2188461	vir1_vs_VIRc	1.39633	-	21.0714	1.92559	1.24067
1	2211231	2211509	vir1_vs_VIRc	1.5906	-	54.8931	2.68302	1.75302
1	2218679	2218908	vir1_vs_VIRc	1.4571	-	52.0457	3.26287	2.1469
1	2222044	2222947	vir1_vs_VIRc	1.20006	-	145.77	5.58989	3.72096
1	2224897	2225039	vir1_vs_VIRc	1.27531	-	28.4365	1.8237	1.17134
1	2238087	2238176	vir1_vs_VIRc	1.60246	+	162.014	2.76795	1.68662
1	2238349	2239588	vir1_vs_VIRc	1.1156	+	264.706	5.13157	3.2025
1	2240102	2240387	vir1_vs_VIRc	1.88855	+	14.9656	2.29065	1.41492
1	2240615	2240738	vir1_vs_VIRc	1.95254	+	11.3024	1.77284	1.09836
1	2244747	2244912	vir1_vs_VIRc	1.90194	-	5.88102	1.98664	1.2824
1	2257988	2258448	vir1_vs_VIRc	1.13307	-	242.899	5.58989	3.72096
1	2258539	2259153	vir1_vs_VIRc	1.59532	-	97.0148	6.06701	3.9243
1	2259277	2259386	vir1_vs_VIRc	1.42329	-	167.303	4.11762	2.74763
1	2259486	2259586	vir1_vs_VIRc	1.75142	-	228.189	4.11762	2.74763
1	2260012	2260069	vir1_vs_VIRc	2.038	-	129.019	2.8725	1.87409
1	2266258	2266383	vir1_vs_VIRc	1.0747	-	52.7718	1.68791	1.07851
1	2266473	2266743	vir1_vs_VIRc	1.85136	-	29.5224	3.77698	2.50355
1	2266855	2267047	vir1_vs_VIRc	1.62753	-	19.4231	2.24061	1.45638
1	2267468	2267553	vir1_vs_VIRc	1.36326	-	25.9641	1.58119	1.00557
1	2267972	2268183	vir1_vs_VIRc	1.83119	-	28.8675	2.44594	1.59659
1	2268916	2269032	vir1_vs_VIRc	2.34232	-	20.2329	1.93325	1.24517
1	2269773	2270148	vir1_vs_VIRc	2.48908	+	8.20324	2.53876	1.55443
1	2272123	2272191	vir1_vs_VIRc	2.36527	+	13.3527	1.81996	1.12812
1	2272451	2272610	vir1_vs_VIRc	1.90954	+	11.424	2.31856	1.43363
1	2272740	2273479	vir1_vs_VIRc	2.37903	+	11.0167	4.36388	2.65457
1	2273551	2274250	vir1_vs_VIRc	1.90059	+	17.9152	3.50684	2.12432
1	2274315	2274478	vir1_vs_VIRc	2.04397	+	22.2734	2.19141	1.35501
1	2275088	2275590	vir1_vs_VIRc	1.53469	+	41.9672	3.09987	1.87826
1	2282561	2282686	vir1_vs_VIRc	1.35724	-	24.2269	1.64026	1.04562
1	2291663	2291848	vir1_vs_VIRc	1.19606	+	75.4673	2.24516	1.391
1	2305486	2305739	vir1_vs_VIRc	1.32772	+	43.8284	2.22515	1.37739
1	2307281	2307411	vir1_vs_VIRc	1.01732	+	85.1438	1.68719	1.04396
1	2311392	2311582	vir1_vs_VIRc	1.64506	-	23.7949	2.47163	1.61202
1	2311923	2312053	vir1_vs_VIRc	1.18244	-	27.0013	2.36674	1.54288
1	2313999	2314082	vir1_vs_VIRc	2.81339	+	5.43254	1.68848	1.045
1	2315228	2315400	vir1_vs_VIRc	1.08765	-	132.728	1.93658	1.24755
1	2315402	2315665	vir1_vs_VIRc	1.1182	-	99.9391	2.77101	1.81438
1	2315706	2316207	vir1_vs_VIRc	1.26737	-	100.42	4.11762	2.74763
1	2316309	2316418	vir1_vs_VIRc	1.5166	-	45.9712	2.0087	1.29568
1	2337125	2337320	vir1_vs_VIRc	1.47175	-	14.5472	1.92887	1.24286
1	2337368	2337593	vir1_vs_VIRc	1.48842	-	16.0288	2.77809	1.81781
1	2337666	2337837	vir1_vs_VIRc	1.67674	-	14.0451	1.85501	1.19299
1	2338128	2338237	vir1_vs_VIRc	1.38536	-	12.7364	1.72244	1.1029
1	2338666	2338985	vir1_vs_VIRc	1.51737	+	56.7594	3.80935	2.32245
1	2339039	2339129	vir1_vs_VIRc	1.00397	-	79.4121	1.5851	1.00857
1	2341555	2341696	vir1_vs_VIRc	1.22522	+	1574.88	2.16596	1.33864
1	2341782	2342004	vir1_vs_VIRc	1.04234	+	2698.92	2.47057	1.51253
1	2344537	2344697	vir1_vs_VIRc	2.11146	-	9.74741	1.84137	1.18359
1	2345362	2346162	vir1_vs_VIRc	2.51191	-	14.0875	5.36804	3.55501
1	2346245	2346389	vir1_vs_VIRc	3.28861	-	12.5546	2.58657	1.6894
1	2346630	2346760	vir1_vs_VIRc	2.59175	-	12.1743	1.88116	1.21099
1	2349285	2349956	vir1_vs_VIRc	1.27438	+	53.8001	3.53106	2.14224
1	2350010	2350181	vir1_vs_VIRc	1.13849	+	61.7641	2.0373	1.26109
1	2354808	2355764	vir1_vs_VIRc	1.2692	-	152.901	6.06701	3.9243
1	2361936	2362244	vir1_vs_VIRc	1.23286	-	91.6586	3.35521	2.204
1	2363691	2363762	vir1_vs_VIRc	1.50733	-	57.0822	1.59812	1.01775
1	2363858	2363929	vir1_vs_VIRc	1.68299	-	55.3414	1.60613	1.02275
1	2364296	2364367	vir1_vs_VIRc	1.31257	-	72.2535	1.8733	1.20529
1	2364454	2364522	vir1_vs_VIRc	1.04437	-	80.0568	1.61487	1.02843
1	2366005	2366185	vir1_vs_VIRc	1.69269	-	64.1165	2.72558	1.78268
1	2366321	2366581	vir1_vs_VIRc	1.6614	-	32.9642	3.4793	2.2958
1	2370679	2370889	vir1_vs_VIRc	1.18313	-	110.727	3.73055	2.46834
1	2372035	2372228	vir1_vs_VIRc	1.29991	-	76.4824	2.75674	1.80373
1	2372383	2372504	vir1_vs_VIRc	1.42501	-	103.721	2.84404	1.8552
1	2372596	2372662	vir1_vs_VIRc	1.46081	-	88.6629	1.97496	1.2742
1	2372784	2372939	vir1_vs_VIRc	1.12824	-	74.0844	2.78803	1.82192
1	2372950	2374205	vir1_vs_VIRc	1.42448	-	80.7115	6.06701	3.9243
1	2379800	2379924	vir1_vs_VIRc	2.47815	+	6.068	1.83795	1.1392
1	2381643	2381754	vir1_vs_VIRc	1.34997	+	31.1019	1.83356	1.13664
1	2381995	2382107	vir1_vs_VIRc	1.62707	+	50.8031	2.40882	1.48298
1	2382223	2382331	vir1_vs_VIRc	1.59858	+	45.3448	2.13952	1.32189
1	2382404	2382582	vir1_vs_VIRc	1.5282	+	43.8063	2.42169	1.491
1	2383347	2383553	vir1_vs_VIRc	1.13693	+	61.4686	2.42363	1.49166
1	2386148	2386195	vir1_vs_VIRc	inf	+	3.55382	2.20618	1.36423
1	2386555	2386707	vir1_vs_VIRc	3.40945	+	3.78649	2.00018	1.23962
1	2387339	2387483	vir1_vs_VIRc	2.98601	+	5.37931	2.13625	1.31978
1	2387502	2387648	vir1_vs_VIRc	3.58993	+	4.99773	1.79257	1.11101
1	2395490	2395657	vir1_vs_VIRc	1.29981	+	42.6255	2.47739	1.516
1	2405667	2405912	vir1_vs_VIRc	1.04877	-	153.214	3.05799	1.99996
1	2411953	2412086	vir1_vs_VIRc	1.66614	-	8.19154	1.82844	1.17417
1	2416611	2417365	vir1_vs_VIRc	1.58018	+	52.9672	4.05759	2.45595
1	2417525	2417982	vir1_vs_VIRc	1.28298	+	74.796	3.73862	2.2781
1	2418222	2418281	vir1_vs_VIRc	1.19954	+	104.829	1.81701	1.12615
1	2418374	2418495	vir1_vs_VIRc	1.27365	+	126.99	2.35269	1.45122
1	2418628	2418894	vir1_vs_VIRc	1.51198	+	76.6314	3.60192	2.18695
1	2431730	2431832	vir1_vs_VIRc	1.23519	-	45.5032	1.687	1.07806
1	2437384	2437799	vir1_vs_VIRc	1.93188	+	209.393	4.28647	2.59427
1	2437969	2438397	vir1_vs_VIRc	1.66905	+	2761.9	5.97666	3.84278
1	2438064	2438123	vir1_vs_VIRc	4.06665	-	5.67222	1.79232	1.15015
1	2438211	2438302	vir1_vs_VIRc	5.02237	-	5.34058	1.73117	1.10898
1	2438309	2438385	vir1_vs_VIRc	2.42959	-	5.70996	1.63131	1.03929
1	2438466	2439655	vir1_vs_VIRc	1.13292	+	2263.05	5.97666	3.84278
1	2438935	2439014	vir1_vs_VIRc	3.04054	-	7.75729	1.64088	1.04604
1	2439088	2439190	vir1_vs_VIRc	2.83177	-	13.966	1.9834	1.28045
1	2442584	2442759	vir1_vs_VIRc	2.65343	+	4.52273	2.08496	1.28858
1	2444216	2444370	vir1_vs_VIRc	-1.15895	+	18.1758	2.01978	1.25044
1	2444696	2444826	vir1_vs_VIRc	-1.20782	+	40.584	1.83162	1.13525
1	2444933	2445028	vir1_vs_VIRc	-1.27284	+	44.8073	1.90497	1.18326
1	2446700	2447104	vir1_vs_VIRc	2.13434	+	25.5687	3.72381	2.26565
1	2448929	2449057	vir1_vs_VIRc	2.21745	+	25.3734	2.23955	1.38763
1	2449344	2449499	vir1_vs_VIRc	1.79522	+	28.3429	2.42315	1.49141
1	2449654	2449753	vir1_vs_VIRc	1.3015	+	30.7158	2.05275	1.27002
1	2450487	2450566	vir1_vs_VIRc	1.63895	+	24.6906	1.68257	1.04095
1	2455660	2455862	vir1_vs_VIRc	1.88403	-	34.6802	3.85482	2.56055
1	2457080	2457152	vir1_vs_VIRc	2.53985	-	4.38014	1.60887	1.02441
1	2459030	2459239	vir1_vs_VIRc	1.52161	-	16.4829	2.01091	1.29701
1	2459612	2459816	vir1_vs_VIRc	1.75685	-	23.6854	1.90311	1.22608
1	2464491	2464832	vir1_vs_VIRc	1.17799	-	1364.21	5.22191	3.55501
1	2464863	2465076	vir1_vs_VIRc	1.50774	-	20.6102	2.42842	1.58605
1	2465410	2465456	vir1_vs_VIRc	1.27286	-	696.686	2.10289	1.36046
1	2471776	2471947	vir1_vs_VIRc	1.60601	-	28.3498	1.87828	1.20889
1	2472343	2472495	vir1_vs_VIRc	1.37791	-	38.8824	1.62405	1.0342
1	2477151	2477451	vir1_vs_VIRc	1.56378	+	70.7757	3.62064	2.19925
1	2477676	2477779	vir1_vs_VIRc	1.29493	+	72.3718	1.94473	1.207
1	2477966	2478052	vir1_vs_VIRc	1.46473	+	72.0977	1.96819	1.22059
1	2478186	2478261	vir1_vs_VIRc	1.93947	+	81.9726	2.7032	1.64912
1	2478388	2478462	vir1_vs_VIRc	1.65568	+	114.108	2.035	1.25985
1	2479123	2479239	vir1_vs_VIRc	1.1461	+	101.486	1.75842	1.0891
1	2479400	2479494	vir1_vs_VIRc	1.04642	+	116.932	1.86895	1.16006
1	2479590	2479798	vir1_vs_VIRc	1.41027	+	112.335	2.45671	1.50664
1	2480178	2480275	vir1_vs_VIRc	1.17737	+	103.871	2.05555	1.27104
1	2484304	2484428	vir1_vs_VIRc	1.11499	-	40.7033	1.81897	1.16755
1	2487239	2487415	vir1_vs_VIRc	1.08708	-	75.8545	2.25443	1.46624
1	2490377	2490426	vir1_vs_VIRc	1.057	-	118.295	2.52932	1.65081
1	2491215	2491355	vir1_vs_VIRc	1.11869	-	80.5603	2.30697	1.50418
1	2491434	2491574	vir1_vs_VIRc	1.20975	-	120.757	4.10797	2.74763
1	2491683	2491968	vir1_vs_VIRc	1.6334	-	95.4522	5.11277	3.46192
1	2492262	2492333	vir1_vs_VIRc	1.5127	-	67.5289	1.77156	1.13576
1	2492419	2492590	vir1_vs_VIRc	1.51075	-	77.0736	3.21514	2.11204
1	2492687	2492763	vir1_vs_VIRc	1.41327	-	69.6126	2.30172	1.50062
1	2493006	2493238	vir1_vs_VIRc	1.97337	-	65.1431	3.94974	2.62324
1	2499180	2499286	vir1_vs_VIRc	1.71706	-	13.2103	1.61118	1.02563
1	2500153	2500359	vir1_vs_VIRc	2.7067	-	7.07367	2.05633	1.32806
1	2500572	2500722	vir1_vs_VIRc	2.50027	-	11.7285	2.75802	1.80475
1	2501114	2501315	vir1_vs_VIRc	2.03095	-	8.39604	2.71696	1.77579
1	2502871	2502969	vir1_vs_VIRc	1.25337	-	37.9899	1.61906	1.03107
1	2503537	2503635	vir1_vs_VIRc	1.17887	-	41.4428	1.96606	1.26798
1	2503719	2503874	vir1_vs_VIRc	1.65302	-	33.0486	2.51059	1.63915
1	2504018	2504173	vir1_vs_VIRc	1.64478	-	45.4124	2.30411	1.50195
1	2504309	2504422	vir1_vs_VIRc	1.40981	-	41.3794	1.96181	1.2652
1	2504464	2504931	vir1_vs_VIRc	1.7146	-	33.2226	4.60461	3.09052
1	2505005	2505422	vir1_vs_VIRc	1.3452	-	38.4199	3.19954	2.10229
1	2505577	2505706	vir1_vs_VIRc	1.61472	-	21.8673	2.06213	1.3319
1	2506572	2506813	vir1_vs_VIRc	1.75036	-	21.9483	2.50484	1.63476
1	2506930	2507815	vir1_vs_VIRc	2.12643	-	22.3144	5.36804	3.55501
1	2508165	2508282	vir1_vs_VIRc	1.84104	-	23.1723	2.77409	1.81586
1	2508676	2508921	vir1_vs_VIRc	2.1753	-	25.7619	4.60461	3.09052
1	2509037	2509115	vir1_vs_VIRc	3.04817	-	21.712	2.66406	1.73871
1	2509239	2509693	vir1_vs_VIRc	2.25715	-	20.5227	4.74479	3.19022
1	2509697	2509853	vir1_vs_VIRc	1.97157	-	12.3493	2.47428	1.61381
1	2509869	2510493	vir1_vs_VIRc	2.21654	-	22.1724	5.36804	3.55501
1	2510781	2511054	vir1_vs_VIRc	3.74435	-	17.7263	5.58989	3.72096
1	2524104	2524630	vir1_vs_VIRc	3.74055	+	5.9883	5.49954	3.44049
1	2524692	2524946	vir1_vs_VIRc	2.93598	+	5.08137	2.52289	1.54518
1	2525384	2525965	vir1_vs_VIRc	4.25435	+	6.85023	5.13157	3.2025
1	2546058	2546139	vir1_vs_VIRc	1.19681	-	67.9776	1.66546	1.06203
1	2547030	2547276	vir1_vs_VIRc	1.11349	-	77.0735	2.13959	1.38612
1	2547371	2547835	vir1_vs_VIRc	1.32152	-	66.8265	3.60913	2.38934
1	2559953	2560149	vir1_vs_VIRc	1.03488	-	43.3443	2.97324	1.94612
1	2568161	2568433	vir1_vs_VIRc	1.16983	+	129.607	2.93017	1.77499
1	2568510	2568691	vir1_vs_VIRc	1.37146	+	137.125	2.38705	1.47155
1	2568788	2569046	vir1_vs_VIRc	1.52538	+	147.73	2.9171	1.76347
1	2569148	2569280	vir1_vs_VIRc	1.44753	+	144.343	2.21421	1.36979
1	2569369	2569460	vir1_vs_VIRc	1.20646	+	176.144	1.84042	1.14041
1	2569555	2569658	vir1_vs_VIRc	1.1555	+	191.945	1.86854	1.15979
1	2570210	2570301	vir1_vs_VIRc	1.02242	+	208.373	1.89463	1.17622
1	2579576	2579678	vir1_vs_VIRc	1.00939	-	96.2985	1.64202	1.04677
1	2580417	2580602	vir1_vs_VIRc	1.13473	-	85.1707	3.62453	2.3953
1	2584211	2584444	vir1_vs_VIRc	1.04279	-	148.089	3.32586	2.18994
1	2584264	2584392	vir1_vs_VIRc	2.74258	+	7.45413	1.77322	1.09847
1	2584520	2584710	vir1_vs_VIRc	1.48861	-	74.7173	3.23642	2.12666
1	2584800	2585572	vir1_vs_VIRc	1.60837	-	69.0332	5.58989	3.72096
1	2585574	2585843	vir1_vs_VIRc	1.72766	-	21.992	2.74791	1.79653
1	2585927	2586519	vir1_vs_VIRc	1.4299	-	251.663	5.22191	3.55501
1	2586217	2586570	vir1_vs_VIRc	1.91732	+	44.3512	3.42157	2.08223
1	2586613	2586729	vir1_vs_VIRc	1.3685	-	318.389	2.82922	1.84665
1	2586613	2586736	vir1_vs_VIRc	2.26503	+	30.5941	1.81984	1.12812
1	2588922	2590246	vir1_vs_VIRc	1.54871	-	96.1525	6.06701	3.9243
1	2592216	2592342	vir1_vs_VIRc	2.53197	+	10.6339	1.72238	1.06599
1	2592676	2592882	vir1_vs_VIRc	3.32688	+	8.66224	3.39574	2.0667
1	2594993	2595169	vir1_vs_VIRc	3.7648	+	11.1441	4.3856	2.65457
1	2595430	2595543	vir1_vs_VIRc	3.45964	+	11.2734	3.424	2.08406
1	2595966	2596070	vir1_vs_VIRc	2.79597	+	15.4675	2.00377	1.24166
1	2596267	2596385	vir1_vs_VIRc	2.59224	+	14.7647	2.29588	1.4185
1	2596475	2596619	vir1_vs_VIRc	2.50116	+	12.8213	2.11603	1.3073
1	2596694	2596788	vir1_vs_VIRc	2.252	+	15.1518	1.79143	1.11031
1	2596944	2597049	vir1_vs_VIRc	3.13398	+	12.0464	2.5474	1.55951
1	2597132	2597211	vir1_vs_VIRc	2.33874	+	12.275	1.68152	1.04016
1	2597308	2597484	vir1_vs_VIRc	2.72477	+	12.4765	2.20368	1.36259
1	2598769	2598864	vir1_vs_VIRc	2.45424	+	11.9479	1.69812	1.05163
1	2599010	2599210	vir1_vs_VIRc	2.15833	+	13.1774	2.42363	1.49166
1	2599765	2599907	vir1_vs_VIRc	1.84164	+	15.2646	2.25642	1.39651
1	2600085	2600284	vir1_vs_VIRc	2.31033	+	12.9629	2.20618	1.36423
1	2608039	2608867	vir1_vs_VIRc	1.72311	+	28.9281	4.25239	2.57537
1	2608969	2609247	vir1_vs_VIRc	1.42992	+	32.6287	2.46198	1.50997
1	2610607	2610740	vir1_vs_VIRc	1.64217	-	7.625	1.95794	1.26231
1	2615055	2615233	vir1_vs_VIRc	1.85638	+	9.6378	2.29101	1.41518
1	2616177	2616395	vir1_vs_VIRc	1.54967	+	12.6568	2.95177	1.78573
1	2617745	2617845	vir1_vs_VIRc	1.75362	+	11.0635	1.96973	1.22114
1	2618623	2618738	vir1_vs_VIRc	4.73471	+	3.17529	2.08619	1.28912
1	2620806	2620930	vir1_vs_VIRc	-1.4752	+	9.48333	1.64851	1.01966
1	2623282	2623436	vir1_vs_VIRc	1.27772	-	35.7516	2.00394	1.29281
1	2623718	2623942	vir1_vs_VIRc	1.41966	-	26.7693	2.34627	1.5305
1	2624256	2624333	vir1_vs_VIRc	1.92437	-	27.6624	2.08046	1.34421
1	2625603	2625830	vir1_vs_VIRc	2.25886	-	23.17	3.26698	2.15027
1	2631654	2631770	vir1_vs_VIRc	1.8779	+	9.03775	2.21707	1.37151
1	2631857	2631929	vir1_vs_VIRc	1.63557	+	12.3447	1.6624	1.02812
1	2634675	2635111	vir1_vs_VIRc	1.71243	-	20.7935	4.02169	2.67844
1	2635507	2635622	vir1_vs_VIRc	1.54526	-	18.9792	1.60812	1.02404
1	2638310	2638513	vir1_vs_VIRc	1.11627	+	121.438	2.57269	1.57487
1	2641044	2641274	vir1_vs_VIRc	1.696	+	160.74	2.80494	1.70838
1	2641492	2641564	vir1_vs_VIRc	1.51515	+	45.8767	1.74757	1.08187
1	2644753	2645069	vir1_vs_VIRc	1.50849	-	17.2029	2.96492	1.9399
1	2645711	2645891	vir1_vs_VIRc	2.19796	-	20.0737	3.6405	2.40646
1	2646226	2646533	vir1_vs_VIRc	1.11046	+	45.7982	2.52289	1.54518
1	2647821	2647900	vir1_vs_VIRc	1.74172	+	32.9083	1.90711	1.18454
1	2648133	2648305	vir1_vs_VIRc	1.11535	+	52.4162	2.01038	1.24527
1	2649203	2649341	vir1_vs_VIRc	-1.26845	+	14.5456	1.73884	1.07623
1	2649762	2650427	vir1_vs_VIRc	1.52268	+	58.7984	3.99894	2.43983
1	2651332	2651411	vir1_vs_VIRc	1.59795	+	120.726	2.0677	1.27784
1	2651495	2651589	vir1_vs_VIRc	1.63574	+	103.793	2.8732	1.74559
1	2651689	2651788	vir1_vs_VIRc	1.22208	+	114.974	1.87214	1.16228
1	2651866	2651935	vir1_vs_VIRc	1.38745	+	126.251	2.23955	1.38763
1	2652483	2652584	vir1_vs_VIRc	1.38305	+	114.457	2.31024	1.42811
1	2652661	2652742	vir1_vs_VIRc	1.67375	+	72.3018	2.00636	1.24276
1	2652966	2653145	vir1_vs_VIRc	1.46713	+	69.9782	2.11807	1.3087
1	2653459	2653726	vir1_vs_VIRc	1.43514	+	129.518	3.31296	2.01453
1	2653819	2654056	vir1_vs_VIRc	1.2691	+	102.751	2.65465	1.62243
1	2654248	2654377	vir1_vs_VIRc	1.01124	+	129.042	1.6481	1.01966
1	2654716	2654954	vir1_vs_VIRc	1.1011	+	130.328	2.48854	1.52225
1	2655045	2655129	vir1_vs_VIRc	1.25816	+	107.38	2.3249	1.43716
1	2658728	2659010	vir1_vs_VIRc	2.16912	+	32.4152	2.8808	1.74826
1	2659133	2659273	vir1_vs_VIRc	2.39132	+	40.5757	3.07521	1.86303
1	2659407	2659679	vir1_vs_VIRc	2.46653	+	45.6639	3.99894	2.43983
1	2659774	2659895	vir1_vs_VIRc	2.21348	+	34.5902	2.93173	1.77538
1	2659983	2660126	vir1_vs_VIRc	2.57432	+	45.4427	2.69495	1.64425
1	2660439	2661074	vir1_vs_VIRc	1.81826	+	33.5001	4.25239	2.57537
1	2670607	2670799	vir1_vs_VIRc	1.02516	-	199.987	2.59149	1.69013
1	2673172	2673296	vir1_vs_VIRc	2.88409	-	5.96267	1.71212	1.09567
1	2687704	2687890	vir1_vs_VIRc	1.03947	-	168.689	2.88603	1.88495
1	2687966	2688260	vir1_vs_VIRc	1.39144	-	142.076	4.83656	3.27435
1	2688350	2688576	vir1_vs_VIRc	1.39319	-	142.077	3.77698	2.50355
1	2701226	2701363	vir1_vs_VIRc	1.06512	+	39.9764	1.77694	1.10064
1	2703374	2703539	vir1_vs_VIRc	1.31874	+	220.57	2.73239	1.66194
1	2704080	2704261	vir1_vs_VIRc	1.08763	+	292.795	2.79454	1.70407
1	2705549	2705637	vir1_vs_VIRc	inf	-	2.54869	2.23932	1.45547
1	2707095	2707193	vir1_vs_VIRc	1.26857	+	38.6667	1.63751	1.01333
1	2707454	2707585	vir1_vs_VIRc	1.38965	-	19.3441	1.63763	1.04349
1	2712931	2713295	vir1_vs_VIRc	1.22001	+	442.029	3.75918	2.29151
1	2713547	2713723	vir1_vs_VIRc	1.08853	+	661.413	3.41916	2.0816
1	2713581	2713723	vir1_vs_VIRc	1.8319	-	25.0245	3.23771	2.12777
1	2713794	2713973	vir1_vs_VIRc	1.24773	+	614.734	3.24831	1.96689
1	2718841	2719049	vir1_vs_VIRc	4.43169	+	5.11404	2.59375	1.58791
1	2719474	2719652	vir1_vs_VIRc	2.99755	+	4.61872	1.74172	1.07803
1	2721079	2721390	vir1_vs_VIRc	2.53811	-	10.7361	3.3977	2.2368
1	2721248	2721360	vir1_vs_VIRc	1.7659	+	9.72345	1.71338	1.06099
1	2721527	2721809	vir1_vs_VIRc	2.01599	-	12.8283	2.64821	1.72817
1	2723767	2723938	vir1_vs_VIRc	2.85858	+	24.875	3.05916	1.8547
1	2724075	2724133	vir1_vs_VIRc	2.00035	+	43.3277	1.95181	1.21086
1	2724543	2724876	vir1_vs_VIRc	1.8138	+	38.9489	3.99894	2.43983
1	2724961	2725023	vir1_vs_VIRc	2.06255	+	39.295	2.0151	1.24808
1	2725122	2725217	vir1_vs_VIRc	1.91118	+	39.7509	2.0974	1.29621
1	2725300	2725392	vir1_vs_VIRc	1.77874	+	50.4633	1.82209	1.12883
1	2725503	2725693	vir1_vs_VIRc	1.7256	+	50.0624	2.66132	1.62465
1	2725778	2726021	vir1_vs_VIRc	1.81859	+	44.7278	3.16845	1.91797
1	2726533	2726646	vir1_vs_VIRc	1.60144	+	47.2427	1.78519	1.10569
1	2727448	2727801	vir1_vs_VIRc	1.65501	+	42.0445	3.46478	2.10657
1	2728250	2728447	vir1_vs_VIRc	1.48313	+	35.1296	2.0361	1.26042
1	2728454	2728563	vir1_vs_VIRc	1.39006	+	37.5174	1.81395	1.1241
1	2728659	2728749	vir1_vs_VIRc	1.46161	+	40.065	2.32162	1.43565
1	2728855	2729064	vir1_vs_VIRc	1.55674	+	52.4599	2.6811	1.63754
1	2729216	2729335	vir1_vs_VIRc	1.70368	+	53.4646	2.48769	1.52178
1	2729475	2729641	vir1_vs_VIRc	1.60606	+	50.1307	2.4268	1.49268
1	2730002	2730143	vir1_vs_VIRc	1.74983	+	69.0299	2.44968	1.50143
1	2730402	2730551	vir1_vs_VIRc	1.38592	+	72.7456	2.47602	1.515
1	2730782	2731079	vir1_vs_VIRc	1.37654	+	67.0484	2.80028	1.70627
1	2731223	2731352	vir1_vs_VIRc	1.67264	+	64.6692	3.23709	1.95775
1	2731763	2731818	vir1_vs_VIRc	1.44676	+	53.8988	1.70064	1.05291
1	2731933	2732139	vir1_vs_VIRc	1.11627	+	60.5692	2.44049	1.49885
1	2736721	2736846	vir1_vs_VIRc	3.06604	+	13.1878	2.84537	1.73054
1	2737203	2737341	vir1_vs_VIRc	2.3623	+	30.2086	2.90737	1.76087
1	2737538	2737865	vir1_vs_VIRc	1.70577	+	56.0973	3.31108	2.01373
1	2738161	2738238	vir1_vs_VIRc	1.42621	+	65.7981	1.73489	1.07348
1	2738325	2738852	vir1_vs_VIRc	2.09835	+	48.5177	4.3856	2.65457
1	2738949	2739176	vir1_vs_VIRc	2.01793	+	50.6754	5.49954	3.44049
1	2739586	2739747	vir1_vs_VIRc	1.66158	+	58.1132	3.11633	1.88623
1	2740058	2740426	vir1_vs_VIRc	1.45632	+	67.5056	3.90112	2.38074
1	2740828	2742094	vir1_vs_VIRc	1.60064	+	69.8155	5.97666	3.84278
1	2742184	2742287	vir1_vs_VIRc	1.79433	+	77.3117	2.42412	1.49166
1	2742635	2742832	vir1_vs_VIRc	1.10248	+	111.172	2.99757	1.81773
1	2743846	2743986	vir1_vs_VIRc	-1.8943	-	20.2861	1.81823	1.16717
1	2752164	2753010	vir1_vs_VIRc	1.42792	+	221.318	5.97666	3.84278
1	2753183	2753587	vir1_vs_VIRc	1.02017	+	147.552	3.90848	2.38538
1	2758531	2758732	vir1_vs_VIRc	1.09695	-	104.495	2.8358	1.85079
1	2758817	2758908	vir1_vs_VIRc	1.01366	-	109.981	1.94137	1.25068
1	2759406	2759485	vir1_vs_VIRc	1.49686	-	100.454	2.36432	1.54121
1	2759572	2759757	vir1_vs_VIRc	1.34612	-	87.5381	2.90475	1.89727
1	2762604	2762919	vir1_vs_VIRc	1.7454	+	96.544	3.79769	2.31743
1	2763298	2763359	vir1_vs_VIRc	2.06086	+	80.547	2.86172	1.741
1	2764236	2764323	vir1_vs_VIRc	1.47097	+	76.1061	3.79769	2.31743
1	2764410	2764471	vir1_vs_VIRc	1.32191	+	72.2715	2.46465	1.51031
1	2764593	2764689	vir1_vs_VIRc	1.72362	+	75.0524	2.51113	1.53823
1	2765056	2765451	vir1_vs_VIRc	1.38979	+	111.106	3.28914	1.99528
1	2765575	2765971	vir1_vs_VIRc	1.17704	+	146.305	2.78549	1.69787
1	2770264	2770393	vir1_vs_VIRc	1.42309	+	14.0679	1.8463	1.14426
1	2771027	2771374	vir1_vs_VIRc	1.21443	-	138.027	4.10797	2.74763
1	2774048	2774499	vir1_vs_VIRc	1.55841	+	42.5225	3.31675	2.01614
1	2774851	2774951	vir1_vs_VIRc	1.62536	+	39.2104	1.62493	1.00458
1	2775790	2776057	vir1_vs_VIRc	1.36353	+	49.1073	2.397	1.47664
1	2776402	2776543	vir1_vs_VIRc	1.16522	+	50.3509	1.82392	1.12986
1	2802451	2802589	vir1_vs_VIRc	1.0646	+	54.0749	2.29227	1.41595
1	2802778	2802823	vir1_vs_VIRc	2.99077	+	4.7663	1.90028	1.18066
1	2805955	2806273	vir1_vs_VIRc	1.24498	+	50.3393	2.48404	1.5204
1	2814254	2814414	vir1_vs_VIRc	1.03847	-	73.8835	2.11602	1.3692
1	2814604	2814736	vir1_vs_VIRc	1.47268	-	39.3954	1.7716	1.13576
1	2814957	2815098	vir1_vs_VIRc	1.41692	-	41.9935	1.98888	1.28357
1	2815170	2815391	vir1_vs_VIRc	1.21218	-	46.9354	3.04707	1.99273
1	2815404	2816107	vir1_vs_VIRc	1.5084	-	39.1831	4.74479	3.19022
1	2816502	2817158	vir1_vs_VIRc	1.91258	-	32.7221	5.22191	3.55501
1	2817718	2817863	vir1_vs_VIRc	2.64207	-	12.0291	2.42643	1.58465
1	2819802	2819858	vir1_vs_VIRc	1.14755	-	38.6316	1.67493	1.06987
1	2819970	2820099	vir1_vs_VIRc	1.05108	-	45.5692	2.17419	1.41128
1	2820197	2820343	vir1_vs_VIRc	1.29958	-	38.2421	2.40738	1.57066
1	2829369	2829500	vir1_vs_VIRc	-2.30336	-	8.55934	2.04199	1.31867
1	2830991	2831063	vir1_vs_VIRc	1.87008	-	10.661	1.90269	1.22573
1	2833290	2833399	vir1_vs_VIRc	1.82914	-	9.62045	1.93306	1.24505
1	2836926	2837067	vir1_vs_VIRc	1.93328	-	5.88263	1.95957	1.26359
1	2838064	2838351	vir1_vs_VIRc	2.71609	-	7.30584	3.49999	2.30933
1	2855791	2855886	vir1_vs_VIRc	-2.00852	+	6.80729	1.69014	1.04582
1	2856179	2856249	vir1_vs_VIRc	2.01824	+	17.3521	2.1513	1.33017
1	2856421	2856483	vir1_vs_VIRc	1.73881	+	36.7778	1.90733	1.18455
1	2856606	2856680	vir1_vs_VIRc	1.69697	+	36.6667	1.73489	1.07348
1	2856941	2857006	vir1_vs_VIRc	2.06573	+	32.4154	1.71901	1.06433
1	2857087	2857169	vir1_vs_VIRc	1.91204	+	37.8394	1.99534	1.23646
1	2857385	2857502	vir1_vs_VIRc	1.69691	+	28.7387	2.15456	1.33194
1	2857779	2857846	vir1_vs_VIRc	2.09869	+	49.9314	1.78018	1.10259
1	2857936	2857984	vir1_vs_VIRc	2.01331	+	43.4405	1.72935	1.06974
1	2858076	2858194	vir1_vs_VIRc	2.18018	+	27.0406	2.58274	1.58103
1	2858197	2858338	vir1_vs_VIRc	2.55018	+	33.5851	2.85314	1.73493
1	2858503	2858554	vir1_vs_VIRc	2.36876	+	52.8862	2.08675	1.2896
1	2858993	2859110	vir1_vs_VIRc	1.56142	+	47.2331	2.07997	1.28606
1	2859227	2859688	vir1_vs_VIRc	1.47888	+	62.4663	3.39574	2.0667
1	2859726	2859846	vir1_vs_VIRc	1.29646	+	71.8292	1.83412	1.13688
1	2859953	2860454	vir1_vs_VIRc	1.11465	+	88.71	3.56002	2.15349
1	2870236	2870579	vir1_vs_VIRc	-1.08782	+	150.704	3.83365	2.34465
1	2877695	2877846	vir1_vs_VIRc	1.2185	+	42.1754	1.93745	1.20262
1	2877707	2877854	vir1_vs_VIRc	3.33021	-	3.46171	1.73548	1.11176
1	2879922	2880044	vir1_vs_VIRc	1.09006	+	23.3157	1.68714	1.04396
1	2880156	2880287	vir1_vs_VIRc	1.58814	+	22.5297	1.96836	1.22068
1	2882687	2882758	vir1_vs_VIRc	2.70913	+	5	2.66343	1.62572
1	2888860	2888998	vir1_vs_VIRc	2.22483	+	7.31775	1.95214	1.21112
1	2889325	2889500	vir1_vs_VIRc	1.94144	+	11.3366	2.46225	1.50997
1	2897266	2897470	vir1_vs_VIRc	1.13912	-	203.35	2.51349	1.64132
1	2897840	2898229	vir1_vs_VIRc	1.32155	-	103.771	3.4052	2.2398
1	2898305	2898363	vir1_vs_VIRc	1.40044	-	123.476	2.28247	1.48651
1	2898448	2898672	vir1_vs_VIRc	1.55297	-	143.753	3.33382	2.19441
1	2898762	2898900	vir1_vs_VIRc	1.35774	-	133.659	2.00222	1.29159
1	2899139	2899359	vir1_vs_VIRc	1.34801	-	145.161	3.00443	1.96334
1	2903243	2903419	vir1_vs_VIRc	1.04055	-	123.878	2.12675	1.37685
1	2903853	2903940	vir1_vs_VIRc	1.28474	-	124.699	2.00779	1.29513
1	2904088	2904802	vir1_vs_VIRc	1.24827	-	152.689	5.22191	3.55501
1	2912653	2912838	vir1_vs_VIRc	2.47384	+	9.07213	2.64727	1.61897
1	2918050	2918267	vir1_vs_VIRc	2.43001	+	11.1953	2.8993	1.75515
1	2918613	2918756	vir1_vs_VIRc	1.95176	+	13.5799	1.97558	1.2243
1	2919801	2919914	vir1_vs_VIRc	1.5884	+	17.1974	1.67392	1.03545
1	2923167	2923577	vir1_vs_VIRc	1.04503	-	114.887	3.70718	2.4554
1	2923619	2923717	vir1_vs_VIRc	1.0566	-	128.545	1.62672	1.0361
1	2923973	2924105	vir1_vs_VIRc	1.0483	-	134.054	2.16747	1.40708
1	2924209	2924308	vir1_vs_VIRc	1.18253	-	125.907	2.35026	1.53292
1	2924406	2924548	vir1_vs_VIRc	1.15402	-	122.544	2.69576	1.76167
1	2924649	2924988	vir1_vs_VIRc	1.02705	-	128.876	4.60461	3.09052
1	2927500	2927624	vir1_vs_VIRc	2.38202	+	7.40133	2.08174	1.28706
1	2929844	2930081	vir1_vs_VIRc	3.37888	-	5.10644	3.21514	2.11204
1	2930423	2930559	vir1_vs_VIRc	5.34363	-	3.21411	1.77376	1.13736
1	2932770	2932921	vir1_vs_VIRc	2.41151	+	4.96546	1.72705	1.0688
1	2933339	2933443	vir1_vs_VIRc	5.12948	+	6.00079	1.70499	1.05577
1	2934119	2934389	vir1_vs_VIRc	5.01241	+	4.44096	2.46733	1.51118
1	2934549	2934650	vir1_vs_VIRc	3.248	+	8.86193	2.0678	1.27786
1	2934793	2934935	vir1_vs_VIRc	3.2025	+	6.42308	2.09935	1.29722
1	2935269	2935383	vir1_vs_VIRc	3.03552	+	6.51957	1.84367	1.14227
1	2936049	2936194	vir1_vs_VIRc	2.43327	+	8.67009	2.19815	1.35932
1	2943856	2943983	vir1_vs_VIRc	2.04505	-	14.2591	1.619	1.03107
1	2944072	2944167	vir1_vs_VIRc	1.64886	-	11.4418	2.2839	1.48741
1	2945212	2945302	vir1_vs_VIRc	5.12686	+	3.35714	1.81335	1.12364
1	2945732	2945949	vir1_vs_VIRc	1.02221	-	331.628	3.86562	2.56688
1	2967225	2967382	vir1_vs_VIRc	1.86856	-	9.38186	2.95274	1.93128
1	2970573	2970706	vir1_vs_VIRc	1.47456	-	24.8078	1.77776	1.13964
1	2971288	2971390	vir1_vs_VIRc	1.4171	-	17.8803	1.60954	1.02475
1	2975562	2975754	vir1_vs_VIRc	1.12283	-	384.589	4.47595	2.9942
1	2975849	2975956	vir1_vs_VIRc	1.12621	-	464.451	3.89383	2.58402
1	2978661	2978760	vir1_vs_VIRc	1.96619	-	5.12	1.88122	1.21099
1	2982418	2982590	vir1_vs_VIRc	1.11478	-	57.5819	2.17032	1.40896
1	2994439	2994736	vir1_vs_VIRc	1.14784	+	200.636	3.06551	1.85757
1	2997960	2998116	vir1_vs_VIRc	-1.02823	+	38.2569	1.83525	1.13738
1	2998686	2998836	vir1_vs_VIRc	3.0299	+	5.73731	2.08263	1.28769
1	3000028	3000133	vir1_vs_VIRc	1.28506	-	79.4976	1.92092	1.23762
1	3000556	3000717	vir1_vs_VIRc	1.28599	-	112.527	2.25995	1.46962
1	3011384	3011494	vir1_vs_VIRc	1.05365	-	38.6434	1.60304	1.02058
1	3015854	3015943	vir1_vs_VIRc	1.83147	+	11.4861	2.19141	1.35501
1	3016111	3016169	vir1_vs_VIRc	1.53538	-	17.5494	1.59612	1.01661
1	3016248	3016334	vir1_vs_VIRc	1.35623	-	25.91	1.59316	1.01456
1	3017045	3017203	vir1_vs_VIRc	1.81487	-	45.9382	2.37057	1.54512
1	3017677	3017766	vir1_vs_VIRc	2.10796	-	27.862	2.1134	1.36745
1	3017859	3017934	vir1_vs_VIRc	1.72128	-	23.7434	1.6233	1.03361
1	3033797	3033895	vir1_vs_VIRc	2.00321	+	6.61532	1.80755	1.12016
1	3035489	3035830	vir1_vs_VIRc	2.53712	+	7.68299	3.06444	1.85757
1	3035979	3036139	vir1_vs_VIRc	2.07156	+	10.1429	2.01863	1.24956
1	3037201	3037323	vir1_vs_VIRc	2.39705	+	11.456	2.06513	1.27662
1	3038580	3038681	vir1_vs_VIRc	3.80885	+	4.23203	1.82075	1.12829
1	3042754	3042899	vir1_vs_VIRc	3.52326	-	5.9492	1.67017	1.06595
1	3064465	3064594	vir1_vs_VIRc	1.66742	+	9.98333	1.80661	1.11936
1	3066737	3067133	vir1_vs_VIRc	1.76342	+	140.584	3.87286	2.36232
1	3067142	3067513	vir1_vs_VIRc	1.76979	+	171.048	4.69791	2.86039
1	3067617	3067808	vir1_vs_VIRc	1.35176	+	309.112	3.64021	2.21375
1	3067811	3068263	vir1_vs_VIRc	1.13689	+	263.261	4.16375	2.50783
1	3087176	3087313	vir1_vs_VIRc	2.94618	+	6.55133	1.69675	1.0505
1	3093694	3094011	vir1_vs_VIRc	1.68774	+	223.169	3.98103	2.43024
1	3094095	3094624	vir1_vs_VIRc	1.30173	+	509.775	4.36388	2.65457
1	3098172	3098713	vir1_vs_VIRc	1.10907	-	286.986	3.84953	2.55967
1	3098347	3098547	vir1_vs_VIRc	3.28856	+	6.52446	2.62817	1.60808
1	3098735	3099225	vir1_vs_VIRc	1.24014	-	231.844	3.54457	2.34038
1	3100147	3100249	vir1_vs_VIRc	1.35209	-	184.985	1.90436	1.22683
1	3100461	3100663	vir1_vs_VIRc	1.37188	-	60.1297	2.61477	1.70376
1	3101371	3101616	vir1_vs_VIRc	-2.19899	+	10.0315	2.94044	1.78094
1	3101623	3102276	vir1_vs_VIRc	-1.61049	-	40.4555	5.36804	3.55501
1	3102452	3102882	vir1_vs_VIRc	-1.06355	-	30.3815	3.71483	2.45647
1	3114664	3116469	vir1_vs_VIRc	1.22858	-	214.008	6.06701	3.9243
1	3116568	3116681	vir1_vs_VIRc	1.59404	-	91.0577	1.84704	1.18766
1	3119934	3120008	vir1_vs_VIRc	1.00557	+	341.983	2.35104	1.45076
1	3120117	3120170	vir1_vs_VIRc	1.00697	+	704.215	2.4741	1.51418
1	3122090	3122191	vir1_vs_VIRc	3.15007	-	3.60703	1.78623	1.14529
1	3134608	3134740	vir1_vs_VIRc	2.34063	-	7.57393	1.68433	1.07619
1	3141094	3141198	vir1_vs_VIRc	1.75653	+	25.3556	2.15234	1.33076
1	3141294	3141484	vir1_vs_VIRc	1.74938	+	35.3063	3.35238	2.04185
1	3142030	3142398	vir1_vs_VIRc	1.75215	+	34.2552	4.3856	2.65457
1	3142930	3143074	vir1_vs_VIRc	1.53822	+	50.2787	2.1803	1.3474
1	3143271	3143425	vir1_vs_VIRc	1.38209	+	50.8898	2.10422	1.30009
1	3143895	3144006	vir1_vs_VIRc	1.13738	+	56.5967	1.87903	1.16657
1	3149825	3150008	vir1_vs_VIRc	2.03908	-	9.01857	2.97535	1.94637
1	3153321	3153670	vir1_vs_VIRc	1.56606	-	63.3864	4.02169	2.67844
1	3153675	3153754	vir1_vs_VIRc	1.44943	-	63.6406	1.95451	1.26014
1	3154098	3154268	vir1_vs_VIRc	1.37617	-	66.268	2.11973	1.37218
1	3157517	3157817	vir1_vs_VIRc	1.25384	+	308.263	2.66048	1.6244
1	3157878	3158039	vir1_vs_VIRc	1.6719	-	6.71451	1.98484	1.28131
1	3161854	3162178	vir1_vs_VIRc	1.47694	+	236.274	4.45815	2.68825
1	3162444	3162698	vir1_vs_VIRc	1.26946	+	243.431	3.64423	2.21631
1	3182478	3182663	vir1_vs_VIRc	1.40811	-	29.4767	2.15061	1.3945
1	3187763	3187958	vir1_vs_VIRc	1.64818	+	12.7143	2.66725	1.62879
1	3190536	3190631	vir1_vs_VIRc	1.00643	-	28.0599	1.62255	1.03308
1	3190852	3190992	vir1_vs_VIRc	1.30433	-	25.026	1.99775	1.28864
1	3191971	3192078	vir1_vs_VIRc	1.36704	-	11.8596	2.70737	1.76902
1	3192196	3192457	vir1_vs_VIRc	1.76431	-	17.4332	2.78123	1.81966
1	3199161	3199253	vir1_vs_VIRc	1.05115	-	130.441	1.77562	1.13844
1	3200036	3200209	vir1_vs_VIRc	1.21968	-	62.2423	2.74459	1.7951
1	3205798	3205917	vir1_vs_VIRc	1.23767	+	65.6035	1.67757	1.03773
1	3215327	3215445	vir1_vs_VIRc	2.84181	-	5.30882	2.16867	1.40779
1	3218057	3218258	vir1_vs_VIRc	1.26513	+	56.6898	1.97889	1.22676
1	3222912	3223031	vir1_vs_VIRc	1.1237	-	42.9215	1.93748	1.2481
1	3223528	3223645	vir1_vs_VIRc	1.12371	-	44.2465	1.72508	1.10482
1	3230531	3230662	vir1_vs_VIRc	2.33951	-	13.6035	2.09513	1.35464
1	3231065	3231184	vir1_vs_VIRc	1.99358	-	27.8521	2.50294	1.63338
1	3231544	3231632	vir1_vs_VIRc	2.43749	-	18.9625	2.54548	1.66247
1	3231737	3231811	vir1_vs_VIRc	2.13629	-	24.0256	1.6853	1.07699
1	3232017	3232137	vir1_vs_VIRc	2.43091	-	27.1322	3.04707	1.99273
1	3244252	3244424	vir1_vs_VIRc	1.81916	+	21.697	2.16195	1.33628
1	3252251	3254964	vir1_vs_VIRc	1.4845	+	298.05	5.97666	3.84278
1	3254556	3254700	vir1_vs_VIRc	2.14138	-	14.5374	2.84664	1.85671
1	3255381	3255583	vir1_vs_VIRc	1.71758	-	12.0197	2.97605	1.94637
1	3257385	3257544	vir1_vs_VIRc	1.11349	-	74.35	2.56554	1.67472
1	3258637	3258770	vir1_vs_VIRc	1.23122	-	75.7345	2.2226	1.44331
1	3258865	3259104	vir1_vs_VIRc	1.27441	-	52.4875	3.15161	2.06755
1	3259735	3259895	vir1_vs_VIRc	1.50151	-	61.4767	2.43506	1.58974
1	3260178	3260332	vir1_vs_VIRc	1.29996	-	68.2747	2.42504	1.58364
1	3260509	3260594	vir1_vs_VIRc	1.57488	-	56.6328	1.80577	1.1585
1	3260694	3261033	vir1_vs_VIRc	1.83575	-	48.2537	5.22191	3.55501
1	3261328	3261687	vir1_vs_VIRc	2.20195	-	31.6132	4.37682	2.92637
1	3275764	3275899	vir1_vs_VIRc	-2.33906	+	9.50919	2.00674	1.24289
1	3279312	3279560	vir1_vs_VIRc	1.95508	+	15.334	2.87595	1.74636
1	3279704	3279849	vir1_vs_VIRc	1.49758	+	21.984	2.08008	1.28606
1	3280286	3280596	vir1_vs_VIRc	1.75414	+	17.1919	2.65424	1.62243
1	3281096	3281277	vir1_vs_VIRc	1.7678	+	23.3338	2.32047	1.4349
1	3281701	3282246	vir1_vs_VIRc	1.5137	+	30.9116	3.19779	1.92946
1	3282329	3282481	vir1_vs_VIRc	1.43976	+	30.8486	2.18002	1.3474
1	3282610	3282750	vir1_vs_VIRc	1.4254	+	33.1927	1.8682	1.15952
1	3284325	3284501	vir1_vs_VIRc	1.91476	+	36.2213	2.57269	1.57487
1	3285425	3285601	vir1_vs_VIRc	1.17228	+	48.105	2.00506	1.2426
1	3290050	3290405	vir1_vs_VIRc	-1.16983	+	153.44	3.36707	2.04895
1	3295001	3295165	vir1_vs_VIRc	1.10397	-	46.8187	1.85098	1.19038
1	3295176	3295334	vir1_vs_VIRc	1.90163	-	31.5781	2.22322	1.44359
1	3310998	3311171	vir1_vs_VIRc	1.6652	+	63.4047	2.30281	1.42369
1	3312399	3312535	vir1_vs_VIRc	1.66962	+	47.0219	2.19084	1.35463
1	3312921	3312995	vir1_vs_VIRc	1.48502	+	66.9589	2.03026	1.25722
1	3313228	3313273	vir1_vs_VIRc	1.65849	+	83.3478	1.64364	1.01666
1	3313604	3313663	vir1_vs_VIRc	1.88751	+	85.1736	2.02324	1.2527
1	3313764	3313844	vir1_vs_VIRc	1.94877	+	74.142	2.14002	1.32222
1	3314106	3314191	vir1_vs_VIRc	1.8772	+	61.563	1.98913	1.2332
1	3314347	3314448	vir1_vs_VIRc	1.59404	+	69.3235	2.36696	1.46035
1	3315074	3315175	vir1_vs_VIRc	1.45998	+	95.4158	1.91866	1.19131
1	3315895	3316039	vir1_vs_VIRc	1.16413	+	62.3144	2.05347	1.27002
1	3316382	3316489	vir1_vs_VIRc	1.64727	+	66.2299	2.4448	1.49951
1	3316928	3317080	vir1_vs_VIRc	1.3973	+	49.6836	2.37168	1.46342
1	3317338	3317442	vir1_vs_VIRc	1.54278	+	47.823	2.49738	1.52805
1	3317799	3317931	vir1_vs_VIRc	1.25392	+	62.6585	2.03115	1.25778
1	3319904	3320010	vir1_vs_VIRc	1.10093	+	78.7874	1.66795	1.03197
1	3325874	3326007	vir1_vs_VIRc	1.15056	+	47.8675	2.05513	1.2707
1	3329019	3329279	vir1_vs_VIRc	3.0088	+	7.79215	3.71421	2.26072
1	3329305	3329872	vir1_vs_VIRc	2.64649	+	6.71596	3.38007	2.0591
1	3329389	3329506	vir1_vs_VIRc	2.64209	-	4.34746	1.8852	1.2143
1	3330013	3330159	vir1_vs_VIRc	9.0954	-	3.72789	2.08542	1.34786
1	3330296	3330492	vir1_vs_VIRc	2.50828	+	10.0398	2.39654	1.47641
1	3330690	3330943	vir1_vs_VIRc	2.84187	+	9.09416	2.91408	1.76278
1	3331036	3331144	vir1_vs_VIRc	1.88468	+	14.0925	1.80991	1.12139
1	3331288	3331589	vir1_vs_VIRc	2.41701	+	14.1247	3.424	2.08406
1	3331647	3331858	vir1_vs_VIRc	1.8141	+	17.059	2.17042	1.3414
1	3332236	3332379	vir1_vs_VIRc	1.51785	+	15.0521	1.76232	1.09152
1	3332252	3332376	vir1_vs_VIRc	7.74551	-	2.87467	1.66059	1.0592
1	3332496	3332606	vir1_vs_VIRc	5.00768	-	3.06306	1.84866	1.18903
1	3335245	3337558	vir1_vs_VIRc	1.40418	-	112.756	6.06701	3.9243
1	3337945	3338123	vir1_vs_VIRc	1.79356	-	47.3641	2.92244	1.9102
1	3339047	3339235	vir1_vs_VIRc	1.09042	-	100.769	3.32429	2.18971
1	3339596	3339828	vir1_vs_VIRc	1.20923	-	64.7918	3.10654	2.03528
1	3339912	3340034	vir1_vs_VIRc	1.37375	-	64.8916	2.38859	1.55734
1	3340139	3340929	vir1_vs_VIRc	1.33239	-	71.6082	5.58989	3.72096
1	3341076	3341170	vir1_vs_VIRc	1.98	-	60.8228	3.48155	2.2958
1	3341399	3341535	vir1_vs_VIRc	1.61822	-	48.7974	2.68734	1.75699
1	3346803	3346883	vir1_vs_VIRc	2.0854	+	12.1872	1.66114	1.02762
1	3347021	3347110	vir1_vs_VIRc	2.17006	+	17.7389	2.05932	1.27364
1	3349827	3350001	vir1_vs_VIRc	1.43117	+	42.4252	1.8837	1.16934
1	3352377	3352487	vir1_vs_VIRc	-2.73663	+	6.25526	1.63049	1.00866
1	3358336	3358500	vir1_vs_VIRc	1.3836	-	31.1374	2.58058	1.68569
1	3358748	3358843	vir1_vs_VIRc	1.78922	-	23.4922	1.61798	1.03043
1	3358943	3359136	vir1_vs_VIRc	1.94254	-	25.5924	2.95274	1.93128
1	3363493	3365075	vir1_vs_VIRc	2.20972	+	21.7701	5.97666	3.84278
1	3365144	3366019	vir1_vs_VIRc	1.70208	+	38.0004	5.97666	3.84278
1	3367356	3367436	vir1_vs_VIRc	1.67385	-	14.3827	1.98736	1.28263
1	3368143	3368253	vir1_vs_VIRc	1.15921	-	20.2012	1.93787	1.24815
1	3368787	3368977	vir1_vs_VIRc	2.23228	-	9.30148	1.90663	1.22807
1	3370535	3370914	vir1_vs_VIRc	1.36284	+	123.153	3.47016	2.1082
1	3371197	3371248	vir1_vs_VIRc	1.36002	+	129.712	1.79968	1.11573
1	3371345	3371465	vir1_vs_VIRc	1.54677	+	136.328	2.70181	1.64866
1	3371595	3371687	vir1_vs_VIRc	1.32612	+	144.801	2.36611	1.45972
1	3372032	3372093	vir1_vs_VIRc	1.01669	+	154.02	1.766	1.09349
1	3372264	3372381	vir1_vs_VIRc	1.12128	+	145.974	1.80176	1.1169
1	3372528	3372865	vir1_vs_VIRc	1.09013	+	132.527	2.53215	1.55124
1	3373444	3373545	vir1_vs_VIRc	1.02564	+	169.036	2.51924	1.5439
1	3374978	3375054	vir1_vs_VIRc	3.14578	-	7.921	1.64651	1.04926
1	3375125	3375181	vir1_vs_VIRc	3.22274	-	11.3026	1.58576	1.00896
1	3384437	3384588	vir1_vs_VIRc	1.17419	-	54.1223	1.96311	1.26601
1	3384590	3384787	vir1_vs_VIRc	1.24751	-	54.8994	2.55983	1.6713
1	3384926	3385058	vir1_vs_VIRc	1.41906	-	47.4549	1.98549	1.28153
1	3385183	3385394	vir1_vs_VIRc	1.46208	-	40.0924	2.69576	1.76167
1	3385467	3385541	vir1_vs_VIRc	1.74739	-	33.3011	1.94065	1.25031
1	3385952	3386068	vir1_vs_VIRc	2.22856	-	35.0556	3.00293	1.96334
1	3386481	3386671	vir1_vs_VIRc	2.27691	-	15.4271	2.74749	1.79649
1	3387238	3387389	vir1_vs_VIRc	1.2733	-	30.1173	1.67993	1.07315
1	3389689	3389822	vir1_vs_VIRc	1.66315	+	8.51555	1.83088	1.13505
1	3400618	3401037	vir1_vs_VIRc	1.18819	+	57.9141	3.28914	1.99528
1	3408697	3408813	vir1_vs_VIRc	1.25128	-	159.917	2.43002	1.58667
1	3409033	3409208	vir1_vs_VIRc	1.29976	-	150.021	2.52581	1.64899
1	3409246	3409349	vir1_vs_VIRc	1.18153	-	124.478	1.6177	1.03026
1	3409426	3409513	vir1_vs_VIRc	1.23243	-	173.638	1.93684	1.24773
1	3409691	3410327	vir1_vs_VIRc	1.70138	-	166.879	5.58989	3.72096
1	3410425	3410653	vir1_vs_VIRc	1.80218	-	109.944	4.95307	3.3408
1	3410762	3411415	vir1_vs_VIRc	1.66611	-	124.388	5.58989	3.72096
1	3411596	3411889	vir1_vs_VIRc	1.86297	-	114.151	4.47595	2.9942
1	3412027	3412103	vir1_vs_VIRc	2.6004	-	65.0108	3.14533	2.06331
1	3412493	3412835	vir1_vs_VIRc	2.35248	-	51.2077	5.22191	3.55501
1	3418216	3418362	vir1_vs_VIRc	1.33974	-	98.0391	2.3339	1.52243
1	3419078	3419274	vir1_vs_VIRc	1.21298	-	121.895	2.45582	1.60153
1	3428485	3428677	vir1_vs_VIRc	-1.06864	-	59.3851	2.36243	1.54072
1	3431798	3432092	vir1_vs_VIRc	2.10343	+	26.5853	3.44647	2.09766
1	3432276	3432386	vir1_vs_VIRc	1.81302	+	53.1149	1.87187	1.16221
1	3432541	3432663	vir1_vs_VIRc	1.85403	+	44.4499	1.94264	1.20588
1	3432779	3432959	vir1_vs_VIRc	1.92091	+	39.2228	2.76903	1.68721
1	3433047	3433145	vir1_vs_VIRc	1.63292	+	31.2197	1.83082	1.13505
1	3433260	3433403	vir1_vs_VIRc	1.73288	+	44.0422	2.24259	1.3895
1	3433947	3434170	vir1_vs_VIRc	1.48287	+	38.3683	2.84217	1.73054
1	3434892	3435146	vir1_vs_VIRc	1.27793	+	49.5951	2.86641	1.74316
1	3435368	3435867	vir1_vs_VIRc	1.28637	+	56.1347	3.28558	1.99387
1	3436155	3436356	vir1_vs_VIRc	1.09141	+	75.9237	2.83209	1.72544
1	3454113	3454284	vir1_vs_VIRc	1.42848	+	29.204	2.14294	1.32433
1	3454414	3454488	vir1_vs_VIRc	1.46862	+	26.9089	1.66514	1.02982
1	3454568	3454662	vir1_vs_VIRc	1.4551	+	28.7623	1.68866	1.045
1	3454854	3454964	vir1_vs_VIRc	1.4576	+	37.9602	1.95784	1.21509
1	3461650	3461818	vir1_vs_VIRc	1.1073	+	87.2722	2.25593	1.39651
1	3466760	3466849	vir1_vs_VIRc	3.53231	+	7.90278	1.96539	1.21923
1	3468125	3468198	vir1_vs_VIRc	2.12465	+	10.5529	1.87605	1.16493
1	3472349	3472481	vir1_vs_VIRc	3.2864	-	4.51566	1.95774	1.26225
1	3472512	3472640	vir1_vs_VIRc	4.76293	-	2.89147	1.64006	1.04555
1	3487608	3487794	vir1_vs_VIRc	1.26039	+	60.5263	2.16102	1.33599
1	3493724	3493877	vir1_vs_VIRc	3.21397	-	4.60552	2.74129	1.79293
1	3493882	3494204	vir1_vs_VIRc	1.98941	-	25.6989	3.33062	2.19315
1	3494296	3494613	vir1_vs_VIRc	2.36997	-	46.9586	4.2541	2.82228
1	3494967	3495101	vir1_vs_VIRc	2.37922	+	11.4364	2.39335	1.47459
1	3494967	3495118	vir1_vs_VIRc	2.81212	-	61.8936	3.65037	2.4127
1	3503197	3503341	vir1_vs_VIRc	2.94316	-	5.68908	2.50938	1.63857
1	3505539	3505610	vir1_vs_VIRc	2.30928	+	8.84491	1.75361	1.08608
1	3505790	3506354	vir1_vs_VIRc	1.85325	+	24.5034	4.16375	2.50783
1	3506417	3506835	vir1_vs_VIRc	2.0886	+	21.8085	3.08401	1.8676
1	3506933	3507229	vir1_vs_VIRc	1.94015	+	50.8162	3.78077	2.30461
1	3507309	3507372	vir1_vs_VIRc	1.56924	+	62.1003	1.8581	1.15241
1	3507450	3507518	vir1_vs_VIRc	1.58143	+	65.0785	1.95643	1.21405
1	3507599	3508033	vir1_vs_VIRc	1.41223	+	98.286	3.49237	2.11799
1	3508137	3508287	vir1_vs_VIRc	1.05343	+	103.698	1.88729	1.17151
1	3508470	3508592	vir1_vs_VIRc	3.87918	-	4.96138	2.73316	1.78767
1	3516698	3516771	vir1_vs_VIRc	1.21496	-	71.4313	1.85427	1.19237
1	3516848	3516980	vir1_vs_VIRc	1.62107	-	86.9066	3.35185	2.20282
1	3517399	3517879	vir1_vs_VIRc	1.40151	-	84.2885	4.52294	3.01251
1	3525210	3525334	vir1_vs_VIRc	1.0188	-	90.0507	2.10792	1.36354
1	3530561	3530729	vir1_vs_VIRc	1.28151	+	88.9236	1.84214	1.14147
1	3530822	3530954	vir1_vs_VIRc	1.33418	+	103.614	2.42951	1.49268
1	3531265	3531343	vir1_vs_VIRc	1.05401	+	115.608	1.96913	1.22114
1	3537516	3537617	vir1_vs_VIRc	2.16482	-	16.9003	2.56445	1.67423
1	3556389	3556536	vir1_vs_VIRc	-1.2265	+	26.5563	1.79933	1.11558
1	3563402	3563477	vir1_vs_VIRc	inf	-	2.81689	1.74548	1.11848
1	3565288	3565591	vir1_vs_VIRc	1.47974	+	26.7971	2.8162	1.71648
1	3566165	3566334	vir1_vs_VIRc	1.50949	+	26.2696	2.27415	1.40724
1	3570474	3570551	vir1_vs_VIRc	1.04612	-	69.0566	1.65219	1.05338
1	3582158	3582256	vir1_vs_VIRc	2.43242	+	6.88805	1.94312	1.20613
1	3584145	3584251	vir1_vs_VIRc	1.08325	-	217.296	1.78328	1.14351
1	3584348	3584524	vir1_vs_VIRc	1.06628	-	215.708	3.45317	2.27607
1	3584752	3584836	vir1_vs_VIRc	1.1591	-	247.77	2.12605	1.37624
1	3585228	3585287	vir1_vs_VIRc	1.28801	-	262.264	1.74618	1.11901
1	3585382	3585444	vir1_vs_VIRc	1.34223	-	212.509	1.8572	1.19421
1	3585522	3585585	vir1_vs_VIRc	1.44	-	162.632	1.8848	1.21402
1	3585724	3585909	vir1_vs_VIRc	1.50943	-	228.625	4.39491	2.93279
1	3585806	3585909	vir1_vs_VIRc	2.37276	+	8.03606	1.75747	1.08848
1	3585982	3586071	vir1_vs_VIRc	1.66304	-	273.945	3.6405	2.40646
1	3586343	3586506	vir1_vs_VIRc	1.60461	-	246.339	4.24094	2.82228
1	3586687	3586822	vir1_vs_VIRc	1.59939	-	309.626	3.54197	2.33868
1	3587072	3587160	vir1_vs_VIRc	1.71868	-	303.252	3.56322	2.3545
1	3587252	3587392	vir1_vs_VIRc	1.64825	-	216.406	3.0861	2.01946
1	3587489	3587585	vir1_vs_VIRc	2.02386	-	233.439	3.84953	2.55967
1	3587702	3587810	vir1_vs_VIRc	1.75346	-	221.09	3.01278	1.96901
1	3587915	3588310	vir1_vs_VIRc	1.8179	-	181.182	5.58989	3.72096
1	3588058	3588271	vir1_vs_VIRc	3.36324	+	4.34385	2.18267	1.3487
1	3588729	3588883	vir1_vs_VIRc	2.13055	-	131.929	4.39491	2.93279
1	3588983	3589074	vir1_vs_VIRc	2.03599	-	147.468	3.29986	2.17515
1	3589193	3589271	vir1_vs_VIRc	2.10202	-	169.396	3.53681	2.33532
1	3589365	3589465	vir1_vs_VIRc	2.39247	-	153.139	3.35185	2.20282
1	3589553	3589594	vir1_vs_VIRc	2.15929	-	151.687	2.1354	1.38361
1	3589798	3590076	vir1_vs_VIRc	2.06809	-	201.038	5.58989	3.72096
1	3590425	3590653	vir1_vs_VIRc	2.07767	-	44.4261	3.60913	2.38934
1	3599819	3599940	vir1_vs_VIRc	3.19903	-	3.60314	1.84183	1.18387
1	3600279	3600406	vir1_vs_VIRc	3.8206	-	4.5013	2.0317	1.31093
1	3604436	3604683	vir1_vs_VIRc	1.09638	-	68.2372	2.78168	1.81986
1	3604789	3604979	vir1_vs_VIRc	1.38265	-	70.3298	2.33777	1.52477
1	3605585	3605840	vir1_vs_VIRc	-1.04555	-	92.5511	4.19195	2.79066
1	3610099	3610173	vir1_vs_VIRc	4.83019	+	4.61333	1.64957	1.02015
1	3612059	3612496	vir1_vs_VIRc	1.49008	+	45.0788	3.24669	1.96553
1	3612508	3612844	vir1_vs_VIRc	1.32003	+	63.7527	3.03765	1.84268
1	3612862	3613177	vir1_vs_VIRc	1.03182	+	66.8175	3.69563	2.25512
1	3619911	3620030	vir1_vs_VIRc	1.31097	-	42.9937	1.84085	1.1834
1	3621147	3621249	vir1_vs_VIRc	1.63239	-	54.5574	2.14496	1.39053
1	3621332	3621379	vir1_vs_VIRc	1.52509	-	59.2882	1.6093	1.02462
1	3622920	3623020	vir1_vs_VIRc	1.72063	-	35.9719	1.93581	1.24712
1	3623362	3623438	vir1_vs_VIRc	2.22641	-	45.9232	2.28261	1.48651
1	3623565	3623739	vir1_vs_VIRc	2.38099	-	40.5148	4.39491	2.93279
1	3627701	3627808	vir1_vs_VIRc	1.08753	+	78.0455	1.6744	1.03575
1	3628604	3628739	vir1_vs_VIRc	3.09933	-	5.51225	1.71678	1.09902
1	3633525	3633670	vir1_vs_VIRc	2.47528	+	6.16381	1.94619	1.20801
1	3635426	3636321	vir1_vs_VIRc	1.07332	-	133.395	5.36804	3.55501
1	3636406	3636514	vir1_vs_VIRc	1.33336	-	115.336	3.4448	2.26981
1	3637023	3637124	vir1_vs_VIRc	1.1838	-	124.019	1.8008	1.15503
1	3639915	3640179	vir1_vs_VIRc	1.17827	+	113.911	2.3691	1.46194
1	3640547	3640631	vir1_vs_VIRc	1.2498	+	101.495	2.47822	1.51645
1	3640743	3641003	vir1_vs_VIRc	1.18643	+	109.274	3.35238	2.04185
1	3641365	3641543	vir1_vs_VIRc	1.04066	+	104.755	2.52626	1.54704
1	3642079	3642183	vir1_vs_VIRc	1.1753	+	133.638	2.24661	1.39187
1	3642380	3642479	vir1_vs_VIRc	1.03765	+	160.06	1.92509	1.19526
1	3642785	3642874	vir1_vs_VIRc	1.01045	+	171.416	1.71524	1.06193
1	3643973	3644146	vir1_vs_VIRc	-1.42136	+	20.6715	2.21421	1.36979
1	3646693	3646798	vir1_vs_VIRc	1.06975	-	46.7759	1.60721	1.02337
1	3647547	3647650	vir1_vs_VIRc	2.12239	-	4.19151	1.73467	1.1113
1	3649802	3649960	vir1_vs_VIRc	1.09494	-	29.0807	2.3155	1.51056
1	3652351	3652492	vir1_vs_VIRc	1.98258	-	19.189	1.81608	1.16567
1	3652498	3652675	vir1_vs_VIRc	1.74657	-	23.1381	3.09713	2.02752
1	3652949	3653079	vir1_vs_VIRc	1.85737	-	22.0967	2.95074	1.93061
1	3653168	3653341	vir1_vs_VIRc	1.85922	-	17.7677	2.19866	1.4267
1	3653562	3653796	vir1_vs_VIRc	2.15863	-	15.8812	3.56322	2.3545
1	3653863	3653975	vir1_vs_VIRc	2.04704	-	18.7588	1.61484	1.02843
1	3654718	3654876	vir1_vs_VIRc	1.77713	-	16.0692	1.9519	1.25816
1	3659215	3659411	vir1_vs_VIRc	1.61488	+	241.656	3.44391	2.09766
1	3660323	3660517	vir1_vs_VIRc	1.38325	+	301.054	3.39574	2.0667
1	3660622	3660726	vir1_vs_VIRc	1.07396	+	385.948	1.9115	1.18742
1	3661161	3661259	vir1_vs_VIRc	1.14391	+	446.358	1.97967	1.22716
1	3664385	3664870	vir1_vs_VIRc	1.0106	+	3689.16	4.3856	2.65457
1	3664641	3664978	vir1_vs_VIRc	2.09496	-	17.3425	3.239	2.12777
1	3666240	3666440	vir1_vs_VIRc	1.50766	-	16.5133	2.53797	1.65817
1	3670695	3671123	vir1_vs_VIRc	2.15015	-	15.303	3.60913	2.38934
1	3681835	3682042	vir1_vs_VIRc	1.62928	+	74.5669	2.20076	1.36131
1	3684727	3684897	vir1_vs_VIRc	1.51063	+	44.5507	2.42828	1.49268
1	3685921	3686130	vir1_vs_VIRc	1.22749	+	24.7317	2.38705	1.47155
1	3686457	3686579	vir1_vs_VIRc	1.43695	+	27.7785	1.65401	1.02295
1	3687294	3687387	vir1_vs_VIRc	1.47509	+	33.2225	1.67648	1.03701
1	3690779	3690858	vir1_vs_VIRc	1.51155	-	12.6687	1.63249	1.03995
1	3691288	3691390	vir1_vs_VIRc	1.81854	-	10.8236	1.91955	1.23721
1	3691462	3691533	vir1_vs_VIRc	1.5657	-	10.7118	1.58193	1.0062
1	3691644	3692001	vir1_vs_VIRc	2.2261	-	11.2265	3.66389	2.42108
1	3692186	3692419	vir1_vs_VIRc	2.85109	-	11.0271	3.126	2.04703
1	3693196	3693510	vir1_vs_VIRc	1.95721	-	12.023	2.97254	1.94602
1	3694716	3695063	vir1_vs_VIRc	-1.11517	-	40.699	3.33382	2.19441
1	3705492	3705596	vir1_vs_VIRc	1.98112	-	3.92698	2.33486	1.52313
1	3707397	3707461	vir1_vs_VIRc	3.30101	-	5.4141	1.84137	1.18359
1	3708115	3708226	vir1_vs_VIRc	3.54566	-	4.06548	1.7169	1.09902
1	3708295	3708415	vir1_vs_VIRc	3.42501	-	3.67906	2.584	1.68799
1	3708709	3708806	vir1_vs_VIRc	3.87416	-	4.23554	3.2521	2.13851
1	3708978	3709055	vir1_vs_VIRc	7.84627	-	3.95085	2.11475	1.36833
1	3722887	3723225	vir1_vs_VIRc	2.23688	+	26.2134	3.52488	2.13772
1	3723603	3723732	vir1_vs_VIRc	2.32597	+	44.2801	2.94607	1.78297
1	3723830	3723901	vir1_vs_VIRc	1.69852	+	52.5845	1.99065	1.2338
1	3724067	3724132	vir1_vs_VIRc	1.88093	+	53.1995	1.99065	1.2338
1	3724224	3724295	vir1_vs_VIRc	2.55175	+	49.3947	2.06312	1.27579
1	3724676	3724741	vir1_vs_VIRc	2.00057	+	44.149	1.92033	1.19233
1	3724839	3724904	vir1_vs_VIRc	2.15213	+	45.9785	2.3343	1.44239
1	3724988	3725279	vir1_vs_VIRc	1.55105	+	55.7623	2.79169	1.70223
1	3725284	3725481	vir1_vs_VIRc	1.2917	+	59.4853	2.63326	1.61192
1	3725578	3725743	vir1_vs_VIRc	1.322	+	49.9523	2.33509	1.44239
1	3734427	3734532	vir1_vs_VIRc	3.67854	+	3.65723	1.74177	1.07803
1	3734739	3734817	vir1_vs_VIRc	4.2332	+	4.76371	2.43948	1.49807
1	3736582	3736715	vir1_vs_VIRc	3.81147	+	3.74129	1.77864	1.10155
1	3737719	3737904	vir1_vs_VIRc	2.96277	+	3.94489	2.21286	1.36873
1	3743270	3743335	vir1_vs_VIRc	1.99146	+	13.8359	1.95091	1.21041
1	3755695	3755889	vir1_vs_VIRc	-1.02618	-	20.6893	2.51691	1.64316
1	3777341	3777592	vir1_vs_VIRc	-1.03501	+	1398.39	3.05916	1.8547
1	3777899	3778223	vir1_vs_VIRc	-1.08451	+	1230.72	4.06818	2.46381
1	3778929	3780333	vir1_vs_VIRc	-1.63881	+	1756.24	5.97666	3.84278
1	3779970	3780205	vir1_vs_VIRc	-1.40878	-	23.6448	2.78712	1.82192
1	3790073	3790270	vir1_vs_VIRc	1.35797	-	49.7264	3.41091	2.24158
1	3790464	3790784	vir1_vs_VIRc	1.60075	-	25.1215	2.60059	1.69506
1	3791937	3792103	vir1_vs_VIRc	1.54525	-	17.7899	2.52481	1.64831
1	3793016	3793208	vir1_vs_VIRc	1.78039	-	19.899	2.64197	1.72333
1	3793505	3793857	vir1_vs_VIRc	2.05489	-	12.3949	3.54718	2.34255
1	3794387	3794565	vir1_vs_VIRc	4.09176	+	4.47067	2.49052	1.52373
1	3794770	3795036	vir1_vs_VIRc	2.49651	+	10.4126	2.80611	1.70921
1	3795128	3795543	vir1_vs_VIRc	2.05456	+	10.7482	3.0143	1.82675
1	3796511	3796720	vir1_vs_VIRc	1.73995	+	11.9718	2.37125	1.4631
1	3797852	3797992	vir1_vs_VIRc	1.7853	+	5.81619	1.71197	1.06013
1	3800690	3800823	vir1_vs_VIRc	-1.04808	+	16.4378	1.72146	1.06563
1	3802523	3802686	vir1_vs_VIRc	2.51552	+	8.32927	2.01359	1.2468
1	3803748	3803999	vir1_vs_VIRc	1.23819	-	144.02	2.59236	1.69044
1	3810339	3810526	vir1_vs_VIRc	1.79386	+	7.35062	1.9247	1.19517
1	3811240	3811515	vir1_vs_VIRc	2.11052	-	8.54136	2.93764	1.92119
1	3812269	3812725	vir1_vs_VIRc	2.63085	-	10.4984	3.62141	2.39527
1	3816731	3816874	vir1_vs_VIRc	3.85954	-	6.5816	2.23649	1.4538
1	3820171	3820378	vir1_vs_VIRc	1.49359	-	58.5272	2.1882	1.42029
1	3820529	3820768	vir1_vs_VIRc	1.46289	-	35.4556	2.46246	1.60656
1	3833564	3833674	vir1_vs_VIRc	-1.26885	+	52.3971	2.52811	1.5485
1	3833765	3834210	vir1_vs_VIRc	-1.19376	+	97.3339	5.97666	3.84278
1	3836100	3836264	vir1_vs_VIRc	1.16932	-	44.6894	2.19028	1.4217
1	3836359	3836670	vir1_vs_VIRc	1.3816	-	45.5705	3.49999	2.30933
1	3837298	3837418	vir1_vs_VIRc	1.29656	-	42.5888	2.25968	1.46962
1	3841388	3841661	vir1_vs_VIRc	1.3987	+	40.5262	2.54194	1.55603
1	3841929	3842562	vir1_vs_VIRc	1.11438	+	79.8578	3.65652	2.22383
1	3842872	3843098	vir1_vs_VIRc	1.00065	+	66.4372	2.28744	1.41297
1	3846488	3846616	vir1_vs_VIRc	2.09045	-	10.0149	1.76138	1.12844
1	3846755	3846901	vir1_vs_VIRc	2.56646	-	8.26587	2.2519	1.46414
1	3849328	3849430	vir1_vs_VIRc	1.12504	+	44.432	2.11663	1.30752
1	3865705	3866136	vir1_vs_VIRc	1.02181	-	191.49	3.56051	2.3527
1	3888670	3889446	vir1_vs_VIRc	1.29367	+	170.794	5.49954	3.44049
1	3889601	3889743	vir1_vs_VIRc	1.02525	+	133.755	2.1504	1.3298
1	3896522	3896916	vir1_vs_VIRc	1.32176	-	64.8975	4.02169	2.67844
1	3902031	3902861	vir1_vs_VIRc	1.33517	+	74.4294	4.15059	2.50783
1	3913921	3914116	vir1_vs_VIRc	1.06298	-	35.8231	2.34627	1.5305
1	3914181	3914424	vir1_vs_VIRc	1.06701	-	37.3757	2.85243	1.85974
1	3915428	3915537	vir1_vs_VIRc	3.654	-	3.5	2.20757	1.43233
1	3921002	3921960	vir1_vs_VIRc	1.53675	+	81.6596	5.13157	3.2025
1	3922019	3922228	vir1_vs_VIRc	1.15321	+	108.928	3.09987	1.87826
1	3922382	3922594	vir1_vs_VIRc	1.45255	+	97.5618	3.08069	1.8674
1	3922732	3922827	vir1_vs_VIRc	1.35415	+	74.8802	2.08933	1.29124
1	3929142	3929284	vir1_vs_VIRc	1.10601	-	70.7162	1.85984	1.196
1	3930305	3930445	vir1_vs_VIRc	1.02689	-	66.8978	1.61752	1.03015
1	3930575	3930724	vir1_vs_VIRc	1.1431	-	56.8894	1.95977	1.26372
1	3931168	3931345	vir1_vs_VIRc	1.1511	-	47.53	2.21704	1.4391
1	3939626	3939777	vir1_vs_VIRc	2.88335	-	7.98355	2.06085	1.33135
1	3945751	3946342	vir1_vs_VIRc	1.02855	+	271.089	4.45815	2.68825
1	3946424	3946579	vir1_vs_VIRc	1.05921	+	143.582	1.81163	1.1222
1	3949738	3949936	vir1_vs_VIRc	1.3125	+	13.6679	2.21813	1.37238
1	3950464	3950569	vir1_vs_VIRc	1.43229	+	14.1698	1.63131	1.00925
1	3951421	3951713	vir1_vs_VIRc	1.50509	+	84.7489	3.11156	1.88193
1	3952485	3953231	vir1_vs_VIRc	1.25428	+	106.264	3.94728	2.40462
1	3953236	3953514	vir1_vs_VIRc	1.1766	+	92.6544	2.34817	1.449
1	3954079	3954353	vir1_vs_VIRc	1.37992	+	150.711	3.34828	2.03886
1	3954436	3954611	vir1_vs_VIRc	1.1868	+	109.559	2.65923	1.62433
1	3954938	3954995	vir1_vs_VIRc	3.13397	-	4.56609	1.63753	1.04345
1	3955094	3955167	vir1_vs_VIRc	3.08627	-	4.57545	1.8026	1.15632
1	3955307	3955477	vir1_vs_VIRc	1.12176	+	119.613	2.12682	1.31427
1	3971760	3971841	vir1_vs_VIRc	1.64775	-	9.82114	1.73516	1.11161
1	3978846	3978991	vir1_vs_VIRc	1.09786	-	46.645	2.08109	1.34446
1	3985353	3985462	vir1_vs_VIRc	-1.00935	-	21.5864	1.987	1.28248
1	3993258	3993479	vir1_vs_VIRc	1.10154	-	180.088	2.78803	1.82192
1	3997034	3997141	vir1_vs_VIRc	1.02224	-	51.2616	2.04711	1.32169
1	4001231	4001518	vir1_vs_VIRc	1.05319	+	394.246	3.10451	1.87826
1	4001811	4001958	vir1_vs_VIRc	2.30141	-	13.4747	2.34561	1.53012
1	4002362	4002456	vir1_vs_VIRc	1.6044	+	31.9711	1.65451	1.02327
1	4002457	4002561	vir1_vs_VIRc	1.48788	-	16.0706	1.72619	1.1053
1	4002576	4002697	vir1_vs_VIRc	1.44452	+	19.2848	1.86584	1.15758
1	4002830	4002974	vir1_vs_VIRc	1.26381	-	33.6454	1.81711	1.16645
1	4003860	4004099	vir1_vs_VIRc	1.35561	+	83.9247	2.98323	1.80892
1	4004991	4005071	vir1_vs_VIRc	1.05125	+	59.8282	1.66438	1.02952
1	4010128	4010251	vir1_vs_VIRc	1.20534	-	15.5343	1.77416	1.13739
1	4017686	4017842	vir1_vs_VIRc	1.98204	+	37.3259	1.83393	1.13688
1	4018905	4018994	vir1_vs_VIRc	3.95486	+	8.58981	1.67146	1.03453
1	4042924	4043219	vir1_vs_VIRc	2.15385	-	15.8026	2.32452	1.51679
1	4052916	4053037	vir1_vs_VIRc	1.15854	-	131.786	1.61801	1.03043
1	4070350	4070446	vir1_vs_VIRc	4.8246	+	2.46993	1.66114	1.02762
1	4071182	4071331	vir1_vs_VIRc	2.86172	+	4.15278	2.0377	1.26109
1	4071752	4071904	vir1_vs_VIRc	3.35675	+	4.56264	2.35935	1.45603
1	4076818	4076910	vir1_vs_VIRc	1.32841	-	11.3109	1.59459	1.01545
1	4084487	4084640	vir1_vs_VIRc	1.30941	+	454.816	1.8809	1.16767
1	4105249	4105456	vir1_vs_VIRc	1.88425	+	190.969	2.91408	1.76278
1	4105641	4105818	vir1_vs_VIRc	1.8149	+	212.229	2.68154	1.63754
1	4105913	4105953	vir1_vs_VIRc	1.92764	+	184.888	1.64684	1.01898
1	4106127	4106715	vir1_vs_VIRc	1.66441	+	228.364	5.97666	3.84278
1	4108426	4109365	vir1_vs_VIRc	1.21776	+	321.779	5.97666	3.84278
1	4108460	4108620	vir1_vs_VIRc	3.20317	-	7.53054	2.95946	1.93608
1	4109254	4109422	vir1_vs_VIRc	1.77836	-	11.9694	2.0716	1.33848
1	4137542	4138043	vir1_vs_VIRc	1.51605	+	102.515	3.84633	2.34465
1	4138079	4138188	vir1_vs_VIRc	1.31637	+	89.3409	1.82995	1.13432
1	4138416	4138486	vir1_vs_VIRc	1.25608	+	126.646	1.70267	1.0543
1	4138603	4138755	vir1_vs_VIRc	1.24571	+	142.469	2.12804	1.3144
1	4139058	4139196	vir1_vs_VIRc	1.18839	+	159.622	2.26259	1.39957
1	4139339	4139467	vir1_vs_VIRc	1.05024	+	156.366	2.17028	1.3414
1	4141021	4141370	vir1_vs_VIRc	2.39804	+	7.13833	2.71827	1.65576
1	4141485	4142581	vir1_vs_VIRc	2.02089	+	13.3229	5.49954	3.44049
1	4142978	4143146	vir1_vs_VIRc	1.86564	+	16.2756	2.21421	1.36979
1	4143208	4143458	vir1_vs_VIRc	2.02854	+	15.1335	3.1248	1.89214
1	4146009	4146150	vir1_vs_VIRc	1.47608	+	26.0827	1.65513	1.0236
1	4147959	4148103	vir1_vs_VIRc	1.31446	+	179.573	2.26901	1.4029
1	4148194	4148335	vir1_vs_VIRc	1.19422	+	701.638	2.69631	1.64546
1	4148739	4148817	vir1_vs_VIRc	1.04852	+	434.223	2.25296	1.39499
1	4149080	4149155	vir1_vs_VIRc	1.19944	+	365.273	2.71588	1.65463
1	4149250	4149333	vir1_vs_VIRc	1.17677	+	367.896	3.35238	2.04185
1	4149427	4149531	vir1_vs_VIRc	1.1256	+	464.37	3.25485	1.97003
1	4149621	4149701	vir1_vs_VIRc	1.02111	+	500.083	2.20648	1.36434
1	4156563	4157674	vir1_vs_VIRc	-1.43762	+	1280.94	5.97666	3.84278
1	4175991	4176146	vir1_vs_VIRc	1.34675	-	27.4594	1.78559	1.1449
1	4176416	4177025	vir1_vs_VIRc	1.64542	-	21.7225	3.76382	2.4925
1	4177398	4177585	vir1_vs_VIRc	1.32922	-	19.0488	2.47163	1.61202
1	4179458	4179724	vir1_vs_VIRc	1.95639	-	10.7946	2.32863	1.51944
1	4179800	4179926	vir1_vs_VIRc	1.72503	-	8.0269	1.67034	1.06607
1	4180151	4180330	vir1_vs_VIRc	2.39828	-	9.01852	2.09209	1.35206
1	4180536	4180656	vir1_vs_VIRc	2.18826	-	8.3478	1.75783	1.12625
1	4181025	4181177	vir1_vs_VIRc	2.63754	-	6.23529	2.30924	1.506
1	4185785	4186091	vir1_vs_VIRc	2.21111	-	7.28393	3.12699	2.04735
1	4187427	4187660	vir1_vs_VIRc	2.87135	+	4.80449	2.19441	1.3567
1	4195105	4195311	vir1_vs_VIRc	1.42919	+	72.7114	2.35043	1.45058
1	4196236	4196306	vir1_vs_VIRc	4.48841	+	3.08216	1.63497	1.01168
1	4216783	4216931	vir1_vs_VIRc	1.86253	-	14.8507	1.68707	1.07806
1	4227418	4227531	vir1_vs_VIRc	1.41802	-	15.5746	1.87637	1.20746
1	4236393	4236548	vir1_vs_VIRc	1.13808	-	50.9012	1.88548	1.21451
1	4236871	4237013	vir1_vs_VIRc	1.32572	-	55.8846	1.72339	1.10367
1	4237153	4237306	vir1_vs_VIRc	1.50973	-	51.684	2.31412	1.50963
1	4237386	4237472	vir1_vs_VIRc	1.25054	-	48.7184	1.97707	1.27582
1	4237564	4237793	vir1_vs_VIRc	1.34359	-	45.5072	2.71041	1.77133
1	4238097	4238197	vir1_vs_VIRc	1.58178	-	36.382	1.61524	1.02861
1	4238430	4238754	vir1_vs_VIRc	1.63336	-	31.5703	3.91779	2.60249
1	4242158	4242359	vir1_vs_VIRc	1.63569	+	41.7921	2.01264	1.24624
1	4247689	4247892	vir1_vs_VIRc	1.29154	+	37.9183	2.19455	1.3567
1	4248056	4248262	vir1_vs_VIRc	1.17909	+	54.7617	2.84601	1.73054
1	4250412	4250617	vir1_vs_VIRc	-1.45588	+	32.6549	2.66048	1.6244
1	4250999	4251086	vir1_vs_VIRc	1.66011	+	23.9223	2.45592	1.50646
1	4251336	4251521	vir1_vs_VIRc	2.08703	+	53.1129	3.73862	2.2781
1	4251640	4251852	vir1_vs_VIRc	1.84284	+	52.3772	2.93017	1.77499
1	4251947	4252086	vir1_vs_VIRc	1.77103	+	58.5036	1.94376	1.20641
1	4252177	4252272	vir1_vs_VIRc	1.41444	+	63.6415	2.27587	1.40747
1	4252783	4252884	vir1_vs_VIRc	1.24432	+	59.7018	1.91344	1.18864
1	4253257	4253400	vir1_vs_VIRc	1.3424	+	53.6395	2.51024	1.53747
1	4253907	4253966	vir1_vs_VIRc	1.15756	+	76.9736	1.67155	1.03456
1	4254718	4254796	vir1_vs_VIRc	1.51574	+	87.827	1.75486	1.08677
1	4255060	4255190	vir1_vs_VIRc	1.08677	+	73.958	2.06471	1.27653
1	4257890	4257987	vir1_vs_VIRc	1.61851	-	12.3605	1.68983	1.07986
1	4258222	4258372	vir1_vs_VIRc	1.62905	-	14.0977	1.73334	1.1105
1	4258496	4258667	vir1_vs_VIRc	2.22541	-	15.2829	3.40143	2.23829
1	4258810	4258986	vir1_vs_VIRc	2.21769	-	11.6276	2.42425	1.58354
1	4268997	4269219	vir1_vs_VIRc	-1.37843	-	61.8554	3.38849	2.22964
1	4275731	4275941	vir1_vs_VIRc	-1.30227	+	16.1015	1.95942	1.21539
1	4295668	4295905	vir1_vs_VIRc	1.56258	-	22.7773	2.13764	1.38497
1	4322778	4322926	vir1_vs_VIRc	1.1272	-	52.9334	2.07636	1.34149
1	4323754	4323865	vir1_vs_VIRc	-1.00039	-	16.3534	1.81506	1.16493
1	4325067	4325204	vir1_vs_VIRc	1.5269	-	8.49698	2.15198	1.39539
1	4325730	4325819	vir1_vs_VIRc	1.14167	-	11.0056	1.68631	1.0776
1	4347424	4347537	vir1_vs_VIRc	1.10621	-	55.6118	1.59927	1.01807
1	4353902	4354084	vir1_vs_VIRc	1.50269	+	10.3192	2.01236	1.24613
1	4355966	4356213	vir1_vs_VIRc	-1.39563	-	726.873	6.06701	3.9243
1	4356291	4356398	vir1_vs_VIRc	-1.3831	-	1102.81	4.95307	3.3408
1	4356407	4356573	vir1_vs_VIRc	-1.34786	-	633.072	4.37682	2.92637
1	4356575	4356945	vir1_vs_VIRc	-1.13175	-	739.008	6.06701	3.9243
1	4363915	4364851	vir1_vs_VIRc	1.10175	-	506.419	6.06701	3.9243
1	4364146	4364357	vir1_vs_VIRc	1.59549	+	20.8703	2.91408	1.76278
1	4364944	4365339	vir1_vs_VIRc	1.39028	-	408.947	4.95307	3.3408
1	4365149	4365306	vir1_vs_VIRc	2.19188	+	31.3434	2.54514	1.55778
1	4371083	4371222	vir1_vs_VIRc	1.17383	-	117.627	1.89228	1.21891
1	4380102	4380288	vir1_vs_VIRc	2.67249	+	11.8846	2.0381	1.26109
1	4381005	4381598	vir1_vs_VIRc	1.13839	-	122.614	5.02562	3.4052
1	4384450	4384770	vir1_vs_VIRc	1.11853	+	101.078	2.25002	1.39362
1	4390864	4391115	vir1_vs_VIRc	-1.25914	+	67.9593	2.79683	1.70602
1	4392969	4393089	vir1_vs_VIRc	2.16763	+	6.0792	1.87187	1.16221
1	4393546	4393838	vir1_vs_VIRc	1.56617	+	104.101	3.87286	2.36232
1	4397254	4397368	vir1_vs_VIRc	2.49329	+	6.3087	2.38084	1.46736
1	4401304	4401439	vir1_vs_VIRc	1.33486	-	37.0251	1.99296	1.28601
1	4403083	4403206	vir1_vs_VIRc	1.55491	-	48.748	2.20114	1.42816
1	4403968	4404096	vir1_vs_VIRc	1.52242	-	37.2888	2.76663	1.81108
1	4405107	4405205	vir1_vs_VIRc	2.04251	-	35.484	2.12416	1.37482
1	4405292	4405500	vir1_vs_VIRc	1.17861	-	64.6236	2.36278	1.54072
1	4419855	4420214	vir1_vs_VIRc	3.70706	+	6.53519	3.16981	1.91835
1	4437817	4437900	vir1_vs_VIRc	1.18954	-	44.2321	1.5833	1.00727
1	4443226	4443431	vir1_vs_VIRc	1.03489	-	77.1133	2.57888	1.68421
1	4447081	4447253	vir1_vs_VIRc	1.40908	-	33.5703	1.90615	1.22799
1	4447589	4447943	vir1_vs_VIRc	2.25973	+	10.0873	2.90075	1.75616
1	4448078	4448385	vir1_vs_VIRc	2.47083	+	12.3206	4.09017	2.47806
1	4448604	4448879	vir1_vs_VIRc	1.93123	+	10.6087	2.37711	1.46697
1	4448967	4449111	vir1_vs_VIRc	2.40453	+	12.8063	1.87757	1.16602
1	4451380	4451471	vir1_vs_VIRc	1.04648	+	18.9955	1.79985	1.11584
1	4459181	4460108	vir1_vs_VIRc	1.27387	+	222.996	5.97666	3.84278
1	4467217	4467428	vir1_vs_VIRc	1.04195	+	282.572	1.97558	1.2243
1	4472493	4472656	vir1_vs_VIRc	1.40238	-	26.6717	2.5944	1.6908
1	4472774	4472885	vir1_vs_VIRc	1.57472	-	35.0037	1.63138	1.03929
1	4472931	4473199	vir1_vs_VIRc	1.65594	-	32.2432	3.36891	2.2141
1	4482460	4482803	vir1_vs_VIRc	2.52855	+	5.43823	2.85118	1.73351
1	4484598	4485038	vir1_vs_VIRc	1.58584	+	43.6207	4.06818	2.46381
1	4485168	4485335	vir1_vs_VIRc	1.41163	+	31.1677	2.44813	1.50061
1	4486430	4486525	vir1_vs_VIRc	1.27461	+	65.1632	2.09068	1.29216
1	4487062	4487163	vir1_vs_VIRc	1.45792	+	63.3979	1.62986	1.00821
1	4487518	4487851	vir1_vs_VIRc	1.05173	+	68.4895	2.87184	1.74532
1	4489996	4490076	vir1_vs_VIRc	1.43543	-	36.6842	1.64628	1.04922
1	4492354	4492479	vir1_vs_VIRc	2.26159	-	11.3413	1.7616	1.12853
1	4503267	4503537	vir1_vs_VIRc	1.51143	-	32.2746	2.60327	1.69649
1	4510054	4510186	vir1_vs_VIRc	1.835	-	52.9123	2.18329	1.4176
1	4510280	4510394	vir1_vs_VIRc	1.67161	-	41.9754	1.61937	1.03127
1	4510626	4510825	vir1_vs_VIRc	1.58025	-	47.7429	2.59294	1.69057
1	4510920	4511028	vir1_vs_VIRc	1.55059	-	50.5352	1.58524	1.0086
1	4511309	4511575	vir1_vs_VIRc	1.53304	-	52.1976	2.54863	1.66422
1	4511675	4511785	vir1_vs_VIRc	1.62358	-	49.2065	2.01675	1.30029
1	4511871	4512455	vir1_vs_VIRc	1.78578	-	32.9067	4.19195	2.79066
1	4512847	4513226	vir1_vs_VIRc	1.87265	-	29.2268	3.43862	2.26553
1	4513382	4513624	vir1_vs_VIRc	2.08663	-	36.6519	2.77809	1.81781
1	4513626	4513834	vir1_vs_VIRc	2.00554	-	27.3066	2.32092	1.51463
1	4515606	4515757	vir1_vs_VIRc	1.5858	+	27.773	1.96269	1.2176
1	4518784	4518952	vir1_vs_VIRc	1.14483	+	56.7835	2.27726	1.40773
1	4544971	4545137	vir1_vs_VIRc	1.20172	+	118.013	3.13593	1.89859
1	4566337	4566583	vir1_vs_VIRc	1.01206	-	186.918	2.68843	1.75723
1	4569829	4569997	vir1_vs_VIRc	1.21813	-	35.574	1.9709	1.27142
1	4570027	4570269	vir1_vs_VIRc	1.77147	-	43.5226	2.74459	1.7951
1	4570350	4570469	vir1_vs_VIRc	1.75194	-	37.0653	1.79468	1.15116
1	4570870	4571077	vir1_vs_VIRc	2.37461	-	26.6174	2.92871	1.91517
1	4576448	4576624	vir1_vs_VIRc	1.29448	-	70.1064	2.16517	1.40551
1	4577073	4577239	vir1_vs_VIRc	1.18458	+	18.0813	2.01217	1.24603
1	4577347	4577724	vir1_vs_VIRc	1.21131	+	38.7544	2.98147	1.80777
1	4602036	4602167	vir1_vs_VIRc	2.8008	+	6.34343	2.04607	1.26528
1	4604886	4605664	vir1_vs_VIRc	1.96726	+	25.3738	4.25239	2.57537
1	4608521	4608597	vir1_vs_VIRc	2.0396	+	36.2771	1.81169	1.1222
1	4608691	4608771	vir1_vs_VIRc	2.03794	+	34.501	2.1446	1.32545
1	4609860	4609975	vir1_vs_VIRc	1.53442	+	21.5467	1.72583	1.06833
1	4631917	4632183	vir1_vs_VIRc	3.00405	-	12.1483	3.02839	1.98086
1	4632244	4632392	vir1_vs_VIRc	2.26461	-	11.7696	2.23829	1.45491
1	4632402	4632700	vir1_vs_VIRc	2.98129	-	10.4863	3.30734	2.17982
1	4632904	4633210	vir1_vs_VIRc	3.70254	-	7.85423	3.91779	2.60249
1	4635919	4636133	vir1_vs_VIRc	-1.97271	+	7.99845	2.601	1.59261
1	4636166	4636379	vir1_vs_VIRc	-1.57762	+	9.2683	2.02257	1.25251
1	4636432	4636737	vir1_vs_VIRc	-1.85345	+	10.7538	3.01715	1.82876
1	4642066	4642361	vir1_vs_VIRc	2.23354	-	14.6425	4.03763	2.68306
1	4643500	4643637	vir1_vs_VIRc	1.13716	-	78.2482	1.75592	1.12536
1	4643806	4643930	vir1_vs_VIRc	1.13198	-	55.07	2.43506	1.58974
1	4651326	4651456	vir1_vs_VIRc	1.23712	-	23.1037	1.85688	1.19408
1	4662622	4662736	vir1_vs_VIRc	1.3081	-	43.0565	1.68142	1.07397
1	4662760	4663477	vir1_vs_VIRc	2.14518	-	142.837	5.22191	3.55501
1	4671748	4671900	vir1_vs_VIRc	3.97181	-	4.0817	1.79954	1.15407
1	4671956	4672049	vir1_vs_VIRc	3.69774	-	3.56826	2.00885	1.29569
1	4672814	4673037	vir1_vs_VIRc	3.79092	-	4.80357	2.83784	1.85216
1	4678009	4679298	vir1_vs_VIRc	1.2387	-	118.084	6.06701	3.9243
1	4679596	4679776	vir1_vs_VIRc	1.20766	-	103.118	2.69062	1.75834
1	4680458	4680928	vir1_vs_VIRc	-1.44859	-	399.122	6.06701	3.9243
1	4703696	4704090	vir1_vs_VIRc	1.63615	-	20.2133	3.12105	2.04428
1	4704210	4704359	vir1_vs_VIRc	1.60725	-	17.4256	1.79589	1.15174
1	4704405	4704654	vir1_vs_VIRc	1.93342	-	15.3713	2.74047	1.79286
1	4715896	4715976	vir1_vs_VIRc	1.06979	-	37.7315	1.61619	1.02918
1	4716928	4717134	vir1_vs_VIRc	1.4823	-	29.6719	2.55983	1.6713
1	4721689	4721905	vir1_vs_VIRc	1.52793	+	28.8952	2.18267	1.3487
1	4722842	4722925	vir1_vs_VIRc	1.09647	+	56.3214	2.16409	1.33728
1	4723018	4723100	vir1_vs_VIRc	1.26492	+	47.0733	1.91533	1.18936
1	4737685	4737899	vir1_vs_VIRc	-1.23078	+	70.0767	2.8815	1.74835
1	4739877	4740036	vir1_vs_VIRc	1.842	-	8.28177	2.32863	1.51944
[truncated: 34,628 more rows]
