# Supplementary material for: Nanopore direct RNA sequencing maps the complexity of Arabidopsis mRNA processing and m6A modification
Source: eLife. 2020 Jan 14;9:e49658. doi: 10.7554/eLife.49658 (PMC6959997; doi:10.7554/eLife.49658)
Supplement: Supplementary file 1. — Dataset statistics for all nanopore DRS sequencing runs conducted. Datasets are sorted by the date of the sequencing run. All data was collected using a MinION with R9.4 flow cell and SQK-RNA001 library kit. Increases in mapping and over-splitting rate that occur in samples collected after September 2018 are therefore likely to have resulted from changes in the MinKNOW software. Other variations in mapping rates are likely caused by differences in the amount of RNA loaded onto the flowcell. Depletion of degraded RNA during 5’ adapter RNA ligation, for example, results in smaller libraries for nanopore sequencing. This causes lower pore occupancy during sequencing and results in many reads with low median quality scores, which are actually noise signal from empty pores (Mojarro et al., 2018; Pontefract et al., 2018). Related to Figures 1–7. [file elife-49658-supp1.xlsx]

## Sheet: Supplementary file 1
Supplementary file 1. Properties of the nanopore DRS sequencing data. [Linked to Figures 1-7].
Dataset statistics for all nanopore DRS sequencing runs conducted. Datasets are sorted by the date of the sequencing run. All data was collected using a MinION with R9.4 flow cell and SQK-RNA001 library kit.
Increases in mapping and over-splitting rate that occur in samples collected after September 2018 are therefore likely to have resulted from changes in the MinKNOW software.
Other variations in mapping rates are likely caused by differences in the amount of RNA loaded onto the flowcell. Depletion of degraded RNA during 5’ adapter RNA ligation, for example, results in smaller libraries for nanopore sequencing.
This causes lower pore occupancy during sequencing and results in many reads with low median quality scores, which are actually noise signal from empty pores80,81.
Sequencing date	Genotype	Bio replicate	5′ Adapter ligation	Total reads basecalled	Reads mapped to ERCC spike-ins	Reads mapped to TAIR10	Reads mapped to other (MALAT1/mGFP)	Longest read mapped to ERCC spike-ins	Median length of reads mapped to ERCC spike-ins	Longest read mapped to TAIR10	Median length of reads mapped to TAIR10	Percentage mapped to TAIR10	Estimated over-splitting rate (%)
2017-12-14	MALAT1 m6A	NA	NA	821732	NA	NA	174212	NA	NA	NA	NA	NA	NA
2017-12-18	MALAT1 Cntrl	NA	NA	198431	NA	NA	48714	NA	NA	NA	NA	NA	NA
2018-02-01	Col-0	1	-	1647484	6756	1003137	NA	1905	481	12607	865	60.89	0.047
2018-02-27	vir-1	1	-	1431457	1074	1005664	NA	2304	492	12446	878	70.25	0.045
2018-03-01	VIRc	1	-	1393351	713	1101368	NA	1108	493	11994	873	79.04	0.111
2018-04-05	Col-0	2	-	966529	556	743684	NA	1099	492	11852	878	76.94	0.035
2018-04-11	Col-0	1	+	1365809	7005	345799	NA	1928	486	5663	737	25.32	0.047
2018-04-13	Col-0	2	-	1242616	701	930629	NA	1094	488	11434	858	74.89	0.04
2018-04-16	Col-0	3	-	1079578	907	757028	NA	1772	486	12744	840	70.12	0.019
2018-04-18	Col-0	4	-	1007278	525	765322	NA	1292	495	11542	840	75.98	0.019
2018-05-08	Col-0	2	+	2043751	11324	557949	NA	2308	507	5596	732	27.3	0.069
2018-05-17	IVT mGFP	NA	NA	1477150	NA	NA	1295975	NA	NA	NA	NA	NA	NA
2018-09-07	VIRc	2	-	1699123	1824	1538040	NA	2236	497	12015	871	90.52	0.809
2018-09-12	vir-1	2	-	858747	1094	812517	NA	1880	491	15040	846	94.62	0.959
2018-09-25	VIRc	4	-	1435808	2710	1318857	NA	1947	493	10836	832	91.85	1.6
2018-09-28	vir-1	3	-	1843192	865	1746153	NA	1134	480	15291	884	94.74	0.878
2018-10-03	vir-1	4	-	1355795	1436	1271511	NA	1128	487	11522	802	93.78	1.467
2018-10-19	VIRc	3	-	1678723	1548	1570040	NA	2127	500	11471	849	93.53	0.887
