# Supplementary material for: Nanopore direct RNA sequencing maps the complexity of Arabidopsis mRNA processing and m6A modification
Source: eLife. 2020 Jan 14;9:e49658. doi: 10.7554/eLife.49658 (PMC6959997; doi:10.7554/eLife.49658)
Supplement: Supplementary file 2. — Related to Figures 1–7. [file elife-49658-supp2.xlsx]

## Sheet: Supplementary file 2
Supplementary file 2. Alignment statistics for Illumina RNAseq dataset. [Linked to Figures 1-7].
A							B
Sample	Total Reads	Uniquely mapped	Multi-mapped	Discarded - too many multi-mappings	Discarded – alignment too short		Sample	Total Reads	Uniquely mapped	Multi-mapped	Discarded - too many multi-mappings	Discarded – alignment too short
Col0_1	108995016	80094100	4005360	21161	24874395		Col0_1	50615944	46650535	754261	23600	3187548
Col0_2	94681252	69998981	3936870	18801	20726600		Col0_2	27375113	25018347	502182	11569	1843015
Col0_3	120233914	90055198	5329618	23311	24825787		Col0_3	36752866	33701348	617474	15558	2418486
Col0_4	112037084	82392835	5085572	22006	24536671		Col0_4	40416427	37706046	528937	16752	2164692
Col0_5	130517439	99989722	8720620	25813	21781284		Col0_5	30311454	26774948	956692	11610	2568204
Col0_6	94251077	40918202	38534936	48441	14749498		Col0_6	52570161	48996121	689905	18478	2865657
Col0_7	124180445	92818434	5338217	25586	25998208		vir-1_1	20570466	18269999	437888	9055	1853524
hen2-2_1	124499746	94676996	3657187	36904	26128659		vir-1_2	15052172	14012661	259362	7687	772462
hen2-2_2	124001637	87302490	8932645	41880	27724622		vir-1_3	45311660	40601271	1152458	21059	3536872
hen2-2_3	123701123	87674931	4396011	35370	31594811		vir-1_4	24714846	22269313	742956	11068	1691509
hen2-2_4	114883313	93256770	3070380	46143	18510020		vir-1_5	21909612	19796306	430287	10076	1672943
hen2-2_5	106126397	21014038	74963744	8665	10139950		vir-1_6	62659584	57390731	967693	27502	4273658
hen2-2_6	108238753	79647654	6506151	40276	22044672		VIRc_1	31005770	28009566	559254	14089	2422861
hen2-2_7	104494719	78066350	2775296	28455	23624618		VIRc_2	23629927	21942172	315848	10516	1361391
							VIRc_3	22353880	20643384	301018	9812	1399666
							VIRc_4	25618067	23889501	347873	11851	1368842
							VIRc_5	26220470	23890346	378658	12485	1938981
							VIRc_6	22529646	20277860	675538	10212	1566036
