# Supplementary material for: Nanopore direct RNA sequencing maps the complexity of Arabidopsis mRNA processing and m6A modification
Source: eLife. 2020 Jan 14;9:e49658. doi: 10.7554/eLife.49658 (PMC6959997; doi:10.7554/eLife.49658)
Supplement: Supplementary file 3. — The number of reads with adapters were detected in two biological replicates (Tables A and B respectively) of Col-0 sequenced with and without adapter ligation protocol. Rules are applied cumulatively (i.e. row one shows reads that pass the first rule, row two shows read alignments that pass the first and second rules, etc.). The signal-to-noise ratio shows the number of positive examples detected using rules in the adapter-ligated dataset divided by the number of false positives from the dataset collected without adapters. Related to Figure 3. [file elife-49658-supp3.xlsx]

## Sheet: Supplementary file 3
Supplementary file 3. Adapter detection using BLASTN rules approach. [Linked to Figure 3].
The number of reads with adapters were detected in two biological replicates (Tables A and B respectively) of Col-0 sequenced with and without adapter ligation protocol.
Rules are applied cumulatively (i.e. row one shows reads that pass the first rule, row two shows read alignments that pass the first and second rules, etc.).
The signal-to-noise ratio shows the number of positive examples detected using rules in the adapter-ligated dataset divided by the number of false positives from the dataset collected without adapters.
A								B
Replicate 1	Adapter			No adapter		Signal-to-noise ratio		Replicate 2	Adapter			No adapter		Signal-to-noise ratio
	Fails	Passes		Fails	Passes				Fails	Passes		Fails	Passes
Match length > 10 nt	58078	211786		47548	11427	15.17		Match length > 10 nt	37631	342158		100791	12653	72.4
Log10 E value < 2	76926	192938		57874	1101	131.8		Log10 E value < 2	60605	319184		112781	663	895.9
Adapter matches directly after alignment	198296	71568		58936	39	545.4		Adapter matches directly after alignment	266812	112977		113429	15	3202
