# Supplementary material for: Nanopore direct RNA sequencing maps the complexity of Arabidopsis mRNA processing and m6A modification
Source: eLife. 2020 Jan 14;9:e49658. doi: 10.7554/eLife.49658 (PMC6959997; doi:10.7554/eLife.49658)
Supplement: Supplementary file 4. — Table showing the genes where we were able to detect degradation intermediates from miRNA cleavage events using nanopore DRS. Predictions in 5’UTRs and across splice junctions have been filtered to reduce false positives. Only predictions with support from nanoPARE data are shown. Related to Figure 3. [file elife-49658-supp4.xlsx]

## Sheet: Supplementary file 4
Supplementary file 4. Cleavage products are detectable at predicted miRNA target sites in nanopore DRS data. [Linked to Figure 3].
Table showing the genes where we were able to detect degradation intermediates from miRNA cleavage events using nanopore DRS.
Predictions in 5’UTRs and across splice junctions have been filtered to reduce false positives. Only predictions with support from nanoPARE data are shown.
Gene ID	Gene Name	miRNA Family	Log2 enrichment score	FDR
AT2G39675	TAS1C	miR173	5.88	7.73×10-3
AT1G77850	ARF17	miR160	4.95	2.69×10-4
AT2G45160	HAM1	miR170/miR171	4.91	4.76×10-3
AT2G28350	ARF10	miR160	4.81	4.89×10-4
AT3G60630	HAM2	miR170/miR171	4.75	4.80×10-3
AT4G30080	ARF16	miR160	3.81	9.72×10-4
AT2G39681	TAS2	miR173	3.58	7.73×10-3
AT2G27400	TAS1A	miR173	3.32	7.73×10-3
AT3G26810	AFB2	miR393	3.32	7.49×10-3
AT1G56010	NAC1	miR164	3.17	1.11×10-3
AT5G37020	ARF8	miR167	3.17	1.36×10-2
AT2G36400	GRF3	miR396	3.12	7.42×10-3
AT1G50055	TAS1B	miR173	3.09	2.72×10-2
AT1G12820	AFB3	miR393	3	7.87×10-3
AT4G37740	GRF2	miR396	3	7.42×10-3
AT1G48410	AGO1	miR168	2.58	3.21×10-2
AT1G69170	SPL6	miR156/miR157	2.32	8.17×10-3
AT4G00150	HAM3	miR170/miR171	2.32	1.62×10-2
AT5G50570	SPL13A	miR156/miR157	2.17	7.83×10-3
AT5G50670	SPL13B	miR156/miR157	2.17	7.83×10-3
