# Supplementary material for: Nanopore direct RNA sequencing maps the complexity of Arabidopsis mRNA processing and m6A modification
Source: eLife. 2020 Jan 14;9:e49658. doi: 10.7554/eLife.49658 (PMC6959997; doi:10.7554/eLife.49658)
Supplement: Supplementary file 5. — Numbers are shown for (A) the unique splice junction set intersections upset plot (Figure 4B) and (B) unique linked splicing events upset plot (Figure 4C). Shaded cells denote sets included in the intersection for that row, while unshaded cells denote sets excluded from the intersection. Rows are sorted by the size of the intersection for canonical splice junctions. Related to Figure 4. [file elife-49658-supp5.xlsx]

## Sheet: Supplementary file 5
Supplementary file 5. Splice junctions supported by nanopore DRS and Illumina RNAseq. [Linked to Figure 4].
Numbers are shown for (A) the unique splice junction set intersections upset plot (Figure 4B) and (B) unique linked splicing events upset plot (Figure 4C).
Shaded cells denote sets included in the intersection for that row, while unshaded cells denote sets excluded from the intersection.
Rows are sorted by the size of the intersection for canonical splice junctions.
A								B
AtRTD2	Araport11	Illumina	Nanopore EC	Nanopore	Canonical	Non-canonical		AtRTD2	Araport11	DRS EC	Isoforms
					99966	805					29894
					84630	79377					27585
					25769	57298					11967
					20893	404					8659
					10882	21484					3788
					7301	545					756
					6941	210					341
					6256	879
					4801	1894
					3939	160
					3665	31
					2844	59
					2424	28
					2006	18
					832	453
					828	5
					585	6
					512	6
					484	31
					390	53
					369	33
					326	2
					193	6
					148	8
					76	3
					47	4
					24	0
					21	0
					20	0
					18	0
					1	0
