# Supplementary material for: Nanopore direct RNA sequencing maps the complexity of Arabidopsis mRNA processing and m6A modification
Source: eLife. 2020 Jan 14;9:e49658. doi: 10.7554/eLife.49658 (PMC6959997; doi:10.7554/eLife.49658)
Supplement: Supplementary file 6. — Table showing examples of NMD sensitive alternative splicing events taken from Table 1 of Kalyna et al. (2012). which are supported by nanopore DRS reads. Duplicate genes and unsupported examples have been removed from the table. [Linked to Figure 4]. [file elife-49658-supp6.xlsx]

## Sheet: Supplementary file 6
Supplementary file 6. Known upf1 sensitive alternative splicing events which are supported by nanopore DRS read alignments. [Linked to Figure 4].
Table showing examples of NMD sensitive alternative splicing events taken from Table 1 of Kalyna et al.34 which are supported by nanopore DRS reads. Duplicate genes and unsupported examples have been removed from the table.
Gene ID	Gene Name	Alternative splicing class
AT1G55310	At-SCL33	Exon 4 alternative acceptor
AT2G37340	At-RS2Z33	Exon 3 alternative acceptor
AT4G16845	VRN2	Intron 2 retention
AT4G39260	GRP8/CCR1	Exon 1 alternative donor
AT1G77080	MAF1	Exon 4 alternative acceptor
AT2G02960	Zinc finger (C3HC4) protein	Exon 2 alternative acceptor
AT2G46790	APRR9/TL1	Exon 2 alternative donor
AT2G38880	NF-YB1/HAP3a	Exon 6 alternative donor
AT3G49430	At-SR34a	Intron 1 cassette exon
AT3G01150	At-PTB2a	Intron 2 Cassette exon, exon 8 alternative donor
AT3G13570	At-SCL30a	Intron 3 cassette exon
AT3G53500	At-RS2Z32	Exon 3 alternative acceptor
AT3G61860	At-RS31	Intron 2 cassette exon
AT2G21660	GRP7/CCR2	Exon 1 alternative donor
AT5G53180	At-PTB2b	Intron 3 cassette exon
AT4G25500	At-RS40	Intron 2 cassette exon
AT3G55460	At-SCL30	Intron 3 cassette exon
AT2G29210	Splicing factor PWI protein	Exon 6 alternative acceptor
AT1G07830	RPL29 family	Exon 1 alternative donor
AT1G02090	FUS5/CSN7/COP15	Exon 8 alternative acceptor
AT1G72560	PSD/Exportin-t	Exon 13 alternative donor
AT4G33060	CYP57	Intron 5 cassette exon
AT5G65060	MAF3	Exon 4 alternative acceptor
AT5G35410	SOS2/CIPK24	Exon 9 alternative acceptor
AT4G36960	RRM-containing protein	Intron 1 retention
