# Supplementary material for: Nanopore direct RNA sequencing maps the complexity of Arabidopsis mRNA processing and m6A modification
Source: eLife. 2020 Jan 14;9:e49658. doi: 10.7554/eLife.49658 (PMC6959997; doi:10.7554/eLife.49658)
Supplement: Supplementary file 7. — Change in gene expression of curated genes involved in flowering time in Arabidopsis, as detected using Illumina RNAseq for vir-1 compared with the VIR-complemented line. In all, 12.2% of flowering time genes show a change in mRNA level expression in the vir-1 mutant. Source of flowering time genes: George Coupland, Cologne: https://www.mpipz.mpg.de/14637/Arabidopsis_flowering_genes. Related to Figure 6. [file elife-49658-supp7.xlsx]

## Sheet: Supplementary file 7
Supplementary file 7. Flowering time gene expression. [Linked to Figure 6].
Change in gene expression of curated genes involved in flowering time in Arabidopsis, as detected using Illumina RNAseq for vir-1 compared with the VIR-complemented line.
In all, 12.2% of flowering time genes show a change in mRNA level expression in the vir-1 mutant.
Source of flowering time genes: George Coupland, Cologne: https://www.mpipz.mpg.de/14637/Arabidopsis_flowering_genes
AGI locus ID	Gene name	Pathway	log2 fold	Log2 counts per million	False Discovery Rate	Differentially expressed
			change			(abs logFC > 1, FDR < 0.05)
AT2G19520	FVE	Autonomous	-0.4	5.49	3.95e-08	-
AT2G21660	ATGRP7	Autonomous	0.03	6.11	0.857	-
AT2G43410	FPA	Autonomous	0.7	5.03	1.75e-11	-
AT3G04610	FLK	Autonomous	0.29	5.18	0.00059	-
AT3G10390	FLD	Autonomous	0.31	3.8	0.00668	-
AT4G02560	LD	Autonomous	0.68	4.36	7.49e-09	-
AT4G16280	FCA	Autonomous	0.71	5.02	2.9e-09	-
AT5G13480	FY	Autonomous	0.49	3.8	0.000878	-
AT4G22950	AGL19	FLC-independent vernalization pathway	1.1	0.81	0.000917	+
AT2G45660	SOC1	Floral integrator	-1.64	6.72	4.55e-84	+
AT5G60910	FUL	Floral integrator and flower meristem identity	-1.13	2.09	1.84e-09	+
AT1G25560	TEM1	Floral repressor	-0.81	6.5	0.0383	-
AT1G68840	TEM2	Floral repressor	-0.19	7.08	0.63	-
AT2G22540	SVP	Floral repressor	-0.29	6.96	0.0022	-
AT3G57390	AGL18	Floral repressor	0.1	3.3	0.536	-
AT5G13790	AGL15	Floral repressor	0.52	1.02	0.0722	-
AT1G24260	2003-09-01	Flower development	1.02	2.82	9.91e-09	+
AT1G02400	GA2ox6	Gibberellin	0.43	2.09	0.0369	-
AT1G14920	GAI	Gibberellin	-0.27	6.22	0.00595	-
AT1G15550	GA3ox1	Gibberellin	-0.68	1.36	0.0172	-
AT1G18075	miR159b	Gibberellin	0.72	0.13	0.0498	-
AT1G30040	GA2ox2	Gibberellin	-0.08	1.86	0.815	-
AT1G47990	GA2ox4	Gibberellin	-0.12	0.76	0.718	-
AT1G78440	GA2ox1	Gibberellin	-1.43	-0.19	0.000257	+
AT1G79460	GA2	Gibberellin	-0.33	2.8	0.0469	-
AT2G01570	RGA	Gibberellin	-0.09	7.22	0.401	-
AT3G05120	GID1A	Gibberellin	-0.33	4.93	0.00174	-
AT3G11440	MYB65	Gibberellin	-0.37	1.99	0.0423	-
AT3G63010	GID1B	Gibberellin	0.76	3.51	4.26e-12	-
AT4G02780	CPS1	Gibberellin	0.68	0.33	0.0228	-
AT4G24210	SLY1	Gibberellin	-0.39	4.02	0.00231	-
AT4G25420	GA20ox1	Gibberellin	0.18	1.48	0.558	-
AT5G06100	MYB33	Gibberellin	0.17	3.76	0.12	-
AT5G27320	GID1C	Gibberellin	-0.06	4.74	0.66	-
AT5G51810	GA20ox2	Gibberellin	-1.75	1.94	7.84e-14	+
AT5G03840	TFL1	Inflorescence architecture	-1.68	-0.43	1.64e-05	+
AT2G27990	PNF	Inflorescence meristem development	0.52	1.78	0.0016	-
AT5G02030	PNY	Inflorescence meristem development	0.08	4.08	0.524	-
AT1G04400	CRY2	Light perception	-0.28	7.25	0.00469	-
AT1G09570	PHYA	Light perception	0.01	7.56	0.935	-
AT2G18790	PHYB	Light perception	0.13	6.35	0.245	-
AT1G25540	PFT1	Light perception	0.28	4.49	0.00986	-
AT4G34530	CIB1	Light signalling	-0.99	4.14	0.000213	-
AT5G46210	CUL4	Light signalling	0.14	6.54	0.0776	-
AT4G24540	AGL24	Meristem response	-1.14	2.49	1.99e-08	+
AT4G35900	FD	Meristem response	-0.31	1.78	0.246	-
AT1G53090	SPA4	Photoperiod	0.17	4.96	0.0688	-
AT1G65480	FT	Photoperiod	-1.75	-0.32	6.1e-08	+
AT1G69570	CDF5	Photoperiod	-0.34	4.05	0.0797	-
AT2G28550	TOE1	Photoperiod	0.94	6.42	1.16e-24	-
AT2G32950	COP1	Photoperiod	0.53	5.43	5.84e-09	-
AT2G34720	NFYA4	Photoperiod	-0.31	5.45	0.00793	-
AT2G38880	NFYB1	Photoperiod	-0.44	3.93	8.79e-06	-
AT2G39250	SNZ	Photoperiod	0.65	4.99	2.46e-09	-
AT2G46340	SPA1	Photoperiod	0.58	7.45	4.89e-11	-
AT2G47700	RFI2	Photoperiod	-0.44	5.55	3.52e-05	-
AT3G15354	SPA3	Photoperiod	0.84	6.06	1.01e-13	-
AT3G47500	CDF3	Photoperiod	0.62	6.44	8.79e-11	-
AT3G48590	NFYC1	Photoperiod	-0.67	4.61	2.85e-09	-
AT3G54990	SMZ	Photoperiod	0.54	2.37	0.0139	-
AT4G11110	SPA2	Photoperiod	0.28	5.26	0.00256	-
AT4G14540	NFYB3	Photoperiod	0.23	5.21	0.0193	-
AT5G12840	NFYA1	Photoperiod	-0.3	5.15	0.000297	-
AT5G39660	CDF2	Photoperiod	-0.25	5.03	0.165	-
AT5G47640	NFYB2	Photoperiod	-0.3	6.06	0.00259	-
AT5G57660	COL5	Photoperiod	-0.67	8.85	7.86e-07	-
AT5G60120	TOE2	photoperiod	0.38	4.71	6.29e-05	-
AT5G62430	CDF1	Photoperiod	-0.01	5.5	0.925	-
AT3G22380	TIC	Photoperiod, circadian clock	0.68	8.16	5.64e-15	-
AT5G57360	ZTL	Photoperiod, circadian clock	0.18	6.13	0.0336	-
AT1G01060	LHY	Photoperiod, circadian clock	0.32	6.54	0.0185	-
AT1G09530	PIF3	Photoperiod, circadian clock	-0.31	4.76	0.0449	-
AT1G12910	LWD1	Photoperiod, circadian clock	-0.29	4.94	0.00313	-
AT1G22770	GI	Photoperiod, circadian clock	0.93	5.13	3.98e-16	-
AT2G18915	LKP2	Photoperiod, circadian clock	-0.38	4.47	0.00223	-
AT2G21070	FIO1	Photoperiod, circadian clock	0.31	2.93	0.0167	-
AT2G25930	ELF3	Photoperiod, circadian clock	0.99	4.41	1.04e-14	-
AT2G40080	ELF4	Photoperiod, circadian clock	1.01	-0.36	0.0022	+
AT2G46790	PRR9	Photoperiod, circadian clock	1.55	5.39	3.77e-20	+
AT2G46830	CCA1	Photoperiod, circadian clock	0.04	7.64	0.718	-
AT3G04910	WNK1	Photoperiod, circadian clock	-0.41	7.16	0.000229	-
AT3G26640	LWD2	Photoperiod, circadian clock	-0.57	3.75	1.89e-06	-
AT3G46640	LUX	Photoperiod, circadian clock	0.26	3.28	0.186	-
AT3G60250	CKB3	Photoperiod, circadian clock	-0.53	5.49	3.48e-06	-
AT4G08920	CRY1	Photoperiod, circadian clock	-0.36	8.36	5.54e-05	-
AT4G16250	PHYD	Photoperiod, circadian clock	1.14	4.13	1.97e-19	+
AT4G18130	PHYE	Photoperiod, circadian clock	0.77	5.5	1.49e-14	-
AT5G02810	PRR7	Photoperiod, circadian clock	0.23	7.01	0.00561	-
AT5G08330	CHE	Photoperiod, circadian clock	-0.86	6.21	8.99e-11	-
AT5G24470	PRR5	Photoperiod, circadian clock	0.31	2.67	0.229	-
AT5G35840	PHYC	Photoperiod, circadian clock	0.46	5.53	2.5e-06	-
AT5G37260	CIR1	Photoperiod, circadian clock	0.25	3.12	0.16	-
AT5G59560	SRR1	Photoperiod, circadian clock	-0.28	3.43	0.0474	-
AT5G60100	PRR3	Photoperiod, circadian clock	1.69	0.92	5.93e-11	+
AT5G61380	PRR1	Photoperiod, circadian clock	0.12	3.91	0.392	-
AT5G64813	LIP1	Photoperiod, circadian clock	-0.33	4.75	0.000534	-
AT1G68050	FKF1	Photoperiod, circadian clock	0.68	-0.32	0.0391	-
AT5G17690	TFL2	Photoperiod, vernalization and flower development	0	4.46	0.997	-
AT2G42200	SPL9	Vegetative and reproductive phase change	0.42	3.03	0.0086	-
AT3G57920	SPL15	Vegetative and reproductive phase change	0.89	0.49	0.0134	-
AT1G53160	SPL4	Vegetative to reproductive transition	-1.75	2.89	1.38e-20	+
AT2G25095	miR156a	Vegetative to reproductive transition	0.49	0.32	0.0978	-
AT2G33810	SPL3	Vegetative to reproductive transition	-1.55	4.69	4.76e-20	+
AT3G15270	SPL5	Vegetative to reproductive transition	-1.94	1.48	9.23e-15	+
AT4G31877	miR156c	Vegetative to reproductive transition	-0.67	0.51	0.0222	-
AT1G17760	Cstf77	Vernalization	0.23	4.42	0.0452	-
AT1G71800	Cstf64	Vernalization	0.52	3.29	4.32e-05	-
AT3G18990	VRN1	Vernalization	-0.12	4.78	0.154	-
AT4G00650	FRI	Vernalization	0.26	2.78	0.151	-
AT5G10140	FLC	Vernalization	-6.06	1.29	2.44e-64	+
AT1G61040	VIP5	–	0.42	4.98	3e-08	-
AT2G06210	VIP6	–	0.09	5.54	0.363	-
AT2G31650	ATX1	–	0.51	2.96	0.00701	-
AT3G48430	REF6	–	0.26	5.21	0.0189	-
AT4G20400	Jmj4	–	0.22	5.26	0.0181	-
AT5G04240	ELF6	–	0.34	4.96	0.000465	-
AT1G08970	NFYC3	–	-0.64	5.32	1.57e-15	-
AT1G14400	UBC1	–	-0.59	6.65	1.1e-10	-
AT1G54830	NFYC9	–	-0.57	4.25	8.5e-08	-
AT1G55250	HUB2	–	-0.12	4.83	0.225	-
AT1G56170	NFYC2	–	-0.29	3.59	0.021	-
AT1G76710	SDG26	–	-0.01	3.53	0.947	-
AT1G77080	MAF1	–	-0.31	5.01	0.000271	-
AT1G77300	EFS	–	0.87	5.69	2.31e-11	-
AT1G79730	ELF7	–	0.58	5.26	2.31e-11	-
AT2G02760	UBC2	–	-0.35	6.12	2.08e-05	-
AT2G23380	CLF	–	0.18	4.07	0.268	-
AT2G33835	FES	–	0.18	3.32	0.116	-
AT2G44950	HUB1	–	0.11	4.92	0.245	-
AT2G45640	SAP18	–	-0.86	5.11	1.98e-15	-
AT3G12810	PIE1	–	0.93	5.33	1.07e-17	-
AT3G24440	VIL1	–	0.41	3.99	0.000318	-
AT3G33520	ESD1	–	-0.16	4.09	0.16	-
AT3G49600	UBP26	–	0.41	4.92	2.39e-05	-
AT4G15880	ESD4	–	0	4.68	0.96	-
AT4G16845	VRN2	–	-0.03	4.17	0.795	-
AT4G29830	VIP3	–	-0.22	3.96	0.0123	-
AT4G32980	ATH1	–	0.94	4.91	2.84e-15	-
AT4G39400	BRI1	–	0.22	7.58	0.134	-
AT5G11530	EMF1	–	0.43	4.7	0.000455	-
AT5G16320	FRL1	–	0.09	2.57	0.641	-
AT5G23150	HUA2	–	1.38	5.55	2.97e-26	+
AT5G37055	SEF	–	-0.44	2.64	0.00211	-
AT5G51230	EMF2	–	0.36	5.12	8.51e-06	-
AT5G61150	VIP4	–	0.07	5.73	0.471	-
AT5G65050	MAF2	–	-0.27	5.31	0.00258	-
AT5G65060	MAF3	–	-0.64	3.89	9.91e-09	-
AT5G65070	MAF4	–	-0.2	0.46	0.402	-
