# Supplementary material for: Nanopore direct RNA sequencing maps the complexity of Arabidopsis mRNA processing and m6A modification
Source: eLife. 2020 Jan 14;9:e49658. doi: 10.7554/eLife.49658 (PMC6959997; doi:10.7554/eLife.49658)
Supplement: Supplementary file 8. [file elife-49658-supp8.xlsx]

## Sheet: Supplementary file 8
Supplementary file 8. Primers used in this study.
Primer name	Primer sequence	Experiment	Gene or gene coordinates
At1g29550 F	ATGGTGGTTACGGATTCTCCA	Chimeric RNA detection RT-PCR	AT1G29550-AT1G29560
At1g29560 R	TTAAACTCCATCTCCCTCTTT
F_spl2_A	GCTGTGTTCCTTTTCTCAGCA	Splicing events validation RT-PCR	AT2G27385
R_spl2_A	CTGCCTTGGAGTTCTGCTTC
F_spl5_A	AGGGATAAGCTCTTCTTTTTCC	Splicing events validation RT-PCR	3:12559692–12559814
R_spl5_A	CGACGGTGACAACGAACC
F_spl7_AB	GTGGTGTTGAGCCGGAGT	Splicing events validation RT-PCR	AT3G42806
R_spl7_B	CTTTCTCGGTGGCTTTTCTC
F_spl8_B	ATATGGACGATACTTTATACCCTTTG	Splicing events validation RT-PCR	AT3G62040
R_spl8_B	AGCCATGGTGGTTCCATATT
F_spl9_AB	AATATTTTCCGGTGAATAGCC	Splicing events validation RT-PCR	AT3G26395
R_spl9_B	AAGCCCAGAATCCGGTGA
CCA1_For	GATGATGTTGAGGCGGATG	RT-qPCR (clock phenotype)	AT2G46830
CCA1_Rev	TGGTGTTAACTGAGCTGTGAAG
UBC21_For	CTGCGACTCAGGGAATCTTCTAA	RT-qPCR (clock phenotype)	AT5G25760
UBC21_Rev	TTGTGCCATTGAATTGAACCC
F_GFP_CDS_T7prom_NotI	GCGGCCGC TAATACGACTCACTATAGGGAGA ATGAGTAAAGGAGAAGAACTTTTCACTG	PCR	mGFP
R_GFP_CDS_AscI	GGCGCGCC TTATTTGTATAGTTCATCCATGCCATG
FLC-Fwd	GAGCCAAGAAGACCGAACTC	RT-qPCR (flowering phenotype)	AT5G10140
FLC-Rev	TTCTGCTCCCACATGATGA
RT41clip	NNGTATNNNAGATCGGAAGAGCGTCGTGgatcCTGAACCGC	miCLIP library preparation	–
RT48clip	NNTGTGNNNAGATCGGAAGAGCGTCGTGgatcCTGAACCGC
RT49clip	NNTTCTNNNAGATCGGAAGAGCGTCGTGgatcCTGAACCGC
RT50clip	NNTTTCNNNAGATCGGAAGAGCGTCGTGgatcCTGAACCGC
