# Supplementary material for: Nanopore direct RNA sequencing maps the complexity of Arabidopsis mRNA processing and m6A modification
Source: eLife. 2020 Jan 14;9:e49658. doi: 10.7554/eLife.49658 (PMC6959997; doi:10.7554/eLife.49658)
Supplement: Supplementary file 9. [file elife-49658-supp9.xlsx]

## Sheet: Notes
Introduction
The Key Resources Table is designed to highlight the reagents and resources used in a specific study. Please include the genetically modified organisms and strains, cell lines, reagents, and software that are essential to reproduce the results presented. Note that datasets should be included in the datasets section of the submission form.
Please include a completed Key Resources Table at the start of the Materials and Methods section within your article file (this table does not need to be numbered). For consistency, please do not add subheadings to the table. Any references in the Source column should also be included in the list of references. Datasets should be entered within the datasets section of the submission form. A table…
The Key Resources Table does not need to be an exhaustive list of all the materials and resources used (e.g., essential chemicals and standard culture media do not need to be included). Please ensure that the items listed in the table are reported in the Materials and Methods section within the context of their use. We suggest that no more than ten primers and RNA sequences are included in this t…
Guidelines for creation of the Key Resources Table
Some of the constraints below are imposed to allow automated parsing of the table.
Columns (general):
(1) Column order and headings must be preserved.
(2) Columns A-E should not be removed, even if not used.
(3) Columns can be appended (F, G, etc.) for internal use.
Rows (general):
(1) Row titles (preceding the parentheses) must be preserved.
(2) Row one (column headings) should not be removed.
(3) Row 2 (headings with instructions) can be removed.
(4) Order of the rows can be changed.
(5) Clustering of multiple reagents of one type recommended, but is not mandatory.
(6) Reagent types indicated on template that are not used can be removed.
(7) Reagent types not represented in the template: use “other”.
Column A: Reagent type (mandatory)
(1) Row title (preceding parentheses) cannot be changed.
(2) See descriptions of categories in “Reagent categories” section below.
(3) If appropriate, include species within parentheses. Use full genus and full species for first mention; thereafter, initial for genus may be used.
(4) If appropriate, indicate sex after species (within the parentheses); separate by comma, space.
(5) See additional information in the section “Rows (general)” above.
Column B: Symbol/name used in publication (mandatory)
(1) This is a free-text field; there are no formatting constraints, except for separation of multiple entries by semi-colon, space.
(2) Should indicate exactly how the reagent is referred to in the publication. If several designations are used for one reagent, can include more than one entry, separated by semi-colon, space. If one designation has been used to refer to several different reagents, list each reagent separately and include a unique identifier or description parenthetically.
(3) If there is a semi-colon within the designation used, add double quotes around the entire phrase.
(4) Additional defining information can be included parenthetically (if brief).
Columns C: Source (mandatory)
(1) If reagent obtained from a public source, such as a stock center or company, list resource name.
(2) If not obtained from public source, but a published description is available, list the DOI or PMID for the publication.
(3) If reagent newly created in the publication, enter “this paper”.
(4) If none of the above, enter “other” and explain in Additional Information (Column E).
(5) If it is appropriate to indicate both a publication and a lab or researcher that provided the reagent, list the publication in this field and the lab or researcher in Additional Information.
Column D: Identifiers (not mandatory; use if possible)
(1) Use the format “ID_source:identifier” with a colon and no spaces. Separate multiple entries with a semi-colon, space.
(2) If possible, use the recommended abbreviation for the ID_source (see below).
(3) Multiple identifiers, even if redundant, are useful for validation. In some case a more general identifier (for a stock, for instance) can be combined with a more precise identifier (for the allele of interest in that stock).
(4) Inclusion of database identifiers is strongly encouraged to facilitate accurate incorporation of published data into appropriate biological databases.
Column E: Additional information
(1) Mandatory if column C entry is “this paper” or “other”. Description of new reagent or laboratory from which reagent obtained. (Free text)
(2) For antibodies, indicate dilution in parentheses (to avoid auto-formatting problems).
(3) Other pertinent information, including pointers to supplementary information or Methods section, if appropriate. (Free text)
Additional columns can be added for internal purposes (and removed prior to submission for publication): tracking acquisition by the lab, lab-specific stock numbers, storage location in the lab, comments about problems or QC, etc.
Reagent and resource categories
● Gene (indicate species) - not strictly a reagent, but unambiguous identification critical for genetic research and genetic databases.
● Strain, strain background (indicate species) - applies to whole organism; includes bacterial and virus strains or isolates. Indicate sex, if applicable.
● Genetic reagent (indicate species) - applies to mutations and variants in whole organism, including transgenically introduced constructs. For transgenic lines, indicate host species. Indicate sex, if applicable.
● Cell line (indicate species) - if a primary cell line, describe in Additional Information. Indicate sex, if applicable.
● Transfected construct (indicate species) - in cell line. Generally, indicate species of cell line; use species of construct component if that is more relevant and explain in Additional Information.
● Biological sample (indicate species) - any other biological entity, ranging from isolated tissue to defined population; describe in Additional Information. Indicate sex, if applicable.
● Antibody - include host organism common name and clonality (e.g., “mouse monoclonal”); include dilution used in Additional Information (within parentheses to avoid auto-formatting problems).
● Recombinant DNA reagent - traditional cultured clones, plasmids, cDNAs, etc., including recombinant DNA libraries.
● Sequence-based reagent - oligonucleotides, primers, morpholinos, etc.; indicate sequence.
● Peptide, recombinant protein - generally, commercially available reagents.
● Chemical compound, drug - generally, commercially available reagents.
● Commercial assay, kit - detection assays; labeling and sample preparation kits.
● Software, algorithm - newly created or previously existing.
● Other - miscellaneous other categories, including histological stains.

## Sheet: Example
Reagent type. Duplicate rows as needed. Order is flexible, but row titles must be preserved. Species (mandatory if applicable). Append in parentheses. First mention, use full genus.	Designation. Symbol/name used in publication. Separate multiple entries with semi-colon, space. (If semi-colon within designation, delimit wtith double quotes.)	Source (public). Stock center, company, data repository. Reference. Include PMID or doi; use “this paper” if new. If neither applies enter “other” and explain in Additional Information.	Identifiers. Format as ID_source:identifier. Separate multiple entries with semi-colon, space. Include catalog numbers, stock numbers, database IDs or accession numbers, RRIDs.	Additional information. Mandatory if column C entry is “this paper” or “other”. Description of new reagent; laboratory from which reagent obtained; other pertinent information.
Key Resources Table
Reagent type (species) or resource	Designation	Source or reference	Identifiers	Additional information
gene (Drosophila melanogaster)	nito	NA	FLYB:FBgn0027548
gene (D. melanogaster)	Sxl	NA	FLYB:FBgn0264270
genetic reagent (D. melanogaster)	MTD-Gal4	Bloomington Drosophila Stock Center	BDSC:31777; FLYB:FBtp0001612; RRID:BDSC_31777	FlyBase symbol: P{GAL4-nos.NGT}
genetic reagent (D. melanogaster)	ap-Gal4	Bloomington Drosophila Stock Center	BDSC:3041; FLYB:FBti0002785; RRID:BDSC_3041	FlyBase symbol: P{GawB}ap[md544]
genetic reagent (D. melanogaster)	nub-Gal4	PMID:20798049	FLYB:FBti0016825	FlyBase symbol: P{GawB}nubbin-AC-62
genetic reagent (D. melanogaster)	dome-Gal4	PMID:12403714	FLYB:FBti0022298	FlyBase symbol: P{GawB}dome[PG14]
genetic reagent (D. melanogaster)	UAS-2xEYFP	PMID:12324968	FLYB:FBtp0016537	FlyBase symbol: P{UAS-2xEYFP}
genetic reagent (D. melanogaster)	nito[HP25329]	Bloomington Drosophila Stock Center	BDSC:22092; FLYB:FBal0238892; RRID:BDSC_22092	Genotype: w[1118]; P{w[+mC]=EPg}nito[HP25329]/CyO
genetic reagent (D. melanogaster)	nito[1]	this paper		Progenitor = nito[HP25329]; imprecise excision; lethal
genetic reagent (D. melanogaster)	nito shRNA (HMJ02081)	Bloomington Drosophila Stock Center	TRiP:HMJ02081; BDSC:56852; RRID:BDSC_56852	FlyBase symbol: P{TRiP.HMJ02081}attP40
genetic reagent (D. melanogaster)	nito dsRNA (VDRC 20942)	Vienna Drosophila RNAi Center	VDRC:20942
genetic reagent (D. melanogaster)	FRT[G13]	Bloomington Drosophila Stock Center	BDSC:1956; FLYB:FBti0001247	FlyBase symbol: P{FRT(whs)}G13
genetic reagent (D. melanogaster)	"y w hsflp; ubiGFP FRT[G13]"	PMID:18160348
cell line (D. melanogaster)	S2	other	FLYB:FBtc0000181; RRID:CVCL_Z992	Cell line maintained in N. Perrimon lab; FlyBase symbol: S2-DRSC.
antibody	anti-Nito	this paper		Rabbit polyclonal; against aa 479-500; used YZ3137 (1:500)
antibody	anti-alpha-Spectrin (mouse monoclonal)	Developmental Studies Hybridoma Bank	DSHB:3A9; RRID:AB_528473	(1:10)
antibody	anti-Vasa (rabbit polyclonal)	Santa Cruz Biotechnology	Santa Cruz:sc-30210; RRID:AB_793874	(1:250)
antibody	anti-Sxl (mouse monoclonal)	Developmental Studies Hybridoma Bank	DSHB:M18; RRID:AB_528464	(1:10)
antibody	anti-GFP (rabbit polyclonal)	Molecular Probes	Molecular Probes:A-6455; RRID:AB_221570	(1:1000)
antibody	anti-GFP (mouse monoclonal)	Molecular Probes	Molecular Probes:A-11120; RRID:AB_221568	(1:200)
antibody	anti-HA (rat monoclonal)	Roche	Roche:3F10; RRID:AB_2314622
antibody	Alexa 488- or 555- secondaries	Molecular Probes		(1:1000)
other	DAPI stain	Molecular Probes		(1:1000)
recombinant DNA reagent	pAGW (Gateway vector)	Drosophila Genomics Resource Center	DGRC:1071
recombinant DNA reagent	pAHW (Gateway vector)	Drosophila Genomics Resource Center	DGRC:1095
recombinant DNA reagent	GH11110 (cDNA)	Drosophila Genomics Resource Center	DGRC:5666
recombinant DNA reagent	GFP-Nito (plasmid)	this paper		Progenitors: GH11110 (cDNA); Gateway vector pAGW
recombinant DNA reagent	HA-Sxl (plasmid)	PMID:16207758		Progentiors: PCR, UAS-Sxl flies; Gateway vector pAHW
recombinant DNA reagent	GFP-Sxl (plasmid)	PMID:16207758		Progentiors: PCR, UAS-Sxl flies; Gateway vector pAGW

## Sheet: key_resources_table
Reagent type. Duplicate rows as needed. Order is flexible, but row titles must be preserved. Species (mandatory if applicable). Append in parentheses. First mention, use full genus. Sex (if applicable). Add within parentheses after species.	Designation. Symbol/name used in publication. Separate multiple entries with semi-colon, space. (If semi-colon within designation, delimit wtith double quotes.)	Source (public). Stock center, company, data repository. Reference. Include PMID or DOI; use “this paper” if new. If neither applies enter “other” and explain in Additional Information.	Identifiers. Format as ID_source:identifier. Separate multiple entries with semi-colon, space. Include catalog numbers, stock numbers, database IDs or accession numbers, RRIDs.	Additional information. Mandatory if column C entry is “this paper” or “other”. Description of new reagent; laboratory from which reagent obtained; other pertinent information. For antibodies, indicate dilution and conditions used.
Key Resources Table
Reagent type (species) or resource	Designation	Source or reference	Identifiers	Additional information
gene (Arabidopsis thaliana)	VIRILIZER, VIR	NA	TAIR/ABRC: AT3G05680
gene (Arabidopsis thaliana)	HUA ENHANCER 2, HEN2	NA	TAIR/ABRC: AT2G06990
mutant line (Arabidopsis thaliana Col-0 background)	vir-1	Růžička et al., 2017, 10.1111/nph.14586	NA	Mutant line identified by EMS genetic screen. Gifted by K. Růžička, Brno.
mutant line (Arabidopsis thaliana vir-1 background)	pVIR::GFP-VIR (VIR complemented line; VIRc)	Růžička et al., 2017, 10.1111/nph.14586	NA	vir-1 mutant transformed with VIR genomic sequence fused to GFP under expression of the VIR promoter. Gifted by K. Růžička, Brno.
mutant line (Arabidopsis thaliana Col-0 background)	hen2-2	Lange et al., 2011, 10.1111/j.1365-313X.2011.04675.x	TAIR/ABRC:GK_774H07	T-DNA insertion line. Gifted by D. Gagliardi, Strasbourg
antibody	N-methyladenosine antibody	Synaptic Systems	Cat#: 202 003
peptide, recombinant protein	T4 DNA ligase	New England Biolabs® Inc.	Cat#: M0202
peptide, recombinant protein	Calf Intestinal Alkaline Phosphatase	Thermo Fisher Scientific	Cat#: 18009019_x000D_
peptide, recombinant protein	Cap-Clip™ Acid Pyrophosphatase	Cambio	Cat#: C-CC15011H
peptide, recombinant protein	T4 Polynucleotide Kinase	New England Biolabs® Inc.	Cat#: M0201L
peptide, recombinant protein	T4 RNA Ligase 1 (ssRNA Ligase)	New England Biolabs® Inc.	Cat#: M0204L
peptide, recombinant protein	Proteinase K Solution (20 mg/mL)	Thermo Fisher Scientific	Cat#: AM2546
peptide, recombinant protein	CircLigase™ II ssDNA Ligase	Lucigen	Cat#: CL9025K
sequence-based reagent	ERCC RNA Spike-In mix	Thermo Fisher Scientific	Cat#: 4456740
sequence-based reagent	5’ biotinylated RNA adapter	Dharmacon (Horizon Discovery)	NA	Custom made adapter with 5' end biotin tag. Sequence: 5’-CGACUGGAGCACGAGGACACUGACAUGGACUGAAGGAGUAGAAA-3’
sequence-based reagent	L3-App adapter	Integrated DNA Technologies	NA	Custom made adapter with adenylation at the 5’ end (rApp) and dideoxycytdine (ddC) at the 3’ end. Sequence: 5'-rApp/AGATCGGAAGAGCGGTTCAG/ddC/-3'
sequence-based reagent	Cut Oligo	Integrated DNA Technologies	NA	Custom made oligo. Sequence: 5'-GTTCAGGATCCACGACGCTCTTCaaaa-3'
sequence-based reagent	MALAT1 control	Integrated DNA Technologies	NA	Custom made oligo. Sequence: 5’-AAGUAAUUCAAGAUCAAGAGUAAUUACCAACUUAAUGUUUUUGCAUUGGACUUUGAGUUA(A50)-3’
sequence-based reagent	MALAT1 m6A	Integrated DNA Technologies	NA	Custom made oligo with m6A modification. Sequence: 5’-AAGUAAUUCAAGAUCAAGAGUAAUUACCAACUUAAUGUUUUUGCAUUGGm6ACUUUGAGUUA(A50)-3’
commercial assay or kit	Rneasy Plant Mini kit	QIAGEN	Cat#: 74904
commercial assay or kit	TURBO DNA-free™ Kit	Thermo Fisher Scientific	Cat#: AM1907
commercial assay or kit	CloneAmp™ HiFi PCR Premix	Clontech	Cat#: 639298
commercial assay or kit	GeneJET Gel Extraction and DNA Cleanup Micro Kit	Thermo Fisher Scientific	Cat#: K0831
commercial assay or kit	mMESSAGE mMACHINE™ T7 ULTRA Transcription Kit	Thermo Fisher Scientific	Cat#: AM1345
commercial assay or kit	MEGAclear™ Transcription Clean-Up Kit	Thermo Fisher Scientific	Cat#: AM1908
commercial assay or kit	SuperScript™ III Reverse Transcriptase	Thermo Fisher Scientific	Cat#: 18080044
commercial assay or kit	SuperScript™ IV VILO™ Master Mix	Thermo Fisher Scientific	Cat#: 11756500
commercial assay or kit	pGEM®-T Easy Vector Systems	Promega	Cat#: A1360
commercial assay or kit	SYBR Green I	QIAGEN	Cat#: S9430
commercial assay or kit	NEBNext® Ultra™ Directional RNA Library Prep Kit for Illumina®_x000D_	New England Biolabs® Inc.	Cat#: E7420
commercial assay or kit	TruSeq Stranded Total RNA with Ribo-Zero Plant_x000D_	Illumina	Cat#: RS-122-2401
commercial assay or kit	Dynabeads™ mRNA Purification Kit (for mRNA purification from total RNA preps)	Thermo Fisher Scientific	Cat#: 61006
commercial assay or kit	Nanopore Direct RNA sequencing kit	Oxford Nanopore Technologies	Cat#: SQK-RNA001
commercial assay or kit	MinION Flow cell with r9.4 pore	Oxford Nanopore Technologies	Cat#: FLO-MIN106
commercial assay or kit	Quick Ligase reaction buffer	New England Biolabs® Inc.	Cat#: B6058S
commercial assay or kit	Agencourt RNAclean XP magnetic beads	Beckman Coulter	Cat#: A63987
commercial assay or kit	Dynabeads MyOne Streptavidin C1 beads	Thermo Fisher Scientific	Cat#: 65001
commercial assay or kit	PolyATtract® mRNA Isolation Systems	Promega	Cat#: Z5310
commercial assay or kit	RNA Fragmentation Reagents	Thermo Fisher Scientific	Cat#: AM8740
commercial assay or kit	Qubit™ RNA BR Assay Kit	Thermo Fisher Scientific	Cat#: Q10210
commercial assay or kit	Pierce™ Protein A/G Magnetic Beads	Thermo Fisher Scientific	Cat#: 88802
commercial assay or kit	AccuPrime™ SuperMix I	Thermo Fisher Scientific	Cat#: 12342010
commercial assay or kit	Agencourt AMPure XP	Beckman Coulter	Cat#: A63881
commercial assay or kit	Qubit™ dsDNA HS Assay Kit	Thermo Fisher Scientific	Cat#: Q32851
software, algorithm	MinKNOW (multiple versions)	Oxford Nanopore Technologies	NA	MinKNOW software has mandatory self-updates.
software, algorithm	Guppy v2.3.1	Oxford Nanopore Technologies	NA
software, algorithm	FastQC v0.11.8	bioinformatics.babraham.ac.uk/projects/fastqc	NA
software, algorithm	MultiQC v1.7	Ewels et al., 2016, 10.1093/bioinformatics/btw354	NA
software, algorithm	cutadapt 1.18	Martin, 2011, 10.14806/ej.17.1.200	NA
software, algorithm	STAR v2.6.1	Dobin et al. 2013, 10.1093/bioinformatics/bts635	NA
software, algorithm	Minimap2 v2.8	Li, 2018, 10.1093/bioinformatics/bty191	NA
software, algorithm	Nanopolish v0.11.0	Workman et al., 2018, 10.1101/459529	NA
software, algorithm	UMI-tools v0.5.5	Smith et al., 2017, 10.1101/gr.209601.116	NA
software, algorithm	samtools v1.9	Li et al., 2009, 10.1093/bioinformatics/btp352	NA
software, algorithm	pysam v0.15.2	github.com/pysam-developers/pysam	NA
software, algorithm	biopython v1.71	Dalke et al., 2009 10.1093/bioinformatics/btp163	NA
software, algorithm	seqkit v0.10.0	Shen et al., 2016, 10.1371/journal.pone.0163962	NA
software, algorithm	salmon v0.11.2	Patro et al. 2017, 10.1038/nmeth.4197	NA
software, algorithm	featureCounts v1.6.3 (part of subread package)	Liao et al., 2013, 10.1093/nar/gkt214	NA
software, algorithm	bedtools v2.27.1	Quinlan et al., 2010, 10.1093/bioinformatics/btq033	NA
software, algorithm	tximport v1.10.1	Soneson et al., 2016, 10.12688/f1000research.7563.2	NA
software, algorithm	edgeR v3.24.3	Robinson et al., 2010, 10.1093/bioinformatics/btp616	NA
software, algorithm	DERfinder v1.16.1	Collado-Torres et al., 2017, 10.1093/nar/gkw852	NA
software, algorithm	DEXSeq v1.28.3	Anders et al., 2012, 10.1101/gr.133744.111	NA
software, algorithm	FLASh v1.2.11	Magoc et al., 2011, 10.1093/bioinformatics/btr507	NA
software, algorithm	proovread v2.14.1	Hackl et al., 2014, 10.1093/bioinformatics/btu392	NA
software, algorithm	blastn v2.7.1	Camacho et al., 2009, 10.1186/1471-2105-10-421	NA
software, algorithm	MEME v5.0.2 (part of MEME suite)	Bailey et al., 2009, 10.1093/nar/gkp335	NA
software, algorithm	FIMO v5.0.2 (part of MEME suite)	Grant et al., 2011, 10.1093/bioinformatics/btr064	NA
software, algorithm	Piranha v1.2.1	Uren et al., 2012, 10.1093/bioinformatics/bts569	NA
software, algorithm	idr v2.0.3	github.com/nboley/idr	NA
software, algorithm	Python v3.6.7	python.org	NA
software, algorithm	R v3.5.1	r-project.org	NA
software, algorithm	Keras v2.2.4	keras.io	NA
software, algorithm	Tensorflow v1.10.0	tensorflow.org	NA
software, algorithm	Nanopore DRS basecalling/mapping pipeline	This paper	NA	Snakemake pipeline and python scripts used to basecall nanopore DRS data, map to reference genome/transcriptome, quantify gene expression, create bigwig tracks of 5'/3' coverage and extract softclipped regions. Available on github at https://github.com/bartongroup/NS_Nanopore_paper/tree/master/pipeline/basecalling_pipeline
software, algorithm	Illumina RNAseq mapping pipeline	This paper	NA	Snakemake pipeline used to analyse Illumina RNAseq data. Performs QC, mapping, quantifies gene expression, creates bigwig tracks of coverage, runs DERfinder and edgeR to identify differentially expressed regions/genes. Available on github at https://github.com/bartongroup/NS_Nanopore_paper/tree/master/pipeline/illumina_rnaseq_pipeline
software, algorithm	miCLIP analysis pipeline	This paper	NA	Snakemake pipeline used to analyse Illumina miCLIP data. Performs QC, adapter trimming and demultiplexing, mapping, and peak calling. Available on github at https://github.com/bartongroup/NS_Nanopore_paper/tree/master/pipeline/miCLIP_pipeline
software, algorithm	Error correction pipeline	This paper	NA	Snakemake pipeline used to error correct nanopore DRS reads with orthogonal Illumina RNAseq data. Available online at https://github.com/bartongroup/NS_Nanopore_paper/tree/master/pipeline/error_correction_pipeline
software, algorithm	Adapter detection pipeline and scripts	This paper	NA	Snakemake pipeline, jupyter notebooks, and python scripts used to perform 5' adapter detection analyses. Notebooks used to produce training data and train machine learning model are available on github at https://github.com/bartongroup/MP_adapter_detector . Scripts used to apply model are also available at https://github.com/bartongroup/MP_adapter_detector . Pipeline used to apply model is availa…
software, algorithm	RNA modification detection pipeline and scripts	This paper	NA	Snakemake pipeline and python scripts used to perform differential error rate analysis to detect m6A. Scripts used to detect m6A are available on github at XXX. Pipeline used to apply m6A detection scripts and identify motifs is available on github at https://github.com/bartongroup/NS_Nanopore_paper/tree/master/pipeline/error_rate_pipeline
software, algorithm	APA and Chimera detection pipelines and scripts	This paper	NA	Snakemake pipeline, jupyter notebooks and python scripts used to detect chimeras and alternative polyadenylation. Snakemake pipeline is available on github at: https://github.com/bartongroup/NS_Nanopore_paper/tree/master/pipeline/chimera_pipeline
software, algorithm	Notebooks to generate figures	This paper	NA	Jupyter notebooks and associated scripts used to generate figures for the paper, available online at https://github.com/bartongroup/NS_Nanopore_paper/tree/master/notebooks
